# Supplementary material for: Eliminating Mosquitoes with Precision Guided Sterile Males
Source: Research Square preprint supplement (doi:10.21203/rs.3.rs-367110/v1), 2021-04-05
Supplement: Supplementary file 1 [file Table S1 - myo-fem and βTub TPM gene expression.xlsx]

## Sheet: Sheet1
	Table S1 - myo-fem and βTub developmental gene expression data
	ID	Ae. albopictus*	Ae. aegypti**		Ae. albopictus*	Ae. aegypti**
	Gene name	Myo-fem	Myo-Fem		βTub	βTub
	male_testes	0.416872	0.0981948		4097.84	14.232
	male_carcass	1.23806	0.0998974		2.55211	170.336
	NBF_carcass	400.999	41.2168		1.14457	0.0599963
	PBM_carcass_12hr	554.077	95.982		0.515837	0.101174
	PBM_carcass_24hr	779.261	94.7649		0.33216	0.100969
	PBM_carcass_36hr	1113.28	222.681		0.472283	0.379921
	PBM_carcass_48hr	1804.5	466.551		0.614054	0.154455
	PBM_carcass_60hr	822.014	587.303		1.09927	0.557219
	PBM_carcass_72hr	1557.79	272.298		0.688698	0.414251
	NBF_Ovaries	2.2497	0.310713		1.43268	0.0637718
	PBM_Ovaries_12hr	0.935219	0.551928		0.976041	0.0896798
	PBM_Ovaries_24hr	0.922913	0.588657		0.465475	0.0998062
	PBM_Ovaries_36hr	0.4021	0.320646		0.505269	0
	PBM_Ovaries_48hr	0.347661	0.670666		0.566476	0.0706851
	PBM_Ovaries_60hr	0.815745	1.15088		0.824022	0.272001
	PBM_Ovaries_72hr	1.04742	1.11326		0.697404	0.289419
	Embryo_0_1	0.175421	1.21669		0.58007	0
	Embryo_0_4	0.351675	1.86944		0.599836	0.169538
	Embryo_4_8	0.364288	1.73292		0.908584	0
	Embryo_8_12	1.46992	2.2554		0.853017	0.98638
	Embryo_12_16	0.244061	2.42068		1.03291	0.639982
	Embryo_16_20	0.272056	1.86531		1.01528	0.281939
	Embryo_20_24	0.327689	1.78395		0.844084	0.161785
	Embryo_24_28	0.214108	0.442161		0.826906	0.287378
	Embryo_28_32	0.105228	0.402243		1.06207	0.168064
	Embryo_32_36	0.0933464	0.431532		1.35973	0.168281
	Embryo_36_40	4.87955	0.547161		0.874184	0.198486
	Embryo_40_44	0.264531	0.546245		1.50513	0.101436
	Embryo_44_48	2.03747	0.581147		1.49936	0.116218
	Embryo_48_52	2.33646	0.35535		0.652789	0
	Embryo_52_56	0.29826	0.667847		1.49299	0.0542575
	Embryo_56_60	0.565556	0.202466		1.01217	0.225584
	Embryo_60_64	0.758946	0.331924		1.29014	0.258876
	Embryo_64_68	0.108518	0.9448		3.29654	0.236178
	Embryo_68_72	1.23306	0.156596		1.18381	0.0814221
	1st_instar_larvae	1.45124	0.177577		0.232593	0.319608
	2nd_instar_larvae	1.43835	0.195321		0.392967	0.179219
	3rd_instar_larvae	2.11176	0.0974511		0.0818212	0.0422248
	4th_instar_larvae	2.09934	797.229		0.424903	2.76733
	pupae_male	3.7303	186.732		146.596	206.243
	pupae_female	4380.32	7072.55		1.8163	1.47447
	*Gamez et al., 2020 - values in Transcripts Per Million (TPM)
	**Matthews et al., 2018 values in Transcripts Per Million (TPM)
