# Supplementary material for: Eliminating Mosquitoes with Precision Guided Sterile Males
Source: Research Square preprint supplement (doi:10.21203/rs.3.rs-367110/v1), 2021-04-05
Supplement: Supplementary file 2 [file Table S10 - Nanopore Coverage Means.xlsx]

## Sheet: Sheet1
	Table S12 - Coverage Means
	ID	length	bases_covered	mean_coverage	order	normalized_mean_coverage	order_by_size	cum_length	cum_length_percent
	NC_035108.1	474425716	2662673136	5.61241	127	1.02132	1	474425716	37.1021
	NC_035109.1	409777670	2240782245	5.46829	141	0.995089	2	884203386	69.1485
	NC_035107.1	310827022	1882323727	6.05586	98	1.10201	3	1195030408	93.4565
	NW_018736280.1	640510	3028919	4.72892	218	0.860543	4	1195670918	93.5065
	NW_018736492.1	541992	1617302	2.984	553	0.543011	5	1196212910	93.5489
	NW_018736634.1	428575	2179055	5.08442	174	0.925235	6	1196641485	93.5824
	NW_018735130.1	351526	1718987	4.89007	196	0.889868	7	1196993011	93.6099
	NW_018736174.1	326068	10654946	32.6771	6	5.94639	8	1197319079	93.6354
	NW_018735222.1	322943	1263521	3.91252	337	0.711979	9	1197642022	93.6607
	NW_018734878.1	300825	1702399	5.6591	124	1.02981	10	1197942847	93.6842
	NW_018736624.1	300164	974449	3.24639	484	0.59076	11	1198243011	93.7077
	NW_018735895.1	274556	597068	2.17467	854	0.395734	12	1198517567	93.7292
	NW_018735295.1	251237	556271	2.21413	838	0.402915	13	1198768804	93.7488
	NW_018734604.1	247994	1228225	4.95264	186	0.901254	14	1199016798	93.7682
	NW_018736130.1	235911	860959	3.64951	394	0.664118	15	1199252709	93.7867
	NW_018736385.1	231228	1887778	8.16414	35	1.48567	16	1199483937	93.8047
	NW_018734504.1	226063	609617	2.69667	655	0.490725	17	1199710000	93.8224
	NW_018734873.1	206929	948388	4.58316	243	0.834018	18	1199916929	93.8386
	NW_018736481.1	204549	655114	3.20272	495	0.582814	19	1200121478	93.8546
	NW_018735489.1	196695	808565	4.11076	302	0.748053	20	1200318173	93.87
	NW_018736485.1	193134	565718	2.92915	567	0.53303	21	1200511307	93.8851
	NW_018735371.1	189715	756894	3.98964	329	0.726012	22	1200701022	93.8999
	NW_018736448.1	187149	589236	3.14849	512	0.572944	23	1200888171	93.9146
	NW_018736606.1	186412	331857	1.78023	1039	0.323957	24	1201074583	93.9291
	NW_018734854.1	183405	670322	3.65487	393	0.665094	25	1201257988	93.9435
	NW_018734898.1	177013	1109761	6.26938	88	1.14087	26	1201435001	93.9573
	NW_018734671.1	176793	832895	4.71113	225	0.857306	27	1201611794	93.9711
	NW_018736423.1	176234	650713	3.69232	381	0.671909	28	1201788028	93.9849
	NW_018736247.1	172510	648204	3.75749	366	0.683767	29	1201960538	93.9984
	NW_018735483.1	170970	257669	1.5071	1206	0.274254	30	1202131508	94.0118
	NW_018736689.1	170468	494111	2.89856	576	0.527463	31	1202301976	94.0251
	NW_018736530.1	163096	373874	2.29236	803	0.41715	32	1202465072	94.0379
	NW_018734587.1	159596	690399	4.32592	275	0.787207	33	1202624668	94.0504
	NW_018735347.1	156082	843095	5.40162	145	0.982957	34	1202780750	94.0626
	NW_018734707.1	154559	713138	4.61402	239	0.839634	35	1202935309	94.0747
	NW_018734533.1	153870	551728	3.58568	405	0.652502	36	1203089179	94.0867
	NW_018734557.1	153003	333021	2.17657	851	0.396079	37	1203242182	94.0987
	NW_018736338.1	152424	768856	5.04419	178	0.917915	38	1203394606	94.1106
	NW_018735050.1	148398	496724	3.34724	462	0.609113	39	1203543004	94.1222
	NW_018736438.1	146225	261635	1.78926	1033	0.3256	40	1203689229	94.1336
	NW_018736317.1	144620	561988	3.88596	344	0.707146	41	1203833849	94.1449
	NW_018736177.1	143028	369637	2.58437	699	0.470289	42	1203976877	94.1561
	NW_018735241.1	142259	532291	3.7417	371	0.680895	43	1204119136	94.1672
	NW_018734461.1	140198	183006	1.30534	1335	0.237539	44	1204259334	94.1782
	NW_018735065.1	139228	481042	3.45507	433	0.628734	45	1204398562	94.1891
	NW_018735379.1	138289	440566	3.18584	501	0.579741	46	1204536851	94.1999
	NW_018734656.1	135003	684761	5.07219	175	0.92301	47	1204671854	94.2105
	NW_018736128.1	133228	647769	4.86211	198	0.88478	48	1204805082	94.2209
	NW_018736173.1	131751	537638	4.08071	306	0.742586	49	1204936833	94.2312
	NW_018734819.1	129821	694683	5.35108	151	0.973761	50	1205066654	94.2413
	NW_018736074.1	129596	357300	2.75703	630	0.501709	51	1205196250	94.2515
	NW_018736211.1	129287	952754	7.36929	50	1.34102	52	1205325537	94.2616
	NW_018736045.1	127810	646226	5.05615	176	0.92009	53	1205453347	94.2716
	NW_018736115.1	127642	394248	3.0887	529	0.562065	54	1205580989	94.2816
	NW_018736516.1	124708	236228	1.89425	976	0.344705	55	1205705697	94.2913
	NW_018735917.1	124220	179785	1.44731	1242	0.263374	56	1205829917	94.301
	NW_018734782.1	121724	415805	3.41597	443	0.621619	57	1205951641	94.3105
	NW_018734439.1	117223	553357	4.72055	221	0.85902	58	1206068864	94.3197
	NW_018735627.1	114543	541021	4.7233	220	0.85952	59	1206183407	94.3287
	NW_018736437.1	111889	434816	3.88614	343	0.707178	60	1206295296	94.3374
	NW_018734955.1	111218	642653	5.77832	114	1.05151	61	1206406514	94.3461
	NW_018734629.1	110094	373668	3.39408	449	0.617636	62	1206516608	94.3547
	NW_018734497.1	108739	324167	2.98115	556	0.542493	63	1206625347	94.3632
	NW_018736240.1	107667	465823	4.32652	274	0.787316	64	1206733014	94.3716
	NW_018736259.1	107032	210762	1.96915	946	0.358335	65	1206840046	94.38
	NW_018735954.1	107000	257523	2.40676	760	0.437969	66	1206947046	94.3884
	NW_018735982.1	106865	284952	2.66647	670	0.485229	67	1207053911	94.3967
	NW_018734928.1	106838	585347	5.47883	139	0.997007	68	1207160749	94.4051
	NW_018736618.1	106601	600017	5.62862	125	1.02427	69	1207267350	94.4134
	NW_018736081.1	104686	364968	3.48631	428	0.63442	70	1207372036	94.4216
	NW_018736147.1	104027	557066	5.35501	150	0.974476	71	1207476063	94.4298
	NW_018735041.1	103273	268139	2.59641	690	0.47248	72	1207579336	94.4378
	NW_018736002.1	102390	341269	3.33303	466	0.606527	73	1207681726	94.4458
	NW_018734509.1	101610	357485	3.51821	421	0.640224	74	1207783336	94.4538
	NW_018735697.1	101110	268492	2.65544	674	0.483223	75	1207884446	94.4617
	NW_018736581.1	100923	500233	4.95658	185	0.901972	76	1207985369	94.4696
	NW_018734659.1	100673	179956	1.78753	1035	0.325285	77	1208086042	94.4775
	NW_018734686.1	100173	230999	2.306	796	0.419633	78	1208186215	94.4853
	NW_018735434.1	98894	368016	3.72132	375	0.677185	79	1208285109	94.493
	NW_018736558.1	97849	425559	4.34914	271	0.791433	80	1208382958	94.5007
	NW_018734480.1	97565	362877	3.71934	376	0.676824	81	1208480523	94.5083
	NW_018736196.1	97305	649829	6.67827	68	1.21528	82	1208577828	94.5159
	NW_018734774.1	96511	144724	1.49956	1209	0.272882	83	1208674339	94.5235
	NW_018735391.1	95131	2302765	24.2063	8	4.40492	84	1208769470	94.5309
	NW_018735061.1	94915	455769	4.80186	203	0.873817	85	1208864385	94.5383
	NW_018735927.1	94308	296617	3.14519	514	0.572345	86	1208958693	94.5457
	NW_018735883.1	92688	238987	2.5784	700	0.469204	87	1209051381	94.553
	NW_018735170.1	92064	226409	2.45926	743	0.447522	88	1209143445	94.5602
	NW_018735251.1	91821	390921	4.25742	288	0.774743	89	1209235266	94.5673
	NW_018736277.1	91629	829232	9.04989	28	1.64685	90	1209326895	94.5745
	NW_018734818.1	91590	367008	4.00708	318	0.729186	91	1209418485	94.5817
	NW_018734583.1	89935	331803	3.68936	383	0.67137	92	1209508420	94.5887
	NW_018735442.1	89693	223905	2.49635	735	0.454272	93	1209598113	94.5957
	NW_018735078.1	89305	564983	6.32644	85	1.15125	94	1209687418	94.6027
	NW_018734513.1	89093	587194	6.5908	72	1.19936	95	1209776511	94.6097
	NW_018734645.1	88678	94227	1.06257	1533	0.193362	96	1209865189	94.6166
	NW_018735906.1	87893	73727	0.838827	1704	0.152645	97	1209953082	94.6235
	NW_018736379.1	87115	251965	2.89233	580	0.52633	98	1210040197	94.6303
	NW_018734940.1	87083	393808	4.52221	250	0.822928	99	1210127280	94.6371
	NW_018734968.1	87070	275695	3.16636	504	0.576197	100	1210214350	94.6439
	NW_018735850.1	86475	441444	5.10487	171	0.928957	101	1210300825	94.6507
	NW_018735210.1	86258	994317	11.5272	17	2.09766	102	1210387083	94.6574
	NW_018736571.1	85242	166763	1.95635	950	0.356006	103	1210472325	94.6641
	NW_018734996.1	84697	69050	0.815259	1733	0.148356	104	1210557022	94.6707
	NW_018734885.1	84091	121608	1.44615	1244	0.263162	105	1210641113	94.6773
	NW_018736692.1	83687	129473	1.54711	1181	0.281535	106	1210724800	94.6838
	NW_018735154.1	83431	209272	2.50832	729	0.456451	107	1210808231	94.6903
	NW_018736348.1	83366	427791	5.13148	168	0.933799	108	1210891597	94.6969
	NW_018734977.1	82317	101388	1.23168	1379	0.224134	109	1210973914	94.7033
	NW_018736612.1	82223	377293	4.58866	242	0.835018	110	1211056137	94.7097
	NW_018736162.1	82055	292223	3.56131	413	0.648067	111	1211138192	94.7162
	NW_018734805.1	81937	181361	2.21342	839	0.402786	112	1211220129	94.7226
	NW_018734601.1	81146	270715	3.33615	465	0.607094	113	1211301275	94.7289
	NW_018734835.1	81083	219717	2.70978	649	0.493111	114	1211382358	94.7352
	NW_018734695.1	80973	208642	2.57669	702	0.468891	115	1211463331	94.7416
	NW_018736432.1	80719	119670	1.48255	1216	0.269786	116	1211544050	94.7479
	NW_018734697.1	80565	287675	3.57072	408	0.64978	117	1211624615	94.7542
	NW_018735312.1	80301	102891	1.28132	1349	0.233167	118	1211704916	94.7605
	NW_018734542.1	80016	193495	2.4182	756	0.440052	119	1211784932	94.7667
	NW_018734685.1	79989	392400	4.90567	193	0.892708	120	1211864921	94.773
	NW_018734863.1	79704	293211	3.67875	387	0.669439	121	1211944625	94.7792
	NW_018736189.1	79414	146202	1.84101	1003	0.335017	122	1212024039	94.7854
	NW_018734779.1	79256	233720	2.94893	562	0.536629	123	1212103295	94.7916
	NW_018736101.1	79242	412551	5.20622	161	0.947399	124	1212182537	94.7978
	NW_018735609.1	79205	290121	3.66291	389	0.666557	125	1212261742	94.804
	NW_018736643.1	78688	247413	3.14423	515	0.572169	126	1212340430	94.8102
	NW_018735433.1	78271	448621	5.73164	119	1.04301	127	1212418701	94.8163
	NW_018735817.1	77872	140807	1.80819	1021	0.329044	128	1212496573	94.8224
	NW_018736153.1	77862	215354	2.76584	626	0.503313	129	1212574435	94.8285
	NW_018736591.1	77603	379894	4.89535	195	0.890829	130	1212652038	94.8345
	NW_018734475.1	77551	172055	2.2186	833	0.40373	131	1212729589	94.8406
	NW_018734483.1	77531	238782	3.07983	531	0.56045	132	1212807120	94.8467
	NW_018736672.1	77285	88651	1.14707	1452	0.208737	133	1212884405	94.8527
	NW_018734436.1	77204	103602	1.34193	1304	0.244196	134	1212961609	94.8588
	NW_018734563.1	76832	86413	1.1247	1476	0.204667	135	1213038441	94.8648
	NW_018736064.1	76727	220032	2.86773	587	0.521853	136	1213115168	94.8708
	NW_018736637.1	76630	98011	1.27902	1354	0.232748	137	1213191798	94.8768
	NW_018735005.1	76467	301794	3.94672	332	0.718203	138	1213268265	94.8827
	NW_018735164.1	75816	169681	2.23806	826	0.407271	139	1213344081	94.8887
	NW_018734466.1	75352	172411	2.28807	804	0.416371	140	1213419433	94.8946
	NW_018736654.1	74998	166683	2.2225	829	0.404438	141	1213494431	94.9004
	NW_018736579.1	74969	154420	2.05978	914	0.374828	142	1213569400	94.9063
	NW_018736255.1	74874	213243	2.84802	594	0.518268	143	1213644274	94.9121
	NW_018734543.1	74779	169798	2.27066	814	0.413203	144	1213719053	94.918
	NW_018734836.1	74703	449868	6.02209	100	1.09587	145	1213793756	94.9238
	NW_018734437.1	74641	195624	2.62087	682	0.476931	146	1213868397	94.9297
	NW_018734562.1	74389	113386	1.52423	1192	0.277371	147	1213942786	94.9355
	NW_018734978.1	74389	48431	0.651051	1903	0.118475	148	1214017175	94.9413
	NW_018736703.1	74357	252870	3.40076	447	0.618851	149	1214091532	94.9471
	NW_018735861.1	74086	138907	1.87494	986	0.341192	150	1214165618	94.9529
	NW_018735910.1	74073	179747	2.42662	749	0.441583	151	1214239691	94.9587
	NW_018734585.1	73963	92126	1.24557	1370	0.226662	152	1214313654	94.9645
	NW_018735344.1	73820	109007	1.47666	1218	0.268714	153	1214387474	94.9703
	NW_018736700.1	73687	179295	2.4332	748	0.44278	154	1214461161	94.976
	NW_018734591.1	73687	105090	1.42617	1260	0.259526	155	1214534848	94.9818
	NW_018735100.1	73617	43105	0.585531	1973	0.106552	156	1214608465	94.9875
	NW_018735032.1	73476	115417	1.57081	1167	0.285848	157	1214681941	94.9933
	NW_018735465.1	73470	186500	2.53845	719	0.461933	158	1214755411	94.999
	NW_018735911.1	72980	250030	3.42601	440	0.623446	159	1214828391	95.0047
	NW_018736633.1	72663	260720	3.58807	404	0.652938	160	1214901054	95.0104
	NW_018734600.1	72607	32773	0.451375	2079	0.0821388	161	1214973661	95.0161
	NW_018734669.1	72539	457017	6.30029	86	1.14649	162	1215046200	95.0218
	NW_018735102.1	72494	497221	6.85879	64	1.24812	163	1215118694	95.0274
	NW_018734944.1	72394	245143	3.38623	452	0.616208	164	1215191088	95.0331
	NW_018736158.1	72177	148950	2.06368	913	0.375537	165	1215263265	95.0388
	NW_018736099.1	71963	76507	1.06314	1532	0.193465	166	1215335228	95.0444
	NW_018735059.1	71943	464708	6.45939	78	1.17544	167	1215407171	95.05
	NW_018734966.1	71159	294553	4.13936	299	0.753259	168	1215478330	95.0556
	NW_018735291.1	71033	561097	7.8991	36	1.43744	169	1215549363	95.0611
	NW_018734730.1	70813	121868	1.72098	1079	0.313175	170	1215620176	95.0667
	NW_018736391.1	70572	333603	4.72713	219	0.860217	171	1215690748	95.0722
	NW_018736044.1	70428	235766	3.34762	461	0.609181	172	1215761176	95.0777
	NW_018736249.1	70238	333044	4.74165	214	0.86286	173	1215831414	95.0832
	NW_018736311.1	70127	195321	2.78525	620	0.506844	174	1215901541	95.0887
	NW_018735389.1	69878	534428	7.64802	42	1.39174	175	1215971419	95.0941
	NW_018736172.1	69440	187758	2.70389	652	0.492039	176	1216040859	95.0996
	NW_018734843.1	69422	145818	2.10046	884	0.38223	177	1216110281	95.105
	NW_018736449.1	69276	162244	2.34199	781	0.426183	178	1216179557	95.1104
	NW_018734725.1	69087	14586	0.211125	2254	0.0384194	179	1216248644	95.1158
	NW_018734908.1	69083	217605	3.14991	511	0.573203	180	1216317727	95.1212
	NW_018736555.1	69021	116250	1.68427	1108	0.306494	181	1216386748	95.1266
	NW_018735030.1	69017	142522	2.06503	911	0.375782	182	1216455765	95.132
	NW_018735001.1	68925	191458	2.77777	621	0.505484	183	1216524690	95.1374
	NW_018734677.1	68867	120192	1.74528	1059	0.317596	184	1216593557	95.1428
	NW_018734817.1	68860	601378	8.73334	30	1.58925	185	1216662417	95.1482
	NW_018736656.1	68768	161980	2.35546	774	0.428633	186	1216731185	95.1535
	NW_018735432.1	68732	31968	0.465111	2064	0.0846383	187	1216799917	95.1589
	NW_018735002.1	68715	182542	2.65651	673	0.483417	188	1216868632	95.1643
	NW_018735913.1	68709	124562	1.81289	1018	0.3299	189	1216937341	95.1697
	NW_018736290.1	68640	149202	2.17369	855	0.395556	190	1217005981	95.175
	NW_018736018.1	68480	143001	2.08822	899	0.380002	191	1217074461	95.1804
	NW_018735053.1	68329	142978	2.09249	892	0.380781	192	1217142790	95.1857
	NW_018735138.1	68236	423880	6.21197	95	1.13042	193	1217211026	95.1911
	NW_018736602.1	68153	237994	3.49205	426	0.635465	194	1217279179	95.1964
	NW_018735439.1	67869	180067	2.65316	675	0.482807	195	1217347048	95.2017
	NW_018736556.1	67654	257259	3.80257	356	0.691971	196	1217414702	95.207
	NW_018736352.1	67549	786276	11.6401	16	2.1182	197	1217482251	95.2123
	NW_018736599.1	67376	94726	1.40593	1272	0.255844	198	1217549627	95.2176
	NW_018734810.1	67323	244032	3.62479	398	0.65962	199	1217616950	95.2228
	NW_018734840.1	66942	288579	4.31088	281	0.784471	200	1217683892	95.2281
	NW_018736322.1	66921	34874	0.521122	2022	0.0948309	201	1217750813	95.2333
	NW_018735212.1	66842	252880	3.78325	362	0.688455	202	1217817655	95.2385
	NW_018736332.1	66704	155292	2.32808	789	0.423651	203	1217884359	95.2437
	NW_018736106.1	66384	202378	3.0486	539	0.554767	204	1217950743	95.2489
	NW_018736269.1	66233	366195	5.52889	134	1.00612	205	1218016976	95.2541
	NW_018734907.1	66192	233411	3.52627	419	0.641692	206	1218083168	95.2593
	NW_018735730.1	66188	78127	1.18038	1425	0.214799	207	1218149356	95.2645
	NW_018736461.1	66095	265103	4.01094	317	0.729889	208	1218215451	95.2696
	NW_018735182.1	66022	471906	7.14771	54	1.3007	209	1218281473	95.2748
	NW_018735960.1	65799	155178	2.35836	773	0.429162	210	1218347272	95.2799
	NW_018736427.1	65760	112924	1.71721	1080	0.312489	211	1218413032	95.2851
	NW_018735262.1	65530	269386	4.11088	301	0.748076	212	1218478562	95.2902
	NW_018734609.1	65287	180328	2.76208	627	0.502628	213	1218543849	95.2953
	NW_018736390.1	65130	119217	1.83045	1005	0.333095	214	1218608979	95.3004
	NW_018734592.1	65087	189205	2.90696	573	0.528992	215	1218674066	95.3055
	NW_018734613.1	64887	259209	3.99478	326	0.726947	216	1218738953	95.3106
	NW_018734801.1	64787	299437	4.62187	238	0.841062	217	1218803740	95.3156
	NW_018735422.1	64787	143830	2.22004	832	0.403992	218	1218868527	95.3207
	NW_018736120.1	64539	308482	4.77978	207	0.869798	219	1218933066	95.3257
	NW_018736490.1	64527	139790	2.16638	862	0.394226	220	1218997593	95.3308
	NW_018736053.1	64444	369363	5.73153	120	1.04299	221	1219062037	95.3358
	NW_018736368.1	64369	140318	2.1799	850	0.396686	222	1219126406	95.3409
	NW_018736248.1	63991	170671	2.66711	668	0.485346	223	1219190397	95.3459
	NW_018736171.1	63991	155195	2.42526	750	0.441336	224	1219254388	95.3509
	NW_018734764.1	63815	249647	3.91204	338	0.711892	225	1219318203	95.3559
	NW_018734982.1	63708	210128	3.2983	475	0.600206	226	1219381911	95.3608
	NW_018736098.1	63362	315040	4.97207	182	0.904789	227	1219445273	95.3658
	NW_018736144.1	63135	112237	1.77773	1040	0.323502	228	1219508408	95.3707
	NW_018734608.1	63112	268107	4.24811	291	0.773049	229	1219571520	95.3757
	NW_018735205.1	62982	44571	0.707678	1848	0.128779	230	1219634502	95.3806
	NW_018734951.1	62911	104594	1.66257	1126	0.302546	231	1219697413	95.3855
	NW_018736160.1	62881	196550	3.12575	519	0.568806	232	1219760294	95.3904
	NW_018734759.1	62695	111869	1.78434	1038	0.324704	233	1219822989	95.3953
	NW_018735296.1	62509	361067	5.77624	115	1.05113	234	1219885498	95.4002
	NW_018735040.1	62458	4357387	69.7651	4	12.6955	235	1219947956	95.4051
	NW_018735872.1	62429	92068	1.47476	1220	0.268369	236	1220010385	95.41
	NW_018735349.1	62338	155883	2.50061	732	0.455047	237	1220072723	95.4149
	NW_018735183.1	62026	248417	4.00505	321	0.728816	238	1220134749	95.4197
	NW_018736318.1	61952	109940	1.7746	1043	0.322932	239	1220196701	95.4246
	NW_018736346.1	61749	41174	0.666796	1889	0.12134	240	1220258450	95.4294
	NW_018734738.1	61727	213712	3.46221	431	0.630035	241	1220320177	95.4342
	NW_018736336.1	61714	175957	2.85117	593	0.51884	242	1220381891	95.439
	NW_018735323.1	61640	36553	0.593008	1969	0.107912	243	1220443531	95.4439
	NW_018735266.1	61633	140134	2.27368	811	0.413753	244	1220505164	95.4487
	NW_018734820.1	61606	177697	2.88441	582	0.524889	245	1220566770	95.4535
	NW_018735248.1	61561	275553	4.4761	255	0.814536	246	1220628331	95.4583
	NW_018735411.1	61509	169076	2.7488	636	0.500212	247	1220689840	95.4631
	NW_018736206.1	61248	302149	4.93321	189	0.897718	248	1220751088	95.4679
	NW_018734442.1	60997	283300	4.64449	233	0.845179	249	1220812085	95.4727
	NW_018736219.1	60958	859630	14.102	11	2.56621	250	1220873043	95.4775
	NW_018735068.1	60921	75705	1.24267	1371	0.226135	251	1220933964	95.4822
	NW_018735221.1	60757	170278	2.80261	611	0.510003	252	1220994721	95.487
	NW_018734924.1	60698	266646	4.39299	264	0.799413	253	1221055419	95.4917
	NW_018734981.1	60604	116880	1.92859	961	0.350953	254	1221116023	95.4965
	NW_018734935.1	60555	124101	2.04939	917	0.372937	255	1221176578	95.5012
	NW_018735224.1	60477	199623	3.30081	474	0.600663	256	1221237055	95.5059
	NW_018735949.1	60355	321718	5.33043	153	0.970002	257	1221297410	95.5106
	NW_018736645.1	60312	79285	1.31458	1325	0.23922	258	1221357722	95.5154
	NW_018734787.1	60034	228046	3.79861	358	0.691251	259	1221417756	95.5201
	NW_018734698.1	59996	173882	2.89823	577	0.527403	260	1221477752	95.5247
	NW_018734874.1	59894	65629	1.09575	1511	0.199399	261	1221537646	95.5294
	NW_018734811.1	59888	193564	3.2321	487	0.58816	262	1221597534	95.5341
	NW_018736343.1	59879	83369	1.39229	1278	0.253362	263	1221657413	95.5388
	NW_018735969.1	59857	19986	0.333896	2185	0.0607605	264	1221717270	95.5435
	NW_018735268.1	59762	450337	7.53551	44	1.37127	265	1221777032	95.5482
	NW_018735049.1	59730	85911	1.43832	1254	0.261738	266	1221836762	95.5528
	NW_018734590.1	59550	99721	1.67458	1117	0.30473	267	1221896312	95.5575
	NW_018735365.1	59534	71543	1.20172	1407	0.218682	268	1221955846	95.5621
	NW_018734719.1	59481	51609	0.867655	1676	0.157891	269	1222015327	95.5668
	NW_018735427.1	59420	152980	2.57455	705	0.468503	270	1222074747	95.5714
	NW_018735022.1	59399	167306	2.81665	607	0.512558	271	1222134146	95.5761
	NW_018735479.1	59215	134004	2.26301	819	0.41181	272	1222193361	95.5807
	NW_018734900.1	59183	241777	4.08524	305	0.74341	273	1222252544	95.5853
	NW_018736471.1	59160	164114	2.77407	622	0.50481	274	1222311704	95.59
	NW_018735319.1	58992	79196	1.34249	1302	0.244298	275	1222370696	95.5946
	NW_018736330.1	58952	49777	0.844365	1700	0.153653	276	1222429648	95.5992
	NW_018735194.1	58839	123443	2.09798	886	0.381779	277	1222488487	95.6038
	NW_018735163.1	58770	77156	1.31285	1326	0.238905	278	1222547257	95.6084
	NW_018735431.1	58704	115721	1.97126	945	0.35872	279	1222605961	95.613
	NW_018734527.1	58688	94269	1.60627	1151	0.292301	280	1222664649	95.6176
	NW_018736015.1	58653	238409	4.06474	310	0.739679	281	1222723302	95.6222
	NW_018736458.1	58419	271366	4.64517	232	0.845302	282	1222781721	95.6267
	NW_018734615.1	58287	194236	3.33241	467	0.606413	283	1222840008	95.6313
	NW_018736301.1	58256	199255	3.42033	442	0.622414	284	1222898264	95.6358
	NW_018734552.1	58243	81088	1.39224	1279	0.253352	285	1222956507	95.6404
	NW_018736447.1	58217	101367	1.74119	1064	0.316853	286	1223014724	95.6449
	NW_018734766.1	58150	257178	4.42267	257	0.804813	287	1223072874	95.6495
	NW_018735307.1	58055	75011	1.29207	1340	0.235123	288	1223130929	95.654
	NW_018736536.1	57940	277855	4.79556	204	0.872671	289	1223188869	95.6586
	NW_018734526.1	57908	174235	3.00882	546	0.547529	290	1223246777	95.6631
	NW_018736100.1	57807	87707	1.51724	1198	0.276099	291	1223304584	95.6676
	NW_018735970.1	57578	137093	2.381	767	0.433281	292	1223362162	95.6721
	NW_018736359.1	57548	135069	2.34707	779	0.427106	293	1223419710	95.6766
	NW_018734635.1	57435	114135	1.9872	939	0.36162	294	1223477145	95.6811
	NW_018736678.1	57281	125486	2.19071	845	0.398653	295	1223534426	95.6856
	NW_018734545.1	57264	187275	3.27038	477	0.595126	296	1223591690	95.6901
	NW_018734816.1	56630	87979	1.55358	1177	0.282711	297	1223648320	95.6945
	NW_018736139.1	56628	43503	0.768224	1790	0.139797	298	1223704948	95.6989
	NW_018735131.1	56518	74169	1.31231	1327	0.238807	299	1223761466	95.7033
	NW_018735011.1	56407	135949	2.41014	758	0.438585	300	1223817873	95.7078
	NW_018734693.1	56242	59400	1.05615	1539	0.192192	301	1223874115	95.7122
	NW_018734880.1	56206	214383	3.81424	351	0.694094	302	1223930321	95.7166
	NW_018735209.1	56146	149815	2.66831	667	0.485565	303	1223986467	95.7209
	NW_018734718.1	55932	291725	5.21571	160	0.949126	304	1224042399	95.7253
	NW_018736261.1	55903	42133	0.75368	1808	0.137151	305	1224098302	95.7297
	NW_018734980.1	55869	219886	3.93574	335	0.716205	306	1224154171	95.7341
	NW_018735469.1	55728	92053	1.65183	1131	0.30059	307	1224209899	95.7384
	NW_018736337.1	55669	143295	2.57405	706	0.468412	308	1224265568	95.7428
	NW_018736170.1	55569	144579	2.60179	688	0.47346	309	1224321137	95.7471
	NW_018734976.1	55521	171350	3.08622	530	0.561613	310	1224376658	95.7515
	NW_018735051.1	55507	102241	1.84195	1002	0.335188	311	1224432165	95.7558
	NW_018735150.1	55498	206799	3.72624	373	0.678081	312	1224487663	95.7601
	NW_018734846.1	55314	105923	1.91494	967	0.34847	313	1224542977	95.7645
	NW_018734484.1	55137	287702	5.21795	159	0.949534	314	1224598114	95.7688
	NW_018734800.1	55089	61260	1.11202	1493	0.202359	315	1224653203	95.7731
	NW_018736506.1	55088	94088	1.70796	1087	0.310805	316	1224708291	95.7774
	NW_018735003.1	54943	16889	0.307391	2199	0.0559374	317	1224763234	95.7817
	NW_018736524.1	54919	46302	0.843096	1701	0.153422	318	1224818153	95.786
	NW_018734657.1	54892	196000	3.57065	409	0.649767	319	1224873045	95.7903
	NW_018736380.1	54835	103042	1.87913	982	0.341954	320	1224927880	95.7946
	NW_018735362.1	54813	156758	2.85987	590	0.520423	321	1224982693	95.7989
	NW_018734412.1	54773	75780	1.38353	1285	0.251767	322	1225037466	95.8031
	NW_018735043.1	54747	167262	3.05518	538	0.555965	323	1225092213	95.8074
	NW_018735463.1	54728	71320	1.30317	1336	0.237144	324	1225146941	95.8117
	NW_018734464.1	54713	82772	1.51284	1202	0.275298	325	1225201654	95.816
	NW_018736681.1	54609	44867	0.821604	1724	0.149511	326	1225256263	95.8202
	NW_018736296.1	54540	160682	2.94613	563	0.536121	327	1225310803	95.8245
	NW_018735987.1	54449	78351	1.43898	1251	0.261858	328	1225365252	95.8288
	NW_018736025.1	54415	244450	4.49233	253	0.817489	329	1225419667	95.833
	NW_018734621.1	54225	337784	6.2293	93	1.13357	330	1225473892	95.8373
	NW_018734551.1	54110	114721	2.12014	878	0.385812	331	1225528002	95.8415
	NW_018735114.1	54074	78120	1.44469	1247	0.262896	332	1225582076	95.8457
	NW_018736278.1	54004	60450	1.11936	1484	0.203695	333	1225636080	95.8499
	NW_018735488.1	53982	182363	3.37822	454	0.61475	334	1225690062	95.8542
	NW_018734866.1	53864	48823	0.906412	1650	0.164944	335	1225743926	95.8584
	NW_018735939.1	53778	82229	1.52905	1189	0.278247	336	1225797704	95.8626
	NW_018736075.1	53762	197778	3.67877	386	0.669442	337	1225851466	95.8668
	NW_018734853.1	53704	138331	2.5758	703	0.468731	338	1225905170	95.871
	NW_018735139.1	53467	96386	1.80272	1026	0.328049	339	1225958637	95.8752
	NW_018734684.1	53453	33368	0.624249	1942	0.113597	340	1226012090	95.8794
	NW_018734434.1	53421	91124	1.70577	1090	0.310407	341	1226065511	95.8835
	NW_018736161.1	53289	457232	8.58023	31	1.56138	342	1226118800	95.8877
	NW_018735243.1	53249	145214	2.72707	642	0.496258	343	1226172049	95.8919
	NW_018735919.1	53104	90652	1.70707	1088	0.310642	344	1226225153	95.896
	NW_018736364.1	53057	104249	1.96485	948	0.357553	345	1226278210	95.9002
	NW_018736328.1	52931	147774	2.79182	614	0.508041	346	1226331141	95.9043
	NW_018735957.1	52799	98195	1.85979	994	0.338434	347	1226383940	95.9084
	NW_018736009.1	52791	63334	1.19971	1410	0.218317	348	1226436731	95.9126
	NW_018735076.1	52789	225027	4.26276	287	0.775714	349	1226489520	95.9167
	NW_018736167.1	52778	210660	3.99144	328	0.72634	350	1226542298	95.9208
	NW_018736457.1	52715	149434	2.83475	600	0.515853	351	1226595013	95.9249
	NW_018734501.1	52694	289308	5.49034	138	0.999102	352	1226647707	95.9291
	NW_018734860.1	52674	70018	1.32927	1312	0.241893	353	1226700381	95.9332
	NW_018736498.1	52658	210899	4.00507	320	0.728821	354	1226753039	95.9373
	NW_018736093.1	52575	90216	1.71595	1081	0.312259	355	1226805614	95.9414
	NW_018735937.1	52454	148249	2.82627	602	0.514309	356	1226858068	95.9455
	NW_018736345.1	52173	54731	1.04903	1547	0.190897	357	1226910241	95.9496
	NW_018734619.1	51697	248424	4.80539	202	0.874458	358	1226961938	95.9536
	NW_018735368.1	51669	145880	2.82336	604	0.513779	359	1227013607	95.9577
	NW_018735220.1	51636	87296	1.6906	1101	0.307647	360	1227065243	95.9617
	NW_018734731.1	51608	138361	2.681	664	0.487874	361	1227116851	95.9658
	NW_018736312.1	51567	167293	3.24419	485	0.590359	362	1227168418	95.9698
	NW_018735795.1	51490	200968	3.90305	340	0.710256	363	1227219908	95.9738
	NW_018735461.1	51444	150611	2.92767	569	0.532761	364	1227271352	95.9778
	NW_018734915.1	51294	147461	2.87482	585	0.523144	365	1227322646	95.9818
	NW_018734925.1	51293	67181	1.30975	1331	0.238341	366	1227373939	95.9859
	NW_018734616.1	51187	230475	4.50261	251	0.81936	367	1227425126	95.9899
	NW_018735996.1	51001	164455	3.22454	491	0.586785	368	1227476127	95.9938
	NW_018734936.1	50998	285222	5.59281	130	1.01775	369	1227527125	95.9978
	NW_018734867.1	50765	79459	1.56523	1173	0.284832	370	1227577890	96.0018
	NW_018734859.1	50708	165503	3.26384	479	0.593937	371	1227628598	96.0058
	NW_018735943.1	50617	97072	1.91777	966	0.348986	372	1227679215	96.0097
	NW_018736663.1	50519	97126	1.92256	963	0.349858	373	1227729734	96.0137
	NW_018734682.1	50457	105378	2.08847	898	0.380049	374	1227780191	96.0176
	NW_018735405.1	50366	123288	2.44784	744	0.445445	375	1227830557	96.0216
	NW_018735464.1	50336	301215	5.98409	101	1.08895	376	1227880893	96.0255
	NW_018736594.1	50247	59708	1.18829	1417	0.216239	377	1227931140	96.0294
	NW_018736467.1	50240	218494	4.349	272	0.791408	378	1227981380	96.0334
	NW_018734889.1	50213	234769	4.67546	229	0.850815	379	1228031593	96.0373
	NW_018735178.1	50175	97796	1.9491	953	0.354686	380	1228081768	96.0412
	NW_018736250.1	50042	38798	0.775309	1782	0.141086	381	1228131810	96.0451
	NW_018736091.1	49915	21295	0.426625	2101	0.0776349	382	1228181725	96.049
	NW_018736353.1	49823	156544	3.142	516	0.571765	383	1228231548	96.0529
	NW_018735366.1	49821	100045	2.00809	932	0.365421	384	1228281369	96.0568
	NW_018736584.1	49805	19587	0.393274	2125	0.0715658	385	1228331174	96.0607
	NW_018734870.1	49788	33063	0.664076	1892	0.120845	386	1228380962	96.0646
	NW_018736417.1	49724	166910	3.35673	459	0.610839	387	1228430686	96.0685
	NW_018734827.1	49711	90050	1.81147	1019	0.329641	388	1228480397	96.0724
	NW_018736582.1	49576	49912	1.00678	1583	0.183208	389	1228529973	96.0763
	NW_018734961.1	49431	153877	3.11297	522	0.56648	390	1228579404	96.0801
	NW_018735480.1	49310	111889	2.26909	815	0.412917	391	1228628714	96.084
	NW_018735273.1	49275	105907	2.1493	868	0.391119	392	1228677989	96.0878
	NW_018735945.1	49204	88516	1.79896	1029	0.327365	393	1228727193	96.0917
	NW_018734983.1	49161	177768	3.61604	399	0.658027	394	1228776354	96.0955
	NW_018734459.1	49124	94542	1.92456	962	0.350221	395	1228825478	96.0994
	NW_018735901.1	49100	179674	3.65935	391	0.665908	396	1228874578	96.1032
	NW_018735042.1	49097	202114	4.11663	300	0.749121	397	1228923675	96.1071
	NW_018735171.1	49021	163922	3.34391	463	0.608507	398	1228972696	96.1109
	NW_018735148.1	49016	88183	1.79907	1028	0.327384	399	1229021712	96.1147
	NW_018736184.1	48734	269568	5.53142	133	1.00658	400	1229070446	96.1185
	NW_018735216.1	48668	139098	2.8581	592	0.520101	401	1229119114	96.1223
	NW_018735069.1	48568	152045	3.13056	518	0.569682	402	1229167682	96.1261
	NW_018734490.1	48551	194108	3.99802	325	0.727538	403	1229216233	96.1299
	NW_018736502.1	48518	177545	3.65936	390	0.665911	404	1229264751	96.1337
	NW_018734495.1	48504	87005	1.79377	1031	0.32642	405	1229313255	96.1375
	NW_018735288.1	48435	184529	3.80983	354	0.693292	406	1229361690	96.1413
	NW_018735103.1	48288	115159	2.38484	766	0.43398	407	1229409978	96.1451
	NW_018736037.1	48163	44011	0.913793	1647	0.166287	408	1229458141	96.1489
	NW_018734784.1	48126	212648	4.41857	259	0.804067	409	1229506267	96.1526
	NW_018735048.1	47938	106038	2.21198	840	0.402524	410	1229554205	96.1564
	NW_018735361.1	47932	115800	2.41592	757	0.439636	411	1229602137	96.1601
	NW_018735023.1	47926	202528	4.22585	292	0.768997	412	1229650063	96.1639
	NW_018734666.1	47743	153008	3.20483	494	0.583197	413	1229697806	96.1676
	NW_018735299.1	47690	365208	7.65796	41	1.39355	414	1229745496	96.1713
	NW_018734449.1	47682	66325	1.39099	1280	0.253124	415	1229793178	96.1751
	NW_018734428.1	47651	225535	4.73306	216	0.861296	416	1229840829	96.1788
	NW_018734781.1	47541	93911	1.97537	943	0.359467	417	1229888370	96.1825
	NW_018734617.1	47514	140902	2.96548	561	0.539643	418	1229935884	96.1862
	NW_018734806.1	47489	95346	2.00775	933	0.365359	419	1229983373	96.1899
	NW_018736042.1	47480	27553	0.580307	1974	0.105601	420	1230030853	96.1936
	NW_018734588.1	47431	138930	2.9291	568	0.533021	421	1230078284	96.1973
	NW_018735964.1	47294	74117	1.56715	1172	0.285182	422	1230125578	96.201
	NW_018736004.1	47281	39034	0.825575	1721	0.150234	423	1230172859	96.2047
	NW_018736412.1	47255	130358	2.75861	629	0.501996	424	1230220114	96.2084
	NW_018734498.1	47210	179884	3.81029	353	0.693377	425	1230267324	96.2121
	NW_018736107.1	47155	61680	1.30803	1332	0.238028	426	1230314479	96.2158
	NW_018734620.1	47061	22965	0.487984	2047	0.0888006	427	1230361540	96.2195
	NW_018735456.1	47008	150933	3.21079	493	0.584283	428	1230408548	96.2232
	NW_018734597.1	46994	143601	3.05573	537	0.556065	429	1230455542	96.2269
	NW_018735269.1	46903	446047	9.50999	25	1.73058	430	1230502445	96.2305
	NW_018735900.1	46743	77692	1.66211	1127	0.302462	431	1230549188	96.2342
	NW_018734971.1	46735	85516	1.82981	1007	0.332978	432	1230595923	96.2378
	NW_018735420.1	46721	201953	4.32253	277	0.786591	433	1230642644	96.2415
	NW_018736529.1	46698	94687	2.02765	926	0.36898	434	1230689342	96.2451
	NW_018736434.1	46692	229035	4.90523	194	0.892627	435	1230736034	96.2488
	NW_018734772.1	46641	264404	5.66892	123	1.0316	436	1230782675	96.2524
	NW_018734423.1	46401	62761	1.35258	1297	0.246135	437	1230829076	96.2561
	NW_018735976.1	46377	111606	2.40649	761	0.437921	438	1230875453	96.2597
	NW_018734694.1	46218	83641	1.80971	1020	0.32932	439	1230921671	96.2633
	NW_018736573.1	46210	61527	1.33147	1311	0.242293	440	1230967881	96.2669
	NW_018735833.1	46178	42637	0.923318	1641	0.16802	441	1231014059	96.2705
	NW_018734655.1	46009	69168	1.50336	1208	0.273573	442	1231060068	96.2741
	NW_018735517.1	45994	300141	6.52566	77	1.1875	443	1231106062	96.2777
	NW_018734692.1	45974	69177	1.5047	1207	0.273817	444	1231152036	96.2813
	NW_018736086.1	45899	46016	1.00255	1586	0.182438	445	1231197935	96.2849
	NW_018736499.1	45864	263419	5.74348	117	1.04517	446	1231243799	96.2885
	NW_018736570.1	45820	321080	7.00742	60	1.27517	447	1231289619	96.2921
	NW_018735399.1	45740	105424	2.30485	798	0.419425	448	1231335359	96.2957
	NW_018734660.1	45740	96941	2.11939	879	0.385675	449	1231381099	96.2992
	NW_018735073.1	45690	100873	2.20777	841	0.401758	450	1231426789	96.3028
	NW_018736213.1	45675	93300	2.04269	920	0.371718	451	1231472464	96.3064
	NW_018735039.1	45639	97628	2.13914	875	0.389268	452	1231518103	96.3099
	NW_018734879.1	45595	245589	5.38631	146	0.980172	453	1231563698	96.3135
	NW_018736331.1	45538	87531	1.92215	964	0.349783	454	1231609236	96.3171
	NW_018735485.1	45535	115596	2.53862	718	0.461964	455	1231654771	96.3206
	NW_018735353.1	45465	223392	4.91349	191	0.894131	456	1231700236	96.3242
	NW_018735162.1	45430	147492	3.24658	483	0.590794	457	1231745666	96.3277
	NW_018736038.1	45424	76583	1.68596	1106	0.306802	458	1231791090	96.3313
	NW_018735140.1	45381	178151	3.92567	336	0.714373	459	1231836471	96.3348
	NW_018735818.1	45286	52241	1.15358	1445	0.209922	460	1231881757	96.3384
	NW_018734463.1	45284	97243	2.1474	870	0.390773	461	1231927041	96.3419
	NW_018736610.1	45112	37587	0.833193	1710	0.15162	462	1231972153	96.3455
	NW_018736480.1	45109	112983	2.50467	731	0.455786	463	1232017262	96.349
	NW_018735083.1	45074	19581	0.434419	2089	0.0790532	464	1232062336	96.3525
	NW_018734789.1	44972	36387	0.809103	1736	0.147236	465	1232107308	96.356
	NW_018734455.1	44914	133418	2.97052	560	0.540559	466	1232152222	96.3595
	NW_018734919.1	44880	84710	1.88748	977	0.343473	467	1232197102	96.363
	NW_018734524.1	44855	143228	3.19313	499	0.581069	468	1232241957	96.3666
	NW_018734516.1	44779	48575	1.08477	1521	0.197401	469	1232286736	96.3701
	NW_018734547.1	44758	29361	0.655994	1897	0.119374	470	1232331494	96.3736
	NW_018736557.1	44752	93488	2.08902	897	0.380149	471	1232376246	96.3771
	NW_018734593.1	44689	27081	0.605988	1955	0.110274	472	1232420935	96.3806
	NW_018736470.1	44673	128789	2.88293	583	0.524619	473	1232465608	96.384
	NW_018735378.1	44663	52156	1.16777	1431	0.212504	474	1232510271	96.3875
	NW_018736560.1	44582	138985	3.11751	521	0.567308	475	1232554853	96.391
	NW_018735259.1	44563	49971	1.12136	1481	0.204058	476	1232599416	96.3945
	NW_018734672.1	44555	68255	1.53193	1187	0.278772	477	1232643971	96.398
	NW_018735475.1	44486	117265	2.636	679	0.479685	478	1232688457	96.4015
	NW_018734491.1	44484	46762	1.05121	1543	0.191293	479	1232732941	96.405
	NW_018734986.1	44379	48419	1.09103	1514	0.19854	480	1232777320	96.4084
	NW_018734622.1	44309	60566	1.3669	1294	0.248741	481	1232821629	96.4119
	NW_018734829.1	44303	136244	3.07528	534	0.559622	482	1232865932	96.4154
	NW_018734570.1	44145	110849	2.51102	727	0.456942	483	1232910077	96.4188
	NW_018736566.1	44084	39083	0.886557	1660	0.161331	484	1232954161	96.4223
	NW_018734984.1	44050	54181	1.22999	1381	0.223827	485	1232998211	96.4257
	NW_018734528.1	43930	179785	4.09253	303	0.744737	486	1233042141	96.4291
	NW_018734650.1	43925	308292	7.0186	59	1.27721	487	1233086066	96.4326
	NW_018736194.1	43911	162999	3.71203	378	0.675495	488	1233129977	96.436
	NW_018735902.1	43748	45144	1.03191	1561	0.187781	489	1233173725	96.4394
	NW_018736079.1	43694	141489	3.23818	486	0.589266	490	1233217419	96.4428
	NW_018736114.1	43692	49249	1.12719	1474	0.205119	491	1233261111	96.4463
	NW_018736305.1	43656	103822	2.37818	770	0.432769	492	1233304767	96.4497
	NW_018734926.1	43651	77490	1.77522	1042	0.323044	493	1233348418	96.4531
	NW_018736605.1	43594	59694	1.36932	1291	0.249181	494	1233392012	96.4565
	NW_018734883.1	43497	118089	2.71488	646	0.494038	495	1233435509	96.4599
	NW_018736273.1	43476	91831	2.11222	880	0.384371	496	1233478985	96.4633
	NW_018735438.1	43457	88439	2.03509	922	0.370335	497	1233522442	96.4667
	NW_018735112.1	43422	196522	4.52586	249	0.823592	498	1233565864	96.4701
	NW_018736166.1	43342	126199	2.9117	572	0.529856	499	1233609206	96.4735
	NW_018734770.1	43298	223683	5.16613	165	0.940104	500	1233652504	96.4769
	NW_018735000.1	43218	18220	0.421584	2106	0.0767175	501	1233695722	96.4802
	NW_018735471.1	43130	49763	1.15379	1444	0.209961	502	1233738852	96.4836
	NW_018736549.1	43119	78402	1.81827	1013	0.330879	503	1233781971	96.487
	NW_018734876.1	43013	135846	3.15825	508	0.574722	504	1233824984	96.4904
	NW_018736151.1	42999	201405	4.68395	227	0.852359	505	1233867983	96.4937
	NW_018736131.1	42908	52740	1.22914	1382	0.223672	506	1233910891	96.4971
	NW_018735226.1	42849	157453	3.6746	388	0.668684	507	1233953740	96.5004
	NW_018734506.1	42846	279600	6.5257	76	1.18751	508	1233996586	96.5038
	NW_018736509.1	42798	239740	5.60166	128	1.01936	509	1234039384	96.5071
	NW_018734417.1	42773	185499	4.33682	273	0.789192	510	1234082157	96.5105
	NW_018734537.1	42644	149431	3.50415	424	0.637666	511	1234124801	96.5138
	NW_018736468.1	42643	125447	2.9418	565	0.535332	512	1234167444	96.5171
	NW_018736110.1	42637	104983	2.46225	742	0.448067	513	1234210081	96.5205
	NW_018734606.1	42558	87346	2.0524	915	0.373484	514	1234252639	96.5238
	NW_018735060.1	42551	48039	1.12897	1472	0.205445	515	1234295190	96.5271
	NW_018736666.1	42490	70226	1.65277	1129	0.300761	516	1234337680	96.5305
	NW_018736140.1	42483	317812	7.48092	46	1.36134	517	1234380163	96.5338
	NW_018736572.1	42459	76420	1.79985	1027	0.327528	518	1234422622	96.5371
	NW_018736222.1	42409	56342	1.32854	1314	0.24176	519	1234465031	96.5404
	NW_018734683.1	42405	49273	1.16196	1438	0.211448	520	1234507436	96.5437
	NW_018736554.1	42402	12502	0.294845	2209	0.0536542	521	1234549838	96.547
	NW_018736236.1	42393	69615	1.64213	1139	0.298827	522	1234592231	96.5504
	NW_018735372.1	42323	40448	0.955698	1614	0.173913	523	1234634554	96.5537
	NW_018736111.1	42203	79140	1.87522	985	0.341243	524	1234676757	96.557
	NW_018736676.1	42113	61840	1.46843	1224	0.267217	525	1234718870	96.5603
	NW_018735487.1	42077	150092	3.56708	410	0.649118	526	1234760947	96.5636
	NW_018735462.1	42027	83385	1.98408	941	0.361052	527	1234802974	96.5668
	NW_018736686.1	42026	109634	2.60872	685	0.47472	528	1234845000	96.5701
	NW_018734999.1	41950	151147	3.60303	401	0.655659	529	1234886950	96.5734
	NW_018736210.1	41943	81578	1.94497	954	0.353936	530	1234928893	96.5767
	NW_018735044.1	41920	156941	3.74382	370	0.68128	531	1234970813	96.58
	NW_018734778.1	41885	119204	2.84598	595	0.517896	532	1235012698	96.5832
	NW_018734910.1	41869	152286	3.6372	396	0.661878	533	1235054567	96.5865
	NW_018735117.1	41839	192890	4.61029	240	0.838956	534	1235096406	96.5898
	NW_018736076.1	41832	62168	1.48614	1213	0.270439	535	1235138238	96.5931
	NW_018736283.1	41831	72519	1.73362	1066	0.315474	536	1235180069	96.5963
	NW_018735255.1	41820	26268	0.628121	1934	0.114302	537	1235221889	96.5996
	NW_018734751.1	41770	104868	2.51061	728	0.456866	538	1235263659	96.6029
	NW_018736445.1	41746	61751	1.47921	1217	0.269178	539	1235305405	96.6061
	NW_018734747.1	41722	114200	2.73717	638	0.498094	540	1235347127	96.6094
	NW_018734892.1	41698	146343	3.50959	423	0.638657	541	1235388825	96.6127
	NW_018735160.1	41680	101761	2.44148	746	0.444288	542	1235430505	96.6159
	NW_018734743.1	41658	156601	3.75921	364	0.68408	543	1235472163	96.6192
	NW_018734850.1	41582	68398	1.64489	1137	0.299329	544	1235513745	96.6224
	NW_018736208.1	41478	60266	1.45296	1234	0.264402	545	1235555223	96.6257
	NW_018734777.1	41454	97004	2.34004	782	0.425828	546	1235596677	96.6289
	NW_018736103.1	41450	118803	2.86618	588	0.521571	547	1235638127	96.6322
	NW_018735116.1	41414	143671	3.46914	429	0.631295	548	1235679541	96.6354
	NW_018734472.1	41369	204173	4.93541	188	0.898119	549	1235720910	96.6386
	NW_018736525.1	41298	166492	4.03148	313	0.733626	550	1235762208	96.6419
	NW_018735137.1	41221	62925	1.52653	1191	0.277789	551	1235803429	96.6451
	NW_018734450.1	41188	244420	5.93425	104	1.07988	552	1235844617	96.6483
	NW_018736361.1	41186	98493	2.39142	763	0.435177	553	1235885803	96.6515
	NW_018736293.1	41104	43131	1.04931	1546	0.190948	554	1235926907	96.6547
	NW_018734856.1	41095	171613	4.17601	296	0.759927	555	1235968002	96.6579
	NW_018736397.1	41031	85970	2.09525	889	0.381281	556	1236009033	96.6612
	NW_018735208.1	40926	151073	3.69137	382	0.671735	557	1236049959	96.6644
	NW_018736152.1	40856	32767	0.802012	1748	0.145946	558	1236090815	96.6676
	NW_018736583.1	40827	51381	1.25851	1365	0.229016	559	1236131642	96.6707
	NW_018736382.1	40810	76755	1.88079	981	0.342256	560	1236172452	96.6739
	NW_018735024.1	40773	46085	1.13028	1470	0.205683	561	1236213225	96.6771
	NW_018735097.1	40765	194686	4.77581	208	0.869076	562	1236253990	96.6803
	NW_018735375.1	40750	34134	0.837644	1707	0.15243	563	1236294740	96.6835
	NW_018736371.1	40745	70321	1.72588	1076	0.314066	564	1236335485	96.6867
	NW_018736242.1	40741	33916	0.832478	1712	0.15149	565	1236376226	96.6899
	NW_018734852.1	40725	35892	0.881326	1664	0.160379	566	1236416951	96.6931
	NW_018736392.1	40706	128579	3.15872	506	0.574807	567	1236457657	96.6962
	NW_018736363.1	40658	59274	1.45787	1232	0.265295	568	1236498315	96.6994
	NW_018734612.1	40651	75936	1.868	990	0.339928	569	1236538966	96.7026
	NW_018736590.1	40619	78345	1.92878	960	0.350988	570	1236579585	96.7058
	NW_018734559.1	40451	249753	6.17421	96	1.12355	571	1236620036	96.7089
	NW_018736404.1	40432	19505	0.482415	2050	0.0877872	572	1236660468	96.7121
	NW_018736216.1	40422	17552	0.434219	2090	0.0790168	573	1236700890	96.7153
	NW_018734553.1	40349	91292	2.26256	820	0.411728	574	1236741239	96.7184
	NW_018735394.1	40330	47716	1.18314	1422	0.215301	575	1236781569	96.7216
	NW_018736487.1	40269	50918	1.26445	1362	0.230097	576	1236821838	96.7247
	NW_018734917.1	40214	44392	1.10389	1501	0.200881	577	1236862052	96.7279
	NW_018736442.1	40105	67926	1.6937	1098	0.308211	578	1236902157	96.731
	NW_018735274.1	40098	24577	0.612923	1951	0.111536	579	1236942255	96.7341
	NW_018735843.1	40030	126413	3.15796	509	0.574668	580	1236982285	96.7373
	NW_018736142.1	40004	31626	0.790571	1759	0.143864	581	1237022289	96.7404
	NW_018736116.1	39974	100535	2.51501	725	0.457668	582	1237062263	96.7435
	NW_018734560.1	39873	78756	1.97517	944	0.359431	583	1237102136	96.7466
	NW_018736245.1	39865	86928	2.18056	849	0.396806	584	1237142001	96.7498
	NW_018735476.1	39864	124024	3.11118	524	0.566155	585	1237181865	96.7529
	NW_018734408.1	39846	53466	1.34182	1305	0.244176	586	1237221711	96.756
	NW_018734688.1	39840	112285	2.8184	606	0.512877	587	1237261551	96.7591
	NW_018735684.1	39780	17715	0.445324	2085	0.0810377	588	1237301331	96.7622
	NW_018735975.1	39763	109548	2.75502	633	0.501344	589	1237341094	96.7653
	NW_018735189.1	39746	61617	1.55027	1179	0.28211	590	1237380840	96.7684
	NW_018736270.1	39725	58599	1.47512	1219	0.268434	591	1237420565	96.7715
	NW_018736561.1	39662	165287	4.16739	297	0.758359	592	1237460227	96.7746
	NW_018735924.1	39644	142291	3.58922	403	0.653147	593	1237499871	96.7777
	NW_018734487.1	39626	106138	2.67849	665	0.487418	594	1237539497	96.7808
	NW_018736489.1	39621	88261	2.22763	828	0.405372	595	1237579118	96.7839
	NW_018735741.1	39618	34020	0.858701	1685	0.156262	596	1237618736	96.787
	NW_018735920.1	39597	103708	2.61909	683	0.476607	597	1237658333	96.7901
	NW_018736592.1	39559	247009	6.24407	92	1.13626	598	1237697892	96.7932
	NW_018735322.1	39455	103817	2.63128	681	0.478825	599	1237737347	96.7963
	NW_018735933.1	39440	22142	0.56141	1992	0.102162	600	1237776787	96.7994
	NW_018735038.1	39418	41830	1.06119	1535	0.19311	601	1237816205	96.8025
	NW_018734510.1	39364	67516	1.71517	1083	0.312118	602	1237855569	96.8056
	NW_018734607.1	39343	246298	6.26028	90	1.13921	603	1237894912	96.8086
	NW_018736188.1	39337	77136	1.9609	949	0.356834	604	1237934249	96.8117
	NW_018735047.1	39328	107600	2.73596	639	0.497876	605	1237973577	96.8148
	NW_018735417.1	39321	88006	2.23814	825	0.407285	606	1238012898	96.8179
	NW_018736631.1	39184	101580	2.59238	693	0.471748	607	1238052082	96.8209
	NW_018734631.1	39151	20374	0.520395	2024	0.0946987	608	1238091233	96.824
	NW_018736667.1	39138	226674	5.79166	111	1.05393	609	1238130371	96.8271
	NW_018734960.1	39134	203547	5.20128	162	0.946501	610	1238169505	96.8301
	NW_018734732.1	39116	107783	2.75547	632	0.501426	611	1238208621	96.8332
	NW_018734942.1	39110	55161	1.41041	1267	0.256658	612	1238247731	96.8362
	NW_018736033.1	39066	101116	2.58834	696	0.471012	613	1238286797	96.8393
	NW_018735452.1	39064	35605	0.911453	1648	0.165861	614	1238325861	96.8423
	NW_018736513.1	39036	39759	1.01852	1573	0.185345	615	1238364897	96.8454
	NW_018734649.1	38999	17562	0.450319	2080	0.0819466	616	1238403896	96.8484
	NW_018734452.1	38975	283996	7.28662	51	1.32598	617	1238442871	96.8515
	NW_018736531.1	38927	155652	3.99856	324	0.727636	618	1238481798	96.8545
	NW_018735842.1	38852	136571	3.51516	422	0.63967	619	1238520650	96.8576
	NW_018736504.1	38810	67100	1.72894	1071	0.314622	620	1238559460	96.8606
	NW_018736532.1	38780	44250	1.14105	1457	0.207642	621	1238598240	96.8636
	NW_018736355.1	38760	58516	1.5097	1204	0.274727	622	1238637000	96.8667
	NW_018735402.1	38739	131650	3.39838	448	0.618419	623	1238675739	96.8697
	NW_018734814.1	38734	167298	4.31915	278	0.785976	624	1238714473	96.8727
	NW_018735549.1	38733	99743	2.57514	704	0.46861	625	1238753206	96.8758
	NW_018735477.1	38703	82985	2.14415	872	0.390181	626	1238791909	96.8788
	NW_018735153.1	38698	177067	4.57561	246	0.832645	627	1238830607	96.8818
	NW_018734499.1	38664	101957	2.637	678	0.479867	628	1238869271	96.8848
	NW_018736214.1	38655	36921	0.955142	1615	0.173811	629	1238907926	96.8879
	NW_018736711.1	38616	111529	2.88816	581	0.525571	630	1238946542	96.8909
	NW_018735121.1	38588	48994	1.26967	1358	0.231048	631	1238985130	96.8939
	NW_018736596.1	38581	40666	1.05404	1541	0.191809	632	1239023711	96.8969
	NW_018735450.1	38553	85066	2.20647	842	0.401521	633	1239062264	96.8999
	NW_018735341.1	38549	16395	0.425303	2104	0.0773943	634	1239100813	96.9029
	NW_018734456.1	38546	39057	1.01326	1577	0.184387	635	1239139359	96.906
	NW_018735444.1	38492	104212	2.70737	650	0.492672	636	1239177851	96.909
	NW_018735998.1	38468	24771	0.643938	1915	0.11718	637	1239216319	96.912
	NW_018736155.1	38443	177130	4.6076	241	0.838466	638	1239254762	96.915
	NW_018734765.1	38428	192941	5.02084	179	0.913666	639	1239293190	96.918
	NW_018736136.1	38371	53328	1.3898	1281	0.252908	640	1239331561	96.921
	NW_018734950.1	38297	29778	0.777554	1780	0.141495	641	1239369858	96.924
	NW_018735113.1	38290	55588	1.45176	1235	0.264184	642	1239408148	96.927
	NW_018736691.1	38288	114788	2.99802	547	0.545562	643	1239446436	96.93
	NW_018736580.1	38286	48563	1.26843	1359	0.230821	644	1239484722	96.933
	NW_018735633.1	38223	189678	4.9624	184	0.903031	645	1239522945	96.936
	NW_018735936.1	38217	34515	0.903132	1652	0.164347	646	1239561162	96.9389
	NW_018736589.1	38190	189631	4.96546	183	0.903588	647	1239599352	96.9419
	NW_018736241.1	38190	14767	0.386672	2130	0.0703644	648	1239637542	96.9449
	NW_018736094.1	38189	29354	0.768651	1789	0.139875	649	1239675731	96.9479
	NW_018734733.1	38183	24472	0.640913	1920	0.11663	650	1239713914	96.9509
	NW_018735704.1	38157	137289	3.598	402	0.654745	651	1239752071	96.9539
	NW_018735070.1	38128	224299	5.88279	106	1.07052	652	1239790199	96.9569
	NW_018735020.1	38101	63805	1.67463	1116	0.30474	653	1239828300	96.9598
	NW_018734844.1	38054	52634	1.38314	1286	0.251696	654	1239866354	96.9628
	NW_018735643.1	38051	113835	2.99164	551	0.544403	655	1239904405	96.9658
	NW_018736394.1	38033	164042	4.31315	279	0.784883	656	1239942438	96.9688
	NW_018735449.1	38010	170860	4.49513	252	0.818	657	1239980448	96.9717
	NW_018734444.1	37991	170136	4.47832	254	0.814941	658	1240018439	96.9747
	NW_018736533.1	37991	57691	1.51854	1197	0.276336	659	1240056430	96.9777
	NW_018735036.1	37989	110420	2.90663	574	0.528933	660	1240094419	96.9807
	NW_018735310.1	37983	58940	1.55175	1178	0.282378	661	1240132402	96.9836
	NW_018735421.1	37978	66364	1.74743	1058	0.317988	662	1240170380	96.9866
	NW_018735235.1	37947	37849	0.997417	1590	0.181505	663	1240208327	96.9896
	NW_018735922.1	37940	55220	1.45546	1233	0.264856	664	1240246267	96.9925
	NW_018736224.1	37932	13215	0.348387	2174	0.0633975	665	1240284199	96.9955
	NW_018735556.1	37876	27000	0.712852	1843	0.129721	666	1240322075	96.9985
	NW_018734420.1	37859	34911	0.922132	1642	0.167805	667	1240359934	97.0014
	NW_018735620.1	37824	14600	0.385998	2132	0.0702419	668	1240397758	97.0044
	NW_018735057.1	37777	23642	0.625831	1938	0.113885	669	1240435535	97.0073
	NW_018736198.1	37712	24440	0.64807	1910	0.117932	670	1240473247	97.0103
	NW_018734825.1	37702	138973	3.68609	384	0.670775	671	1240510949	97.0132
	NW_018735370.1	37621	19392	0.515457	2026	0.0938	672	1240548570	97.0162
	NW_018735345.1	37601	47843	1.27239	1356	0.231542	673	1240586171	97.0191
	NW_018735012.1	37583	62017	1.65013	1132	0.300282	674	1240623754	97.022
	NW_018734831.1	37558	75544	2.0114	931	0.366023	675	1240661312	97.025
	NW_018734963.1	37541	43193	1.15056	1449	0.209372	676	1240698853	97.0279
	NW_018734804.1	37521	18279	0.487167	2048	0.088652	677	1240736374	97.0309
	NW_018735484.1	37512	36063	0.961372	1611	0.174945	678	1240773886	97.0338
	NW_018735055.1	37486	41994	1.12026	1483	0.203858	679	1240811372	97.0367
	NW_018736186.1	37471	32501	0.867364	1677	0.157838	680	1240848843	97.0397
	NW_018734458.1	37460	74345	1.98465	940	0.361156	681	1240886303	97.0426
	NW_018734580.1	37424	96093	2.56768	708	0.467253	682	1240923727	97.0455
	NW_018735285.1	37421	68708	1.83608	1004	0.33412	683	1240961148	97.0484
	NW_018735470.1	37416	157575	4.21143	294	0.766374	684	1240998564	97.0514
	NW_018734729.1	37374	214289	5.73364	118	1.04338	685	1241035938	97.0543
	NW_018736632.1	37369	87936	2.35318	775	0.428219	686	1241073307	97.0572
	NW_018734737.1	37191	10322	0.27754	2222	0.0505053	687	1241110498	97.0601
	NW_018735019.1	37184	31976	0.85994	1683	0.156487	688	1241147682	97.063
	NW_018734641.1	37180	23095	0.621167	1945	0.113037	689	1241184862	97.0659
	NW_018735145.1	37155	54452	1.46554	1228	0.26669	690	1241222017	97.0688
	NW_018734946.1	37152	18961	0.510363	2031	0.092873	691	1241259169	97.0717
	NW_018735437.1	37119	78738	2.12123	877	0.38601	692	1241296288	97.0746
	NW_018735246.1	37100	62734	1.69094	1100	0.307709	693	1241333388	97.0775
	NW_018736521.1	37096	79495	2.14295	873	0.389963	694	1241370484	97.0804
	NW_018735066.1	37094	58668	1.5816	1162	0.287812	695	1241407578	97.0833
	NW_018735581.1	37085	77721	2.09575	888	0.381374	696	1241444663	97.0862
	NW_018734713.1	37057	76931	2.07602	904	0.377782	697	1241481720	97.0891
	NW_018735382.1	37039	53168	1.43546	1256	0.261217	698	1241518759	97.092
	NW_018734636.1	37024	38880	1.05013	1545	0.191097	699	1241555783	97.0949
	NW_018736231.1	36993	47503	1.28411	1347	0.233675	700	1241592776	97.0978
	NW_018734868.1	36988	77296	2.08976	896	0.380283	701	1241629764	97.1007
	NW_018735356.1	36970	193355	5.23005	158	0.951736	702	1241666734	97.1036
	NW_018735052.1	36950	27291	0.738593	1823	0.134405	703	1241703684	97.1065
	NW_018736396.1	36917	53226	1.44177	1250	0.262366	704	1241740601	97.1094
	NW_018736701.1	36816	20709	0.5625	1991	0.102361	705	1241777417	97.1123
	NW_018734797.1	36767	118781	3.23064	488	0.587895	706	1241814184	97.1151
	NW_018736146.1	36764	98759	2.6863	662	0.488838	707	1241850948	97.118
	NW_018735961.1	36711	187926	5.11907	169	0.93154	708	1241887659	97.1209
	NW_018735418.1	36673	11052	0.301366	2205	0.054841	709	1241924332	97.1238
	NW_018734780.1	36602	62391	1.70458	1093	0.31019	710	1241960934	97.1266
	NW_018735373.1	36599	66448	1.81557	1015	0.330387	711	1241997533	97.1295
	NW_018735351.1	36589	79602	2.17557	853	0.395899	712	1242034122	97.1323
	NW_018735912.1	36558	23304	0.637453	1923	0.116	713	1242070680	97.1352
	NW_018736428.1	36474	32675	0.895844	1658	0.163021	714	1242107154	97.1381
	NW_018735966.1	36469	24076	0.660177	1894	0.120135	715	1242143623	97.1409
	NW_018736080.1	36449	23866	0.654778	1900	0.119153	716	1242180072	97.1438
	NW_018735619.1	36432	91281	2.50552	730	0.45594	717	1242216504	97.1466
	NW_018734839.1	36424	145932	4.00648	319	0.729077	718	1242252928	97.1495
	NW_018735118.1	36407	75453	2.07249	907	0.37714	719	1242289335	97.1523
	NW_018735598.1	36405	41442	1.13836	1460	0.207153	720	1242325740	97.1552
	NW_018734664.1	36339	21008	0.578112	1975	0.105202	721	1242362079	97.158
	NW_018736304.1	36310	53380	1.47012	1223	0.267524	722	1242398389	97.1608
	NW_018734884.1	36273	21806	0.601163	1958	0.109396	723	1242434662	97.1637
	NW_018735214.1	36252	56504	1.55865	1176	0.283634	724	1242470914	97.1665
	NW_018736699.1	36165	20416	0.564524	1989	0.102729	725	1242507079	97.1693
	NW_018735077.1	36136	84995	2.35209	776	0.42802	726	1242543215	97.1722
	NW_018736180.1	36134	31816	0.8805	1666	0.160229	727	1242579349	97.175
	NW_018735280.1	36115	48845	1.35249	1298	0.246118	728	1242615464	97.1778
	NW_018735086.1	36100	198729	5.50496	135	1.00176	729	1242651564	97.1806
	NW_018735035.1	36098	64785	1.7947	1030	0.326589	730	1242687662	97.1835
	NW_018734949.1	36093	75358	2.08788	900	0.379942	731	1242723755	97.1863
	NW_018735155.1	36090	97300	2.69604	656	0.49061	732	1242759845	97.1891
	NW_018734413.1	36088	41652	1.15418	1443	0.210031	733	1242795933	97.1919
	NW_018736063.1	36073	43791	1.21396	1398	0.220909	734	1242832006	97.1947
	NW_018734824.1	36065	105501	2.9253	570	0.53233	735	1242868071	97.1976
	NW_018735984.1	36062	99518	2.75964	628	0.502184	736	1242904133	97.2004
	NW_018734904.1	36033	113806	3.15838	507	0.574745	737	1242940166	97.2032
	NW_018734485.1	36027	58677	1.6287	1146	0.296381	738	1242976193	97.206
	NW_018734492.1	35991	18768	0.521464	2021	0.0948931	739	1243012184	97.2088
	NW_018736300.1	35946	72538	2.01797	929	0.367219	740	1243048130	97.2116
	NW_018734598.1	35937	54247	1.5095	1205	0.274691	741	1243084067	97.2145
	NW_018736113.1	35933	47298	1.31628	1324	0.23953	742	1243120000	97.2173
	NW_018736408.1	35884	72288	2.01449	930	0.366586	743	1243155884	97.2201
	NW_018736265.1	35874	19815	0.55235	1999	0.100514	744	1243191758	97.2229
	NW_018734776.1	35822	48159	1.3444	1300	0.244646	745	1243227580	97.2257
	NW_018735824.1	35822	15510	0.432974	2092	0.0787903	746	1243263402	97.2285
	NW_018735363.1	35821	49945	1.39429	1276	0.253726	747	1243299223	97.2313
	NW_018736399.1	35797	74083	2.06953	910	0.376602	748	1243335020	97.2341
	NW_018734496.1	35781	66833	1.86783	991	0.339898	749	1243370801	97.2369
	NW_018736181.1	35761	96458	2.6973	654	0.490839	750	1243406562	97.2397
	NW_018735380.1	35739	69400	1.94186	955	0.353368	751	1243442301	97.2425
	NW_018736644.1	35731	54715	1.5313	1188	0.278658	752	1243478032	97.2453
	NW_018734992.1	35659	39802	1.11618	1489	0.203117	753	1243513691	97.2481
	NW_018735207.1	35589	24086	0.676782	1877	0.123157	754	1243549280	97.2508
	NW_018735281.1	35558	162759	4.57728	245	0.832949	755	1243584838	97.2536
	NW_018734881.1	35553	66712	1.87641	984	0.341459	756	1243620391	97.2564
	NW_018736455.1	35551	76950	2.1645	865	0.393883	757	1243655942	97.2592
	NW_018736341.1	35533	142879	4.02102	314	0.731724	758	1243691475	97.262
	NW_018734728.1	35528	36609	1.03043	1562	0.187511	759	1243727003	97.2647
	NW_018734529.1	35509	111413	3.1376	517	0.570963	760	1243762512	97.2675
	NW_018736393.1	35500	22373	0.630225	1932	0.114685	761	1243798012	97.2703
	NW_018735258.1	35424	67830	1.9148	968	0.348446	762	1243833436	97.2731
	NW_018735500.1	35404	36478	1.03034	1563	0.187495	763	1243868840	97.2758
	NW_018734830.1	35403	105512	2.98031	557	0.542341	764	1243904243	97.2786
	NW_018734994.1	35400	74032	2.0913	893	0.380563	765	1243939643	97.2814
	NW_018735803.1	35384	35708	1.00916	1581	0.183641	766	1243975027	97.2841
	NW_018735143.1	35371	82960	2.34542	780	0.426808	767	1244010398	97.2869
	NW_018734610.1	35353	23028	0.651373	1901	0.118533	768	1244045751	97.2897
	NW_018735482.1	35313	27841	0.788407	1766	0.14347	769	1244081064	97.2924
	NW_018734708.1	35312	48445	1.37191	1288	0.249653	770	1244116376	97.2952
	NW_018735809.1	35310	163206	4.62209	237	0.841103	771	1244151686	97.2979
	NW_018735472.1	35305	21064	0.596629	1967	0.108571	772	1244186991	97.3007
	NW_018734756.1	35266	59328	1.6823	1109	0.306136	773	1244222257	97.3035
	NW_018735915.1	35244	20892	0.592782	1970	0.107871	774	1244257501	97.3062
	NW_018735481.1	35208	60072	1.7062	1089	0.310486	775	1244292709	97.309
	NW_018734709.1	35196	67583	1.92019	965	0.349426	776	1244327905	97.3117
	NW_018734803.1	35181	61284	1.74196	1062	0.316993	777	1244363086	97.3145
	NW_018735967.1	35181	32640	0.927774	1635	0.168831	778	1244398267	97.3172
	NW_018735275.1	35086	59440	1.69412	1097	0.308287	779	1244433353	97.32
	NW_018734611.1	35082	146179	4.16678	298	0.758248	780	1244468435	97.3227
	NW_018734930.1	35071	26892	0.766787	1791	0.139536	781	1244503506	97.3255
	NW_018736459.1	35069	13057	0.372323	2148	0.0677533	782	1244538575	97.3282
	NW_018735956.1	35067	80828	2.30496	797	0.419444	783	1244573642	97.3309
	NW_018736029.1	35047	253254	7.22612	52	1.31497	784	1244608689	97.3337
	NW_018734691.1	35047	24592	0.701686	1850	0.127689	785	1244643736	97.3364
	NW_018735354.1	35043	21953	0.626459	1937	0.114	786	1244678779	97.3392
	NW_018736518.1	34961	51261	1.46623	1227	0.266817	787	1244713740	97.3419
	NW_018735381.1	34955	73577	2.10491	882	0.383039	788	1244748695	97.3446
	NW_018735237.1	34938	171403	4.90592	192	0.892752	789	1244783633	97.3474
	NW_018735955.1	34938	22236	0.636442	1924	0.115816	790	1244818571	97.3501
	NW_018734661.1	34889	83392	2.39021	764	0.434957	791	1244853460	97.3528
	NW_018734623.1	34869	33104	0.949382	1620	0.172763	792	1244888329	97.3556
	NW_018736108.1	34868	49388	1.41643	1266	0.257754	793	1244923197	97.3583
	NW_018735082.1	34844	97854	2.80835	609	0.511047	794	1244958041	97.361
	NW_018735414.1	34827	60737	1.74396	1060	0.317357	795	1244992868	97.3637
	NW_018734594.1	34816	54899	1.57683	1164	0.286943	796	1245027684	97.3665
	NW_018734625.1	34771	18831	0.541572	2007	0.0985523	797	1245062455	97.3692
	NW_018735415.1	34769	84096	2.41871	755	0.440143	798	1245097224	97.3719
	NW_018736620.1	34742	49984	1.43872	1252	0.26181	799	1245131966	97.3746
	NW_018735522.1	34731	23536	0.677665	1876	0.123318	800	1245166697	97.3773
	NW_018736084.1	34664	38188	1.10166	1504	0.200474	801	1245201361	97.38
	NW_018736164.1	34661	27982	0.807305	1739	0.146909	802	1245236022	97.3827
	NW_018734648.1	34646	23129	0.667581	1888	0.121483	803	1245270668	97.3855
	NW_018734767.1	34641	9838	0.283999	2216	0.0516805	804	1245305309	97.3882
	NW_018734822.1	34615	176481	5.0984	173	0.927778	805	1245339924	97.3909
	NW_018736031.1	34589	7137	0.206337	2256	0.0375481	806	1245374513	97.3936
	NW_018734988.1	34555	37226	1.0773	1523	0.196041	807	1245409068	97.3963
	NW_018734969.1	34551	18107	0.524066	2018	0.0953666	808	1245443619	97.399
	NW_018735309.1	34548	20952	0.606461	1953	0.11036	809	1245478167	97.4017
	NW_018734923.1	34522	60169	1.74292	1061	0.317167	810	1245512689	97.4044
	NW_018735916.1	34518	220135	6.3774	83	1.16052	811	1245547207	97.4071
	NW_018735098.1	34514	228622	6.62404	71	1.20541	812	1245581721	97.4098
	NW_018736567.1	34476	104402	3.02825	543	0.551065	813	1245616197	97.4125
	NW_018735064.1	34435	11825	0.343401	2178	0.0624902	814	1245650632	97.4152
	NW_018736500.1	34404	30414	0.884025	1662	0.16087	815	1245685036	97.4179
	NW_018736039.1	34403	186207	5.41252	144	0.984941	816	1245719439	97.4206
	NW_018736547.1	34391	125415	3.64674	395	0.663614	817	1245753830	97.4232
	NW_018735428.1	34380	199079	5.79055	112	1.05373	818	1245788210	97.4259
	NW_018735429.1	34366	83225	2.42172	752	0.440692	819	1245822576	97.4286
	NW_018735124.1	34325	65149	1.898	975	0.345388	820	1245856901	97.4313
	NW_018734932.1	34288	27107	0.790568	1760	0.143863	821	1245891189	97.434
	NW_018734813.1	34254	91140	2.66071	672	0.484182	822	1245925443	97.4367
	NW_018736378.1	34196	73385	2.14601	871	0.390519	823	1245959639	97.4393
	NW_018736418.1	34196	27120	0.793075	1756	0.14432	824	1245993835	97.442
	NW_018735992.1	34180	63114	1.84652	998	0.336019	825	1246028015	97.4447
	NW_018735058.1	34154	69996	2.04942	916	0.372943	826	1246062169	97.4474
	NW_018734979.1	34103	42040	1.23274	1377	0.224327	827	1246096272	97.45
	NW_018735978.1	34076	24023	0.704983	1849	0.128289	828	1246130348	97.4527
	NW_018734667.1	34075	65039	1.9087	970	0.347335	829	1246164423	97.4554
	NW_018734701.1	34064	67326	1.97646	942	0.359665	830	1246198487	97.458
	NW_018735705.1	34050	34333	1.00831	1582	0.183487	831	1246232537	97.4607
	NW_018735386.1	34049	145186	4.26403	286	0.775945	832	1246266586	97.4633
	NW_018736122.1	34006	33960	0.998647	1589	0.181728	833	1246300592	97.466
	NW_018736433.1	33991	117058	3.44379	436	0.626683	834	1246334583	97.4687
	NW_018736410.1	33975	36310	1.06873	1529	0.194481	835	1246368558	97.4713
	NW_018736077.1	33973	241747	7.11586	57	1.2949	836	1246402531	97.474
	NW_018734991.1	33967	37521	1.10463	1499	0.201015	837	1246436498	97.4766
	NW_018734746.1	33950	230255	6.78218	65	1.23418	838	1246470448	97.4793
	NW_018735784.1	33936	404823	11.929	15	2.17078	839	1246504384	97.4819
	NW_018735315.1	33933	113234	3.33699	464	0.607247	840	1246538317	97.4846
	NW_018736687.1	33927	38625	1.13847	1459	0.207173	841	1246572244	97.4872
	NW_018734418.1	33902	16644	0.490944	2044	0.0893394	842	1246606146	97.4899
	NW_018736234.1	33888	44447	1.31159	1328	0.238675	843	1246640034	97.4925
	NW_018736244.1	33873	99695	2.9432	564	0.535587	844	1246673907	97.4952
	NW_018736095.1	33853	55942	1.6525	1130	0.300712	845	1246707760	97.4978
	NW_018736668.1	33834	34032	1.00585	1584	0.183039	846	1246741594	97.5005
	NW_018734957.1	33824	7820	0.231197	2243	0.0420719	847	1246775418	97.5031
	NW_018735773.1	33813	24743	0.73176	1829	0.133162	848	1246809231	97.5058
	NW_018735977.1	33810	233728	6.91298	62	1.25799	849	1246843041	97.5084
	NW_018734821.1	33784	28308	0.837911	1705	0.152479	850	1246876825	97.5111
	NW_018736271.1	33777	51343	1.52006	1194	0.276612	851	1246910602	97.5137
	NW_018735265.1	33754	17346	0.513895	2030	0.0935157	852	1246944356	97.5163
	NW_018734652.1	33731	95186	2.82191	605	0.513517	853	1246978087	97.519
	NW_018736646.1	33729	44474	1.31857	1323	0.239946	854	1247011816	97.5216
	NW_018734409.1	33725	21885	0.648925	1908	0.118088	855	1247045541	97.5243
	NW_018736381.1	33715	25045	0.742844	1818	0.135179	856	1247079256	97.5269
	NW_018734959.1	33707	8556	0.253835	2238	0.0461914	857	1247112963	97.5295
	NW_018736019.1	33693	37395	1.10987	1495	0.201969	858	1247146656	97.5322
	NW_018735253.1	33692	16947	0.502998	2037	0.0915328	859	1247180348	97.5348
	NW_018736008.1	33673	69802	2.07294	906	0.377222	860	1247214021	97.5374
	NW_018736568.1	33664	20022	0.59476	1968	0.108231	861	1247247685	97.5401
	NW_018736452.1	33654	76604	2.27622	809	0.414215	862	1247281339	97.5427
	NW_018735111.1	33631	89077	2.64866	676	0.481988	863	1247314970	97.5453
	NW_018735986.1	33630	77220	2.29616	801	0.417843	864	1247348600	97.548
	NW_018736096.1	33629	144794	4.30563	282	0.783515	865	1247382229	97.5506
	NW_018735186.1	33619	226286	6.7309	66	1.22485	866	1247415848	97.5532
	NW_018736228.1	33619	77535	2.30629	795	0.419685	867	1247449467	97.5558
	NW_018735264.1	33596	35438	1.05483	1540	0.191952	868	1247483063	97.5585
	NW_018736178.1	33562	39433	1.17493	1428	0.213807	869	1247516625	97.5611
	NW_018736292.1	33551	159390	4.75068	213	0.864502	870	1247550176	97.5637
	NW_018734653.1	33551	82995	2.4737	740	0.45015	871	1247583727	97.5663
	NW_018735459.1	33539	74876	2.23251	827	0.406259	872	1247617266	97.569
	NW_018736129.1	33513	12421	0.370632	2150	0.0674456	873	1247650779	97.5716
	NW_018734546.1	33464	40973	1.22439	1386	0.222808	874	1247684243	97.5742
	NW_018734958.1	33452	37665	1.12594	1475	0.204893	875	1247717695	97.5768
	NW_018735242.1	33448	54837	1.63947	1141	0.298342	876	1247751143	97.5794
	NW_018735099.1	33442	55953	1.67314	1118	0.304468	877	1247784585	97.5821
	NW_018736474.1	33423	132764	3.97223	330	0.722846	878	1247818008	97.5847
	NW_018736323.1	33417	60322	1.80513	1024	0.328488	879	1247851425	97.5873
	NW_018736026.1	33404	118843	3.55775	414	0.64742	880	1247884829	97.5899
	NW_018735346.1	33401	9213	0.27583	2224	0.0501941	881	1247918230	97.5925
	NW_018736469.1	33396	38997	1.16771	1432	0.212494	882	1247951626	97.5951
	NW_018734674.1	33382	51637	1.54685	1182	0.281488	883	1247985008	97.5977
	NW_018736335.1	33378	14355	0.430074	2096	0.0782625	884	1248018386	97.6003
	NW_018734670.1	33376	250351	7.50093	45	1.36498	885	1248051762	97.603
	NW_018735297.1	33334	37280	1.11838	1487	0.203516	886	1248085096	97.6056
	NW_018735033.1	33329	53324	1.59993	1153	0.291146	887	1248118425	97.6082
	NW_018735640.1	33328	30297	0.909055	1649	0.165425	888	1248151753	97.6108
	NW_018736597.1	33321	34395	1.03223	1560	0.18784	889	1248185074	97.6134
	NW_018736453.1	33314	60872	1.82722	1008	0.332507	890	1248218388	97.616
	NW_018736625.1	33310	158726	4.76512	212	0.86713	891	1248251698	97.6186
	NW_018736603.1	33300	99711	2.99432	549	0.544891	892	1248284998	97.6212
	NW_018735014.1	33293	184879	5.55309	132	1.01052	893	1248318291	97.6238
	NW_018736089.1	33293	37850	1.13688	1463	0.206882	894	1248351584	97.6264
	NW_018735122.1	33289	282578	8.48863	32	1.54471	895	1248384873	97.629
	NW_018736137.1	33276	105840	3.18067	502	0.578801	896	1248418149	97.6316
	NW_018735250.1	33256	48725	1.46515	1229	0.26662	897	1248451405	97.6342
	NW_018736698.1	33210	40403	1.21659	1395	0.221389	898	1248484615	97.6368
	NW_018736058.1	33180	12800	0.385775	2133	0.0702012	899	1248517795	97.6394
	NW_018734575.1	33178	92586	2.79058	616	0.507815	900	1248550973	97.642
	NW_018735629.1	33147	11135	0.335928	2184	0.0611303	901	1248584120	97.6446
	NW_018736671.1	33144	57270	1.72791	1072	0.314436	902	1248617264	97.6472
	NW_018735486.1	33103	25186	0.760837	1797	0.138453	903	1248650367	97.6498
	NW_018736024.1	33102	66392	2.00568	934	0.364983	904	1248683469	97.6524
	NW_018734519.1	33092	90685	2.74039	637	0.498681	905	1248716561	97.6549
	NW_018736436.1	33091	26420	0.798404	1752	0.145289	906	1248749652	97.6575
	NW_018736205.1	33089	18991	0.573937	1983	0.104442	907	1248782741	97.6601
	NW_018734454.1	33041	34524	1.04488	1553	0.190142	908	1248815782	97.6627
	NW_018736430.1	33029	89310	2.70399	651	0.492057	909	1248848811	97.6653
	NW_018735021.1	33022	235039	7.11765	55	1.29523	910	1248881833	97.6679
	NW_018734574.1	33004	98811	2.99391	550	0.544815	911	1248914837	97.6704
	NW_018736661.1	32999	50826	1.54023	1184	0.280282	912	1248947836	97.673
	NW_018734794.1	32997	75932	2.30118	799	0.418756	913	1248980833	97.6756
	NW_018736512.1	32986	15520	0.470503	2058	0.0856195	914	1249013819	97.6782
	NW_018734735.1	32983	84176	2.5521	713	0.464418	915	1249046802	97.6808
	NW_018734642.1	32977	111815	3.3907	451	0.61702	916	1249079779	97.6833
	NW_018735670.1	32953	168041	5.09941	172	0.927964	917	1249112732	97.6859
	NW_018736225.1	32932	16122	0.489554	2045	0.0890864	918	1249145664	97.6885
	NW_018735252.1	32917	55229	1.67783	1112	0.305322	919	1249178581	97.6911
	NW_018734505.1	32865	173210	5.27035	156	0.959069	920	1249211446	97.6936
	NW_018735101.1	32849	33613	1.02326	1569	0.186207	921	1249244295	97.6962
	NW_018734626.1	32838	36050	1.09781	1509	0.199774	922	1249277133	97.6988
	NW_018735419.1	32808	26404	0.804804	1742	0.146454	923	1249309941	97.7013
	NW_018735894.1	32789	43340	1.32178	1319	0.240531	924	1249342730	97.7039
	NW_018734605.1	32776	83581	2.55007	715	0.464047	925	1249375506	97.7065
	NW_018735320.1	32748	90759	2.77144	623	0.504331	926	1249408254	97.709
	NW_018734895.1	32747	169629	5.17999	164	0.942626	927	1249441001	97.7116
	NW_018735492.1	32740	89499	2.73363	640	0.497451	928	1249473741	97.7142
	NW_018736360.1	32723	66550	2.03374	923	0.370089	929	1249506464	97.7167
	NW_018735357.1	32716	114173	3.48982	427	0.635059	930	1249539180	97.7193
	NW_018736233.1	32711	33901	1.03638	1559	0.188595	931	1249571891	97.7218
	NW_018735063.1	32664	51878	1.58823	1158	0.289018	932	1249604555	97.7244
	NW_018736246.1	32625	25560	0.783448	1775	0.142568	933	1249637180	97.7269
	NW_018735204.1	32612	127350	3.905	339	0.710611	934	1249669792	97.7295
	NW_018736168.1	32606	53244	1.63295	1143	0.297156	935	1249702398	97.732
	NW_018734927.1	32577	27647	0.848666	1696	0.154436	936	1249734975	97.7346
	NW_018734989.1	32533	212943	6.54545	74	1.1911	937	1249767508	97.7371
	NW_018736007.1	32525	18670	0.57402	1982	0.104457	938	1249800033	97.7397
	NW_018736478.1	32516	93084	2.86271	589	0.520941	939	1249832549	97.7422
	NW_018735493.1	32505	68176	2.0974	887	0.381673	940	1249865054	97.7448
	NW_018736138.1	32484	25182	0.775212	1783	0.141069	941	1249897538	97.7473
	NW_018735062.1	32478	7383	0.227323	2247	0.041367	942	1249930016	97.7498
	NW_018735198.1	32467	16058	0.494595	2042	0.0900036	943	1249962483	97.7524
	NW_018734640.1	32412	55602	1.71548	1082	0.312173	944	1249994895	97.7549
	NW_018734722.1	32392	11087	0.342276	2179	0.0622855	945	1250027287	97.7574
	NW_018736690.1	32387	38760	1.19678	1412	0.217783	946	1250059674	97.76
	NW_018736070.1	32379	75747	2.33939	783	0.425709	947	1250092053	97.7625
	NW_018735202.1	32375	29594	0.9141	1645	0.166343	948	1250124428	97.765
	NW_018736141.1	32373	55785	1.7232	1078	0.313578	949	1250156801	97.7676
	NW_018734431.1	32368	57970	1.79097	1032	0.32591	950	1250189169	97.7701
	NW_018735045.1	32363	11327	0.349998	2172	0.0636908	951	1250221532	97.7726
	NW_018734639.1	32356	11526	0.356225	2168	0.0648238	952	1250253888	97.7752
	NW_018736627.1	32333	89471	2.76717	624	0.503555	953	1250286221	97.7777
	NW_018736087.1	32305	13418	0.415354	2111	0.0755838	954	1250318526	97.7802
	NW_018735988.1	32288	9746	0.301846	2204	0.0549283	955	1250350814	97.7827
	NW_018736673.1	32260	39561	1.22632	1385	0.223159	956	1250383074	97.7853
	NW_018735340.1	32244	65926	2.0446	919	0.372065	957	1250415318	97.7878
	NW_018736102.1	32210	50379	1.56408	1174	0.284623	958	1250447528	97.7903
	NW_018736104.1	32204	69740	2.16557	863	0.394079	959	1250479732	97.7928
	NW_018735287.1	32191	83280	2.58706	698	0.470779	960	1250511923	97.7953
	NW_018736105.1	32179	129388	4.02088	315	0.731698	961	1250544102	97.7979
	NW_018734540.1	32178	42490	1.32047	1320	0.240291	962	1250576280	97.8004
	NW_018736150.1	32134	75069	2.33612	785	0.425115	963	1250608414	97.8029
	NW_018735230.1	32134	59744	1.85921	995	0.33833	964	1250640548	97.8054
	NW_018735947.1	32092	41284	1.28643	1346	0.234097	965	1250672640	97.8079
	NW_018735958.1	32088	26311	0.819964	1726	0.149213	966	1250704728	97.8104
	NW_018736479.1	32086	31239	0.973602	1603	0.177171	967	1250736814	97.8129
	NW_018735406.1	32024	25743	0.803866	1746	0.146283	968	1250768838	97.8154
	NW_018735979.1	32020	50259	1.56961	1170	0.28563	969	1250800858	97.8179
	NW_018734433.1	31972	92696	2.89929	575	0.527596	970	1250832830	97.8204
	NW_018735841.1	31958	119819	3.74926	368	0.682271	971	1250864788	97.8229
	NW_018734530.1	31923	45003	1.40974	1269	0.256536	972	1250896711	97.8254
	NW_018736268.1	31919	212778	6.66619	70	1.21308	973	1250928630	97.8279
	NW_018736501.1	31888	14409	0.451863	2078	0.0822275	974	1250960518	97.8304
	NW_018736163.1	31876	53206	1.66916	1119	0.303744	975	1250992394	97.8329
	NW_018736046.1	31863	38350	1.20359	1406	0.219023	976	1251024257	97.8354
	NW_018735015.1	31844	36616	1.14986	1450	0.209244	977	1251056101	97.8379
	NW_018734855.1	31843	29735	0.9338	1632	0.169928	978	1251087944	97.8404
	NW_018736209.1	31841	44617	1.40124	1273	0.254991	979	1251119785	97.8429
	NW_018735974.1	31796	38382	1.20713	1402	0.219667	980	1251151581	97.8454
	NW_018734696.1	31794	26285	0.826728	1719	0.150444	981	1251183375	97.8479
	NW_018735731.1	31794	8950	0.2815	2219	0.0512258	982	1251215169	97.8503
	NW_018735762.1	31784	29524	0.928895	1634	0.169035	983	1251246953	97.8528
	NW_018736585.1	31771	85548	2.69264	658	0.489993	984	1251278724	97.8553
	NW_018734633.1	31771	71217	2.24157	823	0.407909	985	1251310495	97.8578
	NW_018735840.1	31753	55042	1.73344	1067	0.315442	986	1251342248	97.8603
	NW_018736148.1	31690	67662	2.13512	876	0.388538	987	1251373938	97.8628
	NW_018735935.1	31687	83503	2.63524	680	0.479547	988	1251405625	97.8652
	NW_018735959.1	31680	23130	0.730114	1832	0.132862	989	1251437305	97.8677
	NW_018736503.1	31678	119341	3.76731	363	0.685555	990	1251468983	97.8702
	NW_018734967.1	31664	128666	4.06348	311	0.73945	991	1251500647	97.8727
	NW_018735968.1	31660	89779	2.83572	599	0.516029	992	1251532307	97.8751
	NW_018735766.1	31658	122660	3.87453	345	0.705067	993	1251563965	97.8776
	NW_018734875.1	31656	19610	0.619472	1946	0.112728	994	1251595621	97.8801
	NW_018736204.1	31649	55567	1.75573	1053	0.319498	995	1251627270	97.8826
	NW_018735324.1	31639	57659	1.8224	1010	0.331631	996	1251658909	97.885
	NW_018735401.1	31621	12000	0.379495	2141	0.0690584	997	1251690530	97.8875
	NW_018734845.1	31606	17292	0.547111	2003	0.0995603	998	1251722136	97.89
	NW_018736014.1	31527	179122	5.68154	122	1.0339	999	1251753663	97.8925
	NW_018736639.1	31494	58204	1.8481	997	0.336307	1000	1251785157	97.8949
	NW_018736706.1	31484	45151	1.43409	1257	0.260969	1001	1251816641	97.8974
	NW_018734934.1	31484	37818	1.20118	1408	0.218584	1002	1251848125	97.8998
	NW_018735905.1	31483	32784	1.04132	1555	0.189494	1003	1251879608	97.9023
	NW_018735735.1	31454	50749	1.61344	1150	0.293604	1004	1251911062	97.9048
	NW_018736340.1	31444	31549	1.00334	1585	0.182582	1005	1251942506	97.9072
	NW_018735918.1	31435	104612	3.32788	468	0.60559	1006	1251973941	97.9097
	NW_018735267.1	31422	93749	2.98355	554	0.54293	1007	1252005363	97.9121
	NW_018735950.1	31417	29768	0.947512	1622	0.172423	1008	1252036780	97.9146
	NW_018736281.1	31406	16491	0.525091	2015	0.0955532	1009	1252068186	97.9171
	NW_018735134.1	31398	25126	0.800242	1749	0.145624	1010	1252099584	97.9195
	NW_018734702.1	31396	7230	0.230284	2244	0.0419058	1011	1252130980	97.922
	NW_018736650.1	31391	52626	1.67647	1113	0.305074	1012	1252162371	97.9244
	NW_018736230.1	31377	20138	0.641808	1917	0.116793	1013	1252193748	97.9269
	NW_018736083.1	31376	83612	2.66484	671	0.484933	1014	1252225124	97.9293
	NW_018734749.1	31368	67149	2.14068	874	0.38955	1015	1252256492	97.9318
	NW_018736679.1	31363	34409	1.09712	1510	0.199648	1016	1252287855	97.9342
	NW_018735466.1	31355	24201	0.771839	1786	0.140455	1017	1252319210	97.9367
	NW_018736443.1	31349	13322	0.424958	2105	0.0773315	1018	1252350559	97.9391
	NW_018735715.1	31339	26867	0.857302	1689	0.156007	1019	1252381898	97.9416
	NW_018735744.1	31322	174780	5.5801	131	1.01544	1020	1252413220	97.944
	NW_018735249.1	31313	68049	2.17319	856	0.395465	1021	1252444533	97.9465
	NW_018735369.1	31301	134947	4.31127	280	0.784541	1022	1252475834	97.9489
	NW_018734965.1	31290	18728	0.59853	1963	0.108917	1023	1252507124	97.9514
	NW_018736370.1	31229	21592	0.691409	1865	0.125819	1024	1252538353	97.9538
	NW_018735290.1	31228	23198	0.742859	1817	0.135181	1025	1252569581	97.9563
	NW_018734736.1	31217	79043	2.53205	722	0.460769	1026	1252600798	97.9587
	NW_018735403.1	31194	38485	1.23373	1375	0.224508	1027	1252631992	97.9611
	NW_018735849.1	31181	8458	0.271255	2227	0.0493615	1028	1252663173	97.9636
	NW_018735673.1	31164	67616	2.16968	858	0.394827	1029	1252694337	97.966
	NW_018734550.1	31162	29574	0.94904	1621	0.172701	1030	1252725499	97.9685
	NW_018736159.1	31159	23197	0.744472	1816	0.135475	1031	1252756658	97.9709
	NW_018735907.1	31152	21180	0.679892	1873	0.123723	1032	1252787810	97.9733
	NW_018736491.1	31149	22185	0.712222	1845	0.129606	1033	1252818959	97.9758
	NW_018735276.1	31123	223382	7.17739	53	1.3061	1034	1252850082	97.9782
	NW_018736528.1	31106	22762	0.731756	1830	0.133161	1035	1252881188	97.9806
	NW_018734536.1	31089	110824	3.56473	411	0.648691	1036	1252912277	97.9831
	NW_018735952.1	31087	16765	0.539293	2010	0.0981376	1037	1252943364	97.9855
	NW_018736407.1	31076	218825	7.04161	58	1.28139	1038	1252974440	97.9879
	NW_018734517.1	31073	94533	3.04229	541	0.553619	1039	1253005513	97.9904
	NW_018735507.1	31043	111241	3.58345	406	0.652096	1040	1253036556	97.9928
	NW_018735244.1	31033	44959	1.44875	1239	0.263635	1041	1253067589	97.9952
	NW_018734624.1	31026	69726	2.24734	822	0.408959	1042	1253098615	97.9976
	NW_018735732.1	31013	55417	1.7869	1037	0.32517	1043	1253129628	98.0001
	NW_018734727.1	31010	89787	2.89542	578	0.526893	1044	1253160638	98.0025
	NW_018736415.1	31005	168325	5.42896	143	0.987933	1045	1253191643	98.0049
	NW_018735301.1	30986	26673	0.860808	1680	0.156645	1046	1253222629	98.0073
	NW_018736709.1	30960	53040	1.71318	1085	0.311755	1047	1253253589	98.0098
	NW_018736175.1	30956	15529	0.501648	2038	0.0912871	1048	1253284545	98.0122
	NW_018734451.1	30938	29498	0.953455	1617	0.173505	1049	1253315483	98.0146
	NW_018735855.1	30919	20852	0.674407	1879	0.122725	1050	1253346402	98.017
	NW_018734815.1	30881	19509	0.631748	1931	0.114962	1051	1253377283	98.0194
	NW_018736023.1	30856	98581	3.19487	497	0.581386	1052	1253408139	98.0218
	NW_018735289.1	30855	97112	3.14737	513	0.572741	1053	1253438994	98.0243
	NW_018735387.1	30819	144818	4.69898	226	0.855096	1054	1253469813	98.0267
	NW_018735026.1	30815	39911	1.29518	1339	0.23569	1055	1253500628	98.0291
	NW_018734676.1	30815	22659	0.735324	1827	0.13381	1056	1253531443	98.0315
	NW_018734548.1	30809	143091	4.64445	234	0.845173	1057	1253562252	98.0339
	NW_018735904.1	30809	15846	0.51433	2028	0.093595	1058	1253593061	98.0363
	NW_018735923.1	30787	133098	4.32319	276	0.78671	1059	1253623848	98.0387
	NW_018734893.1	30763	50582	1.64425	1138	0.299211	1060	1253654611	98.0411
	NW_018734565.1	30756	64117	2.0847	901	0.379362	1061	1253685367	98.0435
	NW_018734644.1	30739	98900	3.21741	492	0.585487	1062	1253716106	98.0459
	NW_018736387.1	30737	85020	2.76605	625	0.50335	1063	1253746843	98.0483
	NW_018734407.1	30735	54018	1.75754	1052	0.319828	1064	1253777578	98.0507
	NW_018735054.1	30720	24070	0.783529	1774	0.142582	1065	1253808298	98.0531
	NW_018736384.1	30718	160993	5.241	157	0.953728	1066	1253839016	98.0555
	NW_018736386.1	30700	24636	0.802476	1747	0.14603	1067	1253869716	98.0579
	NW_018734744.1	30690	56162	1.82998	1006	0.333009	1068	1253900406	98.0603
	NW_018735460.1	30664	163760	5.34046	152	0.971829	1069	1253931070	98.0627
	NW_018735981.1	30663	68021	2.21834	834	0.403682	1070	1253961733	98.0651
	NW_018734582.1	30657	41961	1.36872	1292	0.249073	1071	1253992390	98.0675
	NW_018736118.1	30634	67138	2.19162	844	0.398819	1072	1254023024	98.0699
	NW_018734785.1	30600	25906	0.846601	1698	0.15406	1073	1254053624	98.0723
	NW_018736117.1	30598	100875	3.29678	476	0.599931	1074	1254084222	98.0747
	NW_018735075.1	30571	25684	0.840143	1702	0.152885	1075	1254114793	98.0771
	NW_018736710.1	30557	53748	1.75894	1051	0.320083	1076	1254145350	98.0795
	NW_018736119.1	30554	70695	2.31377	793	0.421048	1077	1254175904	98.0819
	NW_018734720.1	30549	25029	0.819307	1728	0.149093	1078	1254206453	98.0843
	NW_018734869.1	30522	52173	1.70936	1086	0.31106	1079	1254236975	98.0867
	NW_018734508.1	30517	46196	1.51378	1201	0.275469	1080	1254267492	98.089
	NW_018736059.1	30508	154156	5.05297	177	0.919512	1081	1254298000	98.0914
	NW_018736519.1	30508	40928	1.34155	1306	0.244128	1082	1254328508	98.0938
	NW_018735159.1	30483	58040	1.90401	972	0.346482	1083	1254358991	98.0962
	NW_018734462.1	30481	38600	1.26636	1360	0.230446	1084	1254389472	98.0986
	NW_018734525.1	30469	23018	0.755456	1805	0.137474	1085	1254419941	98.101
	NW_018735200.1	30464	12759	0.418822	2109	0.076215	1086	1254450405	98.1034
	NW_018734630.1	30455	20737	0.680906	1871	0.123908	1087	1254480860	98.1057
	NW_018736365.1	30440	32699	1.07421	1525	0.195479	1088	1254511300	98.1081
	NW_018735909.1	30436	38746	1.27303	1355	0.231659	1089	1254541736	98.1105
	NW_018735158.1	30404	14565	0.479049	2053	0.0871747	1090	1254572140	98.1129
	NW_018736132.1	30396	13126	0.431833	2093	0.0785826	1091	1254602536	98.1152
	NW_018735593.1	30354	140878	4.64117	236	0.844574	1092	1254632890	98.1176
	NW_018735686.1	30354	55098	1.81518	1016	0.330317	1093	1254663244	98.12
	NW_018735292.1	30344	42355	1.39583	1275	0.254005	1094	1254693588	98.1224
	NW_018735885.1	30332	45822	1.51068	1203	0.274906	1095	1254723920	98.1247
	NW_018734438.1	30262	39526	1.30613	1334	0.237682	1096	1254754182	98.1271
	NW_018735807.1	30256	63369	2.09443	890	0.381133	1097	1254784438	98.1295
	NW_018735757.1	30246	100081	3.3089	472	0.602136	1098	1254814684	98.1318
	NW_018734918.1	30245	6959	0.230088	2245	0.0418701	1099	1254844929	98.1342
	NW_018736496.1	30212	20334	0.673044	1883	0.122477	1100	1254875141	98.1366
	NW_018736544.1	30198	39965	1.32343	1316	0.240831	1101	1254905339	98.1389
	NW_018736274.1	30137	74693	2.47845	738	0.451015	1102	1254935476	98.1413
	NW_018735115.1	30121	14210	0.471764	2056	0.085849	1103	1254965597	98.1436
	NW_018734663.1	30120	17352	0.576096	1979	0.104835	1104	1254995717	98.146
	NW_018734762.1	30117	11600	0.385165	2134	0.0700901	1105	1255025834	98.1484
	NW_018735971.1	30048	68487	2.27925	807	0.414766	1106	1255055882	98.1507
	NW_018734503.1	30044	38670	1.28711	1344	0.234222	1107	1255085926	98.1531
	NW_018735392.1	30028	70221	2.33852	784	0.425551	1108	1255115954	98.1554
	NW_018735009.1	30009	11032	0.367623	2154	0.066898	1109	1255145963	98.1577
	NW_018735120.1	30006	33540	1.11778	1488	0.203407	1110	1255175969	98.1601
	NW_018734532.1	29998	80768	2.69245	659	0.489957	1111	1255205967	98.1624
	NW_018736022.1	29980	100707	3.35914	458	0.611278	1112	1255235947	98.1648
	NW_018736021.1	29978	33294	1.11061	1494	0.202104	1113	1255265925	98.1671
	NW_018734489.1	29972	28227	0.941779	1627	0.17138	1114	1255295897	98.1695
	NW_018736420.1	29955	34583	1.1545	1442	0.210089	1115	1255325852	98.1718
	NW_018735446.1	29936	29367	0.980993	1598	0.178516	1116	1255355788	98.1742
	NW_018736446.1	29929	81770	2.73213	641	0.497179	1117	1255385717	98.1765
	NW_018736286.1	29911	31431	1.05082	1544	0.191222	1118	1255415628	98.1788
	NW_018735166.1	29894	155355	5.19686	163	0.945697	1119	1255445522	98.1812
	NW_018735161.1	29884	33545	1.12251	1480	0.204268	1120	1255475406	98.1835
	NW_018735168.1	29860	52848	1.76986	1046	0.322069	1121	1255505266	98.1858
	NW_018735548.1	29819	85730	2.87501	584	0.523179	1122	1255535085	98.1882
	NW_018736565.1	29791	43521	1.46088	1231	0.265843	1123	1255564876	98.1905
	NW_018734848.1	29778	39582	1.32924	1313	0.241887	1124	1255594654	98.1928
	NW_018736302.1	29776	28207	0.947307	1623	0.172386	1125	1255624430	98.1952
	NW_018735229.1	29768	20028	0.672803	1884	0.122433	1126	1255654198	98.1975
	NW_018736697.1	29755	24680	0.82944	1714	0.150937	1127	1255683953	98.1998
	NW_018736515.1	29749	41958	1.4104	1268	0.256657	1128	1255713702	98.2021
	NW_018734558.1	29735	13582	0.456768	2071	0.0831202	1129	1255743437	98.2045
	NW_018736165.1	29722	38383	1.2914	1341	0.235002	1130	1255773159	98.2068
	NW_018736362.1	29705	88454	2.97775	558	0.541874	1131	1255802864	98.2091
	NW_018736550.1	29683	107959	3.63706	397	0.661853	1132	1255832547	98.2114
	NW_018734745.1	29670	541596	18.254	10	3.32176	1133	1255862217	98.2138
	NW_018736309.1	29670	16430	0.553758	1998	0.10077	1134	1255891887	98.2161
	NW_018735184.1	29663	111349	3.7538	367	0.683096	1135	1255921550	98.2184
	NW_018734544.1	29639	24391	0.822936	1723	0.149753	1136	1255951189	98.2207
	NW_018736708.1	29610	35727	1.20659	1404	0.219568	1137	1255980799	98.223
	NW_018736704.1	29599	51787	1.74962	1057	0.318386	1138	1256010398	98.2253
	NW_018734567.1	29596	18766	0.634072	1928	0.115385	1139	1256039994	98.2277
	NW_018735236.1	29594	37870	1.27965	1353	0.232864	1140	1256069588	98.23
	NW_018735494.1	29575	13415	0.453593	2075	0.0825423	1141	1256099163	98.2323
	NW_018736462.1	29524	42125	1.42681	1259	0.259642	1142	1256128687	98.2346
	NW_018734823.1	29489	35268	1.19597	1413	0.217636	1143	1256158176	98.2369
	NW_018734468.1	29489	28958	0.981993	1597	0.178698	1144	1256187665	98.2392
	NW_018736127.1	29484	41550	1.40924	1270	0.256446	1145	1256217149	98.2415
	NW_018734554.1	29483	18431	0.62514	1939	0.11376	1146	1256246632	98.2438
	NW_018735206.1	29462	10369	0.351945	2171	0.064045	1147	1256276094	98.2461
	NW_018736682.1	29455	28968	0.983466	1595	0.178966	1148	1256305549	98.2484
	NW_018735350.1	29416	26509	0.901176	1655	0.163991	1149	1256334965	98.2507
	NW_018736303.1	29402	72647	2.47082	741	0.449626	1150	1256364367	98.253
	NW_018734948.1	29399	34845	1.18524	1421	0.215684	1151	1256393766	98.2553
	NW_018734486.1	29398	50941	1.7328	1068	0.315326	1152	1256423164	98.2576
	NW_018735398.1	29394	13440	0.457236	2070	0.0832053	1153	1256452558	98.2599
	NW_018736169.1	29393	66593	2.26561	818	0.412283	1154	1256481951	98.2622
	NW_018735779.1	29384	144676	4.92363	190	0.895976	1155	1256511335	98.2645
	NW_018736466.1	29383	24383	0.829834	1713	0.151009	1156	1256540718	98.2668
	NW_018735934.1	29378	63690	2.16795	860	0.394512	1157	1256570096	98.2691
	NW_018736482.1	29378	11735	0.399449	2121	0.0726895	1158	1256599474	98.2714
	NW_018736195.1	29374	25203	0.858004	1687	0.156135	1159	1256628848	98.2737
	NW_018735888.1	29358	104631	3.56397	412	0.648552	1160	1256658206	98.276
	NW_018735127.1	29349	50031	1.70469	1092	0.310211	1161	1256687555	98.2783
	NW_018735385.1	29346	21004	0.715736	1842	0.130246	1162	1256716901	98.2806
	NW_018735286.1	29341	47002	1.60192	1152	0.291509	1163	1256746242	98.2829
	NW_018735025.1	29310	21393	0.729887	1833	0.132821	1164	1256775552	98.2852
	NW_018736125.1	29300	70536	2.40737	759	0.43808	1165	1256804852	98.2875
	NW_018736185.1	29295	33128	1.13084	1469	0.205784	1166	1256834147	98.2898
	NW_018736695.1	29294	10224	0.349013	2173	0.0635116	1167	1256863441	98.2921
	NW_018736049.1	29284	28948	0.988526	1593	0.179887	1168	1256892725	98.2944
	NW_018735738.1	29276	139722	4.77258	210	0.868488	1169	1256922001	98.2966
	NW_018736357.1	29260	44567	1.52314	1193	0.277172	1170	1256951261	98.2989
	NW_018735233.1	29244	29953	1.02424	1567	0.186386	1171	1256980505	98.3012
	NW_018735313.1	29171	32198	1.10377	1502	0.200858	1172	1257009676	98.3035
	NW_018736693.1	29164	32633	1.11895	1485	0.20362	1173	1257038840	98.3058
	NW_018734712.1	29148	138939	4.76667	211	0.867413	1174	1257067988	98.3081
	NW_018736065.1	29144	22426	0.769489	1788	0.140027	1175	1257097132	98.3103
	NW_018734985.1	29110	64460	2.21436	837	0.402957	1176	1257126242	98.3126
	NW_018736655.1	29088	20190	0.694101	1859	0.126309	1177	1257155330	98.3149
	NW_018735377.1	29058	42540	1.46397	1230	0.266405	1178	1257184388	98.3172
	NW_018735555.1	29055	12951	0.445741	2084	0.0811135	1179	1257213443	98.3194
	NW_018736400.1	29050	54756	1.88489	978	0.343002	1180	1257242493	98.3217
	NW_018736190.1	29006	74364	2.56375	710	0.466536	1181	1257271499	98.324
	NW_018736068.1	28995	23481	0.809829	1734	0.147368	1182	1257300494	98.3262
	NW_018734589.1	28988	17933	0.618635	1948	0.112576	1183	1257329482	98.3285
	NW_018736505.1	28984	25540	0.881176	1665	0.160352	1184	1257358466	98.3308
	NW_018734654.1	28976	29345	1.01273	1579	0.184292	1185	1257387442	98.333
	NW_018734523.1	28968	9125	0.315003	2197	0.0573225	1186	1257416410	98.3353
	NW_018736429.1	28957	377423	13.0339	13	2.37184	1187	1257445367	98.3376
	NW_018734734.1	28954	19179	0.662396	1893	0.120539	1188	1257474321	98.3398
	NW_018736134.1	28927	22129	0.764995	1795	0.13921	1189	1257503248	98.3421
	NW_018734414.1	28919	5202	0.179882	2268	0.0327339	1190	1257532167	98.3444
	NW_018735330.1	28894	11749	0.406624	2117	0.0739953	1191	1257561061	98.3466
	NW_018736411.1	28875	33398	1.15664	1440	0.210479	1192	1257589936	98.3489
	NW_018735511.1	28858	56707	1.96504	947	0.357586	1193	1257618794	98.3511
	NW_018736640.1	28858	17321	0.600215	1962	0.109224	1194	1257647652	98.3534
	NW_018735094.1	28851	33584	1.16405	1436	0.211827	1195	1257676503	98.3556
	NW_018734921.1	28840	16576	0.574757	1981	0.104591	1196	1257705343	98.3579
	NW_018736426.1	28830	73653	2.55473	711	0.464897	1197	1257734173	98.3602
	NW_018736092.1	28827	19421	0.673709	1882	0.122598	1198	1257763000	98.3624
	NW_018735696.1	28810	54881	1.90493	971	0.346649	1199	1257791810	98.3647
	NW_018735426.1	28771	24053	0.836015	1708	0.152134	1200	1257820581	98.3669
	NW_018735095.1	28748	59726	2.07757	903	0.378065	1201	1257849329	98.3692
	NW_018734902.1	28745	19763	0.687528	1867	0.125113	1202	1257878074	98.3714
	NW_018736441.1	28745	2095	0.0728822	2291	0.0132627	1203	1257906819	98.3737
	NW_018735227.1	28740	36299	1.26301	1363	0.229836	1204	1257935559	98.3759
	NW_018736540.1	28723	17504	0.609407	1952	0.110897	1205	1257964282	98.3782
	NW_018735665.1	28721	54621	1.90178	974	0.346075	1206	1257993003	98.3804
	NW_018734715.1	28712	60126	2.09411	891	0.381074	1207	1258021715	98.3826
	NW_018736495.1	28697	34669	1.20811	1400	0.219844	1208	1258050412	98.3849
	NW_018735141.1	28689	47759	1.66471	1124	0.302936	1209	1258079101	98.3871
	NW_018735925.1	28665	12712	0.443468	2086	0.0806998	1210	1258107766	98.3894
	NW_018735343.1	28662	19493	0.680099	1872	0.123761	1211	1258136428	98.3916
	NW_018735413.1	28658	31372	1.0947	1512	0.199208	1212	1258165086	98.3939
	NW_018734482.1	28639	20079	0.701107	1852	0.127584	1213	1258193725	98.3961
	NW_018735566.1	28611	14423	0.504107	2036	0.0917346	1214	1258222336	98.3983
	NW_018734912.1	28575	22515	0.787927	1768	0.143383	1215	1258250911	98.4006
	NW_018735513.1	28557	46274	1.62041	1147	0.294873	1216	1258279468	98.4028
	NW_018736047.1	28534	32465	1.13777	1461	0.207044	1217	1258308002	98.405
	NW_018735785.1	28510	48131	1.68821	1105	0.307212	1218	1258336512	98.4073
	NW_018736372.1	28509	29236	1.0255	1566	0.186615	1219	1258365021	98.4095
	NW_018734476.1	28488	31467	1.10457	1500	0.201004	1220	1258393509	98.4117
	NW_018736202.1	28487	22485	0.789307	1763	0.143634	1221	1258421996	98.4139
	NW_018735329.1	28481	6722	0.236017	2241	0.0429491	1222	1258450477	98.4162
	NW_018735478.1	28470	64596	2.26891	816	0.412885	1223	1258478947	98.4184
	NW_018736203.1	28470	47376	1.66407	1125	0.302818	1224	1258507417	98.4206
	NW_018735217.1	28468	39531	1.38861	1282	0.252692	1225	1258535885	98.4229
	NW_018736097.1	28463	109302	3.84014	347	0.698808	1226	1258564348	98.4251
	NW_018734877.1	28448	24471	0.860201	1682	0.156535	1227	1258592796	98.4273
	NW_018735999.1	28445	28995	1.01934	1571	0.185493	1228	1258621241	98.4295
	NW_018736403.1	28439	18630	0.655086	1898	0.119209	1229	1258649680	98.4318
	NW_018736707.1	28422	12961	0.45602	2072	0.082984	1230	1258678102	98.434
	NW_018736197.1	28410	64786	2.28039	806	0.414974	1231	1258706512	98.4362
	NW_018734603.1	28386	13286	0.468048	2061	0.0851728	1232	1258734898	98.4384
	NW_018734760.1	28382	5532	0.194912	2260	0.0354691	1233	1258763280	98.4406
	NW_018735232.1	28379	28792	1.01455	1576	0.184623	1234	1258791659	98.4429
	NW_018734838.1	28375	10775	0.379736	2139	0.0691022	1235	1258820034	98.4451
	NW_018735211.1	28363	10966	0.38663	2131	0.0703569	1236	1258848397	98.4473
	NW_018736223.1	28354	13340	0.47048	2059	0.0856154	1237	1258876751	98.4495
	NW_018735006.1	28344	57319	2.02226	927	0.368	1238	1258905095	98.4517
	NW_018735018.1	28339	22081	0.779174	1779	0.14179	1239	1258933434	98.4539
	NW_018735938.1	28332	163902	5.78505	113	1.05273	1240	1258961766	98.4562
	NW_018736406.1	28326	132426	4.67507	230	0.850744	1241	1258990092	98.4584
	NW_018735008.1	28325	111661	3.94214	333	0.717368	1242	1259018417	98.4606
	NW_018736539.1	28323	20700	0.730855	1831	0.132997	1243	1259046740	98.4628
	NW_018734568.1	28319	73690	2.60214	687	0.473523	1244	1259075059	98.465
	NW_018734627.1	28313	52805	1.86504	993	0.339391	1245	1259103372	98.4672
	NW_018736517.1	28308	21218	0.749541	1811	0.136397	1246	1259131680	98.4694
	NW_018734699.1	28307	23423	0.827463	1717	0.150577	1247	1259159987	98.4717
	NW_018736285.1	28292	31535	1.11463	1491	0.202834	1248	1259188279	98.4739
	NW_018735185.1	28290	24767	0.875468	1673	0.159313	1249	1259216569	98.4761
	NW_018735577.1	28264	90188	3.19091	500	0.580665	1250	1259244833	98.4783
	NW_018736226.1	28261	22227	0.78649	1770	0.143121	1251	1259273094	98.4805
	NW_018736062.1	28255	14830	0.524863	2016	0.0955117	1252	1259301349	98.4827
	NW_018734556.1	28218	33715	1.1948	1415	0.217424	1253	1259329567	98.4849
	NW_018735339.1	28216	20237	0.717217	1839	0.130515	1254	1259357783	98.4871
	NW_018736020.1	28204	44317	1.5713	1166	0.285937	1255	1259385987	98.4893
	NW_018735424.1	28204	32335	1.14647	1453	0.208628	1256	1259414191	98.4915
	NW_018734964.1	28197	85940	3.04784	540	0.55463	1257	1259442388	98.4937
	NW_018735142.1	28188	10793	0.382893	2135	0.0696769	1258	1259470576	98.496
	NW_018735810.1	28182	96446	3.42226	441	0.622763	1259	1259498758	98.4982
	NW_018736456.1	28179	13783	0.489123	2046	0.089008	1260	1259526937	98.5004
	NW_018736227.1	28172	35230	1.25053	1367	0.227565	1261	1259555109	98.5026
	NW_018734520.1	28166	94490	3.35475	460	0.61048	1262	1259583275	98.5048
	NW_018735983.1	28165	63129	2.2414	824	0.407878	1263	1259611440	98.507
	NW_018736665.1	28163	22659	0.804566	1743	0.146411	1264	1259639603	98.5092
	NW_018735576.1	28155	20520	0.728823	1834	0.132627	1265	1259667758	98.5114
	NW_018735963.1	28135	32934	1.17057	1430	0.213014	1266	1259695893	98.5136
	NW_018735980.1	28123	28031	0.996729	1591	0.181379	1267	1259724016	98.5158
	NW_018736367.1	28111	23258	0.827363	1718	0.150559	1268	1259752127	98.518
	NW_018736109.1	28100	33722	1.20007	1409	0.218382	1269	1259780227	98.5202
	NW_018736375.1	28099	21515	0.765686	1793	0.139335	1270	1259808326	98.5224
	NW_018735990.1	28081	136470	4.85987	200	0.884373	1271	1259836407	98.5246
	NW_018736056.1	28071	76077	2.71016	648	0.493181	1272	1259864478	98.5268
	NW_018734826.1	28068	62349	2.22136	831	0.40423	1273	1259892546	98.5289
	NW_018736275.1	28064	17798	0.634193	1927	0.115407	1274	1259920610	98.5311
	NW_018735316.1	28058	23246	0.828498	1715	0.150766	1275	1259948668	98.5333
	NW_018736017.1	28043	44350	1.5815	1163	0.287793	1276	1259976711	98.5355
	NW_018734894.1	28036	38300	1.3661	1295	0.248596	1277	1260004747	98.5377
	NW_018735109.1	28028	62280	2.22206	830	0.404359	1278	1260032775	98.5399
	NW_018734687.1	28006	75127	2.68253	663	0.488153	1279	1260060781	98.5421
	NW_018735225.1	28006	48606	1.73556	1065	0.315827	1280	1260088787	98.5443
	NW_018736465.1	27999	69927	2.49748	734	0.454478	1281	1260116786	98.5465
	NW_018735004.1	27993	30871	1.10281	1503	0.200684	1282	1260144779	98.5487
	NW_018735397.1	27973	5740	0.205198	2257	0.0373408	1283	1260172752	98.5509
	NW_018736522.1	27960	110589	3.95526	331	0.719756	1284	1260200712	98.553
	NW_018735491.1	27951	18887	0.675718	1878	0.122964	1285	1260228663	98.5552
	NW_018735337.1	27947	16127	0.577057	1977	0.10501	1286	1260256610	98.5574
	NW_018736319.1	27920	50484	1.80817	1022	0.32904	1287	1260284530	98.5596
	NW_018735582.1	27919	42414	1.51918	1195	0.276452	1288	1260312449	98.5618
	NW_018736088.1	27916	74438	2.6665	669	0.485235	1289	1260340365	98.564
	NW_018735490.1	27884	10158	0.364295	2160	0.0662924	1290	1260368249	98.5662
	NW_018735821.1	27868	2330	0.0836084	2290	0.0152146	1291	1260396117	98.5683
	NW_018734628.1	27855	12794	0.459307	2068	0.0835822	1292	1260423972	98.5705
	NW_018734901.1	27846	22086	0.793148	1755	0.144333	1293	1260451818	98.5727
	NW_018734595.1	27845	35634	1.27973	1352	0.232878	1294	1260479663	98.5749
	NW_018735175.1	27842	53278	1.91358	969	0.348224	1295	1260507505	98.577
	NW_018736339.1	27827	17942	0.644769	1913	0.117332	1296	1260535332	98.5792
	NW_018734841.1	27827	11563	0.415532	2110	0.0756162	1297	1260563159	98.5814
	NW_018736145.1	27766	39943	1.43856	1253	0.261781	1298	1260590925	98.5836
	NW_018735328.1	27734	14058	0.506887	2034	0.0922405	1299	1260618659	98.5857
	NW_018736414.1	27723	45736	1.64975	1134	0.300212	1300	1260646382	98.5879
	NW_018735181.1	27714	87391	3.15332	510	0.573823	1301	1260674096	98.5901
	NW_018735408.1	27689	19832	0.716241	1840	0.130338	1302	1260701785	98.5922
	NW_018735676.1	27646	18644	0.674383	1880	0.122721	1303	1260729431	98.5944
	NW_018734742.1	27639	34238	1.23876	1374	0.225422	1304	1260757070	98.5966
	NW_018735533.1	27617	5069	0.183546	2265	0.0334008	1305	1260784687	98.5987
	NW_018735586.1	27611	173150	6.27105	87	1.14117	1306	1260812298	98.6009
	NW_018736402.1	27608	32402	1.17365	1429	0.213574	1307	1260839906	98.603
	NW_018734717.1	27607	16595	0.601116	1959	0.109388	1308	1260867513	98.6052
	NW_018736577.1	27601	12138	0.439767	2087	0.0800263	1309	1260895114	98.6074
	NW_018735926.1	27599	13799	0.499982	2040	0.090984	1310	1260922713	98.6095
	NW_018736257.1	27588	54841	1.98786	938	0.361739	1311	1260950301	98.6117
	NW_018734637.1	27534	43770	1.58967	1157	0.28928	1312	1260977835	98.6138
	NW_018734512.1	27522	7006	0.25456	2237	0.0463234	1313	1261005357	98.616
	NW_018735013.1	27520	131687	4.78514	206	0.870773	1314	1261032877	98.6181
	NW_018735932.1	27520	71401	2.59451	691	0.472135	1315	1261060397	98.6203
	NW_018735997.1	27489	778215	28.3101	7	5.15171	1316	1261087886	98.6224
	NW_018736306.1	27489	17588	0.63982	1921	0.116431	1317	1261115375	98.6246
	NW_018735080.1	27482	24692	0.898479	1656	0.1635	1318	1261142857	98.6267
	NW_018736182.1	27467	7756	0.282375	2218	0.0513851	1319	1261170324	98.6289
	NW_018735334.1	27464	82834	3.01609	544	0.548852	1320	1261197788	98.631
	NW_018735107.1	27464	23447	0.853736	1691	0.155358	1321	1261225252	98.6332
	NW_018735834.1	27452	70046	2.55158	714	0.464323	1322	1261252704	98.6353
	NW_018734842.1	27451	11006	0.400933	2120	0.0729595	1323	1261280155	98.6375
	NW_018735993.1	27433	20768	0.757044	1802	0.137763	1324	1261307588	98.6396
	NW_018735383.1	27419	15038	0.548452	2001	0.0998043	1325	1261335007	98.6418
	NW_018736473.1	27412	26657	0.972457	1604	0.176962	1326	1261362419	98.6439
	NW_018734763.1	27404	3939	0.143738	2275	0.0261567	1327	1261389823	98.646
	NW_018734614.1	27398	10236	0.373604	2146	0.0679864	1328	1261417221	98.6482
	NW_018736085.1	27386	13035	0.475973	2055	0.086615	1329	1261444607	98.6503
	NW_018735093.1	27383	18586	0.678742	1874	0.123514	1330	1261471990	98.6525
	NW_018734890.1	27373	9409	0.343733	2177	0.0625506	1331	1261499363	98.6546
	NW_018736356.1	27349	12875	0.470767	2057	0.0856676	1332	1261526712	98.6567
	NW_018736201.1	27348	65103	2.38054	768	0.433198	1333	1261554060	98.6589
	NW_018735435.1	27347	63344	2.31631	791	0.421509	1334	1261581407	98.661
	NW_018735074.1	27334	38838	1.42087	1263	0.258562	1335	1261608741	98.6632
	NW_018735928.1	27319	22800	0.834584	1709	0.151873	1336	1261636060	98.6653
	NW_018735144.1	27313	25124	0.919855	1643	0.16739	1337	1261663373	98.6674
	NW_018736149.1	27285	20628	0.75602	1803	0.137576	1338	1261690658	98.6696
	NW_018735136.1	27281	12186	0.446685	2083	0.0812852	1339	1261717939	98.6717
	NW_018734741.1	27269	29260	1.07301	1526	0.195261	1340	1261745208	98.6738
	NW_018735191.1	27266	20181	0.740153	1822	0.134689	1341	1261772474	98.676
	NW_018735056.1	27251	18236	0.669186	1887	0.121775	1342	1261799725	98.6781
	NW_018734711.1	27238	9986	0.36662	2156	0.0667155	1343	1261826963	98.6802
	NW_018736192.1	27219	27192	0.999008	1588	0.181794	1344	1261854182	98.6824
	NW_018735199.1	27211	91956	3.37937	453	0.614959	1345	1261881393	98.6845
	NW_018735829.1	27210	8249	0.303161	2203	0.0551675	1346	1261908603	98.6866
	NW_018735632.1	27195	37876	1.39276	1277	0.253446	1347	1261935798	98.6887
	NW_018735416.1	27174	46916	1.7265	1075	0.31418	1348	1261962972	98.6909
	NW_018736607.1	27168	29640	1.09099	1515	0.198532	1349	1261990140	98.693
	NW_018734920.1	27155	17686	0.651298	1902	0.11852	1350	1262017295	98.6951
	NW_018734514.1	27130	25500	0.939919	1628	0.171041	1351	1262044425	98.6972
	NW_018734432.1	27129	18558	0.684065	1868	0.124482	1352	1262071554	98.6994
	NW_018734748.1	27118	26431	0.974666	1601	0.177364	1353	1262098672	98.7015
	NW_018734788.1	27118	23743	0.875544	1671	0.159327	1354	1262125790	98.7036
	NW_018734886.1	27107	15371	0.567049	1986	0.103189	1355	1262152897	98.7057
	NW_018735106.1	27101	22443	0.828124	1716	0.150698	1356	1262179998	98.7078
	NW_018734970.1	27076	67696	2.50022	733	0.454977	1357	1262207074	98.71
	NW_018736545.1	27074	58182	2.149	869	0.391063	1358	1262234148	98.7121
	NW_018734997.1	27047	42809	1.58276	1160	0.288023	1359	1262261195	98.7142
	NW_018735587.1	27041	10067	0.372287	2149	0.0677467	1360	1262288236	98.7163
	NW_018735699.1	27016	47546	1.75992	1049	0.320261	1361	1262315252	98.7184
	NW_018735930.1	26992	24363	0.902601	1654	0.16425	1362	1262342244	98.7205
	NW_018734481.1	26984	18088	0.670323	1886	0.121982	1363	1262369228	98.7226
	NW_018735455.1	26965	20647	0.765696	1792	0.139337	1364	1262396193	98.7247
	NW_018734933.1	26961	94363	3.49998	425	0.636908	1365	1262423154	98.7269
	NW_018734858.1	26958	23692	0.878849	1667	0.159928	1366	1262450112	98.729
	NW_018736297.1	26954	168905	6.26642	89	1.14033	1367	1262477066	98.7311
	NW_018735409.1	26949	17904	0.664366	1891	0.120898	1368	1262504015	98.7332
	NW_018736684.1	26947	30859	1.14517	1455	0.208392	1369	1262530962	98.7353
	NW_018734721.1	26934	8834	0.327987	2187	0.0596853	1370	1262557896	98.7374
	NW_018736179.1	26925	10814	0.401634	2119	0.0730872	1371	1262584821	98.7395
	NW_018736358.1	26922	67660	2.51319	726	0.457336	1372	1262611743	98.7416
	NW_018736636.1	26921	11319	0.420452	2108	0.0765116	1373	1262638664	98.7437
	NW_018735016.1	26918	75583	2.8079	610	0.510966	1374	1262665582	98.7458
	NW_018736349.1	26893	31918	1.18685	1420	0.215977	1375	1262692475	98.7479
	NW_018735088.1	26885	39913	1.48458	1215	0.270156	1376	1262719360	98.75
	NW_018735029.1	26883	21104	0.785031	1771	0.142856	1377	1262746243	98.7521
	NW_018736464.1	26875	22843	0.849972	1694	0.154673	1378	1262773118	98.7542
	NW_018735028.1	26871	32459	1.20796	1401	0.219817	1379	1262799989	98.7563
	NW_018734809.1	26857	32736	1.2189	1392	0.221809	1380	1262826846	98.7584
	NW_018734922.1	26846	26138	0.973627	1602	0.177175	1381	1262853692	98.7605
	NW_018736027.1	26837	30277	1.12818	1473	0.2053	1382	1262880529	98.7626
	NW_018736534.1	26826	9672796	360.575	1	65.6155	1383	1262907355	98.7647
	NW_018735325.1	26822	14861	0.55406	1997	0.100825	1384	1262934177	98.7668
	NW_018735090.1	26811	7492	0.279438	2220	0.0508505	1385	1262960988	98.7689
	NW_018736376.1	26808	25382	0.946807	1624	0.172295	1386	1262987796	98.771
	NW_018735962.1	26806	12115	0.451951	2077	0.0822436	1387	1263014602	98.7731
	NW_018735091.1	26768	5847	0.218432	2250	0.0397491	1388	1263041370	98.7752
	NW_018736377.1	26757	19750	0.738125	1825	0.13432	1389	1263068127	98.7773
	NW_018735584.1	26752	69687	2.60493	686	0.47403	1390	1263094879	98.7794
	NW_018735367.1	26747	6830	0.255356	2236	0.0464682	1391	1263121626	98.7815
	NW_018735393.1	26733	14541	0.543934	2005	0.0989822	1392	1263148359	98.7836
	NW_018736422.1	26724	13991	0.523537	2019	0.0952704	1393	1263175083	98.7857
	NW_018736035.1	26696	47353	1.77379	1044	0.322784	1394	1263201779	98.7877
	NW_018736419.1	26688	17907	0.670976	1885	0.122101	1395	1263228467	98.7898
	NW_018735196.1	26684	32421	1.215	1397	0.221099	1396	1263255151	98.7919
	NW_018734443.1	26673	35199	1.31965	1321	0.240143	1397	1263281824	98.794
	NW_018735776.1	26664	63821	2.39353	762	0.435561	1398	1263308488	98.7961
	NW_018736413.1	26661	41858	1.57001	1169	0.285702	1399	1263335149	98.7982
	NW_018736497.1	26660	7830	0.293698	2211	0.0534456	1400	1263361809	98.8003
	NW_018735458.1	26645	19923	0.74772	1814	0.136066	1401	1263388454	98.8023
	NW_018735457.1	26623	25632	0.962777	1608	0.175201	1402	1263415077	98.8044
	NW_018734467.1	26610	38587	1.45009	1237	0.26388	1403	1263441687	98.8065
	NW_018735690.1	26603	108156	4.06556	309	0.739828	1404	1263468290	98.8086
	NW_018735903.1	26589	12211	0.45925	2069	0.0835718	1405	1263494879	98.8107
	NW_018735474.1	26584	11381	0.428115	2098	0.077906	1406	1263521463	98.8127
	NW_018734909.1	26582	198685	7.47442	47	1.36015	1407	1263548045	98.8148
	NW_018734511.1	26577	98563	3.70858	379	0.674868	1408	1263574622	98.8169
	NW_018734761.1	26571	208631	7.85183	37	1.42883	1409	1263601193	98.819
	NW_018734899.1	26545	30967	1.16659	1433	0.212289	1410	1263627738	98.8211
	NW_018735751.1	26545	29226	1.101	1506	0.200354	1411	1263654283	98.8231
	NW_018734954.1	26520	23268	0.877376	1670	0.15966	1412	1263680803	98.8252
	NW_018735308.1	26518	303322	11.4383	18	2.08149	1413	1263707321	98.8273
	NW_018735300.1	26509	51797	1.95394	951	0.355567	1414	1263733830	98.8294
	NW_018734716.1	26505	49752	1.87708	983	0.341581	1415	1263760335	98.8314
	NW_018736036.1	26504	35624	1.3441	1301	0.244592	1416	1263786839	98.8335
	NW_018736112.1	26501	20968	0.791215	1758	0.143981	1417	1263813340	98.8356
	NW_018734891.1	26486	7937	0.299668	2207	0.0545319	1418	1263839826	98.8376
	NW_018735754.1	26475	47315	1.78716	1036	0.325217	1419	1263866301	98.8397
	NW_018736559.1	26462	17167	0.648742	1909	0.118054	1420	1263892763	98.8418
	NW_018735195.1	26456	27435	1.037	1558	0.188708	1421	1263919219	98.8439
	NW_018736215.1	26406	20853	0.789707	1762	0.143707	1422	1263945625	98.8459
	NW_018736263.1	26404	30429	1.15244	1447	0.209715	1423	1263972029	98.848
	NW_018734972.1	26378	14429	0.547009	2004	0.0995417	1424	1263998407	98.85
	NW_018734952.1	26369	21326	0.808753	1737	0.147172	1425	1264024776	98.8521
	NW_018734929.1	26320	124482	4.72956	217	0.860659	1426	1264051096	98.8542
	NW_018735651.1	26320	23769	0.903078	1653	0.164337	1427	1264077416	98.8562
	NW_018734474.1	26317	24622	0.935593	1630	0.170254	1428	1264103733	98.8583
	NW_018735279.1	26292	74292	2.82565	603	0.514196	1429	1264130025	98.8603
	NW_018734974.1	26282	21490	0.81767	1729	0.148795	1430	1264156307	98.8624
	NW_018736279.1	26262	34755	1.3234	1317	0.240824	1431	1264182569	98.8644
	NW_018736051.1	26261	29793	1.1345	1466	0.206449	1432	1264208830	98.8665
	NW_018736284.1	26256	32008	1.21907	1391	0.22184	1433	1264235086	98.8686
	NW_018735105.1	26244	23537	0.896853	1657	0.163204	1434	1264261330	98.8706
	NW_018736176.1	26226	87272	3.32769	469	0.605555	1435	1264287556	98.8727
	NW_018735678.1	26218	129639	4.94466	187	0.899802	1436	1264313774	98.8747
	NW_018734700.1	26210	92284	3.52095	420	0.640723	1437	1264339984	98.8768
	NW_018734752.1	26206	36142	1.37915	1287	0.25097	1438	1264366190	98.8788
	NW_018735635.1	26190	80452	3.07186	536	0.559	1439	1264392380	98.8809
	NW_018734673.1	26187	47704	1.82167	1012	0.331497	1440	1264418567	98.8829
	NW_018736440.1	26177	12523	0.478397	2054	0.0870561	1441	1264444744	98.885
	NW_018736523.1	26162	40826	1.56051	1175	0.283973	1442	1264470906	98.887
	NW_018734998.1	26159	140438	5.36863	148	0.976954	1443	1264497065	98.889
	NW_018736483.1	26156	95637	3.65641	392	0.665373	1444	1264523221	98.8911
	NW_018736416.1	26152	18212	0.69639	1855	0.126725	1445	1264549373	98.8931
	NW_018736409.1	26142	41811	1.59938	1154	0.291047	1446	1264575515	98.8952
	NW_018736256.1	26135	12532	0.47951	2052	0.0872587	1447	1264601650	98.8972
	NW_018734799.1	26130	14614	0.559281	1993	0.101775	1448	1264627780	98.8993
	NW_018735396.1	26125	29552	1.13118	1468	0.205845	1449	1264653905	98.9013
	NW_018734975.1	26111	52231	2.00034	936	0.364012	1450	1264680016	98.9034
	NW_018734478.1	26099	31763	1.21702	1394	0.221467	1451	1264706115	98.9054
	NW_018735079.1	26097	27990	1.07254	1527	0.195174	1452	1264732212	98.9074
	NW_018736133.1	26091	12595	0.482734	2049	0.0878452	1453	1264758303	98.9095
	NW_018736334.1	26088	30382	1.1646	1435	0.211927	1454	1264784391	98.9115
	NW_018736050.1	26086	16738	0.641647	1918	0.116763	1455	1264810477	98.9136
	NW_018734469.1	26078	249665	9.57378	24	1.74218	1456	1264836555	98.9156
	NW_018736622.1	26078	127453	4.88738	197	0.889378	1457	1264862633	98.9176
	NW_018735247.1	26070	35728	1.37046	1289	0.24939	1458	1264888703	98.9197
	NW_018735254.1	26065	18782	0.720583	1836	0.131128	1459	1264914768	98.9217
	NW_018736593.1	26027	64740	2.48742	736	0.452647	1460	1264940795	98.9237
	NW_018734851.1	26021	21342	0.820184	1725	0.149253	1461	1264966816	98.9258
	NW_018734539.1	26005	9724	0.373928	2145	0.0680454	1462	1264992821	98.9278
	NW_018734586.1	26005	8979	0.34528	2176	0.0628321	1463	1265018826	98.9298
	NW_018735662.1	25993	29214	1.12392	1478	0.204524	1464	1265044819	98.9319
	NW_018736048.1	25989	104404	4.01724	316	0.731035	1465	1265070808	98.9339
	NW_018736472.1	25971	17763	0.683955	1869	0.124462	1466	1265096779	98.9359
	NW_018735364.1	25942	43807	1.68865	1104	0.307292	1467	1265122721	98.938
	NW_018736401.1	25937	19754	0.761615	1796	0.138594	1468	1265148658	98.94
	NW_018735089.1	25920	89315	3.44579	434	0.627047	1469	1265174578	98.942
	NW_018736543.1	25918	8552	0.329964	2186	0.060045	1470	1265200496	98.9441
	NW_018735946.1	25915	83705	3.22998	489	0.587775	1471	1265226411	98.9461
	NW_018735899.1	25914	161320	6.22521	94	1.13283	1472	1265252325	98.9481
	NW_018735616.1	25898	96154	3.7128	377	0.675634	1473	1265278223	98.9501
	NW_018735173.1	25892	67006	2.5879	697	0.470933	1474	1265304115	98.9522
	NW_018735190.1	25884	20292	0.783959	1773	0.142661	1475	1265329999	98.9542
	NW_018735677.1	25880	34490	1.33269	1310	0.242516	1476	1265355879	98.9562
	NW_018735404.1	25878	42149	1.62876	1145	0.296393	1477	1265381757	98.9582
	NW_018736090.1	25858	15946	0.616676	1950	0.112219	1478	1265407615	98.9603
	NW_018735447.1	25857	48070	1.85907	996	0.338304	1479	1265433472	98.9623
	NW_018736674.1	25856	32841	1.27015	1357	0.231135	1480	1265459328	98.9643
	NW_018734941.1	25852	30123	1.16521	1434	0.212038	1481	1265485180	98.9663
	NW_018735851.1	25847	201168	7.78303	40	1.41631	1482	1265511027	98.9683
	NW_018735197.1	25818	24971	0.967193	1607	0.176005	1483	1265536845	98.9704
	NW_018736040.1	25805	13377	0.518388	2025	0.0943334	1484	1265562650	98.9724
	NW_018735495.1	25803	60148	2.33105	787	0.424191	1485	1265588453	98.9744
	NW_018735174.1	25797	105061	4.07261	307	0.741111	1486	1265614250	98.9764
	NW_018735786.1	25758	46443	1.80305	1025	0.328109	1487	1265640008	98.9784
	NW_018735096.1	25747	163820	6.36268	84	1.15785	1488	1265665755	98.9804
	NW_018736342.1	25737	8192	0.318297	2194	0.0579219	1489	1265691492	98.9825
	NW_018735631.1	25733	172281	6.69494	67	1.21831	1490	1265717225	98.9845
	NW_018736327.1	25717	21941	0.853171	1692	0.155255	1491	1265742942	98.9865
	NW_018735400.1	25715	20747	0.806805	1740	0.146818	1492	1265768657	98.9885
	NW_018735176.1	25694	40756	1.58621	1159	0.288649	1493	1265794351	98.9905
	NW_018735321.1	25694	14334	0.557873	1994	0.101519	1494	1265820045	98.9925
	NW_018734882.1	25691	19053	0.741622	1820	0.134956	1495	1265845736	98.9945
	NW_018734446.1	25690	28645	1.11503	1490	0.202906	1496	1265871426	98.9965
	NW_018734579.1	25683	34416	1.34003	1307	0.243851	1497	1265897109	98.9985
	NW_018735898.1	25666	13645	0.531637	2013	0.0967444	1498	1265922775	99.0005
	NW_018735681.1	25665	6231	0.242782	2239	0.0441801	1499	1265948440	99.0025
	NW_018734911.1	25662	14625	0.569909	1984	0.103709	1500	1265974102	99.0046
	NW_018735940.1	25646	37059	1.44502	1246	0.262957	1501	1265999748	99.0066
	NW_018735072.1	25618	26860	1.04848	1548	0.190797	1502	1266025366	99.0086
	NW_018736484.1	25594	19407	0.758264	1800	0.137985	1503	1266050960	99.0106
	NW_018734602.1	25592	10616	0.414817	2112	0.0754862	1504	1266076552	99.0126
	NW_018735921.1	25591	44878	1.75366	1054	0.319122	1505	1266102143	99.0146
	NW_018736010.1	25591	19777	0.772811	1784	0.140632	1506	1266127734	99.0166
	NW_018734723.1	25585	44818	1.75173	1056	0.31877	1507	1266153319	99.0186
	NW_018734515.1	25550	12645	0.494912	2041	0.0900614	1508	1266178869	99.0206
	NW_018735027.1	25543	10900	0.426731	2100	0.0776543	1509	1266204412	99.0226
	NW_018735708.1	25517	12992	0.509151	2033	0.0926525	1510	1266229929	99.0246
	NW_018735448.1	25507	23757	0.931391	1633	0.16949	1511	1266255436	99.0266
	NW_018736239.1	25503	6705	0.26291	2233	0.047843	1512	1266280939	99.0285
	NW_018736329.1	25502	69358	2.71971	645	0.494918	1513	1266306441	99.0305
	NW_018734427.1	25500	6780	0.265882	2231	0.0483838	1514	1266331941	99.0325
	NW_018734584.1	25487	22380	0.878095	1668	0.159791	1515	1266357428	99.0345
	NW_018734865.1	25479	29199	1.146	1454	0.208543	1516	1266382907	99.0365
	NW_018734956.1	25473	47976	1.88341	979	0.342732	1517	1266408380	99.0385
	NW_018736444.1	25471	15295	0.600487	1961	0.109273	1518	1266433851	99.0405
	NW_018734962.1	25447	8323	0.327072	2188	0.0595188	1519	1266459298	99.0425
	NW_018734488.1	25436	251350	9.88166	21	1.79821	1520	1266484734	99.0445
	NW_018735441.1	25435	15401	0.605504	1956	0.110186	1521	1266510169	99.0465
	NW_018734665.1	25422	50868	2.00094	935	0.364121	1522	1266535591	99.0485
	NW_018734573.1	25392	25654	1.01032	1580	0.183852	1523	1266560983	99.0504
	NW_018735228.1	25344	5670	0.223722	2249	0.0407116	1524	1266586327	99.0524
	NW_018735527.1	25343	10115	0.399124	2122	0.0726304	1525	1266611670	99.0544
	NW_018735165.1	25323	30951	1.22225	1387	0.222418	1526	1266636993	99.0564
	NW_018735443.1	25313	16861	0.6661	1890	0.121213	1527	1266662306	99.0584
	NW_018735454.1	25284	18910	0.747904	1813	0.136099	1528	1266687590	99.0604
	NW_018736043.1	25282	18504	0.731904	1828	0.133188	1529	1266712872	99.0623
	NW_018736069.1	25271	5281	0.208975	2255	0.0380281	1530	1266738143	99.0643
	NW_018734768.1	25262	96499	3.81993	350	0.69513	1531	1266763405	99.0663
	NW_018734596.1	25262	38763	1.53444	1186	0.279229	1532	1266788667	99.0683
	NW_018736316.1	25242	25674	1.01711	1574	0.185089	1533	1266813909	99.0702
	NW_018734771.1	25234	19076	0.755964	1804	0.137566	1534	1266839143	99.0722
	NW_018735146.1	25223	29076	1.15276	1446	0.209773	1535	1266864366	99.0742
	NW_018734903.1	25217	15750	0.624579	1941	0.113657	1536	1266889583	99.0761
	NW_018734753.1	25186	31436	1.24815	1369	0.227132	1537	1266914769	99.0781
	NW_018734773.1	25161	15575	0.619014	1947	0.112645	1538	1266939930	99.0801
	NW_018736121.1	25150	26136	1.0392	1556	0.189109	1539	1266965080	99.0821
	NW_018735179.1	25138	25117	0.999165	1587	0.181823	1540	1266990218	99.084
	NW_018735941.1	25122	23946	0.953188	1618	0.173456	1541	1267015340	99.086
	NW_018736191.1	25118	95717	3.81069	352	0.693449	1542	1267040458	99.0879
	NW_018736072.1	25103	86347	3.43971	438	0.625939	1543	1267065561	99.0899
	NW_018734834.1	25096	54343	2.1654	864	0.394049	1544	1267090657	99.0919
	NW_018736282.1	25089	68320	2.72311	644	0.495536	1545	1267115746	99.0938
	NW_018736066.1	25076	16183	0.645358	1912	0.117439	1546	1267140822	99.0958
	NW_018735799.1	25066	17395	0.693968	1860	0.126284	1547	1267165888	99.0978
	NW_018736243.1	25061	11373	0.453813	2074	0.0825824	1548	1267190949	99.0997
	NW_018736454.1	25039	33614	1.34247	1303	0.244295	1549	1267215988	99.1017
	NW_018735149.1	25038	5617	0.224339	2248	0.040824	1550	1267241026	99.1036
	NW_018735499.1	25014	149050	5.95866	102	1.08433	1551	1267266040	99.1056
	NW_018735453.1	24978	10642	0.426055	2103	0.0775312	1552	1267291018	99.1075
	NW_018736354.1	24976	38568	1.5442	1183	0.281006	1553	1267315994	99.1095
	NW_018736350.1	24957	26466	1.06046	1536	0.192977	1554	1267340951	99.1114
	NW_018736439.1	24948	17924	0.718454	1838	0.13074	1555	1267365899	99.1134
	NW_018735965.1	24921	37192	1.4924	1211	0.271578	1556	1267390820	99.1153
	NW_018734651.1	24910	9427	0.378442	2142	0.0688669	1557	1267415730	99.1173
	NW_018734755.1	24875	30663	1.23268	1378	0.224317	1558	1267440605	99.1192
	NW_018735440.1	24859	7186	0.28907	2212	0.0526034	1559	1267465464	99.1212
	NW_018736493.1	24848	28919	1.16384	1437	0.211789	1560	1267490312	99.1231
	NW_018734415.1	24835	4759	0.191625	2261	0.0348708	1561	1267515147	99.1251
	NW_018736193.1	24831	15050	0.606097	1954	0.110294	1562	1267539978	99.127
	NW_018736315.1	24817	73782	2.97304	559	0.541018	1563	1267564795	99.129
	NW_018736187.1	24812	40196	1.62002	1148	0.294803	1564	1267589607	99.1309
	NW_018736617.1	24808	70442	2.83949	598	0.516714	1565	1267614415	99.1328
	NW_018735031.1	24794	63092	2.54465	717	0.463061	1566	1267639209	99.1348
	NW_018734479.1	24791	20026	0.807793	1738	0.146998	1567	1267664000	99.1367
	NW_018735132.1	24777	51399	2.07446	905	0.3775	1568	1267688777	99.1386
	NW_018736313.1	24768	28085	1.13392	1467	0.206345	1569	1267713545	99.1406
	NW_018735746.1	24766	10600	0.428006	2099	0.0778862	1570	1267738311	99.1425
	NW_018735110.1	24757	69103	2.79125	615	0.507937	1571	1267763068	99.1445
	NW_018734534.1	24730	19507	0.788799	1764	0.143541	1572	1267787798	99.1464
	NW_018734754.1	24728	7086	0.286558	2214	0.0521462	1573	1267812526	99.1483
	NW_018735719.1	24725	16062	0.649626	1905	0.118215	1574	1267837251	99.1503
	NW_018735423.1	24714	27647	1.11868	1486	0.203571	1575	1267861965	99.1522
	NW_018734807.1	24695	7412	0.300142	2206	0.0546182	1576	1267886660	99.1541
	NW_018734535.1	24678	33040	1.33884	1308	0.243636	1577	1267911338	99.1561
	NW_018735336.1	24673	32243	1.30681	1333	0.237807	1578	1267936011	99.158
	NW_018734792.1	24672	66455	2.69354	657	0.490156	1579	1267960683	99.1599
	NW_018735991.1	24668	13976	0.566564	1988	0.1031	1580	1267985351	99.1618
	NW_018734680.1	24667	13351	0.541249	2008	0.0984936	1581	1268010018	99.1638
	NW_018735133.1	24662	21938	0.889547	1659	0.161875	1582	1268034680	99.1657
	NW_018735332.1	24649	3342	0.135584	2277	0.0246728	1583	1268059329	99.1676
	NW_018735219.1	24642	30243	1.22729	1383	0.223336	1584	1268083971	99.1696
	NW_018735679.1	24634	20333	0.825404	1722	0.150203	1585	1268108605	99.1715
	NW_018735816.1	24609	67672	2.74989	635	0.50041	1586	1268133214	99.1734
	NW_018736511.1	24609	5820	0.236499	2240	0.0430368	1587	1268157823	99.1753
	NW_018735084.1	24579	62765	2.5536	712	0.464691	1588	1268182402	99.1773
	NW_018734872.1	24579	26019	1.05859	1538	0.192636	1589	1268206981	99.1792
	NW_018735873.1	24567	92335	3.7585	365	0.683951	1590	1268231548	99.1811
	NW_018735711.1	24552	66063	2.69074	660	0.489646	1591	1268256100	99.183
	NW_018735135.1	24551	98058	3.99405	327	0.726816	1592	1268280651	99.1849
	NW_018735335.1	24544	16972	0.691493	1864	0.125834	1593	1268305195	99.1869
	NW_018735376.1	24540	14122	0.575469	1980	0.104721	1594	1268329735	99.1888
	NW_018735602.1	24529	103434	4.2168	293	0.767351	1595	1268354264	99.1907
	NW_018735338.1	24501	73746	3.00992	545	0.547728	1596	1268378765	99.1926
	NW_018735104.1	24501	19181	0.782866	1776	0.142462	1597	1268403266	99.1945
	NW_018734430.1	24487	37662	1.53804	1185	0.279884	1598	1268427753	99.1964
	NW_018734471.1	24481	79641	3.25318	480	0.591995	1599	1268452234	99.1984
	NW_018735298.1	24472	13391	0.547197	2002	0.0995759	1600	1268476706	99.2003
	NW_018736451.1	24445	65368	2.67408	666	0.486615	1601	1268501151	99.2022
	NW_018735806.1	24422	69448	2.84367	597	0.517475	1602	1268525573	99.2041
	NW_018735601.1	24408	54068	2.21518	836	0.403106	1603	1268549981	99.206
	NW_018736333.1	24380	42461	1.74163	1063	0.316933	1604	1268574361	99.2079
	NW_018735342.1	24335	52854	2.17193	857	0.395237	1605	1268598696	99.2098
	NW_018734445.1	24332	74781	3.07336	535	0.559273	1606	1268623028	99.2117
	NW_018734943.1	24321	15670	0.644299	1914	0.117246	1607	1268647349	99.2136
	NW_018735702.1	24312	31359	1.28986	1342	0.234721	1608	1268671661	99.2155
	NW_018735772.1	24293	27593	1.13584	1465	0.206694	1609	1268695954	99.2174
	NW_018736526.1	24289	24778	1.02013	1570	0.185638	1610	1268720243	99.2193
	NW_018736366.1	24287	30137	1.24087	1373	0.225807	1611	1268744530	99.2212
	NW_018736398.1	24263	29555	1.21811	1393	0.221665	1612	1268768793	99.2231
	NW_018735355.1	24259	10451	0.430809	2095	0.0783963	1613	1268793052	99.225
	NW_018735498.1	24259	5213	0.214889	2253	0.0391044	1614	1268817311	99.2269
	NW_018736463.1	24256	78255	3.22621	490	0.587088	1615	1268841567	99.2288
	NW_018736675.1	24245	31240	1.28851	1343	0.234477	1616	1268865812	99.2307
	NW_018736028.1	24241	50692	2.09117	895	0.380539	1617	1268890053	99.2326
	NW_018735660.1	24232	9235	0.381108	2137	0.0693519	1618	1268914285	99.2345
	NW_018735473.1	24223	6616	0.273129	2225	0.0497025	1619	1268938508	99.2364
	NW_018735147.1	24207	29800	1.23105	1380	0.22402	1620	1268962715	99.2383
	NW_018734569.1	24204	129855	5.36502	149	0.976298	1621	1268986919	99.2402
	NW_018734953.1	24181	19761	0.817212	1731	0.148712	1622	1269011100	99.2421
	NW_018736220.1	24177	4720	0.195227	2259	0.0355263	1623	1269035277	99.244
	NW_018736264.1	24167	94130	3.89498	342	0.708787	1624	1269059444	99.2458
	NW_018735384.1	24151	2031	0.0840959	2289	0.0153033	1625	1269083595	99.2477
	NW_018735580.1	24146	27431	1.13605	1464	0.206732	1626	1269107741	99.2496
	NW_018736548.1	24138	25809	1.06923	1528	0.194572	1627	1269131879	99.2515
	NW_018734775.1	24126	21333	0.884233	1661	0.160908	1628	1269156005	99.2534
	NW_018736126.1	24115	12679	0.525772	2014	0.0956772	1629	1269180120	99.2553
	NW_018735436.1	24060	34923	1.4515	1236	0.264135	1630	1269204180	99.2572
	NW_018734750.1	24043	38901	1.61798	1149	0.29443	1631	1269228223	99.259
	NW_018736013.1	24027	45021	1.87377	988	0.340978	1632	1269252250	99.2609
	NW_018735664.1	24010	106182	4.42241	258	0.804766	1633	1269276260	99.2628
	NW_018735407.1	23996	41463	1.72791	1073	0.314436	1634	1269300256	99.2647
	NW_018736527.1	23973	40486	1.68882	1103	0.307322	1635	1269324229	99.2665
	NW_018735604.1	23954	54411	2.27148	813	0.413351	1636	1269348183	99.2684
	NW_018736135.1	23951	7778	0.324746	2191	0.0590956	1637	1269372134	99.2703
	NW_018734538.1	23927	3236	0.135245	2278	0.0246111	1638	1269396061	99.2722
	NW_018735639.1	23920	12191	0.509657	2032	0.0927446	1639	1269419981	99.274
	NW_018735201.1	23862	20540	0.860783	1681	0.156641	1640	1269443843	99.2759
	NW_018735929.1	23846	2594	0.108781	2284	0.0197954	1641	1269467689	99.2778
	NW_018734507.1	23836	41165	1.72701	1074	0.314272	1642	1269491525	99.2796
	NW_018736262.1	23824	27618	1.15925	1439	0.210954	1643	1269515349	99.2815
	NW_018736067.1	23811	19173	0.805216	1741	0.146529	1644	1269539160	99.2834
	NW_018736267.1	23807	24376	1.0239	1568	0.186324	1645	1269562967	99.2852
	NW_018735358.1	23805	31477	1.32229	1318	0.240622	1646	1269586772	99.2871
	NW_018736677.1	23795	46400	1.94999	952	0.354848	1647	1269610567	99.2889
	NW_018735545.1	23782	37966	1.59642	1156	0.290507	1648	1269634349	99.2908
	NW_018735636.1	23769	24870	1.04632	1549	0.190404	1649	1269658118	99.2927
	NW_018735333.1	23755	16019	0.674342	1881	0.122713	1650	1269681873	99.2945
	NW_018735641.1	23747	112014	4.71697	223	0.858369	1651	1269705620	99.2964
	NW_018736688.1	23722	69729	2.93942	566	0.5349	1652	1269729342	99.2982
	NW_018734993.1	23721	21942	0.925003	1640	0.168327	1653	1269753063	99.3001
	NW_018736030.1	23700	20321	0.857426	1688	0.15603	1654	1269776763	99.3019
	NW_018736308.1	23698	14232	0.600557	1960	0.109286	1655	1269800461	99.3038
	NW_018736395.1	23687	4052	0.171064	2270	0.0311293	1656	1269824148	99.3056
	NW_018734457.1	23670	25134	1.06185	1534	0.19323	1657	1269847818	99.3075
	NW_018736034.1	23655	13409	0.566857	1987	0.103154	1658	1269871473	99.3093
	NW_018736510.1	23641	103065	4.35959	269	0.793334	1659	1269895114	99.3112
	NW_018734798.1	23631	10286	0.435276	2088	0.0792091	1660	1269918745	99.313
	NW_018736298.1	23629	7005	0.296458	2208	0.0539478	1661	1269942374	99.3149
	NW_018736541.1	23622	9545	0.404072	2118	0.0735309	1662	1269965996	99.3167
	NW_018735007.1	23564	7220	0.3064	2200	0.0557569	1663	1269989560	99.3186
	NW_018734864.1	23556	128001	5.4339	142	0.988832	1664	1270013116	99.3204
	NW_018736551.1	23518	11611	0.493707	2043	0.0898421	1665	1270036634	99.3223
	NW_018735625.1	23515	157002	6.67667	69	1.21498	1666	1270060149	99.3241
	NW_018735951.1	23457	6332	0.269941	2228	0.0491223	1667	1270083606	99.3259
	NW_018736143.1	23451	21742	0.927125	1637	0.168713	1668	1270107057	99.3278
	NW_018736310.1	23415	33384	1.42575	1261	0.259451	1669	1270130472	99.3296
	NW_018734643.1	23399	6295	0.269029	2229	0.0489564	1670	1270153871	99.3314
	NW_018736488.1	23386	7464	0.319165	2193	0.05808	1671	1270177257	99.3333
	NW_018736520.1	23331	7952	0.340834	2181	0.0620231	1672	1270200588	99.3351
	NW_018735119.1	23305	27909	1.19755	1411	0.217924	1673	1270223893	99.3369
	NW_018735804.1	23304	63530	2.72614	643	0.496088	1674	1270247197	99.3387
	NW_018736012.1	23297	12179	0.522771	2020	0.095131	1675	1270270494	99.3405
	NW_018735263.1	23291	19922	0.855352	1690	0.155652	1676	1270293785	99.3424
	NW_018735395.1	23280	9931	0.426589	2102	0.0776284	1677	1270317065	99.3442
	NW_018736514.1	23259	30272	1.30152	1337	0.236843	1678	1270340324	99.346
	NW_018735092.1	23228	15756	0.678319	1875	0.123437	1679	1270363552	99.3478
	NW_018736373.1	23212	1636697	70.5108	3	12.8312	1680	1270386764	99.3496
	NW_018736508.1	23178	24561	1.05967	1537	0.192833	1681	1270409942	99.3515
	NW_018735985.1	23173	40768	1.75929	1050	0.320146	1682	1270433115	99.3533
	NW_018736538.1	23167	760261	32.8165	5	5.97178	1683	1270456282	99.3551
	NW_018735317.1	23161	42729	1.84487	1000	0.335719	1684	1270479443	99.3569
	NW_018735445.1	23143	17092	0.738539	1824	0.134395	1685	1270502586	99.3587
	NW_018735599.1	23129	48367	2.09118	894	0.380542	1686	1270525715	99.3605
	NW_018734638.1	23069	12098	0.524427	2017	0.0954323	1687	1270548784	99.3623
	NW_018734647.1	23050	82417	3.57557	407	0.650664	1688	1270571834	99.3641
	NW_018734973.1	23007	71765	3.11927	520	0.567627	1689	1270594841	99.3659
	NW_018734833.1	22981	79143	3.44384	435	0.626692	1690	1270617822	99.3677
	NW_018736325.1	22981	66474	2.89256	579	0.526373	1691	1270640803	99.3695
	NW_018735825.1	22961	53480	2.32917	788	0.423849	1692	1270663764	99.3713
	NW_018736535.1	22948	25208	1.09848	1508	0.199896	1693	1270686712	99.3731
	NW_018734888.1	22932	139578	6.0866	97	1.10761	1694	1270709644	99.3749
	NW_018736055.1	22918	41632	1.81656	1014	0.330568	1695	1270732562	99.3767
	NW_018736421.1	22906	28917	1.26242	1364	0.229728	1696	1270755468	99.3785
	NW_018736630.1	22870	29356	1.2836	1348	0.233583	1697	1270778338	99.3803
	NW_018734916.1	22847	16968	0.74268	1819	0.135149	1698	1270801185	99.3821
	NW_018734555.1	22818	21336	0.935051	1631	0.170156	1699	1270824003	99.3838
	NW_018736537.1	22817	47265	2.07148	908	0.376957	1700	1270846820	99.3856
	NW_018735759.1	22804	11737	0.51469	2027	0.0936606	1701	1270869624	99.3874
	NW_018736662.1	22775	31606	1.38775	1283	0.252535	1702	1270892399	99.3892
	NW_018735017.1	22763	37976	1.66832	1121	0.303592	1703	1270915162	99.391
	NW_018736082.1	22748	33354	1.46624	1226	0.266818	1704	1270937910	99.3927
	NW_018735071.1	22748	14776	0.649552	1906	0.118202	1705	1270960658	99.3945
	NW_018734849.1	22737	97558	4.29072	284	0.780801	1706	1270983395	99.3963
	NW_018735215.1	22727	63848	2.80935	608	0.511229	1707	1271006122	99.3981
	NW_018735157.1	22699	12235	0.539011	2011	0.0980862	1708	1271028821	99.3999
	NW_018735374.1	22645	92512	4.08532	304	0.743424	1709	1271051466	99.4016
	NW_018735811.1	22615	60803	2.68861	661	0.489259	1710	1271074081	99.4034
	NW_018735613.1	22592	29070	1.28674	1345	0.234154	1711	1271096673	99.4052
	NW_018735238.1	22587	8078	0.357639	2165	0.0650813	1712	1271119260	99.4069
	NW_018736553.1	22565	218849	9.6986	23	1.7649	1713	1271141825	99.4087
	NW_018736460.1	22561	26510	1.17504	1427	0.213827	1714	1271164386	99.4105
	NW_018735607.1	22531	2111	0.0936931	2286	0.0170498	1715	1271186917	99.4122
	NW_018734995.1	22505	46593	2.07034	909	0.376749	1716	1271209422	99.414
	NW_018735034.1	22485	16817	0.747921	1812	0.136103	1717	1271231907	99.4157
	NW_018734905.1	22450	15592	0.694521	1857	0.126385	1718	1271254357	99.4175
	NW_018735630.1	22429	17289	0.770832	1787	0.140272	1719	1271276786	99.4192
	NW_018734470.1	22416	14232	0.634904	1925	0.115536	1720	1271299202	99.421
	NW_018735748.1	22353	69326	3.10142	526	0.564379	1721	1271321555	99.4227
	NW_018736207.1	22332	35344	1.58266	1161	0.288004	1722	1271343887	99.4245
	NW_018736546.1	22291	13412	0.601678	1957	0.10949	1723	1271366178	99.4262
	NW_018736424.1	22273	9598	0.430925	2094	0.0784174	1724	1271388451	99.428
	NW_018735277.1	22267	18987	0.852697	1693	0.155169	1725	1271410718	99.4297
	NW_018736388.1	22246	97165	4.36775	266	0.79482	1726	1271432964	99.4315
	NW_018736598.1	22246	17291	0.777263	1781	0.141442	1727	1271455210	99.4332
	NW_018734690.1	22227	17374	0.781662	1777	0.142243	1728	1271477437	99.4349
	NW_018736253.1	22214	32986	1.48492	1214	0.270218	1729	1271499651	99.4367
	NW_018736057.1	22213	37791	1.7013	1094	0.309593	1730	1271521864	99.4384
	NW_018736601.1	22194	49996	2.25268	821	0.409931	1731	1271544058	99.4401
	NW_018734518.1	22176	21215	0.956665	1613	0.174089	1732	1271566234	99.4419
	NW_018735994.1	22172	25211	1.13706	1462	0.206917	1733	1271588406	99.4436
	NW_018735087.1	22171	13792	0.622074	1944	0.113202	1734	1271610577	99.4453
	NW_018734426.1	22171	5842	0.263497	2232	0.0479498	1735	1271632748	99.4471
	NW_018735425.1	22106	7830	0.354202	2169	0.0644558	1736	1271654854	99.4488
	NW_018735953.1	22084	5057	0.228989	2246	0.0416702	1737	1271676938	99.4505
	NW_018735780.1	22080	17549	0.794792	1754	0.144632	1738	1271699018	99.4523
	NW_018735546.1	22076	74885	3.39215	450	0.617284	1739	1271721094	99.454
	NW_018735720.1	22067	88295	4.00122	322	0.728121	1740	1271743161	99.4557
	NW_018734987.1	22018	59415	2.69847	653	0.491054	1741	1271765179	99.4574
	NW_018736073.1	22017	19915	0.904528	1651	0.164601	1742	1271787196	99.4592
	NW_018734634.1	21996	9111	0.414212	2113	0.075376	1743	1271809192	99.4609
	NW_018734493.1	21944	10282	0.468556	2060	0.0852653	1744	1271831136	99.4626
	NW_018734703.1	21938	27423	1.25002	1368	0.227472	1745	1271853074	99.4643
	NW_018736569.1	21927	75311	3.43462	439	0.625014	1746	1271875001	99.466
	NW_018736052.1	21913	22195	1.01287	1578	0.184316	1747	1271896914	99.4677
	NW_018735820.1	21881	81800	3.7384	372	0.680294	1748	1271918795	99.4695
	NW_018734477.1	21876	23019	1.05225	1542	0.191483	1749	1271940671	99.4712
	NW_018736347.1	21865	22433	1.02598	1565	0.186702	1750	1271962536	99.4729
	NW_018734887.1	21849	31317	1.43334	1258	0.260831	1751	1271984385	99.4746
	NW_018735108.1	21813	36866	1.69009	1102	0.307554	1752	1272006198	99.4763
	NW_018734931.1	21793	24626	1.13	1471	0.20563	1753	1272027991	99.478
	NW_018735294.1	21744	26230	1.20631	1405	0.219518	1754	1272049735	99.4797
	NW_018735271.1	21743	9416	0.433059	2091	0.0788057	1755	1272071478	99.4814
	NW_018735995.1	21696	124208	5.72493	121	1.04179	1756	1272093174	99.4831
	NW_018735767.1	21691	49566	2.2851	805	0.415829	1757	1272114865	99.4848
	NW_018734541.1	21690	18065	0.832872	1711	0.151562	1758	1272136555	99.4865
	NW_018735544.1	21681	25620	1.18168	1423	0.215036	1759	1272158236	99.4882
	NW_018736574.1	21639	11127	0.51421	2029	0.0935732	1760	1272179875	99.4899
	NW_018734947.1	21609	30769	1.4239	1262	0.259113	1761	1272201484	99.4916
	NW_018734862.1	21603	49699	2.30056	800	0.418643	1762	1272223087	99.4933
	NW_018735944.1	21535	8187	0.380172	2138	0.0691816	1763	1272244622	99.4949
	NW_018735646.1	21504	56775	2.64021	677	0.48045	1764	1272266126	99.4966
	NW_018735331.1	21503	17034	0.792169	1757	0.144155	1765	1272287629	99.4983
	NW_018735695.1	21481	68189	3.17439	503	0.577658	1766	1272309110	99.5
	NW_018736000.1	21477	39171	1.82386	1009	0.331896	1767	1272330587	99.5017
	NW_018736575.1	21474	62674	2.9186	571	0.531111	1768	1272352061	99.5033
	NW_018736450.1	21437	18198	0.848906	1695	0.154479	1769	1272373498	99.505
	NW_018735709.1	21423	52266	2.43971	747	0.443966	1770	1272394921	99.5067
	NW_018736647.1	21415	28542	1.3328	1309	0.242536	1771	1272416336	99.5084
	NW_018736486.1	21385	49364	2.30835	794	0.42006	1772	1272437721	99.51
	NW_018734812.1	21324	18571	0.870897	1674	0.158481	1773	1272459045	99.5117
	NW_018736588.1	21262	20629	0.970229	1606	0.176557	1774	1272480307	99.5134
	NW_018735067.1	21247	67201	3.16285	505	0.575558	1775	1272501554	99.515
	NW_018734786.1	21231	12254	0.577175	1976	0.105031	1776	1272522785	99.5167
	NW_018736626.1	21220	90677	4.27319	285	0.777611	1777	1272544005	99.5183
	NW_018736609.1	21194	13881	0.65495	1899	0.119184	1778	1272565199	99.52
	NW_018734662.1	21172	7816	0.369167	2151	0.067179	1779	1272586371	99.5217
	NW_018735303.1	21135	19564	0.925668	1639	0.168448	1780	1272607506	99.5233
	NW_018736326.1	21123	53151	2.51626	723	0.457896	1781	1272628629	99.525
	NW_018736389.1	21104	47821	2.26597	817	0.412349	1782	1272649733	99.5266
	NW_018735360.1	21092	34731	1.64664	1136	0.299647	1783	1272670825	99.5283
	NW_018734724.1	21064	25977	1.23324	1376	0.224419	1784	1272691889	99.5299
	NW_018735293.1	21006	15977	0.760592	1798	0.138408	1785	1272712895	99.5316
	NW_018736542.1	20987	17148	0.817077	1732	0.148687	1786	1272733882	99.5332
	NW_018735760.1	20985	70855	3.37646	455	0.61443	1787	1272754867	99.5348
	NW_018735802.1	20962	15819	0.754651	1806	0.137327	1788	1272775829	99.5365
	NW_018736660.1	20949	63506	3.03146	542	0.551648	1789	1272796778	99.5381
	NW_018734861.1	20929	45975	2.19671	843	0.399746	1790	1272817707	99.5398
	NW_018734837.1	20915	36192	1.73043	1070	0.314895	1791	1272838622	99.5414
	NW_018736217.1	20911	6625	0.316819	2196	0.057653	1792	1272859533	99.543
	NW_018735692.1	20904	71377	3.41451	445	0.621355	1793	1272880437	99.5447
	NW_018735753.1	20903	59777	2.85973	591	0.520399	1794	1272901340	99.5463
	NW_018735010.1	20891	134612	6.44354	79	1.17256	1795	1272922231	99.5479
	NW_018735571.1	20881	73826	3.53556	417	0.643382	1796	1272943112	99.5496
	NW_018734522.1	20871	90880	4.35437	270	0.792384	1797	1272963983	99.5512
	NW_018734566.1	20849	19339	0.927574	1636	0.168795	1798	1272984832	99.5528
	NW_018736615.1	20835	6797	0.32623	2190	0.0593655	1799	1273005667	99.5545
	NW_018734990.1	20801	7099	0.341282	2180	0.0621046	1800	1273026468	99.5561
	NW_018736071.1	20788	16314	0.78478	1772	0.14281	1801	1273047256	99.5577
	NW_018736608.1	20732	4466	0.215416	2252	0.0392002	1802	1273067988	99.5593
	NW_018736258.1	20708	3529	0.170417	2271	0.0310116	1803	1273088696	99.5609
	NW_018735304.1	20706	18980	0.916643	1644	0.166806	1804	1273109402	99.5626
	NW_018734897.1	20703	52480	2.5349	721	0.461287	1805	1273130105	99.5642
	NW_018736641.1	20606	23496	1.14025	1458	0.207497	1806	1273150711	99.5658
	NW_018735496.1	20599	14447	0.701345	1851	0.127627	1807	1273171310	99.5674
	NW_018735193.1	20536	53239	2.59247	692	0.471764	1808	1273191846	99.569
	NW_018736054.1	20527	47563	2.31709	790	0.421652	1809	1273212373	99.5706
	NW_018735713.1	20525	25072	1.22153	1388	0.222288	1810	1273232898	99.5722
	NW_018735326.1	20503	29631	1.4452	1245	0.26299	1811	1273253401	99.5738
	NW_018734668.1	20492	33814	1.65011	1133	0.300278	1812	1273273893	99.5754
	NW_018736431.1	20470	5284	0.258134	2235	0.0469738	1813	1273294363	99.577
	NW_018735467.1	20453	15145	0.740478	1821	0.134748	1814	1273314816	99.5786
	NW_018736324.1	20409	170798	8.36876	34	1.5229	1815	1273335225	99.5802
	NW_018735516.1	20404	97828	4.79455	205	0.872486	1816	1273355629	99.5818
	NW_018734678.1	20402	14115	0.691844	1863	0.125898	1817	1273376031	99.5834
	NW_018735892.1	20390	19422	0.952526	1619	0.173335	1818	1273396421	99.585
	NW_018735192.1	20376	9433	0.462947	2066	0.0842445	1819	1273416797	99.5866
	NW_018734571.1	20301	75592	3.72356	374	0.677593	1820	1273437098	99.5882
	NW_018736712.1	20285	52095	2.56815	707	0.467339	1821	1273457383	99.5898
	NW_018736374.1	20282	36008	1.77537	1041	0.323072	1822	1273477665	99.5914
	NW_018735318.1	20281	16226	0.800059	1750	0.14559	1823	1273497946	99.5929
	NW_018735187.1	20255	3686	0.18198	2266	0.0331157	1824	1273518201	99.5945
	NW_018735352.1	20221	2371	0.117254	2282	0.0213373	1825	1273538422	99.5961
	NW_018736344.1	20216	16365	0.809507	1735	0.14731	1826	1273558638	99.5977
	NW_018734494.1	20203	15241	0.754393	1807	0.13728	1827	1273578841	99.5993
	NW_018735832.1	20168	51969	2.5768	701	0.468913	1828	1273599009	99.6009
	NW_018735575.1	20089	7854	0.39096	2126	0.0711448	1829	1273619098	99.6024
	NW_018734599.1	20019	25326	1.2651	1361	0.230216	1830	1273639117	99.604
	NW_018735745.1	19999	28965	1.44832	1241	0.263558	1831	1273659116	99.6056
	NW_018735614.1	19981	12814	0.641309	1919	0.116702	1832	1273679097	99.6071
	NW_018735758.1	19942	41467	2.07938	902	0.378394	1833	1273699039	99.6087
	NW_018735722.1	19917	35982	1.8066	1023	0.328755	1834	1273718956	99.6102
	NW_018735869.1	19887	45210	2.27334	812	0.413691	1835	1273738843	99.6118
	NW_018735769.1	19829	80028	4.03591	312	0.734432	1836	1273758672	99.6133
	NW_018735822.1	19822	9275	0.467914	2062	0.0851485	1837	1273778494	99.6149
	NW_018735724.1	19809	34941	1.7639	1047	0.320984	1838	1273798303	99.6164
	NW_018736006.1	19710	17128	0.869001	1675	0.158136	1839	1273818013	99.618
	NW_018735657.1	19559	53061	2.71287	647	0.493673	1840	1273837572	99.6195
	NW_018735688.1	19557	75163	3.84328	346	0.699379	1841	1273857129	99.621
	NW_018735605.1	19535	25002	1.27986	1351	0.232901	1842	1273876664	99.6226
	NW_018735847.1	19534	46344	2.37248	771	0.431731	1843	1273896198	99.6241
	NW_018735583.1	19498	73880	3.78911	360	0.689521	1844	1273915696	99.6256
	NW_018735572.1	19484	13413	0.688411	1866	0.125273	1845	1273935180	99.6271
	NW_018735554.1	19445	18018	0.926614	1638	0.16862	1846	1273954625	99.6287
	NW_018734740.1	19404	22908	1.18058	1424	0.214836	1847	1273974029	99.6302
	NW_018735541.1	19372	5374	0.277411	2223	0.0504817	1848	1273993401	99.6317
	NW_018735882.1	19358	14526	0.750387	1810	0.136551	1849	1274012759	99.6332
	NW_018735537.1	19253	37195	1.93191	959	0.351558	1850	1274032012	99.6347
	NW_018734448.1	19240	211600	10.9979	19	2.00134	1851	1274051252	99.6362
	NW_018735563.1	19222	66574	3.46343	430	0.630256	1852	1274070474	99.6377
	NW_018735234.1	19219	116217	6.04698	99	1.1004	1853	1274089693	99.6392
	NW_018735875.1	19168	29304	1.5288	1190	0.278202	1854	1274108861	99.6407
	NW_018735723.1	19124	7020	0.367078	2155	0.0667989	1855	1274127985	99.6422
	NW_018735503.1	19100	18339	0.960157	1612	0.174724	1856	1274147085	99.6437
	NW_018736238.1	19087	32326	1.69361	1099	0.308195	1857	1274166172	99.6452
	NW_018734757.1	19073	91070	4.77481	209	0.868894	1858	1274185245	99.6467
	NW_018735734.1	19013	14692	0.772734	1785	0.140618	1859	1274204258	99.6482
	NW_018735659.1	18998	16676	0.877777	1669	0.159733	1860	1274223256	99.6497
	NW_018735618.1	18966	13268	0.699568	1853	0.127304	1861	1274242222	99.6512
	NW_018735854.1	18949	7330	0.386828	2129	0.0703928	1862	1274261171	99.6526
	NW_018735727.1	18901	39667	2.09867	885	0.381905	1863	1274280072	99.6541
	NW_018735845.1	18885	3419	0.181043	2267	0.0329452	1864	1274298957	99.6556
	NW_018735532.1	18882	18177	0.962663	1609	0.17518	1865	1274317839	99.6571
	NW_018735606.1	18881	18006	0.953657	1616	0.173541	1866	1274336720	99.6585
	NW_018735863.1	18862	87877	4.65894	231	0.847809	1867	1274355582	99.66
	NW_018735648.1	18830	20029	1.06367	1531	0.193562	1868	1274374412	99.6615
	NW_018735617.1	18778	22088	1.17627	1426	0.214051	1869	1274393190	99.663
	NW_018735152.1	18778	17649	0.939876	1629	0.171034	1870	1274411968	99.6644
	NW_018735126.1	18737	1529968	81.6549	2	14.8591	1871	1274430705	99.6659
	NW_018735611.1	18718	15047	0.803879	1745	0.146285	1872	1274449423	99.6674
	NW_018736694.1	18633	31269	1.67815	1111	0.305381	1873	1274468056	99.6688
	NW_018735653.1	18560	14671	0.790463	1761	0.143844	1874	1274486616	99.6703
	NW_018735693.1	18467	15512	0.839985	1703	0.152856	1875	1274505083	99.6717
	NW_018735552.1	18451	7283	0.394721	2124	0.0718292	1876	1274523534	99.6732
	NW_018735608.1	18355	6168	0.336039	2183	0.0611506	1877	1274541889	99.6746
	NW_018735859.1	18319	66063	3.60626	400	0.656247	1878	1274560208	99.676
	NW_018735830.1	18225	141874	7.78458	39	1.4166	1879	1274578433	99.6774
	NW_018735733.1	18143	25325	1.39586	1274	0.25401	1880	1274596576	99.6789
	NW_018735621.1	18137	6754	0.372388	2147	0.0677651	1881	1274614713	99.6803
	NW_018735707.1	18103	11453	0.632658	1929	0.115128	1882	1274632816	99.6817
	NW_018736653.1	18074	13688	0.757331	1801	0.137815	1883	1274650890	99.6831
	NW_018734465.1	18023	84981	4.71514	224	0.858036	1884	1274668913	99.6845
	NW_018736229.1	18020	81720	4.53496	248	0.825248	1885	1274686933	99.6859
	NW_018735553.1	18005	101094	5.61477	126	1.02175	1886	1274704938	99.6873
	NW_018735694.1	17980	39318	2.18676	847	0.397935	1887	1274722918	99.6887
	NW_018735590.1	17898	11240	0.628003	1935	0.114281	1888	1274740816	99.6901
	NW_018735539.1	17897	17590	0.982846	1596	0.178853	1889	1274758713	99.6915
	NW_018735667.1	17878	40660	2.2743	810	0.413865	1890	1274776591	99.6929
	NW_018735037.1	17873	34643	1.93829	957	0.352719	1891	1274794464	99.6943
	NW_018735778.1	17837	42233	2.36772	772	0.430865	1892	1274812301	99.6957
	NW_018735836.1	17828	40907	2.29454	802	0.417547	1893	1274830129	99.6971
	NW_018735740.1	17808	84017	4.71794	222	0.858544	1894	1274847937	99.6985
	NW_018735777.1	17768	24341	1.36993	1290	0.249293	1895	1274865705	99.6999
	NW_018735668.1	17689	2375	0.134264	2279	0.0244327	1896	1274883394	99.7013
	NW_018735813.1	17687	25580	1.44626	1243	0.263183	1897	1274901081	99.7027
	NW_018734793.1	17686	130340	7.36967	49	1.34109	1898	1274918767	99.7041
	NW_018735846.1	17638	77669	4.4035	262	0.801326	1899	1274936405	99.7054
	NW_018735890.1	17615	14064	0.79841	1751	0.14529	1900	1274954020	99.7068
	NW_018735272.1	17613	11590	0.658037	1896	0.119746	1901	1274971633	99.7082
	NW_018735675.1	17587	14418	0.81981	1727	0.149185	1902	1274989220	99.7096
	NW_018735826.1	17586	54445	3.09593	528	0.56338	1903	1275006806	99.7109
	NW_018736294.1	17578	67240	3.82524	349	0.696096	1904	1275024384	99.7123
	NW_018735543.1	17544	19384	1.10488	1498	0.20106	1905	1275041928	99.7137
	NW_018734758.1	17500	60226	3.44149	437	0.626263	1906	1275059428	99.7151
	NW_018736613.1	17500	37624	2.14994	867	0.391235	1907	1275076928	99.7164
	NW_018735801.1	17497	25228	1.44185	1249	0.262379	1908	1275094425	99.7178
	NW_018735752.1	17486	19462	1.113	1492	0.202539	1909	1275111911	99.7192
	NW_018735819.1	17456	66397	3.80368	355	0.692173	1910	1275129367	99.7205
	NW_018735509.1	17423	7912	0.454112	2073	0.0826369	1911	1275146790	99.7219
	NW_018735698.1	17307	6370	0.368059	2153	0.0669774	1912	1275164097	99.7233
	NW_018735542.1	17285	19026	1.10072	1507	0.200304	1913	1275181382	99.7246
	NW_018735728.1	17276	53490	3.0962	527	0.56343	1914	1275198658	99.726
	NW_018735642.1	17240	16968	0.984223	1594	0.179103	1915	1275215898	99.7273
	NW_018735654.1	17224	64555	3.74797	369	0.682035	1916	1275233122	99.7286
	NW_018735914.1	17175	27435	1.59738	1155	0.290682	1917	1275250297	99.73
	NW_018735743.1	17116	36102	2.10925	881	0.383831	1918	1275267413	99.7313
	NW_018735502.1	17116	15094	0.881865	1663	0.160477	1919	1275284529	99.7327
	NW_018735612.1	17065	14697	0.861236	1679	0.156723	1920	1275301594	99.734
	NW_018735523.1	17058	25848	1.5153	1200	0.275746	1921	1275318652	99.7353
	NW_018736435.1	17031	111918	6.57143	73	1.19583	1922	1275335683	99.7367
	NW_018735800.1	17031	29501	1.73219	1069	0.315215	1923	1275352714	99.738
	NW_018735765.1	17009	20189	1.18696	1419	0.215996	1924	1275369723	99.7393
	NW_018735624.1	16980	13366	0.787161	1769	0.143243	1925	1275386703	99.7407
	NW_018734939.1	16978	6591	0.388208	2128	0.070644	1926	1275403681	99.742
	NW_018736276.1	16960	82453	4.86162	199	0.88469	1927	1275420641	99.7433
	NW_018735645.1	16925	24436	1.44378	1248	0.262731	1928	1275437566	99.7446
	NW_018735524.1	16849	10397	0.617069	1949	0.112291	1929	1275454415	99.746
	NW_018735761.1	16839	18540	1.10102	1505	0.200357	1930	1275471254	99.7473
	NW_018735685.1	16802	4790	0.285085	2215	0.0518782	1931	1275488056	99.7486
	NW_018736476.1	16785	10656	0.634853	1926	0.115527	1932	1275504841	99.7499
	NW_018735852.1	16730	42585	2.54543	716	0.463203	1933	1275521571	99.7512
	NW_018736221.1	16706	12313	0.737041	1826	0.134123	1934	1275538277	99.7525
	NW_018735510.1	16651	43163	2.59222	694	0.471717	1935	1275554928	99.7538
	NW_018735747.1	16644	18071	1.08574	1519	0.197576	1936	1275571572	99.7551
	NW_018735588.1	16632	10814	0.650192	1904	0.118318	1937	1275588204	99.7564
	NW_018735565.1	16560	17183	1.03762	1557	0.188821	1938	1275604764	99.7577
	NW_018735129.1	16530	47440	2.86993	586	0.522255	1939	1275621294	99.759
	NW_018735763.1	16524	19968	1.20842	1399	0.219902	1940	1275637818	99.7603
	NW_018735412.1	16522	117586	7.11693	56	1.2951	1941	1275654340	99.7616
	NW_018735721.1	16518	24611	1.48995	1212	0.271133	1942	1275670858	99.7629
	NW_018734847.1	16500	11923	0.722606	1835	0.131496	1943	1275687358	99.7642
	NW_018735504.1	16476	13804	0.837825	1706	0.152463	1944	1275703834	99.7655
	NW_018734572.1	16473	27598	1.67535	1114	0.304871	1945	1275720307	99.7667
	NW_018735857.1	16422	10665	0.649434	1907	0.11818	1946	1275736729	99.768
	NW_018735637.1	16395	17857	1.08917	1517	0.198202	1947	1275753124	99.7693
	NW_018735706.1	16322	18798	1.1517	1448	0.20958	1948	1275769446	99.7706
	NW_018735886.1	16294	23962	1.4706	1222	0.267612	1949	1275785740	99.7719
	NW_018735689.1	16167	11212	0.693511	1861	0.126201	1950	1275801907	99.7731
	NW_018735520.1	16139	6151	0.381126	2136	0.0693553	1951	1275818046	99.7744
	NW_018735794.1	16128	25300	1.5687	1171	0.285464	1952	1275834174	99.7757
	NW_018735515.1	16110	158222	9.82135	22	1.78724	1953	1275850284	99.7769
	NW_018735514.1	16105	42055	2.6113	684	0.47519	1954	1275866389	99.7782
	NW_018735774.1	16069	70423	4.38254	265	0.79751	1955	1275882458	99.7794
	NW_018735942.1	16062	26762	1.66617	1123	0.3032	1956	1275898520	99.7807
	NW_018735771.1	16040	49330	3.07544	533	0.559651	1957	1275914560	99.7819
	NW_018736614.1	16024	4471	0.279019	2221	0.0507744	1958	1275930584	99.7832
	NW_018735655.1	16015	75907	4.73974	215	0.862513	1959	1275946599	99.7844
	NW_018735789.1	15994	10041	0.627798	1936	0.114243	1960	1275962593	99.7857
	NW_018735650.1	15923	16656	1.04603	1550	0.190352	1961	1275978516	99.7869
	NW_018736351.1	15917	61117	3.83973	348	0.698733	1962	1275994433	99.7882
	NW_018735600.1	15916	32182	2.02199	928	0.367951	1963	1276010349	99.7894
	NW_018735652.1	15713	10912	0.694457	1858	0.126373	1964	1276026062	99.7907
	NW_018735528.1	15666	33969	2.16833	859	0.39458	1965	1276041728	99.7919
	NW_018735564.1	15629	29260	1.87216	989	0.340686	1966	1276057357	99.7931
	NW_018735808.1	15570	12276	0.788439	1765	0.143476	1967	1276072927	99.7943
	NW_018735568.1	15510	43214	2.7862	619	0.507018	1968	1276088437	99.7955
	NW_018735805.1	15459	38898	2.5162	724	0.457885	1969	1276103896	99.7967
	NW_018735823.1	15380	27226	1.77022	1045	0.322135	1970	1276119276	99.7979
	NW_018735623.1	15303	12650	0.826635	1720	0.150427	1971	1276134579	99.7991
	NW_018735835.1	15280	16683	1.09182	1513	0.198683	1972	1276149859	99.8003
	NW_018735505.1	15263	42547	2.78759	617	0.507271	1973	1276165122	99.8015
	NW_018735880.1	15244	42591	2.79395	612	0.508428	1974	1276180366	99.8027
	NW_018735594.1	15207	49406	3.2489	482	0.591217	1975	1276195573	99.8039
	NW_018734564.1	15194	37648	2.47782	739	0.4509	1976	1276210767	99.8051
	NW_018736623.1	15174	28302	1.86516	992	0.339412	1977	1276225941	99.8063
	NW_018735828.1	15122	24829	1.64191	1140	0.298786	1978	1276241063	99.8075
	NW_018735865.1	15028	77560	5.16103	166	0.939177	1979	1276256091	99.8086
	NW_018735691.1	15000	28980	1.932	958	0.351575	1980	1276271091	99.8098
	NW_018735887.1	14974	15389	1.02771	1564	0.187018	1981	1276286065	99.811
	NW_018735860.1	14951	4011	0.268276	2230	0.0488195	1982	1276301016	99.8122
	NW_018735881.1	14837	5795	0.390578	2127	0.0710752	1983	1276315853	99.8133
	NW_018735547.1	14818	5289	0.356931	2167	0.0649523	1984	1276330671	99.8145
	NW_018735671.1	14802	88051	5.94859	103	1.08249	1985	1276345473	99.8156
	NW_018735877.1	14777	35150	2.3787	769	0.432862	1986	1276360250	99.8168
	NW_018735782.1	14766	24630	1.66802	1122	0.303537	1987	1276375016	99.8179
	NW_018735550.1	14716	21609	1.4684	1225	0.267212	1988	1276389732	99.8191
	NW_018735870.1	14674	101740	6.93335	61	1.26169	1989	1276404406	99.8202
	NW_018735672.1	14641	63834	4.35995	268	0.7934	1990	1276419047	99.8214
	NW_018735551.1	14601	6255	0.428395	2097	0.077957	1991	1276433648	99.8225
	NW_018735797.1	14580	93378	6.40453	81	1.16546	1992	1276448228	99.8237
	NW_018735666.1	14574	49765	3.41464	444	0.621378	1993	1276462802	99.8248
	NW_018735534.1	14559	17335	1.19067	1416	0.216672	1994	1276477361	99.826
	NW_018734440.1	14504	325926	22.4715	9	4.08923	1995	1276491865	99.8271
	NW_018736289.1	14488	128599	8.87624	29	1.61525	1996	1276506353	99.8282
	NW_018735716.1	14463	24299	1.68008	1110	0.305732	1997	1276520816	99.8294
	NW_018735768.1	14462	24129	1.66844	1120	0.303614	1998	1276535278	99.8305
[truncated: 298 more rows]
