# Supplementary material for: Eliminating Mosquitoes with Precision Guided Sterile Males
Source: Research Square preprint supplement (doi:10.21203/rs.3.rs-367110/v1), 2021-04-05
Supplement: Supplementary file 3 [file Table S11 - Mapping Stats for RNA sequencing.xlsx]

## Sheet: Sheet1
		Table S13 - Mapping Stats for RNA sequencing
		ID	uniquely_mapped	mapped_to_multiple_loci	mapped_to_too_many_loci	unmapped_too_many_mismatches	unmapped_too_short	unmapped_other	mapped_total
		22901.1_liverpool_males_1_STAR	66.2	25.54	5.23	0	2.57	0.45	96.97
		22902.2_liverpool_males_2_STAR	67.58	23.37	6.63	0	1.92	0.5	97.58
		22903.3_liverpool_males_3_STAR	64.41	25.74	7.35	0	2.05	0.44	97.5
		22904.4_liverpool_females_1_STAR	67.68	24.57	5.34	0	2.02	0.4	97.59
		22905.5_liverpool_females_2_STAR	68.11	24.22	5.37	0	1.83	0.48	97.7
		22906.6_liverpool_females_3_STAR	68.86	24.11	4.77	0	1.75	0.5	97.74
		22907.7_pgSIT_males_1_STAR	72.01	21.46	3.83	0	2.21	0.5	97.3
		22908.8_pgSIT_males_2_STAR	70.22	23.08	4.15	0	2.05	0.5	97.45
		22909.9_pgSIT_males_3_STAR	74.72	19.53	3.29	0	1.9	0.56	97.54
		22910.10_pgSIT_females_1_STAR	66.44	26.52	4.99	0	1.68	0.37	97.95
		22911.11_pgSIT_females_2_STAR	68.82	24.48	4.66	0	1.68	0.36	97.96
		22912.12_pgSIT_females_3_STAR	66.53	26.22	5.02	0	1.81	0.41	97.77
									97.5875
