# Supplementary material for: Eliminating Mosquitoes with Precision Guided Sterile Males
Source: Research Square preprint supplement (doi:10.21203/rs.3.rs-367110/v1), 2021-04-05
Supplement: Supplementary file 4 [file Table S13 - deseq2_liverpool_males_pgSIT_males.annotations_.xlsx]

## Sheet: Deseq
Table S15 -deseq2_liverpool_males_pgSIT_males.annotations
NCBI_ID	baseMean	log2FoldChange	lfcSE	stat	pvalue	padj	AAEL_ID	gene_description	gene_name	gene_synomym
LOC110676765	4525.5	-4.89942	0.151244	-32.394	3.33e-230	4.92e-226	AAEL019894	Tubulin beta chain [Source:UniProtKB/TrEMBL;Acc:Q0PHP3]
LOC23687682	3262.6	-9.47083	0.389228	-24.3324	8.91e-131	6.58e-127	AAEL017262
LOC5576782	1066.73	-5.21626	0.257651	-20.2454	3.9e-91	1.92e-87	AAEL012762	cytochrome P450 [Source:VB Community Annotation]	CYP325N2
LOC5572959	13995.4	-9.95831	0.520145	-19.1452	1.06e-81	3.91e-78	AAEL010186
LOC5578114	2707.04	-6.76904	0.355243	-19.0547	6.01e-81	1.77e-77	AAEL003443	threonine dehydrogenase [Source:VB Community Annotation]
LOC110679642	628.157	-7.35503	0.389111	-18.9021	1.1e-79	2.7e-76	AAEL020895
LOC110676188	891.723	-8.4476	0.45348	-18.6284	1.89e-77	3.99e-74	AAEL024549
LOC5569664	622.077	-4.63033	0.264041	-17.5364	7.56e-69	1.4e-65	AAEL007808	cytochrome P450 [Source:VB Community Annotation]	CYP4D39
LOC5569989	6475.39	-6.11516	0.357363	-17.1119	1.21e-65	1.99e-62	AAEL008066	trkB protein, putative [Source:VB Community Annotation]
LOC5571859	759.571	-4.17594	0.252942	-16.5095	3.14e-61	4.63e-58	AAEL009338	C-Type Lectin (CTL). [Source:VB Community Annotation]	CTL10
LOC5578131	454.988	-7.07106	0.435118	-16.2509	2.2e-59	2.96e-56	AAEL013515	pupal cuticle protein, putative [Source:VB Community Annotation]
LOC23687757	386.852	-5.6959	0.354016	-16.0894	3.03e-58	3.73e-55	AAEL023894
LOC23687556	497.075	-5.94931	0.370195	-16.0707	4.09e-58	4.65e-55	AAEL017136	cytochrome P450 [Source:VB Community Annotation]	CYP325V1
LOC23687962	1348.26	-6.50172	0.406822	-15.9818	1.71e-57	1.81e-54	AAEL017542
LOC23687728	268.099	-6.35088	0.404025	-15.719	1.12e-55	1.1e-52	AAEL017308
LOC5569654	431.625	-4.45618	0.289015	-15.4185	1.23e-53	1.14e-50	AAEL026602
LOC5572962	3678.05	-9.04521	0.586924	-15.4112	1.38e-53	1.2e-50	AAEL010180
LOC5571346	1138.77	-6.76647	0.439192	-15.4067	1.48e-53	1.21e-50	AAEL009011
LOC5575341	3829.97	-8.34049	0.541925	-15.3905	1.9e-53	1.47e-50	AAEL002606	odorant binding protein OBP35 [Source:VB Community Annotation]	OBP35
LOC110679216	323.697	-6.19247	0.412091	-15.0269	4.89e-51	3.61e-48	AAEL021166
LOC5571618	550.34	-7.73469	0.524638	-14.7429	3.42e-49	2.4e-46	AAEL009204	glucose dehydrogenase [Source:VB Community Annotation]
LOC5566755	5419.75	-3.99685	0.277436	-14.4064	4.72e-47	3.17e-44	AAEL005621	long wavelength sensitive opsin [Source:VB Community Annotation]	GPROP4
LOC5575342	182.3	-5.8591	0.40726	-14.3867	6.28e-47	4.03e-44	AAEL002587	odorant binding protein OBP11 [Source:VB Community Annotation]	OBP11
LOC23687817	3105.11	-5.43706	0.381636	-14.2467	4.7e-46	2.89e-43	AAEL017397
LOC5569663	258.512	-5.30535	0.381043	-13.9232	4.58e-44	2.7e-41	AAEL007807	cytochrome P450 [Source:VB Community Annotation]	CYP4D38
LOC5572539	444.839	-5.46421	0.404029	-13.5243	1.12e-41	6.38e-39	AAEL022139
LOC5578675	461.771	-3.77636	0.280981	-13.4399	3.53e-41	1.93e-38	AAEL003618	sodium/chloride dependent amino acid transporter [Source:VB Community Annotation]
LOC5574053	354.53	-5.91695	0.44758	-13.2199	6.74e-40	3.55e-37	AAEL010893	carbonic anhydrase [Source:VB Community Annotation]
LOC5575766	203.733	-6.72886	0.510048	-13.1926	9.68e-40	4.93e-37	AAEL002725
LOC5571051	137.663	-4.45653	0.341059	-13.0667	5.1e-39	2.51e-36	AAEL025361
LOC5573074	1431.06	-8.89256	0.688184	-12.9218	3.39e-38	1.62e-35	AAEL010269	venom allergen [Source:VB Community Annotation]
LOC5566757	5792.9	-3.54846	0.275901	-12.8614	7.43e-38	3.43e-35	AAEL005625	long wavelength sensitive opsin [Source:VB Community Annotation]	GPROP5
LOC5573277	449.965	-2.77915	0.217104	-12.801	1.62e-37	7.24e-35	AAEL010379	ATP-binding cassette transporter [Source:VB Community Annotation]
LOC5577067	1190	-4.58462	0.360727	-12.7094	5.25e-37	2.28e-34	AAEL003093	elongase, putative [Source:VB Community Annotation]
LOC5568890	1158.42	-3.10863	0.244756	-12.7009	5.84e-37	2.47e-34	AAEL007197	amino acid transporter [Source:VB Community Annotation]
LOC110681392	158.756	-6.85809	0.543286	-12.6233	1.57e-36	6.44e-34	AAEL023015
LOC5578805	484.865	-3.46484	0.274574	-12.619	1.66e-36	6.62e-34	AAEL013846
LOC5569262	291.39	-5.32421	0.42268	-12.5963	2.21e-36	8.6e-34	AAEL007508	oviductin [Source:VB Community Annotation]
LOC5568286	313.54	-8.16176	0.656336	-12.4353	1.68e-35	6.36e-33	AAEL006739	adult cuticle protein, putative [Source:VB Community Annotation]
LOC110678313	176.724	-4.92929	0.397293	-12.4072	2.39e-35	8.82e-33	AAEL024468
LOC5574730	249.581	-4.18168	0.337587	-12.387	3.07e-35	1.11e-32	AAEL011368	sugar transporter [Source:VB Community Annotation]
LOC5575153	178.005	-5.14601	0.41604	-12.369	3.84e-35	1.35e-32	AAEL000329
LOC5573169	1043.77	-7.43751	0.61436	-12.1061	9.8e-34	3.37e-31	AAEL002022	protein serine/threonine kinase, putative [Source:VB Community Annotation]
LOC110675723	813.838	-5.84615	0.483872	-12.082	1.31e-33	4.33e-31	AAEL028233
LOC5564732	109.9	-5.37386	0.444794	-12.0817	1.32e-33	4.33e-31	AAEL004407	allergen, putative [Source:VB Community Annotation]
LOC5571347	230.378	-3.39931	0.281583	-12.0721	1.48e-33	4.76e-31	AAEL009002
LOC110679215	207.011	-5.95183	0.493246	-12.0666	1.58e-33	4.98e-31	AAEL025705
LOC110675102	727.154	-6.62601	0.549528	-12.0576	1.77e-33	5.44e-31	AAEL021701
LOC5578129	239.353	-7.79039	0.649923	-11.9866	4.18e-33	1.26e-30	AAEL013511
LOC110675726	183.716	-6.32117	0.528212	-11.9671	5.28e-33	1.56e-30	AAEL025917
LOC5574278	235.13	-7.95151	0.667376	-11.9146	9.94e-33	2.86e-30	AAEL011035
LOC5570613	250.861	-4.24977	0.356716	-11.9136	1.01e-32	2.86e-30	AAEL008424	sodium/chloride dependent amino acid transporter [Source:VB Community Annotation]
tdTomato	247.552	7.67138	0.647883	11.8407	2.4e-32	6.7e-30
LOC110675265	166.143	-3.17568	0.269726	-11.7737	5.33e-32	1.46e-29	AAEL027864
LOC5576776	697.027	-6.84176	0.582326	-11.749	7.14e-32	1.92e-29	AAEL022568
LOC5573903	189.448	-4.27204	0.363816	-11.7423	7.73e-32	2.04e-29	AAEL002185	cuticle protein, putative [Source:VB Community Annotation]
LOC5573586	274.717	-6.56799	0.565105	-11.6226	3.16e-31	8.2e-29	AAEL002110	cuticle protein, putative [Source:VB Community Annotation]
LOC5564352	89.3347	-4.71906	0.406882	-11.5981	4.21e-31	1.07e-28	AAEL004213	monocarboxylate transporter [Source:VB Community Annotation]
LOC110676364	72.1396	-4.68218	0.406156	-11.528	9.53e-31	2.39e-28	AAEL026670
LOC110677734	274.849	-6.50193	0.564481	-11.5184	1.07e-30	2.62e-28	AAEL023763
LOC110674016	264.067	-3.06961	0.268036	-11.4522	2.29e-30	5.55e-28	AAEL022632
GFP	372.706	8.85511	0.778406	11.3759	5.51e-30	1.31e-27
LOC5569819	702.13	-3.28985	0.295968	-11.1155	1.05e-28	2.45e-26	AAEL001308	CRAL/TRIO domain-containing protein [Source:VB Community Annotation]
LOC5572963	712.634	-9.24589	0.831859	-11.1147	1.06e-28	2.45e-26	AAEL010160
LOC5564404	1136.2	-4.59355	0.414141	-11.0918	1.38e-28	3.13e-26	AAEL004242	juvenile hormone-inducible protein, putative [Source:VB Community Annotation]
LOC5579904	610.24	-2.96442	0.267314	-11.0897	1.41e-28	3.15e-26	AAEL001020	anterior fat body protein [Source:VB Community Annotation]
LOC5563699	68.8254	-4.84705	0.438962	-11.0421	2.39e-28	5.28e-26	AAEL000545
LOC5564567	612.459	-4.147	0.377433	-10.9874	4.4e-28	9.55e-26	AAEL014516	metalloproteinase, putative [Source:VB Community Annotation]
LOC5572566	164.89	-5.30922	0.484809	-10.9512	6.56e-28	1.4e-25	AAEL009888	sodium-coupled cation-chloride cotransporter [Source:VB Community Annotation]	CCC2
LOC5566003	353.316	-2.50536	0.232859	-10.7591	5.37e-27	1.13e-24	AAEL005108	manganese-iron (Mn-Fe) superoxide dismutase [Source:VB Community Annotation]	MNSOD2
LOC5573124	531.406	-6.97235	0.648818	-10.7462	6.17e-27	1.28e-24	AAEL002000	zinc carboxypeptidase [Source:VB Community Annotation]
LOC5578573	156.614	3.54243	0.330107	10.7311	7.27e-27	1.49e-24	AAEL013757	hexamerin 2 beta [Source:VB Community Annotation]
LOC5567302	242.913	-3.81412	0.357797	-10.66	1.57e-26	3.17e-24	AAEL005957	phospholipase b, plb1 [Source:VB Community Annotation]
LOC5575390	808.142	-3.01199	0.282863	-10.6482	1.78e-26	3.55e-24	AAEL019507
LOC5571503	101.819	-3.34548	0.315221	-10.6131	2.59e-26	5.1e-24	AAEL001625
LOC5566113	214.363	-5.97127	0.563321	-10.6001	2.98e-26	5.78e-24	AAEL023662
LOC5569937	112.344	3.0776	0.291982	10.5404	5.63e-26	1.08e-23	AAEL008045	hexamerin 2 beta [Source:VB Community Annotation]
LOC5569335	1180.64	-5.78497	0.549159	-10.5342	6.01e-26	1.14e-23	AAEL007542	glutamate decarboxylase [Source:VB Community Annotation]
LOC110679190	695.081	-2.71742	0.258731	-10.5029	8.38e-26	1.55e-23	AAEL021957
LOC5569662	68.6343	-5.50001	0.523672	-10.5028	8.39e-26	1.55e-23	AAEL007795	cytochrome P450 [Source:VB Community Annotation]	CYP4D37
LOC110675348	272.794	-6.73644	0.642299	-10.488	9.81e-26	1.79e-23	AAEL025866
LOC5565614	467.215	-2.50877	0.240622	-10.4262	1.88e-25	3.39e-23	AAEL004872
LOC110675672	264.029	-1.77116	0.170233	-10.4043	2.37e-25	4.18e-23	AAEL024296
LOC5565204	220.723	-4.13394	0.397339	-10.404	2.38e-25	4.18e-23	AAEL004674	pupal cuticle protein 78E, putative [Source:VB Community Annotation]
LOC5564720	620.015	-3.03861	0.292118	-10.402	2.43e-25	4.22e-23	AAEL004409	yellow protein, putative [Source:VB Community Annotation]
LOC5565685	79.8129	-5.15495	0.498719	-10.3364	4.82e-25	8.28e-23	AAEL004933	lysosomal acid lipase, putative [Source:VB Community Annotation]
LOC5573423	479.1	-4.73183	0.458653	-10.3168	5.92e-25	1e-22	AAEL026706
LOC5575676	163.303	-2.59156	0.251259	-10.3143	6.07e-25	1.02e-22	AAEL011996		AKHR-II
LOC5564711	88.3598	-5.31588	0.518489	-10.2526	1.15e-24	1.91e-22	AAEL014579	trypsin, putative [Source:VB Community Annotation]
LOC5574277	1392.95	-7.46991	0.729045	-10.2462	1.23e-24	2.02e-22	AAEL011042
LOC5570131	157.21	2.23859	0.219045	10.2198	1.62e-24	2.62e-22	AAEL008112
LOC5569550	302.493	-5.02694	0.49499	-10.1556	3.13e-24	5.02e-22	AAEL027927
LOC5577708	1952.57	-4.25084	0.419449	-10.1343	3.89e-24	6.18e-22	AAEL010659	lethal(2)essential for life protein, l2efl [Source:VB Community Annotation]
LOC110676896	131.833	-2.39546	0.237065	-10.1047	5.27e-24	8.28e-22	AAEL021299
LOC5569934	838.291	-2.48303	0.245837	-10.1003	5.51e-24	8.56e-22	AAEL008032
LOC5569266	480.505	-3.61134	0.357618	-10.0983	5.62e-24	8.65e-22	AAEL018141
LOC5573900	290.531	-2.28939	0.22846	-10.021	1.23e-23	1.88e-21	AAEL002192	M12 mutant protein precursor, putative [Source:VB Community Annotation]
LOC5579666	545.821	-2.99577	0.30114	-9.94808	2.57e-23	3.86e-21	AAEL003963	calpain 4, 6, 7, invertebrate [Source:VB Community Annotation]
LOC5575076	455.306	-2.46553	0.247853	-9.94753	2.59e-23	3.86e-21	AAEL011638	Cyclic-nucleotide-gated cation channel [Source:UniProtKB/TrEMBL;Acc:A0A1S4FU57]
LOC5576242	1710.05	-2.4539	0.247384	-9.9194	3.43e-23	5.06e-21	AAEL002835
LOC5574456	254.197	-2.48584	0.250666	-9.91693	3.51e-23	5.14e-21	AAEL011177
LOC5577627	129.945	-2.44198	0.246943	-9.88886	4.65e-23	6.74e-21	AAEL003265
LOC110676563	5515.3	-2.62082	0.265375	-9.87594	5.29e-23	7.59e-21	AAEL025323
LOC5578669	137.859	-2.22357	0.225566	-9.85776	6.34e-23	8.93e-21	AAEL003644	carbonic anhydrase, putative [Source:VB Community Annotation]
LOC5577498	252.748	-3.01639	0.305992	-9.85773	6.35e-23	8.93e-21	AAEL003194	xaa-pro aminopeptidase [Source:VB Community Annotation]
LOC5570361	67.5396	-5.44965	0.553521	-9.84543	7.17e-23	9.99e-21	AAEL026740
LOC5575836	107.232	-6.40336	0.650869	-9.83817	7.71e-23	1.06e-20	AAEL012098	synaptic vesicle protein [Source:VB Community Annotation]
LOC5564397	382.452	-2.28744	0.232633	-9.83283	8.13e-23	1.11e-20	AAEL004231	M12 mutant protein precursor, putative [Source:UniProtKB/TrEMBL;Acc:A0A1S4F764]
LOC5569807	101.99	-6.19969	0.632308	-9.80486	1.07e-22	1.45e-20	AAEL001287
LOC110675727	199.346	-6.23728	0.636213	-9.80375	1.08e-22	1.46e-20	AAEL020856
LOC5565206	252.973	-5.34557	0.547369	-9.76594	1.58e-22	2.09e-20	AAEL004677	(s)-2-hydroxy-acid oxidase [Source:VB Community Annotation]
LOC110679436	2239.14	-7.15252	0.732488	-9.76469	1.6e-22	2.09e-20	AAEL027405
LOC110677813	198.792	2.08352	0.213377	9.76449	1.6e-22	2.09e-20	AAEL024098
LOC5564658	188.535	-7.46594	0.765906	-9.74785	1.88e-22	2.44e-20	AAEL004382
LOC5572216	140.816	-4.7918	0.491755	-9.74429	1.95e-22	2.51e-20	AAEL009631	short-chain dehydrogenase [Source:VB Community Annotation]
LOC5564644	193.138	-8.88568	0.916127	-9.69918	3.04e-22	3.87e-20	AAEL004353
LOC23687967	48.4756	-3.79767	0.392461	-9.67654	3.79e-22	4.79e-20	AAEL017547
LOC5571256	141.42	-2.63196	0.272251	-9.66739	4.15e-22	5.19e-20	AAEL001568	glycine receptor beta precursor, putative [Source:VB Community Annotation]
LOC5574112	1814.71	-2.22741	0.230635	-9.65772	4.56e-22	5.66e-20	AAEL002261	GTP cyclohydrolase i [Source:VB Community Annotation]
LOC5574054	38538.5	-3.25918	0.33838	-9.63172	5.87e-22	7.23e-20	AAEL010884	ADP,ATP carrier protein [Source:VB Community Annotation]
LOC5565205	176.476	-3.60592	0.375585	-9.60082	7.93e-22	9.68e-20	AAEL004671	(s)-2-hydroxy-acid oxidase [Source:VB Community Annotation]
LOC5574703	459.296	-2.64108	0.275316	-9.5929	8.56e-22	1.04e-19	AAEL011350
LOC5575191	73.3413	-6.74028	0.702719	-9.59171	8.66e-22	1.04e-19	AAEL000340	cytochrome P450 [Source:VB Community Annotation]
LOC5565393	130.767	-4.73672	0.494462	-9.57953	9.75e-22	1.16e-19	AAEL004769	pupal cuticle protein, putative [Source:VB Community Annotation]
LOC5574652	438.531	-4.34022	0.453646	-9.56742	1.1e-21	1.3e-19	AAEL011292	protease m1 zinc metalloprotease [Source:VB Community Annotation]
LOC5571085	83.8231	-3.83153	0.400556	-9.56551	1.12e-21	1.31e-19	AAEL008820
LOC110678312	233.003	-9.16008	0.957824	-9.56343	1.14e-21	1.32e-19	AAEL024791
LOC110675351	133.275	-2.41353	0.252819	-9.54647	1.34e-21	1.55e-19	AAEL028103
LOC5571815	165.643	-6.6247	0.694016	-9.54546	1.35e-21	1.55e-19	AAEL001685
LOC5575401	275.631	-5.58501	0.585364	-9.5411	1.41e-21	1.61e-19	AAEL019798
LOC110675720	2283.51	-5.28977	0.555233	-9.52712	1.62e-21	1.82e-19	AAEL022409
LOC5572219	173.77	-8.3267	0.875582	-9.50991	1.91e-21	2.14e-19	AAEL009628	short-chain dehydrogenase [Source:VB Community Annotation]
LOC110676147	143.739	-8.4615	0.892883	-9.4766	2.63e-21	2.92e-19	AAEL020342
LOC5570450	133.079	-3.02649	0.31985	-9.4622	3.02e-21	3.32e-19	AAEL008342	monocarboxylate transporter [Source:VB Community Annotation]
LOC110675647	269.513	-2.51866	0.266278	-9.45875	3.12e-21	3.41e-19	AAEL027476
LOC110677827	96.6109	-4.10847	0.435147	-9.44157	3.67e-21	3.99e-19	AAEL025080
LOC5578971	533.376	-2.77909	0.294467	-9.4377	3.81e-21	4.11e-19	AAEL013951	nucleosome assembly protein [Source:VB Community Annotation]
LOC5572453	141.815	-4.5025	0.477556	-9.4282	4.17e-21	4.46e-19	AAEL001813	sodium/solute symporter [Source:VB Community Annotation]
LOC5579650	1177.11	-2.56532	0.272836	-9.4024	5.33e-21	5.67e-19	AAEL003965	calpain 4, 6, 7, invertebrate [Source:VB Community Annotation]
LOC5564863	831.596	-3.55696	0.378364	-9.40089	5.41e-21	5.71e-19	AAEL026837
LOC5568730	149.695	-2.87044	0.306766	-9.35709	8.2e-21	8.58e-19	AAEL007088	ribitol kinase [Source:VB Community Annotation]
LOC5573748	55.414	-4.35812	0.465853	-9.35514	8.35e-21	8.68e-19	AAEL000298	sodium/chloride dependent amino acid transporter [Source:VB Community Annotation]
LOC5567695	1098.81	-2.81474	0.301092	-9.34845	8.89e-21	9.19e-19	AAEL006271	copper-zinc (Cu-Zn) superoxide dismutase [Source:VB Community Annotation]	CUSOD2
LOC5572788	143.658	-2.60793	0.279232	-9.33968	9.66e-21	9.91e-19	AAEL001911
LOC110676520	1546.65	-4.44704	0.476707	-9.32867	1.07e-20	1.09e-18	AAEL021886
LOC110678998	100.83	-7.1912	0.775932	-9.26783	1.9e-20	1.92e-18	AAEL021439
LOC5563615	2060.25	-3.83556	0.413905	-9.26676	1.92e-20	1.93e-18	AAEL000079
LOC110678619	96.4953	-6.86303	0.74206	-9.24862	2.27e-20	2.27e-18	AAEL022906
LOC5571857	116.456	-2.49131	0.269711	-9.23695	2.54e-20	2.51e-18	AAEL009334
LOC5574605	223.645	-2.93808	0.318239	-9.23233	2.65e-20	2.61e-18	AAEL002433
LOC110674297	493.71	-2.05503	0.223439	-9.19731	3.67e-20	3.59e-18	AAEL027207
LOC5571043	8533.1	-2.56141	0.278707	-9.19033	3.92e-20	3.81e-18	AAEL008779
LOC5577610	216.446	-3.83237	0.417863	-9.17133	4.67e-20	4.51e-18	AAEL003256
LOC5563940	2656.36	-3.52697	0.385198	-9.15625	5.37e-20	5.15e-18	AAEL014238	aromatic amino acid decarboxylase [Source:VB Community Annotation]
LOC5568293	223.302	-3.93932	0.43284	-9.1011	8.94e-20	8.52e-18	AAEL006737
LOC5567970	179.151	-11.2205	1.23341	-9.09713	9.28e-20	8.78e-18	AAEL006429	trypsin [Source:VB Community Annotation]
LOC23687713	14965	-3.57671	0.394951	-9.05606	1.35e-19	1.27e-17	AAEL017293
LOC5565753	347.661	-3.16725	0.350775	-9.02927	1.73e-19	1.62e-17	AAEL014964
LOC5565066	522.544	-1.71952	0.191139	-8.9962	2.34e-19	2.17e-17	AAEL004580	beta-galactosidase [Source:VB Community Annotation]
LOC5568292	12390.8	-2.30636	0.257116	-8.97012	2.96e-19	2.73e-17	AAEL006721	2-oxoglutarate dehydrogenase [Source:VB Community Annotation]
LOC5577972	80.9169	-6.8888	0.768145	-8.9681	3.02e-19	2.77e-17	AAEL013449	metalloproteinase, putative [Source:VB Community Annotation]
LOC110677776	261.305	-5.95771	0.667122	-8.93046	4.24e-19	3.87e-17	AAEL023599
LOC5568472	3612.61	-2.07425	0.232554	-8.91944	4.69e-19	4.25e-17	AAEL006895	phosphofructokinase [Source:VB Community Annotation]
LOC5563586	423.891	3.02342	0.339761	8.89868	5.65e-19	5.09e-17	AAEL000025	phosphoenolpyruvate carboxykinase [Source:VB Community Annotation]
LOC5572804	4007.4	-2.16314	0.243163	-8.89587	5.8e-19	5.19e-17	AAEL001898
LOC5571084	430.866	-2.85573	0.322909	-8.84376	9.26e-19	8.23e-17	AAEL008789	apolipophorin-III, putative [Source:VB Community Annotation]
LOC23687518	29048.3	-5.08242	0.577151	-8.80604	1.3e-18	1.15e-16	AAEL017098
LOC5577686	189.711	-2.90567	0.330125	-8.80174	1.35e-18	1.18e-16	AAEL013322
LOC5567576	7077.79	-2.25398	0.256127	-8.80024	1.37e-18	1.19e-16	AAEL006179	tubulin alpha chain [Source:VB Community Annotation]
LOC5579172	31904.8	-2.98131	0.339133	-8.79098	1.48e-18	1.29e-16	AAEL003888	ubiquitin [Source:VB Community Annotation]
LOC5567309	2011.11	-2.64437	0.301502	-8.77065	1.78e-18	1.53e-16	AAEL005964	actin [Source:VB Community Annotation]
LOC5570784	71.45	-4.45737	0.508228	-8.77041	1.78e-18	1.53e-16	AAEL022646	Larval chymotrypsin-like protein [Source:UniProtKB/TrEMBL;Acc:Q8T639]
LOC5572317	7170.67	-2.17595	0.248207	-8.76665	1.84e-18	1.57e-16	AAEL009704
LOC110678659	164.524	-11.0976	1.26661	-8.76168	1.92e-18	1.63e-16	AAEL023052
LOC110679207	247.696	-2.98699	0.341256	-8.75292	2.08e-18	1.75e-16	AAEL022001
LOC5578272	3844.66	-2.51145	0.287038	-8.74953	2.14e-18	1.8e-16	AAEL003501
LOC110676240	260.954	-3.2182	0.368461	-8.73417	2.45e-18	2.05e-16	AAEL025610
LOC110680585	59.3244	-3.33939	0.383042	-8.71807	2.83e-18	2.35e-16	AAEL024815
LOC110678977	58.5202	-2.85855	0.328101	-8.71243	2.97e-18	2.45e-16	AAEL025994
LOC5565405	2621.98	-1.03387	0.118705	-8.70958	3.05e-18	2.5e-16	AAEL014843	heat shock protein [Source:VB Community Annotation]
LOC110680307	80.7821	-2.4547	0.282234	-8.69737	3.4e-18	2.77e-16	AAEL020907
LOC5574091	548.356	-2.40404	0.276783	-8.68563	3.77e-18	3.06e-16	AAEL002270	testis-specific serine/threonine kinase 22c [Source:VB Community Annotation]
LOC5563930	34025.9	-2.46721	0.284624	-8.66832	4.39e-18	3.54e-16	AAEL014231
LOC5563937	65.841	-3.20756	0.370198	-8.66445	4.54e-18	3.64e-16	AAEL014246	glucosyl/glucuronosyl transferases [Source:VB Community Annotation]
LOC5565600	528.644	-2.80707	0.32479	-8.64274	5.49e-18	4.38e-16	AAEL004863
LOC110679696	1706.91	-2.85429	0.330579	-8.63422	5.91e-18	4.7e-16	AAEL020347
LOC5571755	731.813	-2.08953	0.242411	-8.61978	6.71e-18	5.3e-16	AAEL009278	Mitochondrial pyruvate carrier [Source:UniProtKB/TrEMBL;Acc:Q16WA8]
LOC110675574	103.817	-8.00598	0.928973	-8.6181	6.81e-18	5.35e-16
LOC110675678	172.732	-2.25662	0.261961	-8.61432	7.04e-18	5.5e-16	AAEL027651
LOC5571861	48.891	-2.84189	0.330005	-8.61165	7.2e-18	5.6e-16	AAEL009333
LOC5569406	73.6595	-4.67522	0.544037	-8.59357	8.43e-18	6.52e-16	AAEL007607
LOC110677778	172.277	-6.21332	0.723165	-8.59185	8.56e-18	6.57e-16	AAEL023962
LOC5572949	70.5407	-2.89153	0.336558	-8.59147	8.59e-18	6.57e-16	AAEL010171	peptidoglycan recognition protein (Long) [Source:VB Community Annotation]	PGRPLB
LOC110676642	1171.12	-2.00115	0.23388	-8.5563	1.17e-17	8.87e-16	AAEL020574
LOC110679392	110.616	-2.2906	0.267905	-8.55006	1.23e-17	9.32e-16	AAEL020780
LOC5574465	94.4314	-7.86322	0.920121	-8.54585	1.28e-17	9.61e-16	AAEL011183
LOC5573669	204.414	-2.01357	0.23569	-8.5433	1.3e-17	9.78e-16	AAEL010658	orf protein [Source:VB Community Annotation]
LOC110678099	106.858	-2.62903	0.30781	-8.54106	1.33e-17	9.92e-16	AAEL026824
LOC110679654	11875	-2.37692	0.278649	-8.53016	1.46e-17	1.08e-15	AAEL021163
LOC110675671	704.666	-2.32923	0.273355	-8.52088	1.58e-17	1.17e-15	AAEL020943
LOC5570641	149.258	-2.90545	0.34178	-8.50092	1.88e-17	1.38e-15	AAEL027890
LOC5576907	245.068	-8.54376	1.00688	-8.48536	2.15e-17	1.57e-15	AAEL012858
LOC5571819	140.567	-2.34077	0.276433	-8.46775	2.5e-17	1.82e-15	AAEL001687	adenylate cyclase [Source:VB Community Annotation]
LOC5578442	274.777	-1.73612	0.205271	-8.45772	2.73e-17	1.97e-15	AAEL000512	Dynein heavy chain [Source:UniProtKB/TrEMBL;Acc:A0A1S4EW29]
LOC5574040	4072.35	-2.2623	0.268212	-8.43475	3.32e-17	2.39e-15	AAEL010882
LOC5579417	842.056	1.82731	0.217299	8.40922	4.13e-17	2.96e-15	AAEL015458	transferrin [Source:VB Community Annotation]	Tf1
LOC110678936	1078.49	-2.26796	0.269811	-8.40577	4.25e-17	3.03e-15	AAEL026116
LOC110681429	86.3709	-5.75021	0.684617	-8.39917	4.5e-17	3.19e-15	AAEL025700
LOC5567756	333.99	-2.38494	0.284083	-8.39522	4.65e-17	3.29e-15	AAEL000117
LOC5571502	257.218	-2.90169	0.346541	-8.37329	5.6e-17	3.91e-15	AAEL001601
LOC110681545	123.3	-6.0752	0.725574	-8.37295	5.62e-17	3.91e-15	AAEL022259
LOC5574051	123.3	-6.0752	0.725574	-8.37295	5.62e-17	3.91e-15	AAEL022259
LOC5568474	217.865	2.34822	0.280552	8.36999	5.76e-17	4e-15	AAEL006890
LOC5575785	97.9245	-7.4441	0.892931	-8.33669	7.64e-17	5.26e-15	AAEL024006
LOC5577231	826.19	-2.65406	0.318373	-8.33632	7.66e-17	5.26e-15	AAEL003128
LOC110677078	354.919	-2.32083	0.278499	-8.33335	7.86e-17	5.37e-15	AAEL025385
LOC5567308	653.614	-3.44193	0.413258	-8.32876	8.17e-17	5.56e-15	AAEL005959	phospholipase b, plb1 [Source:VB Community Annotation]
LOC5572311	257.98	-2.07627	0.249948	-8.30681	9.83e-17	6.66e-15	AAEL009697
LOC110679512	323.551	-2.23894	0.269788	-8.29886	1.05e-16	7.09e-15	AAEL025138
LOC5578280	294.172	-2.35081	0.28343	-8.29415	1.09e-16	7.34e-15	AAEL013598
LOC110677663	347	-2.14739	0.259009	-8.29079	1.13e-16	7.52e-15	AAEL023914
LOC5567398	57.6096	-4.99865	0.603162	-8.2874	1.16e-16	7.7e-15	AAEL006044	cytochrome P450 [Source:VB Community Annotation]	CYP325Q1
LOC5566780	41.9174	-5.2366	0.63239	-8.28066	1.22e-16	8.11e-15	AAEL015247
LOC5572370	299.576	-1.2471	0.150826	-8.26846	1.36e-16	8.95e-15	AAEL009745	nitric oxide synthase [Source:VB Community Annotation]
LOC5569806	1459.64	-4.04732	0.489669	-8.26541	1.39e-16	9.14e-15	AAEL001294
LOC5578205	368.683	-2.79361	0.338366	-8.25618	1.5e-16	9.83e-15	AAEL003474
LOC5578091	273.343	-1.80248	0.218466	-8.2506	1.58e-16	1.03e-14	AAEL022878
LOC5563941	817.527	-1.93129	0.234094	-8.25007	1.58e-16	1.03e-14	AAEL014242
LOC5569951	137.928	-2.72462	0.331249	-8.22527	1.95e-16	1.26e-14	AAEL008046	rh antigen [Source:VB Community Annotation]
LOC5570892	843.747	-2.58234	0.314105	-8.22128	2.01e-16	1.29e-14	AAEL027475
LOC5575262	102.355	-5.71791	0.695866	-8.21697	2.09e-16	1.33e-14	AAEL011727	Molybdenum cofactor sulfurase 2 (MoCo sulfurase 2)(MOS 2)(EC 4.4.-.-)(Protein maroon-like 2)(Ma-l 2) [Source:VB Community Annotation]
LOC5565097	892.902	-1.71253	0.208769	-8.20302	2.34e-16	1.49e-14	AAEL004583
LOC5577454	112.6	-2.18202	0.266326	-8.19305	2.55e-16	1.61e-14	AAEL022248
LOC110680390	252.48	-2.75385	0.336298	-8.1887	2.64e-16	1.67e-14	AAEL027762
LOC5567294	1267.8	-2.57251	0.314254	-8.18607	2.7e-16	1.7e-14	AAEL005950	chloride channel protein 2 [Source:VB Community Annotation]
LOC5571310	1036.79	-1.94084	0.237307	-8.17862	2.87e-16	1.8e-14	AAEL008943	chromatin assembly factor 1, p180-subunit, putative [Source:VB Community Annotation]
LOC5571992	251.8	-2.08157	0.254992	-8.16328	3.26e-16	2.03e-14	AAEL026330
LOC5566179	716.376	-1.87077	0.22931	-8.15828	3.4e-16	2.11e-14	AAEL015077	WD and tetratricopeptide repeat protein [Source:VB Community Annotation]
LOC110674783	105.767	-2.40737	0.295269	-8.15315	3.55e-16	2.19e-14	AAEL022083
LOC23687815	430.401	-2.25181	0.276377	-8.14758	3.71e-16	2.28e-14	AAEL017395
LOC5576763	244.673	-2.57406	0.315979	-8.14632	3.75e-16	2.3e-14	AAEL012748
LOC5571073	226.725	-2.32696	0.285767	-8.14287	3.86e-16	2.36e-14	AAEL026276
LOC5568441	4284.3	-1.88417	0.231512	-8.13854	4e-16	2.43e-14	AAEL006872	calponin/transgelin [Source:VB Community Annotation]
LOC110677244	83.6026	-3.23275	0.397232	-8.1382	4.01e-16	2.43e-14	AAEL020317
LOC5565895	259.662	-2.12215	0.26121	-8.12429	4.5e-16	2.71e-14	AAEL019578
LOC5577308	141.569	-2.63056	0.324115	-8.11615	4.81e-16	2.89e-14	AAEL013161	heat shock protein, putative [Source:VB Community Annotation]
LOC5571270	44.8052	-5.75675	0.711032	-8.09633	5.66e-16	3.39e-14	AAEL021788
CFP	194.604	9.80814	1.21298	8.08596	6.17e-16	3.67e-14
LOC5573532	1643.61	-2.08202	0.258328	-8.05959	7.66e-16	4.54e-14	AAEL010558
LOC5572691	158.837	-1.80018	0.223665	-8.04855	8.38e-16	4.95e-14	AAEL009969	axonemal dynein light chain [Source:VB Community Annotation]
LOC5567187	48.8747	-5.09946	0.633691	-8.04723	8.47e-16	4.98e-14	AAEL000882
LOC110674637	104.219	-2.0037	0.249047	-8.04545	8.59e-16	5.04e-14	AAEL023619
LOC110679244	120.551	-9.68462	1.20431	-8.04161	8.87e-16	5.16e-14	AAEL020155
LOC5576660	73.168	-6.77083	0.841996	-8.04141	8.88e-16	5.16e-14	AAEL012694	juvenile hormone-inducible protein, putative [Source:VB Community Annotation]
LOC5579216	1022.11	-2.66763	0.331786	-8.04021	8.97e-16	5.19e-14	AAEL014053	vacuolar proton ATPases [Source:VB Community Annotation]
LOC5569949	1363.62	-1.65405	0.205854	-8.03507	9.35e-16	5.4e-14	AAEL008815
LOC5573699	451.177	-2.11565	0.263563	-8.02709	9.98e-16	5.74e-14	AAEL010682	armc4 [Source:VB Community Annotation]
LOC5564092	732.737	-1.2401	0.154504	-8.02634	1e-15	5.75e-14	AAEL022882
LOC5576419	1270.95	-3.38946	0.422488	-8.02261	1.04e-15	5.9e-14	AAEL012513	calcium-binding protein E63-1 [Source:VB Community Annotation]
LOC5563844	1434.7	-2.00989	0.250689	-8.01747	1.08e-15	6.11e-14	AAEL014174
LOC5572916	234.46	2.89234	0.360761	8.01735	1.08e-15	6.11e-14	AAEL010125	leucine-rich immune protein (Coil-less) [Source:VB Community Annotation]	LRIM17
LOC5578287	113.538	-2.49683	0.31148	-8.01603	1.09e-15	6.16e-14	AAEL013605
LOC110680876	433.778	-1.95978	0.244907	-8.00216	1.22e-15	6.87e-14	AAEL020758
LOC5572579	2044.69	-2.97383	0.372481	-7.98383	1.42e-15	7.94e-14	AAEL009904
LOC5564579	133.488	-1.85719	0.232689	-7.98144	1.45e-15	8.06e-14	AAEL004339	odorant binding protein OBP17 [Source:VB Community Annotation]	OBP17
LOC5567966	133.862	-9.83686	1.23253	-7.98105	1.45e-15	8.06e-14	AAEL006403	trypsin-beta, putative [Source:VB Community Annotation]
LOC5573437	150.105	-3.25669	0.408135	-7.97946	1.47e-15	8.13e-14	AAEL010479	sugar transporter [Source:VB Community Annotation]
LOC5566290	569.093	-2.52765	0.317029	-7.97294	1.55e-15	8.53e-14	AAEL000725
LOC110675877	209.351	-2.32846	0.292056	-7.97267	1.55e-15	8.53e-14	AAEL027607
LOC5566741	191.295	-1.84116	0.231743	-7.94482	1.94e-15	1.06e-13	AAEL005595
LOC110680556	208.053	-1.96023	0.24686	-7.94065	2.01e-15	1.1e-13	AAEL024667
LOC23687987	52.4549	-5.76877	0.726725	-7.93803	2.05e-15	1.12e-13	AAEL017567
LOC110679862	542.816	-2.08221	0.262501	-7.9322	2.15e-15	1.16e-13	AAEL025867
LOC5570704	620.181	-2.67556	0.337726	-7.92227	2.33e-15	1.26e-13	AAEL022657
LOC110676596	126.226	-9.75205	1.23165	-7.91785	2.42e-15	1.3e-13	AAEL020977
LOC5567347	1678.87	-2.22779	0.281396	-7.91691	2.43e-15	1.3e-13	AAEL006017
LOC5566696	3132.6	-4.48434	0.567176	-7.90643	2.65e-15	1.41e-13
LOC110675310	1962.26	-2.32683	0.294435	-7.90268	2.73e-15	1.45e-13	AAEL026138
LOC110678723	158.682	-1.89959	0.240639	-7.89395	2.93e-15	1.55e-13	AAEL003999	hyperpolarization activated cyclic nucleotide-gated potassium channel [Source:VB Community Annotation]
LOC110675463	106.467	-2.34261	0.29704	-7.8865	3.11e-15	1.64e-13	AAEL017998
LOC5580306	108.786	-2.07067	0.262648	-7.88381	3.18e-15	1.67e-13	AAEL028229
LOC5570224	54.2935	3.37101	0.427626	7.88308	3.19e-15	1.67e-13	AAEL023000
LOC110679245	431.86	-2.37264	0.301032	-7.88168	3.23e-15	1.69e-13	AAEL028116
LOC5575400	94.452	-6.83699	0.867507	-7.88119	3.24e-15	1.69e-13	AAEL019797
LOC5565428	3588.36	-2.11763	0.268731	-7.88012	3.27e-15	1.69e-13	AAEL000637
LOC5569213	160.525	-2.08198	0.264343	-7.87604	3.38e-15	1.74e-13	AAEL023657
LOC5574254	100.902	-2.18487	0.277414	-7.87582	3.39e-15	1.74e-13	AAEL023307
LOC5568965	924.109	-2.05038	0.260594	-7.86807	3.6e-15	1.85e-13	AAEL007253
LOC5567374	5865.39	-2.21037	0.281108	-7.86308	3.75e-15	1.92e-13	AAEL006042	arginine or creatine kinase [Source:VB Community Annotation]
LOC110676148	672.186	-4.88764	0.622348	-7.85355	4.04e-15	2.06e-13	AAEL025092
LOC5567896	44.8962	-6.02615	0.767679	-7.84983	4.17e-15	2.11e-13	AAEL006354	epoxide hydrolase [Source:VB Community Annotation]
LOC110679095	97.6825	-2.28111	0.290866	-7.84247	4.42e-15	2.23e-13	AAEL022342
LOC110676807	234.788	-2.39426	0.305307	-7.84216	4.43e-15	2.23e-13	AAEL025326
LOC5576131	539.69	-2.3686	0.302121	-7.8399	4.51e-15	2.27e-13	AAEL002796	l-asparaginase i [Source:VB Community Annotation]
LOC23687789	4102.64	-2.16445	0.276175	-7.83722	4.61e-15	2.31e-13	AAEL023387
LOC110680875	417.418	-2.13398	0.272326	-7.83613	4.65e-15	2.32e-13	AAEL023277
LOC5578300	621.914	-3.89526	0.497421	-7.83091	4.84e-15	2.41e-13	AAEL013612
LOC110675987	38.7522	-5.51817	0.704731	-7.83018	4.87e-15	2.41e-13	AAEL025886
LOC5572260	196.763	-9.51794	1.21888	-7.80876	5.78e-15	2.85e-13	AAEL009695
LOC5567967	66.4834	-9.7887	1.25417	-7.80494	5.95e-15	2.93e-13	AAEL006414	trypsin [Source:VB Community Annotation]
LOC110676568	1380.08	-3.89213	0.498885	-7.80166	6.11e-15	3e-13	AAEL020990
LOC110675429	248.356	-2.09662	0.269061	-7.79233	6.58e-15	3.22e-13	AAEL026523
LOC5577756	1874.79	-2.07433	0.266215	-7.79195	6.6e-15	3.22e-13	AAEL003308	trypsin, putative [Source:VB Community Annotation]
LOC110676597	52.7204	-9.45587	1.21488	-7.78336	7.06e-15	3.43e-13	AAEL024453
LOC5571388	442.853	-1.42943	0.183907	-7.77254	7.69e-15	3.72e-13	AAEL009035
LOC5577020	534.731	-2.23731	0.288023	-7.7678	7.99e-15	3.85e-13	AAEL012937
LOC110679440	57.1882	-2.49089	0.320718	-7.76661	8.06e-15	3.87e-13	AAEL026072
LOC110681187	57.1882	-2.49089	0.320718	-7.76661	8.06e-15	3.87e-13	AAEL020979
LOC5574846	159.588	-1.83133	0.235849	-7.76482	8.18e-15	3.91e-13	AAEL011448
LOC110677060	2629.09	-5.71806	0.738653	-7.7412	9.85e-15	4.69e-13	AAEL026304
LOC5578359	297.197	-2.81537	0.363855	-7.73763	1.01e-14	4.81e-13	AAEL003527
LOC5570982	109.486	-3.21069	0.415216	-7.73258	1.05e-14	4.99e-13	AAEL008701	myoinositol oxygenase [Source:VB Community Annotation]
LOC5571808	1005.61	-1.79183	0.231879	-7.72746	1.1e-14	5.18e-13	AAEL001680
LOC5568294	82.7222	-4.61924	0.598247	-7.72129	1.15e-14	5.42e-13	AAEL006749
LOC5575942	3301.61	-4.41072	0.571339	-7.71996	1.16e-14	5.46e-13	AAEL024914	Putative synaptic vesicle transporter svop [Source:UniProtKB/TrEMBL;Acc:A0A0P6IYS1]
LOC110679081	98.5111	-2.4151	0.312876	-7.71904	1.17e-14	5.48e-13	AAEL023634
LOC110675817	1363.1	-2.13208	0.276716	-7.70493	1.31e-14	6.1e-13	AAEL027221
LOC5575817	427.147	-1.80587	0.234708	-7.6941	1.42e-14	6.6e-13	AAEL012089
LOC5571516	288.566	-3.04573	0.395854	-7.69408	1.43e-14	6.6e-13	AAEL009112
LOC5574271	19254.7	-2.6354	0.342588	-7.69263	1.44e-14	6.65e-13	AAEL022261
LOC5566248	138.091	-2.3803	0.309583	-7.68874	1.49e-14	6.84e-13	AAEL015106
LOC110677222	242.68	-1.74909	0.227541	-7.6869	1.51e-14	6.91e-13	AAEL024381
LOC5566280	149.175	-1.71283	0.223254	-7.6721	1.69e-14	7.74e-13	AAEL000751	Na/Ca exchanger [Source:VB Community Annotation]
LOC5574761	232.959	-2.11259	0.275397	-7.67108	1.71e-14	7.77e-13	AAEL011406	cytochrome c oxidase polypeptide [Source:VB Community Annotation]
LOC110677272	226.967	-2.382	0.310861	-7.66259	1.82e-14	8.26e-13	AAEL023913
LOC110680777	1705.1	-3.86726	0.504696	-7.66256	1.82e-14	8.26e-13	AAEL024387	Putative serine protease [Source:UniProtKB/TrEMBL;Acc:A0A0P6ITL8]
LOC5574193	482.244	-1.76645	0.230722	-7.65619	1.92e-14	8.65e-13	AAEL002309	Thioredoxin Peroxidase. [Source:VB Community Annotation]	TPX4
LOC5569519	531.403	-1.36907	0.178979	-7.64931	2.02e-14	9.1e-13	AAEL007701
LOC5568366	376.007	-2.2047	0.288261	-7.64826	2.04e-14	9.14e-13	AAEL001073	malic enzyme [Source:VB Community Annotation]
LOC5573650	70.3602	-2.20316	0.288138	-7.64621	2.07e-14	9.26e-13	AAEL010639
LOC110679094	85.2458	-2.07739	0.27183	-7.64224	2.13e-14	9.52e-13	AAEL026842
LOC5574351	619.96	-2.39392	0.313461	-7.63705	2.22e-14	9.89e-13	AAEL002361
LOC5570331	482.149	-4.71963	0.618062	-7.63618	2.24e-14	9.92e-13	AAEL001390
LOC5568806	288.573	-1.951	0.255738	-7.62892	2.37e-14	1.05e-12	AAEL001156
LOC5576269	107.442	-3.23579	0.424325	-7.62574	2.43e-14	1.07e-12	AAEL012425	sterol desaturase [Source:VB Community Annotation]
LOC110674840	1274.68	-2.29849	0.301641	-7.61996	2.54e-14	1.11e-12	AAEL021654
LOC5579034	562.526	-1.59246	0.208993	-7.6197	2.54e-14	1.11e-12	AAEL027809
LOC5568971	789.405	-2.63993	0.346923	-7.60957	2.75e-14	1.2e-12	AAEL018137
LOC5566764	234.178	-2.16349	0.284721	-7.59865	2.99e-14	1.3e-12	AAEL005630
LOC5577564	123.555	-7.24086	0.953034	-7.5977	3.01e-14	1.31e-12	AAEL013276	acid phosphatase [Source:VB Community Annotation]
LOC110678743	1097.55	-2.22236	0.292614	-7.59486	3.08e-14	1.33e-12	AAEL023103
LOC5564642	519.869	-2.063	0.271729	-7.59211	3.15e-14	1.36e-12	AAEL004361	alpha-glucosidase [Source:VB Community Annotation]
LOC110676781	552.833	-2.47795	0.32696	-7.57877	3.49e-14	1.5e-12	AAEL022313
LOC5575539	508.628	-2.01905	0.266452	-7.57756	3.52e-14	1.51e-12	AAEL002674
LOC5563918	163.97	-1.88457	0.248875	-7.57234	3.67e-14	1.57e-12	AAEL020652
LOC110677892	188.149	-2.06935	0.273877	-7.55578	4.16e-14	1.78e-12	AAEL027834
LOC5574512	1201.35	-2.24777	0.29761	-7.55273	4.26e-14	1.81e-12	AAEL011193	steroid dehydrogenase [Source:VB Community Annotation]
LOC110677051	944.2	-2.04848	0.27126	-7.5517	4.3e-14	1.82e-12	AAEL023970
LOC110675725	190.1	-5.09172	0.674711	-7.54652	4.47e-14	1.89e-12	AAEL027392
LOC110679879	1568.27	-2.03354	0.269492	-7.54582	4.49e-14	1.9e-12	AAEL021509
LOC5574445	267.32	-4.02495	0.534005	-7.5373	4.8e-14	2.02e-12	AAEL011160
LOC110678800	46.1887	-9.26253	1.23125	-7.52285	5.36e-14	2.25e-12	AAEL020188
LOC5567040	286.716	-5.95992	0.793747	-7.50858	5.98e-14	2.5e-12	AAEL005768
LOC110675256	190.652	-2.02229	0.269333	-7.5085	5.98e-14	2.5e-12	AAEL021867
LOC5579449	260.543	-1.9871	0.264663	-7.50803	6e-14	2.5e-12	AAEL024990
LOC5568509	123.839	-2.14774	0.286105	-7.50682	6.06e-14	2.51e-12	AAEL006924
LOC5572244	263.782	-2.00023	0.266628	-7.50196	6.29e-14	2.6e-12	AAEL026066
LOC5573055	772.987	-1.95247	0.260956	-7.48201	7.32e-14	3.02e-12	AAEL022748
LOC5571215	490.148	-2.29794	0.30743	-7.47465	7.74e-14	3.18e-12	AAEL007191	amino acid transporter [Source:VB Community Annotation]
LOC5567130	182.015	-2.25902	0.302429	-7.4696	8.04e-14	3.3e-12	AAEL005891	calmodulin [Source:VB Community Annotation]
LOC110681444	77.5757	-7.55974	1.01258	-7.46585	8.28e-14	3.39e-12	AAEL025934
LOC110676152	6102.68	-3.31089	0.443774	-7.46076	8.6e-14	3.51e-12	AAEL027052
LOC110679536	247.631	-1.96443	0.263528	-7.45432	9.03e-14	3.68e-12	AAEL025366
LOC5564456	1512.42	-2.2022	0.295499	-7.45249	9.16e-14	3.72e-12	AAEL014391	Map kinase phosphatase [Source:UniProtKB/TrEMBL;Acc:A0A1S4G264]
LOC5574845	113.436	-4.54526	0.610216	-7.4486	9.43e-14	3.82e-12	AAEL011460
LOC5564654	2989.28	-2.02049	0.271483	-7.44243	9.89e-14	3.99e-12	AAEL004366
LOC110675885	1074.39	-2.18189	0.293258	-7.44018	1.01e-13	4.05e-12	AAEL026591
LOC5568466	692.134	-1.77998	0.239323	-7.43754	1.03e-13	4.12e-12	AAEL006881	multiple C2 domain and transmembrane region protein, putative [Source:VB Community Annotation]
LOC5571646	152.564	-2.36111	0.318657	-7.40955	1.27e-13	5.07e-12	AAEL001645	Alkaline ceramidase [Source:UniProtKB/TrEMBL;Acc:Q17KM2]
LOC5567244	644.86	-1.32299	0.178663	-7.40495	1.31e-13	5.24e-12	AAEL018055
LOC5575071	34.0447	-3.37317	0.455975	-7.39771	1.39e-13	5.52e-12	AAEL011624	granzyme A precursor, putative [Source:VB Community Annotation]
LOC5566967	693.011	-3.03011	0.410108	-7.38856	1.48e-13	5.89e-12	AAEL005747
LOC5574451	208.728	1.98368	0.268637	7.38426	1.53e-13	6.07e-12	AAEL011169	hexamerin 2 beta [Source:VB Community Annotation]
LOC110679586	107.42	-1.91471	0.259322	-7.38355	1.54e-13	6.09e-12	AAEL019510
LOC5572878	1138.9	-2.12072	0.28763	-7.37309	1.67e-13	6.57e-12	AAEL020040
LOC5565454	277.611	-4.11333	0.558108	-7.37012	1.7e-13	6.7e-12	AAEL000647
LOC110679323	242.215	-2.28261	0.309868	-7.3664	1.75e-13	6.87e-12	AAEL022858
LOC5570472	3012.24	-2.44391	0.332039	-7.36031	1.83e-13	7.17e-12	AAEL025597	Amino acid transporter [Source:UniProtKB/TrEMBL;Acc:A0A1S4FFR9]
LOC5567708	550.244	-2.16351	0.294022	-7.35831	1.86e-13	7.26e-12	AAEL019849
LOC5575840	732.76	1.09485	0.148834	7.35616	1.89e-13	7.36e-12	AAEL012125	activin receptor type I, putative [Source:VB Community Annotation]
LOC5579398	420.722	-2.37454	0.322966	-7.35228	1.95e-13	7.55e-12	AAEL015481	neuronal calcium sensor, putative [Source:VB Community Annotation]
LOC5579017	191.438	-1.72356	0.234613	-7.34642	2.04e-13	7.87e-12	AAEL022184
LOC5567256	1126.86	-1.96737	0.267922	-7.34307	2.09e-13	8.05e-12	AAEL029012
LOC110677839	907.015	-1.95712	0.266683	-7.33877	2.16e-13	8.29e-12	AAEL026461
LOC5565219	217.378	-1.95234	0.266462	-7.32691	2.36e-13	9.03e-12	AAEL004659
LOC5568646	79.1578	-2.12642	0.290329	-7.32418	2.4e-13	9.2e-12	AAEL028234
LOC5569177	283.762	-2.27272	0.310394	-7.32204	2.44e-13	9.32e-12	AAEL007434	testis-specific serine/threonine kinase 22c [Source:VB Community Annotation]
LOC5564510	379.116	-1.96549	0.268471	-7.32106	2.46e-13	9.36e-12	AAEL004278
LOC110678874	114.359	-2.0742	0.283369	-7.31977	2.48e-13	9.43e-12	AAEL024081
LOC110678884	186.488	-1.91706	0.262017	-7.31657	2.54e-13	9.63e-12	AAEL022181
LOC110681241	158.129	1.4029	0.191774	7.31538	2.57e-13	9.69e-12	AAEL027458
LOC5578916	690.78	-1.9829	0.271123	-7.31363	2.6e-13	9.8e-12	AAEL003757	glutamate dehydrogenase [Source:VB Community Annotation]
LOC5576835	1432.16	-1.87219	0.256745	-7.29202	3.05e-13	1.15e-11	AAEL012819	vacuolar ATP synthase subunit g [Source:VB Community Annotation]
LOC110675257	395.982	-2.85901	0.392435	-7.28531	3.21e-13	1.2e-11	AAEL025410
LOC110680246	282.867	-1.9991	0.27506	-7.26786	3.65e-13	1.37e-11	AAEL025603
LOC5565478	834.841	-2.84154	0.391036	-7.26669	3.68e-13	1.37e-11	AAEL020941
LOC5578102	34.7399	-4.9193	0.677061	-7.26568	3.71e-13	1.38e-11	AAEL003406
LOC5578361	306.863	-2.57785	0.355323	-7.25497	4.02e-13	1.49e-11	AAEL003550	aquaporin [Source:VB Community Annotation]
LOC110678573	150.021	-2.59559	0.357917	-7.25194	4.11e-13	1.52e-11	AAEL025686
LOC5576970	55.6354	-2.76005	0.381058	-7.2431	4.39e-13	1.62e-11	AAEL003091	glucosyl/glucuronosyl transferases [Source:VB Community Annotation]
LOC110677914	164.642	-2.28031	0.315021	-7.23859	4.53e-13	1.67e-11	AAEL019906
LOC5569196	894.943	-1.70044	0.234939	-7.2378	4.56e-13	1.68e-11	AAEL023625
LOC110679477	91.1663	-10.2471	1.41599	-7.23673	4.6e-13	1.68e-11	AAEL023997
LOC5567804	709.829	-1.95917	0.271399	-7.2188	5.24e-13	1.92e-11	AAEL000108	leucine aminopeptidase [Source:VB Community Annotation]
LOC5565779	531.599	-1.9643	0.27242	-7.21058	5.57e-13	2.03e-11	AAEL004995	Caspase-activated nuclease, putative [Source:UniProtKB/TrEMBL;Acc:A0A1S4F990]
LOC110675612	1277.32	1.99933	0.277602	7.20214	5.93e-13	2.16e-11	AAEL022334
LOC5577393	1282.04	-2.01285	0.280014	-7.1884	6.56e-13	2.38e-11	AAEL003177
LOC5570781	250.21	-3.87352	0.538869	-7.18824	6.56e-13	2.38e-11	AAEL008527	Zinc metalloprotease [Source:UniProtKB/TrEMBL;Acc:A0A1S4FK06]
LOC5567422	640.745	-1.67265	0.233038	-7.17758	7.1e-13	2.56e-11	AAEL006073	ubiquitin-conjugating enzyme E2-230k [Source:VB Community Annotation]
LOC5573103	508.655	-1.77674	0.247675	-7.17368	7.3e-13	2.62e-11	AAEL010284	aliphatic nitrilase, putative [Source:VB Community Annotation]
LOC5574378	337.38	-3.10103	0.43228	-7.17366	7.3e-13	2.62e-11	AAEL011109
LOC5568941	1653.6	-1.45387	0.202688	-7.17292	7.34e-13	2.63e-11	AAEL007235	mitochondrial uncoupling protein [Source:VB Community Annotation]
LOC5566703	1294.28	-1.3102	0.182713	-7.1708	7.46e-13	2.67e-11	AAEL005583
LOC5564134	130.358	-3.08257	0.430014	-7.16855	7.58e-13	2.7e-11	AAEL004114	UNC93A protein, putative [Source:VB Community Annotation]
LOC5566251	117.061	-4.33013	0.60508	-7.1563	8.29e-13	2.95e-11	AAEL015110	dipeptidyl-peptidase [Source:VB Community Annotation]
LOC110678786	75.7671	-2.12891	0.297614	-7.15324	8.48e-13	3.01e-11	AAEL023592
LOC5565380	152.74	-1.88085	0.262963	-7.15254	8.52e-13	3.02e-11	AAEL004766	protein phosphatases pp1 regulatory subunit [Source:VB Community Annotation]
LOC110675476	358.496	-1.91863	0.268628	-7.1423	9.18e-13	3.24e-11	AAEL022798
LOC5578296	306.323	-1.57921	0.221121	-7.14183	9.21e-13	3.25e-11	AAEL019622
LOC5568625	9460.57	-1.90131	0.266539	-7.13334	9.8e-13	3.44e-11	AAEL006975	leucine aminopeptidase [Source:VB Community Annotation]
LOC5565887	28.0542	-4.18685	0.587006	-7.13255	9.85e-13	3.46e-11	AAEL000689	steroid dehydrogenase [Source:VB Community Annotation]
LOC110676788	14049.4	-2.11156	0.296081	-7.13169	9.91e-13	3.47e-11	AAEL023987
LOC5568687	58.5286	-2.06351	0.289524	-7.12724	1.02e-12	3.58e-11	AAEL007040	lozenge [Source:VB Community Annotation]
LOC5578950	233.975	-1.81853	0.255237	-7.12487	1.04e-12	3.63e-11	AAEL013918	tetraspanin, putative [Source:VB Community Annotation]
LOC110676217	754.367	-2.2718	0.318897	-7.12393	1.05e-12	3.65e-11	AAEL022073
LOC5572008	1320.24	-1.38393	0.194423	-7.11814	1.09e-12	3.79e-11	AAEL009483
LOC5579143	448.165	-2.20963	0.310606	-7.11393	1.13e-12	3.9e-11	AAEL023618
LOC110676038	1543.5	-2.07498	0.291694	-7.11354	1.13e-12	3.9e-11	AAEL021334
LOC5571616	49.1754	-4.13422	0.581201	-7.11324	1.13e-12	3.9e-11	AAEL009194
LOC5577768	276.817	-1.55721	0.219011	-7.11019	1.16e-12	3.98e-11	AAEL003322	protein phosphatase-7 [Source:VB Community Annotation]
LOC110676026	177.335	-2.06729	0.290802	-7.10892	1.17e-12	4.01e-11	AAEL023651
LOC5564220	452.391	-1.80751	0.254317	-7.10731	1.18e-12	4.05e-11	AAEL025390
LOC5571123	86.2192	-1.96276	0.276494	-7.09877	1.26e-12	4.29e-11	AAEL001537	bax inhibitor [Source:VB Community Annotation]
LOC5573964	1515.26	-0.932175	0.131585	-7.08423	1.4e-12	4.76e-11	AAEL010819	vacuolar ATP synthase subunit H [Source:VB Community Annotation]
LOC5567820	490.097	-1.70682	0.241059	-7.08051	1.44e-12	4.88e-11	AAEL001000	1-acyl-sn-glycerol-3-phosphate acyltransferase [Source:UniProtKB/TrEMBL;Acc:A0A1S4EXH8]
LOC5575939	584.728	-2.06954	0.292663	-7.07143	1.53e-12	5.19e-11	AAEL012184	glutaminyl-peptide cyclotransferase [Source:VB Community Annotation]
LOC110677976	30.8615	-5.21424	0.739013	-7.05569	1.72e-12	5.8e-11	AAEL020275
LOC5576866	408.001	-1.43128	0.202872	-7.05511	1.72e-12	5.82e-11	AAEL019514
LOC5569381	424.616	-3.16425	0.4492	-7.04419	1.87e-12	6.28e-11	AAEL007582	granzyme A precursor, putative [Source:VB Community Annotation]
LOC5566698	892.481	-1.51349	0.215483	-7.02373	2.16e-12	7.25e-11	AAEL005575	transient receptor potential channel 4, [Source:VB Community Annotation]
LOC5571102	78.6285	-2.05209	0.292537	-7.01479	2.3e-12	7.71e-11	AAEL001517	carboxylesterase [Source:VB Community Annotation]
LOC5577612	297.491	-1.75815	0.251086	-7.0022	2.52e-12	8.42e-11	AAEL026088
LOC5567897	143.617	-2.12433	0.303392	-7.00195	2.52e-12	8.42e-11	AAEL006350
LOC5564282	1418.77	-1.3456	0.192287	-6.99786	2.6e-12	8.65e-11	AAEL014378
LOC5572180	102.11	1.85381	0.265467	6.98322	2.88e-12	9.52e-11	AAEL009591	cytochrome P450 [Source:VB Community Annotation]	CYP9M8
LOC5566170	73.1618	-2.55028	0.365203	-6.9832	2.89e-12	9.52e-11	AAEL005222	calmodulin [Source:VB Community Annotation]
LOC110678819	255.699	-2.74484	0.393065	-6.98316	2.89e-12	9.52e-11	AAEL022704
LOC5569119	2852.32	-2.79478	0.400218	-6.98313	2.89e-12	9.52e-11	AAEL007382	serine-threonine kinase receptor-associated protein (strap) [Source:VB Community Annotation]
LOC5576125	385.41	-1.48035	0.212521	-6.96567	3.27e-12	1.08e-10	AAEL002814
LOC5573137	39.8201	-5.85689	0.84187	-6.957	3.48e-12	1.14e-10	AAEL001985	protein serine/threonine kinase, putative [Source:VB Community Annotation]
LOC110678761	453.413	-2.18094	0.313749	-6.95123	3.62e-12	1.19e-10	AAEL022747
LOC110679309	34.1234	-5.60113	0.805911	-6.95006	3.65e-12	1.19e-10	AAEL023129
LOC5566497	184.671	-2.04517	0.294461	-6.94549	3.77e-12	1.23e-10	AAEL005437	transient receptor potential channel [Source:VB Community Annotation]
LOC5573884	639.078	-1.26493	0.182242	-6.94098	3.89e-12	1.27e-10	AAEL010803	ncd [Source:VB Community Annotation]
LOC5573160	33.3822	-3.5956	0.518191	-6.93876	3.96e-12	1.28e-10	AAEL001987	protein serine/threonine kinase, putative [Source:VB Community Annotation]
LOC5565859	45.1624	-2.42833	0.350587	-6.92648	4.31e-12	1.4e-10	AAEL005034	hemoglobin (heterodimeric), putative [Source:VB Community Annotation]
LOC5572055	78.8061	-9.07104	1.31075	-6.9205	4.5e-12	1.45e-10	AAEL001713	fibrinogen and fibronectin [Source:VB Community Annotation]
LOC5568797	815.701	-1.88834	0.273099	-6.91449	4.7e-12	1.51e-10	AAEL019763
LOC5568948	516.281	-1.46508	0.212033	-6.9097	4.86e-12	1.56e-10	AAEL007225	dynein heavy chain [Source:VB Community Annotation]
LOC5572779	74.0429	-2.28139	0.330178	-6.90956	4.86e-12	1.56e-10	AAEL019612
LOC110676744	1641.67	-1.72384	0.249739	-6.90255	5.11e-12	1.64e-10	AAEL028104
LOC5566173	389.212	-1.44345	0.209266	-6.89769	5.29e-12	1.69e-10	AAEL005230
LOC5568149	356.189	-2.24033	0.325095	-6.89129	5.53e-12	1.76e-10	AAEL006587
LOC5573316	813.822	-1.10371	0.16024	-6.88787	5.66e-12	1.8e-10	AAEL010414	set domain protein [Source:VB Community Annotation]
LOC5574733	359.92	-1.60343	0.232855	-6.88597	5.74e-12	1.82e-10	AAEL018216
LOC5568133	81.3371	-5.14844	0.748044	-6.88254	5.88e-12	1.86e-10	AAEL006576	clip-domain serine protease, putative [Source:VB Community Annotation]
LOC5577323	770.317	-1.26678	0.184115	-6.88034	5.97e-12	1.89e-10	AAEL000432	nucleosome assembly protein [Source:VB Community Annotation]
LOC110679454	94.4898	-2.34568	0.341484	-6.86908	6.46e-12	2.04e-10	AAEL024708
LOC5576615	136.751	-2.67015	0.389383	-6.85737	7.01e-12	2.21e-10	AAEL012650
LOC5579421	48.2193	-3.63264	0.530026	-6.8537	7.2e-12	2.26e-10	AAEL024490
LOC5570690	371.606	-2.39513	0.349556	-6.8519	7.29e-12	2.29e-10	AAEL008498	cohesin-subunit, putative [Source:VB Community Annotation]
LOC110677198	223.021	-1.64326	0.239905	-6.84963	7.4e-12	2.32e-10	AAEL023713
LOC5565913	169.107	-1.70234	0.248554	-6.84896	7.44e-12	2.32e-10	AAEL000694
LOC5566373	43.2494	-2.64796	0.386925	-6.84361	7.72e-12	2.41e-10	AAEL005353	Sugar transporter SWEET [Source:UniProtKB/TrEMBL;Acc:Q17A97]
LOC5569151	221.138	-2.13441	0.311897	-6.84332	7.74e-12	2.41e-10	AAEL025281
LOC110679637	125.367	-1.88542	0.275631	-6.84037	7.9e-12	2.45e-10	AAEL021962
LOC110676150	76.9523	-5.60118	0.818923	-6.83968	7.94e-12	2.46e-10	AAEL020963
LOC110674026	210.747	-3.95277	0.578465	-6.8332	8.3e-12	2.57e-10	AAEL027106
LOC5578055	120.64	-2.28268	0.334094	-6.83245	8.35e-12	2.57e-10	AAEL013483	short-chain dehydrogenase [Source:VB Community Annotation]
LOC5567584	23.5833	-4.18714	0.613288	-6.82737	8.65e-12	2.66e-10	AAEL006176	odorant binding protein OBP27 [Source:VB Community Annotation]	OBP27
LOC5567259	1653.58	-1.42403	0.2087	-6.82335	8.89e-12	2.73e-10	AAEL005931	6-phosphogluconate dehydrogenase [Source:VB Community Annotation]
hSpCas9	34.958	8.29793	1.21705	6.81806	9.23e-12	2.83e-10
LOC5564471	109.741	-3.24891	0.476553	-6.81752	9.26e-12	2.83e-10	AAEL014453
LOC5572709	36.3164	-3.60905	0.529759	-6.81262	9.58e-12	2.92e-10	AAEL009978
LOC5573568	848.55	-1.2305	0.180692	-6.80992	9.77e-12	2.97e-10	AAEL002091
LOC110675538	256.296	-2.04991	0.301159	-6.80673	9.98e-12	3.03e-10	AAEL024347
LOC5572686	160.076	-2.08924	0.307438	-6.79566	1.08e-11	3.26e-10	AAEL009963
LOC5573318	106.772	-1.42512	0.209712	-6.79559	1.08e-11	3.26e-10	AAEL010413	Cak1 [Source:UniProtKB/TrEMBL;Acc:A0A1S4FQ70]
LOC5570149	63.3216	-3.20819	0.4723	-6.7927	1.1e-11	3.32e-10	AAEL008132	CRAL/TRIO domain-containing protein [Source:VB Community Annotation]
LOC110678038	32.7594	-6.30612	0.928885	-6.78891	1.13e-11	3.41e-10	AAEL023398
LOC5564580	311.664	-1.57783	0.232467	-6.78735	1.14e-11	3.44e-10	AAEL024425
LOC5574038	46.3788	-2.18364	0.321882	-6.78398	1.17e-11	3.51e-10	AAEL024160
LOC5570385	4807.59	-2.24793	0.33137	-6.78375	1.17e-11	3.51e-10	AAEL008285	pupal cuticle protein, putative [Source:VB Community Annotation]
LOC5573027	104.816	-2.04625	0.301989	-6.77592	1.24e-11	3.7e-10	AAEL010197	axonemal dynein intermediate chain [Source:VB Community Annotation]
LOC110675670	93.6765	-2.58753	0.382004	-6.77358	1.26e-11	3.75e-10	AAEL022937
LOC5570118	439.166	-2.21266	0.326856	-6.7695	1.29e-11	3.85e-10	AAEL008096	mitochondrial ornithine transporter [Source:VB Community Annotation]
LOC5569508	377.085	-1.98436	0.29373	-6.75571	1.42e-11	4.22e-10	AAEL007680
LOC5574871	4217.85	-4.56718	0.67641	-6.75209	1.46e-11	4.32e-10	AAEL011470	cis,cis-muconate transport protein MucK, putative [Source:VB Community Annotation]
LOC5567414	504.257	-1.62527	0.240805	-6.74934	1.49e-11	4.4e-10	AAEL025199
LOC5569397	74.1315	-1.99915	0.296388	-6.74503	1.53e-11	4.52e-10	AAEL007603	odorant binding protein (OBP10) [Source:VB Community Annotation]	OBP10
LOC5565273	133.74	-1.85621	0.275539	-6.73666	1.62e-11	4.78e-10	AAEL004705
LOC5574230	334.241	-1.61891	0.240556	-6.72985	1.7e-11	5e-10	AAEL010998
LOC5565914	30.0006	-4.07779	0.60614	-6.72748	1.73e-11	5.07e-10	AAEL000690	steroid dehydrogenase [Source:VB Community Annotation]
LOC110674214	237.091	-1.90903	0.283993	-6.72209	1.79e-11	5.25e-10	AAEL024306
LOC110681177	217.809	-1.37439	0.204522	-6.71997	1.82e-11	5.32e-10	AAEL023031
LOC5568544	596.669	-1.19846	0.178387	-6.71829	1.84e-11	5.37e-10	AAEL018054
LOC110678423	90.1523	-8.3675	1.24582	-6.71649	1.86e-11	5.42e-10	AAEL020371
LOC5572924	1039.82	-1.89558	0.282236	-6.71632	1.86e-11	5.42e-10	AAEL010149
LOC110679713	82.4913	-2.23655	0.333239	-6.71156	1.93e-11	5.59e-10	AAEL027780
LOC110674877	99.6267	-2.49559	0.372106	-6.70665	1.99e-11	5.77e-10	AAEL021973
LOC23687880	1210.62	-1.61488	0.240814	-6.7059	2e-11	5.79e-10	AAEL017460	Angiotensin-converting enzyme [Source:UniProtKB/TrEMBL;Acc:A0A1S4G6D0]
LOC5576149	53.6487	-3.8768	0.578383	-6.70282	2.04e-11	5.9e-10	AAEL012343	lysosomal acid lipase, putative [Source:VB Community Annotation]
LOC110675502	13369.8	-4.64399	0.693406	-6.69736	2.12e-11	6.11e-10	AAEL023854
LOC5563871	362.193	-2.07135	0.309488	-6.69282	2.19e-11	6.29e-10	AAEL014193
LOC110678019	214.118	-2.07058	0.30956	-6.6888	2.25e-11	6.45e-10	AAEL027701
LOC5564633	87.4116	-8.32273	1.24798	-6.66896	2.58e-11	7.37e-10	AAEL004369	alpha-glucosidase [Source:VB Community Annotation]
LOC5565445	259.165	-2.0623	0.30951	-6.66313	2.68e-11	7.66e-10	AAEL000670	methionine sulfoxide reductase [Source:VB Community Annotation]
LOC5572101	75.2579	-2.42225	0.363799	-6.65823	2.77e-11	7.9e-10	AAEL009514
LOC110676057	25.3568	-3.73187	0.561834	-6.64231	3.09e-11	8.79e-10	AAEL027327
LOC5579271	95.3045	-2.3335	0.351697	-6.63498	3.25e-11	9.22e-10	AAEL015638	trypsin [Source:VB Community Annotation]
LOC5574681	173.894	-1.67616	0.252805	-6.63028	3.35e-11	9.5e-10	AAEL014205
LOC110677987	1000.58	-2.04726	0.308821	-6.62926	3.37e-11	9.54e-10	AAEL024137
LOC5577525	74.5727	-1.83631	0.27701	-6.62905	3.38e-11	9.54e-10	AAEL003183	oxidoreductase [Source:VB Community Annotation]
LOC5568062	187.883	-3.49535	0.52799	-6.62011	3.59e-11	1.01e-09	AAEL006482	sugar transporter [Source:VB Community Annotation]
LOC5564392	3898.18	0.912772	0.137924	6.61794	3.64e-11	1.02e-09	AAEL004234
LOC5573170	3895.17	-3.23177	0.488599	-6.61436	3.73e-11	1.05e-09	AAEL001964	protein serine/threonine kinase, putative [Source:VB Community Annotation]
LOC110679005	445.985	-4.79515	0.725043	-6.61361	3.75e-11	1.05e-09	AAEL028071
LOC5570105	2376.9	-1.35423	0.204782	-6.613	3.77e-11	1.05e-09	AAEL008078	clk2 [Source:VB Community Annotation]
LOC110674678	46.398	-2.52822	0.382321	-6.61281	3.77e-11	1.05e-09	AAEL021672
LOC5576067	119.026	-2.58653	0.391243	-6.61107	3.82e-11	1.06e-09	AAEL024977
LOC5564447	505.917	-1.61765	0.244759	-6.60916	3.87e-11	1.08e-09	AAEL004261
LOC5567039	391.208	-1.70785	0.25902	-6.59353	4.29e-11	1.19e-09	AAEL005777
LOC5566018	192.094	2.08877	0.316833	6.59265	4.32e-11	1.2e-09	AAEL023444
LOC110674446	239.905	-2.03226	0.308785	-6.58148	4.66e-11	1.29e-09	AAEL022973
LOC5564224	164.429	-1.49475	0.227492	-6.57058	5.01e-11	1.38e-09	AAEL004171
LOC5570850	135.767	-2.39667	0.364903	-6.56797	5.1e-11	1.41e-09	AAEL008628	ABC transporter [Source:VB Community Annotation]
LOC5574823	239.73	-1.83817	0.279947	-6.56616	5.16e-11	1.42e-09	AAEL002485	WD repeat-containing protein on Y chromosome (WD40 Y) [Source:VB Community Annotation]	WDY
LOC110678788	34.6809	4.3725	0.666043	6.56489	5.21e-11	1.43e-09	AAEL023707
LOC5576618	57.0513	-1.77405	0.270608	-6.55581	5.53e-11	1.52e-09	AAEL012652
LOC5565425	333.356	-1.32372	0.202176	-6.54734	5.86e-11	1.6e-09	AAEL000669
LOC110680448	36.6862	-2.51611	0.384742	-6.53974	6.16e-11	1.68e-09	AAEL024450
LOC5578458	674.639	-1.13752	0.174039	-6.53601	6.32e-11	1.72e-09	AAEL000523	ring finger protein [Source:VB Community Annotation]
LOC110681070	94.4198	-3.92573	0.601298	-6.52875	6.63e-11	1.8e-09	AAEL023711
LOC5567084	35.0763	-4.27357	0.654699	-6.52754	6.69e-11	1.82e-09	AAEL005821	alanyl aminopeptidase [Source:VB Community Annotation]
LOC110681069	72.6945	-3.7383	0.572912	-6.5251	6.8e-11	1.84e-09	AAEL023636
LOC5573490	39.802	2.61584	0.401207	6.51993	7.03e-11	1.9e-09	AAEL010540	alpha-amylase [Source:VB Community Annotation]
LOC5567844	164.552	-1.54376	0.236929	-6.51571	7.23e-11	1.95e-09	AAEL000980
LOC5569019	59.9111	-1.88372	0.289146	-6.51476	7.28e-11	1.96e-09	AAEL024330
LOC110675326	209.85	-2.24551	0.344695	-6.51448	7.29e-11	1.96e-09	AAEL020165
LOC5575155	173.186	-2.17364	0.334388	-6.50035	8.01e-11	2.15e-09	AAEL000308
LOC5566631	735.187	2.79541	0.43017	6.49839	8.12e-11	2.18e-09	AAEL021888
LOC110681253	94.4929	-2.03058	0.312521	-6.49741	8.17e-11	2.19e-09	AAEL021199
LOC5563688	374.114	-2.23885	0.344601	-6.49694	8.2e-11	2.19e-09	AAEL000542	Amine oxidase [Source:UniProtKB/TrEMBL;Acc:Q17NY9]
LOC5568394	123.461	-1.64591	0.253537	-6.4918	8.48e-11	2.26e-09	AAEL024883
LOC110675909	41.2669	-2.16669	0.334491	-6.47758	9.32e-11	2.48e-09	AAEL020991
LOC5569637	244.463	1.41081	0.218082	6.4692	9.85e-11	2.62e-09	AAEL007778	leucine-rich transmembrane protein [Source:VB Community Annotation]
LOC5578510	140.875	2.66603	0.412163	6.4684	9.9e-11	2.63e-09	AAEL013712	trypsin 5G1 Precursor (EC 3.4.21.4) [Source:VB Community Annotation]
LOC5579181	39.0236	-2.57263	0.397822	-6.46678	1e-10	2.65e-09	AAEL003867
LOC110677906	26.3788	-5.98833	0.926175	-6.46566	1.01e-10	2.66e-09	AAEL021107
LOC5565838	70.6609	-2.75765	0.426999	-6.45822	1.06e-10	2.79e-09	AAEL005044
LOC110675728	44.252	-8.23878	1.27573	-6.45808	1.06e-10	2.79e-09	AAEL027079
LOC5567232	486.381	-1.736	0.268821	-6.45783	1.06e-10	2.79e-09	AAEL029005
LOC110678075	57.1671	-1.79507	0.278089	-6.45499	1.08e-10	2.84e-09	AAEL019815
LOC5578555	107.349	-2.41231	0.374549	-6.44056	1.19e-10	3.12e-09	AAEL003564	threonine dehydratase/deaminase [Source:VB Community Annotation]
LOC5571676	109.604	-1.59892	0.248357	-6.43799	1.21e-10	3.16e-09	AAEL001658	sodium-dependent phosphate transporter [Source:VB Community Annotation]
LOC110678620	46.6611	-8.312	1.29301	-6.42838	1.29e-10	3.37e-09	AAEL020666
LOC5571707	38.2039	-6.51097	1.01329	-6.42557	1.31e-10	3.42e-09	AAEL009239	venom allergen [Source:VB Community Annotation]
LOC110675484	294.622	-2.24981	0.350256	-6.42334	1.33e-10	3.47e-09	AAEL021568
LOC110681296	45.4747	-2.19897	0.342786	-6.415	1.41e-10	3.66e-09	AAEL025938
LOC110678873	100.509	-2.01613	0.31438	-6.41304	1.43e-10	3.7e-09	AAEL021064
LOC110674107	40.9115	-2.81573	0.439305	-6.4095	1.46e-10	3.78e-09	AAEL022476
LOC5580328	97.0051	-2.76731	0.431874	-6.40768	1.48e-10	3.81e-09	AAEL013073
LOC5577315	139.823	-2.56011	0.400024	-6.39989	1.55e-10	4.01e-09	AAEL013169
LOC5576483	261.405	1.45783	0.227801	6.3996	1.56e-10	4.01e-09	AAEL002898
LOC5579300	114.335	-1.31275	0.20516	-6.39867	1.57e-10	4.03e-09	AAEL003378	GPCR Orphan/Putative Class A Family [Source:UniProtKB/TrEMBL;Acc:A0A1S4F4M7]	GPRNNA1
LOC23687928	448.918	-1.31534	0.205606	-6.39735	1.58e-10	4.05e-09	AAEL017508
LOC5569037	34.4396	-4.36111	0.682169	-6.393	1.63e-10	4.16e-09	AAEL007339
LOC110675666	309.492	-2.25543	0.353099	-6.38754	1.69e-10	4.31e-09	AAEL023507
LOC5574546	214.206	-1.55688	0.243897	-6.38336	1.73e-10	4.42e-09	AAEL004073	polypeptide of 976 aa, putative [Source:VB Community Annotation]
LOC5565695	118.54	-2.55516	0.400823	-6.37478	1.83e-10	4.67e-09	AAEL004919
LOC5571227	458.056	-1.43939	0.225849	-6.37325	1.85e-10	4.7e-09	AAEL008928	inward-rectifying potassium channel [Source:VB Community Annotation]	Kir2A	Irk2
LOC5576997	23.5728	-5.10546	0.802473	-6.36216	1.99e-10	5.05e-09	AAEL020717
LOC5578570	712.359	-1.07428	0.168887	-6.36094	2.01e-10	5.08e-09	AAEL013750
LOC5566540	90.2343	-1.49962	0.236057	-6.35278	2.11e-10	5.35e-09	AAEL005465
LOC110675757	204.941	-2.15287	0.339115	-6.34851	2.17e-10	5.49e-09	AAEL025770
LOC5572530	224.49	-2.92904	0.461548	-6.34613	2.21e-10	5.56e-09	AAEL020112
LOC110679007	640.01	-4.20837	0.663929	-6.33859	2.32e-10	5.83e-09	AAEL025144
LOC5575561	274.502	-2.03332	0.320979	-6.33474	2.38e-10	5.97e-09	AAEL002657
LOC5567349	313.728	-1.03877	0.164019	-6.33324	2.4e-10	6.02e-09	AAEL006032
LOC110677641	71.4324	-1.98616	0.313779	-6.32983	2.45e-10	6.14e-09	AAEL027922
LOC5575910	1036.08	-1.82532	0.288713	-6.32228	2.58e-10	6.44e-09	AAEL012154	2,3-cyclic-nucleotide 2-phosphodiesterase [Source:VB Community Annotation]
LOC5579529	20.64	-4.87318	0.771068	-6.32005	2.61e-10	6.52e-09	AAEL013856
LOC5571276	533.121	0.913078	0.144619	6.31366	2.73e-10	6.79e-09	AAEL001561
LOC5576130	26.6755	-2.70774	0.428912	-6.31304	2.74e-10	6.8e-09	AAEL002773
LOC5568889	132.845	-3.48229	0.553622	-6.29002	3.17e-10	7.88e-09	AAEL007194	pupal cuticle protein, putative [Source:VB Community Annotation]
LOC110679324	240.056	-2.15904	0.343938	-6.27741	3.44e-10	8.53e-09	AAEL022491
LOC5567119	216.663	-1.99033	0.31717	-6.27527	3.49e-10	8.63e-09	AAEL022263
LOC110674144	138.504	-2.24197	0.357635	-6.26888	3.64e-10	8.98e-09	AAEL024473
LOC5572224	1819.5	-1.83515	0.292797	-6.26763	3.67e-10	9.04e-09	AAEL009658	alpha,alpha-trehalase [Source:VB Community Annotation]
LOC110676085	53.1863	-1.97086	0.314642	-6.26384	3.76e-10	9.25e-09	AAEL021765
LOC5578909	284.905	0.993631	0.158779	6.25794	3.9e-10	9.59e-09	AAEL026746
LOC5568877	206.306	-1.71442	0.27402	-6.25654	3.94e-10	9.66e-09	AAEL007188
LOC110675101	168.452	-4.22249	0.675345	-6.25234	4.04e-10	9.9e-09	AAEL025320
LOC5574489	180.294	-1.83854	0.294237	-6.2485	4.14e-10	1.01e-08	AAEL018283
LOC5566949	94.0318	-4.07527	0.65359	-6.23521	4.51e-10	1.1e-08	AAEL005714	prolyl 4-hydroxylase alpha subunit 1, [Source:VB Community Annotation]
LOC5578290	271.546	-1.05762	0.16977	-6.22972	4.67e-10	1.14e-08	AAEL023159
LOC5567198	56.9245	-2.40418	0.385967	-6.22899	4.69e-10	1.14e-08	AAEL019837
LOC5567330	848.117	-1.87065	0.300569	-6.2237	4.86e-10	1.18e-08	AAEL006753
LOC5569234	507.325	-1.2926	0.207869	-6.21834	5.02e-10	1.22e-08	AAEL024337
LOC5571952	290.441	2.00356	0.322728	6.20818	5.36e-10	1.3e-08	AAEL009438	regulator of telomere elongation helicase 1 rtel1 [Source:VB Community Annotation]
LOC5580250	1294.57	-1.84602	0.297356	-6.20811	5.36e-10	1.3e-08	AAEL012543	myosin motor, putative [Source:VB Community Annotation]
LOC110679428	201.383	-1.44163	0.232246	-6.20735	5.39e-10	1.3e-08	AAEL027470
LOC5570512	367.319	-1.02902	0.165824	-6.20545	5.45e-10	1.31e-08	AAEL001424	mitochondrial inner membrane protease subunit [Source:VB Community Annotation]
LOC5568751	24.5107	-4.09906	0.660688	-6.20423	5.5e-10	1.32e-08	AAEL007102	trypsin, putative [Source:VB Community Annotation]
LOC110674344	191.111	-2.07747	0.334909	-6.20309	5.54e-10	1.33e-08	AAEL025958
LOC5570381	60.7667	-2.64539	0.427016	-6.19505	5.83e-10	1.4e-08	AAEL018153
LOC5579842	22.4877	-3.96835	0.64159	-6.18518	6.2e-10	1.48e-08	AAEL005855	amino acid transporter [Source:VB Community Annotation]
LOC5570893	5849.63	-1.8605	0.300868	-6.18378	6.26e-10	1.5e-08	AAEL019550
LOC5568470	69.3957	-2.28704	0.370678	-6.16989	6.83e-10	1.63e-08	AAEL006892
LOC5577362	1543.82	-0.708818	0.114927	-6.16754	6.94e-10	1.65e-08	AAEL000448
LOC5574678	230.922	-1.82078	0.295861	-6.15417	7.55e-10	1.79e-08	AAEL022963
LOC110681132	20.6515	-4.6102	0.749359	-6.15219	7.64e-10	1.81e-08	AAEL021761
LOC5576312	1247.62	-1.55844	0.253315	-6.15216	7.64e-10	1.81e-08	AAEL028013
LOC110676883	17.1206	-7.82681	1.27358	-6.14551	7.97e-10	1.89e-08	AAEL023665
LOC5568251	47.9637	-3.51717	0.573117	-6.13691	8.41e-10	1.99e-08	AAEL006674	Clip-Domain Serine Protease family B. [Source:VB Community Annotation]	CLIPB29
LOC5574657	147.775	-1.34087	0.218724	-6.13045	8.76e-10	2.07e-08	AAEL021072
LOC110676122	109.855	-1.53459	0.250354	-6.12971	8.8e-10	2.07e-08	AAEL023908
LOC110675640	179.852	-1.54732	0.252511	-6.12773	8.91e-10	2.1e-08	AAEL020742
LOC5570388	15798.4	-2.18329	0.356423	-6.12555	9.04e-10	2.12e-08	AAEL008289	pupal cuticle protein 78E, putative [Source:VB Community Annotation]
LOC110675339	84.1025	-1.75589	0.286736	-6.1237	9.14e-10	2.14e-08	AAEL023482
LOC5572580	264.199	1.45364	0.237493	6.12075	9.31e-10	2.18e-08	AAEL009899
LOC5575738	345.901	-2.33824	0.382134	-6.1189	9.42e-10	2.2e-08	AAEL012052
LOC5567968	16.5984	-7.78671	1.27316	-6.11607	9.59e-10	2.24e-08	AAEL006430	trypsin [Source:VB Community Annotation]
LOC5564646	66.946	-2.85505	0.466826	-6.11588	9.6e-10	2.24e-08	AAEL026727
LOC110675561	241.086	-1.60551	0.262919	-6.10647	1.02e-09	2.37e-08	AAEL020423
LOC110679011	227.383	-1.23822	0.203088	-6.09696	1.08e-09	2.51e-08	AAEL023018
LOC5573264	900.023	-1.69485	0.278024	-6.09606	1.09e-09	2.52e-08	AAEL010365	lamin, putative [Source:VB Community Annotation]
LOC5571600	19.8463	-4.54407	0.745858	-6.09241	1.11e-09	2.57e-08	AAEL009181	Uncharacterized protein AEGI23 [Source:UniProtKB/TrEMBL;Acc:Q8STC4]
LOC5566834	241.94	-0.935509	0.153562	-6.09206	1.11e-09	2.58e-08	AAEL005674
LOC110681562	464.811	-2.61138	0.42889	-6.0887	1.14e-09	2.63e-08	AAEL020571
LOC5563952	76.4711	1.9965	0.328404	6.07941	1.21e-09	2.78e-08	AAEL004022
LOC5565362	88.384	-1.99847	0.328777	-6.07849	1.21e-09	2.79e-08	AAEL004780	pupal cuticle protein, putative [Source:VB Community Annotation]
LOC5577984	2653.14	-3.36188	0.553168	-6.0775	1.22e-09	2.8e-08	AAEL013458	glutamine synthetase 1, 2 (glutamate-amonia ligase) (gs) [Source:VB Community Annotation]
LOC5569125	53.8396	-2.40862	0.39666	-6.07225	1.26e-09	2.89e-08	AAEL007389	long wavelength sensitive opsin [Source:VB Community Annotation]	GPROP7
LOC5567609	61.975	-1.64261	0.270513	-6.07221	1.26e-09	2.89e-08	AAEL019752
LOC5568897	806.646	-1.70581	0.281229	-6.06555	1.32e-09	3.01e-08	AAEL026878
LOC5575379	194.754	-1.39834	0.230609	-6.06369	1.33e-09	3.04e-08	AAEL011774	sarcolemmal associated protein, putative [Source:VB Community Annotation]
LOC5566117	74.4539	2.47037	0.40798	6.05513	1.4e-09	3.2e-08	AAEL021180
LOC5574550	117.891	-1.27425	0.210468	-6.05435	1.41e-09	3.21e-08	AAEL019838
LOC110674239	522.868	-1.52422	0.251831	-6.05255	1.43e-09	3.24e-08	AAEL027705
LOC5568623	48.31	3.32362	0.549341	6.05019	1.45e-09	3.28e-08	AAEL006971
LOC5572342	242.167	-2.09382	0.346098	-6.04981	1.45e-09	3.28e-08	AAEL009735	iodotyrosine dehalogenase [Source:VB Community Annotation]
LOC5575199	139.004	-1.58818	0.262718	-6.04518	1.49e-09	3.38e-08	AAEL000360	DNAJ homolog subfamily B member, putative [Source:VB Community Annotation]
LOC110679213	126.534	-1.78129	0.294803	-6.04232	1.52e-09	3.43e-08	AAEL024509
LOC5565890	445.583	-1.53477	0.254018	-6.04197	1.52e-09	3.43e-08	AAEL000714	sodium-dependent excitatory amino acid transporter [Source:VB Community Annotation]
LOC5567312	359.183	-1.44608	0.23942	-6.03992	1.54e-09	3.47e-08	AAEL005967
LOC5570219	1567.03	1.42144	0.235749	6.02947	1.64e-09	3.7e-08	AAEL024456
LOC110677785	38.1175	2.88456	0.478631	6.02669	1.67e-09	3.76e-08	AAEL008173
LOC5578506	36.4423	4.51512	0.749852	6.02135	1.73e-09	3.88e-08	AAEL023729
LOC110678856	290.129	-4.9665	0.825502	-6.01634	1.78e-09	3.99e-08	AAEL027968
LOC110676763	185.081	-2.08852	0.347353	-6.01266	1.83e-09	4.08e-08	AAEL022642
LOC110674442	241.937	-2.04946	0.341254	-6.00568	1.91e-09	4.25e-08	AAEL027517
LOC110675850	88.8616	-2.03504	0.339014	-6.00282	1.94e-09	4.32e-08	AAEL025739
LOC5574425	912.433	-0.991186	0.165216	-5.99935	1.98e-09	4.41e-08	AAEL019668
LOC5567431	46.8523	-3.38923	0.565045	-5.99817	2e-09	4.43e-08	AAEL006103	odorant binding protein OBP25 [Source:VB Community Annotation]	OBP25
LOC5578673	302.893	-3.72052	0.620622	-5.99483	2.04e-09	4.52e-08	AAEL003624	sodium/chloride dependent amino acid transporter [Source:VB Community Annotation]
LOC5577718	942.718	-1.84445	0.308096	-5.98661	2.14e-09	4.74e-08	AAEL019528
LOC5574102	17.301	-4.12467	0.69002	-5.9776	2.26e-09	5.01e-08	AAEL002255
LOC5574706	371.134	-1.44152	0.241695	-5.9642	2.46e-09	5.43e-08	AAEL011347
LOC110676664	127.597	-1.60347	0.268902	-5.96301	2.48e-09	5.46e-08	AAEL025474
LOC5567969	17.125	-7.8271	1.31324	-5.96012	2.52e-09	5.54e-08	AAEL006421	trypsin, putative [Source:VB Community Annotation]
LOC110678708	14.1393	-7.56454	1.26922	-5.95998	2.52e-09	5.54e-08	AAEL024801
LOC5565801	373.835	-1.13948	0.1913	-5.9565	2.58e-09	5.66e-08	AAEL005001	aquaporin [Source:VB Community Annotation]
LOC110681487	99.1148	-1.66072	0.27887	-5.95518	2.6e-09	5.69e-08	AAEL013545
LOC5567446	429.353	-1.75793	0.295446	-5.95009	2.68e-09	5.86e-08	AAEL006102	gelsolin precursor [Source:VB Community Annotation]
LOC110675724	33.2933	-6.94987	1.16806	-5.94993	2.68e-09	5.86e-08	AAEL024834
LOC5566951	316.667	-1.52073	0.255693	-5.94749	2.72e-09	5.94e-08	AAEL019459
LOC5573145	21.1488	-4.64474	0.78156	-5.94291	2.8e-09	6.1e-08	AAEL002040	protein serine/threonine kinase, putative [Source:VB Community Annotation]
LOC5575867	40.8717	-1.87457	0.315487	-5.94185	2.82e-09	6.12e-08	AAEL021432	Carboxylic ester hydrolase [Source:UniProtKB/TrEMBL;Acc:Q9TX11]
LOC5570967	125.474	-1.68672	0.283871	-5.94184	2.82e-09	6.12e-08	AAEL008715	AAA ATPase [Source:VB Community Annotation]
LOC5563916	199.255	-2.13901	0.360018	-5.9414	2.83e-09	6.13e-08	AAEL004001
LOC110678467	112.277	-2.40042	0.404587	-5.93301	2.97e-09	6.44e-08	AAEL026860
LOC5570134	555.709	0.880267	0.148393	5.93201	2.99e-09	6.47e-08	AAEL008099	Procollagen-lysine,2-oxoglutarate 5-dioxygenase [Source:UniProtKB/TrEMBL;Acc:A0A1S4FIM3]
LOC110677938	65.5913	-1.97962	0.33377	-5.9311	3.01e-09	6.5e-08	AAEL020028
LOC5574006	215.906	-1.98534	0.334992	-5.92652	3.09e-09	6.67e-08	AAEL010853	AMP dependent ligase [Source:VB Community Annotation]
LOC110680784	409.65	-1.23673	0.208698	-5.9259	3.11e-09	6.69e-08	AAEL022092
LOC5565216	32.4707	-7.78614	1.31566	-5.91805	3.26e-09	7e-08	AAEL027628
LOC5565290	51.9701	-1.95531	0.330577	-5.91485	3.32e-09	7.13e-08	AAEL014804
LOC5565363	338.892	-2.68585	0.455489	-5.89663	3.71e-09	7.95e-08	AAEL004762	pupal cuticle protein, putative [Source:VB Community Annotation]
LOC110678767	191.896	-2.08671	0.354023	-5.89428	3.76e-09	8.05e-08	AAEL024376
LOC110674675	60.2546	-1.75589	0.298148	-5.88933	3.88e-09	8.29e-08	AAEL024118
LOC5579278	60.6471	-2.63846	0.448208	-5.88669	3.94e-09	8.41e-08	AAEL015631	asparagine synthetase [Source:VB Community Annotation]
LOC5567169	157.342	-1.99922	0.339926	-5.88133	4.07e-09	8.67e-08	AAEL005907
LOC5576654	272.066	-1.89389	0.322044	-5.88083	4.08e-09	8.69e-08	AAEL012685
LOC5570663	1332.07	-1.48227	0.252135	-5.8789	4.13e-09	8.78e-08	AAEL008489	calcyphosine/tpp [Source:VB Community Annotation]
LOC5566714	368.661	0.865762	0.147506	5.86934	4.38e-09	9.28e-08	AAEL019661
LOC5577893	4766.78	1.11496	0.190026	5.86739	4.43e-09	9.37e-08	AAEL013407	Catalase [Source:UniProtKB/TrEMBL;Acc:Q16J86]	Cat	CAT1B
LOC5564979	145.375	-2.72094	0.463748	-5.86727	4.43e-09	9.37e-08	AAEL004513	neurotransmitter gated ion channel [Source:VB Community Annotation]
LOC5572416	97.5059	-2.5655	0.437827	-5.85964	4.64e-09	9.8e-08	AAEL009791	cuticle protein, putative [Source:VB Community Annotation]
LOC110674789	973.21	-3.50684	0.59857	-5.8587	4.67e-09	9.83e-08	AAEL021022
LOC110680424	24.333	-2.90466	0.495792	-5.85862	4.67e-09	9.83e-08	AAEL026213
LOC5565681	621.795	-2.16886	0.370335	-5.85647	4.73e-09	9.95e-08	AAEL004939	Tubulin beta chain [Source:UniProtKB/TrEMBL;Acc:Q17BK5]
LOC110676645	24.4666	-7.37532	1.26012	-5.85288	4.83e-09	1.01e-07	AAEL024004
LOC5575841	1711.2	-2.20399	0.377068	-5.84507	5.06e-09	1.06e-07	AAEL012114	troponin C [Source:VB Community Annotation]
LOC5571700	207.935	-1.22304	0.20928	-5.84403	5.1e-09	1.07e-07	AAEL009227	kinesin heavy chain [Source:VB Community Annotation]
LOC5570003	255.201	-1.06263	0.181851	-5.84345	5.11e-09	1.07e-07	AAEL019905
LOC5568698	17.7582	-7.88305	1.34939	-5.84192	5.16e-09	1.08e-07	AAEL007064	Gram-Negative Binding Protein (GNBP) or Beta-1 3-Glucan Binding Protein (BGBP). [Source:VB Community Annotation]	GNBPB6
LOC5577143	12993.4	-1.65309	0.283517	-5.83066	5.52e-09	1.15e-07	AAEL003116	phosrestin i (arrestin b) (arrestin 2) [Source:VB Community Annotation]
LOC5579517	302.689	-0.890795	0.152815	-5.82923	5.57e-09	1.16e-07	AAEL014993
LOC5569000	410.293	1.14776	0.197041	5.82497	5.71e-09	1.19e-07	AAEL007283	acetyl-coa synthetase [Source:VB Community Annotation]
LOC110675294	236.916	-1.3232	0.227288	-5.82171	5.82e-09	1.21e-07	AAEL011492
LOC5565288	53.8018	-8.51943	1.4634	-5.82165	5.83e-09	1.21e-07	AAEL024823
LOC5570939	152.58	-1.33245	0.229293	-5.81112	6.21e-09	1.29e-07	AAEL008664
LOC5570787	184.157	-2.01959	0.34774	-5.80777	6.33e-09	1.31e-07	AAEL008559	glutaminase [Source:VB Community Annotation]
LOC110674048	15.9488	-7.72402	1.33011	-5.80706	6.36e-09	1.31e-07	AAEL023189
LOC5568081	1685.32	-1.13314	0.195195	-5.80517	6.43e-09	1.33e-07	AAEL006516	vacuolar ATP synthase subunit h [Source:VB Community Annotation]
LOC5576971	52.0333	-1.58543	0.273362	-5.79975	6.64e-09	1.37e-07	AAEL003058	glucosyl/glucuronosyl transferases [Source:VB Community Annotation]
LOC5574513	81.4596	-1.52735	0.263353	-5.79964	6.65e-09	1.37e-07	AAEL011186
LOC5567473	592.672	-3.32678	0.574211	-5.79366	6.89e-09	1.41e-07	AAEL000931	Alkaline phosphatase [Source:UniProtKB/TrEMBL;Acc:Q1HQK7]
LOC5566119	2434.45	-1.24737	0.215417	-5.79048	7.02e-09	1.44e-07	AAEL022497
LOC5574790	1976.62	0.776651	0.134305	5.78276	7.35e-09	1.51e-07	AAEL002463
LOC110674612	631.306	2.50128	0.43259	5.7821	7.38e-09	1.51e-07	AAEL023091
LOC5568042	14.0569	-7.5424	1.30444	-5.78209	7.38e-09	1.51e-07	AAEL006481
LOC5568305	580.761	-1.1966	0.206964	-5.78171	7.39e-09	1.51e-07	AAEL006723
LOC5579049	33.5498	2.54248	0.439817	5.78075	7.44e-09	1.51e-07	AAEL013981	hexamerin 2 beta [Source:VB Community Annotation]
LOC5574606	98.2406	-1.39938	0.242095	-5.78028	7.46e-09	1.52e-07	AAEL002430	n-acetylglucosamine-6-phosphate deacetylase [Source:VB Community Annotation]
LOC110674066	1319.3	-4.42225	0.765282	-5.77859	7.53e-09	1.53e-07	AAEL024630
LOC5576272	441.613	-2.31939	0.401609	-5.77524	7.68e-09	1.56e-07	AAEL012424	tubulin alpha chain [Source:VB Community Annotation]
LOC110678083	47.2213	-1.93046	0.334653	-5.76855	8e-09	1.62e-07	AAEL023127
LOC5570211	110.487	1.66035	0.288103	5.76304	8.26e-09	1.67e-07	AAEL019828
LOC5571312	1605.2	-0.959357	0.166574	-5.75934	8.44e-09	1.71e-07	AAEL019533
LOC5571677	1701.89	-2.26331	0.39317	-5.75657	8.58e-09	1.73e-07	AAEL001656	sodium-dependent phosphate transporter [Source:VB Community Annotation]
LOC5575040	1451.03	-1.45992	0.253769	-5.75294	8.77e-09	1.77e-07	AAEL011591
LOC5577195	127.292	-1.49074	0.259154	-5.75232	8.8e-09	1.77e-07	AAEL013415	alpha-tropomyosin 5a, putative [Source:VB Community Annotation]
LOC5575157	143.9	-2.02379	0.352633	-5.73908	9.52e-09	1.91e-07	AAEL000382	myosin motor, putative [Source:VB Community Annotation]
LOC5578886	563.427	-1.36907	0.238676	-5.73611	9.69e-09	1.94e-07	AAEL013887
LOC5578638	720.772	1.01703	0.177389	5.73332	9.85e-09	1.97e-07	AAEL013789
LOC110675578	39.5812	-2.31862	0.404709	-5.72911	1.01e-08	2.02e-07	AAEL020883
LOC110674687	65.3162	-2.23879	0.390847	-5.72804	1.02e-08	2.03e-07	AAEL003257
LOC110675203	217.214	-1.79202	0.312892	-5.72729	1.02e-08	2.03e-07	AAEL027332
LOC5580119	549.466	-1.66198	0.290186	-5.72728	1.02e-08	2.03e-07	AAEL023223
LOC110674735	232.141	-1.73029	0.302199	-5.72564	1.03e-08	2.05e-07	AAEL024086
LOC110678455	162.273	-4.33073	0.756426	-5.72526	1.03e-08	2.05e-07	AAEL026901
LOC5576514	27.0915	-2.38719	0.417285	-5.72076	1.06e-08	2.11e-07	AAEL022593
LOC5578490	242.77	-1.63559	0.286122	-5.71643	1.09e-08	2.16e-07	AAEL018303
LOC5580283	128.584	-1.92256	0.336483	-5.71368	1.11e-08	2.19e-07	AAEL026789
LOC5566766	164.05	-1.72458	0.301956	-5.71137	1.12e-08	2.22e-07	AAEL005633
LOC5570317	156.975	-1.09939	0.19257	-5.70903	1.14e-08	2.24e-07	AAEL008247	DNA polymerase alpha catalytic subunit [Source:VB Community Annotation]
LOC110678654	165.273	-1.77035	0.310299	-5.7053	1.16e-08	2.29e-07	AAEL023350
LOC5569225	457.133	-2.63714	0.46248	-5.70216	1.18e-08	2.33e-07	AAEL007500
LOC110679006	8951.1	-3.72172	0.652758	-5.70153	1.19e-08	2.34e-07	AAEL020035
LOC5576391	104.339	-1.84314	0.323297	-5.70106	1.19e-08	2.34e-07	AAEL014891	cytochrome P450 [Source:VB Community Annotation]	CYP6P12	v2
LOC110681284	53.543	-2.29086	0.402145	-5.69659	1.22e-08	2.4e-07	AAEL022515
LOC5576108	171.141	-1.69214	0.297107	-5.69539	1.23e-08	2.41e-07	AAEL002800	DNA polymerase epsilon, catalytic subunit [Source:VB Community Annotation]
LOC5574194	96.747	-1.38516	0.243664	-5.68472	1.31e-08	2.56e-07	AAEL002311	ADP-ribosylation factor, putative [Source:VB Community Annotation]
LOC5579193	35.4131	-2.48843	0.438198	-5.67879	1.36e-08	2.65e-07	AAEL003890	cytochrome P450 [Source:VB Community Annotation]
LOC5577252	96.782	-1.88893	0.332682	-5.67789	1.36e-08	2.66e-07	AAEL013111	glutamate transporter [Source:VB Community Annotation]
LOC5564936	348.475	-1.69534	0.298637	-5.67691	1.37e-08	2.67e-07	AAEL004502
LOC5568049	53.2831	-1.69358	0.298346	-5.67659	1.37e-08	2.67e-07	AAEL006496	steroid dehydrogenase [Source:VB Community Annotation]
LOC5567749	18.0567	-5.43452	0.958178	-5.67172	1.41e-08	2.75e-07	AAEL000124
LOC5574802	2267.65	0.831221	0.146769	5.66348	1.48e-08	2.88e-07	AAEL024570
LOC5572111	41.2476	-6.63451	1.17171	-5.66222	1.49e-08	2.9e-07	AAEL009524	alpha-amylase [Source:VB Community Annotation]	MAL1
LOC5567176	870.921	-1.23687	0.21879	-5.65323	1.57e-08	3.04e-07	AAEL000856	germ cell-less protein [Source:VB Community Annotation]
LOC5565257	1755.14	-1.1874	0.210042	-5.65319	1.57e-08	3.04e-07	AAEL004694	munc13-4 [Source:VB Community Annotation]
LOC110674690	626.504	-1.80801	0.319829	-5.65306	1.58e-08	3.04e-07	AAEL024377
LOC5566292	322.165	-1.67876	0.296979	-5.65278	1.58e-08	3.04e-07	AAEL000739
LOC5568139	2590.1	-1.22212	0.216432	-5.64667	1.64e-08	3.15e-07	AAEL020846
LOC5571080	7151.21	-1.18004	0.209222	-5.64014	1.7e-08	3.27e-07	AAEL008787	V-type proton ATPase catalytic subunit A (V-ATPase subunit A)(EC 3.6.3.14)(Vacuolar proton pump subunit alpha)(V-ATPase 69 kDa subunit) [Source:VB Community Annotation]	VhaA
LOC5564209	1143.77	-1.81268	0.321506	-5.63807	1.72e-08	3.3e-07	AAEL014361	amidase [Source:VB Community Annotation]
LOC5564989	2201.27	-2.07518	0.368439	-5.63235	1.78e-08	3.41e-07	AAEL004521
LOC5565708	706.273	-2.47737	0.440505	-5.62395	1.87e-08	3.58e-07	AAEL008596	spaetzle-like cytokine [Source:VB Community Annotation]	SPZ3A
LOC5574503	112.984	-1.86493	0.331942	-5.61823	1.93e-08	3.69e-07	AAEL002383	succinate dehydrogenase, putative [Source:VB Community Annotation]
LOC110677855	62.8483	-1.78819	0.318346	-5.61715	1.94e-08	3.71e-07	AAEL022436
LOC5577667	463.214	-0.752052	0.134111	-5.6077	2.05e-08	3.91e-07	AAEL017244
LOC5575570	21.2974	-5.63743	1.00622	-5.60257	2.11e-08	4.02e-07	AAEL002666	AMP dependent ligase [Source:VB Community Annotation]
LOC5569523	148.076	-1.59172	0.28418	-5.60112	2.13e-08	4.05e-07	AAEL007706
LOC5565899	373.421	-1.47983	0.264313	-5.5988	2.16e-08	4.1e-07	AAEL026540
LOC5575362	285.622	-2.33494	0.41728	-5.59561	2.2e-08	4.17e-07	AAEL011771
LOC5571920	124.117	-1.21099	0.216481	-5.59397	2.22e-08	4.21e-07	AAEL009411	DNA-binding protein smubp-2 [Source:VB Community Annotation]
LOC110677655	15.0203	-7.64344	1.36684	-5.59204	2.24e-08	4.25e-07	AAEL021699
LOC110677064	407.888	-4.61168	0.825411	-5.58712	2.31e-08	4.37e-07	AAEL020593
LOC5580112	154.688	1.74949	0.3132	5.58585	2.33e-08	4.39e-07	AAEL010938	l-asparaginase [Source:VB Community Annotation]
LOC5578267	1177.44	-0.936018	0.16758	-5.58549	2.33e-08	4.4e-07	AAEL003492	ribonuclease, putative [Source:VB Community Annotation]
LOC5576549	843.358	-0.985277	0.176552	-5.58065	2.4e-08	4.51e-07	AAEL019861
LOC5568073	227.13	-1.33579	0.239621	-5.57459	2.48e-08	4.67e-07	AAEL006535
LOC5563727	19.9171	-6.18747	1.11062	-5.57121	2.53e-08	4.75e-07	AAEL014082	odorant binding protein OBP34 [Source:VB Community Annotation]	OBP34
LOC110674836	833.644	1.51174	0.271369	5.57079	2.54e-08	4.76e-07	AAEL020033
LOC5571666	1552.67	-2.21931	0.398607	-5.56767	2.58e-08	4.84e-07	AAEL001671
LOC5574830	199.986	-2.01756	0.36245	-5.56643	2.6e-08	4.87e-07	AAEL011439	paramyosin, putative [Source:VB Community Annotation]
LOC5574653	344.176	-0.982194	0.176504	-5.56472	2.63e-08	4.91e-07	AAEL011287	ubiquitin specific protease [Source:VB Community Annotation]
LOC110680382	33.4219	-2.00182	0.359775	-5.5641	2.64e-08	4.92e-07	AAEL025956
LOC5569895	1486.95	1.48306	0.26662	5.56246	2.66e-08	4.96e-07	AAEL008006	3-hydroxyacyl-coa dehyrogenase [Source:VB Community Annotation]
LOC5577505	18	-6.92795	1.24583	-5.56093	2.68e-08	5e-07	AAEL020178
LOC110676874	848.579	1.61766	0.290944	5.56005	2.7e-08	5.02e-07	AAEL027210
LOC5567355	657.871	-1.44147	0.259457	-5.55573	2.76e-08	5.14e-07	AAEL023266
LOC5566533	287.204	-1.38559	0.249552	-5.5523	2.82e-08	5.23e-07	AAEL015201
LOC5573732	26113.2	-1.12157	0.202366	-5.5423	2.99e-08	5.53e-07	AAEL000291	V-type proton ATPase 16 kDa proteolipid subunit [Source:UniProtKB/Swiss-Prot;Acc:O16110]
LOC5567248	224.382	-1.61897	0.292163	-5.54135	3e-08	5.55e-07	AAEL024189
LOC5575365	268.109	-1.78522	0.322175	-5.54115	3e-08	5.55e-07	AAEL011766
LOC5572489	16.0859	-3.58832	0.647634	-5.54065	3.01e-08	5.56e-07	AAEL015412	metalloproteinase, putative [Source:VB Community Annotation]
LOC5577913	54.2558	3.03098	0.547233	5.53875	3.05e-08	5.62e-07	AAEL003358
LOC110680565	18.9129	-6.99845	1.26562	-5.52965	3.21e-08	5.91e-07	AAEL021682
LOC5572028	106.646	-1.43288	0.259144	-5.52929	3.22e-08	5.91e-07	AAEL000242	voltage-gated potassium channel [Source:VB Community Annotation]
LOC110675318	1575.38	-0.949161	0.171723	-5.52726	3.25e-08	5.97e-07	AAEL021342	V-type proton ATPase subunit [Source:UniProtKB/TrEMBL;Acc:Q1HQS1]
LOC5578831	3248.35	-1.1107	0.201252	-5.51892	3.41e-08	6.26e-07	AAEL013875	tetraspanin, putative [Source:VB Community Annotation]
LOC5579332	18.1955	-5.43183	0.984963	-5.51476	3.49e-08	6.4e-07	AAEL015567	odorant binding protein OBP63 [Source:VB Community Annotation]	OBP63
LOC5568048	134.874	-2.07404	0.376299	-5.51169	3.55e-08	6.5e-07	AAEL006479
LOC110676903	64.5089	2.00794	0.3644	5.51027	3.58e-08	6.55e-07	AAEL020835
LOC5568398	38.4376	-2.20001	0.399476	-5.50723	3.65e-08	6.65e-07	AAEL006758
LOC5569107	39.4389	1.99493	0.36227	5.50675	3.66e-08	6.66e-07	AAEL007371
LOC5568513	72.5666	-3.72647	0.676959	-5.50471	3.7e-08	6.73e-07	AAEL006919	serine-type enodpeptidase, [Source:VB Community Annotation]
LOC110677841	18.9081	-5.53707	1.00592	-5.50447	3.7e-08	6.73e-07	AAEL023400
LOC5567363	69.8053	-3.08257	0.560133	-5.50328	3.73e-08	6.77e-07	AAEL006027	lipase [Source:VB Community Annotation]
LOC5578057	298.487	1.53903	0.27982	5.50006	3.8e-08	6.89e-07	AAEL013489	sugar transporter [Source:VB Community Annotation]
LOC110679199	218.145	-1.59863	0.290818	-5.49703	3.86e-08	7e-07	AAEL023415
LOC110680586	117.658	-1.42119	0.258589	-5.49593	3.89e-08	7.03e-07	AAEL020133
LOC5575830	63.5437	-1.32601	0.241321	-5.49478	3.91e-08	7.07e-07	AAEL012096
LOC110674641	23.9744	-8.31742	1.51506	-5.48984	4.02e-08	7.26e-07	AAEL024891
LOC5580113	85.1438	-2.0584	0.375343	-5.48403	4.16e-08	7.5e-07	AAEL020441
LOC23687759	177.166	-1.03156	0.188117	-5.4836	4.17e-08	7.5e-07	AAEL022698
LOC5574540	59.8717	1.89691	0.345926	5.48357	4.17e-08	7.5e-07	AAEL011213
LOC110676401	10.1721	-7.08451	1.29205	-5.48314	4.18e-08	7.51e-07	AAEL025615
LOC110675631	114.296	-1.66797	0.304245	-5.48234	4.2e-08	7.53e-07	AAEL022730
LOC5567377	1417.88	1.03834	0.189502	5.47933	4.27e-08	7.65e-07	AAEL006022	myotubularin [Source:VB Community Annotation]
LOC5577628	77.9232	-2.20064	0.401774	-5.47731	4.32e-08	7.73e-07	AAEL003217	dynein light chain [Source:VB Community Annotation]
LOC110674063	127.347	-1.1854	0.216628	-5.47204	4.45e-08	7.95e-07	AAEL023680
LOC5567680	49717.3	-1.98774	0.363368	-5.47033	4.49e-08	8.02e-07	AAEL006259	long wavelength sensitive opsin [Source:VB Community Annotation]	GPROP2
LOC5567836	444.571	-1.0633	0.194453	-5.46815	4.55e-08	8.11e-07	AAEL001009	dab2-interacting protein [Source:VB Community Annotation]
LOC110681201	204.001	-1.10862	0.202862	-5.46488	4.63e-08	8.25e-07	AAEL020314
LOC5579195	207.203	-1.40597	0.257451	-5.46111	4.73e-08	8.42e-07	AAEL020488
LOC5578654	2364.16	0.767395	0.140538	5.46043	4.75e-08	8.44e-07	AAEL024913
LOC5577641	41.7124	-2.01685	0.369577	-5.45719	4.84e-08	8.59e-07	AAEL024943
LOC5573031	24181	-1.37702	0.252358	-5.45663	4.85e-08	8.6e-07	AAEL010205
LOC110674356	16.5492	-3.19791	0.586323	-5.45418	4.92e-08	8.71e-07	AAEL024537
LOC5570871	383.968	1.87158	0.34326	5.45236	4.97e-08	8.79e-07	AAEL019868
LOC5566006	219.794	-1.18975	0.218304	-5.44998	5.04e-08	8.9e-07	AAEL005109	WD-repeat protein [Source:VB Community Annotation]
LOC5578204	193.725	-1.61019	0.295676	-5.44579	5.16e-08	9.1e-07	AAEL003452
LOC5575744	425.734	-1.50372	0.276158	-5.44515	5.18e-08	9.12e-07	AAEL012056	oxysterol-binding protein related protein (ORP1) [Source:VB Community Annotation]	ORP1
LOC5565381	128.388	-3.21657	0.590788	-5.44455	5.19e-08	9.14e-07	AAEL019993
LOC110677020	26.415	-2.61011	0.479507	-5.44331	5.23e-08	9.2e-07	AAEL021088
LOC5568422	111.196	-1.24917	0.229673	-5.43891	5.36e-08	9.41e-07	AAEL006841	rage-1 [Source:VB Community Annotation]
LOC110680888	317.268	-1.62902	0.29967	-5.43604	5.45e-08	9.56e-07	AAEL027394
LOC110677276	98.8021	1.19514	0.219922	5.43437	5.5e-08	9.63e-07	AAEL024645
LOC110674506	30.4128	2.30311	0.424466	5.42591	5.77e-08	1.01e-06	AAEL024705
LOC5567639	496.175	-1.39242	0.256652	-5.42531	5.79e-08	1.01e-06	AAEL006239	glycerol kinase [Source:VB Community Annotation]
LOC5580076	14.7482	-5.13359	0.94801	-5.41512	6.12e-08	1.07e-06	AAEL002138	triacylglycerol lipase, putative [Source:VB Community Annotation]
LOC110679626	161.764	-1.50021	0.277104	-5.41388	6.17e-08	1.08e-06	AAEL027263
LOC110676631	9.42047	-6.97215	1.28853	-5.41094	6.27e-08	1.09e-06	AAEL022898
LOC5578596	2321.46	0.740112	0.136832	5.40893	6.34e-08	1.1e-06	AAEL013778	F-actin capping protein alpha [Source:VB Community Annotation]
LOC5570390	195.846	-2.79566	0.517048	-5.40696	6.41e-08	1.11e-06	AAEL008295	pupal cuticle protein 78E, putative [Source:VB Community Annotation]
LOC5569491	231.182	-2.72628	0.504707	-5.4017	6.6e-08	1.15e-06	AAEL007673	alpha-amylase [Source:VB Community Annotation]
LOC5575633	335.689	-1.38643	0.256688	-5.40122	6.62e-08	1.15e-06	AAEL011967	DNA photolyase [Source:VB Community Annotation]	cry2
LOC5566925	52.1067	-1.72753	0.319923	-5.39982	6.67e-08	1.15e-06	AAEL005694
LOC5572146	114.701	-1.69754	0.314427	-5.39885	6.71e-08	1.16e-06	AAEL009564	outer mitochondrial translocase subunit, putative [Source:VB Community Annotation]
LOC5565692	109.503	-3.02826	0.561025	-5.39772	6.75e-08	1.17e-06	AAEL004921
LOC5568482	551.232	-0.999273	0.185264	-5.39377	6.9e-08	1.19e-06	AAEL006880	Rab32 [Source:UniProtKB/TrEMBL;Acc:A0A1S4FEX4]
LOC5576136	153.493	-1.08873	0.201856	-5.39357	6.91e-08	1.19e-06	AAEL024236
LOC5577670	82.0914	-2.16189	0.400858	-5.39316	6.92e-08	1.19e-06	AAEL025089
LOC5568103	2101.46	0.661617	0.12272	5.39127	7e-08	1.2e-06	AAEL006538	peroxisomal membrane protein 2, pxmp2 [Source:VB Community Annotation]
LOC110675408	704.896	-0.852945	0.15833	-5.38715	7.16e-08	1.23e-06	AAEL025591
LOC5573541	199.777	-1.86396	0.346008	-5.38705	7.16e-08	1.23e-06	AAEL010583	ubiquitin conjugating enzyme 7 interacting protein [Source:VB Community Annotation]
LOC110674830	64.127	-1.79011	0.332825	-5.37853	7.51e-08	1.29e-06	AAEL021231
LOC5566176	2986.84	-1.38904	0.258394	-5.37565	7.63e-08	1.3e-06	AAEL005218
LOC5569224	110.131	-1.32374	0.246251	-5.37557	7.63e-08	1.3e-06	AAEL007493
LOC110678373	119.215	-1.79501	0.334432	-5.36733	7.99e-08	1.36e-06	AAEL027307
LOC5575718	6437.56	-1.06051	0.197593	-5.36712	8e-08	1.36e-06	AAEL012035	vacuolar ATP synthase subunit e [Source:VB Community Annotation]
LOC5580047	143.784	-1.84032	0.343033	-5.36486	8.1e-08	1.38e-06	AAEL010232
LOC110675358	139.836	2.01483	0.375784	5.36168	8.25e-08	1.4e-06	AAEL025157
LOC110674492	77.6008	-2.82413	0.527041	-5.35846	8.39e-08	1.43e-06	AAEL020005
LOC5568406	314.716	1.33378	0.249251	5.35117	8.74e-08	1.48e-06	AAEL006823	AMP dependent ligase [Source:VB Community Annotation]
LOC5569405	17.2339	-3.93599	0.735729	-5.34978	8.81e-08	1.49e-06	AAEL021909
LOC5564267	21.8426	3.87298	0.723984	5.34953	8.82e-08	1.49e-06	AAEL014363
LOC110675741	516.323	-2.76661	0.517224	-5.34895	8.85e-08	1.5e-06	AAEL023438
LOC110677188	20.9542	-2.47174	0.462115	-5.34876	8.86e-08	1.5e-06	AAEL023452
LOC5575137	1020.73	-0.974156	0.182179	-5.34723	8.93e-08	1.51e-06	AAEL000378	integrin-linked protein kinase 2 (ilk-2) [Source:VB Community Annotation]
LOC5569245	844.261	-0.764338	0.143004	-5.34486	9.05e-08	1.53e-06	AAEL023829
LOC5579048	27.7752	2.35901	0.44156	5.34244	9.17e-08	1.54e-06	AAEL013983	hexamerin 2 beta [Source:VB Community Annotation]
LOC5573146	25.8452	-3.69989	0.692803	-5.34047	9.27e-08	1.56e-06	AAEL001981	protein serine/threonine kinase, putative [Source:VB Community Annotation]
LOC5575483	242.39	-1.49804	0.280622	-5.3383	9.38e-08	1.58e-06	AAEL011869
LOC5564196	190.293	1.17741	0.220663	5.33577	9.51e-08	1.6e-06	AAEL014348	caspase (short) [Source:VB Community Annotation]	CASPS8
LOC5575133	499.1	-1.47453	0.27641	-5.33459	9.58e-08	1.61e-06	AAEL000314	malate dehydrogenase [Source:VB Community Annotation]
LOC5576198	177.886	1.13229	0.212533	5.32759	9.95e-08	1.67e-06	AAEL012390
LOC5574478	341.419	1.25243	0.235316	5.32233	1.02e-07	1.71e-06	AAEL002388	zinc finger protein [Source:VB Community Annotation]
LOC5574799	2029.59	1.09202	0.205186	5.32208	1.03e-07	1.71e-06	AAEL002487	P53 regulated pa26 nuclear protein sestrin [Source:VB Community Annotation]
LOC5574835	2299.6	1.07278	0.201734	5.31781	1.05e-07	1.75e-06	AAEL011436	myosin xv [Source:VB Community Annotation]
LOC110678707	9.29549	-6.95724	1.30887	-5.31545	1.06e-07	1.77e-06	AAEL020039
LOC5564328	532.818	-2.14944	0.404974	-5.30761	1.11e-07	1.85e-06	AAEL000578
LOC5564450	155.961	-1.63646	0.308471	-5.30507	1.13e-07	1.87e-06	AAEL004857
LOC5568098	415.741	0.997921	0.188208	5.30223	1.14e-07	1.9e-06	AAEL006560	cop-coated vesicle membrane protein P24 [Source:VB Community Annotation]
LOC110680243	72.5593	2.79507	0.527195	5.30178	1.15e-07	1.9e-06	AAEL021404
LOC110681443	160.314	-1.54268	0.291052	-5.30035	1.16e-07	1.92e-06	AAEL020051
LOC5568609	293.627	-1.90718	0.359883	-5.29945	1.16e-07	1.92e-06	AAEL006978	protein-glutamine gamma-glutamyltransferase [Source:VB Community Annotation]
LOC5578161	185.689	1.21006	0.228378	5.29851	1.17e-07	1.93e-06	AAEL013542	elongase, putative [Source:VB Community Annotation]
LOC110676418	31.2479	1.95048	0.368159	5.29794	1.17e-07	1.93e-06	AAEL027172
LOC5563841	204.825	-2.33666	0.441146	-5.2968	1.18e-07	1.94e-06	AAEL014171
LOC5568060	862.444	-1.57766	0.297938	-5.29527	1.19e-07	1.96e-06	AAEL006498	long wavelength sensitive opsin [Source:VB Community Annotation]	GPROP1
LOC110680887	592.231	-1.5765	0.297832	-5.29324	1.2e-07	1.98e-06	AAEL023932
LOC110674644	137.379	-1.38752	0.262321	-5.2894	1.23e-07	2.02e-06	AAEL026885
LOC23687848	31.6188	-2.24729	0.425529	-5.28116	1.28e-07	2.11e-06	AAEL025638
LOC5574082	179.22	-1.83148	0.34705	-5.27729	1.31e-07	2.15e-06	AAEL002275	kv channel-interacting protein 1 (KChIP1) , putative [Source:VB Community Annotation]
LOC110681508	119.517	-1.79854	0.341175	-5.2716	1.35e-07	2.22e-06	AAEL022145
LOC110680889	298.545	-1.54916	0.293916	-5.27077	1.36e-07	2.22e-06	AAEL024685
LOC5568061	298.545	-1.54916	0.293916	-5.27077	1.36e-07	2.22e-06	AAEL024685
LOC5572135	127.893	-1.56099	0.296397	-5.26653	1.39e-07	2.27e-06	AAEL009544
LOC5566151	4892.75	-1.14761	0.217921	-5.26619	1.39e-07	2.27e-06	AAEL024598
LOC110674672	325.882	2.80645	0.533013	5.26526	1.4e-07	2.28e-06	AAEL026926
LOC5574677	1678.26	-1.54167	0.292836	-5.26461	1.4e-07	2.29e-06	AAEL011319
LOC5573862	10733.5	-1.36909	0.260277	-5.26013	1.44e-07	2.34e-06	AAEL010783	sodium/potassium-dependent ATPase beta-2 subunit [Source:VB Community Annotation]
LOC5567068	5282.91	-1.11747	0.212565	-5.25706	1.46e-07	2.38e-06	AAEL005798	ATP synthase subunit beta vacuolar [Source:VB Community Annotation]
LOC5564400	3916.55	-0.652944	0.124276	-5.25401	1.49e-07	2.42e-06	AAEL004235	kinesin-like protein Klp10A [Source:VB Community Annotation]
LOC5575790	31704.4	-1.2944	0.246486	-5.25141	1.51e-07	2.45e-06	AAEL012062	Na+/K+ ATPase alpha subunit [Source:VB Community Annotation]
LOC5579651	2007.51	-1.11969	0.213279	-5.24989	1.52e-07	2.46e-06	AAEL003952	calpain 4, 6, 7, invertebrate [Source:VB Community Annotation]
LOC5575646	59.9759	-1.39521	0.266081	-5.24357	1.58e-07	2.55e-06	AAEL011986
LOC5565143	363.897	-1.09005	0.208085	-5.23848	1.62e-07	2.62e-06	AAEL004607	Adenylyltransferase and sulfurtransferase MOCS3 (Molybdenum cofactor synthesis protein 3) [Includes Adenylyltransferase MOCS3(EC 2.7.7.-)(Sulfur carrier protein MOCS2A adenylyltransferase)(EC 2.7.7.n4);Sulfurtransferase MOCS3(EC 2.8.1.-)(Sulfur carrier protein MOCS2A sulfurtransferase)(EC 2.8.1.n1)] [Source:VB Community Annotation]
LOC110675486	162.02	-1.86223	0.3558	-5.23392	1.66e-07	2.68e-06	AAEL022202
LOC5565096	17.4915	-7.86101	1.50265	-5.23144	1.68e-07	2.71e-06	AAEL004585
LOC5570685	86.3593	-1.31372	0.251197	-5.22987	1.7e-07	2.73e-06	AAEL008496
LOC5569753	1360.45	-2.07597	0.397327	-5.22483	1.74e-07	2.8e-06	AAEL026440
LOC5570908	203.51	-1.28632	0.246229	-5.22407	1.75e-07	2.81e-06	AAEL001483
LOC5564745	295.869	-0.971736	0.186016	-5.22393	1.75e-07	2.81e-06	AAEL014600	4-hydroxyphenylpyruvate dioxygenase [Source:VB Community Annotation]
LOC5574135	121.07	-1.10593	0.211707	-5.22386	1.75e-07	2.81e-06	AAEL019741
LOC5570684	313.742	-1.85057	0.354399	-5.22172	1.77e-07	2.84e-06	AAEL008493	zinc finger protein [Source:VB Community Annotation]
LOC5565773	3007.45	-3.25409	0.623952	-5.21529	1.84e-07	2.94e-06	AAEL004987
LOC110681507	127.179	-1.79391	0.343985	-5.2151	1.84e-07	2.94e-06	AAEL026789
LOC5565455	456.804	1.05508	0.20245	5.21156	1.87e-07	2.99e-06	AAEL000654	n-acetylgalactosaminyltransferase [Source:VB Community Annotation]
LOC5569747	258.066	-1.02156	0.19604	-5.21101	1.88e-07	3e-06	AAEL025379
LOC5578567	280.265	1.33978	0.257317	5.20672	1.92e-07	3.06e-06	AAEL018265	C-Type lectin (CTL) [Source:UniProtKB/TrEMBL;Acc:A0A1S4G7E6]	CTL9
LOC5569881	205.121	1.36665	0.262509	5.20613	1.93e-07	3.07e-06	AAEL019649
LOC5572006	69.6794	-1.73757	0.333766	-5.20596	1.93e-07	3.07e-06	AAEL009481
LOC5569051	52.4671	-2.31902	0.445512	-5.20529	1.94e-07	3.08e-06	AAEL019744
LOC5571228	34.1453	-1.81083	0.347948	-5.20433	1.95e-07	3.09e-06	AAEL008931	inward-rectifying potassium channel [Source:VB Community Annotation]	Kir2B	Irk2
LOC5571293	11700.9	-2.2147	0.425903	-5.20002	1.99e-07	3.16e-06	AAEL001593	glycerol-3-phosphate dehydrogenase [Source:VB Community Annotation]
LOC110676130	157.432	-2.29674	0.441733	-5.19939	2e-07	3.17e-06	AAEL022720
LOC5570734	34.1136	-2.09128	0.402374	-5.19735	2.02e-07	3.2e-06	AAEL008511
LOC5571823	26.1698	-2.72153	0.523791	-5.19584	2.04e-07	3.22e-06	AAEL001686
LOC5573070	1101.2	-1.2765	0.245688	-5.19562	2.04e-07	3.22e-06	AAEL022986
LOC5574864	244.125	1.12333	0.216378	5.19152	2.09e-07	3.29e-06	AAEL011465
LOC110676200	33.5597	-2.00203	0.385674	-5.19098	2.09e-07	3.29e-06	AAEL024240
LOC5576018	218.904	-1.57065	0.30266	-5.18949	2.11e-07	3.32e-06	AAEL012248	Histamine-gated chloride channel subunit [Source:UniProtKB/TrEMBL;Acc:A0A1S4FVK1]
LOC110674467	40.783	2.99556	0.577305	5.18886	2.12e-07	3.32e-06	AAEL027972
LOC5563689	339.105	-1.54303	0.298049	-5.17709	2.25e-07	3.54e-06	AAEL000551
LOC5577757	135.505	2.15014	0.415345	5.17674	2.26e-07	3.54e-06	AAEL003294	fibrinogen and fibronectin [Source:VB Community Annotation]
LOC5573468	557.163	-0.864653	0.167107	-5.17425	2.29e-07	3.58e-06	AAEL010516	autophagy related gene [Source:VB Community Annotation]	APG4A
LOC5565281	44.1789	-1.63314	0.315782	-5.17173	2.32e-07	3.63e-06	AAEL013640	lung carbonyl reductase [Source:VB Community Annotation]
LOC110675246	343.334	0.888714	0.172079	5.16456	2.41e-07	3.77e-06	AAEL019976
LOC5580326	300.564	-1.40676	0.272418	-5.16398	2.42e-07	3.77e-06	AAEL013072
LOC5570057	113.501	-1.71126	0.331445	-5.16302	2.43e-07	3.79e-06	AAEL000184
LOC5580295	147.167	-1.41133	0.273401	-5.16211	2.44e-07	3.8e-06	AAEL003002
LOC5573368	239.442	-2.72437	0.527796	-5.16179	2.45e-07	3.81e-06	AAEL027447
LOC5565069	165.206	-1.80469	0.349763	-5.15974	2.47e-07	3.84e-06	AAEL004572
LOC5576882	713.947	-1.44371	0.279811	-5.15957	2.48e-07	3.84e-06	AAEL003035	short wavelength sensitive opsin [Source:VB Community Annotation]	GPROP9	GPROP9_2
LOC5573832	31.337	-2.21476	0.429391	-5.15791	2.5e-07	3.87e-06	AAEL010749
LOC5576094	1516.59	1.56017	0.302557	5.15661	2.51e-07	3.9e-06	AAEL002780
LOC5576202	241.201	1.33236	0.258538	5.15344	2.56e-07	3.96e-06	AAEL012393
LOC5566551	1446.92	0.919556	0.178537	5.1505	2.6e-07	4.02e-06	AAEL005471	Sec61 protein complex gamma subunit, putative [Source:VB Community Annotation]
LOC5567979	851.437	-0.926284	0.1799	-5.1489	2.62e-07	4.05e-06	AAEL006412	sodium- and chloride-dependent neurotransmitter transporter [Source:VB Community Annotation]
LOC110676717	36.2153	-2.45078	0.476061	-5.14804	2.63e-07	4.06e-06	AAEL023852
LOC5570133	224.145	-1.38625	0.269327	-5.1471	2.65e-07	4.08e-06	AAEL008108	guanine nucleotide-binding protein beta 2 (g protein beta2) [Source:VB Community Annotation]
LOC5572102	120.27	-1.22438	0.237894	-5.14675	2.65e-07	4.08e-06	AAEL009515
LOC110673976	87.9651	2.70188	0.525056	5.14589	2.66e-07	4.1e-06	AAEL019902
LOC5565118	189.165	-1.36012	0.264326	-5.14561	2.67e-07	4.1e-06	AAEL014734
LOC5570581	436.886	0.764049	0.148573	5.14257	2.71e-07	4.16e-06	AAEL008393	phosphatidylserine synthase [Source:VB Community Annotation]
LOC5563591	271.159	-1.68888	0.329286	-5.12891	2.91e-07	4.47e-06	AAEL000006	phosphoenolpyruvate carboxykinase [Source:VB Community Annotation]
LOC5573132	486.016	-1.98276	0.386698	-5.12742	2.94e-07	4.5e-06	AAEL002023	imaginal disc growth factor [Source:VB Community Annotation]
LOC5565450	29.6616	-5.45349	1.06635	-5.11414	3.15e-07	4.82e-06	AAEL000651	alpha-amylase [Source:VB Community Annotation]
LOC5568591	381.441	-1.1105	0.217341	-5.1095	3.23e-07	4.94e-06	AAEL020302
LOC5569243	1288.67	1.20524	0.236035	5.10618	3.29e-07	5.02e-06	AAEL007505	iroquois-class homeodomain protein irx [Source:VB Community Annotation]
LOC5573842	184.414	-1.066	0.208782	-5.10581	3.29e-07	5.03e-06	AAEL021227
LOC23687959	32.8947	-2.59951	0.50945	-5.10258	3.35e-07	5.11e-06	AAEL017539	cytochrome P450 [Source:VB Community Annotation]	CYP6BY1
LOC5574073	1738.79	-0.843547	0.165349	-5.10163	3.37e-07	5.12e-06	AAEL010911	Kelch-like protein diablo [Source:UniProtKB/Swiss-Prot;Acc:Q16RL8]	dbo
LOC110676508	17.3133	-2.87502	0.563562	-5.10152	3.37e-07	5.12e-06	AAEL024496
LOC110681441	89.6419	-3.02137	0.592258	-5.10144	3.37e-07	5.12e-06	AAEL026810
LOC5568287	109.244	-1.33999	0.263155	-5.09204	3.54e-07	5.38e-06	AAEL006720
LOC110676402	13.3226	-4.97705	0.977568	-5.09126	3.56e-07	5.39e-06	AAEL021914
LOC5568557	49.7336	-2.20538	0.43339	-5.08866	3.61e-07	5.46e-06	AAEL001128	AMP dependent coa ligase [Source:VB Community Annotation]
LOC5570231	12.8839	-4.92775	0.968455	-5.08826	3.61e-07	5.47e-06	AAEL008182
LOC5568612	115.826	1.27027	0.249698	5.08722	3.63e-07	5.49e-06	AAEL006965	NBP2b protein, putative [Source:VB Community Annotation]
LOC5579024	173.254	0.985199	0.194094	5.07587	3.86e-07	5.82e-06	AAEL013964	60S ribosomal protein L20, putative [Source:UniProtKB/TrEMBL;Acc:Q16HN7]	RpL20
LOC5571997	706.165	-1.26517	0.249441	-5.07203	3.94e-07	5.94e-06	AAEL009487
LOC110681509	63.0104	-1.78241	0.351568	-5.0699	3.98e-07	6e-06	AAEL027953
LOC5577119	14.22	-5.67665	1.12037	-5.06678	4.05e-07	6.09e-06	AAEL013018	odorant binding protein OBP56 [Source:VB Community Annotation]	OBP56
LOC5576017	32.0374	-3.57203	0.705262	-5.06483	4.09e-07	6.15e-06	AAEL012255	leucine-rich immune protein (Short) [Source:VB Community Annotation]	LRIM13
LOC5569069	310.767	-1.48516	0.293494	-5.06029	4.19e-07	6.29e-06	AAEL001204	sterol o-acyltransferase [Source:VB Community Annotation]
LOC110674702	34.3	-2.12958	0.421381	-5.05382	4.33e-07	6.5e-06	AAEL025891
LOC110676999	109.681	-1.55252	0.307299	-5.05215	4.37e-07	6.55e-06	AAEL020419
LOC110674405	8.42386	-6.80378	1.34695	-5.05126	4.39e-07	6.57e-06	AAEL022823
LOC110681176	98.1537	-1.24022	0.245537	-5.05106	4.39e-07	6.57e-06	AAEL027395
LOC5571044	1227.96	0.752754	0.14903	5.05102	4.39e-07	6.57e-06	AAEL008773	laminin A chain, putative [Source:VB Community Annotation]
LOC5569279	413.057	-0.852368	0.168806	-5.0494	4.43e-07	6.62e-06	AAEL007521	importin beta-2 [Source:VB Community Annotation]
LOC5567575	1664.55	-1.18629	0.234977	-5.04854	4.45e-07	6.64e-06	AAEL006171	n-myc downstream regulated [Source:VB Community Annotation]
LOC5572478	1185.74	-0.904187	0.179101	-5.04847	4.45e-07	6.64e-06	AAEL009808	ATP synthase subunit d [Source:VB Community Annotation]
LOC5576146	25.2682	-2.47595	0.491172	-5.04089	4.63e-07	6.9e-06	AAEL012350	lipase 1 precursor [Source:VB Community Annotation]
LOC110680371	123.187	-1.61652	0.321099	-5.03434	4.79e-07	7.13e-06	AAEL024469
LOC5572036	449.649	-1.23759	0.245915	-5.0326	4.84e-07	7.19e-06	AAEL000250	forkhead box protein (AaegFOXP) [Source:VB Community Annotation]
LOC5563904	436.569	0.802039	0.159513	5.02805	4.95e-07	7.35e-06	AAEL003993	cyclohex-1-ene-1-carboxyl-CoA hydratase, putative [Source:VB Community Annotation]
LOC5573857	24.6293	3.24997	0.646582	5.02638	5e-07	7.41e-06	AAEL010775
LOC5577356	2485.05	-1.05344	0.20979	-5.02141	5.13e-07	7.6e-06	AAEL000417	monocarboxylate transporter [Source:VB Community Annotation]
LOC110679507	76.0236	-1.60501	0.319698	-5.0204	5.16e-07	7.63e-06	AAEL025552
LOC5570132	160.801	-1.00996	0.20126	-5.01821	5.22e-07	7.71e-06	AAEL008111
LOC5567283	27.0754	-1.94475	0.387546	-5.01811	5.22e-07	7.71e-06	AAEL005945	GPCR Dopamine Family [Source:VB Community Annotation]	GPRDOP4
LOC5566392	1009.77	-0.995466	0.198465	-5.01582	5.28e-07	7.79e-06	AAEL005342
LOC5573819	588.617	-1.19503	0.238562	-5.0093	5.46e-07	8.05e-06	AAEL010742	Elongation factor G, mitochondrial Precursor (EF-Gmt)(Elongation factor G 1, mitochondrial)(mEF-G 1)(Elongation factor G1) [Source:VB Community Annotation]
LOC5571071	31.6495	-1.69277	0.338055	-5.00737	5.52e-07	8.12e-06	AAEL008791
LOC5572162	394.084	-1.19165	0.238065	-5.00554	5.57e-07	8.19e-06	AAEL020191
LOC5579887	704.402	-1.02701	0.205249	-5.00372	5.62e-07	8.26e-06	AAEL001024	mitochondrial carrier protein [Source:VB Community Annotation]
LOC5575863	872.415	-1.49564	0.298957	-5.00288	5.65e-07	8.29e-06	AAEL012131	cationic amino acid transporter [Source:VB Community Annotation]
LOC5566900	2257.6	-1.19171	0.238287	-5.00116	5.7e-07	8.36e-06	AAEL000824
LOC110676318	55.8185	-2.14121	0.42817	-5.00083	5.71e-07	8.36e-06	AAEL027058
LOC110678773	487.772	0.951977	0.190401	4.99986	5.74e-07	8.4e-06	AAEL021877
LOC5565255	216.695	-1.12862	0.225989	-4.99413	5.91e-07	8.64e-06	AAEL004685	succinate semialdehyde dehydrogenase [Source:VB Community Annotation]
LOC110676497	92.8707	-1.67072	0.334584	-4.99342	5.93e-07	8.67e-06	AAEL024886
LOC5577949	37.9136	-1.99403	0.399354	-4.99314	5.94e-07	8.67e-06	AAEL013432	serine protease, putative [Source:VB Community Annotation]
LOC5578882	2039.73	1.76528	0.353759	4.99007	6.04e-07	8.8e-06	AAEL013885
LOC5570221	58.9488	1.52084	0.305248	4.98231	6.28e-07	9.15e-06	AAEL008165
LOC110678537	113.172	-1.24607	0.250298	-4.97833	6.41e-07	9.33e-06	AAEL027776
LOC110677631	724.088	-1.32066	0.26535	-4.97704	6.46e-07	9.39e-06	AAEL020922
LOC5575688	101.607	-1.74687	0.35105	-4.97614	6.49e-07	9.42e-06	AAEL012007
LOC110681159	3444.21	0.530889	0.106748	4.9733	6.58e-07	9.55e-06	AAEL021894
LOC5567540	99.0868	-1.83995	0.37003	-4.97245	6.61e-07	9.58e-06	AAEL006143
LOC5580314	14.0589	-4.03864	0.812437	-4.97102	6.66e-07	9.64e-06	AAEL012901
LOC5579929	107.022	1.52247	0.306392	4.96902	6.73e-07	9.73e-06	AAEL006805	cytochrome P450 [Source:VB Community Annotation]	CYP9J2
LOC5568355	2963.93	0.742267	0.149397	4.96844	6.75e-07	9.75e-06	AAEL001061	glutathione S-transferase (GSTD1) [Source:VB Community Annotation]	GSTD1
LOC110680232	113.675	-0.956221	0.192631	-4.964	6.91e-07	9.97e-06	AAEL027987
LOC5573133	1845.25	-1.91594	0.386066	-4.96272	6.95e-07	1e-05	AAEL001963	protein serine/threonine kinase, putative [Source:VB Community Annotation]
LOC5577682	349.793	0.8201	0.165315	4.96084	7.02e-07	1.01e-05	AAEL013321
LOC5576523	121.378	1.82984	0.369157	4.95681	7.17e-07	1.03e-05	AAEL012577
LOC5576141	19.6778	3.51603	0.712224	4.9367	7.95e-07	1.14e-05	AAEL023423
LOC5573701	711.56	1.32703	0.268875	4.9355	7.99e-07	1.15e-05	AAEL010680
LOC5571025	86.5328	-2.26867	0.45993	-4.93264	8.11e-07	1.16e-05	AAEL008753
LOC110678621	9.07503	-6.90829	1.40156	-4.92901	8.26e-07	1.19e-05	AAEL024687
LOC5564296	740.104	0.909246	0.184495	4.92829	8.3e-07	1.19e-05	AAEL014393	Lactoylglutathione lyase [Source:UniProtKB/TrEMBL;Acc:A0A1S4G1K4]
LOC5572140	29.4987	-2.43523	0.494337	-4.92626	8.38e-07	1.2e-05	AAEL022562
LOC5566120	1602.97	-1.82226	0.369933	-4.92591	8.4e-07	1.2e-05	AAEL005188	alpha-galactosidase/alpha-n-acetylgalactosaminidase [Source:VB Community Annotation]
LOC5578117	826.586	0.819185	0.166306	4.92578	8.4e-07	1.2e-05	AAEL003417	mitochondrial ATPase inhibitor, putative [Source:VB Community Annotation]
LOC110674215	84.8778	-1.63104	0.331294	-4.92323	8.51e-07	1.21e-05	AAEL020470
LOC5564786	1912.63	-1.285	0.261193	-4.91972	8.67e-07	1.24e-05	AAEL004440	tubulin-specific chaperone e [Source:VB Community Annotation]
LOC5565339	42.9258	-1.98988	0.404663	-4.91736	8.77e-07	1.25e-05	AAEL014825
LOC110675597	62.7562	-1.48552	0.302164	-4.91627	8.82e-07	1.25e-05	AAEL025809
LOC5571231	156.905	-1.85655	0.377641	-4.91616	8.83e-07	1.25e-05	AAEL008932	inward-rectifying potassium channel [Source:VB Community Annotation]	Kir1	Irk1
LOC5565997	9731.15	1.29176	0.26299	4.91182	9.02e-07	1.28e-05	AAEL009588	expressed protein (HR3) [Source:VB Community Annotation]
LOC5567008	273.721	-1.50239	0.305996	-4.90981	9.12e-07	1.29e-05	AAEL005754	cgmp-dependent protein kinase [Source:VB Community Annotation]
LOC110677731	82.6325	-1.17548	0.239634	-4.90532	9.33e-07	1.32e-05	AAEL021862
LOC5563874	201.79	-1.41962	0.289419	-4.90506	9.34e-07	1.32e-05	AAEL014196
LOC5569632	1069.82	-1.0843	0.22124	-4.901	9.53e-07	1.35e-05	AAEL007777	vacuolar ATP synthase subunit S1 [Source:VB Community Annotation]
LOC5568905	561.278	3.10927	0.634481	4.90049	9.56e-07	1.35e-05	AAEL007198	Osiris, putative [Source:VB Community Annotation]
LOC5571156	1439.74	-1.32079	0.26954	-4.90015	9.58e-07	1.35e-05	AAEL008837	ubiquitin-conjugating enzyme E2r [Source:VB Community Annotation]
LOC110680404	595.415	-1.17889	0.240774	-4.89626	9.77e-07	1.38e-05	AAEL024119
LOC5570013	211.092	-2.47117	0.505108	-4.89236	9.96e-07	1.4e-05	AAEL000173	chromatin assembly factor-I p150 subunit, putative [Source:VB Community Annotation]
LOC5576334	99.1091	-1.25143	0.255802	-4.89217	9.97e-07	1.4e-05	AAEL000403
LOC5572315	256.332	-1.59911	0.32688	-4.89203	9.98e-07	1.4e-05	AAEL009705
LOC5577380	1090.46	0.947392	0.19387	4.88674	1.03e-06	1.44e-05	AAEL000415	AMP dependent coa ligase [Source:VB Community Annotation]
LOC110678861	128.136	-1.04741	0.214365	-4.88613	1.03e-06	1.44e-05	AAEL025889
LOC5579208	168.304	-1.10092	0.225507	-4.88199	1.05e-06	1.47e-05	AAEL014046	sex-determining protein fem-1 [Source:VB Community Annotation]
LOC110677252	39.2332	1.55817	0.319358	4.87906	1.07e-06	1.49e-05	AAEL021895
LOC5578643	166.769	1.00319	0.205809	4.87436	1.09e-06	1.53e-05	AAEL013795	spliceosome associated protein [Source:VB Community Annotation]
LOC110674343	138.986	1.87408	0.384971	4.8681	1.13e-06	1.58e-05	AAEL022520
LOC5572877	45.4765	-2.13009	0.437766	-4.86581	1.14e-06	1.59e-05	AAEL010109
LOC5564749	91.3256	-1.6933	0.348121	-4.86412	1.15e-06	1.6e-05	AAEL014609	cytochrome P450 [Source:VB Community Annotation]	CYP9J26
LOC110680427	302.714	-1.14577	0.235569	-4.86384	1.15e-06	1.61e-05	AAEL021944
LOC110680437	16.1839	-4.23632	0.871075	-4.86332	1.15e-06	1.61e-05	AAEL026378
LOC5569344	176.095	-0.969119	0.199298	-4.86266	1.16e-06	1.61e-05	AAEL007544	serine/threonine-protein kinase chk2 (cds1) [Source:VB Community Annotation]
LOC110681036	11.0791	-6.23682	1.28298	-4.86122	1.17e-06	1.62e-05	AAEL022290
LOC23687983	1199.36	-2.82383	0.580894	-4.86117	1.17e-06	1.62e-05	AAEL017563
LOC5574880	101.669	-1.34048	0.275795	-4.86043	1.17e-06	1.63e-05	AAEL022271
LOC5570996	1601.57	-1.45255	0.298942	-4.85896	1.18e-06	1.64e-05	AAEL008723
LOC5578194	1049.19	1.20167	0.247403	4.85715	1.19e-06	1.65e-05	AAEL003476	calpain-c [Source:VB Community Annotation]
LOC5567183	6.70318	-6.4761	1.33396	-4.85481	1.21e-06	1.67e-05	AAEL000876	Fatty acyl-CoA reductase [Source:UniProtKB/TrEMBL;Acc:Q17MZ1]
LOC5578837	1400.76	-1.61323	0.332383	-4.85354	1.21e-06	1.68e-05	AAEL013877	Glucosamine-6-phosphate isomerase (EC 3.5.99.6)(Glucosamine-6-phosphate deaminase)(GlcN6P deaminase)(GNPDA) [Source:VB Community Annotation]
LOC5577434	454.073	-1.38232	0.284839	-4.85298	1.22e-06	1.68e-05	AAEL013184
LOC5569456	82.395	-1.11083	0.229079	-4.8491	1.24e-06	1.71e-05	AAEL007641
LOC5574118	16.5762	3.65896	0.755011	4.84623	1.26e-06	1.74e-05	AAEL020579
LOC5574207	135.12	-1.92415	0.397115	-4.84533	1.26e-06	1.74e-05	AAEL021698
LOC5570680	18.3668	-3.16574	0.653366	-4.84527	1.26e-06	1.74e-05	AAEL008488	cysteine-rich secretory protein-2, putative [Source:VB Community Annotation]
LOC5568278	138.918	0.936713	0.193372	4.8441	1.27e-06	1.75e-05	AAEL025796
LOC5568181	186.866	-1.00019	0.206517	-4.84316	1.28e-06	1.76e-05	AAEL023253
LOC5569644	67.0884	1.35743	0.28032	4.84244	1.28e-06	1.76e-05	AAEL007792
LOC110674246	28.302	-2.8132	0.581017	-4.84185	1.29e-06	1.76e-05	AAEL022117
LOC5563734	67.734	-2.49442	0.515344	-4.8403	1.3e-06	1.78e-05	AAEL019761
LOC23687505	357.417	1.21917	0.251937	4.83917	1.3e-06	1.78e-05	AAEL017085	glutathione transferase [Source:VB Community Annotation]	GSTO1
LOC5578710	297.171	-1.26525	0.261465	-4.83909	1.3e-06	1.78e-05	AAEL013823	calcium/calmodulin dependent protein kinase ii [Source:VB Community Annotation]
LOC5569182	992.509	-0.907416	0.187527	-4.83886	1.31e-06	1.78e-05	AAEL007443	serine/threonine protein kinase [Source:VB Community Annotation]
LOC5565978	72.2504	1.15527	0.238948	4.83482	1.33e-06	1.82e-05	AAEL027400
LOC5565397	97.7583	-2.66614	0.551565	-4.83376	1.34e-06	1.83e-05	AAEL019993
LOC5568942	269.732	1.28893	0.266774	4.83153	1.35e-06	1.85e-05	AAEL007226	nidogen [Source:VB Community Annotation]
LOC5567089	780.124	-0.78155	0.161773	-4.83114	1.36e-06	1.85e-05	AAEL020530
LOC110681474	58.2527	1.25824	0.26054	4.82935	1.37e-06	1.86e-05	AAEL021152
LOC5569887	5145.57	-1.86628	0.386586	-4.8276	1.38e-06	1.88e-05	AAEL024147
LOC5576596	337.943	-1.07827	0.223412	-4.82639	1.39e-06	1.89e-05	AAEL002935
LOC110680661	756.658	0.862182	0.178648	4.82615	1.39e-06	1.89e-05	AAEL027562
LOC5569507	275.871	-1.16806	0.242053	-4.82565	1.4e-06	1.89e-05	AAEL007684	tektin, putative [Source:VB Community Annotation]
LOC5569525	85.2158	-1.40159	0.290476	-4.82516	1.4e-06	1.89e-05	AAEL024480
LOC5579000	1308.77	-0.586833	0.12164	-4.82436	1.4e-06	1.9e-05	AAEL003789	exportin, putative [Source:VB Community Annotation]
LOC23687471	64.9798	2.31382	0.479649	4.82399	1.41e-06	1.9e-05	AAEL017051
LOC110676609	1229.93	-3.59623	0.745496	-4.82394	1.41e-06	1.9e-05	AAEL026898
LOC5575142	817.452	-1.2217	0.253412	-4.82101	1.43e-06	1.93e-05	AAEL020382	Acetyl-coenzyme A synthetase [Source:UniProtKB/TrEMBL;Acc:Q16EU8]
LOC110680199	453.055	0.837227	0.173779	4.81776	1.45e-06	1.96e-05	AAEL024807
LOC5577033	223.818	-1.34356	0.279007	-4.81549	1.47e-06	1.98e-05	AAEL012947
LOC23687788	2095.52	0.592187	0.122991	4.81489	1.47e-06	1.98e-05	AAEL017368
LOC5574764	28.4492	-2.20671	0.458373	-4.81421	1.48e-06	1.99e-05	AAEL011408	C-Type Lectin (CTL21) [Source:VB Community Annotation]	CTL21
LOC5567696	687.851	1.49735	0.311259	4.81062	1.5e-06	2.02e-05	AAEL006269
LOC5564718	61.5546	-1.68985	0.351793	-4.80355	1.56e-06	2.09e-05	AAEL021789
LOC5576114	61.895	-1.83016	0.381198	-4.80107	1.58e-06	2.12e-05	AAEL002792	dynein light chain [Source:VB Community Annotation]
LOC5576734	5428.18	-1.45768	0.303645	-4.8006	1.58e-06	2.12e-05	AAEL020340
LOC5567881	263.894	-1.00392	0.209161	-4.79976	1.59e-06	2.13e-05	AAEL006340
LOC5572198	961.759	-1.34064	0.279596	-4.79493	1.63e-06	2.17e-05	AAEL009615	ultraviolet wavelength sensitive opsin [Source:VB Community Annotation]	GPROP8
LOC5571803	7.05871	-6.54537	1.36629	-4.79063	1.66e-06	2.22e-05	AAEL009330	carbonic anhydrase II, putative [Source:VB Community Annotation]
LOC5564460	464.164	-1.16986	0.244271	-4.78917	1.67e-06	2.23e-05	AAEL024632
LOC5571961	87.4585	-1.06144	0.22182	-4.78512	1.71e-06	2.28e-05	AAEL012369
LOC110673993	1130.9	-0.711655	0.148734	-4.78475	1.71e-06	2.28e-05	AAEL026310
LOC5569634	17.0407	-2.83979	0.593544	-4.78446	1.71e-06	2.28e-05	AAEL007784
LOC110678505	11.9907	-5.43526	1.13663	-4.7819	1.74e-06	2.31e-05	AAEL021766
LOC5579805	71.5501	-1.19022	0.248964	-4.78066	1.75e-06	2.32e-05	AAEL003951
LOC5573954	912.365	-0.599073	0.125347	-4.77932	1.76e-06	2.33e-05	AAEL002240	signal transducing adapter molecule (stam) [Source:VB Community Annotation]
LOC23687938	241.27	-1.00011	0.20927	-4.77902	1.76e-06	2.34e-05	AAEL013633	ubiquitin-conjugating enzyme h [Source:VB Community Annotation]
LOC5568462	228.45	-1.02467	0.214551	-4.77589	1.79e-06	2.37e-05	AAEL019879
LOC5578139	346.495	-0.733765	0.153717	-4.77347	1.81e-06	2.4e-05	AAEL013525	Timp-3, putative [Source:VB Community Annotation]
LOC5564192	45.9078	-1.65691	0.347351	-4.77012	1.84e-06	2.43e-05	AAEL014343
LOC5571824	31.4411	-2.41131	0.50555	-4.76968	1.85e-06	2.44e-05	AAEL001694
LOC5567233	352.736	-1.47921	0.310308	-4.76691	1.87e-06	2.47e-05	AAEL000878	cuticle protein, putative [Source:VB Community Annotation]
LOC5564482	2260.26	1.12949	0.237022	4.76535	1.89e-06	2.49e-05	AAEL014486
LOC110675288	202.331	0.923679	0.193853	4.76485	1.89e-06	2.49e-05	AAEL023028	Density-regulated protein [Source:UniProtKB/TrEMBL;Acc:A0A0P6IY07]
LOC5571528	20.2209	-2.6916	0.564889	-4.76482	1.89e-06	2.49e-05	AAEL009126	cytochrome P450 [Source:VB Community Annotation]	CYP6N6
LOC5563575	632.436	-1.42498	0.299372	-4.75989	1.94e-06	2.55e-05	AAEL000080	phosphoenolpyruvate carboxykinase [Source:VB Community Annotation]
LOC5565410	272.845	1.32302	0.278065	4.75795	1.96e-06	2.57e-05	AAEL014852
LOC110680948	112.303	1.12412	0.236692	4.74928	2.04e-06	2.68e-05	AAEL021792
LOC110678447	72.5395	1.28184	0.27013	4.74527	2.08e-06	2.73e-05	AAEL025333
LOC110675975	29.9667	-2.21307	0.466478	-4.7442	2.09e-06	2.74e-05	AAEL023658
LOC5568610	44.3483	1.39537	0.294289	4.7415	2.12e-06	2.78e-05	AAEL028171
LOC5571738	727.625	-0.82517	0.174044	-4.74116	2.12e-06	2.78e-05	AAEL009259
LOC5567339	263.597	-0.78391	0.165453	-4.73796	2.16e-06	2.82e-05	AAEL006012	factor for adipocyte differentiation [Source:VB Community Annotation]
LOC110679567	87.3398	-1.32234	0.279216	-4.73591	2.18e-06	2.85e-05	AAEL023613
LOC5564923	2316.44	-1.24353	0.262591	-4.73562	2.18e-06	2.85e-05	AAEL004496	glutamate transporter [Source:VB Community Annotation]
LOC110678091	23.5337	-2.09351	0.442094	-4.73544	2.19e-06	2.85e-05	AAEL026784
LOC5568391	89.7731	-1.57278	0.332219	-4.73415	2.2e-06	2.86e-05	AAEL022398
LOC5576961	114.965	-1.12968	0.238713	-4.73237	2.22e-06	2.89e-05	AAEL003087
LOC5576492	73.7113	-1.44755	0.305921	-4.73176	2.23e-06	2.89e-05	AAEL002919
LOC5568041	143.987	-2.08685	0.441656	-4.72506	2.3e-06	2.99e-05	AAEL006487	sodium/solute symporter [Source:VB Community Annotation]
LOC5574467	49.395	-2.63801	0.55832	-4.72491	2.3e-06	2.99e-05	AAEL002373	juvenile hormone-inducible protein, putative [Source:VB Community Annotation]
LOC5579419	787.461	-1.25059	0.264905	-4.7209	2.35e-06	3.04e-05	AAEL026018
LOC5570072	259.155	-1.28032	0.27124	-4.72024	2.36e-06	3.05e-05	AAEL001340
LOC110677635	188.612	1.19764	0.253809	4.71865	2.37e-06	3.07e-05	AAEL023743
LOC110680553	1769.12	-0.885361	0.187651	-4.71813	2.38e-06	3.08e-05	AAEL022056
LOC5579337	507.664	-1.06248	0.225224	-4.71746	2.39e-06	3.09e-05	AAEL019957
LOC5572540	1636.47	1.06416	0.225588	4.71727	2.39e-06	3.09e-05	AAEL009876
LOC5564321	52.3943	1.358	0.287985	4.71551	2.41e-06	3.11e-05	AAEL000575	apyrase, putative [Source:VB Community Annotation]
LOC110680416	83.1558	-1.3477	0.285866	-4.71443	2.42e-06	3.12e-05	AAEL027561
LOC5579990	1128.69	0.604385	0.128397	4.70715	2.51e-06	3.23e-05	AAEL001742
LOC5579140	1855.48	0.557296	0.118439	4.70535	2.53e-06	3.26e-05	AAEL019512
LOC5575182	3725.76	-1.18377	0.251604	-4.70491	2.54e-06	3.26e-05	AAEL019826
LOC5572783	78.5855	1.58429	0.336734	4.70486	2.54e-06	3.26e-05	AAEL010049
LOC5566760	388.683	1.44283	0.306712	4.70417	2.55e-06	3.27e-05	AAEL005618	chitin synthase [Source:VB Community Annotation]
LOC5565372	276.618	0.932654	0.198277	4.7038	2.55e-06	3.27e-05	AAEL004755	3-2-trans-enoyl-CoA isomerase, putative [Source:VB Community Annotation]
LOC110675360	73.3589	1.40209	0.298096	4.70347	2.56e-06	3.27e-05	AAEL025860
LOC5567588	400.371	0.749443	0.15934	4.70342	2.56e-06	3.27e-05	AAEL006188
LOC5571269	15.1152	-2.78858	0.593164	-4.7012	2.59e-06	3.31e-05	AAEL001571
LOC5576673	58.1343	1.88658	0.401326	4.70088	2.59e-06	3.31e-05	AAEL026023
LOC110675699	21.2214	3.32407	0.707224	4.70017	2.6e-06	3.32e-05	AAEL024482
LOC5569200	16.5358	-2.91505	0.621067	-4.69362	2.68e-06	3.42e-05	AAEL007456	zinc finger protein, putative [Source:VB Community Annotation]
LOC5566253	62.8946	1.19986	0.255729	4.69192	2.71e-06	3.45e-05	AAEL005287
LOC5570205	2891.67	0.869151	0.185421	4.68745	2.77e-06	3.52e-05	AAEL008167	aspartate ammonia lyase [Source:VB Community Annotation]
LOC5565905	899.752	1.92018	0.409727	4.68649	2.78e-06	3.54e-05	AAEL000683
LOC5565992	207.568	1.02334	0.218456	4.68441	2.81e-06	3.57e-05	AAEL015038	palmitoyl-protein thioesterase [Source:VB Community Annotation]
LOC5563757	1159.28	-1.10716	0.23641	-4.6832	2.82e-06	3.59e-05	AAEL014258	monocarboxylate transporter [Source:VB Community Annotation]
LOC5579108	862.174	-1.19596	0.25548	-4.68121	2.85e-06	3.62e-05	AAEL003844	galectin [Source:VB Community Annotation]	GALE5
LOC110676506	1356.11	-1.58927	0.33951	-4.68107	2.85e-06	3.62e-05	AAEL024545
LOC5579041	846.484	0.89171	0.190536	4.68	2.87e-06	3.63e-05	AAEL013989	protein translocation complex beta subunit, putative [Source:VB Community Annotation]
LOC5580206	680.426	-1.03987	0.222198	-4.67994	2.87e-06	3.63e-05	AAEL002543
LOC5571010	3616.01	-5.32347	1.13754	-4.67982	2.87e-06	3.63e-05	AAEL008746
LOC5563771	2294.35	0.511268	0.109252	4.67971	2.87e-06	3.63e-05	AAEL019480
LOC5577490	834.993	0.756747	0.161725	4.67922	2.88e-06	3.64e-05	AAEL013233	PIWI [Source:VB Community Annotation]	PIWI5
LOC5568213	440.422	-0.79609	0.170198	-4.67742	2.91e-06	3.66e-05	AAEL019739
LOC5579191	25.6917	-2.464	0.526838	-4.67697	2.91e-06	3.67e-05	AAEL003894	Gram-Negative Binding Protein (GNBP) or Beta-1 3-Glucan Binding Protein (BGBP). [Source:VB Community Annotation]	GNBPB5
LOC5564628	65.1565	-1.27332	0.2723	-4.67617	2.92e-06	3.68e-05	AAEL014550	homeobox protein pknox1 [Source:VB Community Annotation]
LOC5565767	115.022	-1.07545	0.230023	-4.67541	2.93e-06	3.69e-05	AAEL004976
LOC110676630	67.5882	1.17921	0.252273	4.67433	2.95e-06	3.71e-05	AAEL023206
LOC5574590	470.922	0.933492	0.199733	4.6737	2.96e-06	3.72e-05	AAEL002416	short-chain dehydrogenase [Source:VB Community Annotation]
LOC5566566	549.498	-1.20857	0.258708	-4.67154	2.99e-06	3.75e-05	AAEL005481	alpha-glucosidase [Source:VB Community Annotation]
LOC5574644	920.582	1.07478	0.230138	4.67016	3.01e-06	3.77e-05	AAEL011281	cytochrome B561 [Source:VB Community Annotation]
LOC5573828	96.4327	-1.12163	0.240314	-4.66736	3.05e-06	3.82e-05	AAEL010760
LOC5575337	158.035	1.28115	0.274502	4.66719	3.05e-06	3.82e-05	AAEL002599
LOC23687690	69.6151	-2.26593	0.48552	-4.66702	3.06e-06	3.82e-05	AAEL017270
LOC110677273	29.7774	-1.81606	0.38935	-4.66433	3.1e-06	3.87e-05	AAEL026228
LOC5572655	181.73	-2.49324	0.534797	-4.66203	3.13e-06	3.91e-05	AAEL001837	Lipase [Source:UniProtKB/TrEMBL;Acc:A0A1S4EZX5]
LOC5576016	183.534	-0.968389	0.207806	-4.66006	3.16e-06	3.94e-05	AAEL012249
LOC5576071	155.437	-1.20203	0.257981	-4.65939	3.17e-06	3.95e-05	AAEL012298	sterol desaturase [Source:VB Community Annotation]
LOC5564077	91.206	-1.82533	0.39184	-4.65836	3.19e-06	3.97e-05	AAEL014297	xenotropic and polytropic murine leukemia virus receptor xpr1 [Source:VB Community Annotation]
LOC5568881	1749.58	0.697008	0.149646	4.65771	3.2e-06	3.98e-05	AAEL007173
LOC5574850	83.1125	1.60029	0.343652	4.65673	3.21e-06	3.99e-05	AAEL011463	cytochrome P450 [Source:VB Community Annotation]
LOC5569083	1270.36	-1.06919	0.229664	-4.65547	3.23e-06	4.01e-05	AAEL001209	sodium-dependent phosphate transporter [Source:VB Community Annotation]
LOC5572031	33.1909	1.74431	0.374687	4.65538	3.23e-06	4.01e-05	AAEL000223	alpha-glucosidase [Source:VB Community Annotation]
LOC5566155	392.793	1.2859	0.276242	4.65498	3.24e-06	4.02e-05	AAEL027594
LOC5577601	135.803	-2.45505	0.527621	-4.65306	3.27e-06	4.05e-05	AAEL003235
LOC5565366	1401.09	-0.702596	0.151016	-4.65245	3.28e-06	4.06e-05	AAEL004739	acyl-coa dehydrogenase [Source:VB Community Annotation]
LOC5569616	352.303	1.60407	0.345451	4.64342	3.43e-06	4.24e-05	AAEL014832	Putative sorbin and sh3 domain-containing protein [Source:UniProtKB/TrEMBL;Acc:A0A0N8ERZ4]
LOC110677933	260.965	0.938637	0.202167	4.64287	3.44e-06	4.25e-05	AAEL027357
LOC5575639	131.746	-0.966773	0.208274	-4.64183	3.45e-06	4.26e-05	AAEL026043
LOC5571059	639.672	-0.956067	0.205972	-4.64172	3.46e-06	4.26e-05	AAEL008793
LOC5564138	3459.57	-1.21178	0.261087	-4.64129	3.46e-06	4.27e-05	AAEL019812
LOC5567182	14.8537	-2.75893	0.594839	-4.6381	3.52e-06	4.33e-05	AAEL000910	Fatty acyl-CoA reductase [Source:UniProtKB/TrEMBL;Acc:Q17MZ2]
LOC110678390	10.0735	-6.07805	1.3106	-4.63762	3.52e-06	4.34e-05	AAEL020280
LOC5575348	163.293	2.00513	0.432397	4.63725	3.53e-06	4.34e-05	AAEL002598	odorant binding protein OBP15 [Source:VB Community Annotation]	OBP15
LOC5573232	158.723	0.889193	0.191811	4.63577	3.56e-06	4.37e-05	AAEL010323
LOC5569106	215.628	-1.4513	0.313068	-4.63574	3.56e-06	4.37e-05	AAEL007372	GPCR GABA B Family [Source:VB Community Annotation]	GPRGBB1
LOC5574236	421.294	-0.996807	0.215033	-4.63561	3.56e-06	4.37e-05	AAEL011004
LOC5579118	954.371	-1.37934	0.297875	-4.6306	3.65e-06	4.47e-05	AAEL019627
LOC5577228	997.507	-0.584433	0.126279	-4.6281	3.69e-06	4.52e-05	AAEL003143	inositol polyphosphate 5-phosphatase [Source:VB Community Annotation]
LOC5570400	10.4139	-5.21937	1.12838	-4.62553	3.74e-06	4.57e-05	AAEL019786	NPYLR7B [Source:UniProtKB/TrEMBL;Acc:U5N1H5]
LOC110676388	12.0694	-2.97708	0.643742	-4.62465	3.75e-06	4.59e-05	AAEL019850
LOC5566178	22.2863	-1.92845	0.417	-4.62459	3.75e-06	4.59e-05	AAEL015079
LOC5566538	170.952	-1.01322	0.219184	-4.6227	3.79e-06	4.62e-05	AAEL018342
LOC5569072	715.997	-1.22754	0.26575	-4.61913	3.85e-06	4.7e-05	AAEL001198	sodium/solute symporter [Source:VB Community Annotation]
LOC5563951	1172.57	-0.518724	0.112301	-4.61906	3.85e-06	4.7e-05	AAEL004041	flotillin-2 [Source:VB Community Annotation]
LOC5576179	91.1608	-0.97931	0.212024	-4.61887	3.86e-06	4.7e-05	AAEL012371
LOC5578475	38.5159	1.5939	0.345185	4.61753	3.88e-06	4.72e-05	AAEL000508	fibrinogen and fibronectin [Source:VB Community Annotation]
LOC5575167	68.8597	-1.7227	0.373131	-4.61689	3.9e-06	4.73e-05	AAEL000359	ferritin-precursor, putative [Source:VB Community Annotation]
LOC5578159	3672.33	-1.29208	0.280118	-4.61265	3.98e-06	4.83e-05	AAEL013535	phosrestin ii (arrestin a) (arrestin 1) [Source:VB Community Annotation]
LOC110675413	5.96977	-6.30477	1.36706	-4.61191	3.99e-06	4.84e-05	AAEL025767
LOC5564309	108.458	-2.03713	0.441842	-4.61054	4.02e-06	4.87e-05	AAEL000580
LOC5569268	129.36	-0.854897	0.185444	-4.61001	4.03e-06	4.88e-05	AAEL007512	ATP-dependent RNA and DNA helicase [Source:VB Community Annotation]
LOC5571006	12234.6	0.632349	0.137224	4.60817	4.06e-06	4.92e-05	AAEL008738	DEAD box ATP-dependent RNA helicase [Source:VB Community Annotation]
LOC5577782	13.2976	-3.30941	0.71873	-4.60453	4.13e-06	5e-05	AAEL013371
LOC5569651	194.734	-1.05802	0.229821	-4.60365	4.15e-06	5.01e-05	AAEL007813
LOC5571311	213.691	-0.829221	0.180124	-4.60361	4.15e-06	5.01e-05	AAEL008944
LOC5569759	157.047	-1.98916	0.432237	-4.60201	4.18e-06	5.05e-05	AAEL007911	dynein heavy chain [Source:VB Community Annotation]
LOC110678314	11.4699	-5.39045	1.17143	-4.60159	4.19e-06	5.05e-05	AAEL021842
LOC5569183	1911.3	-0.772975	0.167988	-4.60136	4.2e-06	5.06e-05	AAEL007439	myosin light chain 1, [Source:VB Community Annotation]
LOC110675993	278.414	-1.07764	0.234253	-4.60035	4.22e-06	5.08e-05	AAEL024527
LOC5569889	114.108	-0.883648	0.192119	-4.59949	4.24e-06	5.09e-05	AAEL027567
LOC5566542	475.006	0.838557	0.182407	4.59718	4.28e-06	5.15e-05	AAEL005477	amidase [Source:VB Community Annotation]
LOC5568488	683.897	-0.998047	0.21722	-4.59465	4.33e-06	5.2e-05	AAEL006899	DNA-J/hsp40 [Source:VB Community Annotation]
LOC5565544	29421.7	-0.703735	0.153219	-4.59299	4.37e-06	5.24e-05	AAEL004855	ADP,ATP carrier protein [Source:VB Community Annotation]
LOC110677668	69.7779	1.26887	0.276276	4.59275	4.37e-06	5.24e-05	AAEL020234
LOC110677670	69.7779	1.26887	0.276276	4.59275	4.37e-06	5.24e-05	AAEL026520
LOC5572994	187.66	0.856589	0.186547	4.59181	4.39e-06	5.26e-05	AAEL001937	selenium-binding protein [Source:VB Community Annotation]
LOC5565925	592.37	-2.06881	0.450561	-4.59162	4.4e-06	5.26e-05	AAEL005060	Clip-Domain Serine Protease family B. [Source:VB Community Annotation]	CLIPB44
LOC5565536	825.206	-0.605567	0.131975	-4.5885	4.46e-06	5.33e-05	AAEL004852
LOC5574680	76.2517	-1.33626	0.291321	-4.58691	4.5e-06	5.37e-05	AAEL011318	guanylate cyclase [Source:VB Community Annotation]
LOC5572931	7115.67	-1.32602	0.289296	-4.58362	4.57e-06	5.45e-05	AAEL010145	sodium/potassium-dependent ATPase beta-2 subunit [Source:VB Community Annotation]
LOC5569095	753.474	0.927566	0.202371	4.58348	4.57e-06	5.45e-05	AAEL007364	7,8-dihydro-8-oxoguanine-triphosphatase, putative [Source:UniProtKB/TrEMBL;Acc:Q172L0]
LOC5572503	151.732	0.92509	0.201894	4.58205	4.6e-06	5.48e-05	AAEL022990
LOC5578234	2191.01	0.677274	0.148249	4.56848	4.91e-06	5.85e-05	AAEL013571	synaptobrevin [Source:VB Community Annotation]
LOC5576290	819.033	-1.56105	0.341921	-4.56552	4.98e-06	5.93e-05	AAEL024953
LOC110675382	150.727	-2.53591	0.556164	-4.55965	5.12e-06	6.09e-05	AAEL027663
LOC5572025	69.6175	-1.40197	0.307545	-4.55859	5.15e-06	6.11e-05	AAEL000247
LOC5573425	2204.24	-2.66768	0.585329	-4.55758	5.17e-06	6.14e-05	AAEL019863
LOC110679370	134.396	-1.01453	0.222721	-4.55516	5.23e-06	6.2e-05	AAEL027185
LOC5576789	23.5402	-2.28554	0.501772	-4.55493	5.24e-06	6.2e-05	AAEL012772	cytochrome P450 [Source:VB Community Annotation]	CYP325G3
LOC5565721	937.842	-1.05444	0.231498	-4.55485	5.24e-06	6.2e-05	AAEL004957
LOC5574161	20795.8	-1.15807	0.254268	-4.55453	5.25e-06	6.21e-05	AAEL010975	paramyosin, long form [Source:VB Community Annotation]
LOC5577651	300.287	-1.77442	0.389663	-4.55373	5.27e-06	6.23e-05	AAEL019558
LOC110676646	6.70828	-6.47179	1.42308	-4.54773	5.42e-06	6.4e-05	AAEL027605
LOC5577908	3370.2	-1.33787	0.294237	-4.54692	5.44e-06	6.42e-05	AAEL003347	CRAL/TRIO domain-containing protein [Source:VB Community Annotation]
LOC110675733	415.686	1.28199	0.281961	4.54668	5.45e-06	6.42e-05	AAEL024325
LOC110678426	134.172	-0.827642	0.182077	-4.54556	5.48e-06	6.45e-05	AAEL024090
LOC23687669	8.86476	-5.89619	1.29991	-4.53585	5.74e-06	6.75e-05	AAEL017249	Serine Protease Inhibitor (serpin) homologue - unlikely to be inhibitory. [Source:VB Community Annotation]	SRPN24
LOC5573766	96.7554	1.01893	0.224816	4.53227	5.84e-06	6.86e-05	AAEL026994
LOC5564117	1182.22	0.990825	0.218777	4.52892	5.93e-06	6.96e-05	AAEL019408	2-Cys thioredoxin peroxidase [Source:UniProtKB/TrEMBL;Acc:Q8WSF6]
LOC110677659	90.5096	-1.04885	0.231593	-4.52886	5.93e-06	6.96e-05	AAEL020156
LOC110675977	64.3285	-1.62649	0.359143	-4.52881	5.93e-06	6.96e-05	AAEL023581
LOC5568071	797.987	-0.585272	0.129252	-4.52813	5.95e-06	6.98e-05	AAEL025578
LOC5573016	10875.7	-1.16735	0.258042	-4.52386	6.07e-06	7.11e-05	AAEL001946	four and a half lim domains [Source:VB Community Annotation]
LOC5571232	40.0254	-1.60349	0.354541	-4.52272	6.11e-06	7.14e-05	AAEL024784
LOC5578050	549.131	1.42097	0.314279	4.52135	6.14e-06	7.19e-05	AAEL013484
LOC110674709	399.275	-1.03255	0.228387	-4.52106	6.15e-06	7.19e-05	AAEL022538	Putative bisphosphate 3'-nucleotidase bpnt1/inositol polyphosphate 1-phosphatase [Source:UniProtKB/TrEMBL;Acc:A0A0P6IYC3]
LOC5567018	68.1521	-1.97905	0.437866	-4.51975	6.19e-06	7.23e-05	AAEL018352
LOC5576313	361.674	1.25529	0.277781	4.51899	6.21e-06	7.25e-05	AAEL012458
LOC5572250	97.4848	-1.40992	0.312163	-4.51661	6.28e-06	7.32e-05	AAEL009679	secretory Phospholipase A2, putative [Source:VB Community Annotation]
LOC5569925	1499.03	-1.41708	0.314124	-4.51122	6.45e-06	7.51e-05	AAEL027654
LOC5578840	78.5795	-1.40906	0.312362	-4.51098	6.45e-06	7.51e-05	AAEL019588
LOC110678907	23.5132	-2.28359	0.506263	-4.51068	6.46e-06	7.51e-05	AAEL026102
LOC5570106	28.0086	-1.78177	0.395121	-4.50943	6.5e-06	7.55e-05	AAEL008090	glutamate receptor, ionotropic, n-methyl d-aspartate epsilon (nmda epsilon) [Source:VB Community Annotation]
LOC5564132	688.388	0.592503	0.13148	4.50641	6.59e-06	7.66e-05	AAEL018310
LOC5575304	404.108	0.84939	0.188731	4.50053	6.78e-06	7.86e-05	AAEL019566
LOC5569640	35.7294	-2.71879	0.604432	-4.49809	6.86e-06	7.95e-05	AAEL007793	alkyldihydroxyacetonephosphate synthase [Source:VB Community Annotation]
LOC5569520	1568.62	0.510277	0.113448	4.49788	6.86e-06	7.95e-05	AAEL007707	malate dehydrogenase [Source:VB Community Annotation]
LOC110678898	1093.73	1.18272	0.263009	4.49686	6.9e-06	7.98e-05	AAEL021853
LOC5570215	56.2309	-1.1935	0.265468	-4.49582	6.93e-06	8.01e-05	AAEL008156
LOC5569474	62.5862	-4.64623	1.03349	-4.49569	6.93e-06	8.01e-05	AAEL007653	allantoinase [Source:VB Community Annotation]
LOC5570557	116.926	-1.5753	0.350448	-4.4951	6.95e-06	8.03e-05	AAEL008365
LOC5565427	32.4139	-2.72915	0.60757	-4.49192	7.06e-06	8.14e-05	AAEL000633	Toll-like receptor [Source:VB Community Annotation]	TOLL8
LOC5564518	11329.2	1.06005	0.235993	4.49184	7.06e-06	8.14e-05	AAEL019716
LOC5565680	1915.97	0.502209	0.11181	4.49164	7.07e-06	8.14e-05	AAEL004936
LOC5576843	325.025	-1.10711	0.246533	-4.49071	7.1e-06	8.17e-05	AAEL012823	n-acetylgalactosaminyltransferase [Source:VB Community Annotation]
LOC5572254	2091.05	-0.803348	0.178892	-4.49068	7.1e-06	8.17e-05	AAEL009691	carboxylase:pyruvate/acetyl-coa/propionyl-coa [Source:VB Community Annotation]
LOC5573470	239.836	-1.35174	0.301238	-4.48727	7.21e-06	8.29e-05	AAEL010511
LOC5564066	1494.8	-0.560784	0.125025	-4.48536	7.28e-06	8.36e-05	AAEL026169
LOC5567138	201.677	-0.737402	0.164605	-4.47983	7.47e-06	8.57e-05	AAEL019757
LOC110681383	737.565	0.885957	0.197849	4.47796	7.54e-06	8.64e-05	AAEL025151
LOC5574747	5606.99	0.897476	0.200483	4.47657	7.59e-06	8.69e-05	AAEL019990
LOC5577132	1350.35	-0.567893	0.126872	-4.4761	7.6e-06	8.7e-05	AAEL023019	RBR-type E3 ubiquitin transferase [Source:UniProtKB/TrEMBL;Acc:A0A0P6J528]
LOC110675345	14.1047	-2.54619	0.569001	-4.47485	7.65e-06	8.75e-05	AAEL027165
LOC5576746	5000.82	1.45831	0.325975	4.4737	7.69e-06	8.79e-05	AAEL011142
LOC5563760	596.536	-1.1233	0.251106	-4.47342	7.7e-06	8.79e-05	AAEL014253
LOC5569400	110.341	-1.33375	0.298182	-4.47294	7.72e-06	8.81e-05	AAEL007604	odorant-binding protein 56a, putative [Source:VB Community Annotation]
LOC5566116	1530.01	-0.990744	0.221534	-4.47221	7.74e-06	8.83e-05	AAEL005174
LOC5566123	1620.63	0.633704	0.141717	4.47161	7.76e-06	8.85e-05	AAEL005187	laminin gamma 1 chain [Source:VB Community Annotation]
LOC5569768	1256.17	1.65989	0.371245	4.47113	7.78e-06	8.86e-05	AAEL007897	spaetzle-like cytokine [Source:VB Community Annotation]	SPZ4
LOC5569901	737.319	0.885629	0.198141	4.46969	7.83e-06	8.91e-05	AAEL007987	SEC63 protein, putative [Source:VB Community Annotation]	sec63
LOC5570142	1536.89	-0.690498	0.154501	-4.46922	7.85e-06	8.92e-05	AAEL019814
LOC110674174	148.906	-1.13201	0.253294	-4.46917	7.85e-06	8.92e-05	AAEL024982
LOC5570705	356.076	-0.900983	0.201606	-4.46903	7.86e-06	8.92e-05	AAEL001442	map-kinase activating death domain protein (madd)/denn/aex-3(c.elegans) [Source:VB Community Annotation]
LOC5564851	259.928	-1.22795	0.274828	-4.46807	7.89e-06	8.95e-05	AAEL000604
LOC110676897	20.6091	-2.11422	0.473687	-4.46333	8.07e-06	9.15e-05	AAEL022475
LOC5568375	27.593	2.7916	0.625616	4.46216	8.11e-06	9.19e-05	AAEL001096	lipase [Source:VB Community Annotation]
LOC5565930	400.067	0.680506	0.152666	4.45749	8.29e-06	9.38e-05	AAEL005054	pap-inositol-1,4-phosphatase [Source:VB Community Annotation]
LOC5572531	138.227	-1.40229	0.314621	-4.45707	8.31e-06	9.4e-05	AAEL009860
LOC5572215	319.958	-1.02613	0.230317	-4.4553	8.38e-06	9.47e-05	AAEL009630	high-affinity cgmp-specific 3,5-cyclic phosphodiesterase [Source:VB Community Annotation]
LOC5575655	2041.24	-1.28628	0.288753	-4.4546	8.41e-06	9.49e-05	AAEL011981	glutamate decarboxylase [Source:VB Community Annotation]
LOC5567164	992.863	0.825494	0.185411	4.45225	8.5e-06	9.59e-05	AAEL005908	rolling pebbles [Source:VB Community Annotation]
LOC5568583	3761.13	-0.808138	0.181525	-4.45194	8.51e-06	9.59e-05	AAEL001113	inorganic phosphate cotransporter, putative [Source:VB Community Annotation]
LOC5577897	324.759	1.22296	0.274736	4.4514	8.53e-06	9.61e-05	AAEL003345	argininosuccinate lyase [Source:VB Community Annotation]
LOC5575022	615.19	1.18248	0.265675	4.45086	8.55e-06	9.63e-05	AAEL011586
LOC5563576	1166.1	0.624719	0.140381	4.45016	8.58e-06	9.65e-05	AAEL019624
LOC23687700	2416.61	0.665797	0.149728	4.44671	8.72e-06	9.8e-05	AAEL017280
LOC5573035	836.448	1.26601	0.28484	4.44462	8.8e-06	9.89e-05	AAEL023745
LOC5568022	76.9571	-1.40651	0.316615	-4.44233	8.9e-06	9.99e-05	AAEL019710
LOC5563989	238.38	0.946381	0.21309	4.44122	8.94e-06	0.000100248	AAEL018308
LOC5570212	123.119	0.948738	0.213622	4.44119	8.95e-06	0.000100248	AAEL008174
LOC110675802	45.6566	1.39898	0.315063	4.4403	8.98e-06	0.000100586	AAEL023633
LOC5568622	107.158	1.43998	0.324398	4.43893	9.04e-06	0.000101153	AAEL006968
LOC5569746	39.0232	-1.7405	0.392268	-4.43701	9.12e-06	0.000101984	AAEL007875
LOC5574405	51.4993	-1.49337	0.336734	-4.43487	9.21e-06	0.000102923	AAEL011132	metalloproteinase, putative [Source:VB Community Annotation]
LOC110678164	786.759	1.92979	0.435218	4.43406	9.25e-06	0.000103192	AAEL027398
LOC110675313	17.955	-2.30064	0.518865	-4.43398	9.25e-06	0.000103192	AAEL023872
LOC5564297	790.417	0.737302	0.166512	4.42791	9.51e-06	0.000106006	AAEL000590	Defense repressor 1 [Source:VB Community Annotation]	DNR1
LOC5566785	79.8624	2.60439	0.588184	4.42785	9.52e-06	0.000106006	AAEL005641	C-Type Lectin (CTL) - galactose binding. [Source:VB Community Annotation]	CTLGA5
LOC5567105	186.396	-0.929409	0.20995	-4.42681	9.56e-06	0.000106438	AAEL005827	katanin P80 subunit [Source:VB Community Annotation]
LOC5570724	29.391	-1.60675	0.363075	-4.42539	9.63e-06	0.000107064	AAEL001452
LOC5567942	468.151	0.685606	0.154934	4.42514	9.64e-06	0.000107107	AAEL006389	cathepsin l [Source:VB Community Annotation]
LOC5578360	4531.1	-1.06341	0.240442	-4.42274	9.75e-06	0.00010822	AAEL024675
LOC5571599	226.7	-1.0843	0.245224	-4.4217	9.79e-06	0.000108662	AAEL009189	encore protein [Source:VB Community Annotation]
LOC5579180	197.175	-0.761107	0.172169	-4.4207	9.84e-06	0.000109082	AAEL003896	serine/threonine protein kinase [Source:VB Community Annotation]
LOC5574385	228.027	1.12709	0.255147	4.4174	9.99e-06	0.000110678	AAEL011090	complement component [Source:VB Community Annotation]
LOC5574825	494.821	-1.0391	0.235302	-4.41604	1.01e-05	0.000111292	AAEL022941
LOC5569581	498.529	-0.971002	0.220177	-4.4101	1.03e-05	0.000114245	AAEL007763	vacuole membrane protein [Source:VB Community Annotation]
LOC5571844	26.7314	-4.74149	1.07516	-4.41005	1.03e-05	0.000114245	AAEL001703	juvenile hormone-regulated chymotrypsin-like serine protease [Source:VB Community Annotation]	JHA15
LOC5575470	93.3082	-1.54146	0.349757	-4.40722	1.05e-05	0.000115606	AAEL011850	cytochrome P450 [Source:VB Community Annotation]	CYP315A1
LOC5577919	175.308	-0.934508	0.212043	-4.40716	1.05e-05	0.000115606	AAEL003344	metaxin [Source:VB Community Annotation]
LOC5570426	132.491	-1.05953	0.240555	-4.40451	1.06e-05	0.00011688	AAEL008325
LOC5573386	2184.59	-1.07443	0.243941	-4.40446	1.06e-05	0.00011688	AAEL002055	neuroendocrine protein 7b2 [Source:VB Community Annotation]
LOC5579144	95.851	1.75994	0.399639	4.40382	1.06e-05	0.00011714	AAEL014019	cytochrome P450 [Source:VB Community Annotation]	CYP4J16
LOC5567684	284.604	0.746256	0.169465	4.4036	1.06e-05	0.000117169	AAEL006251	Ubiquitin-fold modifier 1 Precursor [Source:VB Community Annotation]
LOC5578315	319.365	-0.957327	0.217469	-4.40213	1.07e-05	0.000117878	AAEL013637	homogentisate 1,2-dioxygenase [Source:VB Community Annotation]
LOC5573601	263.116	0.911229	0.207059	4.40082	1.08e-05	0.000118504	AAEL002116	supercoiling factor, putative [Source:VB Community Annotation]
LOC5564363	1383.57	0.498995	0.113391	4.40066	1.08e-05	0.000118504	AAEL021301
LOC5576181	161.614	-0.766856	0.17434	-4.39863	1.09e-05	0.000119532	AAEL021026
LOC5569646	23.5252	-2.25865	0.513733	-4.39655	1.1e-05	0.000120593	AAEL007794	defective proboscis extension response [Source:VB Community Annotation]
LOC5578505	12.9424	-3.1295	0.711866	-4.39619	1.1e-05	0.0001207	AAEL013703	trypsin [Source:VB Community Annotation]
LOC5568093	99.5987	0.993386	0.226008	4.39537	1.11e-05	0.000121072	AAEL006507
LOC110676092	1143.17	-1.11346	0.253478	-4.39274	1.12e-05	0.000122455	AAEL025498
LOC5568416	7802.11	1.41509	0.322168	4.39242	1.12e-05	0.000122543	AAEL006824	Cytochrome P450 [Source:UniProtKB/TrEMBL;Acc:A0A1S4FEN8]
LOC5569202	1354.31	0.706095	0.160883	4.38888	1.14e-05	0.000124463	AAEL007476	makorin [Source:VB Community Annotation]
LOC110679171	2572.58	0.429571	0.0978829	4.38862	1.14e-05	0.000124519	AAEL009684
LOC5574391	61.6799	-1.37646	0.313678	-4.38813	1.14e-05	0.000124708	AAEL011098
LOC5567789	118.488	1.05106	0.239538	4.38785	1.14e-05	0.000124776	AAEL000147	single-stranded DNA binding protein, putative [Source:VB Community Annotation]
LOC5564757	111.661	1.27716	0.291274	4.38473	1.16e-05	0.000126483	AAEL014604	cytochrome P450 [Source:VB Community Annotation]
LOC5579336	14.8305	-2.23771	0.510487	-4.38348	1.17e-05	0.000127119	AAEL006058	cytochrome P450 [Source:VB Community Annotation]	CYP325Q2
LOC110676377	22.3505	1.871	0.426907	4.38269	1.17e-05	0.000127488	AAEL027766
LOC110677787	52.8712	-1.94906	0.444805	-4.38182	1.18e-05	0.000127901	AAEL020832
LOC110676442	99.8065	1.04905	0.239423	4.38156	1.18e-05	0.000127964	AAEL022617
LOC5576286	328.986	1.07945	0.246383	4.3812	1.18e-05	0.000128079	AAEL012440	sodium-bile acid cotransporter [Source:VB Community Annotation]
LOC5576285	379.707	-0.848362	0.193654	-4.38082	1.18e-05	0.000128208	AAEL012448
LOC5574744	381.099	0.761941	0.173967	4.3798	1.19e-05	0.000128714	AAEL011386
LOC5568000	660.927	1.02704	0.234539	4.37896	1.19e-05	0.000129093	AAEL006447	GATA transcription factor (GATAb) [Source:VB Community Annotation]
LOC5564085	379.605	-0.88572	0.202273	-4.37884	1.19e-05	0.000129093	AAEL014303	neuroligin, [Source:VB Community Annotation]
LOC5572634	4774.12	-2.19024	0.500298	-4.37786	1.2e-05	0.000129581	AAEL001863	zinc carboxypeptidase [Source:VB Community Annotation]
LOC5573067	155.354	1.06469	0.243214	4.3776	1.2e-05	0.000129641	AAEL010248	fibrillarin [Source:VB Community Annotation]
LOC5566553	2103.63	-0.975796	0.222939	-4.37696	1.2e-05	0.000129879	AAEL005476
LOC5574676	223.148	0.98862	0.225873	4.37688	1.2e-05	0.000129879	AAEL011317	actin [Source:VB Community Annotation]
LOC23687890	237.837	-0.776978	0.177533	-4.37652	1.21e-05	0.000129968	AAEL024411
LOC5576240	269.734	-1.03128	0.235646	-4.37641	1.21e-05	0.000129968	AAEL002819
LOC5579333	12.6551	-2.63376	0.60219	-4.37363	1.22e-05	0.000131458	AAEL015566	odorant binding protein OBP62 [Source:VB Community Annotation]	OBP62
LOC5574682	106.324	1.47937	0.338255	4.37354	1.22e-05	0.000131458	AAEL011314	Epoxide hydrolase [Source:UniProtKB/TrEMBL;Acc:Q16QD6]
LOC5571896	475.724	-0.760188	0.173819	-4.37345	1.22e-05	0.000131458	AAEL009372
LOC5575962	84.5149	-1.48199	0.339158	-4.36963	1.24e-05	0.000133683	AAEL013277	voltage-gated sodium channel [Source:VB Community Annotation]
LOC5572435	33.0592	-1.88522	0.431543	-4.36855	1.25e-05	0.000134244	AAEL001801
LOC5569884	197.13	1.91255	0.438052	4.36602	1.27e-05	0.000135708	AAEL007969	serine protease [Source:VB Community Annotation]
LOC5580270	216.029	-0.795155	0.182133	-4.36578	1.27e-05	0.000135759	AAEL003003	glutamate-gated chloride channel [Source:VB Community Annotation]
LOC5565260	443.03	-1.76024	0.403304	-4.36455	1.27e-05	0.000136428	AAEL025650
LOC110676882	6.60206	-6.44755	1.47799	-4.36238	1.29e-05	0.000137691	AAEL024745
LOC5576800	516.863	1.48904	0.341525	4.35996	1.3e-05	0.000139118	AAEL012783	protease m1 zinc metalloprotease [Source:VB Community Annotation]
LOC5568132	23779.5	-1.295	0.297071	-4.35922	1.31e-05	0.000139489	AAEL006572	troponin C [Source:VB Community Annotation]
LOC5576013	1115.35	1.10959	0.254929	4.35253	1.35e-05	0.000143709	AAEL012245
LOC5566867	438.797	-0.847342	0.194704	-4.35194	1.35e-05	0.000143994	AAEL000832	cleavage and polyadenylation specificity factor cpsf [Source:VB Community Annotation]
LOC5578431	256.894	-1.29249	0.297036	-4.35129	1.35e-05	0.000144316	AAEL000516	juvenile hormone-inducible protein, putative [Source:VB Community Annotation]
LOC5565356	385.408	-2.65929	0.611188	-4.35102	1.36e-05	0.000144391	AAEL004776	pupal cuticle protein, putative [Source:VB Community Annotation]
LOC5569685	114.498	1.15725	0.266082	4.34921	1.37e-05	0.000145485	AAEL022771
LOC5571130	234.858	-0.859193	0.197577	-4.34864	1.37e-05	0.000145756	AAEL008826
LOC5568136	14.0517	-3.60173	0.828381	-4.34791	1.37e-05	0.000146136	AAEL006568	serine protease [Source:VB Community Annotation]
LOC5574862	354.299	0.90324	0.207805	4.34657	1.38e-05	0.000146817	AAEL011468	protein kinase C inhibitor, putative [Source:VB Community Annotation]
LOC5566044	3136.98	1.56497	0.360053	4.3465	1.38e-05	0.000146817	AAEL005130	zinc finger protein [Source:VB Community Annotation]
LOC5565793	2973.62	1.74124	0.400615	4.34642	1.38e-05	0.000146817	AAEL021691
LOC5577287	2803.55	0.804047	0.185184	4.34188	1.41e-05	0.000149776	AAEL019986
LOC5575680	111.094	1.12916	0.260175	4.34001	1.42e-05	0.000150948	AAEL018230
LOC110676008	13.2662	-2.47396	0.570076	-4.3397	1.43e-05	0.000151056	AAEL027488
LOC5575660	60.1743	-1.54215	0.355442	-4.33868	1.43e-05	0.000151561	AAEL002689
LOC5580253	281.757	-0.666904	0.153712	-4.33865	1.43e-05	0.000151561	AAEL012547	lkb1 interacting protein [Source:VB Community Annotation]
LOC5564465	30.2257	-1.94633	0.448808	-4.33666	1.45e-05	0.000152827	AAEL004836	Sialin, Sodium/sialic acid cotransporter, putative [Source:VB Community Annotation]
LOC5570086	159.318	-0.815495	0.188081	-4.33588	1.45e-05	0.000153262	AAEL001328
LOC110673979	129.124	0.849972	0.196096	4.33446	1.46e-05	0.000154036	AAEL001085
LOC5568340	129.124	0.849972	0.196096	4.33446	1.46e-05	0.000154036	AAEL001089
LOC5571448	181.789	-1.40383	0.323976	-4.33312	1.47e-05	0.000154862	AAEL009077	Alkaline phosphatase [Source:UniProtKB/TrEMBL;Acc:A0A0P6JST2]	ALP1
LOC5564849	40.81	1.67089	0.38564	4.33277	1.47e-05	0.000155001	AAEL000629	adenylate kinase 3, [Source:VB Community Annotation]
LOC5578961	634.72	-0.659616	0.15227	-4.3319	1.48e-05	0.00015549	AAEL013941	p19 protein, putative [Source:VB Community Annotation]
LOC5569158	68.55	1.90761	0.440378	4.33176	1.48e-05	0.00015549	AAEL027508
LOC5571684	537.543	1.12563	0.260038	4.3287	1.5e-05	0.000157552	AAEL009213
LOC5579518	2486.36	-2.91361	0.673258	-4.32763	1.51e-05	0.000158213	AAEL014994
LOC5566633	933.238	0.528147	0.122054	4.32716	1.51e-05	0.000158437	AAEL000752
LOC5574294	46392.3	-3.1205	0.721196	-4.32684	1.51e-05	0.000158456	AAEL011068
LOC23687733	98.812	-1.02036	0.235828	-4.32674	1.51e-05	0.000158456	AAEL019608	G-protein coupled receptor [Source:UniProtKB/TrEMBL;Acc:A0A411JKB1]
LOC5573861	98.9496	-1.05267	0.243298	-4.32666	1.51e-05	0.000158456	AAEL010772	Leucine-rich repeat-containing protein 50 homolog [Source:VB Community Annotation]
LOC5564274	52.7411	-2.38034	0.550306	-4.32549	1.52e-05	0.000159188	AAEL014372	juvenile hormone-inducible protein, putative [Source:VB Community Annotation]
LOC5574581	12.6866	-2.61401	0.604946	-4.32105	1.55e-05	0.000162309	AAEL002410
LOC5567550	148.568	-1.06727	0.247132	-4.3186	1.57e-05	0.000164003	AAEL006156
LOC5580075	5.77113	-6.25817	1.44975	-4.31671	1.58e-05	0.000165299	AAEL020560
LOC5577917	1424.93	-0.950199	0.220199	-4.31518	1.59e-05	0.000166332	AAEL003326
LOC5573079	1172.66	-1.03823	0.240658	-4.31414	1.6e-05	0.000166877	AAEL010262
LOC5574533	260.411	0.748537	0.17351	4.31408	1.6e-05	0.000166877	AAEL011201
LOC5571878	1504.85	0.717361	0.166287	4.31399	1.6e-05	0.000166877	AAEL009367	myelin proteolipid [Source:VB Community Annotation]
LOC110674086	494.035	-1.35204	0.313443	-4.31349	1.61e-05	0.000167134	AAEL026128
LOC5568574	2611.39	0.978282	0.226971	4.31016	1.63e-05	0.000169557	AAEL026410
LOC5572607	111.018	-0.961808	0.223214	-4.30891	1.64e-05	0.000170397	AAEL025433
LOC110676103	17.598	-2.23611	0.519005	-4.30845	1.64e-05	0.000170631	AAEL025985
LOC110679655	10.8665	-4.29154	0.996257	-4.30766	1.65e-05	0.000171122	AAEL026132
LOC5571900	2678.07	0.543836	0.12629	4.30626	1.66e-05	0.000172085	AAEL009377	rap1 and [Source:VB Community Annotation]
LOC5577559	294.963	0.660793	0.153462	4.30589	1.66e-05	0.000172252	AAEL020960	Carboxypeptidase A [Source:UniProtKB/TrEMBL;Acc:Q6J6D9]
LOC110677052	25.6012	-1.91579	0.445273	-4.30251	1.69e-05	0.000174782	AAEL026481
LOC5574758	10.4442	-3.34606	0.777794	-4.30198	1.69e-05	0.000175073
LOC110675610	407.299	1.74221	0.405341	4.29813	1.72e-05	0.00017802	AAEL026008
LOC5564858	648.787	0.666004	0.155004	4.2967	1.73e-05	0.000179047	AAEL004467
LOC110678806	529.975	-1.12255	0.261375	-4.29479	1.75e-05	0.000180467	AAEL020650
LOC5573679	48.0769	1.7028	0.396741	4.29197	1.77e-05	0.000182648	AAEL010677	oxidoreductase [Source:VB Community Annotation]
LOC110675097	16.3278	-2.15173	0.501491	-4.29067	1.78e-05	0.00018334	AAEL026557
LOC110676680	16.3278	-2.15173	0.501491	-4.29067	1.78e-05	0.00018334	AAEL026191
LOC110676726	16.3278	-2.15173	0.501491	-4.29067	1.78e-05	0.00018334	AAEL025142
LOC5567655	446.444	1.49203	0.347761	4.29039	1.78e-05	0.000183439	AAEL027493
LOC5568235	43.4156	-1.23992	0.28907	-4.28934	1.79e-05	0.000184181	AAEL019893
LOC5574423	1045.84	-0.761215	0.177598	-4.28617	1.82e-05	0.000186701	AAEL011140
LOC110678582	5.24961	-6.13745	1.43208	-4.2857	1.82e-05	0.000186961	AAEL025764
LOC110675956	7.71727	-5.68652	1.32694	-4.28544	1.82e-05	0.000187054	AAEL024728
LOC5569655	240.918	-0.694169	0.162004	-4.28489	1.83e-05	0.000187388	AAEL007805
LOC5576717	945.769	-2.36934	0.553001	-4.28452	1.83e-05	0.000187445	AAEL002965	osiris 18 [Source:VB Community Annotation]	Osi18
LOC110678523	154.482	-1.35445	0.316127	-4.28451	1.83e-05	0.000187445	AAEL021605
LOC5567045	173.45	1.34348	0.313615	4.28386	1.84e-05	0.000187863	AAEL005770	odorant binding protein OBP21 [Source:VB Community Annotation]	OPB21
LOC5564080	2127.05	1.99177	0.465054	4.28287	1.84e-05	0.000188572	AAEL019601
LOC5569135	6084.21	1.18246	0.276191	4.28132	1.86e-05	0.000189759	AAEL007397	Ecdysone-induced protein 75B isoform A Nuclear receptor [Source:VB Community Annotation]	E75
LOC5572966	161.111	0.779757	0.182192	4.27985	1.87e-05	0.00019088	AAEL010181	mitochondrial ribosomal protein, L51, putative [Source:VB Community Annotation]	mRpL51
LOC110678298	17.3961	-2.20455	0.515118	-4.27969	1.87e-05	0.000190885	AAEL026698
LOC5570323	247.634	-0.970014	0.226721	-4.27845	1.88e-05	0.000191821	AAEL001374	flagellar radial spoke protein [Source:VB Community Annotation]
LOC5579822	133.526	0.804374	0.18802	4.27812	1.88e-05	0.000191972	AAEL005521	prolylcarboxypeptidase [Source:VB Community Annotation]
LOC5565670	2335.17	-0.998744	0.233583	-4.27576	1.9e-05	0.000193884	AAEL014931	sarm1 [Source:VB Community Annotation]
LOC5565693	244.31	-1.33197	0.311536	-4.2755	1.91e-05	0.000193977	AAEL014216
LOC110679315	57.4678	-1.9007	0.444746	-4.27367	1.92e-05	0.000195446	AAEL028001
LOC5578921	15.3411	-2.77505	0.649557	-4.27221	1.94e-05	0.00019659	AAEL003766
LOC5564622	108.297	2.53723	0.593951	4.27179	1.94e-05	0.000196827	AAEL014544	prophenoloxidase [Source:VB Community Annotation]	PPO6
LOC5576573	159.483	0.932855	0.218436	4.27062	1.95e-05	0.000197729	AAEL023549
LOC5568727	76.8187	-1.23851	0.290032	-4.27024	1.95e-05	0.000197932	AAEL026287
LOC5578295	90.3157	-1.30219	0.305053	-4.26873	1.97e-05	0.000199134	AAEL013621
LOC5568949	165.794	-0.995289	0.233267	-4.26673	1.98e-05	0.000200789	AAEL019428
LOC5567965	8.3197	-5.80899	1.36247	-4.26358	2.01e-05	0.000203508	AAEL006418	trypsin [Source:VB Community Annotation]
LOC5579987	919.503	1.35589	0.318039	4.26326	2.01e-05	0.000203654	AAEL001740	candidate tumor suppressor protein [Source:VB Community Annotation]
LOC5574162	7.16718	-5.58918	1.31106	-4.2631	2.02e-05	0.000203669	AAEL010963	brain chitinase and chia [Source:VB Community Annotation]
LOC5563827	239.897	0.726701	0.1705	4.26218	2.02e-05	0.000204368	AAEL014161	amino acids transporter [Source:VB Community Annotation]
LOC5564638	129.498	-1.17768	0.276457	-4.25989	2.05e-05	0.000206255	AAEL004384
LOC5579817	168.538	-1.79008	0.420224	-4.25982	2.05e-05	0.000206255
LOC5568787	347.871	-1.22431	0.287438	-4.2594	2.05e-05	0.000206499	AAEL023407
LOC5566372	17.339	-2.53177	0.594694	-4.25727	2.07e-05	0.000208336	AAEL005349	Sugar transporter SWEET [Source:UniProtKB/TrEMBL;Acc:Q17A98]
LOC5579975	1588.34	-1.15362	0.271003	-4.25684	2.07e-05	0.000208591	AAEL014450	Peptidyl-glycine alpha-amidating monooxygenase [Source:UniProtKB/TrEMBL;Acc:A0A1S4G1Z5]
LOC110675722	489.197	-2.14419	0.503908	-4.25513	2.09e-05	0.000210051	AAEL023616
LOC5580265	1195.4	0.497187	0.116888	4.25352	2.1e-05	0.000211422	AAEL002988
LOC5579456	1852.99	-0.656477	0.154349	-4.25321	2.11e-05	0.00021157	AAEL019656
LOC5572759	2689.03	0.825851	0.194213	4.25229	2.12e-05	0.000212298	AAEL010017	cytochrome B5 (cytb5) [Source:VB Community Annotation]
LOC5566058	108.759	-1.5915	0.37436	-4.25127	2.13e-05	0.000213121	AAEL005148
LOC5577744	1322.9	0.714571	0.16809	4.25112	2.13e-05	0.000213121	AAEL018700
LOC5575791	8.058	-5.75117	1.35299	-4.25071	2.13e-05	0.000213366	AAEL012061
LOC110680599	111.35	-1.37271	0.323113	-4.24838	2.15e-05	0.000215452	AAEL024585
LOC5566367	19.1248	-2.05339	0.483443	-4.24743	2.16e-05	0.000216223	AAEL021480
LOC5577392	489.218	-0.619543	0.145874	-4.24711	2.17e-05	0.000216384	AAEL027664
LOC5567118	387.375	1.00916	0.237651	4.2464	2.17e-05	0.000216928	AAEL015304
LOC110677847	12.2076	-2.45761	0.578816	-4.24592	2.18e-05	0.00021724	AAEL024032
LOC5574438	762.431	-1.69378	0.398998	-4.24508	2.19e-05	0.000217915	AAEL011158	disulfide oxidoreductase [Source:VB Community Annotation]
LOC5568900	3190.13	-1.69202	0.398625	-4.24463	2.19e-05	0.000218202	AAEL007206
LOC5573728	1278.42	-1.05722	0.249103	-4.24409	2.19e-05	0.000218581	AAEL010712	low-density lipoprotein receptor (ldl) [Source:VB Community Annotation]
LOC5576331	355.299	-0.832019	0.196112	-4.24257	2.21e-05	0.000219918	AAEL022485
LOC5577378	101.558	-0.945647	0.222992	-4.24073	2.23e-05	0.000221581	AAEL000420	cathepsin o [Source:VB Community Annotation]
LOC110676307	442.856	-0.60917	0.143711	-4.23884	2.25e-05	0.000223299	AAEL025437
LOC5565938	118.044	-1.11869	0.263952	-4.23822	2.25e-05	0.000223769	AAEL005053
LOC5576154	830.195	-1.1391	0.268788	-4.2379	2.26e-05	0.000223934	AAEL012347
LOC5572238	296.682	-0.710095	0.167572	-4.23755	2.26e-05	0.000224136	AAEL009668
LOC5566222	907.977	1.32607	0.312968	4.23709	2.26e-05	0.000224447	AAEL025226
LOC5577276	97.8633	3.61821	0.854152	4.23603	2.28e-05	0.000225335	AAEL009165
LOC5572723	1325.98	0.755577	0.178375	4.2359	2.28e-05	0.000225335	AAEL009991	myosin iii [Source:VB Community Annotation]
LOC5568553	209.691	0.703173	0.166046	4.23481	2.29e-05	0.000226164	AAEL001109	Glutaredoxin [Source:UniProtKB/TrEMBL;Acc:Q17M81]
LOC5564547	329.311	0.875034	0.206631	4.23477	2.29e-05	0.000226164	AAEL004306	39S ribosomal protein L19, mitochondrial precursor [Source:UniProtKB/TrEMBL;Acc:Q17D59]	mRpL19
LOC5576472	1699.99	0.525076	0.124015	4.23397	2.3e-05	0.000226817	AAEL002886	thioredoxin reductase [Source:VB Community Annotation]
LOC5566787	172.558	-0.98034	0.231675	-4.23154	2.32e-05	0.000229137	AAEL019539
LOC5573039	198.942	-1.17502	0.277848	-4.22901	2.35e-05	0.00023143	AAEL021387
LOC5579654	584.997	-2.14642	0.507549	-4.229	2.35e-05	0.00023143	AAEL003970	amino acid transporter [Source:VB Community Annotation]
LOC5575238	2093.72	-0.624966	0.1478	-4.22845	2.35e-05	0.000231843	AAEL011708	heat shock protein [Source:VB Community Annotation]
LOC5569438	535.935	0.656558	0.155302	4.22762	2.36e-05	0.00023254	AAEL001236
LOC5566111	85.2207	-1.1845	0.280323	-4.2255	2.38e-05	0.000234578	AAEL005204
LOC5575326	67.1352	2.0482	0.484764	4.22515	2.39e-05	0.00023479	AAEL002601	Clip-Domain Serine Protease family A. Protease homologue. [Source:VB Community Annotation]	CLIPA1
LOC5573687	21.4328	2.31529	0.548145	4.22387	2.4e-05	0.000235975	AAEL013348	lethal(2)essential for life protein, l2efl [Source:VB Community Annotation]
LOC5579022	29.7789	2.70754	0.641058	4.22354	2.4e-05	0.000236157	AAEL013961
LOC5563894	20.089	-2.07325	0.490896	-4.22339	2.41e-05	0.000236157	AAEL012633
LOC5572945	133.237	-0.94834	0.224576	-4.22281	2.41e-05	0.000236616	AAEL010162
LOC5569579	1329.55	-1.03308	0.244689	-4.22203	2.42e-05	0.000237279	AAEL007764	dipeptidyl-peptidase [Source:VB Community Annotation]
LOC5572584	406.636	-1.04244	0.246957	-4.22112	2.43e-05	0.000238074	AAEL009909	cln3/battenin [Source:VB Community Annotation]
LOC5570114	98.8404	-2.98784	0.708185	-4.219	2.45e-05	0.000240015	AAEL008079	trypsin-alpha, putative [Source:VB Community Annotation]
LOC5563679	38.8381	-1.74545	0.413712	-4.21899	2.45e-05	0.000240015	AAEL000530	Carboxylic ester hydrolase [Source:UniProtKB/TrEMBL;Acc:A0A1S4EW81]
LOC5572295	1825.64	0.467573	0.110836	4.21859	2.46e-05	0.000240286	AAEL007800	cytidine and deoxycytidylate deaminase zinc-binding region [Source:VB Community Annotation]
LOC5568796	743.079	1.38355	0.328003	4.21808	2.46e-05	0.000240667	AAEL028228
LOC5579937	646.064	1.40418	0.333045	4.21618	2.48e-05	0.000242468	AAEL006797	F-box/leucine rich repeat protein [Source:VB Community Annotation]
LOC5568274	325.21	-1.02693	0.243572	-4.2161	2.49e-05	0.000242468	AAEL022413
LOC5571915	52.4166	-1.21991	0.289589	-4.21256	2.52e-05	0.000246141	AAEL018177
LOC5574994	251.933	0.743387	0.176509	4.21161	2.54e-05	0.000246909	AAEL002503	yippee protein [Source:VB Community Annotation]
LOC110676181	56.1693	1.32311	0.314168	4.21148	2.54e-05	0.000246909	AAEL022999
LOC5575748	434.116	-0.925383	0.219732	-4.21141	2.54e-05	0.000246909	AAEL012057	enhancer of polycomb [Source:VB Community Annotation]
LOC5565312	102.732	-1.12563	0.267297	-4.21117	2.54e-05	0.000247014	AAEL004711	testis specific leucine rich repeat protein [Source:VB Community Annotation]
LOC5575406	460.662	-2.97525	0.70666	-4.2103	2.55e-05	0.000247774	AAEL011809	glucose dehydrogenase [Source:VB Community Annotation]
LOC5570300	94.3386	-2.52997	0.600918	-4.21018	2.55e-05	0.000247774	AAEL015345
LOC5573751	248.602	-1.04557	0.248425	-4.2088	2.57e-05	0.000249123	AAEL000294
LOC5570423	260.099	0.99973	0.237544	4.20862	2.57e-05	0.000249159	AAEL008330	hexaprenyldihydroxybenzoate methyltransferase [Source:VB Community Annotation]
LOC5567380	453.717	-0.769308	0.18281	-4.20825	2.57e-05	0.000249407	AAEL019841
LOC110681306	101.992	-0.903922	0.214824	-4.20774	2.58e-05	0.000249802	AAEL022272
LOC5568520	1521.14	0.771689	0.183796	4.19862	2.69e-05	0.000259903	AAEL027905
LOC110674176	19.883	2.33528	0.556319	4.19773	2.7e-05	0.000260755	AAEL023837
LOC5564514	9707.01	-2.15277	0.512924	-4.19706	2.7e-05	0.000261267	AAEL004292
LOC5564828	73.5883	2.77988	0.662349	4.19699	2.7e-05	0.000261267	AAEL025975
LOC5571743	579.087	-0.904897	0.215664	-4.19586	2.72e-05	0.0002624	AAEL020482
LOC5566267	10452.6	0.480641	0.114571	4.19515	2.73e-05	0.000263061	AAEL000744	troponin C [Source:VB Community Annotation]
LOC5574816	579.158	-0.762411	0.181779	-4.19416	2.74e-05	0.000264032	AAEL002464	vacuolar ATP synthase subunit f [Source:VB Community Annotation]
LOC5579204	473.362	1.45526	0.347049	4.19323	2.75e-05	0.00026495	AAEL014044
LOC5565138	297.494	-0.860173	0.20522	-4.19146	2.77e-05	0.000266847	AAEL004643	mitochondrial ribosomal protein L1 [Source:VB Community Annotation]	mRpL1
LOC5569902	92.6705	1.68064	0.401142	4.18963	2.79e-05	0.000268838	AAEL007989
LOC5573835	1110.46	0.626216	0.149496	4.18885	2.8e-05	0.000269588	AAEL010755
LOC5569222	954.566	-0.948228	0.226563	-4.18528	2.85e-05	0.00027368	AAEL007494	calcineurin b subunit [Source:VB Community Annotation]
LOC5576217	222.722	0.930741	0.22251	4.18293	2.88e-05	0.000276347	AAEL029007	3-hydroxyacyl-coa dehyrogenase [Source:UniProtKB/TrEMBL;Acc:Q17H10]
LOC5566911	964.24	-1.13087	0.270472	-4.18109	2.9e-05	0.000278297	AAEL017053
LOC5564922	260.456	0.668283	0.159837	4.18103	2.9e-05	0.000278297	AAEL004490	Putative prohibitins and stomatins of the pid superfamily protein [Source:UniProtKB/TrEMBL;Acc:A0A0P6ITV8]
LOC5578848	66.3106	-1.2524	0.299857	-4.17666	2.96e-05	0.000283513	AAEL014362
LOC110673985	52.1537	-1.83456	0.439318	-4.17593	2.97e-05	0.000284239	AAEL001289	permease, putative [Source:VB Community Annotation]
LOC5573593	1231.15	-1.14098	0.273249	-4.17561	2.97e-05	0.00028446	AAEL002088	sodium channel, auxiliary protein, putative [Source:VB Community Annotation]
LOC5577227	536.274	0.698392	0.167319	4.17401	2.99e-05	0.000286276	AAEL003130	bcr-associated protein, bap [Source:VB Community Annotation]
LOC5574180	170.004	0.793194	0.190149	4.17144	3.03e-05	0.000289345	AAEL002304	porphobilinogen synthase [Source:VB Community Annotation]
LOC5576480	578.273	1.02039	0.244691	4.17011	3.04e-05	0.000290844	AAEL002892	protein kinase c, mu [Source:VB Community Annotation]
LOC5577899	2679.33	-0.504155	0.120921	-4.1693	3.06e-05	0.000291696	AAEL019883
LOC5574569	210.555	0.665455	0.159621	4.16898	3.06e-05	0.000291912	AAEL011239	short-chain dehydrogenase [Source:VB Community Annotation]
LOC5574592	1654.81	-0.761294	0.182664	-4.16773	3.08e-05	0.000293324	AAEL002411
LOC5575020	243.837	-0.964535	0.23144	-4.16754	3.08e-05	0.000293387	AAEL026551
LOC5573778	2742.35	0.869675	0.208817	4.16476	3.12e-05	0.000296786	AAEL000293	ebna2 binding protein P100 [Source:VB Community Annotation]
LOC110674084	56.3379	-1.66716	0.400375	-4.164	3.13e-05	0.000297586	AAEL022176
LOC5569432	105.496	1.04899	0.251941	4.16363	3.13e-05	0.000297877	AAEL007634	Protein KRTCAP2 homolog [Source:UniProtKB/Swiss-Prot;Acc:Q1HQF8]
LOC5580184	1486.64	-0.566473	0.136073	-4.16301	3.14e-05	0.000298493	AAEL002550	polyA-binding protein interacting protein, putative [Source:VB Community Annotation]
LOC5567494	506.68	0.714622	0.171697	4.1621	3.15e-05	0.000299496	AAEL000941	mitochondrial inner membrane protein translocase, 8kD-subunit, putative [Source:VB Community Annotation]
LOC5570318	3908.77	0.789835	0.189894	4.15935	3.19e-05	0.000302917	AAEL008257	heterogeneous nuclear ribonucleoprotein 27c [Source:VB Community Annotation]
LOC110681118	509.652	2.03463	0.489185	4.15921	3.19e-05	0.000302917	AAEL020799
LOC5568319	417.881	0.628581	0.151166	4.1582	3.21e-05	0.000304062	AAEL006727	multisynthetase complex, auxiliary protein, p38, putative [Source:VB Community Annotation]
LOC5571267	153.373	0.835431	0.201026	4.15583	3.24e-05	0.000307041	AAEL001573
LOC5580248	186.416	-1.05444	0.253918	-4.15268	3.29e-05	0.000310997	AAEL019691	Short neuropeptide F [Source:UniProtKB/Swiss-Prot;Acc:A0SIX6]	sNPF
LOC5578026	57.9544	1.376	0.331359	4.15261	3.29e-05	0.000310997	AAEL003380	Cytochrome P450 [Source:UniProtKB/TrEMBL;Acc:A0A1S4F4H4]	CYP4H28
LOC5563701	3532.23	0.892864	0.215047	4.15195	3.3e-05	0.000311689	AAEL019406
LOC110681071	12.4899	-3.62605	0.873463	-4.15135	3.31e-05	0.000312318	AAEL027020
LOC5576477	5050.41	0.510682	0.123026	4.15099	3.31e-05	0.000312601	AAEL002887	Armadillo segment polarity protein [Source:UniProtKB/Swiss-Prot;Acc:Q17GS9]	arm
LOC5575168	368.686	0.791243	0.190631	4.15065	3.32e-05	0.000312868	AAEL000324	tyrosine-protein kinase drl [Source:VB Community Annotation]
LOC5571799	129.291	-2.29846	0.553896	-4.14963	3.33e-05	0.000314072	AAEL009323	carbonic anhydrase precursor [Source:VB Community Annotation]
LOC5571289	3013.59	0.716033	0.172728	4.14545	3.39e-05	0.000319645	AAEL019546
LOC110675357	4.46087	-5.90515	1.42467	-4.14493	3.4e-05	0.00032017	AAEL024970
LOC5569869	1002.44	-1.12185	0.270689	-4.14445	3.41e-05	0.000320642	AAEL007971	tyrosine transporter [Source:VB Community Annotation]
LOC5577895	43.4389	-1.66053	0.40072	-4.14386	3.42e-05	0.000321256	AAEL001076	lipase [Source:VB Community Annotation]
LOC5574516	17399	-1.21878	0.294249	-4.14199	3.44e-05	0.000323684	AAEL011184	mitochondrial phosphate carrier protein [Source:VB Community Annotation]
LOC5573866	330.167	0.616149	0.148763	4.14182	3.45e-05	0.000323722	AAEL010784
LOC5572656	1083.94	-0.883005	0.213213	-4.14142	3.45e-05	0.000324069	AAEL001878	lipase [Source:VB Community Annotation]
LOC110675377	59.8045	-1.20002	0.290064	-4.13709	3.52e-05	0.000330046	AAEL020046
LOC110675564	25.9815	-1.83522	0.443654	-4.1366	3.52e-05	0.000330531	AAEL025731
LOC5572563	181.083	1.2658	0.306023	4.13629	3.53e-05	0.000330778	AAEL009879
LOC5575535	1374.21	0.572348	0.138382	4.13601	3.53e-05	0.000330969	AAEL011905	myosin i [Source:VB Community Annotation]
LOC5567894	300.016	-0.73292	0.177258	-4.13477	3.55e-05	0.000332548	AAEL018118
LOC110678066	343.294	-1.80665	0.437083	-4.13344	3.57e-05	0.000334272	AAEL025532
LOC5574849	100.735	-1.30347	0.315398	-4.13278	3.58e-05	0.00033502	AAEL011454
LOC5565320	109.017	-1.46831	0.355392	-4.13153	3.6e-05	0.000336636	AAEL004713
LOC5576424	75.9286	1.69317	0.40986	4.13108	3.61e-05	0.000337071	AAEL024339
LOC110677732	12926.6	-2.62465	0.635367	-4.13092	3.61e-05	0.000337098	AAEL025555
LOC5576537	1773.73	-1.22883	0.297575	-4.12948	3.64e-05	0.000338996	AAEL024887
LOC5566545	32.071	-1.62301	0.393063	-4.12913	3.64e-05	0.000339304	AAEL005479	synaptogyrin, [Source:VB Community Annotation]
LOC5564156	95.0528	1.3864	0.335774	4.12897	3.64e-05	0.000339325	AAEL004127	acyl-coa dehydrogenase [Source:VB Community Annotation]
LOC110675611	231.961	1.2684	0.307283	4.12781	3.66e-05	0.000340828	AAEL026833
LOC5576287	230.62	1.1538	0.279562	4.12718	3.67e-05	0.000341544	AAEL012439	enoyl-CoA hydratase (enoyl hydrase) (unsaturated acyl-CoA hydratase), putative [Source:VB Community Annotation]
LOC5572695	71.7342	-1.1871	0.287704	-4.12613	3.69e-05	0.000342796	AAEL009965
LOC5573670	76.7122	-1.32264	0.320558	-4.12605	3.69e-05	0.000342796	AAEL010657
LOC5565141	324.99	0.929902	0.22545	4.12464	3.71e-05	0.000344685	AAEL004633	nicastrin, putative [Source:VB Community Annotation]
LOC5573065	8026.61	-0.795083	0.192784	-4.12422	3.72e-05	0.000345099	AAEL014511
LOC110680225	420.709	0.695221	0.168697	4.12113	3.77e-05	0.000349318	AAEL027169
LOC5567522	420.709	0.695221	0.168697	4.12113	3.77e-05	0.000349318	AAEL027583
LOC5572356	90.4555	0.918792	0.222969	4.12071	3.78e-05	0.000349529	AAEL009757
LOC5566102	98.0507	1.43089	0.347243	4.1207	3.78e-05	0.000349529	AAEL015070	alkaline phosphatase [Source:VB Community Annotation]	mALP
LOC5577237	1369.45	-1.20179	0.291657	-4.12054	3.78e-05	0.00034956	AAEL003135
LOC23687567	1091.11	0.88444	0.214707	4.11929	3.8e-05	0.000351234	AAEL020259
LOC5566019	85.2087	0.996421	0.241921	4.11879	3.81e-05	0.000351791	AAEL005118
LOC5573072	3924.77	-1.13652	0.275964	-4.11838	3.82e-05	0.000352191	AAEL010260
LOC5571294	227.725	-1.08804	0.264391	-4.11527	3.87e-05	0.000356751	AAEL001582	kinesin [Source:VB Community Annotation]
LOC110677755	1039.24	0.842738	0.204792	4.11509	3.87e-05	0.0003568	AAEL020671
LOC5568821	287.816	0.60333	0.146639	4.11439	3.88e-05	0.000357667	AAEL001191
LOC5564892	1100.44	0.634648	0.154278	4.11368	3.89e-05	0.000358545	AAEL004451	organic cation transporter [Source:VB Community Annotation]
LOC5570826	111.32	0.963422	0.234217	4.11338	3.9e-05	0.000358789	AAEL008609	zinc carboxypeptidase [Source:VB Community Annotation]
LOC5580171	294.983	-0.897511	0.218281	-4.11172	3.93e-05	0.000361017	AAEL002546
LOC5564797	263.764	-0.60185	0.146376	-4.11166	3.93e-05	0.000361017	AAEL004441	importin 9 (imp9) (ran-binding protein 9) [Source:VB Community Annotation]
LOC5569606	279.71	1.35652	0.329956	4.11123	3.94e-05	0.000361477	AAEL001261
LOC5565453	38.5874	-3.96148	0.964185	-4.10863	3.98e-05	0.000365344	AAEL000667	alpha-amylase [Source:VB Community Annotation]
LOC5579797	1706.5	-0.457098	0.111258	-4.10845	3.98e-05	0.00036539	AAEL003972
LOC110678524	4.29021	-5.84732	1.4236	-4.10742	4e-05	0.000366793	AAEL028010
LOC5565665	210.715	1.17767	0.286812	4.10606	4.02e-05	0.000368624	AAEL004898
LOC110679169	107.834	1.37943	0.335956	4.10599	4.03e-05	0.000368624	AAEL027231
LOC23687839	3575.55	0.952484	0.232048	4.10468	4.05e-05	0.000370485	AAEL017419
LOC5576232	196.965	1.50695	0.36718	4.10413	4.06e-05	0.000371142	AAEL002820	XK-related protein [Source:UniProtKB/TrEMBL;Acc:A0A1S4F2X2]
LOC110678697	8.0416	-4.87553	1.18803	-4.10388	4.06e-05	0.000371306	AAEL026339
LOC5572569	1020.4	-1.00223	0.244235	-4.10356	4.07e-05	0.000371592	AAEL009881	dynein heavy chain [Source:VB Community Annotation]
LOC5577541	27.3669	-1.84678	0.450312	-4.10111	4.11e-05	0.000375324	AAEL013257
LOC5566110	657.865	0.867448	0.211592	4.09962	4.14e-05	0.000377501	AAEL005179
LOC5576888	12.7022	-2.38022	0.580728	-4.09868	4.16e-05	0.000378741	AAEL026862
LOC5575143	289.979	0.620663	0.151434	4.09858	4.16e-05	0.000378741	AAEL012974	Glycine cleavage system H protein [Source:UniProtKB/TrEMBL;Acc:Q0IE94]
LOC5574507	373.8	0.84952	0.207304	4.09794	4.17e-05	0.00037955	AAEL002374	taxilin [Source:VB Community Annotation]
LOC5576911	307.483	2.56543	0.626057	4.09777	4.17e-05	0.000379604	AAEL012852	trypsin [Source:VB Community Annotation]
LOC5577608	366.457	1.62749	0.397206	4.09736	4.18e-05	0.000380034	AAEL003221	pupal cuticle protein 78E, putative [Source:VB Community Annotation]
LOC5573026	44.4551	-2.10642	0.514211	-4.09641	4.2e-05	0.000381372	AAEL010201	axonemal dynein intermediate chain [Source:VB Community Annotation]
LOC5573257	217.028	-1.8792	0.458862	-4.09536	4.22e-05	0.000382868	AAEL010334
LOC110677946	4.46542	-5.9055	1.44228	-4.09456	4.23e-05	0.000383951	AAEL020045
LOC110675430	47.6062	-1.60161	0.391433	-4.09166	4.28e-05	0.000388542	AAEL020516
LOC5580178	75.875	-1.66559	0.40741	-4.08824	4.35e-05	0.000394073	AAEL027912
LOC23687681	43.2623	-1.7722	0.433634	-4.08685	4.37e-05	0.000396201	AAEL028056
LOC110676432	29.0873	-2.63001	0.643629	-4.08622	4.38e-05	0.000397038	AAEL023715
LOC5565594	273.155	0.731357	0.179022	4.0853	4.4e-05	0.00039836	AAEL004866	protein farnesyltransferase beta subunit [Source:VB Community Annotation]
LOC5576127	6897.37	-0.768803	0.188198	-4.08509	4.41e-05	0.000398445	AAEL019525
LOC5570222	167.597	0.74394	0.182116	4.08497	4.41e-05	0.000398445	AAEL008186
LOC5569794	2034.58	1.07227	0.262504	4.08477	4.41e-05	0.000398549	AAEL001299
LOC5576461	358.874	-0.839266	0.205515	-4.08372	4.43e-05	0.00040001	AAEL002895
LOC5579977	149.34	0.901114	0.220665	4.08363	4.43e-05	0.00040001	AAEL007738	app binding protein [Source:VB Community Annotation]
LOC23687980	891.9	0.533133	0.130606	4.082	4.46e-05	0.000402581	AAEL017560
LOC5566385	3019.31	0.665698	0.163097	4.08161	4.47e-05	0.000403006	AAEL019833
LOC110675422	1253.93	0.778676	0.190785	4.08143	4.48e-05	0.000403079	AAEL027616
LOC110677824	16.0464	-2.17684	0.533486	-4.0804	4.5e-05	0.000404431	AAEL023905
LOC110678433	8.94423	-2.86098	0.701157	-4.08037	4.5e-05	0.000404431	AAEL026145	pickpocket 307 [Source:VB Community Annotation]	ppk307
LOC5574363	774.182	-0.882196	0.216222	-4.08004	4.5e-05	0.000404755	AAEL011081
LOC5569585	1101.98	-0.77798	0.190821	-4.07702	4.56e-05	0.000409795	AAEL001281
LOC5576621	213.788	-0.863529	0.211872	-4.07571	4.59e-05	0.000411869	AAEL012645
LOC5568818	606.982	1.25899	0.309016	4.07421	4.62e-05	0.000414275	AAEL001173	amidase [Source:VB Community Annotation]
LOC5578695	311.522	-0.900567	0.221087	-4.07336	4.63e-05	0.000415319	AAEL003613		sage
LOC5564410	210.622	-0.882272	0.216597	-4.07334	4.63e-05	0.000415319	AAEL019686
LOC110675229	107.681	-1.5184	0.372954	-4.07127	4.68e-05	0.000418781	AAEL023086
LOC5578221	142.872	1.07196	0.263328	4.0708	4.69e-05	0.000419373	AAEL024259
LOC110677894	420.857	0.931326	0.228844	4.06969	4.71e-05	0.000421119	AAEL002456	b-cell lymphoma/leukemia [Source:VB Community Annotation]
LOC5572214	151.316	-1.50467	0.37002	-4.06647	4.77e-05	0.000426558	AAEL009632	short-chain dehydrogenase [Source:VB Community Annotation]
LOC5571273	3037.09	1.50077	0.369064	4.06641	4.77e-05	0.000426558	AAEL001553
LOC5575707	80.2	-0.90268	0.222099	-4.06432	4.82e-05	0.000430145	AAEL012015	DEAD box ATP-dependent RNA helicase [Source:VB Community Annotation]
LOC110681180	228.305	-1.22104	0.300444	-4.06413	4.82e-05	0.000430228	AAEL022078
LOC5563737	172.363	-0.871868	0.214631	-4.06218	4.86e-05	0.000433498	AAEL014092
LOC5570552	865.463	0.578071	0.142309	4.06209	4.86e-05	0.000433498	AAEL008370	Class B Scavenger Receptor (CD36 domain). [Source:VB Community Annotation]	SCRB17
LOC5564972	1645.24	1.20821	0.297452	4.06185	4.87e-05	0.000433498	AAEL004523	preprotein translocase secy subunit (sec61) [Source:VB Community Annotation]
LOC23687787	971.45	1.96972	0.484946	4.06173	4.87e-05	0.000433498	AAEL017367
LOC5579893	140.401	-0.790149	0.194538	-4.06166	4.87e-05	0.000433498	AAEL001029
LOC5565814	193.936	-3.07183	0.756328	-4.06151	4.88e-05	0.000433519	AAEL025577
LOC5572512	172.588	0.70787	0.17434	4.06029	4.9e-05	0.000435386	AAEL009842	Galectin [Source:UniProtKB/TrEMBL;Acc:Q16UP1]	GALE12
LOC5565528	35.443	-1.40437	0.345895	-4.06011	4.9e-05	0.000435386	AAEL004861	peroxisomal integral membrane protein Per8p, putative [Source:VB Community Annotation]
LOC110674747	37.4408	1.741	0.428808	4.06009	4.91e-05	0.000435386	AAEL028085
LOC5567779	242.123	1.45102	0.35743	4.05959	4.92e-05	0.00043606	AAEL000101	AMP dependent coa ligase [Source:VB Community Annotation]
LOC5563775	10.3478	-3.83393	0.944524	-4.05911	4.93e-05	0.000436646	AAEL003925
LOC5571810	223.927	0.646059	0.159167	4.05899	4.93e-05	0.000436646	AAEL001705	odorant response protein ODR-4, putative [Source:VB Community Annotation]
LOC110678719	11.2475	-2.44051	0.601487	-4.05745	4.96e-05	0.00043927	AAEL020672
LOC5575876	54.2882	-1.49777	0.369277	-4.05595	4.99e-05	0.000441835	AAEL002742
LOC5577991	1149.45	0.714486	0.176181	4.0554	5e-05	0.000442618	AAEL003383	actin [Source:VB Community Annotation]
LOC110674038	1254.12	0.959083	0.236656	4.05264	5.06e-05	0.000447604	AAEL023845
LOC5564270	3496.95	0.997921	0.246373	4.05045	5.11e-05	0.000451548	AAEL014369
LOC5570899	1534.73	1.89836	0.468751	4.04982	5.13e-05	0.000452496	AAEL001494
LOC5579807	176.076	0.861291	0.2127	4.04931	5.14e-05	0.000453202	AAEL003954	juvenile hormone-inducible protein, putative [Source:VB Community Annotation]
LOC110675600	4.75651	-5.9896	1.47937	-4.04875	5.15e-05	0.000454019	AAEL021818
LOC5567303	1345.25	-2.03227	0.502078	-4.04772	5.17e-05	0.000455748	AAEL005969	phospholipase b, plb1 [Source:VB Community Annotation]
LOC5571191	1303.66	-2.06471	0.510153	-4.04724	5.18e-05	0.000456413	AAEL022982
LOC5578107	3008.19	0.458809	0.113381	4.04662	5.2e-05	0.000457358	AAEL003407
LOC5574208	5201.35	0.749677	0.185327	4.04515	5.23e-05	0.000459962	AAEL002287	trans-prenyltransferase [Source:VB Community Annotation]
LOC5576900	94.3881	0.972975	0.240584	4.04422	5.25e-05	0.000461515	AAEL021618
LOC110680933	51.336	1.32068	0.326857	4.04053	5.33e-05	0.000468547	AAEL026931
LOC5573930	567.333	2.00479	0.496385	4.03878	5.37e-05	0.000471778
LOC5576455	132.205	1.84016	0.455639	4.03864	5.38e-05	0.000471778	AAEL012538	leucine-rich immune protein (Short) [Source:VB Community Annotation]	LRIM6
LOC5566691	279.83	-0.796126	0.197156	-4.03804	5.39e-05	0.000472708	AAEL027606
LOC5565190	871.336	0.782644	0.193835	4.03769	5.4e-05	0.000473133	AAEL014749	ral [Source:VB Community Annotation]
LOC5565208	1586.1	0.907692	0.224917	4.03567	5.44e-05	0.000476939	AAEL019898
LOC5576150	12.5578	-4.41132	1.09329	-4.03489	5.46e-05	0.000478238	AAEL012349	lipase 1 precursor [Source:VB Community Annotation]
LOC110678702	14.4317	-2.38493	0.591122	-4.03458	5.47e-05	0.000478571	AAEL025937
LOC5565828	420.612	0.831857	0.206188	4.03445	5.47e-05	0.000478571	AAEL014999
LOC5574793	105.579	0.925157	0.229393	4.03307	5.51e-05	0.000481118	AAEL002483
LOC5568195	2153.14	0.757058	0.187829	4.03057	5.56e-05	0.000485976	AAEL006619
LOC5574636	550.024	-0.542859	0.134705	-4.02998	5.58e-05	0.000486597	AAEL011273	uridine cytidine kinase i [Source:VB Community Annotation]	ucdk1
LOC5568624	171.177	1.05476	0.261736	4.02986	5.58e-05	0.000486597	AAEL006962
LOC5577024	491.523	-0.678907	0.168469	-4.02985	5.58e-05	0.000486597	AAEL025729
LOC5564782	628.715	0.715099	0.177712	4.02391	5.72e-05	0.000498746	AAEL004427	Prefoldin subunit 3 [Source:UniProtKB/TrEMBL;Acc:Q17CV4]
LOC5570158	489.775	0.848625	0.211023	4.02149	5.78e-05	0.000503612	AAEL008133	GTP-binding protein hflx [Source:VB Community Annotation]
LOC5564068	2094.71	-0.869016	0.2162	-4.01949	5.83e-05	0.000507594	AAEL025030
LOC5569251	25.1246	-1.64819	0.41024	-4.01762	5.88e-05	0.00051133	AAEL001231	MIND-MELD/ADAM [Source:VB Community Annotation]
LOC5575531	306.663	-0.884366	0.220152	-4.01706	5.89e-05	0.000512248	AAEL011907
LOC5573765	11.7172	-2.6585	0.661966	-4.01607	5.92e-05	0.000514114	AAEL000266	GPCR Orphan/Putative Class A Family [Source:VB Community Annotation]	GPRNNA21
LOC110676683	37.1601	-1.3392	0.333648	-4.01379	5.98e-05	0.000518785	AAEL021911
LOC5563776	355.922	0.6805	0.16956	4.01334	5.99e-05	0.000519486	AAEL021771
LOC5579813	1847.4	1.50577	0.375332	4.01183	6.03e-05	0.000522509	AAEL005530
LOC5568352	106.333	2.20116	0.548693	4.01164	6.03e-05	0.000522613	AAEL001074	cadherin [Source:VB Community Annotation]
LOC5567058	23.5028	-2.14725	0.535557	-4.00938	6.09e-05	0.000527227	AAEL005776	odorant receptor obligate co-receptor (Orco) [Source:VB Community Annotation]	Orco	SGPRor7
LOC23687604	159.325	-0.934321	0.233039	-4.00929	6.09e-05	0.000527227	AAEL017184
LOC5567456	143.677	-1.48783	0.371133	-4.0089	6.1e-05	0.000527804	AAEL019541
LOC5576783	8.50665	-3.51992	0.87809	-4.00861	6.11e-05	0.000528073	AAEL012766	cytochrome P450 [Source:VB Community Annotation]	CYP325G2
LOC110675984	25.2431	-2.10017	0.523929	-4.0085	6.11e-05	0.000528073	AAEL026909
LOC5579293	1462.15	0.840744	0.209752	4.00829	6.12e-05	0.000528239	AAEL019500
LOC5565467	195.52	-0.979672	0.244421	-4.00813	6.12e-05	0.000528286	AAEL004793	dipeptidyl-peptidase [Source:VB Community Annotation]
LOC5564674	3030.27	-0.514679	0.12843	-4.00745	6.14e-05	0.000529486	AAEL006682
LOC5570587	224.609	0.859664	0.2146	4.00588	6.18e-05	0.000532705	AAEL008397	Glutathione peroxidase [Source:UniProtKB/TrEMBL;Acc:Q5K6H6]	GPXH2
LOC5578279	699.794	-0.61076	0.152651	-4.00101	6.31e-05	0.000543468	AAEL021732
LOC5576567	1199.28	0.684569	0.171105	4.00086	6.31e-05	0.000543494	AAEL025717
LOC5564099	444.07	-0.838676	0.209657	-4.00022	6.33e-05	0.000544653	AAEL014315
LOC5577980	726.798	0.688053	0.172016	3.99993	6.34e-05	0.000545018	AAEL013460	ecotropic viral integration site [Source:VB Community Annotation]
LOC5573256	636.373	1.97339	0.493691	3.99722	6.41e-05	0.000550855	AAEL010338
LOC5564469	1124.51	0.472784	0.118281	3.99713	6.41e-05	0.000550855	AAEL014452	acyl-coa dehydrogenase [Source:VB Community Annotation]
LOC5568497	13.6577	-3.00242	0.751196	-3.99685	6.42e-05	0.000551182	AAEL006909
LOC5575968	1454.59	0.900611	0.225374	3.99607	6.44e-05	0.000552678	AAEL022631
LOC5570943	9.20979	-5.01401	1.2549	-3.99554	6.45e-05	0.000553589	AAEL008681	C-Type Lectin (CTL). [Source:VB Community Annotation]	CTL12
LOC5569761	429.889	-0.858383	0.214935	-3.99369	6.51e-05	0.000557462	AAEL007913	sulfotransferase (sult) [Source:VB Community Annotation]
LOC5579939	441.285	-0.593215	0.148541	-3.99362	6.51e-05	0.000557462	AAEL019925	Guanylate cyclase [Source:UniProtKB/TrEMBL;Acc:Q174S2]
LOC5565973	2738.21	-4.43277	1.11042	-3.99197	6.55e-05	0.00056103	AAEL015022	glycoside hydrolases [Source:VB Community Annotation]
LOC5568450	1030.78	-0.671068	0.168162	-3.99061	6.59e-05	0.000563924	AAEL006863
LOC5565359	69.7149	-1.19107	0.29851	-3.99005	6.61e-05	0.000564901	AAEL004761	serine/threonine-protein kinase MAK [Source:VB Community Annotation]
LOC5567255	286.146	0.834146	0.209063	3.98992	6.61e-05	0.000564901	AAEL005929	ATP-binding cassette transporter [Source:VB Community Annotation]
LOC5568387	236.653	1.36506	0.342276	3.98818	6.66e-05	0.000568744	AAEL006771
LOC110675231	11.5024	3.08663	0.774066	3.98755	6.68e-05	0.00056992	AAEL026572
LOC5571923	191.942	0.663734	0.166475	3.98699	6.69e-05	0.000570941	AAEL009402	map kinase-activated protein kinase (mapkapk) [Source:VB Community Annotation]
LOC110676515	124.358	0.79934	0.20051	3.98654	6.7e-05	0.000571537	AAEL023511
LOC5570401	288.652	-1.311	0.328863	-3.98647	6.71e-05	0.000571537	AAEL012447	elastase, putative [Source:VB Community Annotation]
LOC110676466	14.2378	2.15955	0.541849	3.98552	6.73e-05	0.000573492	AAEL020383
LOC110676948	64212	1.63073	0.409249	3.98468	6.76e-05	0.000575198	AAEL025155
LOC110681476	24.4426	-1.78736	0.448985	-3.9809	6.87e-05	0.000583932	AAEL022466
LOC5572681	995.726	1.33356	0.334995	3.98082	6.87e-05	0.000583932	AAEL009955
LOC5570856	37.5617	1.42076	0.356922	3.9806	6.87e-05	0.000584048	AAEL008622	jnk [Source:VB Community Annotation]
LOC5569091	223.514	0.759296	0.190754	3.9805	6.88e-05	0.000584048	AAEL007355	mitochondrial ribosomal protein, S18A, putative [Source:VB Community Annotation]	mRpS18A
LOC5577357	486.054	0.876126	0.220152	3.97963	6.9e-05	0.000585848	AAEL000471	Monocarboxylate transporter [Source:UniProtKB/TrEMBL;Acc:A0A1S4EVY2]
LOC5567071	1132.91	0.905341	0.227554	3.97858	6.93e-05	0.000588112	AAEL023850
LOC5569145	13333	-1.05426	0.265186	-3.97553	7.02e-05	0.000595359	AAEL007407
LOC5573393	431.749	-0.648337	0.163232	-3.97187	7.13e-05	0.00060425	AAEL002080	septin interacting protein, putative [Source:VB Community Annotation]
LOC5567126	2051.3	-0.700521	0.176506	-3.96882	7.22e-05	0.000611673	AAEL005879	vinculin [Source:VB Community Annotation]
LOC5577197	413.048	-0.690823	0.1741	-3.96796	7.25e-05	0.000613428	AAEL018255
LOC23687451	262.849	-0.789376	0.198942	-3.96786	7.25e-05	0.000613428	AAEL023561
LOC110676870	10.5158	-2.45786	0.619734	-3.966	7.31e-05	0.000617724	AAEL025462
LOC5571800	75.7831	-0.919938	0.23196	-3.96593	7.31e-05	0.000617724	AAEL009327
LOC5567858	541.838	-0.697221	0.17581	-3.96576	7.32e-05	0.000617795	AAEL006321	1-acylglycerol-3-phosphate acyltransferase [Source:UniProtKB/TrEMBL;Acc:Q176M5]
LOC5572121	1086.91	0.479553	0.120933	3.96546	7.33e-05	0.000617881	AAEL009526
LOC5572122	1086.91	0.479553	0.120933	3.96546	7.33e-05	0.000617881	AAEL009534	dimethyladenosine transferase [Source:VB Community Annotation]
LOC110676342	46.8369	-1.15831	0.292152	-3.96475	7.35e-05	0.000619353	AAEL014235	calmodulin, putative [Source:VB Community Annotation]
LOC5564334	1618.48	0.55761	0.140695	3.96326	7.39e-05	0.000622884	AAEL022076
LOC5571212	754.471	-1.0125	0.255631	-3.96079	7.47e-05	0.000629003	AAEL006905
LOC5571806	24.2099	2.03401	0.513856	3.95833	7.55e-05	0.000635157	AAEL009325
LOC5563933	46.9596	-1.14575	0.289503	-3.95765	7.57e-05	0.000636537	AAEL027196
LOC5569801	8194.91	0.867381	0.219177	3.95744	7.58e-05	0.000636537	AAEL001290
LOC110675354	45.878	-2.297	0.580432	-3.9574	7.58e-05	0.000636537	AAEL019759
LOC5564185	803.113	0.664534	0.168001	3.95553	7.64e-05	0.000641184	AAEL014335
LOC5564379	414.612	0.695047	0.175729	3.95522	7.65e-05	0.000641659	AAEL014414	DEAD box ATP-dependent RNA helicase [Source:VB Community Annotation]
LOC110677897	972.453	-0.921298	0.232945	-3.955	7.65e-05	0.000641884	AAEL025502
LOC5574868	145.394	-0.910009	0.23014	-3.95415	7.68e-05	0.000643791	AAEL025645
LOC5570772	5361.41	-2.02991	0.513583	-3.95246	7.74e-05	0.000647995	AAEL019441
LOC5570994	1125.51	0.587001	0.148612	3.9499	7.82e-05	0.000654594	AAEL008740	synaptic glycoprotein sc2 [Source:VB Community Annotation]
LOC5576157	742.485	-0.89928	0.227723	-3.94901	7.85e-05	0.000656657	AAEL012352
LOC5573148	8.71604	-3.964	1.00439	-3.94669	7.92e-05	0.000662682	AAEL002024	protein serine/threonine kinase, putative [Source:VB Community Annotation]
LOC5577098	1304.55	0.495709	0.125643	3.94538	7.97e-05	0.000665925	AAEL012987
LOC5569610	47.5113	2.10632	0.534006	3.94438	8e-05	0.000668328	AAEL001256
LOC5574062	730.422	0.521918	0.132333	3.94398	8.01e-05	0.000669078	AAEL010905
LOC5577411	543.696	1.05365	0.267166	3.9438	8.02e-05	0.000669194	AAEL003154	aldo-keto reductase [Source:VB Community Annotation]
LOC5580190	717.449	0.491806	0.124762	3.94196	8.08e-05	0.00067397	AAEL002548	tuberous sclerosis 1 [Source:VB Community Annotation]	Tsc1
LOC23687501	1460.91	-0.600499	0.152345	-3.94171	8.09e-05	0.000674306	AAEL017081
LOC5577300	23.3649	2.96566	0.752492	3.94112	8.11e-05	0.000675576	AAEL013152
LOC5565330	343.99	1.00371	0.254832	3.9387	8.19e-05	0.000682052	AAEL014821
LOC5564011	337.756	0.540703	0.137288	3.93845	8.2e-05	0.000682354	AAEL014272	molybdopterin cofactor sulfurase (mosc) [Source:VB Community Annotation]
LOC5574726	274.513	-1.06373	0.270139	-3.93772	8.23e-05	0.00068407	AAEL011366
LOC5571184	54.2955	-1.03907	0.263912	-3.9372	8.24e-05	0.00068516	AAEL024100
LOC5577734	631.863	0.616293	0.1566	3.93546	8.3e-05	0.000689747	AAEL019516
LOC5565121	614.04	-0.597462	0.151838	-3.93487	8.32e-05	0.000690327	AAEL014732
LOC5566765	788.224	0.928177	0.235886	3.93486	8.32e-05	0.000690327	AAEL005634	harmonin (Usher syndrome 1C protein homolog) (PDZ domain-containing protein) [Source:VB Community Annotation]
LOC5563924	18.681	-1.77467	0.451012	-3.93486	8.32e-05	0.000690327	AAEL021100
LOC5575848	1775.93	-0.700347	0.178057	-3.93328	8.38e-05	0.000694469	AAEL012113	vacuolar ATP synthase proteolipid subunit [Source:VB Community Annotation]
LOC5568315	44.3047	1.22377	0.311237	3.93197	8.43e-05	0.000697888	AAEL006754
LOC5565935	233.115	-0.895962	0.227896	-3.93145	8.44e-05	0.000698999	AAEL005072	MRAS2, putative [Source:VB Community Annotation]
LOC110680630	274.736	0.718001	0.182794	3.92792	8.57e-05	0.000708948	AAEL026813
LOC5566613	155.464	-0.918389	0.233819	-3.92778	8.57e-05	0.000708965	AAEL000757	anterior fat body protein [Source:VB Community Annotation]
LOC5572327	6901.02	1.08002	0.275127	3.92553	8.65e-05	0.000715216	AAEL009723	fibrinogen and fibronectin [Source:VB Community Annotation]
LOC5570733	808.539	-0.487946	0.124309	-3.92526	8.66e-05	0.000715613	AAEL008507	srpk [Source:VB Community Annotation]
LOC110679115	197.834	1.50521	0.383495	3.92499	8.67e-05	0.000716012	AAEL024567
LOC5568311	24.1724	-1.63023	0.41588	-3.91994	8.86e-05	0.000730426	AAEL006732
LOC5578743	2169.59	0.746582	0.190461	3.91987	8.86e-05	0.000730426	AAEL003658	laminin beta-2 chain [Source:VB Community Annotation]
LOC5574515	6109.47	-0.470629	0.120065	-3.91979	8.86e-05	0.000730426	AAEL019717	Mitochondrial phosphate carrier protein [Source:UniProtKB/TrEMBL;Acc:Q1HQX9]
LOC5576950	4120.82	0.456575	0.116491	3.91941	8.88e-05	0.000731182	AAEL012904	rab gdp-dissociation inhibitor [Source:VB Community Annotation]
LOC5570084	755.119	2.50317	0.639007	3.91727	8.96e-05	0.000737265	AAEL001346
LOC5571107	425.832	0.686231	0.175311	3.91435	9.06e-05	0.000745829	AAEL001526	zinc finger protein [Source:VB Community Annotation]
LOC5571938	116.93	-0.881012	0.225096	-3.91393	9.08e-05	0.000746727	AAEL001268
LOC5567092	197.53	-2.88204	0.736731	-3.91192	9.16e-05	0.000752533	AAEL012311	vitellogenin, putative [Source:VB Community Annotation]
LOC5577784	829.71	0.586398	0.149915	3.91155	9.17e-05	0.000753288	AAEL013374	disconnected protein [Source:VB Community Annotation]
LOC5578975	267.724	-1.15634	0.295643	-3.91129	9.18e-05	0.000753687	AAEL024153
LOC5572018	79.0438	-1.128	0.288526	-3.90952	9.25e-05	0.000758802	AAEL000251
LOC5574100	922.733	0.534679	0.136849	3.90708	9.34e-05	0.000766066	AAEL002271	26S proteasome regulatory subunit S3 [Source:UniProtKB/TrEMBL;Acc:Q17IR8]
LOC5574647	345.45	0.611429	0.156502	3.90685	9.35e-05	0.00076638	AAEL011289
LOC110680405	135.259	-0.842779	0.215735	-3.90654	9.36e-05	0.000766765	AAEL020945
LOC5574056	584.786	0.587047	0.150276	3.90646	9.37e-05	0.000766765	AAEL010892
LOC5564548	52.3223	-1.04191	0.26679	-3.90533	9.41e-05	0.000769919	AAEL004316
LOC110680300	20.3404	-1.77624	0.4549	-3.90468	9.44e-05	0.000771585	AAEL026650
LOC5570648	85.8734	1.19005	0.304838	3.90389	9.47e-05	0.000773679	AAEL008468	cysteine synthase [Source:VB Community Annotation]
LOC5564502	149.912	-0.844759	0.216424	-3.90326	9.49e-05	0.000775241	AAEL004295	Glucose-6-phosphatase [Source:UniProtKB/TrEMBL;Acc:Q17D95]
LOC5575484	121.703	-0.885986	0.227062	-3.90195	9.54e-05	0.000779033	AAEL011862
LOC5573421	275.308	-0.847189	0.217129	-3.90178	9.55e-05	0.000779164	AAEL002049	circadian protein clock/arnt/bmal/pas [Source:VB Community Annotation]	CYC
LOC5569595	119.339	-0.933004	0.239199	-3.90054	9.6e-05	0.000782724	AAEL001245	heterogeneous nuclear ribonucleoprotein [Source:VB Community Annotation]
LOC5569471	1044.82	-0.432116	0.110816	-3.89939	9.64e-05	0.000786019	AAEL007660	suppressor of actin (sac) [Source:VB Community Annotation]
LOC5572390	101.176	0.927769	0.237949	3.89902	9.66e-05	0.000786785	AAEL009779	NBP2b protein, putative [Source:VB Community Annotation]
LOC5576360	1813.02	-1.02972	0.264151	-3.89822	9.69e-05	0.000788917	AAEL002860	Mitochondrial pyruvate carrier [Source:UniProtKB/TrEMBL;Acc:Q17GV8]
LOC5574712	295.088	2.03935	0.523166	3.8981	9.7e-05	0.000788917	AAEL011345
LOC5574077	9.81456	-3.47156	0.89075	-3.89735	9.73e-05	0.000790913	AAEL021209
LOC5574930	314.181	0.868255	0.222841	3.8963	9.77e-05	0.000793902	AAEL011536	phosphoglucomutase [Source:VB Community Annotation]
LOC110677724	7.99632	-3.39959	0.87265	-3.89571	9.79e-05	0.000795284	AAEL022551
LOC5575629	235.479	-1.49014	0.382517	-3.89561	9.8e-05	0.000795284	AAEL011962
LOC5573285	417.22	0.646416	0.16594	3.89548	9.8e-05	0.000795284	AAEL010378
LOC5572518	5399.93	2.63568	0.677028	3.89301	9.9e-05	0.000802731	AAEL009849
LOC5576438	403.756	-1.12462	0.288885	-3.89296	9.9e-05	0.000802731	AAEL012526
LOC5570910	236.279	-1.5518	0.398666	-3.89249	9.92e-05	0.00080384	AAEL018240
LOC5567927	572.832	-1.82167	0.468257	-3.89033	0.000100109	0.000810588	AAEL006372	sulphate transporter [Source:VB Community Annotation]
LOC5578982	1295.76	0.481533	0.1238	3.8896	0.00010041	0.00081258	AAEL019560
LOC110675468	66.5486	1.38191	0.355544	3.88676	0.000101593	0.000821701	AAEL024835
LOC5574172	80.9305	1.11043	0.285705	3.88661	0.000101653	0.000821737	AAEL002285	zinc finger protein [Source:VB Community Annotation]
LOC5575776	4267.98	1.04008	0.267655	3.88591	0.000101947	0.000823214	AAEL002718	chitin synthase [Source:VB Community Annotation]
LOC110680778	777.981	-0.610492	0.157104	-3.88591	0.000101947	0.000823214	AAEL005877
LOC5564977	195.381	0.648362	0.166856	3.88575	0.000102013	0.000823294	AAEL004515
LOC5564737	422.601	0.725676	0.186769	3.88541	0.000102156	0.000824	AAEL014594	cytochrome P450 [Source:VB Community Annotation]	CYP301A1
LOC5567280	29.4096	-2.07667	0.534557	-3.88485	0.000102393	0.000825458	AAEL012412	slit protein [Source:VB Community Annotation]
LOC5571159	207.105	-0.659589	0.169815	-3.88417	0.000102681	0.000827326	AAEL027868
LOC5573959	1353.57	1.10332	0.284171	3.88261	0.000103343	0.000831926	AAEL025216
LOC5572760	88.5012	1.04759	0.26982	3.88256	0.000103364	0.000831926	AAEL020430
LOC5565677	86.4615	1.04279	0.268689	3.88105	0.000104008	0.000836654	AAEL020430
LOC5564347	438.804	-0.697752	0.179805	-3.8806	0.000104201	0.000837747	AAEL004200	DNA replication licensing factor MCM8 [Source:VB Community Annotation]
LOC5564753	157.334	2.21883	0.572051	3.87872	0.000105006	0.000843763
LOC5577985	1045.95	-0.545811	0.140758	-3.87764	0.000105473	0.000847055	AAEL013461	parvin [Source:VB Community Annotation]
LOC5571132	4179.62	0.780139	0.201199	3.87745	0.000105558	0.000847277	AAEL008832	forkhead box protein (AaegFOXN1) [Source:VB Community Annotation]
LOC110676774	401.886	0.714906	0.184464	3.87558	0.000106369	0.000853321	AAEL027182
LOC5575847	138.067	0.949393	0.244983	3.87535	0.000106472	0.000853684	AAEL012126	F-box/lrr protein, drome [Source:VB Community Annotation]
LOC23687515	25.0011	-1.67151	0.43143	-3.87434	0.000106914	0.000856759	AAEL017095
LOC5578209	9.49264	-3.43579	0.887341	-3.87201	0.000107943	0.00086454	AAEL019870
LOC110677057	9.77077	-2.97384	0.768242	-3.87097	0.000108402	0.000867743	AAEL020662
LOC5567893	92.4192	-1.40548	0.363157	-3.87018	0.000108753	0.000870083	AAEL006338	sulfotransferase (sult) [Source:VB Community Annotation]
LOC5567692	533.112	0.996175	0.257457	3.86928	0.000109157	0.000872839	AAEL018114
LOC5567196	21.4852	-2.29147	0.592257	-3.86904	0.000109264	0.000872996	AAEL000886
LOC5573759	101.956	-2.38479	0.616388	-3.86897	0.000109294	0.000872996	AAEL000268	lipase [Source:VB Community Annotation]
LOC5569149	22.7606	-1.82051	0.470691	-3.86773	0.000109851	0.000876967	AAEL022465
LOC5577142	8475.24	1.67917	0.434192	3.86736	0.000110021	0.000877847	AAEL003112
LOC110680772	38.0067	-1.35263	0.349872	-3.86609	0.000110596	0.000881961	AAEL027615
LOC5577485	256.395	-0.734292	0.189945	-3.86582	0.000110715	0.000882438	AAEL025150
LOC5567682	91.478	-2.46339	0.637267	-3.86555	0.000110837	0.000882896	AAEL006253
LOC5567053	3390.67	0.579349	0.149879	3.86543	0.000110893	0.000882896	AAEL005772	odorant binding protein OBP22 [Source:VB Community Annotation]	OBP22
LOC5572517	352.278	1.12882	0.292108	3.8644	0.000111364	0.000886168	AAEL009839	Nuclear cap-binding protein subunit 1 (80 kDa nuclear cap-binding protein)(NCBP 80 kDa subunit)(CBP80) [Source:VB Community Annotation]	Cbp80
LOC5575393	10.8872	-4.72086	1.22181	-3.86381	0.000111631	0.000887816	AAEL011797	venom allergen [Source:VB Community Annotation]
LOC5568116	150.668	1.72131	0.445636	3.86258	0.000112194	0.000891816	AAEL006542	retinoid-inducible serine carboxypeptidase (serine carboxypeptidase [Source:VB Community Annotation]
LOC5567155	72.7466	0.966642	0.250427	3.85998	0.000113397	0.000900889	AAEL005909	splicing factor SC35, putative [Source:VB Community Annotation]
LOC110675555	3.93522	-5.7189	1.48166	-3.85979	0.000113486	0.000901115	AAEL020767
LOC5578556	385.589	2.06297	0.534557	3.85921	0.000113754	0.000902755	AAEL003568	threonine dehydratase/deaminase [Source:VB Community Annotation]
LOC5570148	623.165	0.754004	0.195396	3.85886	0.000113918	0.000903573	AAEL008134	ABC transporter [Source:VB Community Annotation]
LOC5568752	177.172	1.00487	0.260417	3.85867	0.000114004	0.000903771	AAEL007105
LOC5570533	1939.61	-0.3844	0.099667	-3.85684	0.000114862	0.000910082	AAEL028185
LOC5569921	663.405	-0.652131	0.169094	-3.85663	0.000114963	0.000910393	AAEL008021	specifically Rac-associated protein, putative [Source:VB Community Annotation]
LOC5574358	1458.28	-0.512893	0.133019	-3.85578	0.00011536	0.000913047	AAEL002358
LOC5564562	1098.16	0.848559	0.220097	3.85538	0.000115548	0.000914051	AAEL004305
LOC5571316	320.131	-0.924142	0.239836	-3.85322	0.000116573	0.000921662	AAEL008940	chaoptin [Source:VB Community Annotation]
LOC5567364	465.212	-1.09299	0.283793	-3.85136	0.000117466	0.000928223	AAEL006035
LOC5567813	1000.99	0.624299	0.162182	3.84938	0.000118418	0.000935251	AAEL000984
LOC5569882	183.327	-1.43764	0.373506	-3.84904	0.000118584	0.00093606	AAEL026517
LOC5575814	137.736	1.6002	0.41596	3.84701	0.000119568	0.000943322	AAEL012086	leucine-rich immune protein (Long) [Source:VB Community Annotation]	LRIM1
LOC5571764	2178.25	0.709983	0.184573	3.84663	0.000119755	0.000944296	AAEL009294	phosphatidylinositol 4-kinase [Source:VB Community Annotation]
LOC5568230	273.315	1.1058	0.287565	3.8454	0.000120356	0.000948526	AAEL006676
LOC5573513	54.2581	-1.22703	0.319148	-3.84471	0.000120693	0.000950677	AAEL010556
LOC5574376	5900.9	0.651502	0.169481	3.84409	0.000120999	0.00095258	AAEL018211
LOC5571540	62.2912	1.13698	0.295796	3.84378	0.000121155	0.000953295	AAEL009127	cytochrome P450 [Source:VB Community Annotation]	CYP6M11
LOC5565282	219.055	-1.12461	0.292663	-3.84269	0.000121695	0.00095704	AAEL014797	acyl-coa dehydrogenase [Source:VB Community Annotation]
LOC5570517	206.407	0.842413	0.219238	3.84246	0.000121809	0.000957424	AAEL001439	mitochondrial ribosomal protein, L22, putative [Source:VB Community Annotation]	mRpL22
LOC5566085	29.0255	-2.16022	0.562295	-3.84179	0.000122138	0.000959499	AAEL005164
LOC5577064	177.737	-0.720672	0.18763	-3.84091	0.000122579	0.000962451	AAEL003097	calmodulin-binding transcription activator (camta), drome [Source:VB Community Annotation]
LOC5571658	215.755	-0.98555	0.256612	-3.84063	0.00012272	0.000963042	AAEL001666
LOC5570402	13.477	-3.6856	0.959874	-3.83968	0.000123197	0.000966276	AAEL021032
LOC110680233	120.354	1.08508	0.282737	3.83777	0.000124156	0.000973281	AAEL022169
LOC5573287	23.1394	-3.31035	0.862769	-3.83689	0.0001246	0.000976244	AAEL010366	glucosyl/glucuronosyl transferases [Source:VB Community Annotation]
LOC5578809	246.866	-0.709927	0.185149	-3.83436	0.000125893	0.000985854	AAEL013847	diacylglycerol kinase, zeta, iota [Source:VB Community Annotation]
LOC5565509	281.802	-0.795082	0.207393	-3.83371	0.000126227	0.000987939	AAEL004825	potassium-dependent sodium-calcium exchanger, putative [Source:VB Community Annotation]
LOC5564163	1087.13	0.87648	0.228711	3.83227	0.000126967	0.000993208	AAEL004138	signal peptide peptidase [Source:VB Community Annotation]
LOC5578481	32.4571	2.65322	0.692513	3.83129	0.000127473	0.000996641	AAEL000495	glutathione peroxidase [Source:VB Community Annotation]	GPXH3
LOC5575301	870.878	-0.811057	0.211704	-3.83109	0.000127577	0.000996926	AAEL023523
LOC5570058	259.102	-0.874343	0.228311	-3.82962	0.000128342	0.00100237	AAEL000217	serine/threonine protein kinase [Source:VB Community Annotation]
LOC5565804	790.203	0.736531	0.192344	3.82925	0.000128536	0.00100335	AAEL005008	aquaporin [Source:VB Community Annotation]
LOC5564314	308.294	0.643965	0.168281	3.82672	0.000129864	0.00101319	AAEL000581
LOC5564164	3901.4	1.24837	0.3263	3.82584	0.000130326	0.00101625	AAEL024144
LOC5565513	2721.29	-0.802983	0.209959	-3.82447	0.000131053	0.00102138	AAEL014863	glycogenin [Source:VB Community Annotation]
LOC5565048	1624.27	-0.726003	0.189841	-3.82426	0.000131165	0.00102172	AAEL004567	fermitin, putative [Source:VB Community Annotation]
LOC5570773	4816.66	-2.39561	0.626753	-3.82225	0.000132238	0.00102945	AAEL008528	protein tyrosine phosphatase n11 (shp2) [Source:VB Community Annotation]
LOC5579155	1492.06	0.926886	0.242507	3.8221	0.000132321	0.00102945	AAEL023676
LOC5567750	3.55225	-5.57099	1.45761	-3.82201	0.000132366	0.00102945	AAEL000139	odorant binding protein OBP5 [Source:VB Community Annotation]	OBP5
LOC5579005	743.926	1.53395	0.401464	3.82089	0.00013297	0.0010336	AAEL022914
LOC23687614	546.803	0.586849	0.153604	3.82054	0.000133159	0.00103452	AAEL017194
LOC5572314	1044.44	-0.78533	0.205563	-3.82038	0.000133247	0.00103466	AAEL022930
LOC5564147	503.848	0.494056	0.129336	3.81994	0.000133486	0.00103597	AAEL014326	out at first protein [Source:VB Community Annotation]
LOC5576484	62.4535	1.03734	0.271602	3.81933	0.000133817	0.001038	AAEL002891
LOC5563609	64.2569	1.90116	0.497972	3.81781	0.000134639	0.00104383	AAEL000087	macroglobulin/complement [Source:VB Community Annotation]
LOC5576177	24.188	-1.78239	0.467112	-3.81576	0.000135763	0.00105198	AAEL019810
LOC5577374	3266.69	1.04535	0.273971	3.81557	0.00013587	0.00105226	AAEL000464
LOC5568137	33.6137	-2.56359	0.671972	-3.81502	0.000136172	0.00105405	AAEL015432	trypsin, putative [Source:VB Community Annotation]
LOC5570841	260.855	-0.838769	0.219876	-3.81473	0.000136332	0.00105473	AAEL008617
LOC5563606	15.7165	-2.42195	0.635282	-3.81241	0.000137618	0.00106413	AAEL000035	odorant binding protein (Obp57) [Source:VB Community Annotation]	OBP57
LOC110678740	4.83409	5.44973	1.42973	3.81172	0.000138002	0.00106654	AAEL021613
LOC110674177	99.8152	-1.54832	0.406392	-3.80992	0.000139014	0.0010738	AAEL019557
LOC5564174	92.3458	-1.14407	0.300324	-3.80944	0.000139283	0.00107531	AAEL013042
LOC5579494	715.005	0.64101	0.16838	3.80692	0.000140707	0.00108574	AAEL015271	rac GTPase [Source:VB Community Annotation]
LOC5570159	1444.36	-0.599507	0.15749	-3.80664	0.000140865	0.00108639	AAEL008131	cytidylate kinase [Source:VB Community Annotation]
LOC5572212	741.512	0.775292	0.203714	3.80579	0.00014135	0.00108956	AAEL009616	cadherin [Source:VB Community Annotation]
LOC5567705	265.755	1.45838	0.383297	3.80482	0.00014191	0.00109318	AAEL006279
LOC5578755	207.167	-2.07636	0.545734	-3.80472	0.000141968	0.00109318	AAEL003683	tRNA pseudouridine synthase [Source:UniProtKB/TrEMBL;Acc:Q17EU6]
LOC110674037	118.833	-0.913959	0.240242	-3.80433	0.00014219	0.00109432	AAEL013737	axonemal inner arm dynein light chain [Source:VB Community Annotation]
LOC110675150	2283.82	0.412281	0.108426	3.8024	0.000143299	0.00110228	AAEL020753
LOC5573635	585.4	1.30541	0.343641	3.79875	0.000145426	0.00111806	AAEL010623
LOC5578027	382.657	-0.82062	0.216107	-3.79729	0.000146287	0.00112409	AAEL003366	DNA-J, putative [Source:VB Community Annotation]
LOC110674085	14.3201	-2.25475	0.593966	-3.79609	0.000146994	0.00112871	AAEL021443
LOC5575988	864.128	-0.575919	0.151717	-3.79601	0.000147041	0.00112871	AAEL002769	homeobox protein prospero/prox-1 [Source:VB Community Annotation]
LOC5568244	190.221	-0.747364	0.196986	-3.794	0.000148238	0.00113731	AAEL022611
LOC5580309	544.388	1.30106	0.343094	3.79215	0.000149348	0.00114523	AAEL002999	GTPase_rho [Source:VB Community Annotation]
LOC5574369	122.948	0.899514	0.237262	3.79122	0.000149909	0.00114894	AAEL011087	DNA-directed RNA polymerase II [Source:VB Community Annotation]
LOC5572784	105.78	-1.04971	0.276918	-3.7907	0.000150226	0.0011504	AAEL001899	juvenile hormone-inducible protein, putative [Source:VB Community Annotation]
LOC110681313	134.714	0.780983	0.206029	3.79065	0.000150256	0.0011504	AAEL020938
LOC5568859	969.691	-0.592411	0.156371	-3.7885	0.000151558	0.00115939	AAEL018133
LOC110674014	64.6538	1.0553	0.278556	3.78846	0.000151587	0.00115939	AAEL023474
LOC5577251	12.361	-2.24594	0.593009	-3.78736	0.000152256	0.00116382	AAEL013109	glutamate transporter [Source:VB Community Annotation]
LOC5578008	318.782	0.657245	0.173541	3.78725	0.000152323	0.00116382	AAEL003377	signal recognition particle [Source:VB Community Annotation]
LOC5576082	1508.4	0.62613	0.165443	3.78456	0.000153983	0.00117538	AAEL012312	proliferation-associated 2g4 (pa2g4/ebp1) [Source:VB Community Annotation]
LOC5567055	40558.7	1.8063	0.477284	3.78454	0.000153996	0.00117538	AAEL005779	CRAL/TRIO domain-containing protein [Source:VB Community Annotation]
LOC110676892	37.5496	1.25931	0.332832	3.78361	0.000154567	0.00117913	AAEL022483
LOC5565224	2366.85	0.521881	0.137966	3.78267	0.000155157	0.00118302	AAEL004668	Septin [Source:UniProtKB/TrEMBL;Acc:A0A1S4F8E6]
LOC5564970	341.117	-1.14302	0.302323	-3.78078	0.00015634	0.00119143	AAEL004533	GPCR Metabotropic glutamate Family [Source:VB Community Annotation]	GPRMGL2
LOC5568291	131.855	0.872367	0.230784	3.78001	0.000156823	0.00119393	AAEL006748	ss-DNA binding protein 12RNP2 precursor, putative [Source:VB Community Annotation]
LOC5578730	267.066	-0.577729	0.152838	-3.78	0.00015683	0.00119393	AAEL013839
LOC110679339	3.75534	-5.63245	1.49047	-3.77899	0.000157467	0.00119816	AAEL024577
LOC5570274	633.237	1.04595	0.276869	3.77778	0.000158236	0.00120339	AAEL008219	elongase, putative [Source:VB Community Annotation]
LOC5572396	17.9679	-1.73487	0.45928	-3.77738	0.000158488	0.00120469	AAEL009792	leucine-rich immune protein (Coil-less) [Source:VB Community Annotation]	LRIM25
LOC5576518	199.609	1.56002	0.413007	3.77723	0.000158581	0.00120478	AAEL012578	Phosphoserine aminotransferase [Source:UniProtKB/TrEMBL;Acc:Q1HRL1]
LOC5567287	244.864	1.3409	0.355014	3.77704	0.000158701	0.00120507	AAEL005951	lipid storage droplets surface binding protein [Source:VB Community Annotation]
LOC5572022	23.7979	-1.44523	0.382677	-3.77664	0.000158959	0.00120641	AAEL000243	leucine-rich transmembrane protein [Source:VB Community Annotation]
LOC5576722	7286.43	-0.993508	0.263141	-3.77557	0.000159643	0.00121097	AAEL027938
LOC110675613	771.608	-0.545195	0.144414	-3.77524	0.000159856	0.00121173	AAEL021473
LOC5577775	15.0487	3.78312	1.00213	3.77508	0.000159957	0.00121173	AAEL003299
LOC5579045	276.8	0.756892	0.2005	3.77503	0.000159989	0.00121173	AAEL013980	glutaredoxin, putative [Source:VB Community Annotation]
LOC5574970	69.2639	-0.886792	0.234932	-3.77467	0.000160217	0.0012123	AAEL027527
LOC5580174	336.339	1.10943	0.293916	3.77466	0.000160229	0.0012123	AAEL002559
LOC23687709	29.8796	-1.30607	0.346145	-3.7732	0.000161166	0.00121878	AAEL017289
LOC5574917	847.782	0.735242	0.194925	3.77193	0.000161989	0.00122382	AAEL011522	MRAS2, putative [Source:VB Community Annotation]
LOC5575585	2146.01	0.449573	0.11919	3.77192	0.000161999	0.00122382	AAEL019950
LOC5573280	232.744	-2.3001	0.609914	-3.77118	0.000162477	0.0012268	AAEL010367	aldehyde oxidase [Source:VB Community Annotation]
LOC5578507	46.8712	3.51109	0.931438	3.76954	0.000163549	0.00123427	AAEL013715	trypsin [Source:VB Community Annotation]
LOC5579875	683.224	-0.838089	0.222423	-3.768	0.000164562	0.00124128	AAEL005978
LOC5565963	23.5134	-1.51928	0.403475	-3.76547	0.000166234	0.00125325	AAEL005049	heterogeneous nuclear ribonucleoprotein [Source:VB Community Annotation]
LOC5574050	2479.23	1.08945	0.289552	3.76254	0.000168195	0.00126703	AAEL010898
LOC5567293	195.55	-0.771601	0.205077	-3.76249	0.000168233	0.00126703	AAEL005943	ser/thr kinase stk11 (lkb1) [Source:VB Community Annotation]
LOC110678059	624.022	0.921978	0.245072	3.76207	0.000168512	0.00126848	AAEL009660
LOC5564940	791.257	1.77245	0.471318	3.76062	0.000169495	0.00127523	AAEL027518
LOC5579094	104.319	3.14278	0.835768	3.76036	0.000169672	0.00127591	AAEL003832	defensin anti-microbial peptide [Source:VB Community Annotation]	DEFC
LOC5570829	237.463	-0.713267	0.189692	-3.76013	0.000169825	0.00127626	AAEL008603
LOC5569968	14717	0.433136	0.115195	3.76003	0.000169891	0.00127626	AAEL020092
LOC5573557	1104.57	0.604808	0.160871	3.75958	0.000170198	0.00127791	AAEL022931
LOC110678383	309.697	-0.630023	0.167683	-3.75722	0.000171808	0.00128935	AAEL027120
LOC5577717	592.256	0.69088	0.183894	3.75695	0.000171995	0.00129009	AAEL013341	lethal(2)essential for life protein, l2efl [Source:VB Community Annotation]
LOC5563631	1495.76	1.69854	0.452185	3.75629	0.000172454	0.00129288	AAEL000098
LOC5566699	519.527	-0.646022	0.172025	-3.75539	0.000173072	0.00129685	AAEL019458
LOC5567341	355.558	0.717984	0.191239	3.75439	0.000173766	0.0013014	AAEL006011
LOC5570915	90.8772	0.899194	0.239529	3.75401	0.000174026	0.00130268	AAEL001506	U3 small nucleolar ribonucleoprotein protein MPP10 [Source:UniProtKB/TrEMBL;Acc:A0A1S4EYY5]
LOC5577239	61.3476	1.01792	0.271199	3.75341	0.000174442	0.00130513	AAEL003141
LOC110676286	40.851	-1.39316	0.371292	-3.7522	0.00017529	0.00131081	AAEL025652
LOC5571369	313.263	1.56294	0.41659	3.75174	0.000175611	0.00131255	AAEL008969	adult cuticle protein, putative [Source:VB Community Annotation]
LOC5571789	3044.92	0.465056	0.123968	3.75141	0.000175843	0.00131362	AAEL009317	rab11 [Source:VB Community Annotation]
LOC5569864	531.791	0.468273	0.124839	3.75101	0.000176124	0.00131505	AAEL007944
LOC5569008	398.138	1.19087	0.317622	3.74934	0.000177298	0.00132315	AAEL007299	Cadherin, putative [Source:UniProtKB/TrEMBL;Acc:A0A1S4FG21]
LOC5568773	537.956	0.77774	0.207443	3.74918	0.000177416	0.00132336	AAEL019800
LOC5574417	493.75	1.49498	0.398835	3.74837	0.000177991	0.00132698	AAEL027602
LOC5579865	515.168	-0.910141	0.243161	-3.74296	0.000181865	0.00135518	AAEL005977	chondroitin 4-sulfotransferase [Source:VB Community Annotation]
LOC5567295	9.27668	-3.36203	0.898574	-3.74151	0.000182916	0.00136232	AAEL015326	lipase 1 precursor [Source:VB Community Annotation]
LOC5563869	962.485	-2.69395	0.720226	-3.74043	0.000183707	0.00136693	AAEL023989
LOC5578278	253.693	-0.583642	0.156037	-3.74041	0.00018372	0.00136693	AAEL003495
LOC5578281	2628.77	-0.877255	0.234544	-3.74026	0.000183832	0.00136707	AAEL013600	integrin alpha-ps [Source:VB Community Annotation]
LOC5571605	171.754	-0.69796	0.186626	-3.73989	0.000184099	0.00136837	AAEL009191	adenosine deaminase [Source:VB Community Annotation]
LOC5567447	303.02	-0.74967	0.200466	-3.73964	0.000184281	0.00136904	AAEL006095	Gelsolin precursor [Source:VB Community Annotation]
LOC23687653	581.865	0.787032	0.210488	3.73908	0.000184693	0.00137141	AAEL019909
LOC110674591	17.6439	-1.78336	0.477146	-3.73756	0.000185814	0.00137904	AAEL020930
LOC110675918	38.3959	-1.17305	0.313972	-3.73616	0.000186852	0.00138605	AAEL025164
LOC5569705	164.962	-0.759219	0.203297	-3.73452	0.00018807	0.00139438	AAEL007858	ran GTPase-activating protein [Source:VB Community Annotation]
LOC5571583	1783.89	-0.612802	0.164339	-3.72888	0.000192329	0.00142524	AAEL020822
LOC5568975	309.89	-0.621403	0.166691	-3.72787	0.000193108	0.00142973	AAEL007256	DNA helicase recq1 [Source:VB Community Annotation]
LOC5574121	477.164	0.920172	0.246838	3.72784	0.000193128	0.00142973	AAEL010924	ca-activated cl channel protein [Source:VB Community Annotation]
LOC5565741	43.3882	-1.04773	0.281069	-3.72764	0.000193279	0.00143013	AAEL004967	myo inositol monophosphatase [Source:VB Community Annotation]
LOC5577932	26.0973	-1.3587	0.364511	-3.72747	0.000193415	0.00143042	AAEL026966
LOC5572898	245.541	-0.727845	0.195337	-3.72609	0.00019447	0.0014375	AAEL010097
[truncated: 17,262 more rows]

## Sheet: GO Enrichment BP
GO Enrichment BP
GO.ID	Term	Annotated	Significant	Expected	weight01KS
GO:0007602	phototransduction	10	10	3.35	3.1e-08
GO:0018298	protein-chromophore linkage	10	9	3.35	7.4e-07
GO:0015991	ATP hydrolysis coupled proton transport	17	14	5.7	7.6e-07
GO:0007601	visual perception	16	13	5.36	1.6e-05
GO:0006508	proteolysis	683	254	228.83	0.0001
GO:0007017	microtubule-based process	128	56	42.88	0.00013
GO:0055085	transmembrane transport	564	238	188.96	0.00033
GO:0003341	cilium movement	10	8	3.35	0.00047
GO:0006094	gluconeogenesis	10	7	3.35	0.00278
GO:0060285	cilium-dependent cell motility	5	5	1.68	0.00283
GO:0046653	tetrahydrofolate metabolic process	7	6	2.35	0.0032
GO:0007010	cytoskeleton organization	118	51	39.53	0.00529
GO:0071805	potassium ion transmembrane transport	44	19	14.74	0.00558
GO:0044262	cellular carbohydrate metabolic process	40	21	13.4	0.00618
GO:0055114	oxidation-reduction process	691	232	231.51	0.00634
GO:0034220	ion transmembrane transport	250	107	83.76	0.00655
GO:0070286	axonemal dynein complex assembly	10	7	3.35	0.00844
GO:0048511	rhythmic process	18	7	6.03	0.00864
GO:0005975	carbohydrate metabolic process	195	85	65.33	0.00906
GO:0007156	homophilic cell adhesion via plasma memb...	23	13	7.71	0.00991
GO:0098656	anion transmembrane transport	29	15	9.72	0.01329
GO:0006801	superoxide metabolic process	10	7	3.35	0.01713
GO:0022008	neurogenesis	30	14	10.05	0.01751
GO:0007018	microtubule-based movement	61	29	20.44	0.01916
GO:0007600	sensory perception	58	21	19.43	0.01969
GO:0006730	one-carbon metabolic process	11	7	3.69	0.02037
GO:0015867	ATP transport	18	9	6.03	0.02163
GO:0006869	lipid transport	55	17	18.43	0.02446
GO:0007281	germ cell development	10	4	3.35	0.02666
GO:0055072	iron ion homeostasis	12	5	4.02	0.02747
GO:1990542	mitochondrial transmembrane transport	6	4	2.01	0.02886
GO:0006544	glycine metabolic process	6	3	2.01	0.02932
GO:0002224	toll-like receptor signaling pathway	9	4	3.02	0.03033
GO:1901071	glucosamine-containing compound metaboli...	47	17	15.75	0.03105
GO:0042398	cellular modified amino acid biosyntheti...	10	7	3.35	0.03134
GO:0006631	fatty acid metabolic process	59	25	19.77	0.03448
GO:0009790	embryo development	6	4	2.01	0.03472
GO:0045047	protein targeting to ER	11	7	3.69	0.03536
GO:0006520	cellular amino acid metabolic process	130	49	43.55	0.03614
GO:0048589	developmental growth	12	7	4.02	0.03623
GO:0006612	protein targeting to membrane	12	8	4.02	0.03759
GO:0009611	response to wounding	11	7	3.69	0.03846
GO:0006139	nucleobase-containing compound metabolic...	1278	311	428.18	0.0394
GO:0008299	isoprenoid biosynthetic process	15	9	5.03	0.03949
GO:0080134	regulation of response to stress	17	7	5.7	0.04022
GO:0009190	cyclic nucleotide biosynthetic process	22	8	7.37	0.04219
GO:0006720	isoprenoid metabolic process	18	12	6.03	0.04238
GO:0051128	regulation of cellular component organiz...	64	19	21.44	0.0432
GO:0007015	actin filament organization	35	13	11.73	0.04499
GO:0015718	monocarboxylic acid transport	11	6	3.69	0.0461
GO:0032956	regulation of actin cytoskeleton organiz...	29	9	9.72	0.04763
GO:0007155	cell adhesion	78	32	26.13	0.04772
GO:0006084	acetyl-CoA metabolic process	11	6	3.69	0.05058
GO:1902476	chloride transmembrane transport	11	5	3.69	0.05232
GO:0009081	branched-chain amino acid metabolic proc...	7	4	2.35	0.05233
GO:0007399	nervous system development	45	23	15.08	0.05295
GO:0070887	cellular response to chemical stimulus	66	24	22.11	0.05325
GO:0010951	negative regulation of endopeptidase act...	41	18	13.74	0.05382
GO:0048468	cell development	34	15	11.39	0.05568
GO:0048666	neuron development	22	9	7.37	0.05632
GO:0045185	maintenance of protein location	5	4	1.68	0.05706
GO:0065002	intracellular protein transmembrane tran...	16	5	5.36	0.05888
GO:0031327	negative regulation of cellular biosynth...	53	11	17.76	0.05889
GO:0007154	cell communication	653	232	218.78	0.05927
GO:0030001	metal ion transport	150	60	50.26	0.05943
GO:0098771	inorganic ion homeostasis	27	12	9.05	0.06468
GO:0055080	cation homeostasis	27	12	9.05	0.06468
GO:0044265	cellular macromolecule catabolic process	128	25	42.88	0.066
GO:0007219	Notch signaling pathway	15	6	5.03	0.06748
GO:0044275	cellular carbohydrate catabolic process	6	4	2.01	0.06751
GO:0006563	L-serine metabolic process	6	4	2.01	0.06763
GO:0030154	cell differentiation	61	30	20.44	0.06792
GO:0050482	arachidonic acid secretion	8	4	2.68	0.06802
GO:0006751	glutathione catabolic process	7	3	2.35	0.06908
GO:0006366	transcription from RNA polymerase II pro...	172	41	57.63	0.06994
GO:0043603	cellular amide metabolic process	334	98	111.9	0.07091
GO:0042325	regulation of phosphorylation	35	12	11.73	0.07316
GO:0050896	response to stimulus	886	297	296.84	0.07445
GO:0030522	intracellular receptor signaling pathway	8	4	2.68	0.0746
GO:0032940	secretion by cell	27	11	9.05	0.07478
GO:0042454	ribonucleoside catabolic process	6	4	2.01	0.07519
GO:0006165	nucleoside diphosphate phosphorylation	16	7	5.36	0.07832
GO:0006739	NADP metabolic process	8	5	2.68	0.07862
GO:0019674	NAD metabolic process	7	3	2.35	0.07877
GO:0019359	nicotinamide nucleotide biosynthetic pro...	7	3	2.35	0.07877
GO:0032787	monocarboxylic acid metabolic process	87	37	29.15	0.07988
GO:0006241	CTP biosynthetic process	6	3	2.01	0.08001
GO:0006629	lipid metabolic process	290	100	97.16	0.08064
GO:0007186	G-protein coupled receptor signaling pat...	155	58	51.93	0.08136
GO:0018200	peptidyl-glutamic acid modification	7	3	2.35	0.08357
GO:0006334	nucleosome assembly	14	4	4.69	0.08537
GO:0042742	defense response to bacterium	6	3	2.01	0.08549
GO:0006259	DNA metabolic process	204	39	68.35	0.08596
GO:0046131	pyrimidine ribonucleoside metabolic proc...	11	5	3.69	0.0907
GO:0043244	regulation of protein complex disassembl...	11	5	3.69	0.09126
GO:0051130	positive regulation of cellular componen...	22	7	7.37	0.0914
GO:0090407	organophosphate biosynthetic process	152	41	50.93	0.09182
GO:0000027	ribosomal large subunit assembly	5	3	1.68	0.09791
GO:0032012	regulation of ARF protein signal transdu...	6	2	2.01	0.09852
GO:0008535	respiratory chain complex IV assembly	8	4	2.68	0.0988
GO:0051056	regulation of small GTPase mediated sign...	24	10	8.04	0.09901
GO:0050793	regulation of developmental process	9	5	3.02	0.1012
GO:0035235	ionotropic glutamate receptor signaling ...	14	7	4.69	0.10251
GO:0065008	regulation of biological quality	156	59	52.27	0.10378
GO:0045010	actin nucleation	15	3	5.03	0.10539
GO:0031401	positive regulation of protein modificat...	17	6	5.7	0.10756
GO:0032270	positive regulation of cellular protein ...	26	10	8.71	0.11163
GO:0042246	tissue regeneration	8	4	2.68	0.11175
GO:0070588	calcium ion transmembrane transport	27	13	9.05	0.11543
GO:0045860	positive regulation of protein kinase ac...	9	4	3.02	0.11699
GO:0006448	regulation of translational elongation	7	5	2.35	0.11716
GO:0035282	segmentation	5	3	1.68	0.11782
GO:0019430	removal of superoxide radicals	7	4	2.35	0.11973
GO:0046034	ATP metabolic process	52	9	17.42	0.12056
GO:0018022	peptidyl-lysine methylation	18	4	6.03	0.12075
GO:0018208	peptidyl-proline modification	30	8	10.05	0.12179
GO:0046164	alcohol catabolic process	13	8	4.36	0.12183
GO:0044242	cellular lipid catabolic process	19	7	6.37	0.12214
GO:0006816	calcium ion transport	37	19	12.4	0.12284
GO:1902600	hydrogen ion transmembrane transport	51	23	17.09	0.12487
GO:0007266	Rho protein signal transduction	11	7	3.69	0.12675
GO:0043087	regulation of GTPase activity	46	15	15.41	0.12855
GO:0045087	innate immune response	25	12	8.38	0.13006
GO:1901070	guanosine-containing compound biosynthet...	5	3	1.68	0.13086
GO:0006633	fatty acid biosynthetic process	42	17	14.07	0.13177
GO:0001505	regulation of neurotransmitter levels	9	5	3.02	0.13193
GO:0021700	developmental maturation	5	3	1.68	0.1323
GO:0005996	monosaccharide metabolic process	35	16	11.73	0.13603
GO:0042219	cellular modified amino acid catabolic p...	9	5	3.02	0.13658
GO:0016055	Wnt signaling pathway	30	11	10.05	0.13685
GO:0071407	cellular response to organic cyclic comp...	9	2	3.02	0.13686
GO:0010035	response to inorganic substance	9	6	3.02	0.13876
GO:0030036	actin cytoskeleton organization	53	24	17.76	0.14275
GO:0009070	serine family amino acid biosynthetic pr...	9	5	3.02	0.14277
GO:0046174	polyol catabolic process	11	6	3.69	0.14339
GO:0006555	methionine metabolic process	8	4	2.68	0.1452
GO:0043044	ATP-dependent chromatin remodeling	8	2	2.68	0.14588
GO:0006323	DNA packaging	22	8	7.37	0.14904
GO:0050906	detection of stimulus involved in sensor...	20	3	6.7	0.15029
GO:0098657	import into cell	36	15	12.06	0.15043
GO:0009605	response to external stimulus	38	22	12.73	0.15087
GO:0072528	pyrimidine-containing compound biosynthe...	15	5	5.03	0.15154
GO:0035082	axoneme assembly	11	8	3.69	0.15212
GO:0046058	cAMP metabolic process	7	3	2.35	0.15945
GO:0007271	synaptic transmission, cholinergic	12	5	4.02	0.15977
GO:0030837	negative regulation of actin filament po...	10	4	3.35	0.16044
GO:0034655	nucleobase-containing compound catabolic...	60	19	20.1	0.16075
GO:0006012	galactose metabolic process	6	2	2.01	0.16227
GO:0048519	negative regulation of biological proces...	229	62	76.72	0.16232
GO:0006417	regulation of translation	39	12	13.07	0.16671
GO:0007610	behavior	8	5	2.68	0.16704
GO:0006487	protein N-linked glycosylation	6	4	2.01	0.16716
GO:0000302	response to reactive oxygen species	8	5	2.68	0.16757
GO:0002009	morphogenesis of an epithelium	8	3	2.68	0.16822
GO:0006541	glutamine metabolic process	10	5	3.35	0.16983
GO:0046434	organophosphate catabolic process	25	11	8.38	0.17052
GO:0050877	nervous system process	59	22	19.77	0.17052
GO:0071806	protein transmembrane transport	17	6	5.7	0.17121
GO:0042559	pteridine-containing compound biosynthet...	6	4	2.01	0.17259
GO:0045017	glycerolipid biosynthetic process	33	4	11.06	0.17271
GO:0006091	generation of precursor metabolites and ...	99	26	33.17	0.17633
GO:0018108	peptidyl-tyrosine phosphorylation	31	12	10.39	0.17638
GO:0032222	regulation of synaptic transmission, cho...	11	4	3.69	0.17745
GO:0030431	sleep	11	4	3.69	0.17745
GO:1903818	positive regulation of voltage-gated pot...	11	4	3.69	0.17745
GO:0006611	protein export from nucleus	13	3	4.36	0.17765
GO:0009084	glutamine family amino acid biosynthetic...	10	3	3.35	0.17828
GO:0046039	GTP metabolic process	5	3	1.68	0.18001
GO:0035601	protein deacylation	6	2	2.01	0.18034
GO:0042157	lipoprotein metabolic process	26	3	8.71	0.1805
GO:0034765	regulation of ion transmembrane transpor...	31	13	10.39	0.18074
GO:0043666	regulation of phosphoprotein phosphatase...	11	3	3.69	0.18149
GO:0098609	cell-cell adhesion	24	14	8.04	0.18327
GO:0032502	developmental process	198	71	66.34	0.18411
GO:0072594	establishment of protein localization to...	43	16	14.41	0.1845
GO:0007163	establishment or maintenance of cell pol...	8	5	2.68	0.18542
GO:0006810	transport	999	377	334.7	0.18606
GO:0140056	organelle localization by membrane tethe...	11	2	3.69	0.18704
GO:0010468	regulation of gene expression	545	148	182.6	0.18834
GO:0006814	sodium ion transport	38	15	12.73	0.18845
GO:0007264	small GTPase mediated signal transductio...	57	22	19.1	0.19065
GO:0006897	endocytosis	35	14	11.73	0.19124
GO:0007229	integrin-mediated signaling pathway	8	2	2.68	0.19365
GO:0045937	positive regulation of phosphate metabol...	14	5	4.69	0.19534
GO:0035304	regulation of protein dephosphorylation	13	4	4.36	0.19544
GO:0006188	IMP biosynthetic process	7	3	2.35	0.19766
GO:0048870	cell motility	8	7	2.68	0.1978
GO:0042060	wound healing	9	5	3.02	0.20052
GO:0048585	negative regulation of response to stimu...	21	5	7.04	0.20067
GO:0060070	canonical Wnt signaling pathway	9	4	3.02	0.20266
GO:0042221	response to chemical	119	41	39.87	0.20287
GO:0044092	negative regulation of molecular functio...	58	23	19.43	0.20305
GO:0006952	defense response	28	13	9.38	0.20357
GO:0044281	small molecule metabolic process	478	174	160.15	0.2036
GO:0043647	inositol phosphate metabolic process	10	6	3.35	0.20512
GO:0046855	inositol phosphate dephosphorylation	6	3	2.01	0.20644
GO:0035194	posttranscriptional gene silencing by RN...	17	6	5.7	0.20933
GO:0060079	excitatory postsynaptic potential	10	6	3.35	0.2103
GO:0009072	aromatic amino acid family metabolic pro...	12	4	4.02	0.21099
GO:0046112	nucleobase biosynthetic process	8	3	2.68	0.21244
GO:0046148	pigment biosynthetic process	21	6	7.04	0.21312
GO:0009066	aspartate family amino acid metabolic pr...	14	7	4.69	0.21374
GO:0007098	centrosome cycle	9	3	3.02	0.21687
GO:0046165	alcohol biosynthetic process	14	8	4.69	0.21737
GO:0006222	UMP biosynthetic process	5	1	1.68	0.2181
GO:0006206	pyrimidine nucleobase metabolic process	5	2	1.68	0.2181
GO:0010638	positive regulation of organelle organiz...	20	5	6.7	0.21834
GO:0016042	lipid catabolic process	49	19	16.42	0.22018
GO:1901136	carbohydrate derivative catabolic proces...	21	10	7.04	0.22151
GO:0048285	organelle fission	33	5	11.06	0.22153
GO:0080090	regulation of primary metabolic process	601	168	201.36	0.22181
GO:0051347	positive regulation of transferase activ...	14	5	4.69	0.22588
GO:0006403	RNA localization	28	7	9.38	0.22622
GO:0070727	cellular macromolecule localization	161	51	53.94	0.22693
GO:0006464	cellular protein modification process	737	223	246.92	0.22744
GO:0002183	cytoplasmic translational initiation	14	1	4.69	0.22817
GO:0030042	actin filament depolymerization	9	3	3.02	0.22834
GO:0034645	cellular macromolecule biosynthetic proc...	967	242	323.98	0.23323
GO:0001510	RNA methylation	40	7	13.4	0.23367
GO:0070972	protein localization to endoplasmic reti...	17	10	5.7	0.23485
GO:0045216	cell-cell junction organization	7	3	2.35	0.23498
GO:0018393	internal peptidyl-lysine acetylation	16	4	5.36	0.23728
GO:0008652	cellular amino acid biosynthetic process	29	13	9.72	0.23781
GO:0007009	plasma membrane organization	5	3	1.68	0.23794
GO:0019722	calcium-mediated signaling	5	2	1.68	0.23949
GO:0018958	phenol-containing compound metabolic pro...	6	2	2.01	0.2395
GO:0006098	pentose-phosphate shunt	6	3	2.01	0.2395
GO:0070507	regulation of microtubule cytoskeleton o...	8	2	2.68	0.23972
GO:0006465	signal peptide processing	6	3	2.01	0.24049
GO:0009166	nucleotide catabolic process	11	5	3.69	0.24093
GO:0006813	potassium ion transport	48	21	16.08	0.24296
GO:0044089	positive regulation of cellular componen...	17	4	5.7	0.24445
GO:0015986	ATP synthesis coupled proton transport	16	2	5.36	0.24492
GO:0044248	cellular catabolic process	248	71	83.09	0.24577
GO:0009653	anatomical structure morphogenesis	41	15	13.74	0.24612
GO:0010628	positive regulation of gene expression	22	8	7.37	0.24748
GO:0031328	positive regulation of cellular biosynth...	31	10	10.39	0.2478
GO:0010557	positive regulation of macromolecule bio...	31	10	10.39	0.2478
GO:0071616	acyl-CoA biosynthetic process	6	4	2.01	0.24991
GO:1901575	organic substance catabolic process	281	88	94.15	0.25046
GO:0009206	purine ribonucleoside triphosphate biosy...	21	4	7.04	0.25051
GO:0023061	signal release	6	3	2.01	0.25267
GO:0050804	modulation of chemical synaptic transmis...	12	5	4.02	0.25281
GO:0006040	amino sugar metabolic process	50	19	16.75	0.25302
GO:0023056	positive regulation of signaling	23	7	7.71	0.25335
GO:0010647	positive regulation of cell communicatio...	23	7	7.71	0.25335
GO:0006575	cellular modified amino acid metabolic p...	27	16	9.05	0.25512
GO:0043648	dicarboxylic acid metabolic process	7	3	2.35	0.25603
GO:0032392	DNA geometric change	31	7	10.39	0.25662
GO:0009056	catabolic process	313	98	104.87	0.25846
GO:1901879	regulation of protein depolymerization	9	3	3.02	0.25973
GO:0051495	positive regulation of cytoskeleton orga...	16	4	5.36	0.2599
GO:1902905	positive regulation of supramolecular fi...	16	4	5.36	0.2599
GO:0009967	positive regulation of signal transducti...	22	6	7.37	0.26058
GO:0042981	regulation of apoptotic process	12	5	4.02	0.26216
GO:0051129	negative regulation of cellular componen...	24	5	8.04	0.26231
GO:0009057	macromolecule catabolic process	142	29	47.58	0.26288
GO:0006760	folic acid-containing compound metabolic...	8	7	2.68	0.26495
GO:0006887	exocytosis	22	8	7.37	0.26634
GO:0010466	negative regulation of peptidase activit...	45	20	15.08	0.26921
GO:0006614	SRP-dependent cotranslational protein ta...	9	5	3.02	0.26945
GO:0006928	movement of cell or subcellular componen...	85	40	28.48	0.26963
GO:0120036	plasma membrane bounded cell projection ...	63	24	21.11	0.27048
GO:0030029	actin filament-based process	54	25	18.09	0.27066
GO:0031329	regulation of cellular catabolic process	11	3	3.69	0.27274
GO:0097435	supramolecular fiber organization	43	15	14.41	0.27415
GO:0009168	purine ribonucleoside monophosphate bios...	33	8	11.06	0.27764
GO:0072593	reactive oxygen species metabolic proces...	15	10	5.03	0.27887
GO:0046173	polyol biosynthetic process	11	6	3.69	0.28064
GO:0032465	regulation of cytokinesis	7	3	2.35	0.28112
GO:0030149	sphingolipid catabolic process	7	2	2.35	0.28152
GO:0051650	establishment of vesicle localization	7	4	2.35	0.28387
GO:0051049	regulation of transport	35	15	11.73	0.28408
GO:0006836	neurotransmitter transport	9	4	3.02	0.28492
GO:0043173	nucleotide salvage	6	3	2.01	0.28524
GO:0009152	purine ribonucleotide biosynthetic proce...	59	17	19.77	0.28612
GO:1901565	organonitrogen compound catabolic proces...	155	39	51.93	0.29025
GO:0000290	deadenylation-dependent decapping of nuc...	6	3	2.01	0.29508
GO:0008272	sulfate transport	10	5	3.35	0.2977
GO:0043462	regulation of ATPase activity	7	3	2.35	0.29902
GO:0045893	positive regulation of transcription, DN...	17	5	5.7	0.30151
GO:0050808	synapse organization	6	1	2.01	0.30234
GO:0009395	phospholipid catabolic process	6	2	2.01	0.30461
GO:0045859	regulation of protein kinase activity	29	10	9.72	0.30492
GO:0016579	protein deubiquitination	36	9	12.06	0.30584
GO:0044270	cellular nitrogen compound catabolic pro...	72	23	24.12	0.30863
GO:0006777	Mo-molybdopterin cofactor biosynthetic p...	5	2	1.68	0.31137
GO:0072527	pyrimidine-containing compound metabolic...	20	9	6.7	0.31299
GO:1903311	regulation of mRNA metabolic process	9	4	3.02	0.31847
GO:0043412	macromolecule modification	816	238	273.39	0.31982
GO:0007205	protein kinase C-activating G-protein co...	6	2	2.01	0.32015
GO:0034637	cellular carbohydrate biosynthetic proce...	9	5	3.02	0.32398
GO:0010033	response to organic substance	43	14	14.41	0.32511
GO:0008610	lipid biosynthetic process	116	37	38.86	0.32594
GO:0090150	establishment of protein localization to...	21	12	7.04	0.32796
GO:0044087	regulation of cellular component biogene...	36	10	12.06	0.32968
GO:0006457	protein folding	48	14	16.08	0.3305
GO:2000112	regulation of cellular macromolecule bio...	479	127	160.48	0.33077
GO:0000288	nuclear-transcribed mRNA catabolic proce...	9	4	3.02	0.33752
GO:0043297	apical junction assembly	5	2	1.68	0.34498
GO:0048731	system development	56	27	18.76	0.34525
GO:0006461	protein complex assembly	99	33	33.17	0.34569
GO:0035023	regulation of Rho protein signal transdu...	9	5	3.02	0.34755
GO:1990748	cellular detoxification	32	13	10.72	0.34851
GO:0012501	programmed cell death	44	18	14.74	0.35008
GO:0006559	L-phenylalanine catabolic process	5	2	1.68	0.3505
GO:0043624	cellular protein complex disassembly	17	7	5.7	0.3532
GO:0009086	methionine biosynthetic process	7	3	2.35	0.35374
GO:0044273	sulfur compound catabolic process	8	4	2.68	0.3553
GO:0000413	protein peptidyl-prolyl isomerization	28	6	9.38	0.35632
GO:0051704	multi-organism process	29	13	9.72	0.36121
GO:0009226	nucleotide-sugar biosynthetic process	8	4	2.68	0.3628
GO:0006479	protein methylation	37	10	12.4	0.36589
GO:0006101	citrate metabolic process	24	7	8.04	0.36786
GO:0046395	carboxylic acid catabolic process	34	12	11.39	0.36957
GO:0043414	macromolecule methylation	78	18	26.13	0.37009
GO:0006368	transcription elongation from RNA polyme...	11	2	3.69	0.3703
GO:0006793	phosphorus metabolic process	693	223	232.18	0.37462
GO:0051276	chromosome organization	173	32	57.96	0.3749
GO:0009225	nucleotide-sugar metabolic process	10	5	3.35	0.37558
GO:0016052	carbohydrate catabolic process	21	10	7.04	0.37563
GO:0048513	animal organ development	13	5	4.36	0.37977
GO:1902358	sulfate transmembrane transport	9	4	3.02	0.38058
GO:1901616	organic hydroxy compound catabolic proce...	15	8	5.03	0.38064
GO:0006955	immune response	29	13	9.72	0.38099
GO:0097164	ammonium ion metabolic process	13	4	4.36	0.38219
GO:0061024	membrane organization	36	9	12.06	0.38606
GO:0034728	nucleosome organization	18	5	6.03	0.3862
GO:0000902	cell morphogenesis	25	10	8.38	0.38665
GO:0044257	cellular protein catabolic process	85	14	28.48	0.39295
GO:0045454	cell redox homeostasis	39	14	13.07	0.39518
GO:0022618	ribonucleoprotein complex assembly	42	9	14.07	0.39762
GO:0051649	establishment of localization in cell	230	69	77.06	0.39827
GO:0006672	ceramide metabolic process	5	1	1.68	0.4045
GO:0022411	cellular component disassembly	21	8	7.04	0.40465
GO:0043085	positive regulation of catalytic activit...	69	21	23.12	0.40602
GO:1901615	organic hydroxy compound metabolic proce...	45	22	15.08	0.40923
GO:0016126	sterol biosynthetic process	5	2	1.68	0.4103
GO:0009108	coenzyme biosynthetic process	41	17	13.74	0.41099
GO:0006662	glycerol ether metabolic process	7	3	2.35	0.41188
GO:0007169	transmembrane receptor protein tyrosine ...	13	6	4.36	0.41779
GO:0007268	chemical synaptic transmission	31	14	10.39	0.41942
GO:0050789	regulation of biological process	1425	447	477.43	0.42221
GO:0097035	regulation of membrane lipid distributio...	8	1	2.68	0.42303
GO:0016310	phosphorylation	404	137	135.36	0.42664
GO:0016125	sterol metabolic process	7	3	2.35	0.42863
GO:0001522	pseudouridine synthesis	13	2	4.36	0.43
GO:0007346	regulation of mitotic cell cycle	19	1	6.37	0.43163
GO:0072330	monocarboxylic acid biosynthetic process	44	18	14.74	0.43309
GO:0009067	aspartate family amino acid biosynthetic...	9	4	3.02	0.43349
GO:0006888	ER to Golgi vesicle-mediated transport	17	6	5.7	0.4337
GO:0043174	nucleoside salvage	6	2	2.01	0.43551
GO:1902115	regulation of organelle assembly	5	1	1.68	0.43676
GO:0006839	mitochondrial transport	23	9	7.71	0.43747
GO:0050794	regulation of cellular process	1338	416	448.28	0.44023
GO:0009311	oligosaccharide metabolic process	8	3	2.68	0.44264
GO:0044249	cellular biosynthetic process	1266	341	424.16	0.44279
GO:0043408	regulation of MAPK cascade	8	1	2.68	0.44559
GO:0005977	glycogen metabolic process	7	4	2.35	0.44747
GO:0007034	vacuolar transport	13	5	4.36	0.44806
GO:0007031	peroxisome organization	9	3	3.02	0.45041
GO:0006468	protein phosphorylation	265	90	88.79	0.45045
GO:0033554	cellular response to stress	157	33	52.6	0.45568
GO:0006811	ion transport	365	149	122.29	0.45717
GO:0044093	positive regulation of molecular functio...	83	26	27.81	0.46083
GO:0006915	apoptotic process	43	17	14.41	0.46101
GO:0000122	negative regulation of transcription fro...	8	1	2.68	0.46192
GO:0051028	mRNA transport	24	6	8.04	0.46282
GO:0098869	cellular oxidant detoxification	31	12	10.39	0.46333
GO:0060271	cilium assembly	38	16	12.73	0.46414
GO:0006829	zinc II ion transport	6	2	2.01	0.46479
GO:0019438	aromatic compound biosynthetic process	654	166	219.11	0.46557
GO:0050684	regulation of mRNA processing	6	3	2.01	0.46572
GO:1901990	regulation of mitotic cell cycle phase t...	13	1	4.36	0.46838
GO:0072329	monocarboxylic acid catabolic process	9	3	3.02	0.47103
GO:0006644	phospholipid metabolic process	96	22	32.16	0.47149
GO:0006085	acetyl-CoA biosynthetic process	5	3	1.68	0.47162
GO:0006415	translational termination	6	2	2.01	0.47163
GO:0051239	regulation of multicellular organismal p...	10	4	3.35	0.47196
GO:0043547	positive regulation of GTPase activity	44	13	14.74	0.47249
GO:0006693	prostaglandin metabolic process	6	3	2.01	0.47365
GO:1901362	organic cyclic compound biosynthetic pro...	673	170	225.48	0.47578
GO:0006260	DNA replication	73	13	24.46	0.47723
GO:0032981	mitochondrial respiratory chain complex ...	5	1	1.68	0.48001
GO:0006270	DNA replication initiation	12	2	4.02	0.48004
GO:0017148	negative regulation of translation	14	4	4.69	0.48232
GO:0080009	mRNA methylation	6	1	2.01	0.48273
GO:0042180	cellular ketone metabolic process	13	3	4.36	0.48301
GO:0060828	regulation of canonical Wnt signaling pa...	8	3	2.68	0.48517
GO:0032543	mitochondrial translation	10	4	3.35	0.48616
GO:0046940	nucleoside monophosphate phosphorylation	5	2	1.68	0.48638
GO:1901606	alpha-amino acid catabolic process	23	7	7.71	0.49194
GO:0009253	peptidoglycan catabolic process	6	2	2.01	0.49313
GO:0007166	cell surface receptor signaling pathway	129	51	43.22	0.49711
GO:0006605	protein targeting	38	15	12.73	0.49969
GO:0000097	sulfur amino acid biosynthetic process	10	4	3.35	0.49984
GO:0009262	deoxyribonucleotide metabolic process	6	0	2.01	0.50204
GO:0006396	RNA processing	289	63	96.83	0.50423
GO:0006493	protein O-linked glycosylation	10	3	3.35	0.50714
GO:0032147	activation of protein kinase activity	5	2	1.68	0.50842
GO:0006874	cellular calcium ion homeostasis	7	3	2.35	0.51035
GO:0009987	cellular process	3982	1209	1334.12	0.51062
GO:1901361	organic cyclic compound catabolic proces...	80	25	26.8	0.51111
GO:0015672	monovalent inorganic cation transport	130	52	43.55	0.51125
GO:0031175	neuron projection development	20	7	6.7	0.51551
GO:0006013	mannose metabolic process	5	2	1.68	0.51629
GO:0009074	aromatic amino acid family catabolic pro...	8	2	2.68	0.5163
GO:0006576	cellular biogenic amine metabolic proces...	13	4	4.36	0.51642
GO:0046031	ADP metabolic process	14	5	4.69	0.51938
GO:0000165	MAPK cascade	13	3	4.36	0.5196
GO:0046033	AMP metabolic process	7	2	2.35	0.51975
GO:0051052	regulation of DNA metabolic process	5	2	1.68	0.52067
GO:0009890	negative regulation of biosynthetic proc...	55	12	18.43	0.52132
GO:0043632	modification-dependent macromolecule cat...	77	12	25.8	0.52508
GO:0032781	positive regulation of ATPase activity	5	2	1.68	0.52604
GO:0044272	sulfur compound biosynthetic process	29	10	9.72	0.5284
GO:0007099	centriole replication	7	2	2.35	0.52957
GO:0051693	actin filament capping	8	2	2.68	0.53
GO:0009083	branched-chain amino acid catabolic proc...	5	2	1.68	0.53212
GO:0003002	regionalization	8	4	2.68	0.53335
GO:0044772	mitotic cell cycle phase transition	14	1	4.69	0.5359
GO:0007029	endoplasmic reticulum organization	5	1	1.68	0.53609
GO:0006096	glycolytic process	12	4	4.02	0.53671
GO:0048583	regulation of response to stimulus	93	28	31.16	0.53877
GO:0048699	generation of neurons	27	11	9.05	0.53903
GO:0000398	mRNA splicing, via spliceosome	53	15	17.76	0.53949
GO:0046854	phosphatidylinositol phosphorylation	14	4	4.69	0.54018
GO:0051260	protein homooligomerization	14	6	4.69	0.5424
GO:0006090	pyruvate metabolic process	17	6	5.7	0.54762
GO:0009755	hormone-mediated signaling pathway	8	3	2.68	0.54818
GO:0015850	organic hydroxy compound transport	11	3	3.69	0.54932
GO:0018065	protein-cofactor linkage	6	1	2.01	0.55165
GO:0033674	positive regulation of kinase activity	10	4	3.35	0.55201
GO:0006171	cAMP biosynthetic process	6	2	2.01	0.55278
GO:0006637	acyl-CoA metabolic process	13	7	4.36	0.55467
GO:0030163	protein catabolic process	92	16	30.82	0.55486
GO:0046907	intracellular transport	219	65	73.37	0.56257
GO:0046128	purine ribonucleoside metabolic process	20	8	6.7	0.56303
GO:0051304	chromosome separation	10	0	3.35	0.56356
GO:0007608	sensory perception of smell	16	2	5.36	0.56374
GO:0050953	sensory perception of light stimulus	18	14	6.03	0.56523
GO:0031047	gene silencing by RNA	36	11	12.06	0.56758
GO:0043604	amide biosynthetic process	300	82	100.51	0.56786
GO:0000387	spliceosomal snRNP assembly	9	3	3.02	0.56828
GO:0010948	negative regulation of cell cycle proces...	12	0	4.02	0.56974
GO:0045862	positive regulation of proteolysis	5	1	1.68	0.57163
GO:0030833	regulation of actin filament polymerizat...	26	7	8.71	0.574
GO:0051321	meiotic cell cycle	16	3	5.36	0.57673
GO:0006402	mRNA catabolic process	33	8	11.06	0.57784
GO:1902533	positive regulation of intracellular sig...	16	4	5.36	0.57879
GO:0040008	regulation of growth	11	4	3.69	0.57941
GO:0006825	copper ion transport	6	2	2.01	0.58159
GO:0032886	regulation of microtubule-based process	9	2	3.02	0.58185
GO:0007283	spermatogenesis	7	3	2.35	0.58215
GO:0009058	biosynthetic process	1322	367	442.92	0.58259
GO:0010817	regulation of hormone levels	6	3	2.01	0.58339
GO:0006066	alcohol metabolic process	33	18	11.06	0.58377
GO:1901987	regulation of cell cycle phase transitio...	14	1	4.69	0.58653
GO:0048878	chemical homeostasis	32	14	10.72	0.58671
GO:0072657	protein localization to membrane	22	12	7.37	0.58851
GO:0007411	axon guidance	19	7	6.37	0.58888
GO:0046129	purine ribonucleoside biosynthetic proce...	10	4	3.35	0.58916
GO:0043101	purine-containing compound salvage	5	2	1.68	0.58968
GO:0034613	cellular protein localization	160	50	53.61	0.58976
GO:0035556	intracellular signal transduction	188	57	62.99	0.59004
GO:0030261	chromosome condensation	7	3	2.35	0.59009
GO:1903506	regulation of nucleic acid-templated tra...	448	115	150.1	0.59101
GO:0048278	vesicle docking	9	1	3.02	0.59426
GO:0042274	ribosomal small subunit biogenesis	8	2	2.68	0.59572
GO:0045787	positive regulation of cell cycle	5	1	1.68	0.60042
GO:0006626	protein targeting to mitochondrion	15	3	5.03	0.60055
GO:0006890	retrograde vesicle-mediated transport, G...	5	2	1.68	0.60131
GO:0046835	carbohydrate phosphorylation	9	4	3.02	0.60161
GO:0019439	aromatic compound catabolic process	78	24	26.13	0.60459
GO:0008283	cell proliferation	9	3	3.02	0.60472
GO:0022402	cell cycle process	67	11	22.45	0.60668
GO:0030162	regulation of proteolysis	51	21	17.09	0.60769
GO:0032268	regulation of cellular protein metabolic...	139	48	46.57	0.60832
GO:0006488	dolichol-linked oligosaccharide biosynth...	9	3	3.02	0.60842
GO:0007218	neuropeptide signaling pathway	27	8	9.05	0.60902
GO:0044237	cellular metabolic process	2800	807	938.11	0.6116
GO:0006325	chromatin organization	102	18	34.17	0.61305
GO:0002376	immune system process	31	14	10.39	0.61311
GO:0042592	homeostatic process	81	29	27.14	0.61326
GO:0044743	protein transmembrane import into intrac...	13	2	4.36	0.61368
GO:0051640	organelle localization	25	8	8.38	0.61513
GO:0097502	mannosylation	15	3	5.03	0.61566
GO:0009628	response to abiotic stimulus	19	12	6.37	0.61596
GO:1901576	organic substance biosynthetic process	1286	354	430.86	0.61599
GO:0009147	pyrimidine nucleoside triphosphate metab...	7	3	2.35	0.6191
GO:0006490	oligosaccharide-lipid intermediate biosy...	10	3	3.35	0.62121
GO:0048609	multicellular organismal reproductive pr...	17	7	5.7	0.62145
GO:0032784	regulation of DNA-templated transcriptio...	5	2	1.68	0.62172
GO:0016311	dephosphorylation	127	39	42.55	0.62262
GO:0006446	regulation of translational initiation	5	2	1.68	0.62306
GO:0031124	mRNA 3'-end processing	6	1	2.01	0.62359
GO:0006950	response to stress	217	58	72.7	0.6238
GO:0006796	phosphate-containing compound metabolic ...	675	213	226.15	0.62566
GO:0007178	transmembrane receptor protein serine/th...	13	5	4.36	0.62618
GO:0006650	glycerophospholipid metabolic process	57	9	19.1	0.62662
GO:0007269	neurotransmitter secretion	5	2	1.68	0.62789
GO:0018130	heterocycle biosynthetic process	664	166	222.47	0.62841
GO:0046903	secretion	36	15	12.06	0.62891
GO:0006904	vesicle docking involved in exocytosis	8	1	2.68	0.62969
GO:0044282	small molecule catabolic process	55	24	18.43	0.63247
GO:0006790	sulfur compound metabolic process	58	20	19.43	0.63263
GO:0009968	negative regulation of signal transducti...	20	4	6.7	0.63275
GO:0043086	negative regulation of catalytic activit...	57	22	19.1	0.63285
GO:0036265	RNA (guanine-N7)-methylation	6	0	2.01	0.63338
GO:0007059	chromosome segregation	33	5	11.06	0.63362
GO:0015833	peptide transport	227	72	76.05	0.6341
GO:0006754	ATP biosynthetic process	18	2	6.03	0.63694
GO:0006099	tricarboxylic acid cycle	23	6	7.71	0.63996
GO:1903047	mitotic cell cycle process	39	3	13.07	0.64235
GO:0023052	signaling	653	230	218.78	0.6441
GO:0072348	sulfur compound transport	11	5	3.69	0.64412
GO:0044271	cellular nitrogen compound biosynthetic ...	949	246	317.95	0.64608
GO:0006406	mRNA export from nucleus	10	1	3.35	0.64694
GO:0019752	carboxylic acid metabolic process	248	96	83.09	0.64715
GO:0006596	polyamine biosynthetic process	10	4	3.35	0.64782
GO:0009416	response to light stimulus	14	11	4.69	0.64797
GO:0000079	regulation of cyclin-dependent protein s...	15	4	5.03	0.64808
GO:0045944	positive regulation of transcription fro...	12	4	4.02	0.6484
GO:0051336	regulation of hydrolase activity	112	41	37.52	0.64993
GO:0051259	protein oligomerization	17	7	5.7	0.65075
GO:0010498	proteasomal protein catabolic process	23	5	7.71	0.65123
GO:0051656	establishment of organelle localization	13	6	4.36	0.6513
GO:0006486	protein glycosylation	74	24	24.79	0.65255
GO:0043248	proteasome assembly	8	3	2.68	0.65283
GO:0046700	heterocycle catabolic process	74	23	24.79	0.65289
GO:0008033	tRNA processing	64	12	21.44	0.65564
GO:0016051	carbohydrate biosynthetic process	25	14	8.38	0.65883
GO:0055082	cellular chemical homeostasis	23	7	7.71	0.65883
GO:0051346	negative regulation of hydrolase activit...	52	22	17.42	0.65992
GO:0008654	phospholipid biosynthetic process	51	8	17.09	0.66135
GO:0015698	inorganic anion transport	26	12	8.71	0.66156
GO:0031109	microtubule polymerization or depolymeri...	8	1	2.68	0.66268
GO:0042254	ribosome biogenesis	81	22	27.14	0.66382
GO:1901663	quinone biosynthetic process	9	2	3.02	0.66421
GO:0017038	protein import	24	6	8.04	0.66461
GO:0031929	TOR signaling	16	2	5.36	0.67245
GO:0071702	organic substance transport	331	104	110.9	0.67747
GO:0032508	DNA duplex unwinding	30	6	10.05	0.6777
GO:0022900	electron transport chain	58	11	19.43	0.67897
GO:0006979	response to oxidative stress	26	10	8.71	0.68206
GO:0006470	protein dephosphorylation	76	20	25.46	0.68354
GO:0033108	mitochondrial respiratory chain complex ...	15	3	5.03	0.684
GO:0045935	positive regulation of nucleobase-contai...	27	7	9.05	0.68461
GO:0023051	regulation of signaling	94	28	31.49	0.68558
GO:0007005	mitochondrion organization	49	10	16.42	0.6858
GO:0006221	pyrimidine nucleotide biosynthetic proce...	14	4	4.69	0.68627
GO:0000725	recombinational repair	9	1	3.02	0.68655
GO:0006383	transcription from RNA polymerase III pr...	11	1	3.69	0.68711
GO:0006974	cellular response to DNA damage stimulus	135	24	45.23	0.68867
GO:0006749	glutathione metabolic process	10	4	3.35	0.68889
GO:0030705	cytoskeleton-dependent intracellular tra...	14	2	4.69	0.69066
GO:2001251	negative regulation of chromosome organi...	8	0	2.68	0.69351
GO:0033617	mitochondrial respiratory chain complex ...	6	2	2.01	0.69422
GO:0051180	vitamin transport	7	2	2.35	0.69898
GO:0043043	peptide biosynthetic process	291	78	97.5	0.69932
GO:0007051	spindle organization	5	0	1.68	0.69973
GO:0006891	intra-Golgi vesicle-mediated transport	5	2	1.68	0.70069
GO:0009435	NAD biosynthetic process	5	1	1.68	0.70278
GO:0098655	cation transmembrane transport	164	64	54.95	0.70302
GO:0071897	DNA biosynthetic process	12	2	4.02	0.70873
GO:0016567	protein ubiquitination	92	22	30.82	0.71191
GO:0009100	glycoprotein metabolic process	80	25	26.8	0.71398
GO:0006412	translation	288	77	96.49	0.71464
GO:0071363	cellular response to growth factor stimu...	8	3	2.68	0.7162
GO:0009117	nucleotide metabolic process	141	41	47.24	0.71794
GO:0007267	cell-cell signaling	64	26	21.44	0.71812
GO:0071426	ribonucleoprotein complex export from nu...	12	2	4.02	0.71838
GO:0046467	membrane lipid biosynthetic process	25	2	8.38	0.7192
GO:0007165	signal transduction	629	221	210.74	0.72098
GO:0006418	tRNA aminoacylation for protein translat...	42	11	14.07	0.72111
GO:0006119	oxidative phosphorylation	19	1	6.37	0.72135
GO:0018193	peptidyl-amino acid modification	135	40	45.23	0.72191
GO:0009063	cellular amino acid catabolic process	25	8	8.38	0.7221
GO:0006298	mismatch repair	6	2	2.01	0.72322
GO:0036065	fucosylation	6	2	2.01	0.72588
GO:0016043	cellular component organization	584	161	195.66	0.72615
GO:0044255	cellular lipid metabolic process	197	60	66	0.72672
GO:0046578	regulation of Ras protein signal transdu...	16	7	5.36	0.72876
GO:0007093	mitotic cell cycle checkpoint	13	0	4.36	0.72973
GO:0051301	cell division	56	9	18.76	0.73054
GO:0006310	DNA recombination	37	5	12.4	0.73073
GO:0002098	tRNA wobble uridine modification	11	4	3.69	0.73093
GO:2000113	negative regulation of cellular macromol...	45	8	15.08	0.73289
GO:0045934	negative regulation of nucleobase-contai...	38	5	12.73	0.73342
GO:0031570	DNA integrity checkpoint	11	0	3.69	0.73354
GO:0006997	nucleus organization	5	1	1.68	0.73493
GO:0016072	rRNA metabolic process	51	11	17.09	0.73551
GO:0046394	carboxylic acid biosynthetic process	77	32	25.8	0.73578
GO:1901566	organonitrogen compound biosynthetic pro...	549	155	183.94	0.73628
GO:0000154	rRNA modification	11	2	3.69	0.73708
GO:0071902	positive regulation of protein serine/th...	6	1	2.01	0.73711
GO:0016570	histone modification	53	7	17.76	0.73731
GO:0006030	chitin metabolic process	45	15	15.08	0.74011
GO:0042273	ribosomal large subunit biogenesis	12	4	4.02	0.74218
GO:0031503	protein complex localization	10	0	3.35	0.74261
GO:0051168	nuclear export	16	3	5.36	0.74592
GO:1901617	organic hydroxy compound biosynthetic pr...	23	11	7.71	0.74816
GO:0030030	cell projection organization	73	28	24.46	0.75077
GO:0006026	aminoglycan catabolic process	7	2	2.35	0.75143
GO:0017004	cytochrome complex assembly	11	4	3.69	0.75205
GO:1901137	carbohydrate derivative biosynthetic pro...	186	49	62.32	0.7567
GO:0080135	regulation of cellular response to stres...	5	1	1.68	0.7591
GO:0071900	regulation of protein serine/threonine k...	24	6	8.04	0.75945
GO:0006482	protein demethylation	5	0	1.68	0.76034
GO:0070988	demethylation	7	1	2.35	0.76099
GO:0009132	nucleoside diphosphate metabolic process	20	8	6.7	0.76248
GO:0048522	positive regulation of cellular process	106	35	35.51	0.76359
GO:1901564	organonitrogen compound metabolic proces...	1988	656	666.06	0.76395
GO:0007265	Ras protein signal transduction	22	10	7.37	0.76449
GO:0006071	glycerol metabolic process	6	2	2.01	0.76467
GO:0009059	macromolecule biosynthetic process	978	244	327.67	0.76716
GO:0034314	Arp2/3 complex-mediated actin nucleation	11	2	3.69	0.76842
GO:0002181	cytoplasmic translation	19	3	6.37	0.77097
GO:0043484	regulation of RNA splicing	8	3	2.68	0.77157
GO:0042255	ribosome assembly	9	4	3.02	0.77163
GO:0015031	protein transport	225	71	75.38	0.77556
GO:0046496	nicotinamide nucleotide metabolic proces...	26	10	8.71	0.77884
GO:0031167	rRNA methylation	7	2	2.35	0.78053
GO:0043436	oxoacid metabolic process	253	96	84.76	0.78171
GO:0044260	cellular macromolecule metabolic process	2096	560	702.24	0.7825
GO:0030203	glycosaminoglycan metabolic process	11	2	3.69	0.78372
GO:0006518	peptide metabolic process	309	85	103.53	0.78376
GO:0022607	cellular component assembly	226	63	75.72	0.78782
GO:0048015	phosphatidylinositol-mediated signaling	5	1	1.68	0.78805
GO:0071310	cellular response to organic substance	29	8	9.72	0.78867
GO:1905515	non-motile cilium assembly	5	1	1.68	0.78869
GO:0019509	L-methionine salvage from methylthioaden...	6	2	2.01	0.78877
GO:0006534	cysteine metabolic process	6	2	2.01	0.78877
GO:0010608	posttranscriptional regulation of gene e...	50	18	16.75	0.78904
GO:0035725	sodium ion transmembrane transport	28	11	9.38	0.78989
GO:0006664	glycolipid metabolic process	25	2	8.38	0.79013
GO:0000470	maturation of LSU-rRNA	5	2	1.68	0.79125
GO:0006606	protein import into nucleus	9	3	3.02	0.79237
GO:0009116	nucleoside metabolic process	35	13	11.73	0.79451
GO:0052547	regulation of peptidase activity	46	20	15.41	0.79512
GO:0046856	phosphatidylinositol dephosphorylation	8	1	2.68	0.79558
GO:0051345	positive regulation of hydrolase activit...	50	15	16.75	0.79578
GO:0015909	long-chain fatty acid transport	9	4	3.02	0.80071
GO:0000278	mitotic cell cycle	46	5	15.41	0.80482
GO:0019637	organophosphate metabolic process	258	74	86.44	0.80556
GO:1901135	carbohydrate derivative metabolic proces...	310	90	103.86	0.80834
GO:0032879	regulation of localization	38	16	12.73	0.80855
GO:0065003	macromolecular complex assembly	160	46	53.61	0.80909
GO:1903508	positive regulation of nucleic acid-temp...	26	7	8.71	0.8096
GO:0018342	protein prenylation	7	1	2.35	0.81151
GO:0006635	fatty acid beta-oxidation	8	3	2.68	0.81244
GO:0045786	negative regulation of cell cycle	27	0	9.05	0.81427
GO:0032367	intracellular cholesterol transport	9	3	3.02	0.81517
GO:0006913	nucleocytoplasmic transport	35	7	11.73	0.81612
GO:0006414	translational elongation	31	12	10.39	0.81676
GO:0042073	intraciliary transport	8	0	2.68	0.81984
GO:0030433	ubiquitin-dependent ERAD pathway	6	2	2.01	0.82077
GO:0048284	organelle fusion	5	0	1.68	0.82115
GO:1901568	fatty acid derivative metabolic process	8	3	2.68	0.82224
GO:0090305	nucleic acid phosphodiester bond hydroly...	73	18	24.46	0.82297
GO:0006081	cellular aldehyde metabolic process	15	6	5.03	0.82305
GO:0019932	second-messenger-mediated signaling	6	2	2.01	0.82337
GO:0072522	purine-containing compound biosynthetic ...	62	17	20.77	0.82449
GO:0071985	multivesicular body sorting pathway	6	1	2.01	0.82472
GO:0046474	glycerophospholipid biosynthetic process	32	3	10.72	0.82564
GO:0033044	regulation of chromosome organization	12	0	4.02	0.82571
GO:0051298	centrosome duplication	8	2	2.68	0.82597
GO:0000956	nuclear-transcribed mRNA catabolic proce...	26	6	8.71	0.82747
GO:0044782	cilium organization	42	16	14.07	0.83027
GO:0006511	ubiquitin-dependent protein catabolic pr...	75	12	25.13	0.83044
GO:0006744	ubiquinone biosynthetic process	8	2	2.68	0.83106
GO:0006367	transcription initiation from RNA polyme...	13	2	4.36	0.83219
GO:0045892	negative regulation of transcription, DN...	30	4	10.05	0.83255
GO:0006812	cation transport	208	82	69.69	0.83261
GO:0051169	nuclear transport	36	7	12.06	0.83276
GO:0006413	translational initiation	48	10	16.08	0.83423
GO:0008643	carbohydrate transport	12	2	4.02	0.83668
GO:0009150	purine ribonucleotide metabolic process	96	25	32.16	0.83759
GO:0006388	tRNA splicing, via endonucleolytic cleav...	5	0	1.68	0.83931
GO:0031400	negative regulation of protein modificat...	8	1	2.68	0.84295
GO:0045936	negative regulation of phosphate metabol...	8	1	2.68	0.84295
GO:0016071	mRNA metabolic process	156	35	52.27	0.84361
GO:0006302	double-strand break repair	16	2	5.36	0.84658
GO:0006399	tRNA metabolic process	110	25	36.85	0.84883
GO:0007062	sister chromatid cohesion	11	2	3.69	0.84962
GO:0140013	meiotic nuclear division	7	1	2.35	0.85032
GO:0006725	cellular aromatic compound metabolic pro...	1323	328	443.26	0.85062
GO:0009452	7-methylguanosine RNA capping	8	1	2.68	0.85079
GO:0072350	tricarboxylic acid metabolic process	25	7	8.38	0.85081
GO:1901360	organic cyclic compound metabolic proces...	1341	332	449.29	0.85142
GO:0048523	negative regulation of cellular process	167	41	55.95	0.85177
GO:0010970	transport along microtubule	12	1	4.02	0.85227
GO:0055070	copper ion homeostasis	5	1	1.68	0.85231
GO:0006732	coenzyme metabolic process	76	32	25.46	0.85273
GO:0009141	nucleoside triphosphate metabolic proces...	62	13	20.77	0.85378
GO:1901292	nucleoside phosphate catabolic process	12	5	4.02	0.85379
GO:0032446	protein modification by small protein co...	102	25	34.17	0.85496
GO:0006265	DNA topological change	5	1	1.68	0.85796
GO:0018212	peptidyl-tyrosine modification	32	12	10.72	0.85891
GO:0009130	pyrimidine nucleoside monophosphate bios...	7	1	2.35	0.86021
GO:0006357	regulation of transcription from RNA pol...	148	35	49.59	0.86053
GO:0000226	microtubule cytoskeleton organization	48	16	16.08	0.86103
GO:0071705	nitrogen compound transport	269	84	90.13	0.8642
GO:0007064	mitotic sister chromatid cohesion	5	0	1.68	0.8647
GO:0098732	macromolecule deacylation	7	2	2.35	0.86494
GO:0043039	tRNA aminoacylation	44	12	14.74	0.86502
GO:0006807	nitrogen compound metabolic process	2997	903	1004.11	0.86516
GO:0071495	cellular response to endogenous stimulus	19	6	6.37	0.86779
GO:0016180	snRNA processing	8	2	2.68	0.8689
GO:0046916	cellular transition metal ion homeostasi...	13	3	4.36	0.86943
GO:0050790	regulation of catalytic activity	163	57	54.61	0.86955
GO:0051235	maintenance of location	8	4	2.68	0.87432
GO:0043161	proteasome-mediated ubiquitin-dependent ...	20	4	6.7	0.87485
GO:0006476	protein deacetylation	5	1	1.68	0.87534
GO:0051170	nuclear import	10	3	3.35	0.87543
GO:0050658	RNA transport	27	6	9.05	0.87553
GO:0006167	AMP biosynthetic process	5	1	1.68	0.8764
GO:0035335	peptidyl-tyrosine dephosphorylation	36	10	12.06	0.87759
GO:0042176	regulation of protein catabolic process	7	1	2.35	0.87958
GO:0007094	mitotic spindle assembly checkpoint	7	0	2.35	0.88306
GO:0022904	respiratory electron transport chain	16	0	5.36	0.88537
GO:0006405	RNA export from nucleus	13	2	4.36	0.88618
GO:0030182	neuron differentiation	25	10	8.38	0.88708
GO:0006082	organic acid metabolic process	256	96	85.77	0.88855
GO:0048193	Golgi vesicle transport	37	12	12.4	0.88896
GO:0034599	cellular response to oxidative stress	8	4	2.68	0.88992
GO:0019941	modification-dependent protein catabolic...	76	12	25.46	0.89029
GO:0007049	cell cycle	148	23	49.59	0.89124
GO:0015914	phospholipid transport	11	1	3.69	0.89461
GO:0006333	chromatin assembly or disassembly	15	4	5.03	0.89504
GO:0072523	purine-containing compound catabolic pro...	9	3	3.02	0.89522
GO:0006144	purine nucleobase metabolic process	9	2	3.02	0.89522
GO:0006506	GPI anchor biosynthetic process	24	2	8.04	0.89545
GO:0051603	proteolysis involved in cellular protein...	84	13	28.14	0.89779
GO:0051494	negative regulation of cytoskeleton orga...	14	4	4.69	0.89844
GO:0006879	cellular iron ion homeostasis	9	2	3.02	0.89877
GO:0043410	positive regulation of MAPK cascade	6	1	2.01	0.90069
GO:0090502	RNA phosphodiester bond hydrolysis, endo...	19	6	6.37	0.90092
GO:0006006	glucose metabolic process	14	8	4.69	0.90117
GO:1901701	cellular response to oxygen-containing c...	15	6	5.03	0.90318
GO:0035966	response to topologically incorrect prot...	5	1	1.68	0.90422
GO:0000070	mitotic sister chromatid segregation	23	2	7.71	0.90502
GO:0006432	phenylalanyl-tRNA aminoacylation	6	1	2.01	0.9052
GO:0009101	glycoprotein biosynthetic process	76	24	25.46	0.90648
GO:0031399	regulation of protein modification proce...	50	15	16.75	0.90797
GO:0061640	cytoskeleton-dependent cytokinesis	6	1	2.01	0.91332
GO:0010876	lipid localization	57	17	19.1	0.91391
GO:0006783	heme biosynthetic process	13	2	4.36	0.91397
GO:0009179	purine ribonucleoside diphosphate metabo...	15	5	5.03	0.91404
GO:1901068	guanosine-containing compound metabolic ...	8	4	2.68	0.91436
GO:0009167	purine ribonucleoside monophosphate meta...	67	15	22.45	0.91468
GO:1901700	response to oxygen-containing compound	17	7	5.7	0.91918
GO:0030150	protein import into mitochondrial matrix	8	1	2.68	0.92229
GO:0006120	mitochondrial electron transport, NADH t...	7	0	2.35	0.92311
GO:1902532	negative regulation of intracellular sig...	5	0	1.68	0.92365
GO:0051253	negative regulation of RNA metabolic pro...	37	5	12.4	0.92471
GO:0007623	circadian rhythm	6	1	2.01	0.92629
GO:0030071	regulation of mitotic metaphase/anaphase...	9	0	3.02	0.92673
GO:0090503	RNA phosphodiester bond hydrolysis, exon...	10	0	3.35	0.92771
GO:0015931	nucleobase-containing compound transport	54	15	18.09	0.92772
GO:0000184	nuclear-transcribed mRNA catabolic proce...	11	1	3.69	0.92799
GO:1901264	carbohydrate derivative transport	27	9	9.05	0.92811
GO:0015780	nucleotide-sugar transport	5	0	1.68	0.92848
GO:0006401	RNA catabolic process	40	8	13.4	0.92932
GO:0018205	peptidyl-lysine modification	43	10	14.41	0.93052
GO:0006661	phosphatidylinositol biosynthetic proces...	27	2	9.05	0.93058
GO:0032501	multicellular organismal process	254	88	85.1	0.93075
GO:0006370	7-methylguanosine mRNA capping	6	1	2.01	0.931
GO:0032259	methylation	108	27	36.18	0.93103
GO:0009064	glutamine family amino acid metabolic pr...	21	6	7.04	0.93309
GO:0048017	inositol lipid-mediated signaling	6	1	2.01	0.93469
GO:0032006	regulation of TOR signaling	12	2	4.02	0.93874
GO:0035303	regulation of dephosphorylation	14	4	4.69	0.93966
GO:0033365	protein localization to organelle	53	20	17.76	0.94047
GO:0006364	rRNA processing	50	11	16.75	0.94055
GO:0015074	DNA integration	5	0	1.68	0.94074
GO:0006284	base-excision repair	5	0	1.68	0.94113
GO:0034660	ncRNA metabolic process	171	38	57.29	0.94214
GO:0009165	nucleotide biosynthetic process	84	24	28.14	0.94349
GO:0032509	endosome transport via multivesicular bo...	5	1	1.68	0.94376
GO:0006826	iron ion transport	7	1	2.35	0.94448
GO:0034968	histone lysine methylation	14	1	4.69	0.94467
GO:0006886	intracellular protein transport	141	42	47.24	0.94726
GO:0006220	pyrimidine nucleotide metabolic process	15	4	5.03	0.94883
GO:0003008	system process	62	22	20.77	0.94945
GO:0006914	autophagy	24	5	8.04	0.94964
GO:0006189	de novo' IMP biosynthetic process	6	2	2.01	0.95085
GO:0019953	sexual reproduction	20	8	6.7	0.95114
GO:1902531	regulation of intracellular signal trans...	46	13	15.41	0.95189
GO:0007020	microtubule nucleation	6	0	2.01	0.95198
GO:0042752	regulation of circadian rhythm	5	1	1.68	0.95222
GO:0043094	cellular metabolic compound salvage	13	5	4.36	0.95266
GO:0051604	protein maturation	33	6	11.06	0.95277
GO:0098662	inorganic cation transmembrane transport	150	61	50.26	0.95353
GO:0003006	developmental process involved in reprod...	12	4	4.02	0.95435
GO:0016050	vesicle organization	6	2	2.01	0.95539
GO:0019318	hexose metabolic process	33	14	11.06	0.95544
GO:0009314	response to radiation	15	11	5.03	0.95667
GO:0034976	response to endoplasmic reticulum stress	7	2	2.35	0.95818
GO:0034204	lipid translocation	5	0	1.68	0.9586
GO:0008152	metabolic process	4074	1295	1364.94	0.96063
GO:0030488	tRNA methylation	11	1	3.69	0.96092
GO:0031123	RNA 3'-end processing	11	1	3.69	0.96096
GO:0016573	histone acetylation	15	3	5.03	0.96254
GO:0051252	regulation of RNA metabolic process	461	119	154.45	0.96263
GO:0016192	vesicle-mediated transport	161	47	53.94	0.96284
GO:0006665	sphingolipid metabolic process	19	3	6.37	0.96305
GO:0006397	mRNA processing	128	29	42.88	0.96383
GO:0016226	iron-sulfur cluster assembly	10	1	3.35	0.96463
GO:1901605	alpha-amino acid metabolic process	64	23	21.44	0.96549
GO:0006338	chromatin remodeling	21	4	7.04	0.96557
GO:0042773	ATP synthesis coupled electron transport	14	0	4.69	0.96618
GO:0006892	post-Golgi vesicle-mediated transport	5	1	1.68	0.96682
GO:0043241	protein complex disassembly	19	7	6.37	0.96683
GO:0006560	proline metabolic process	7	0	2.35	0.96972
GO:0006473	protein acetylation	17	4	5.7	0.97095
GO:0044283	small molecule biosynthetic process	111	48	37.19	0.97128
GO:0009156	ribonucleoside monophosphate biosyntheti...	39	9	13.07	0.97129
GO:0046390	ribose phosphate biosynthetic process	66	18	22.11	0.97134
GO:0072525	pyridine-containing compound biosyntheti...	9	3	3.02	0.97147
GO:0140053	mitochondrial gene expression	13	4	4.36	0.97348
GO:0035246	peptidyl-arginine N-methylation	10	3	3.35	0.97349
GO:0032774	RNA biosynthetic process	519	127	173.88	0.97349
GO:1902904	negative regulation of supramolecular fi...	11	4	3.69	0.97359
GO:0110053	regulation of actin filament organizatio...	27	7	9.05	0.97375
GO:0008380	RNA splicing	87	21	29.15	0.97379
GO:0009124	nucleoside monophosphate biosynthetic pr...	42	9	14.07	0.97392
GO:0050911	detection of chemical stimulus involved ...	14	2	4.69	0.97392
GO:0000723	telomere maintenance	9	1	3.02	0.97472
GO:0030111	regulation of Wnt signaling pathway	10	3	3.35	0.97475
GO:0016458	gene silencing	39	11	13.07	0.97517
GO:0040029	regulation of gene expression, epigeneti...	20	6	6.7	0.97532
GO:1901699	cellular response to nitrogen compound	11	1	3.69	0.97598
GO:0002218	activation of innate immune response	10	4	3.35	0.97664
GO:0016485	protein processing	20	4	6.7	0.97751
GO:0006996	organelle organization	416	112	139.38	0.97804
GO:0097428	protein maturation by iron-sulfur cluste...	7	1	2.35	0.97951
GO:0006782	protoporphyrinogen IX biosynthetic proce...	7	2	2.35	0.97985
GO:0001732	formation of cytoplasmic translation ini...	13	0	4.36	0.98019
GO:0051726	regulation of cell cycle	63	9	21.11	0.98056
GO:0032366	intracellular sterol transport	10	3	3.35	0.9806
GO:0006352	DNA-templated transcription, initiation	31	4	10.39	0.98084
GO:0010256	endomembrane system organization	15	4	5.03	0.98085
GO:0070838	divalent metal ion transport	45	21	15.08	0.98134
GO:0006182	cGMP biosynthetic process	14	4	4.69	0.98135
GO:0070925	organelle assembly	64	23	21.44	0.98286
GO:0043623	cellular protein complex assembly	81	25	27.14	0.98327
GO:0090501	RNA phosphodiester bond hydrolysis	38	6	12.73	0.98408
GO:0015711	organic anion transport	46	16	15.41	0.98417
GO:0016070	RNA metabolic process	906	214	303.54	0.98433
GO:0042127	regulation of cell proliferation	6	2	2.01	0.98487
GO:0046942	carboxylic acid transport	15	6	5.03	0.98533
GO:0032008	positive regulation of TOR signaling	8	2	2.68	0.98711
GO:0018216	peptidyl-arginine methylation	12	3	4.02	0.98817
GO:0048518	positive regulation of biological proces...	118	39	39.53	0.98824
GO:0016197	endosomal transport	19	2	6.37	0.98868
GO:0007033	vacuole organization	9	0	3.02	0.98888
GO:0000724	double-strand break repair via homologou...	8	1	2.68	0.9889
GO:0006694	steroid biosynthetic process	6	2	2.01	0.98936
GO:0016236	macroautophagy	5	0	1.68	0.99032
GO:0044267	cellular protein metabolic process	1121	329	375.58	0.99036
GO:0000077	DNA damage checkpoint	10	0	3.35	0.99069
GO:0070646	protein modification by small protein re...	39	10	13.07	0.99091
GO:0006354	DNA-templated transcription, elongation	14	3	4.69	0.99099
GO:0006261	DNA-dependent DNA replication	25	3	8.38	0.99142
GO:0007275	multicellular organism development	161	58	53.94	0.99212
GO:0042775	mitochondrial ATP synthesis coupled elec...	12	0	4.02	0.99223
GO:0016482	cytosolic transport	12	1	4.02	0.9932
GO:0043631	RNA polyadenylation	5	0	1.68	0.99364
GO:0061025	membrane fusion	12	0	4.02	0.99386
GO:0009263	deoxyribonucleotide biosynthetic process	5	0	1.68	0.99389
GO:0016571	histone methylation	16	1	5.36	0.99462
GO:0046839	phospholipid dephosphorylation	9	1	3.02	0.995
GO:0009966	regulation of signal transduction	81	23	27.14	0.99536
GO:1903507	negative regulation of nucleic acid-temp...	36	5	12.06	0.99557
GO:0016255	attachment of GPI anchor to protein	5	0	1.68	0.99562
GO:0065004	protein-DNA complex assembly	18	4	6.03	0.99572
GO:0006355	regulation of transcription, DNA-templat...	437	113	146.41	0.99708
GO:0006690	icosanoid metabolic process	7	3	2.35	0.99722
GO:0060429	epithelium development	11	3	3.69	0.99728
GO:0006351	transcription, DNA-templated	506	125	169.53	0.99736
GO:0043549	regulation of kinase activity	30	10	10.05	0.99769
GO:0035195	gene silencing by miRNA	9	1	3.02	0.99787
GO:0050909	sensory perception of taste	20	1	6.7	0.99803
GO:1901991	negative regulation of mitotic cell cycl...	9	0	3.02	0.99813
GO:0032989	cellular component morphogenesis	27	10	9.05	0.99817
GO:0007043	cell-cell junction assembly	6	2	2.01	0.99818
GO:0042147	retrograde transport, endosome to Golgi	9	1	3.02	0.99846
GO:0007088	regulation of mitotic nuclear division	10	0	3.35	0.99867
GO:0050912	detection of chemical stimulus involved ...	5	0	1.68	0.9987
GO:0033043	regulation of organelle organization	55	12	18.43	0.99875
GO:0043254	regulation of protein complex assembly	27	7	9.05	0.99877
GO:0070918	production of small RNA involved in gene...	5	0	1.68	0.99881
GO:0048477	oogenesis	8	2	2.68	0.99923
GO:0000245	spliceosomal complex assembly	6	0	2.01	0.99931
GO:0034470	ncRNA processing	123	25	41.21	0.99933
GO:0010243	response to organonitrogen compound	10	2	3.35	0.99939
GO:0006289	nucleotide-excision repair	18	3	6.03	0.99943
GO:0032870	cellular response to hormone stimulus	10	3	3.35	0.99969
GO:0006400	tRNA modification	38	6	12.73	0.9997
GO:0006281	DNA repair	122	23	40.87	0.99984
GO:0055129	L-proline biosynthetic process	5	0	1.68	0.99993
GO:0009060	aerobic respiration	24	6	8.04	0.99993
GO:0008154	actin polymerization or depolymerization	28	8	9.38	0.99997
GO:0042168	heme metabolic process	14	2	4.69	0.99999
GO:0006497	protein lipidation	25	2	8.38	1
GO:0043543	protein acylation	18	4	6.03	1
GO:0009069	serine family amino acid metabolic proce...	15	7	5.03	1
GO:0051493	regulation of cytoskeleton organization	37	11	12.4	1
GO:0009199	ribonucleoside triphosphate metabolic pr...	60	13	20.1	1
GO:0072655	establishment of protein localization to...	15	3	5.03	1
GO:0030041	actin filament polymerization	26	7	8.71	1
GO:0043102	amino acid salvage	6	2	2.01	1
GO:0030031	cell projection assembly	38	16	12.73	1
GO:0009161	ribonucleoside monophosphate metabolic p...	73	16	24.46	1
GO:0009163	nucleoside biosynthetic process	16	5	5.36	1
GO:0009164	nucleoside catabolic process	6	4	2.01	1
GO:0022412	cellular process involved in reproductio...	10	4	3.35	1
GO:0022414	reproductive process	35	10	11.73	1
GO:0070085	glycosylation	80	26	26.8	1
GO:0000819	sister chromatid segregation	27	4	9.05	1
GO:0016053	organic acid biosynthetic process	77	32	25.8	1
GO:0016054	organic acid catabolic process	34	12	11.39	1
GO:2001141	regulation of RNA biosynthetic process	448	115	150.1	1
GO:0009185	ribonucleoside diphosphate metabolic pro...	15	5	5.03	1
GO:0009187	cyclic nucleotide metabolic process	23	9	7.71	1
GO:0000303	response to superoxide	7	4	2.35	1
GO:0030003	cellular cation homeostasis	20	6	6.7	1
GO:0033559	unsaturated fatty acid metabolic process	6	3	2.01	1
GO:0046068	cGMP metabolic process	14	4	4.69	1
GO:0000305	response to oxygen radical	7	4	2.35	1
GO:0042391	regulation of membrane potential	10	6	3.35	1
GO:0032269	negative regulation of cellular protein ...	67	25	22.45	1
GO:0007091	metaphase/anaphase transition of mitotic...	9	0	3.02	1
GO:0009173	pyrimidine ribonucleoside monophosphate ...	5	1	1.68	1
GO:0009174	pyrimidine ribonucleoside monophosphate ...	5	1	1.68	1
GO:0090662	ATP hydrolysis coupled transmembrane tra...	17	14	5.7	1
GO:0071715	icosanoid transport	8	4	2.68	1
GO:0046501	protoporphyrinogen IX metabolic process	7	2	2.35	1
GO:0016073	snRNA metabolic process	8	2	2.68	1
GO:0006213	pyrimidine nucleoside metabolic process	11	5	3.69	1
GO:0009123	nucleoside monophosphate metabolic proce...	79	17	26.47	1
GO:0007409	axonogenesis	19	7	6.37	1
GO:0009126	purine nucleoside monophosphate metaboli...	67	15	22.45	1
GO:0009127	purine nucleoside monophosphate biosynth...	33	8	11.06	1
GO:1901381	positive regulation of potassium ion tra...	11	4	3.69	1
GO:0009129	pyrimidine nucleoside monophosphate meta...	7	1	2.35	1
GO:0000910	cytokinesis	11	3	3.69	1
GO:0043266	regulation of potassium ion transport	11	4	3.69	1
GO:0043268	positive regulation of potassium ion tra...	11	4	3.69	1
GO:0009112	nucleobase metabolic process	14	4	4.69	1
GO:0043269	regulation of ion transport	31	13	10.39	1
GO:1902221	erythrose 4-phosphate/phosphoenolpyruvat...	5	2	1.68	1
GO:1902222	erythrose 4-phosphate/phosphoenolpyruvat...	5	2	1.68	1
GO:0032271	regulation of protein polymerization	26	7	8.71	1
GO:0032272	negative regulation of protein polymeriz...	10	4	3.35	1
GO:0032273	positive regulation of protein polymeriz...	15	3	5.03	1
GO:0009119	ribonucleoside metabolic process	28	11	9.38	1
GO:0022406	membrane docking	11	2	3.69	1
GO:0098542	defense response to other organism	6	3	2.01	1
GO:1901379	regulation of potassium ion transmembran...	11	4	3.69	1
GO:0009142	nucleoside triphosphate biosynthetic pro...	24	5	8.04	1
GO:0009144	purine nucleoside triphosphate metabolic...	57	12	19.1	1
GO:0009145	purine nucleoside triphosphate biosynthe...	21	4	7.04	1
GO:0009148	pyrimidine nucleoside triphosphate biosy...	6	3	2.01	1
GO:0048232	male gamete generation	7	3	2.35	1
GO:0098534	centriole assembly	7	2	2.35	1
GO:0009135	purine nucleoside diphosphate metabolic ...	15	5	5.03	1
GO:0043270	positive regulation of ion transport	11	4	3.69	1
GO:0031323	regulation of cellular metabolic process	603	170	202.03	1
GO:1905114	cell surface receptor signaling pathway ...	40	17	13.4	1
GO:0031324	negative regulation of cellular metaboli...	106	32	35.51	1
GO:0120031	plasma membrane bounded cell projection ...	38	16	12.73	1
GO:0031325	positive regulation of cellular metaboli...	54	17	18.09	1
GO:0031326	regulation of cellular biosynthetic proc...	492	131	164.84	1
GO:1901880	negative regulation of protein depolymer...	8	2	2.68	1
GO:0046040	IMP metabolic process	7	3	2.35	1
GO:0071704	organic substance metabolic process	3452	1084	1156.55	1
GO:0097237	cellular response to toxic substance	32	13	10.72	1
GO:0002097	tRNA wobble base modification	11	4	3.69	1
GO:0120039	plasma membrane bounded cell projection ...	19	7	6.37	1
GO:0046049	UMP metabolic process	5	1	1.68	1
GO:0009617	response to bacterium	6	3	2.01	1
GO:0046036	CTP metabolic process	6	3	2.01	1
GO:2000816	negative regulation of mitotic sister ch...	7	0	2.35	1
GO:0000904	cell morphogenesis involved in different...	19	7	6.37	1
GO:0031347	regulation of defense response	10	4	3.35	1
GO:0031349	positive regulation of defense response	10	4	3.35	1
GO:0007167	enzyme linked receptor protein signaling...	26	11	8.71	1
GO:0042327	positive regulation of phosphorylation	12	4	4.02	1
GO:1903509	liposaccharide metabolic process	25	2	8.38	1
GO:0005976	polysaccharide metabolic process	7	4	2.35	1
GO:0043242	negative regulation of protein complex d...	8	2	2.68	1
GO:0031333	negative regulation of protein complex a...	10	4	3.35	1
GO:0031334	positive regulation of protein complex a...	15	3	5.03	1
GO:0009636	response to toxic substance	32	13	10.72	1
GO:0050776	regulation of immune response	10	4	3.35	1
GO:0050778	positive regulation of immune response	10	4	3.35	1
GO:0042886	amide transport	227	72	76.05	1
GO:0071359	cellular response to dsRNA	5	0	1.68	1

## Sheet: GO Enrichment MF
GO.ID	Term	Annotated	Significant	Expected	weight01KS
GO:0009881	photoreceptor activity	12	10	3.97	5.6e-07
GO:0005509	calcium ion binding	176	77	58.15	4.1e-05
GO:0022857	transmembrane transporter activity	557	235	184.04	0.00043
GO:0005328	neurotransmitter:sodium symporter activi...	19	13	6.28	0.00077
GO:0046961	proton-transporting ATPase activity, rot...	8	7	2.64	0.00131
GO:0008569	ATP-dependent microtubule motor activity...	12	10	3.97	0.00157
GO:0015293	symporter activity	30	22	9.91	0.00206
GO:0016788	hydrolase activity, acting on ester bond...	347	134	114.66	0.00271
GO:0004806	triglyceride lipase activity	28	13	9.25	0.00364
GO:0051015	actin filament binding	22	13	7.27	0.00416
GO:0004888	transmembrane signaling receptor activit...	215	90	71.04	0.00421
GO:0005230	extracellular ligand-gated ion channel a...	44	26	14.54	0.00614
GO:0004890	GABA-A receptor activity	5	5	1.65	0.0069
GO:0016840	carbon-nitrogen lyase activity	9	7	2.97	0.01
GO:0004198	calcium-dependent cysteine-type endopept...	9	6	2.97	0.01091
GO:0050660	flavin adenine dinucleotide binding	80	29	26.43	0.01232
GO:0005347	ATP transmembrane transporter activity	19	9	6.28	0.013
GO:0004930	G-protein coupled receptor activity	119	45	39.32	0.01485
GO:0003774	motor activity	66	34	21.81	0.01553
GO:0017137	Rab GTPase binding	9	6	2.97	0.01613
GO:0030215	semaphorin receptor binding	5	4	1.65	0.0162
GO:0008289	lipid binding	70	22	23.13	0.0171
GO:0004181	metallocarboxypeptidase activity	26	15	8.59	0.01818
GO:0015267	channel activity	164	70	54.19	0.01836
GO:0019205	nucleobase-containing compound kinase ac...	18	9	5.95	0.01904
GO:0008242	omega peptidase activity	9	5	2.97	0.0206
GO:0016755	transferase activity, transferring amino...	10	7	3.3	0.02066
GO:0019239	deaminase activity	11	7	3.63	0.02312
GO:0004553	hydrolase activity, hydrolyzing O-glycos...	82	33	27.09	0.02476
GO:0016758	transferase activity, transferring hexos...	93	27	30.73	0.02642
GO:0005549	odorant binding	71	33	23.46	0.02718
GO:0102756	very-long-chain 3-ketoacyl-CoA synthase ...	20	9	6.61	0.02956
GO:0102336	3-oxo-arachidoyl-CoA synthase activity	20	9	6.61	0.02956
GO:0102337	3-oxo-cerotoyl-CoA synthase activity	20	9	6.61	0.02956
GO:0102338	3-oxo-lignoceronyl-CoA synthase activity	20	9	6.61	0.02956
GO:0000977	RNA polymerase II regulatory region sequ...	6	5	1.98	0.03079
GO:0016491	oxidoreductase activity	631	220	208.49	0.03101
GO:0004497	monooxygenase activity	161	58	53.2	0.03231
GO:0099516	ion antiporter activity	8	7	2.64	0.03346
GO:0016614	oxidoreductase activity, acting on CH-OH...	70	26	23.13	0.03351
GO:0004114	3',5'-cyclic-nucleotide phosphodiesteras...	11	7	3.63	0.0346
GO:0016620	oxidoreductase activity, acting on the a...	40	16	13.22	0.04046
GO:0015081	sodium ion transmembrane transporter act...	52	25	17.18	0.04209
GO:0015491	cation:cation antiporter activity	6	5	1.98	0.04236
GO:0005525	GTP binding	175	67	57.82	0.04375
GO:0003779	actin binding	97	46	32.05	0.04421
GO:0005200	structural constituent of cytoskeleton	16	9	5.29	0.04508
GO:0046933	proton-transporting ATP synthase activit...	11	4	3.63	0.04523
GO:0004867	serine-type endopeptidase inhibitor acti...	29	13	9.58	0.04546
GO:0004500	dopamine beta-monooxygenase activity	5	2	1.65	0.0459
GO:0004364	glutathione transferase activity	5	4	1.65	0.0507
GO:0019829	cation-transporting ATPase activity	19	10	6.28	0.05376
GO:0015662	ATPase activity, coupled to transmembran...	5	3	1.65	0.05394
GO:1901681	sulfur compound binding	16	8	5.29	0.05431
GO:0008236	serine-type peptidase activity	310	116	102.43	0.05668
GO:0042302	structural constituent of cuticle	182	65	60.14	0.05852
GO:0016798	hydrolase activity, acting on glycosyl b...	109	45	36.02	0.05858
GO:0005319	lipid transporter activity	25	6	8.26	0.05861
GO:0005216	ion channel activity	156	65	51.55	0.05876
GO:0016860	intramolecular oxidoreductase activity	14	8	4.63	0.05901
GO:0003924	GTPase activity	126	47	41.63	0.05935
GO:0016209	antioxidant activity	31	12	10.24	0.06015
GO:0004177	aminopeptidase activity	40	21	13.22	0.06039
GO:0004623	phospholipase A2 activity	8	4	2.64	0.06053
GO:0005088	Ras guanyl-nucleotide exchange factor ac...	12	4	3.97	0.06572
GO:0022853	active ion transmembrane transporter act...	23	13	7.6	0.06698
GO:0015294	solute:cation symporter activity	23	16	7.6	0.06705
GO:0015108	chloride transmembrane transporter activ...	11	5	3.63	0.06743
GO:0098772	molecular function regulator	245	85	80.95	0.06777
GO:0016409	palmitoyltransferase activity	12	4	3.97	0.06858
GO:0004144	diacylglycerol O-acyltransferase activit...	6	4	1.98	0.06886
GO:0030145	manganese ion binding	12	7	3.97	0.07046
GO:0004089	carbonate dehydratase activity	15	8	4.96	0.07138
GO:0005507	copper ion binding	20	8	6.61	0.07384
GO:0016298	lipase activity	55	27	18.17	0.08197
GO:0005506	iron ion binding	183	64	60.47	0.08495
GO:0070006	metalloaminopeptidase activity	14	8	4.63	0.08686
GO:0019842	vitamin binding	59	27	19.49	0.08757
GO:0016702	oxidoreductase activity, acting on singl...	9	4	2.97	0.08805
GO:0016776	phosphotransferase activity, phosphate g...	12	6	3.97	0.0891
GO:0005086	ARF guanyl-nucleotide exchange factor ac...	6	2	1.98	0.09436
GO:0016705	oxidoreductase activity, acting on paire...	178	61	58.81	0.09531
GO:0060590	ATPase regulator activity	9	4	2.97	0.0985
GO:0032574	5'-3' RNA helicase activity	7	5	2.31	0.09872
GO:0005515	protein binding	1956	645	646.3	0.09994
GO:0015299	solute:proton antiporter activity	5	4	1.65	0.09995
GO:0005267	potassium channel activity	31	12	10.24	0.10063
GO:0099094	ligand-gated cation channel activity	16	9	5.29	0.10373
GO:0003995	acyl-CoA dehydrogenase activity	10	4	3.3	0.10574
GO:0004252	serine-type endopeptidase activity	289	106	95.49	0.10786
GO:0004784	superoxide dismutase activity	7	4	2.31	0.11602
GO:0016279	protein-lysine N-methyltransferase activ...	16	4	5.29	0.11679
GO:0004970	ionotropic glutamate receptor activity	18	9	5.95	0.11996
GO:0102567	phospholipase A2 activity (consuming 1,2...	6	3	1.98	0.1221
GO:0102568	phospholipase A2 activity consuming 1,2-...	6	3	1.98	0.1221
GO:0030414	peptidase inhibitor activity	48	21	15.86	0.12219
GO:0003707	steroid hormone receptor activity	16	7	5.29	0.12398
GO:0008233	peptidase activity	589	227	194.62	0.12668
GO:0016881	acid-amino acid ligase activity	6	4	1.98	0.12982
GO:0017048	Rho GTPase binding	20	8	6.61	0.13105
GO:0003824	catalytic activity	3608	1276	1192.15	0.13222
GO:0035591	signaling adaptor activity	6	3	1.98	0.13853
GO:0030246	carbohydrate binding	71	31	23.46	0.1414
GO:0015085	calcium ion transmembrane transporter ac...	26	14	8.59	0.14252
GO:0004620	phospholipase activity	28	13	9.25	0.14406
GO:0016701	oxidoreductase activity, acting on singl...	10	5	3.3	0.14579
GO:0016811	hydrolase activity, acting on carbon-nit...	30	12	9.91	0.14747
GO:0008235	metalloexopeptidase activity	49	27	16.19	0.14924
GO:0016818	hydrolase activity, acting on acid anhyd...	462	167	152.65	0.14926
GO:0015035	protein disulfide oxidoreductase activit...	10	6	3.3	0.15023
GO:0020037	heme binding	174	62	57.49	0.15438
GO:0045296	cadherin binding	6	3	1.98	0.15553
GO:0052745	inositol phosphate phosphatase activity	6	3	1.98	0.15586
GO:0016814	hydrolase activity, acting on carbon-nit...	12	6	3.97	0.15781
GO:0031177	phosphopantetheine binding	6	4	1.98	0.16073
GO:0004698	calcium-dependent protein kinase C activ...	5	2	1.65	0.16151
GO:0001882	nucleoside binding	179	69	59.14	0.1622
GO:0005102	receptor binding	67	24	22.14	0.16321
GO:0008237	metallopeptidase activity	156	71	51.55	0.16326
GO:0070573	metallodipeptidase activity	8	3	2.64	0.16502
GO:0004714	transmembrane receptor protein tyrosine ...	8	5	2.64	0.16582
GO:0042578	phosphoric ester hydrolase activity	139	47	45.93	0.16887
GO:0005262	calcium channel activity	20	10	6.61	0.16925
GO:0015405	P-P-bond-hydrolysis-driven transmembrane...	69	25	22.8	0.17041
GO:0016746	transferase activity, transferring acyl ...	168	61	55.51	0.17324
GO:0008234	cysteine-type peptidase activity	80	28	26.43	0.17817
GO:0015078	hydrogen ion transmembrane transporter a...	49	20	16.19	0.18208
GO:0033218	amide binding	16	8	5.29	0.18571
GO:0004659	prenyltransferase activity	10	3	3.3	0.18628
GO:0000976	transcription regulatory region sequence...	10	8	3.3	0.18763
GO:0050839	cell adhesion molecule binding	7	4	2.31	0.19027
GO:0043168	anion binding	1150	406	379.98	0.19136
GO:0019899	enzyme binding	108	38	35.69	0.19355
GO:0005249	voltage-gated potassium channel activity	18	7	5.95	0.19453
GO:0004222	metalloendopeptidase activity	62	25	20.49	0.19597
GO:0015036	disulfide oxidoreductase activity	11	7	3.63	0.19635
GO:0022848	acetylcholine-gated cation-selective cha...	10	6	3.3	0.19897
GO:0030545	receptor regulator activity	45	13	14.87	0.20094
GO:0016791	phosphatase activity	110	34	36.35	0.20735
GO:0004879	nuclear receptor activity	7	3	2.31	0.20822
GO:0008138	protein tyrosine/serine/threonine phosph...	13	4	4.3	0.21184
GO:0008483	transaminase activity	14	7	4.63	0.21307
GO:0005245	voltage-gated calcium channel activity	6	3	1.98	0.21309
GO:0016887	ATPase activity	177	67	58.48	0.21508
GO:0016888	endodeoxyribonuclease activity, producin...	8	3	2.64	0.22258
GO:0035091	phosphatidylinositol binding	27	7	8.92	0.22651
GO:0016805	dipeptidase activity	9	4	2.97	0.22652
GO:0036374	glutathione hydrolase activity	5	1	1.65	0.22755
GO:0004180	carboxypeptidase activity	40	22	13.22	0.22885
GO:0005516	calmodulin binding	12	5	3.97	0.23079
GO:0008271	secondary active sulfate transmembrane t...	10	5	3.3	0.23193
GO:0004035	alkaline phosphatase activity	7	3	2.31	0.23201
GO:0051087	chaperone binding	8	4	2.64	0.23459
GO:0016857	racemase and epimerase activity, acting ...	6	1	1.98	0.23491
GO:0061733	peptide-lysine-N-acetyltransferase activ...	11	3	3.63	0.23498
GO:0019208	phosphatase regulator activity	11	1	3.63	0.23668
GO:0004843	thiol-dependent ubiquitin-specific prote...	33	9	10.9	0.23756
GO:0005254	chloride channel activity	7	2	2.31	0.23777
GO:0140096	catalytic activity, acting on a protein	1085	381	358.5	0.23795
GO:0016917	GABA receptor activity	9	7	2.97	0.23816
GO:0016783	sulfurtransferase activity	6	3	1.98	0.24358
GO:0004536	deoxyribonuclease activity	15	6	4.96	0.2445
GO:0016628	oxidoreductase activity, acting on the C...	14	7	4.63	0.24594
GO:0008026	ATP-dependent helicase activity	18	6	5.95	0.24926
GO:1901363	heterocyclic compound binding	2964	829	979.36	0.25166
GO:0005198	structural molecule activity	377	124	124.57	0.25697
GO:0019843	rRNA binding	13	5	4.3	0.26133
GO:0044877	macromolecular complex binding	62	26	20.49	0.26167
GO:0015079	potassium ion transmembrane transporter ...	35	14	11.56	0.26239
GO:0097159	organic cyclic compound binding	2966	830	980.02	0.2648
GO:0016638	oxidoreductase activity, acting on the C...	10	3	3.3	0.26786
GO:0016842	amidine-lyase activity	5	3	1.65	0.27052
GO:0050662	coenzyme binding	137	44	45.27	0.27158
GO:0005215	transporter activity	608	250	200.89	0.27838
GO:0004185	serine-type carboxypeptidase activity	7	3	2.31	0.27912
GO:0102965	alcohol-forming fatty acyl-CoA reductase...	23	9	7.6	0.28326
GO:0016853	isomerase activity	77	23	25.44	0.28739
GO:0015297	antiporter activity	17	11	5.62	0.29642
GO:0016836	hydro-lyase activity	35	17	11.56	0.2972
GO:0004143	diacylglycerol kinase activity	6	2	1.98	0.30415
GO:0051082	unfolded protein binding	28	9	9.25	0.30485
GO:0016742	hydroxymethyl-, formyl- and related tran...	6	3	1.98	0.31141
GO:0030554	adenyl nucleotide binding	788	270	260.37	0.31156
GO:0016709	oxidoreductase activity, acting on paire...	8	2	2.64	0.31201
GO:0008320	protein transmembrane transporter activi...	5	2	1.65	0.31406
GO:0030234	enzyme regulator activity	149	52	49.23	0.31501
GO:0005048	signal sequence binding	5	3	1.65	0.31807
GO:0008017	microtubule binding	49	18	16.19	0.32407
GO:0016831	carboxy-lyase activity	26	10	8.59	0.32501
GO:0051920	peroxiredoxin activity	6	2	1.98	0.32579
GO:0003755	peptidyl-prolyl cis-trans isomerase acti...	28	6	9.25	0.32719
GO:0004672	protein kinase activity	240	82	79.3	0.33139
GO:0016295	myristoyl-[acyl-carrier-protein] hydrola...	5	3	1.65	0.3318
GO:0016296	palmitoyl-[acyl-carrier-protein] hydrola...	5	3	1.65	0.3318
GO:0004320	oleoyl-[acyl-carrier-protein] hydrolase ...	5	3	1.65	0.3318
GO:0003777	microtubule motor activity	41	21	13.55	0.33891
GO:0008083	growth factor activity	13	4	4.3	0.34097
GO:0042803	protein homodimerization activity	6	3	1.98	0.34127
GO:0019888	protein phosphatase regulator activity	9	1	2.97	0.34153
GO:0004402	histone acetyltransferase activity	10	2	3.3	0.34374
GO:0008308	voltage-gated anion channel activity	5	1	1.65	0.34721
GO:0004866	endopeptidase inhibitor activity	43	18	14.21	0.34843
GO:0004527	exonuclease activity	29	9	9.58	0.34852
GO:0008146	sulfotransferase activity	23	8	7.6	0.35174
GO:0030674	protein binding, bridging	8	3	2.64	0.35179
GO:0016418	S-acetyltransferase activity	5	2	1.65	0.35237
GO:0046914	transition metal ion binding	930	256	307.29	0.35288
GO:0003746	translation elongation factor activity	21	9	6.94	0.35458
GO:0043169	cation binding	1796	552	593.43	0.35496
GO:0031418	L-ascorbic acid binding	6	3	1.98	0.35889
GO:0016615	malate dehydrogenase activity	5	2	1.65	0.36287
GO:0008312	7S RNA binding	6	3	1.98	0.36297
GO:0004448	isocitrate dehydrogenase activity	6	2	1.98	0.36565
GO:0019887	protein kinase regulator activity	19	6	6.28	0.3694
GO:0016646	oxidoreductase activity, acting on the C...	11	5	3.63	0.37035
GO:0003729	mRNA binding	25	11	8.26	0.37218
GO:0060090	molecular adaptor activity	17	8	5.62	0.37263
GO:0004556	alpha-amylase activity	6	3	1.98	0.37377
GO:0103025	alpha-amylase activity (releasing maltoh...	6	3	1.98	0.37377
GO:0102148	N-acetyl-beta-D-galactosaminidase activi...	5	3	1.65	0.37888
GO:0004563	beta-N-acetylhexosaminidase activity	5	3	1.65	0.37888
GO:0008408	3'-5' exonuclease activity	20	6	6.61	0.38382
GO:0090482	vitamin transmembrane transporter activi...	5	2	1.65	0.38644
GO:0019200	carbohydrate kinase activity	10	5	3.3	0.39197
GO:0004525	ribonuclease III activity	5	2	1.65	0.39592
GO:0045182	translation regulator activity	5	2	1.65	0.3965
GO:0048018	receptor ligand activity	44	12	14.54	0.39809
GO:0002161	aminoacyl-tRNA editing activity	7	2	2.31	0.40033
GO:0043022	ribosome binding	9	4	2.97	0.40205
GO:0003796	lysozyme activity	5	1	1.65	0.4023
GO:0016653	oxidoreductase activity, acting on NAD(P...	5	0	1.65	0.4055
GO:0042623	ATPase activity, coupled	122	48	40.31	0.40834
GO:0010181	FMN binding	8	2	2.64	0.40915
GO:0016830	carbon-carbon lyase activity	30	10	9.91	0.41065
GO:0000030	mannosyltransferase activity	16	3	5.29	0.42062
GO:0015631	tubulin binding	62	18	20.49	0.42495
GO:0016717	oxidoreductase activity, acting on paire...	7	2	2.31	0.4253
GO:0101005	ubiquitinyl hydrolase activity	36	10	11.9	0.426
GO:0008194	UDP-glycosyltransferase activity	56	13	18.5	0.42649
GO:0005539	glycosaminoglycan binding	7	3	2.31	0.42944
GO:0005085	guanyl-nucleotide exchange factor activi...	54	20	17.84	0.43085
GO:0022836	gated channel activity	90	40	29.74	0.43125
GO:0008276	protein methyltransferase activity	34	10	11.23	0.43293
GO:0070122	isopeptidase activity	9	2	2.97	0.43416
GO:0016861	intramolecular oxidoreductase activity, ...	7	3	2.31	0.43578
GO:0034061	DNA polymerase activity	9	2	2.97	0.43614
GO:0019213	deacetylase activity	7	2	2.31	0.43615
GO:0080019	fatty-acyl-CoA reductase (alcohol-formin...	26	10	8.59	0.44129
GO:0032403	protein complex binding	42	19	13.88	0.44341
GO:0015929	hexosaminidase activity	6	3	1.98	0.44601
GO:0005244	voltage-gated ion channel activity	35	13	11.56	0.4473
GO:0030151	molybdenum ion binding	5	2	1.65	0.45219
GO:0003682	chromatin binding	11	2	3.63	0.46455
GO:0016877	ligase activity, forming carbon-sulfur b...	13	5	4.3	0.46582
GO:0003951	NAD+ kinase activity	10	4	3.3	0.47202
GO:0016671	oxidoreductase activity, acting on a sul...	5	2	1.65	0.47467
GO:0016787	hydrolase activity	1614	612	533.29	0.4755
GO:0016616	oxidoreductase activity, acting on the C...	45	16	14.87	0.47597
GO:0008641	ubiquitin-like modifier activating enzym...	9	4	2.97	0.47724
GO:0008375	acetylglucosaminyltransferase activity	12	3	3.97	0.47887
GO:0019203	carbohydrate phosphatase activity	5	3	1.65	0.4789
GO:0019789	SUMO transferase activity	5	3	1.65	0.47953
GO:0048029	monosaccharide binding	11	5	3.63	0.48283
GO:1990837	sequence-specific double-stranded DNA bi...	11	8	3.63	0.4831
GO:0008745	N-acetylmuramoyl-L-alanine amidase activ...	6	2	1.98	0.48316
GO:0005543	phospholipid binding	43	12	14.21	0.48324
GO:0005524	ATP binding	782	268	258.39	0.48522
GO:0019901	protein kinase binding	7	3	2.31	0.48569
GO:0004559	alpha-mannosidase activity	10	2	3.3	0.49987
GO:0030276	clathrin binding	7	2	2.31	0.50778
GO:0004707	MAP kinase activity	5	2	1.65	0.50781
GO:0016796	exonuclease activity, active with either...	12	1	3.97	0.50829
GO:0003887	DNA-directed DNA polymerase activity	8	2	2.64	0.51432
GO:0004190	aspartic-type endopeptidase activity	12	5	3.97	0.51826
GO:0001671	ATPase activator activity	5	2	1.65	0.51874
GO:0004715	non-membrane spanning protein tyrosine k...	9	3	2.97	0.51957
GO:0047522	15-oxoprostaglandin 13-oxidase activity	5	2	1.65	0.51963
GO:0036132	13-prostaglandin reductase activity	5	2	1.65	0.51963
GO:0032440	2-alkenal reductase [NAD(P)] activity	5	2	1.65	0.51963
GO:0016667	oxidoreductase activity, acting on a sul...	22	11	7.27	0.52388
GO:0070403	NAD+ binding	6	2	1.98	0.52436
GO:0030170	pyridoxal phosphate binding	39	15	12.89	0.52568
GO:0004016	adenylate cyclase activity	6	2	1.98	0.52699
GO:0008324	cation transmembrane transporter activit...	196	83	64.76	0.52738
GO:0004312	fatty acid synthase activity	8	4	2.64	0.53246
GO:0008170	N-methyltransferase activity	39	9	12.89	0.53707
GO:0031406	carboxylic acid binding	9	4	2.97	0.53963
GO:0031409	pigment binding	9	2	2.97	0.54191
GO:0015103	inorganic anion transmembrane transporte...	23	11	7.6	0.54213
GO:0009982	pseudouridine synthase activity	9	2	2.97	0.54714
GO:0004315	3-oxoacyl-[acyl-carrier-protein] synthas...	6	3	1.98	0.54891
GO:0016706	oxidoreductase activity, acting on paire...	9	4	2.97	0.55411
GO:0004519	endonuclease activity	44	15	14.54	0.55472
GO:0016810	hydrolase activity, acting on carbon-nit...	52	21	17.18	0.55688
GO:0000166	nucleotide binding	1113	383	367.76	0.55775
GO:0015464	acetylcholine receptor activity	12	7	3.97	0.55903
GO:0019201	nucleotide kinase activity	6	2	1.98	0.55969
GO:0016829	lyase activity	119	47	39.32	0.56473
GO:0032549	ribonucleoside binding	178	68	58.81	0.56894
GO:0008173	RNA methyltransferase activity	33	4	10.9	0.56938
GO:0008081	phosphoric diester hydrolase activity	27	12	8.92	0.57103
GO:0003735	structural constituent of ribosome	141	39	46.59	0.57249
GO:0004721	phosphoprotein phosphatase activity	63	16	20.82	0.57688
GO:0048037	cofactor binding	186	62	61.46	0.58197
GO:0008565	protein transporter activity	16	7	5.29	0.58769
GO:0016462	pyrophosphatase activity	458	164	151.33	0.58794
GO:0003723	RNA binding	440	126	145.38	0.58873
GO:0004812	aminoacyl-tRNA ligase activity	44	11	14.54	0.59031
GO:0019206	nucleoside kinase activity	5	2	1.65	0.59083
GO:0046982	protein heterodimerization activity	32	8	10.57	0.59517
GO:0005096	GTPase activator activity	44	13	14.54	0.59781
GO:0016799	hydrolase activity, hydrolyzing N-glycos...	7	2	2.31	0.59842
GO:0004722	protein serine/threonine phosphatase act...	16	4	5.29	0.59864
GO:0046873	metal ion transmembrane transporter acti...	122	54	40.31	0.60452
GO:0004571	mannosyl-oligosaccharide 1,2-alpha-manno...	5	0	1.65	0.60467
GO:0016773	phosphotransferase activity, alcohol gro...	291	99	96.15	0.60811
GO:0003713	transcription coactivator activity	12	2	3.97	0.60981
GO:0008536	Ran GTPase binding	15	4	4.96	0.61139
GO:0016763	transferase activity, transferring pento...	15	3	4.96	0.61252
GO:0061630	ubiquitin protein ligase activity	26	3	8.59	0.61268
GO:0052689	carboxylic ester hydrolase activity	85	35	28.09	0.6185
GO:0003906	DNA-(apurinic or apyrimidinic site) lyas...	5	2	1.65	0.61975
GO:0061134	peptidase regulator activity	50	21	16.52	0.62013
GO:0008484	sulfuric ester hydrolase activity	9	4	2.97	0.62295
GO:0016790	thiolester hydrolase activity	13	7	4.3	0.62338
GO:0030551	cyclic nucleotide binding	5	2	1.65	0.62346
GO:0052866	phosphatidylinositol phosphate phosphata...	10	0	3.3	0.62621
GO:0004675	transmembrane receptor protein serine/th...	7	3	2.31	0.62825
GO:0036402	proteasome-activating ATPase activity	6	2	1.98	0.63235
GO:0004129	cytochrome-c oxidase activity	10	1	3.3	0.63428
GO:0000989	transcription factor activity, transcrip...	48	8	15.86	0.63483
GO:0004857	enzyme inhibitor activity	59	24	19.49	0.63606
GO:0016879	ligase activity, forming carbon-nitrogen...	25	11	8.26	0.63614
GO:0008188	neuropeptide receptor activity	16	3	5.29	0.64156
GO:0004601	peroxidase activity	22	6	7.27	0.64169
GO:0031072	heat shock protein binding	6	2	1.98	0.64643
GO:0016757	transferase activity, transferring glyco...	145	42	47.91	0.64661
GO:0017111	nucleoside-triphosphatase activity	444	160	146.71	0.64943
GO:0032561	guanyl ribonucleotide binding	178	68	58.81	0.65135
GO:0004702	signal transducer, downstream of recepto...	8	2	2.64	0.65347
GO:0019904	protein domain specific binding	17	5	5.62	0.65393
GO:0019706	protein-cysteine S-palmitoyltransferase ...	10	2	3.3	0.66018
GO:0051536	iron-sulfur cluster binding	55	12	18.17	0.66066
GO:0140103	catalytic activity, acting on a glycopro...	6	2	1.98	0.662
GO:0005184	neuropeptide hormone activity	12	5	3.97	0.66229
GO:0016538	cyclin-dependent protein serine/threonin...	13	3	4.3	0.6628
GO:0003712	transcription cofactor activity	47	8	15.53	0.6649
GO:0004535	poly(A)-specific ribonuclease activity	5	0	1.65	0.66868
GO:0046906	tetrapyrrole binding	175	62	57.82	0.66868
GO:0016779	nucleotidyltransferase activity	65	14	21.48	0.66909
GO:0016411	acylglycerol O-acyltransferase activity	10	5	3.3	0.66957
GO:0036094	small molecule binding	1178	410	389.23	0.67277
GO:0008047	enzyme activator activity	59	17	19.49	0.67571
GO:0016624	oxidoreductase activity, acting on the a...	6	3	1.98	0.68328
GO:0008175	tRNA methyltransferase activity	9	1	2.97	0.68797
GO:0009055	electron transfer activity	46	13	15.2	0.69289
GO:0004674	protein serine/threonine kinase activity	119	40	39.32	0.69301
GO:0008171	O-methyltransferase activity	14	3	4.63	0.69397
GO:0005261	cation channel activity	90	34	29.74	0.695
GO:0043021	ribonucleoprotein complex binding	17	6	5.62	0.6954
GO:0008528	G-protein coupled peptide receptor activ...	27	6	8.92	0.70072
GO:0004521	endoribonuclease activity	21	7	6.94	0.7057
GO:0097367	carbohydrate derivative binding	1069	371	353.22	0.70589
GO:0017016	Ras GTPase binding	45	18	14.87	0.70741
GO:0008241	peptidyl-dipeptidase activity	7	2	2.31	0.70962
GO:0031369	translation initiation factor binding	5	2	1.65	0.71669
GO:0008417	fucosyltransferase activity	6	2	1.98	0.71676
GO:0004520	endodeoxyribonuclease activity	11	4	3.63	0.71843
GO:0003899	DNA-directed 5'-3' RNA polymerase activi...	31	5	10.24	0.72113
GO:0005544	calcium-dependent phospholipid binding	10	4	3.3	0.72513
GO:0015291	secondary active transmembrane transport...	61	40	20.16	0.72632
GO:0016859	cis-trans isomerase activity	29	6	9.58	0.72634
GO:0008168	methyltransferase activity	109	29	36.02	0.72663
GO:0003690	double-stranded DNA binding	24	10	7.93	0.72693
GO:0038023	signaling receptor activity	240	100	79.3	0.73118
GO:0005548	phospholipid transporter activity	10	2	3.3	0.733
GO:0003697	single-stranded DNA binding	13	3	4.3	0.73342
GO:0004376	glycolipid mannosyltransferase activity	5	1	1.65	0.73672
GO:0004003	ATP-dependent DNA helicase activity	13	3	4.3	0.73787
GO:0008094	DNA-dependent ATPase activity	21	6	6.94	0.74805
GO:0004526	ribonuclease P activity	6	2	1.98	0.75048
GO:0003993	acid phosphatase activity	7	1	2.31	0.75181
GO:0016896	exoribonuclease activity, producing 5'-p...	9	0	2.97	0.75347
GO:0019900	kinase binding	8	3	2.64	0.76192
GO:0004713	protein tyrosine kinase activity	31	11	10.24	0.76202
GO:0070566	adenylyltransferase activity	8	3	2.64	0.76415
GO:0017056	structural constituent of nuclear pore	12	2	3.97	0.76417
GO:0016641	oxidoreductase activity, acting on the C...	5	1	1.65	0.7642
GO:0030695	GTPase regulator activity	46	14	15.2	0.76632
GO:0016782	transferase activity, transferring sulfu...	35	13	11.56	0.76819
GO:0004197	cysteine-type endopeptidase activity	24	9	7.93	0.76977
GO:0031683	G-protein beta/gamma-subunit complex bin...	6	2	1.98	0.77859
GO:0009975	cyclase activity	23	6	7.6	0.78347
GO:0042626	ATPase activity, coupled to transmembran...	68	24	22.47	0.7916
GO:0032559	adenyl ribonucleotide binding	786	269	259.71	0.79378
GO:0000179	rRNA (adenine-N6,N6-)-dimethyltransferas...	6	1	1.98	0.79459
GO:0016765	transferase activity, transferring alkyl...	25	11	8.26	0.7946
GO:0016894	endonuclease activity, active with eithe...	6	2	1.98	0.79585
GO:0016868	intramolecular transferase activity, pho...	6	2	1.98	0.80193
GO:0051213	dioxygenase activity	21	7	6.94	0.80461
GO:0036459	thiol-dependent ubiquitinyl hydrolase ac...	35	10	11.56	0.80947
GO:0016741	transferase activity, transferring one-c...	116	32	38.33	0.81507
GO:0003678	DNA helicase activity	32	6	10.57	0.81883
GO:0008318	protein prenyltransferase activity	6	1	1.98	0.82333
GO:0051537	2 iron, 2 sulfur cluster binding	21	6	6.94	0.82425
GO:0016651	oxidoreductase activity, acting on NAD(P...	27	2	8.92	0.83113
GO:0016846	carbon-sulfur lyase activity	5	1	1.65	0.83315
GO:0005487	nucleocytoplasmic transporter activity	5	2	1.65	0.8425
GO:0008137	NADH dehydrogenase (ubiquinone) activity	13	0	4.3	0.84384
GO:0050661	NADP binding	22	5	7.27	0.8444
GO:0016407	acetyltransferase activity	43	11	14.21	0.84612
GO:0000049	tRNA binding	23	8	7.6	0.84633
GO:0003916	DNA topoisomerase activity	5	1	1.65	0.84708
GO:0005488	binding	5704	1776	1884.7	0.84797
GO:0004298	threonine-type endopeptidase activity	15	0	4.96	0.84946
GO:0016849	phosphorus-oxygen lyase activity	24	7	7.93	0.85089
GO:0016301	kinase activity	351	123	115.98	0.8513
GO:0008649	rRNA methyltransferase activity	9	2	2.97	0.85211
GO:0005044	scavenger receptor activity	7	2	2.31	0.85231
GO:0022804	active transmembrane transporter activit...	131	65	43.28	0.85284
GO:0072341	modified amino acid binding	8	4	2.64	0.85361
GO:0008061	chitin binding	91	29	30.07	0.85405
GO:0016433	rRNA (adenine) methyltransferase activit...	7	1	2.31	0.85595
GO:0046527	glucosyltransferase activity	8	1	2.64	0.85764
GO:0016801	hydrolase activity, acting on ether bond...	5	2	1.65	0.85924
GO:0043130	ubiquitin binding	6	0	1.98	0.86072
GO:0004725	protein tyrosine phosphatase activity	36	10	11.9	0.86396
GO:0015276	ligand-gated ion channel activity	56	29	18.5	0.86467
GO:0034979	NAD-dependent protein deacetylase activi...	5	1	1.65	0.86988
GO:0018024	histone-lysine N-methyltransferase activ...	12	1	3.97	0.8764
GO:0000287	magnesium ion binding	41	12	13.55	0.87829
GO:0004826	phenylalanine-tRNA ligase activity	7	1	2.31	0.87923
GO:0004386	helicase activity	106	29	35.02	0.87953
GO:0060089	molecular transducer activity	263	106	86.9	0.88224
GO:0016740	transferase activity	1059	339	349.91	0.88459
GO:0003743	translation initiation factor activity	47	10	15.53	0.8846
GO:0008409	5'-3' exonuclease activity	6	2	1.98	0.88489
GO:0004842	ubiquitin-protein transferase activity	64	14	21.15	0.88916
GO:0004549	tRNA-specific ribonuclease activity	9	2	2.97	0.89217
GO:0019001	guanyl nucleotide binding	179	68	59.14	0.89259
GO:0000339	RNA cap binding	5	1	1.65	0.89348
GO:0008134	transcription factor binding	15	5	4.96	0.89355
GO:0005179	hormone activity	27	7	8.92	0.89489
GO:0016884	carbon-nitrogen ligase activity, with gl...	8	3	2.64	0.89538
GO:0016854	racemase and epimerase activity	7	1	2.31	0.89664
GO:0004983	neuropeptide Y receptor activity	9	2	2.97	0.89902
GO:0005089	Rho guanyl-nucleotide exchange factor ac...	10	2	3.3	0.90449
GO:0035251	UDP-glucosyltransferase activity	5	1	1.65	0.90726
GO:0140101	catalytic activity, acting on a tRNA	82	20	27.09	0.91092
GO:0008135	translation factor activity, RNA binding	70	17	23.13	0.91226
GO:0005201	extracellular matrix structural constitu...	5	1	1.65	0.91277
GO:0008092	cytoskeletal protein binding	162	64	53.53	0.91782
GO:1901505	carbohydrate derivative transmembrane tr...	29	9	9.58	0.91813
GO:0015932	nucleobase-containing compound transmemb...	28	9	9.25	0.92045
GO:0005338	nucleotide-sugar transmembrane transport...	5	0	1.65	0.9206
GO:0016874	ligase activity	91	33	30.07	0.92072
GO:0008174	mRNA methyltransferase activity	6	0	1.98	0.92081
GO:0017069	snRNA binding	5	0	1.65	0.92279
GO:0016747	transferase activity, transferring acyl ...	138	44	45.6	0.92286
GO:0016417	S-acyltransferase activity	17	4	5.62	0.92351
GO:0004176	ATP-dependent peptidase activity	5	1	1.65	0.92492
GO:0004518	nuclease activity	75	24	24.78	0.9255
GO:0016780	phosphotransferase activity, for other s...	11	2	3.63	0.92974
GO:0008199	ferric iron binding	8	1	2.64	0.93006
GO:0004322	ferroxidase activity	8	1	2.64	0.93006
GO:0000981	RNA polymerase II transcription factor a...	77	14	25.44	0.94569
GO:0004540	ribonuclease activity	33	7	10.9	0.95149
GO:0034593	phosphatidylinositol bisphosphate phosph...	7	0	2.31	0.95361
GO:0043015	gamma-tubulin binding	5	0	1.65	0.95472
GO:0044212	transcription regulatory region DNA bind...	11	8	3.63	0.95548
GO:0003725	double-stranded RNA binding	5	1	1.65	0.95839
GO:0051539	4 iron, 4 sulfur cluster binding	27	4	8.92	0.95891
GO:0042802	identical protein binding	9	4	2.97	0.96029
GO:0030983	mismatched DNA binding	5	1	1.65	0.9609
GO:0016715	oxidoreductase activity, acting on paire...	6	2	1.98	0.96232
GO:0008514	organic anion transmembrane transporter ...	20	9	6.61	0.96472
GO:0016645	oxidoreductase activity, acting on the C...	13	5	4.3	0.96601
GO:0016634	oxidoreductase activity, acting on the C...	6	1	1.98	0.96733
GO:0015020	glucuronosyltransferase activity	24	2	7.93	0.96741
GO:0004984	olfactory receptor activity	14	2	4.63	0.96893
GO:0043565	sequence-specific DNA binding	172	39	56.83	0.97102
GO:0003724	RNA helicase activity	55	19	18.17	0.97201
GO:0000175	3'-5'-exoribonuclease activity	8	0	2.64	0.97341
GO:0008757	S-adenosylmethionine-dependent methyltra...	60	15	19.83	0.97402
GO:0008195	phosphatidate phosphatase activity	5	1	1.65	0.97415
GO:0003954	NADH dehydrogenase activity	14	0	4.63	0.97466
GO:0071949	FAD binding	25	7	8.26	0.97517
GO:0016891	endoribonuclease activity, producing 5'-...	13	4	4.3	0.97633
GO:0004383	guanylate cyclase activity	14	4	4.63	0.97826
GO:0072509	divalent inorganic cation transmembrane ...	28	14	9.25	0.97914
GO:1901981	phosphatidylinositol phosphate binding	7	1	2.31	0.97942
GO:0051287	NAD binding	38	7	12.56	0.97979
GO:0016627	oxidoreductase activity, acting on the C...	45	14	14.87	0.98084
GO:0051183	vitamin transporter activity	7	2	2.31	0.98226
GO:0022891	substrate-specific transmembrane transpo...	311	131	102.76	0.9825
GO:0046872	metal ion binding	1790	549	591.45	0.98301
GO:0140097	catalytic activity, acting on DNA	74	18	24.45	0.98468
GO:0003700	DNA binding transcription factor activit...	249	59	82.27	0.98518
GO:0016835	carbon-oxygen lyase activity	41	19	13.55	0.98783
GO:0003677	DNA binding	603	138	199.24	0.98788
GO:0000988	transcription factor activity, protein b...	49	8	16.19	0.98893
GO:0140098	catalytic activity, acting on RNA	220	52	72.69	0.98925
GO:0008270	zinc ion binding	711	175	234.93	0.98942
GO:0000062	fatty-acyl-CoA binding	5	1	1.65	0.98978
GO:0043492	ATPase activity, coupled to movement of ...	69	24	22.8	0.9906
GO:0005272	sodium channel activity	27	7	8.92	0.99097
GO:0003684	damaged DNA binding	15	4	4.96	0.99103
GO:0015075	ion transmembrane transporter activity	296	129	97.8	0.99159
GO:0003714	transcription corepressor activity	10	1	3.3	0.99303
GO:0140102	catalytic activity, acting on a rRNA	10	2	3.3	0.99572
GO:0005484	SNAP receptor activity	8	1	2.64	0.99641
GO:0016772	transferase activity, transferring phosp...	433	140	143.07	0.99687
GO:0042054	histone methyltransferase activity	13	1	4.3	0.99698
GO:0016274	protein-arginine N-methyltransferase act...	12	3	3.97	0.99702
GO:0008374	O-acyltransferase activity	17	6	5.62	0.99778
GO:0070008	serine-type exopeptidase activity	8	3	2.64	0.99787
GO:0008527	taste receptor activity	5	0	1.65	0.99884
GO:0019783	ubiquitin-like protein-specific protease...	36	10	11.9	0.99885
GO:0008080	N-acetyltransferase activity	35	9	11.56	0.99915
GO:0042277	peptide binding	9	3	2.97	0.99942
GO:0046983	protein dimerization activity	116	27	38.33	0.99994
GO:0016410	N-acyltransferase activity	37	9	12.23	0.99999
GO:0031625	ubiquitin protein ligase binding	7	0	2.31	1
GO:0043167	ion binding	2799	908	924.84	1
GO:0016721	oxidoreductase activity, acting on super...	7	4	2.31	1
GO:0016722	oxidoreductase activity, oxidizing metal...	8	1	2.64	1
GO:0098960	postsynaptic neurotransmitter receptor a...	10	6	3.3	1
GO:0015077	monovalent inorganic cation transmembran...	130	54	42.95	1
GO:0016724	oxidoreductase activity, oxidizing metal...	8	1	2.64	1
GO:0032182	ubiquitin-like protein binding	6	0	1.98	1
GO:0038024	cargo receptor activity	7	2	2.31	1
GO:0015197	peptide transporter activity	16	7	5.29	1
GO:0016160	amylase activity	6	3	1.98	1
GO:1901265	nucleoside phosphate binding	1113	383	367.76	1
GO:0019207	kinase regulator activity	19	6	6.28	1
GO:0017171	serine hydrolase activity	310	116	102.43	1
GO:0061135	endopeptidase regulator activity	43	18	14.21	1
GO:0043177	organic acid binding	9	4	2.97	1
GO:0140110	transcription regulator activity	296	66	97.8	1
GO:0070279	vitamin B6 binding	39	15	12.89	1
GO:0061659	ubiquitin-like protein ligase activity	26	3	8.59	1
GO:0022890	inorganic cation transmembrane transport...	178	77	58.81	1
GO:0008238	exopeptidase activity	96	50	31.72	1
GO:0005253	anion channel activity	9	2	2.97	1
GO:0022892	substrate-specific transporter activity	347	142	114.66	1
GO:0044389	ubiquitin-like protein ligase binding	7	0	2.31	1
GO:0015399	primary active transmembrane transporter...	69	25	22.8	1
GO:0004532	exoribonuclease activity	9	0	2.97	1
GO:0015002	heme-copper terminal oxidase activity	10	1	3.3	1
GO:0015116	sulfate transmembrane transporter activi...	10	5	3.3	1
GO:0016655	oxidoreductase activity, acting on NAD(P...	13	0	4.3	1
GO:0022884	macromolecule transmembrane transporter ...	5	2	1.65	1
GO:0001067	regulatory region nucleic acid binding	11	8	3.63	1
GO:0019787	ubiquitin-like protein transferase activ...	69	17	22.8	1
GO:0019199	transmembrane receptor protein kinase ac...	15	8	4.96	1
GO:0016893	endonuclease activity, active with eithe...	21	7	6.94	1
GO:0005231	excitatory extracellular ligand-gated io...	10	6	3.3	1
GO:0016684	oxidoreductase activity, acting on perox...	22	6	7.27	1
GO:0030594	neurotransmitter receptor activity	30	16	9.91	1
GO:0060589	nucleoside-triphosphatase regulator acti...	55	18	18.17	1
GO:0016675	oxidoreductase activity, acting on a hem...	10	1	3.3	1
GO:0016676	oxidoreductase activity, acting on a hem...	10	1	3.3	1
GO:0022824	transmitter-gated ion channel activity	28	15	9.25	1
GO:0015370	solute:sodium symporter activity	19	13	6.28	1
GO:0008066	glutamate receptor activity	18	9	5.95	1
GO:0032296	double-stranded RNA-specific ribonucleas...	5	2	1.65	1
GO:0042625	ATPase coupled ion transmembrane transpo...	19	10	6.28	1
GO:0004175	endopeptidase activity	400	145	132.17	1
GO:0004697	protein kinase C activity	5	2	1.65	1
GO:1901567	fatty acid derivative binding	5	1	1.65	1
GO:0016866	intramolecular transferase activity	15	4	4.96	1
GO:0022843	voltage-gated cation channel activity	24	10	7.93	1
GO:0000295	adenine nucleotide transmembrane transpo...	19	9	6.28	1
GO:0004112	cyclic-nucleotide phosphodiesterase acti...	11	7	3.63	1
GO:0001012	RNA polymerase II regulatory region DNA ...	6	5	1.98	1
GO:0022832	voltage-gated channel activity	35	13	11.56	1
GO:0022834	ligand-gated channel activity	56	29	18.5	1
GO:0022835	transmitter-gated channel activity	28	15	9.25	1
GO:0099600	transmembrane receptor activity	226	93	74.67	1
GO:0022838	substrate-specific channel activity	156	65	51.55	1
GO:0016297	acyl-[acyl-carrier-protein] hydrolase ac...	5	3	1.65	1
GO:0042887	amide transmembrane transporter activity	5	2	1.65	1
GO:0034212	peptide N-acetyltransferase activity	11	3	3.63	1
GO:0016820	hydrolase activity, acting on acid anhyd...	68	24	22.47	1
GO:0015298	solute:cation antiporter activity	8	6	2.64	1
GO:0022803	passive transmembrane transporter activi...	164	70	54.19	1
GO:0031267	small GTPase binding	45	18	14.87	1
GO:0098531	transcription factor activity, direct li...	7	3	2.31	1
GO:0019707	protein-cysteine S-acyltransferase activ...	10	2	3.3	1
GO:0016817	hydrolase activity, acting on acid anhyd...	462	167	152.65	1
GO:0008509	anion transmembrane transporter activity	45	20	14.87	1
GO:0005057	signal transducer activity, downstream o...	8	2	2.64	1
GO:0070011	peptidase activity, acting on L-amino ac...	577	224	190.65	1
GO:0009931	calcium-dependent protein serine/threoni...	5	2	1.65	1
GO:0015605	organophosphate ester transmembrane tran...	19	9	6.28	1
GO:0003674	molecular_function	8347	2758	2758	1
GO:0003676	nucleic acid binding	1809	413	597.73	1
GO:0016273	arginine N-methyltransferase activity	12	3	3.97	1
GO:0016278	lysine N-methyltransferase activity	16	4	5.29	1
GO:0000975	regulatory region DNA binding	11	8	3.63	1
GO:0070035	purine NTP-dependent helicase activity	18	6	5.95	1
GO:0050136	NADH dehydrogenase (quinone) activity	13	0	4.3	1
GO:0001653	peptide receptor activity	27	6	8.92	1
GO:0004871	signal transducer activity	248	102	81.94	1
GO:0004872	receptor activity	257	105	84.92	1
GO:0035639	purine ribonucleoside triphosphate bindi...	951	333	314.23	1
GO:0097747	RNA polymerase activity	31	5	10.24	1
GO:1904680	peptide transmembrane transporter activi...	5	2	1.65	1
GO:0070001	aspartic-type peptidase activity	12	5	3.97	1
GO:0070003	threonine-type peptidase activity	15	0	4.96	1
GO:0015215	nucleotide transmembrane transporter act...	19	9	6.28	1
GO:0015216	purine nucleotide transmembrane transpor...	19	9	6.28	1
GO:0015923	mannosidase activity	10	2	3.3	1
GO:0033558	protein deacetylase activity	5	1	1.65	1
GO:0015924	mannosyl-oligosaccharide mannosidase act...	5	0	1.65	1
GO:0034062	5'-3' RNA polymerase activity	31	5	10.24	1
GO:0051540	metal cluster binding	55	12	18.17	1
GO:1904315	transmitter-gated ion channel activity i...	10	6	3.3	1
GO:0032550	purine ribonucleoside binding	175	67	57.82	1
GO:0032553	ribonucleotide binding	963	336	318.19	1
GO:0032555	purine ribonucleotide binding	955	334	315.55	1
GO:0051020	GTPase binding	87	34	28.75	1
GO:0001883	purine nucleoside binding	175	67	57.82	1
GO:0016903	oxidoreductase activity, acting on the a...	46	19	15.2	1
GO:0010857	calcium-dependent protein kinase activit...	5	2	1.65	1
GO:0061783	peptidoglycan muralytic activity	11	3	3.63	1
GO:0099529	neurotransmitter receptor activity invol...	10	6	3.3	1
GO:0044769	ATPase activity, coupled to transmembran...	14	7	4.63	1
GO:1901682	sulfur compound transmembrane transporte...	10	5	3.3	1
GO:0005326	neurotransmitter transporter activity	19	13	6.28	1
GO:0017076	purine nucleotide binding	958	335	316.54	1
GO:0016769	transferase activity, transferring nitro...	14	7	4.63	1
GO:0036442	hydrogen-exporting ATPase activity	8	7	2.64	1
GO:0005346	purine ribonucleotide transmembrane tran...	19	9	6.28	1
GO:1990939	ATP-dependent microtubule motor activity	12	10	3.97	1

## Sheet: GO Enrichment CC
GO.ID	Term	Annotated	Significant	Expected	weight01KS
GO:0016021	integral component of membrane	2259	847	723.97	1.1e-13
GO:0033180	proton-transporting V-type ATPase, V1 do...	9	9	2.88	7.7e-06
GO:0005874	microtubule	80	37	25.64	0.0014
GO:0030054	cell junction	61	34	19.55	0.0024
GO:0005858	axonemal dynein complex	5	4	1.6	0.0041
GO:0005856	cytoskeleton	246	111	78.84	0.0089
GO:0033179	proton-transporting V-type ATPase, V0 do...	8	6	2.56	0.0115
GO:0030286	dynein complex	25	16	8.01	0.0131
GO:0045211	postsynaptic membrane	19	12	6.09	0.0174
GO:0016471	vacuolar proton-transporting V-type ATPa...	6	4	1.92	0.0175
GO:0016020	membrane	2700	994	865.3	0.0207
GO:0005737	cytoplasm	1533	479	491.3	0.021
GO:0005911	cell-cell junction	10	6	3.2	0.0214
GO:0005576	extracellular region	323	126	103.52	0.029
GO:0005930	axoneme	9	7	2.88	0.034
GO:0016514	SWI/SNF complex	6	3	1.92	0.0372
GO:0016459	myosin complex	20	11	6.41	0.0374
GO:0005887	integral component of plasma membrane	35	14	11.22	0.0424
GO:0042383	sarcolemma	6	4	1.92	0.0437
GO:0005788	endoplasmic reticulum lumen	15	8	4.81	0.0502
GO:0005615	extracellular space	50	22	16.02	0.0544
GO:0031514	motile cilium	9	5	2.88	0.0679
GO:0030014	CCR4-NOT complex	9	3	2.88	0.0744
GO:0015935	small ribosomal subunit	19	8	6.09	0.0825
GO:0098800	inner mitochondrial membrane protein com...	33	4	10.58	0.0836
GO:0008287	protein serine/threonine phosphatase com...	8	1	2.56	0.0892
GO:0097458	neuron part	18	6	5.77	0.0965
GO:0005912	adherens junction	17	8	5.45	0.0981
GO:0030126	COPI vesicle coat	5	2	1.6	0.1097
GO:0000786	nucleosome	24	7	7.69	0.1151
GO:0015629	actin cytoskeleton	47	18	15.06	0.1208
GO:0031012	extracellular matrix	10	6	3.2	0.1216
GO:0031090	organelle membrane	332	88	106.4	0.1221
GO:0034703	cation channel complex	19	8	6.09	0.1251
GO:0005929	cilium	59	29	18.91	0.128
GO:0099503	secretory vesicle	6	3	1.92	0.138
GO:0005938	cell cortex	11	4	3.53	0.1491
GO:0044456	synapse part	27	15	8.65	0.1542
GO:0033178	proton-transporting two-sector ATPase co...	17	11	5.45	0.1594
GO:0030176	integral component of endoplasmic reticu...	21	6	6.73	0.166
GO:0016010	dystrophin-associated glycoprotein compl...	7	2	2.24	0.1693
GO:0005758	mitochondrial intermembrane space	14	7	4.49	0.1702
GO:0031410	cytoplasmic vesicle	99	28	31.73	0.1825
GO:0008305	integrin complex	5	1	1.6	0.1854
GO:0005761	mitochondrial ribosome	14	5	4.49	0.1959
GO:0005886	plasma membrane	325	118	104.16	0.1984
GO:0098533	ATPase dependent transmembrane transport...	6	3	1.92	0.2129
GO:0005891	voltage-gated calcium channel complex	6	3	1.92	0.2142
GO:0005875	microtubule associated complex	37	19	11.86	0.2204
GO:0042025	host cell nucleus	86	24	27.56	0.2216
GO:0045261	proton-transporting ATP synthase complex...	7	1	2.24	0.2236
GO:0012507	ER to Golgi transport vesicle membrane	5	2	1.6	0.2279
GO:0098588	bounding membrane of organelle	188	58	60.25	0.2296
GO:0000124	SAGA complex	9	1	2.88	0.2297
GO:0015934	large ribosomal subunit	17	3	5.45	0.2542
GO:0000502	proteasome complex	33	6	10.58	0.2559
GO:0030139	endocytic vesicle	5	1	1.6	0.2577
GO:0030658	transport vesicle membrane	15	5	4.81	0.2725
GO:0031010	ISWI-type complex	5	1	1.6	0.2756
GO:0031301	integral component of organelle membrane	13	4	4.17	0.2807
GO:0031901	early endosome membrane	7	1	2.24	0.2812
GO:0019898	extrinsic component of membrane	9	2	2.88	0.2852
GO:0005787	signal peptidase complex	5	2	1.6	0.292
GO:0015630	microtubule cytoskeleton	129	57	41.34	0.292
GO:0071565	nBAF complex	5	1	1.6	0.2927
GO:0030016	myofibril	7	2	2.24	0.2951
GO:0120038	plasma membrane bounded cell projection ...	23	12	7.37	0.3001
GO:0098794	postsynapse	20	13	6.41	0.3004
GO:0005905	clathrin-coated pit	7	2	2.24	0.3035
GO:0030125	clathrin vesicle coat	7	1	2.24	0.3035
GO:0043226	organelle	2756	715	883.25	0.3042
GO:0043235	receptor complex	6	2	1.92	0.3104
GO:0098590	plasma membrane region	23	14	7.37	0.3201
GO:0030867	rough endoplasmic reticulum membrane	6	2	1.92	0.3243
GO:0044445	cytosolic part	15	3	4.81	0.3248
GO:0005819	spindle	18	6	5.77	0.3277
GO:0030663	COPI-coated vesicle membrane	6	3	1.92	0.3289
GO:0008250	oligosaccharyltransferase complex	5	2	1.6	0.3341
GO:0005732	small nucleolar ribonucleoprotein comple...	6	1	1.92	0.3376
GO:0031225	anchored component of membrane	23	9	7.37	0.3459
GO:0000790	nuclear chromatin	31	7	9.93	0.3469
GO:0005786	signal recognition particle, endoplasmic...	6	3	1.92	0.3517
GO:0005685	U1 snRNP	6	2	1.92	0.3549
GO:0000139	Golgi membrane	84	27	26.92	0.3625
GO:0042175	nuclear outer membrane-endoplasmic retic...	160	54	51.28	0.3632
GO:0030660	Golgi-associated vesicle membrane	15	6	4.81	0.3643
GO:0005768	endosome	59	14	18.91	0.3664
GO:0035267	NuA4 histone acetyltransferase complex	7	3	2.24	0.3673
GO:0033588	Elongator holoenzyme complex	5	2	1.6	0.3699
GO:0070603	SWI/SNF superfamily-type complex	27	6	8.65	0.3707
GO:0042995	cell projection	73	35	23.4	0.373
GO:0044441	ciliary part	22	11	7.05	0.3794
GO:0000932	P-body	8	2	2.56	0.3813
GO:0070161	anchoring junction	18	9	5.77	0.382
GO:0044459	plasma membrane part	81	36	25.96	0.383
GO:0044452	nucleolar part	7	3	2.24	0.3876
GO:0044447	axoneme part	7	5	2.24	0.3908
GO:0097525	spliceosomal snRNP complex	15	2	4.81	0.4028
GO:0072546	ER membrane protein complex	5	1	1.6	0.4042
GO:0030120	vesicle coat	16	4	5.13	0.4082
GO:0030665	clathrin-coated vesicle membrane	8	1	2.56	0.4083
GO:0030119	AP-type membrane coat adaptor complex	10	2	3.2	0.41
GO:0036464	cytoplasmic ribonucleoprotein granule	11	2	3.53	0.4194
GO:1990391	DNA repair complex	7	2	2.24	0.4195
GO:0044422	organelle part	1131	314	362.46	0.4274
GO:0031982	vesicle	101	29	32.37	0.4325
GO:1990904	ribonucleoprotein complex	271	62	86.85	0.4347
GO:0005778	peroxisomal membrane	9	3	2.88	0.4377
GO:0090575	RNA polymerase II transcription factor c...	23	5	7.37	0.4385
GO:0030133	transport vesicle	16	5	5.13	0.4524
GO:0005869	dynactin complex	6	2	1.92	0.4561
GO:0016591	DNA-directed RNA polymerase II, holoenzy...	37	8	11.86	0.4695
GO:0005741	mitochondrial outer membrane	21	5	6.73	0.4706
GO:0005667	transcription factor complex	38	9	12.18	0.4772
GO:0034702	ion channel complex	23	9	7.37	0.4892
GO:0045263	proton-transporting ATP synthase complex...	9	0	2.88	0.4965
GO:0098791	Golgi subcompartment	91	29	29.16	0.5024
GO:0030117	membrane coat	25	7	8.01	0.5046
GO:0030529	intracellular ribonucleoprotein complex	262	59	83.97	0.5189
GO:0032592	integral component of mitochondrial memb...	7	2	2.24	0.5222
GO:0019867	outer membrane	22	5	7.05	0.5252
GO:0030136	clathrin-coated vesicle	11	1	3.53	0.5286
GO:0005838	proteasome regulatory particle	5	1	1.6	0.529
GO:0031305	integral component of mitochondrial inne...	6	2	1.92	0.5566
GO:0046540	U4/U6 x U5 tri-snRNP complex	8	1	2.56	0.5656
GO:0005789	endoplasmic reticulum membrane	159	53	50.96	0.5743
GO:0005774	vacuolar membrane	26	10	8.33	0.577
GO:1902494	catalytic complex	277	60	88.77	0.5815
GO:0005759	mitochondrial matrix	36	13	11.54	0.5855
GO:0005813	centrosome	9	3	2.88	0.5872
GO:0005815	microtubule organizing center	38	12	12.18	0.5874
GO:0031981	nuclear lumen	247	50	79.16	0.5896
GO:0016272	prefoldin complex	8	3	2.56	0.5924
GO:0042555	MCM complex	6	0	1.92	0.6
GO:0098797	plasma membrane protein complex	22	6	7.05	0.602
GO:0012505	endomembrane system	424	127	135.88	0.6038
GO:0044451	nucleoplasm part	136	25	43.59	0.606
GO:0030659	cytoplasmic vesicle membrane	30	9	9.61	0.6119
GO:0044446	intracellular organelle part	1120	312	358.94	0.6123
GO:0097346	INO80-type complex	11	1	3.53	0.6124
GO:0044815	DNA packaging complex	26	8	8.33	0.613
GO:0044431	Golgi apparatus part	102	32	32.69	0.613
GO:0005654	nucleoplasm	153	29	49.03	0.62
GO:0036452	ESCRT complex	8	1	2.56	0.6252
GO:1990351	transporter complex	32	12	10.26	0.6303
GO:0005783	endoplasmic reticulum	210	70	67.3	0.6371
GO:0055037	recycling endosome	5	1	1.6	0.6375
GO:0030131	clathrin adaptor complex	8	2	2.56	0.6408
GO:0008076	voltage-gated potassium channel complex	9	3	2.88	0.6419
GO:0008023	transcription elongation factor complex	12	3	3.85	0.6447
GO:0070461	SAGA-type complex	11	1	3.53	0.6464
GO:0031965	nuclear membrane	15	3	4.81	0.6513
GO:0061695	transferase complex, transferring phosph...	55	10	17.63	0.6586
GO:0042575	DNA polymerase complex	6	1	1.92	0.6646
GO:0044450	microtubule organizing center part	10	3	3.2	0.6701
GO:0016592	mediator complex	25	5	8.01	0.6741
GO:0032991	macromolecular complex	1023	244	327.85	0.6812
GO:1990204	oxidoreductase complex	20	3	6.41	0.6859
GO:0032993	protein-DNA complex	28	8	8.97	0.6949
GO:0022624	proteasome accessory complex	6	1	1.92	0.7091
GO:0019773	proteasome core complex, alpha-subunit c...	7	0	2.24	0.7104
GO:0005680	anaphase-promoting complex	8	0	2.56	0.711
GO:0030880	RNA polymerase complex	45	9	14.42	0.7128
GO:0044433	cytoplasmic vesicle part	68	15	21.79	0.7144
GO:0005885	Arp2/3 protein complex	8	2	2.56	0.7165
GO:0048188	Set1C/COMPASS complex	6	2	1.92	0.7227
GO:0045202	synapse	38	18	12.18	0.7231
GO:0030684	preribosome	14	3	4.49	0.7254
GO:0098798	mitochondrial protein complex	37	5	11.86	0.7274
GO:0005675	holo TFIIH complex	5	1	1.6	0.7326
GO:0044427	chromosomal part	102	21	32.69	0.7333
GO:0005666	DNA-directed RNA polymerase III complex	8	1	2.56	0.7337
GO:0016528	sarcoplasm	5	1	1.6	0.7376
GO:0005669	transcription factor TFIID complex	10	2	3.2	0.7388
GO:1990234	transferase complex	132	22	42.3	0.7405
GO:0017053	transcriptional repressor complex	7	0	2.24	0.7425
GO:0098793	presynapse	7	1	2.24	0.7474
GO:0048471	perinuclear region of cytoplasm	12	4	3.85	0.7477
GO:0005814	centriole	7	2	2.24	0.7556
GO:0044444	cytoplasmic part	1031	287	330.42	0.757
GO:0099513	polymeric cytoskeletal fiber	83	37	26.6	0.7575
GO:0000228	nuclear chromosome	44	8	14.1	0.7593
GO:0000776	kinetochore	8	2	2.56	0.7607
GO:0005840	ribosome	165	42	52.88	0.7643
GO:0000785	chromatin	56	14	17.95	0.7664
GO:0016607	nuclear speck	12	2	3.85	0.7818
GO:0005740	mitochondrial envelope	144	31	46.15	0.7919
GO:0017119	Golgi transport complex	6	2	1.92	0.7949
GO:0070469	respiratory chain	37	3	11.86	0.8006
GO:0031966	mitochondrial membrane	133	26	42.62	0.807
GO:0032039	integrator complex	8	2	2.56	0.809
GO:0044424	intracellular part	3156	849	1011.44	0.8108
GO:0005921	gap junction	6	2	1.92	0.8124
GO:0000775	chromosome, centromeric region	12	2	3.85	0.8137
GO:0000151	ubiquitin ligase complex	24	2	7.69	0.8156
GO:0005795	Golgi stack	12	3	3.85	0.8212
GO:0034464	BBSome	8	1	2.56	0.8219
GO:0043232	intracellular non-membrane-bounded organ...	612	197	196.13	0.8233
GO:0044430	cytoskeletal part	166	72	53.2	0.8248
GO:0010008	endosome membrane	36	7	11.54	0.8258
GO:0031011	Ino80 complex	9	1	2.88	0.8261
GO:0043231	intracellular membrane-bounded organelle	2292	548	734.54	0.8315
GO:0005829	cytosol	59	16	18.91	0.8324
GO:0098803	respiratory chain complex	17	2	5.45	0.8416
GO:0044455	mitochondrial membrane part	50	7	16.02	0.8429
GO:0005643	nuclear pore	22	4	7.05	0.8451
GO:0000793	condensed chromosome	20	5	6.41	0.8466
GO:0005743	mitochondrial inner membrane	105	20	33.65	0.8643
GO:1902911	protein kinase complex	8	1	2.56	0.8692
GO:1905354	exoribonuclease complex	8	0	2.56	0.8693
GO:0071944	cell periphery	337	122	108	0.8695
GO:0005765	lysosomal membrane	16	4	5.13	0.8764
GO:0000178	exosome (RNase complex)	7	0	2.24	0.8791
GO:1902562	H4 histone acetyltransferase complex	10	3	3.2	0.8818
GO:0005747	mitochondrial respiratory chain complex ...	12	1	3.85	0.8866
GO:0000276	mitochondrial proton-transporting ATP sy...	6	0	1.92	0.89
GO:0032040	small-subunit processome	8	1	2.56	0.8901
GO:0019866	organelle inner membrane	109	20	34.93	0.8941
GO:0005746	mitochondrial respiratory chain	19	2	6.09	0.9077
GO:0005777	peroxisome	41	14	13.14	0.9115
GO:0031902	late endosome membrane	13	2	4.17	0.9151
GO:0098796	membrane protein complex	142	42	45.51	0.919
GO:0035097	histone methyltransferase complex	10	2	3.2	0.9201
GO:1902554	serine/threonine protein kinase complex	7	1	2.24	0.9205
GO:0044454	nuclear chromosome part	43	8	13.78	0.921
GO:0000808	origin recognition complex	6	0	1.92	0.9225
GO:0005839	proteasome core complex	14	0	4.49	0.9244
GO:0000922	spindle pole	8	1	2.56	0.9278
GO:0031314	extrinsic component of mitochondrial inn...	6	1	1.92	0.9307
GO:0008180	COP9 signalosome	8	3	2.56	0.9339
GO:0031248	protein acetyltransferase complex	29	4	9.29	0.9352
GO:0000813	ESCRT I complex	5	0	1.6	0.9356
GO:0005739	mitochondrion	294	70	94.22	0.9377
GO:0120025	plasma membrane bounded cell projection	64	31	20.51	0.9384
GO:0034708	methyltransferase complex	13	2	4.17	0.9415
GO:0005694	chromosome	123	26	39.42	0.9427
GO:0005753	mitochondrial proton-transporting ATP sy...	7	0	2.24	0.9475
GO:0034704	calcium channel complex	7	3	2.24	0.9492
GO:0000145	exocyst	8	2	2.56	0.9494
GO:0098589	membrane region	10	3	3.2	0.9507
GO:0005730	nucleolus	70	16	22.43	0.9544
GO:0030915	Smc5-Smc6 complex	6	1	1.92	0.9587
GO:0016604	nuclear body	13	2	4.17	0.9628
GO:0005794	Golgi apparatus	145	37	46.47	0.9647
GO:0043189	H4/H2A histone acetyltransferase complex	8	3	2.56	0.9654
GO:0044798	nuclear transcription factor complex	26	5	8.33	0.9658
GO:0005852	eukaryotic translation initiation factor...	16	0	5.13	0.9711
GO:0022626	cytosolic ribosome	7	0	2.24	0.974
GO:0032580	Golgi cisterna membrane	7	2	2.24	0.9764
GO:0016282	eukaryotic 43S preinitiation complex	13	0	4.17	0.9764
GO:0033290	eukaryotic 48S preinitiation complex	13	0	4.17	0.9764
GO:0005764	lysosome	32	8	10.26	0.9765
GO:0044439	peroxisomal part	10	3	3.2	0.9771
GO:0070013	intracellular organelle lumen	314	78	100.63	0.9771
GO:0005635	nuclear envelope	33	7	10.58	0.9772
GO:0098687	chromosomal region	14	2	4.49	0.9813
GO:0000123	histone acetyltransferase complex	27	4	8.65	0.9827
GO:0005623	cell	3510	971	1124.89	0.9835
GO:0005791	rough endoplasmic reticulum	10	2	3.2	0.9836
GO:0030430	host cell cytoplasm	5	0	1.6	0.9869
GO:0000407	pre-autophagosomal structure	5	0	1.6	0.9883
GO:0031970	organelle envelope lumen	15	7	4.81	0.9887
GO:0005770	late endosome	20	3	6.41	0.9892
GO:0005769	early endosome	14	2	4.49	0.9892
GO:0098805	whole membrane	110	32	35.25	0.9928
GO:0099023	tethering complex	22	4	7.05	0.9935
GO:0042765	GPI-anchor transamidase complex	6	0	1.92	0.9938
GO:0005681	spliceosomal complex	43	7	13.78	0.9945
GO:1902495	transmembrane transporter complex	31	12	9.93	0.9963
GO:1902555	endoribonuclease complex	7	0	2.24	0.9982
GO:0000439	core TFIIH complex	5	0	1.6	0.9986
GO:0005634	nucleus	1600	352	512.77	0.9989
GO:0031226	intrinsic component of plasma membrane	37	14	11.86	0.9991
GO:0044448	cell cortex part	9	2	2.88	0.9992
GO:0044440	endosomal part	39	7	12.5	0.9994
GO:0043234	protein complex	583	145	186.84	0.9995
GO:0044428	nuclear part	366	68	117.3	0.9999
GO:0031461	cullin-RING ubiquitin ligase complex	16	1	5.13	1
GO:0043233	organelle lumen	314	78	100.63	1
GO:0000323	lytic vacuole	32	8	10.26	1
GO:0032806	carboxy-terminal domain protein kinase c...	5	1	1.6	1
GO:0000313	organellar ribosome	14	5	4.49	1
GO:0035770	ribonucleoprotein granule	11	2	3.53	1
GO:0031312	extrinsic component of organelle membran...	6	1	1.92	1
GO:0042579	microbody	41	14	13.14	1
GO:0097708	intracellular vesicle	99	28	31.73	1
GO:0044463	cell projection part	23	12	7.37	1
GO:0044464	cell part	3458	953	1108.22	1
GO:0055029	nuclear DNA-directed RNA polymerase comp...	44	9	14.1	1
GO:0030964	NADH dehydrogenase complex	12	1	3.85	1
GO:0098636	protein complex involved in cell adhesio...	5	1	1.6	1
GO:0005773	vacuole	42	14	13.46	1
GO:0034705	potassium channel complex	9	3	2.88	1
GO:0098573	intrinsic component of mitochondrial mem...	7	2	2.24	1
GO:0044391	ribosomal subunit	36	11	11.54	1
GO:0031224	intrinsic component of membrane	2280	855	730.7	1
GO:0031227	intrinsic component of endoplasmic retic...	21	6	6.73	1
GO:0099568	cytoplasmic region	11	4	3.53	1
GO:0031300	intrinsic component of organelle membran...	13	4	4.17	1
GO:0031304	intrinsic component of mitochondrial inn...	6	2	1.92	1
GO:0033643	host cell part	91	24	29.16	1
GO:1903293	phosphatase complex	8	1	2.56	1
GO:0033646	host intracellular part	91	24	29.16	1
GO:0044421	extracellular region part	60	28	19.23	1
GO:0033647	host intracellular organelle	86	24	27.56	1
GO:0097526	spliceosomal tri-snRNP complex	8	1	2.56	1
GO:0033648	host intracellular membrane-bounded orga...	86	24	27.56	1
GO:0044425	membrane part	2414	894	773.64	1
GO:0031967	organelle envelope	177	38	56.73	1
GO:0031968	organelle outer membrane	21	5	6.73	1
GO:0000152	nuclear ubiquitin ligase complex	8	0	2.56	1
GO:0044429	mitochondrial part	178	44	57.05	1
GO:1905368	peptidase complex	47	9	15.06	1
GO:1905369	endopeptidase complex	33	6	10.58	1
GO:0048475	coated membrane	25	7	8.01	1
GO:0097060	synaptic membrane	19	12	6.09	1
GO:0098852	lytic vacuole membrane	16	4	5.13	1
GO:0031984	organelle subcompartment	243	81	77.88	1
GO:0030118	clathrin coat	11	3	3.53	1
GO:0031985	Golgi cisterna	7	2	2.24	1
GO:0016469	proton-transporting two-sector ATPase co...	36	18	11.54	1
GO:0033176	proton-transporting V-type ATPase comple...	19	16	6.09	1
GO:0048500	signal recognition particle	6	3	1.92	1
GO:0033177	proton-transporting two-sector ATPase co...	17	6	5.45	1
GO:0031974	membrane-enclosed lumen	314	78	100.63	1
GO:0044432	endoplasmic reticulum part	172	61	55.12	1
GO:0031975	envelope	177	38	56.73	1
GO:0044437	vacuolar part	26	10	8.33	1
GO:0044438	microbody part	10	3	3.2	1
GO:0005622	intracellular	3156	849	1011.44	1
GO:0030532	small nuclear ribonucleoprotein complex	15	2	4.81	1
GO:0033202	DNA helicase complex	9	1	2.88	1
GO:0030134	COPII-coated ER to Golgi transport vesic...	5	2	1.6	1
GO:0099512	supramolecular fiber	90	39	28.84	1
GO:0030135	coated vesicle	22	6	7.05	1
GO:0030137	COPI-coated vesicle	6	3	1.92	1
GO:0043292	contractile fiber	7	2	2.24	1
GO:0070993	translation preinitiation complex	13	0	4.17	1
GO:0012506	vesicle membrane	30	9	9.61	1
GO:0098827	endoplasmic reticulum subcompartment	159	53	50.96	1
GO:0099080	supramolecular complex	90	39	28.84	1
GO:0099081	supramolecular polymer	90	39	28.84	1
GO:0097014	ciliary plasm	9	7	2.88	1
GO:1905348	endonuclease complex	7	0	2.24	1
GO:0090665	glycoprotein complex	7	2	2.24	1
GO:0005575	cellular_component	5654	1812	1812	1
GO:0043656	intracellular region of host	91	24	29.16	1
GO:0043657	host cell	91	24	29.16	1
GO:0000428	DNA-directed RNA polymerase complex	44	9	14.1	1
GO:0031903	microbody membrane	9	3	2.88	1
GO:0098802	plasma membrane receptor complex	5	1	1.6	1
GO:1902493	acetyltransferase complex	29	4	9.29	1
GO:0043227	membrane-bounded organelle	2349	567	752.81	1
GO:0043228	non-membrane-bounded organelle	612	197	196.13	1
GO:0045259	proton-transporting ATP synthase complex	16	1	5.13	1
GO:0043229	intracellular organelle	2733	708	875.87	1
GO:0044215	other organism	91	24	29.16	1
GO:0044216	other organism cell	91	24	29.16	1
GO:0044217	other organism part	91	24	29.16	1
GO:0030662	coated vesicle membrane	19	6	6.09	1
GO:0005798	Golgi-associated vesicle	15	6	4.81	1
GO:0045271	respiratory chain complex I	12	1	3.85	1
GO:0018995	host	91	24	29.16	1
GO:1904949	ATPase complex	33	9	10.58	1
