# Supplementary material for: Eliminating Mosquitoes with Precision Guided Sterile Males
Source: Research Square preprint supplement (doi:10.21203/rs.3.rs-367110/v1), 2021-04-05
Supplement: Supplementary file 5 [file Table S14 - deseq2_liverpool_females_pgSIT_females.annotations.xlsx]

## Sheet: Deseq
Table S16 -deseq2_liverpool_females_pgSIT_females.annotations.xlsx
NCBI_ID	baseMean	log2FoldChange	lfcSE	stat	pvalue	padj	AAEL_ID	gene_description	gene_name	gene_synomym
LOC5566757	4452.25	-2.72799	0.151133	-18.0503	7.85e-73	1.04e-68	AAEL005625	long wavelength sensitive opsin [Source:VB Community Annotation]	GPROP5
LOC5566755	4152.33	-3.18377	0.181806	-17.512	1.16e-68	7.69e-65	AAEL005621	long wavelength sensitive opsin [Source:VB Community Annotation]	GPROP4
CFP	469.542	9.13641	0.681013	13.4159	4.88e-41	2.15e-37
LOC5564117	1523.02	1.70818	0.131796	12.9608	2.04e-38	6.76e-35	AAEL019408	2-Cys thioredoxin peroxidase [Source:UniProtKB/TrEMBL;Acc:Q8WSF6]
GFP	938.847	8.90856	0.690283	12.9057	4.18e-38	1.11e-34
LOC23687965	5753.33	1.68463	0.13435	12.5392	4.56e-36	1.01e-32	AAEL017545
LOC5578117	1083.89	1.828	0.146932	12.4411	1.56e-35	2.96e-32	AAEL003417	mitochondrial ATPase inhibitor, putative [Source:VB Community Annotation]
LOC110675242	380.961	3.5668	0.328832	10.8469	2.06e-27	3.42e-24	AAEL024610
LOC5574840	1051.93	1.57852	0.162424	9.71849	2.51e-22	3.7e-19	AAEL011449
LOC110675243	99.4915	2.7768	0.290214	9.56811	1.09e-21	1.44e-18	AAEL021662
LOC110676075	414.07	3.67542	0.401881	9.14554	5.93e-20	7.14e-17	AAEL025406
LOC5570131	144.448	2.34541	0.26301	8.91758	4.77e-19	5.26e-16	AAEL008112
LOC5571971	3253.19	4.27966	0.481705	8.8844	6.43e-19	6.55e-16	AAEL009451	actin [Source:VB Community Annotation]
LOC110674148	122.323	2.23284	0.255761	8.73018	2.54e-18	2.41e-15	AAEL027610
LOC110680889	222.106	-2.69878	0.310255	-8.69859	3.36e-18	2.78e-15	AAEL024685
LOC5568061	222.106	-2.69878	0.310255	-8.69859	3.36e-18	2.78e-15	AAEL024685
LOC110677170	187.744	3.4417	0.414503	8.30321	1.01e-16	7.89e-14	AAEL021887
LOC5571252	334.71	-1.14624	0.144837	-7.914	2.49e-15	1.83e-12	AAEL001594
tdTomato	443.595	7.49717	0.953816	7.86018	3.84e-15	2.67e-12
LOC5569125	41.0272	-5.34797	0.681946	-7.84221	4.43e-15	2.93e-12	AAEL007389	long wavelength sensitive opsin [Source:VB Community Annotation]	GPROP7
LOC5569310	1066.28	1.1723	0.159419	7.3536	1.93e-13	1.22e-10	AAEL007549	phosphatidylethanolamine-binding protein [Source:VB Community Annotation]
LOC5573701	700.852	1.14889	0.158375	7.25426	4.04e-13	2.43e-10	AAEL010680
LOC5566809	140595	-1.14197	0.160949	-7.09524	1.29e-12	7.44e-10	AAEL005656	myosin heavy chain, nonmuscle or smooth muscle [Source:VB Community Annotation]
LOC5574862	487.323	1.47205	0.208006	7.07697	1.47e-12	8.13e-10	AAEL011468	protein kinase C inhibitor, putative [Source:VB Community Annotation]
LOC5576199	514.983	1.00726	0.143347	7.02671	2.11e-12	1.12e-09	AAEL012387
LOC5563880	1327.4	0.886504	0.127327	6.96241	3.35e-12	1.7e-09	AAEL014198	cdp-diacylglycerol--glycerol-3-phosphate 3-phosphatidyltransferase [Source:VB Community Annotation]
LOC5578136	76.2558	2.06057	0.297604	6.92387	4.39e-12	2.16e-09	AAEL013514	pupal cuticle protein 78E, putative [Source:VB Community Annotation]
LOC5564072	230.518	1.34882	0.195262	6.90773	4.92e-12	2.33e-09	AAEL004067	mitochondrial benzodiazepine receptor, putative [Source:VB Community Annotation]
LOC5576776	728.015	3.00893	0.436056	6.90033	5.19e-12	2.37e-09	AAEL022568
LOC110675612	1023.08	1.90946	0.278926	6.84575	7.61e-12	3.36e-09	AAEL022334
LOC5570920	177.464	1.36147	0.199344	6.82973	8.51e-12	3.63e-09	AAEL001485
LOC5573507	407.002	2.52812	0.373661	6.76582	1.33e-11	5.45e-09	AAEL010552
LOC5575188	999.52	1.06266	0.157146	6.76228	1.36e-11	5.45e-09	AAEL000338	cytochrome P450 [Source:VB Community Annotation]	CYP325E3
LOC110675398	53.606	7.30817	1.12286	6.50856	7.59e-11	2.86e-08	AAEL026396
LOC5566810	486.931	1.82909	0.281032	6.50845	7.59e-11	2.86e-08	AAEL005659
LOC5579989	570.691	1.02923	0.15822	6.50505	7.77e-11	2.86e-08	AAEL001745	candidate tumor suppressor protein [Source:VB Community Annotation]
LOC5573394	802.013	0.964756	0.148907	6.47892	9.24e-11	3.31e-08	AAEL028141
LOC110676546	247.592	1.03869	0.1611	6.44752	1.14e-10	3.96e-08	AAEL020688
LOC5572218	115.83	1.72461	0.274545	6.28172	3.35e-10	1.14e-07	AAEL009625	short-chain dehydrogenase [Source:VB Community Annotation]
LOC5574006	371.014	-1.73105	0.277056	-6.24802	4.16e-10	1.38e-07	AAEL010853	AMP dependent ligase [Source:VB Community Annotation]
LOC110677171	98.2568	2.87972	0.461921	6.23422	4.54e-10	1.47e-07	AAEL024659
LOC5568649	674.355	-1.17942	0.190142	-6.20283	5.55e-10	1.75e-07	AAEL007018	udp-glucose 4-epimerase [Source:VB Community Annotation]
LOC5570735	821.793	0.924144	0.14986	6.16673	6.97e-10	2.15e-07	AAEL008517	elongation factor tu (ef-tu) [Source:VB Community Annotation]
LOC110675360	77.6186	1.65632	0.27019	6.1302	8.78e-10	2.64e-07	AAEL025860
LOC5568614	107.156	2.13161	0.34891	6.10934	1e-09	2.94e-07	AAEL006982	lipase [Source:VB Community Annotation]
LOC5565105	152.088	-2.48956	0.409679	-6.07687	1.23e-09	3.53e-07	AAEL004592	tyrosine-protein kinase src64b [Source:VB Community Annotation]
hSpCas9	18.7492	7.67883	1.26536	6.06847	1.29e-09	3.64e-07
LOC5580166	6044.94	1.00128	0.166326	6.01995	1.74e-09	4.81e-07	AAEL002542	Triosephosphate isomerase [Source:UniProtKB/TrEMBL;Acc:Q17HW3]	Tpi
LOC110676076	80.6153	2.91697	0.487199	5.98723	2.13e-09	5.77e-07	AAEL021283
LOC5569390	366.179	0.9093	0.154004	5.9044	3.54e-09	9.37e-07	AAEL023687
LOC5572031	27.2941	2.96081	0.501886	5.89938	3.65e-09	9.47e-07	AAEL000223	alpha-glucosidase [Source:VB Community Annotation]
LOC5567162	219.089	1.09942	0.188052	5.84635	5.02e-09	1.27e-06	AAEL005914
LOC5578253	201.827	1.10487	0.18903	5.84491	5.07e-09	1.27e-06	AAEL026412
LOC5563586	235.558	1.84421	0.31577	5.84034	5.21e-09	1.28e-06	AAEL000025	phosphoenolpyruvate carboxykinase [Source:VB Community Annotation]
LOC110676442	131.734	1.33506	0.22985	5.80839	6.31e-09	1.52e-06	AAEL022617
LOC5575418	39.1981	-2.55163	0.443092	-5.7587	8.48e-09	2e-06	AAEL026731
LOC5575163	134.857	1.5267	0.265301	5.75457	8.69e-09	2.02e-06	AAEL021602
LOC5575744	402.335	-1.48067	0.257844	-5.74248	9.33e-09	2.13e-06	AAEL012056	oxysterol-binding protein related protein (ORP1) [Source:VB Community Annotation]	ORP1
LOC5575641	163.675	1.13721	0.198866	5.71848	1.07e-08	2.41e-06	AAEL011974
LOC110677668	69.5751	1.49624	0.262499	5.69998	1.2e-08	2.6e-06	AAEL020234
LOC110677670	69.5751	1.49624	0.262499	5.69998	1.2e-08	2.6e-06	AAEL026520
LOC5570205	3144.69	1.19935	0.210622	5.69434	1.24e-08	2.65e-06	AAEL008167	aspartate ammonia lyase [Source:VB Community Annotation]
LOC5564922	287.76	1.17166	0.206365	5.67764	1.37e-08	2.84e-06	AAEL004490	Putative prohibitins and stomatins of the pid superfamily protein [Source:UniProtKB/TrEMBL;Acc:A0A0P6ITV8]
LOC5566558	100.424	1.96434	0.346093	5.67577	1.38e-08	2.84e-06	AAEL005482	C-Type Lectin (CTL). [Source:VB Community Annotation]	CTL18
LOC23687436	471.82	0.929247	0.163767	5.67419	1.39e-08	2.84e-06	AAEL025841
LOC5577244	205.239	0.967641	0.171132	5.65436	1.56e-08	3.11e-06	AAEL003142
LOC5565425	358.741	-0.976647	0.172753	-5.65344	1.57e-08	3.11e-06	AAEL000669
LOC110681177	241.826	-0.975473	0.172701	-5.64832	1.62e-08	3.16e-06	AAEL023031
LOC5570147	227.38	1.05653	0.188264	5.61196	2e-08	3.84e-06	AAEL008128	mitochondrial inner membrane protein translocase, 13kD-subunit, putative [Source:VB Community Annotation]
LOC110678610	155.424	1.05132	0.188324	5.5825	2.37e-08	4.49e-06	AAEL020450
LOC110678626	77.5425	-1.63353	0.294114	-5.55408	2.79e-08	5.21e-06	AAEL026516
LOC5565099	9795.89	-4.58064	0.826714	-5.54078	3.01e-08	5.54e-06	AAEL004590
LOC5566367	37.6775	-3.53797	0.639665	-5.53098	3.18e-08	5.78e-06	AAEL021480
LOC5572911	661.013	1.16881	0.212859	5.49103	4e-08	7.15e-06	AAEL010134	Pupal cuticle protein, putative [Source:UniProtKB/TrEMBL;Acc:A0A1S4G2T5]
LOC5572413	208.955	3.01884	0.553718	5.45194	4.98e-08	8.8e-06	AAEL009803	phaF protein, putative [Source:VB Community Annotation]
LOC5564065	400.001	1.08005	0.198493	5.44124	5.29e-08	9.22e-06	AAEL004081	dj-1 protein (park7) [Source:VB Community Annotation]
LOC5572316	443.52	0.847405	0.155854	5.43715	5.41e-08	9.31e-06	AAEL009708	thioredoxin M, putative [Source:VB Community Annotation]
LOC5564994	285.673	0.852973	0.157311	5.42222	5.89e-08	9.99e-06	AAEL004527	mitochondrial ribosomal protein S7 [Source:VB Community Annotation]	mRpS7
LOC5571701	197.12	0.981721	0.181295	5.41506	6.13e-08	1.02e-05	AAEL009225	mitochondrial ribosome recycling factor [Source:VB Community Annotation]
LOC110674026	55.0349	-1.80283	0.333037	-5.41331	6.19e-08	1.02e-05	AAEL027106
LOC5576871	2884.98	0.922201	0.170763	5.40047	6.65e-08	1.09e-05	AAEL022352
LOC5564724	360.302	0.845909	0.157268	5.37878	7.5e-08	1.21e-05	AAEL004404	HIG1 domain family member 2A, putative [Source:VB Community Annotation]
LOC5573630	8961.01	-9.15787	1.70451	-5.37274	7.76e-08	1.24e-05	AAEL010625
LOC110679116	144.213	0.971237	0.180976	5.36667	8.02e-08	1.26e-05	AAEL020989
LOC5567244	778.173	-1.23492	0.230191	-5.36475	8.11e-08	1.26e-05	AAEL018055
LOC110678174	146.167	-2.27414	0.424546	-5.35665	8.48e-08	1.31e-05	AAEL027171
LOC5576621	156.606	-2.30027	0.431079	-5.33607	9.5e-08	1.45e-05	AAEL012645
LOC5578595	141.87	1.11337	0.209517	5.31399	1.07e-07	1.58e-05	AAEL013782
LOC5565401	143.161	1.39541	0.262708	5.31165	1.09e-07	1.58e-05	AAEL014840	short-chain dehydrogenase [Source:VB Community Annotation]
LOC5564757	174.105	1.74639	0.328788	5.3116	1.09e-07	1.58e-05	AAEL014604	cytochrome P450 [Source:VB Community Annotation]
LOC110680502	193.083	1.73548	0.326763	5.31112	1.09e-07	1.58e-05	AAEL024797
LOC5577526	123.498	1.21819	0.229457	5.30903	1.1e-07	1.58e-05	AAEL013243
LOC110674861	193.237	1.73699	0.327287	5.30724	1.11e-07	1.58e-05	AAEL022681
LOC110680933	50.6717	1.55811	0.293734	5.30449	1.13e-07	1.59e-05	AAEL026931
LOC5574477	186.415	-1.49853	0.282868	-5.29761	1.17e-07	1.64e-05	AAEL002404	receptor protein tyrosine kinase [Source:VB Community Annotation]
LOC5571464	944.102	2.42044	0.458689	5.27686	1.31e-07	1.81e-05	AAEL009091
LOC5572170	2660.27	1.18435	0.225291	5.25698	1.46e-07	2e-05	AAEL009585
LOC5565523	11215.8	-9.56911	1.82723	-5.23696	1.63e-07	2.21e-05	AAEL014873	Osiris, putative [Source:VB Community Annotation]
LOC5574160	117.792	3.09825	0.594054	5.21544	1.83e-07	2.45e-05	AAEL010968	Queuine tRNA-ribosyltransferase subunit QTRTD1 homolog (EC 2.4.2.29)(Queuine tRNA-ribosyltransferase domain-containing protein 1) [Source:VB Community Annotation]
LOC110676304	198.445	1.17151	0.225103	5.20432	1.95e-07	2.58e-05	AAEL013495
LOC110680818	183.159	0.917526	0.177432	5.17115	2.33e-07	3.02e-05	AAEL023687
LOC5564296	733.707	0.799197	0.154551	5.1711	2.33e-07	3.02e-05	AAEL014393	Lactoylglutathione lyase [Source:UniProtKB/TrEMBL;Acc:A0A1S4G1K4]
LOC5578116	168.197	1.06276	0.205598	5.1691	2.35e-07	3.02e-05	AAEL003409	39S ribosomal protein L15, mitochondrial [Source:VB Community Annotation]	mRpL15
LOC110676903	53.2757	1.64293	0.318392	5.16009	2.47e-07	3.14e-05	AAEL020835
LOC5580019	3893.74	0.911295	0.17697	5.14944	2.61e-07	3.27e-05	AAEL009645
LOC5571996	3345.07	1.72312	0.334656	5.14893	2.62e-07	3.27e-05	AAEL009484
LOC5568553	200.686	1.05796	0.20569	5.14348	2.7e-07	3.34e-05	AAEL001109	Glutaredoxin [Source:UniProtKB/TrEMBL;Acc:Q17M81]
LOC5574999	22.9915	2.57342	0.501849	5.12787	2.93e-07	3.57e-05	AAEL002520	apolipoprotein D, putative [Source:VB Community Annotation]
LOC110680819	183.843	0.908302	0.177141	5.12756	2.94e-07	3.57e-05	AAEL025019
LOC110680266	236.164	-1.23769	0.242327	-5.10753	3.26e-07	3.93e-05	AAEL023653
LOC5567186	97.9118	-1.51744	0.297622	-5.09856	3.42e-07	4.08e-05	AAEL000871	Fatty acyl-CoA reductase [Source:UniProtKB/TrEMBL;Acc:Q17MY8]
LOC5564498	19790.7	-9.27579	1.82575	-5.08054	3.76e-07	4.45e-05	AAEL004275	Osiris, putative [Source:UniProtKB/TrEMBL;Acc:A0A1S4F763]
LOC5573260	1776.82	-0.73402	0.145487	-5.04525	4.53e-07	5.31e-05	AAEL010359	ATP-dependent transporter [Source:VB Community Annotation]
LOC5570786	1128.88	0.782139	0.155655	5.02481	5.04e-07	5.85e-05	AAEL008565	Metalloprotease m41 ftsh [Source:UniProtKB/TrEMBL;Acc:A0A1S4FJU4]
LOC5576417	119.209	1.37006	0.273439	5.01048	5.43e-07	6.25e-05	AAEL018241
LOC5577600	701.306	1.94382	0.388332	5.00558	5.57e-07	6.36e-05	AAEL003272	pupal cuticle protein 78E, putative [Source:VB Community Annotation]
LOC5578222	178.23	1.31848	0.264206	4.99035	6.03e-07	6.82e-05	AAEL020104
LOC5572487	110.149	-1.06725	0.213931	-4.98878	6.08e-07	6.82e-05	AAEL009821
LOC5571070	4197.74	1.16644	0.2339	4.98692	6.14e-07	6.83e-05	AAEL008785
LOC5565461	6622.83	-8.83095	1.77211	-4.98329	6.25e-07	6.9e-05	AAEL004788	Osiris, putative [Source:VB Community Annotation]
LOC5567466	1814.7	0.780585	0.156905	4.9749	6.53e-07	7.14e-05	AAEL000958
LOC5577555	221.33	1.14551	0.230752	4.96424	6.9e-07	7.49e-05	AAEL013267
LOC5568078	3827.14	1.02273	0.206472	4.95336	7.29e-07	7.85e-05	AAEL006509
LOC110676010	52.7873	2.09451	0.424957	4.92876	8.28e-07	8.84e-05	AAEL023992
LOC5571045	346.706	0.740482	0.15032	4.92604	8.39e-07	8.89e-05	AAEL008770	proteasome subunit beta type [Source:VB Community Annotation]
LOC5566067	252.55	-1.17971	0.239695	-4.92172	8.58e-07	9.02e-05	AAEL023653
LOC5568977	74.3005	1.20159	0.244565	4.91317	8.96e-07	9.34e-05	AAEL007275	aldo-keto reductase [Source:VB Community Annotation]
LOC5578562	3509.3	0.54266	0.110615	4.90585	9.3e-07	9.62e-05	AAEL019589
LOC5568456	441.481	0.997735	0.203561	4.90141	9.52e-07	9.77e-05	AAEL006867
LOC5570932	514.833	0.850617	0.173648	4.89852	9.66e-07	9.84e-05	AAEL008671	Mitochondrial fission 1 protein [Source:UniProtKB/TrEMBL;Acc:Q16Y49]
LOC5567897	84.6621	-1.23708	0.2527	-4.89547	9.81e-07	9.91e-05	AAEL006350
LOC110678526	7.74135	-6.40531	1.31143	-4.88422	1.04e-06	0.000104176	AAEL024956
LOC5570517	165.119	1.05346	0.216806	4.85901	1.18e-06	0.000117466	AAEL001439	mitochondrial ribosomal protein, L22, putative [Source:VB Community Annotation]	mRpL22
LOC5564301	332.966	0.849138	0.175009	4.85197	1.22e-06	0.000120812	AAEL018336
LOC110679477	224.012	-2.30032	0.475296	-4.83976	1.3e-06	0.000127523	AAEL023997
LOC5570312	204.214	0.909702	0.188056	4.83739	1.32e-06	0.0001281	AAEL008249
LOC5572419	166.639	3.03989	0.62907	4.83235	1.35e-06	0.00013043	AAEL009802	cuticle protein, putative [Source:VB Community Annotation]
LOC5570130	70.8616	1.76909	0.366292	4.82973	1.37e-06	0.0001312	AAEL008116
LOC5572173	223.682	0.769366	0.159518	4.82307	1.41e-06	0.000134683	AAEL009590	outer mitochondrial translocase subunit, putative [Source:VB Community Annotation]
LOC5567879	404.856	-1.62331	0.336717	-4.821	1.43e-06	0.000135118	AAEL006348	deoxyribonuclease I, putative [Source:VB Community Annotation]
LOC5570593	1904.02	-0.962636	0.200013	-4.81286	1.49e-06	0.000139742	AAEL008398
LOC5566110	683.125	0.932515	0.194233	4.80101	1.58e-06	0.000147104	AAEL005179
LOC5573924	730.762	-4.63881	0.966465	-4.79977	1.59e-06	0.000147104	AAEL002231	cuticle protein, putative [Source:VB Community Annotation]
LOC110678870	23.5189	2.32994	0.485981	4.7943	1.63e-06	0.000150129	AAEL025813
LOC5578564	244.447	0.941901	0.196756	4.78715	1.69e-06	0.000154502	AAEL013749
LOC5571079	197.904	0.936686	0.196007	4.77884	1.76e-06	0.000159924	AAEL008800	mitochondrial ribosomal protein, S26, putative [Source:VB Community Annotation]	mRpS26
LOC5564547	237.625	0.78958	0.1656	4.76799	1.86e-06	0.000167629	AAEL004306	39S ribosomal protein L19, mitochondrial precursor [Source:UniProtKB/TrEMBL;Acc:Q17D59]	mRpL19
LOC5571276	471.695	0.74503	0.156336	4.76558	1.88e-06	0.000168504	AAEL001561
LOC5564511	3278.59	-9.13341	1.91824	-4.76135	1.92e-06	0.000170919	AAEL004298	Osiris, putative [Source:VB Community Annotation]
LOC110677906	19.1646	-4.48729	0.944281	-4.75207	2.01e-06	0.000177759	AAEL021107
LOC110675728	151.348	-1.76526	0.3718	-4.74787	2.06e-06	0.000180285	AAEL027079
LOC5571346	1223.63	2.51564	0.530567	4.74141	2.12e-06	0.00018491	AAEL009011
LOC5571336	11.7917	4.11164	0.868654	4.73334	2.21e-06	0.000191159	AAEL008975
LOC5575638	323.244	1.02925	0.217705	4.7277	2.27e-06	0.000195269	AAEL011965	nuclear lamin L1 alpha, putative [Source:VB Community Annotation]
LOC5565358	2197.32	2.07455	0.43949	4.72036	2.35e-06	0.000201149	AAEL004746	structural contituent of cuticle [Source:VB Community Annotation]
LOC5572494	1359.04	1.63078	0.34567	4.71775	2.38e-06	0.000202441	AAEL024717
LOC110678608	171.194	0.826428	0.175226	4.71636	2.4e-06	0.00020253	AAEL020116
LOC5578161	101.116	1.2927	0.274179	4.7148	2.42e-06	0.000202792	AAEL013542	elongase, putative [Source:VB Community Annotation]
LOC5568631	122.558	-1.13007	0.240025	-4.70811	2.5e-06	0.000208244	AAEL006991
LOC5574182	63.977	1.24334	0.265801	4.67772	2.9e-06	0.00023964	AAEL002284	mediator of RNA polymerase II transcription subunit 18 (Med18) [Source:VB Community Annotation]	Med18
LOC5572367	379.301	-1.07379	0.229598	-4.67683	2.91e-06	0.00023964	AAEL009756
LOC110680257	15.1552	2.60489	0.558706	4.66237	3.13e-06	0.000254996	AAEL027743
LOC5574726	257.29	-0.744675	0.159749	-4.66154	3.14e-06	0.000254996	AAEL011366
LOC5572122	928.955	0.601392	0.129218	4.6541	3.25e-06	0.000262761	AAEL009534	dimethyladenosine transferase [Source:VB Community Annotation]
LOC5566370	374.386	0.703609	0.151255	4.65179	3.29e-06	0.000264105	AAEL005354	dynein light chain, putative [Source:VB Community Annotation]
LOC5572121	928.792	0.600972	0.129241	4.65002	3.32e-06	0.000264783	AAEL009526
LOC5564791	136.057	0.88404	0.190725	4.63515	3.57e-06	0.000282838	AAEL004433	mitochondrial ribosomal protein, L14, putative [Source:VB Community Annotation]	mRpL14
LOC5572751	1186.68	0.646717	0.139623	4.63188	3.62e-06	0.000285643	AAEL010027	CRAL/TRIO domain-containing protein [Source:VB Community Annotation]
LOC110676402	39.8066	-5.897	1.27492	-4.62539	3.74e-06	0.000292983	AAEL021914
LOC5566055	170.747	0.837383	0.181576	4.61175	3.99e-06	0.000311055	AAEL005150	mitochondrial ribosomal protein, L23, putative [Source:VB Community Annotation]	mRpL23
LOC5571735	3175.05	1.17403	0.254871	4.60636	4.1e-06	0.000317354	AAEL009257
LOC5567211	150.422	0.972156	0.21164	4.59345	4.36e-06	0.00033567	AAEL020101
LOC5564084	1083.71	1.10887	0.241842	4.58509	4.54e-06	0.000347374	AAEL014302
LOC110674609	15.4804	2.52097	0.550656	4.57813	4.69e-06	0.00035707	AAEL021980
LOC5571046	146.622	1.09602	0.239518	4.57596	4.74e-06	0.000358731	AAEL008783
LOC5569539	730.015	0.702309	0.153817	4.56587	4.97e-06	0.000372928	AAEL007713	viral IAP-associated factor, putative [Source:VB Community Annotation]
LOC5564047	579.48	0.875354	0.191735	4.56544	4.98e-06	0.000372928	AAEL004071	nitrogen fixation protein nifu [Source:VB Community Annotation]
LOC110679177	381.046	0.745518	0.163452	4.56108	5.09e-06	0.000376978	AAEL025122
LOC110676635	3315.42	2.85841	0.626732	4.56082	5.1e-06	0.000376978	AAEL024588
LOC5567100	511.956	0.596778	0.131197	4.54871	5.4e-06	0.000397109	AAEL005830	26S proteasome alpha 4 subunit [Source:VB Community Annotation]	Prosalpha4
LOC5573193	83.4718	1.12422	0.247269	4.54656	5.45e-06	0.00039898	AAEL002019
LOC5578256	102.18	1.01013	0.222257	4.54488	5.5e-06	0.000399955	AAEL014883	dynactin, p27-subunit, putative [Source:VB Community Annotation]
LOC5578729	853.137	0.610782	0.134596	4.53788	5.68e-06	0.00041121	AAEL013844	diazepam binding inhibitor, putative [Source:VB Community Annotation]
LOC110675358	142.463	2.75621	0.607724	4.5353	5.75e-06	0.000414009	AAEL025157
LOC5566429	43.156	1.61159	0.355458	4.53383	5.79e-06	0.000414162	AAEL019600
LOC5568365	8287.85	0.749581	0.165363	4.53294	5.82e-06	0.000414162	AAEL001091	Malic enzyme [Source:UniProtKB/TrEMBL;Acc:A0A1S4EXR8]
LOC5565955	1291.27	0.558012	0.123154	4.531	5.87e-06	0.000415644	AAEL005052	Tubulin beta chain [Source:UniProtKB/TrEMBL;Acc:Q17B46]
LOC5570883	296.498	1.19023	0.26275	4.52992	5.9e-06	0.000415644	AAEL008658	leucine-rich immune protein (TM) [Source:VB Community Annotation]	LRIM16
LOC5576103	863.482	1.01564	0.224336	4.52734	5.97e-06	0.000418534	AAEL002797
LOC110681390	142.227	-0.993862	0.220047	-4.51659	6.28e-06	0.000438026	AAEL024591
LOC110678505	38.7425	-5.85756	1.2987	-4.51032	6.47e-06	0.0004488	AAEL021766
LOC110674643	1472.19	-4.87718	1.08311	-4.50292	6.7e-06	0.000462302	AAEL022009
LOC5565210	1766.31	0.531001	0.118088	4.49665	6.9e-06	0.000473676	AAEL004680	nuclear lamin L1 alpha, putative [Source:VB Community Annotation]
LOC110681088	492.691	-0.81673	0.182173	-4.48326	7.35e-06	0.000501821	AAEL021891
LOC5578666	166.342	1.51284	0.337682	4.48009	7.46e-06	0.000506709	AAEL003640	sodium/chloride dependent amino acid transporter [Source:VB Community Annotation]
LOC5569568	275.738	0.752409	0.168314	4.47028	7.81e-06	0.000527821	AAEL007762	mitochondrial ribosomal protein, L40, putative [Source:VB Community Annotation]	mRpL40
LOC110675879	1172.79	1.92676	0.431195	4.46842	7.88e-06	0.000529724	AAEL026679
LOC110675616	100.278	-0.995063	0.223043	-4.46131	8.15e-06	0.000544834	AAEL023898
LOC110678856	526.544	-2.4454	0.548436	-4.45885	8.24e-06	0.000546726	AAEL027968
LOC5567088	182.276	1.22148	0.27399	4.45811	8.27e-06	0.000546726	AAEL025983
LOC5575537	178.601	1.83197	0.411	4.45734	8.3e-06	0.000546726	AAEL002676	angiotensin-converting enzyme [Source:VB Community Annotation]
LOC23687526	138.47	-1.06304	0.238551	-4.45622	8.34e-06	0.000546888	AAEL021570
LOC5568954	1328.79	-1.78709	0.401144	-4.45497	8.39e-06	0.000547361	AAEL007258
LOC5578680	389.578	0.941831	0.211626	4.45046	8.57e-06	0.000556261	AAEL003622	delta(9)-desaturase, putative [Source:VB Community Annotation]
LOC5566413	1950.99	-8.51628	1.91656	-4.44351	8.85e-06	0.000571717	AAEL015156
LOC5569917	110.068	-1.1608	0.26146	-4.43967	9.01e-06	0.00057689	AAEL008018	cytochrome P450 [Source:VB Community Annotation]	CYP4C51
LOC110678704	16.2914	2.29285	0.516467	4.43949	9.02e-06	0.00057689	AAEL023039
LOC5577385	169.312	0.814195	0.183448	4.43829	9.07e-06	0.000577313	AAEL000467	mitochondrial ribosomal protein, L49, putative [Source:VB Community Annotation]	mRpL49
LOC5574100	737.316	0.78604	0.177475	4.42903	9.47e-06	0.000598454	AAEL002271	26S proteasome regulatory subunit S3 [Source:UniProtKB/TrEMBL;Acc:Q17IR8]
LOC5565000	89.4541	1.30744	0.295235	4.42848	9.49e-06	0.000598454	AAEL004529	glyoxylate/hydroxypyruvate reductase [Source:VB Community Annotation]
LOC110674003	280.61	0.689707	0.155781	4.42742	9.54e-06	0.000598549	AAEL007884	conserved membrane protein at 44E, putative [Source:VB Community Annotation]
LOC5567423	4821.96	1.10908	0.25064	4.42498	9.64e-06	0.000602492	AAEL006070	Phosphoglycerate mutase [Source:UniProtKB/TrEMBL;Acc:Q177P3]
LOC5564575	564.951	0.965409	0.218277	4.42286	9.74e-06	0.00060559	AAEL004341	Carboxy/choline esterase Alpha Esterase [Source:VB Community Annotation]	CCEAE1O
LOC110677067	21.3949	1.93265	0.437178	4.42074	9.84e-06	0.000608716	AAEL024249
LOC5563928	238.309	1.10434	0.250121	4.41521	1.01e-05	0.000621577	AAEL023586
LOC110676231	24110.6	0.837893	0.190448	4.39959	1.08e-05	0.000664929	AAEL027975
LOC5570152	628.303	0.905115	0.20632	4.38695	1.15e-05	0.00070152	AAEL008125	Fatty acyl-CoA reductase [Source:UniProtKB/TrEMBL;Acc:Q16ZP3]
LOC5570575	417.167	0.669276	0.152682	4.38347	1.17e-05	0.000707268	AAEL008394
LOC5565856	199.021	0.81393	0.185694	4.38318	1.17e-05	0.000707268	AAEL005040	E3 ubiquitin-protein ligase [Source:UniProtKB/TrEMBL;Acc:Q17BB8]
LOC5569091	221.562	0.812468	0.185552	4.37866	1.19e-05	0.000718816	AAEL007355	mitochondrial ribosomal protein, S18A, putative [Source:VB Community Annotation]	mRpS18A
LOC5565578	44.4061	2.54297	0.581013	4.37679	1.2e-05	0.000721611	AAEL014893	cytochrome P450 [Source:VB Community Annotation]	CYP6BB2
LOC5580278	1547.13	0.931313	0.212831	4.37584	1.21e-05	0.000721611	AAEL003011	NADH dehydrogenase, putative [Source:VB Community Annotation]
LOC5574194	104.807	-1.01745	0.232905	-4.36854	1.25e-05	0.000742779	AAEL002311	ADP-ribosylation factor, putative [Source:VB Community Annotation]
LOC110675724	117.924	-1.4558	0.333393	-4.36663	1.26e-05	0.00074598	AAEL024834
LOC5571492	185.408	0.840566	0.19324	4.34985	1.36e-05	0.000801841	AAEL001615	mitochondrial ribosomal protein, S18C, putative [Source:VB Community Annotation]	mRpS18C
LOC110677976	15.2933	-3.86276	0.889019	-4.34497	1.39e-05	0.000816229	AAEL020275
LOC5565925	599.298	1.99256	0.459264	4.33861	1.43e-05	0.000835653	AAEL005060	Clip-Domain Serine Protease family B. [Source:VB Community Annotation]	CLIPB44
LOC5567085	723.051	1.60739	0.370548	4.33787	1.44e-05	0.000835653	AAEL026928
LOC110678970	15205.9	1.71372	0.395922	4.32842	1.5e-05	0.000868513	AAEL026093
LOC5580270	135.452	-0.849869	0.196469	-4.32571	1.52e-05	0.00087529	AAEL003003	glutamate-gated chloride channel [Source:VB Community Annotation]
LOC5577095	1661.86	0.612266	0.141571	4.32479	1.53e-05	0.00087529	AAEL012994	Glucose-6-phosphate isomerase [Source:UniProtKB/TrEMBL;Acc:Q16KI0]
LOC110681201	223.975	-0.869293	0.201125	-4.32214	1.55e-05	0.000878351	AAEL020314
LOC5569400	155.701	1.2861	0.297562	4.32212	1.55e-05	0.000878351	AAEL007604	odorant-binding protein 56a, putative [Source:VB Community Annotation]
LOC5575813	790.215	0.659857	0.152735	4.32028	1.56e-05	0.000881893	AAEL012069	glutathione peroxidase [Source:VB Community Annotation]	GPXH1
LOC110681176	103.077	-1.00184	0.231987	-4.3185	1.57e-05	0.000885255	AAEL027395
LOC5568577	54.9946	1.48656	0.344399	4.31639	1.59e-05	0.000888097	AAEL022849
LOC5565085	1244.09	0.557221	0.129108	4.31592	1.59e-05	0.000888097	AAEL023069	26S protease regulatory subunit [Source:UniProtKB/TrEMBL;Acc:Q16FL0]
LOC5573583	1388.82	1.25047	0.289896	4.31351	1.61e-05	0.000893133	AAEL002130	ecdysone inducible protein L2, putative [Source:VB Community Annotation]
LOC5579861	1078.76	1.08163	0.250795	4.31282	1.61e-05	0.000893133	AAEL005979	Class B Scavenger Receptor (CD36 domain). [Source:VB Community Annotation]	SCRB3
LOC5575334	427.054	1.37526	0.319128	4.30943	1.64e-05	0.000903152	AAEL002593	serine protease [Source:VB Community Annotation]
LOC110676401	27.6961	-7.27181	1.68847	-4.30675	1.66e-05	0.000910365	AAEL025615
LOC110678708	6.26095	-6.09989	1.41705	-4.30463	1.67e-05	0.00091531	AAEL024801
LOC5576538	698.841	-0.653224	0.151853	-4.3017	1.69e-05	0.000923711	AAEL020236
LOC5566081	213.609	0.820688	0.190844	4.30031	1.71e-05	0.000925719	AAEL005162	39S ribosomal protein L11, mitochondrial [Source:UniProtKB/TrEMBL;Acc:Q17AX3]	mRpL11
LOC5574526	28689.3	-0.706539	0.164444	-4.29652	1.73e-05	0.000937816	AAEL011197	actin [Source:VB Community Annotation]
LOC5576398	177.72	-0.799192	0.186867	-4.27679	1.9e-05	0.00102071	AAEL012486
LOC5565798	49.9149	-1.52938	0.358469	-4.26641	1.99e-05	0.00106282	AAEL004999
LOC5574899	139997	1.45714	0.341573	4.26597	1.99e-05	0.00106282	AAEL011504	pupal cuticle protein, putative [Source:VB Community Annotation]
LOC5569663	519.31	-1.27693	0.300213	-4.2534	2.11e-05	0.0011198	AAEL007807	cytochrome P450 [Source:VB Community Annotation]	CYP4D38
LOC5569275	215.928	1.3608	0.320133	4.25072	2.13e-05	0.00112551	AAEL007531
LOC5564387	386.364	1.76072	0.414241	4.25047	2.13e-05	0.00112551	AAEL014416	pupal cuticle protein 78E, putative [Source:VB Community Annotation]
LOC5566540	65.2406	-1.15043	0.270763	-4.24885	2.15e-05	0.00112919	AAEL005465
LOC5579168	644.019	0.551927	0.130012	4.2452	2.18e-05	0.00114317	AAEL003871	26S proteasome alpha 7 subunit [Source:VB Community Annotation]	Prosalpha7
LOC5566687	3631.95	0.633076	0.149177	4.24379	2.2e-05	0.00114586	AAEL005558
LOC5579109	1852.79	-0.494634	0.116626	-4.24121	2.22e-05	0.00115456	AAEL003829	dynamin [Source:VB Community Annotation]
LOC5573476	18.0517	3.98813	0.942317	4.23226	2.31e-05	0.0011968	AAEL010531
LOC5573756	174.962	0.902102	0.213309	4.22908	2.35e-05	0.00120914	AAEL000297	mitochondrial ribosomal protein S25 [Source:VB Community Annotation]	mRpS25
LOC5578580	10321.9	0.747802	0.176904	4.22717	2.37e-05	0.0012147	AAEL013766
LOC5567341	591.259	1.12705	0.266718	4.22561	2.38e-05	0.00121708	AAEL006011
LOC5569111	96.2288	1.03585	0.245173	4.22499	2.39e-05	0.00121708	AAEL007368
LOC5571993	116.194	-1.36284	0.322698	-4.22327	2.41e-05	0.00122003	AAEL009479	amino acid transporter [Source:VB Community Annotation]
LOC5578731	583.281	0.727021	0.172169	4.22272	2.41e-05	0.00122003	AAEL013841	paraplegin [Source:VB Community Annotation]
LOC5572512	261.876	0.829761	0.196587	4.22084	2.43e-05	0.00122558	AAEL009842	Galectin [Source:UniProtKB/TrEMBL;Acc:Q16UP1]	GALE12
LOC5567429	267.421	-3.18455	0.75467	-4.21979	2.45e-05	0.00122662	AAEL006109	odorant binding protein OBP23 [Source:VB Community Annotation]	OBP23
LOC5575879	3339.44	0.669839	0.15881	4.21786	2.47e-05	0.00123252	AAEL026432
LOC5565356	485.021	1.96572	0.466498	4.21378	2.51e-05	0.00125027	AAEL004776	pupal cuticle protein, putative [Source:VB Community Annotation]
LOC5570871	217.655	0.876289	0.208044	4.21203	2.53e-05	0.00125361	AAEL019868
LOC110680619	234.764	0.663732	0.157632	4.21065	2.55e-05	0.00125361	AAEL021316
LOC5564671	234.764	0.663732	0.157632	4.21065	2.55e-05	0.00125361	AAEL021316
LOC5569338	2589.71	-0.520309	0.123601	-4.20958	2.56e-05	0.00125486	AAEL007546	actin-related protein 2/3 complex subunit 1A [Source:VB Community Annotation]
LOC110676558	231.03	-5.21942	1.2407	-4.20684	2.59e-05	0.00126551	AAEL023929
LOC5573004	106.09	1.00971	0.240106	4.20525	2.61e-05	0.00126972	AAEL001943	mitochondrial ribosomal protein, S34, putative [Source:VB Community Annotation]	mRpS34
LOC5573121	145.189	0.821717	0.195441	4.20442	2.62e-05	0.00126972	AAEL001974
LOC5576842	236.943	0.987315	0.23491	4.20294	2.63e-05	0.00127338	AAEL012820
LOC110676774	461.991	1.64283	0.390983	4.20179	2.65e-05	0.00127522	AAEL027182
LOC5564510	618.059	-0.912308	0.217654	-4.19154	2.77e-05	0.0013294	AAEL004278
LOC23687512	9.74284	-5.75915	1.3751	-4.18816	2.81e-05	0.00134449	AAEL022605
LOC5578538	1904.7	0.79367	0.189581	4.18644	2.83e-05	0.00134985	AAEL013744	NADH:ubiquinone dehydrogenase, putative [Source:VB Community Annotation]
LOC5572415	187.232	2.49868	0.597104	4.18466	2.86e-05	0.00135557	AAEL009783	cuticle protein, putative [Source:VB Community Annotation]
LOC5579001	94.3413	1.6938	0.405238	4.17976	2.92e-05	0.00138022	AAEL003803
LOC5565790	7020.24	0.95844	0.229434	4.17742	2.95e-05	0.0013895	AAEL014978	adult cuticle protein, putative [Source:VB Community Annotation]
LOC5574181	1279.73	0.666194	0.159582	4.17463	2.98e-05	0.00140165	AAEL002299	high affinity copper transporter, putative [Source:VB Community Annotation]
LOC5578833	1899.38	1.01642	0.243551	4.17335	3e-05	0.00140457	AAEL013876	mitochondrial NADH:ubiquinone oxidoreductase B14.7 subunit, putative [Source:VB Community Annotation]
LOC110678298	42.0645	-3.88836	0.934464	-4.16106	3.17e-05	0.00147713	AAEL026698
LOC5576673	76.8952	2.31802	0.558398	4.15119	3.31e-05	0.00153173	AAEL026023
LOC5578082	1712.93	0.899938	0.216792	4.15116	3.31e-05	0.00153173	AAEL003423	NADH dehydrogenase, putative [Source:VB Community Annotation]
LOC5574137	554.241	1.5199	0.366359	4.14865	3.34e-05	0.00154041	AAEL010944
LOC110676460	62.0142	1.13271	0.273056	4.14827	3.35e-05	0.00154041	AAEL024820
LOC5578221	134.43	1.28136	0.308968	4.14721	3.37e-05	0.00154219	AAEL024259
LOC5571952	204.81	1.59144	0.384145	4.1428	3.43e-05	0.00156673	AAEL009438	regulator of telomere elongation helicase 1 rtel1 [Source:VB Community Annotation]
LOC110674163	412.339	0.663138	0.160256	4.13799	3.5e-05	0.00159446	AAEL022901	Huntingtin-interacting protein HYPK (Fragment) [Source:UniProtKB/TrEMBL;Acc:Q1HRA7]
LOC110674048	9.0752	-5.6601	1.37073	-4.12925	3.64e-05	0.00165057	AAEL023189
LOC5567896	103.256	-1.66654	0.403895	-4.12616	3.69e-05	0.00166168	AAEL006354	epoxide hydrolase [Source:VB Community Annotation]
LOC110676775	444.414	1.52307	0.369126	4.12614	3.69e-05	0.00166168	AAEL023579
LOC110674776	235.374	1.61837	0.392636	4.1218	3.76e-05	0.00168755	AAEL026955
LOC5571366	50.2703	2.88653	0.70175	4.11333	3.9e-05	0.00174481	AAEL008965	adult cuticle protein, putative [Source:VB Community Annotation]
LOC5574556	540.582	0.841228	0.204703	4.1095	3.97e-05	0.00176384	AAEL011231
LOC5565898	285.886	-0.750997	0.182757	-4.10927	3.97e-05	0.00176384	AAEL000715	Zinc finger protein [Source:UniProtKB/TrEMBL;Acc:A0A1S4EWM9]
LOC5572805	113.202	0.881335	0.21464	4.10612	4.02e-05	0.00178213	AAEL001900	lactosylceramide 4-alpha-galactosyltransferase (alpha- 1,4-galactosyltransferase) [Source:VB Community Annotation]
LOC5564751	12.3439	2.72498	0.664709	4.09951	4.14e-05	0.00182764	AAEL014617	cytochrome P450 [Source:VB Community Annotation]	CYP9J28
LOC5564242	112.128	-3.17876	0.776191	-4.09533	4.22e-05	0.00185475	AAEL004188
LOC5568352	47.5727	-3.48265	0.851308	-4.09095	4.3e-05	0.00188392	AAEL001074	cadherin [Source:VB Community Annotation]
LOC5574268	3848.15	1.69915	0.415519	4.08922	4.33e-05	0.00189173	AAEL022845
LOC23687562	1253.67	0.967347	0.236712	4.0866	4.38e-05	0.00190695	AAEL017142
LOC5571162	255.333	0.798381	0.195674	4.08015	4.5e-05	0.00195419	AAEL008874
LOC5573894	1460.86	0.445018	0.109113	4.0785	4.53e-05	0.00196167	AAEL002184	F-actin capping protein beta subunit [Source:VB Community Annotation]
LOC5564551	155.86	-3.25771	0.799035	-4.07705	4.56e-05	0.00196748	AAEL004326
LOC110674133	162.522	2.86246	0.70234	4.0756	4.59e-05	0.00197336	AAEL020011
LOC5564916	414.636	0.820317	0.201364	4.07381	4.63e-05	0.00198047	AAEL014657
LOC110674453	348.073	1.28647	0.315876	4.07269	4.65e-05	0.00198047
LOC5575705	383.221	1.94138	0.476705	4.07251	4.65e-05	0.00198047	AAEL012013
LOC5576879	328.704	0.860356	0.211562	4.06668	4.77e-05	0.0020241	AAEL003019
LOC5564347	373.09	-0.649602	0.159845	-4.06394	4.83e-05	0.0020415	AAEL004200	DNA replication licensing factor MCM8 [Source:VB Community Annotation]
LOC5568110	3029.36	0.430367	0.106015	4.05949	4.92e-05	0.00207419	AAEL006564	mitochondrial RNA splicing protein [Source:VB Community Annotation]
LOC5573893	35.9088	1.70398	0.419975	4.05733	4.96e-05	0.00208683	AAEL002217
LOC110678582	17.2755	-7.5604	1.86604	-4.05158	5.09e-05	0.00213197	AAEL025764
LOC5577501	59.8412	-1.09321	0.270386	-4.04314	5.27e-05	0.00220332	AAEL022637
LOC5565814	238.327	1.85803	0.459693	4.04188	5.3e-05	0.00220817	AAEL025577
LOC110677276	99.3846	1.04652	0.259049	4.03986	5.35e-05	0.00222028	AAEL024645
LOC5572534	3075.02	-0.637813	0.158245	-4.03054	5.56e-05	0.00230299	AAEL009859	nucleolar GTP-binding protein [Source:VB Community Annotation]
LOC5564577	41.9137	1.78253	0.442551	4.02785	5.63e-05	0.0023222	AAEL004335	secreted ferritin G subunit precursor, putative [Source:VB Community Annotation]
LOC110674510	12.565	3.34489	0.830671	4.02673	5.66e-05	0.00232608	AAEL020797
LOC5572559	3188.72	-0.799848	0.198754	-4.02431	5.71e-05	0.00234289	AAEL009895	neprilysin [Source:VB Community Annotation]
LOC5569002	35851.7	0.57718	0.143576	4.02003	5.82e-05	0.00237849	AAEL007281	stretchin-mlck [Source:VB Community Annotation]
LOC5570740	4333.68	0.522583	0.130071	4.01766	5.88e-05	0.00238992	AAEL025518
LOC5577372	768.118	0.551726	0.137333	4.01745	5.88e-05	0.00238992	AAEL000419
LOC5575624	140.307	-1.08673	0.270695	-4.01461	5.95e-05	0.00241147	AAEL019646
LOC5575681	1614.25	0.899831	0.22443	4.00941	6.09e-05	0.0024577	AAEL011992	NADH:ubiquinone dehydrogenase, putative [Source:VB Community Annotation]
LOC5579024	154.751	0.905001	0.22592	4.00584	6.18e-05	0.00248751	AAEL013964	60S ribosomal protein L20, putative [Source:UniProtKB/TrEMBL;Acc:Q16HN7]	RpL20
LOC5568093	84.5326	0.948297	0.236842	4.00392	6.23e-05	0.00250017	AAEL006507
LOC5578296	320.126	-0.865412	0.216282	-4.00131	6.3e-05	0.00252031	AAEL019622
LOC5565659	655.297	2.35475	0.58879	3.9993	6.35e-05	0.00253411	AAEL004903
LOC5565391	407.699	2.5264	0.632121	3.9967	6.42e-05	0.00254297	AAEL004748	pupal cuticle protein, putative [Source:VB Community Annotation]
LOC5577947	13492.9	0.606765	0.151822	3.99656	6.43e-05	0.00254297	AAEL013431	proline oxidase [Source:VB Community Annotation]
LOC5571557	829.94	0.632208	0.158196	3.99634	6.43e-05	0.00254297	AAEL009142	prolyl endopeptidase (prolyl oligopeptidase) [Source:VB Community Annotation]
LOC5579971	198.268	-1.13679	0.285388	-3.98333	6.8e-05	0.00267841	AAEL026089
LOC5573452	506.411	0.515602	0.129477	3.98217	6.83e-05	0.00268349	AAEL010496
LOC5572867	538.241	0.531127	0.133449	3.98001	6.89e-05	0.00270006	AAEL010087	26S proteasome alpha 3 subunit [Source:VB Community Annotation]	Prosalpha3
LOC5567981	238.054	-0.694885	0.174673	-3.9782	6.94e-05	0.00271265	AAEL006419	recombining binding protein suppressor of hairless [Source:VB Community Annotation]
LOC5578361	515.238	-0.770352	0.193919	-3.97253	7.11e-05	0.00276982	AAEL003550	aquaporin [Source:VB Community Annotation]
LOC5564181	893.176	-0.546171	0.137603	-3.96919	7.21e-05	0.00280079	AAEL004131	gh regulated tbc protein-1 [Source:VB Community Annotation]
LOC5575271	230.851	-0.664067	0.167468	-3.96533	7.33e-05	0.00283816	AAEL011736	cyclohex-1-ene-1-carboxyl-CoA hydratase, putative [Source:VB Community Annotation]
LOC5565869	427.837	0.614904	0.155141	3.96352	7.39e-05	0.00285145	AAEL015007	Proteasome subunit alpha type [Source:UniProtKB/TrEMBL;Acc:Q16EV7]
LOC5570155	37.195	-1.23994	0.312922	-3.96245	7.42e-05	0.00285586	AAEL008126	GPCR Latrophilin Family [Source:VB Community Annotation]	GPRCIR
LOC5563731	42.5839	-1.18092	0.298154	-3.96077	7.47e-05	0.00286771	AAEL014084	kinesin eg-5 [Source:VB Community Annotation]
LOC5571343	59.8545	3.51423	0.887549	3.95948	7.51e-05	0.00287493	AAEL008977
LOC5572966	124.209	0.78694	0.198932	3.95582	7.63e-05	0.00291093	AAEL010181	mitochondrial ribosomal protein, L51, putative [Source:VB Community Annotation]	mRpL51
LOC110678949	13529.8	-0.658843	0.166595	-3.95476	7.66e-05	0.00291543	AAEL022104	Ribosomal protein L3 [Source:UniProtKB/TrEMBL;Acc:Q1HR77]
LOC5572171	393.29	1.15063	0.291014	3.95387	7.69e-05	0.00291787	AAEL009580
LOC110676586	4851.59	2.65978	0.673241	3.95072	7.79e-05	0.00294818	AAEL021195
LOC5575321	735.09	0.62161	0.157463	3.94766	7.89e-05	0.00297755	AAEL002597
LOC5573415	76.7852	-0.930614	0.236017	-3.943	8.05e-05	0.00302745	AAEL019733
LOC5565397	148.935	1.77142	0.449817	3.93809	8.21e-05	0.00308132	AAEL019993
LOC110674725	58.8682	1.39436	0.354712	3.93097	8.46e-05	0.0031539	AAEL028222
LOC5570355	510.442	-1.25838	0.320126	-3.93088	8.46e-05	0.0031539	AAEL001368	kek1 [Source:VB Community Annotation]
LOC5569987	388.888	-0.604687	0.153846	-3.93046	8.48e-05	0.0031539	AAEL008068
LOC5570215	48.2402	-1.1973	0.304801	-3.92815	8.56e-05	0.00317543	AAEL008156
LOC5564396	116.316	-0.962547	0.245139	-3.92654	8.62e-05	0.00318781	AAEL004244
LOC5580163	68.755	1.34062	0.341869	3.92143	8.8e-05	0.00324716	AAEL002541	cystinosin [Source:VB Community Annotation]
LOC5574411	62.038	-1.96044	0.500508	-3.9169	8.97e-05	0.00329948	AAEL011118	Dual specificity protein kinase [Source:UniProtKB/TrEMBL;Acc:A0A1S4FSD2]
LOC5566839	12.7321	3.64965	0.933755	3.90857	9.28e-05	0.00340593	AAEL015280
LOC5564019	749.292	1.04735	0.268027	3.90764	9.32e-05	0.00340606	AAEL019487
LOC5564386	9198.25	0.816052	0.208857	3.90722	9.34e-05	0.00340606	AAEL014419
LOC5568474	104.578	1.01542	0.260197	3.90252	9.52e-05	0.00346348	AAEL006890
LOC5572754	43.2663	-1.36066	0.348817	-3.90079	9.59e-05	0.00347873	AAEL010021	serine/threonine-protein kinase 38 (ndr2 protein kinase) [Source:VB Community Annotation]
LOC5570046	613.035	-0.722045	0.185301	-3.8966	9.76e-05	0.00352976	AAEL018225
LOC110675324	50.1305	1.34413	0.345483	3.89059	0.000100001	0.00360849	AAEL022120
LOC5580322	58.3573	-1.06357	0.273755	-3.88511	0.000102283	0.0036726	AAEL019989
LOC110681241	84.476	1.56272	0.402245	3.88499	0.000102333	0.0036726	AAEL027458
LOC5573753	335.423	0.612373	0.157657	3.88422	0.000102658	0.00367431	AAEL000270	26S proteasome regulatory subunit 7, psd7 [Source:UniProtKB/TrEMBL;Acc:Q17PP0]
LOC110676861	6333.41	0.586668	0.15109	3.8829	0.000103217	0.00368437	AAEL023187
LOC5564962	1734.83	0.805489	0.207759	3.87704	0.000105735	0.00376412	AAEL014889	NADH:ubiquinone dehydrogenase, putative [Source:VB Community Annotation]
LOC5578265	286.352	0.681873	0.175952	3.87533	0.000106481	0.00378049	AAEL003493	GDI interacting protein, putative [Source:VB Community Annotation]
LOC5577572	696.586	0.635434	0.164049	3.87345	0.000107307	0.00379964	AAEL013281	serine-type enodpeptidase [Source:VB Community Annotation]
LOC5563575	1466.48	1.2782	0.330049	3.87275	0.000107615	0.0038004	AAEL000080	phosphoenolpyruvate carboxykinase [Source:VB Community Annotation]
LOC5567505	324.518	0.63645	0.164424	3.87078	0.000108488	0.00382104	AAEL006118	mitochondrial ribosomal protein, L55 [Source:VB Community Annotation]	mRpL55
LOC5574371	1038.96	-1.10871	0.286534	-3.86939	0.000109108	0.00383266	AAEL011095	n-acetylgalactosaminyltransferase [Source:VB Community Annotation]
LOC5572076	1108.22	-1.30728	0.338079	-3.8668	0.000110275	0.0038634	AAEL019708
LOC5566859	618.815	-0.907528	0.23482	-3.86478	0.00011119	0.00388519	AAEL000822	kinesin-like protein KLP68D [Source:VB Community Annotation]
LOC5574331	464.16	0.796933	0.206248	3.86396	0.000111564	0.00388799	AAEL002331	Mannose-6-phosphate isomerase [Source:UniProtKB/TrEMBL;Acc:Q17IJ3]
LOC5565576	41.8856	1.31648	0.340808	3.86283	0.000112082	0.00389581	AAEL020176
LOC5577355	1034.49	0.909659	0.235575	3.86144	0.000112719	0.00390767	AAEL000458
LOC110679627	79.8958	1.84068	0.476957	3.85922	0.00011375	0.00391395	AAEL022918
LOC110673979	134.235	0.839112	0.217455	3.85878	0.000113954	0.00391395	AAEL001085
LOC5568340	134.235	0.839112	0.217455	3.85878	0.000113954	0.00391395	AAEL001089
LOC110676626	10.6534	3.27741	0.849397	3.85851	0.000114082	0.00391395	AAEL021127
LOC5572471	59.2268	-1.43241	0.372196	-3.84855	0.000118821	0.00405235	AAEL009813	glutamate receptor 7 (ampa) [Source:VB Community Annotation]
LOC5571356	321.6	2.87147	0.746203	3.84811	0.000119033	0.00405235	AAEL008978
LOC5566834	188.912	-0.775606	0.201555	-3.84811	0.000119034	0.00405235	AAEL005674
LOC5573667	770.43	1.02196	0.265842	3.84425	0.00012092	0.004106	AAEL010673	NADH dehydrogenase, putative [Source:VB Community Annotation]
LOC110676873	1363.77	0.62848	0.163635	3.84074	0.000122662	0.00415452	AAEL022726
LOC5563559	1086.11	-6.62266	1.7269	-3.83499	0.000125568	0.0042421	AAEL026496
LOC5575748	128.786	-0.804024	0.21005	-3.82777	0.000129311	0.00435742	AAEL012057	enhancer of polycomb [Source:VB Community Annotation]
LOC5574901	457.816	-0.500196	0.130713	-3.82669	0.000129878	0.00436543	AAEL011506
LOC5570848	775.504	0.644858	0.168589	3.82503	0.000130759	0.00438389	AAEL008624	ABC transporter [Source:VB Community Annotation]
LOC5577637	129.944	1.47935	0.386918	3.82343	0.000131606	0.00440115	AAEL003237	low molecular weight protein-tyrosine-phosphatase [Source:VB Community Annotation]
LOC5564326	442.478	-0.520503	0.136202	-3.82155	0.000132616	0.00442376	AAEL019671
LOC110679214	24.5323	-1.8323	0.479594	-3.82053	0.000133167	0.00443099	AAEL020266
LOC5576470	61.1439	-1.40943	0.369252	-3.81697	0.0001351	0.00448122	AAEL002918	centaurin beta [Source:VB Community Annotation]
LOC5573232	138.494	1.01046	0.264761	3.81651	0.000135354	0.00448122	AAEL010323
LOC5566838	17.25	2.78278	0.729849	3.81281	0.000137393	0.00453741	AAEL029011
LOC110676470	43.155	1.15996	0.304289	3.81204	0.000137826	0.00454038	AAEL026236
LOC5574120	192.189	-1.61935	0.42501	-3.81014	0.000138889	0.00456034	AAEL022600
LOC5580066	153.781	0.978573	0.256862	3.80973	0.000139121	0.00456034	AAEL002148
LOC5563934	61.5682	-3.05118	0.801373	-3.80744	0.000140415	0.0045914	AAEL023492
LOC110675600	4.14828	-5.50241	1.44624	-3.80463	0.000142019	0.0046324	AAEL021818
LOC5564146	496.181	0.588854	0.154798	3.80401	0.000142371	0.00463249	AAEL014325	proteasome regulatory subunits [Source:VB Community Annotation]
LOC5565279	1680.68	0.553569	0.145604	3.80188	0.000143602	0.00466108	AAEL014799
LOC5567984	104.335	0.974655	0.256437	3.80076	0.000144253	0.00467075	AAEL006428	ferredoxin, putative [Source:VB Community Annotation]
LOC5576717	1347.48	2.36986	0.623635	3.80008	0.000144651	0.00467222	AAEL002965	osiris 18 [Source:VB Community Annotation]	Osi18
LOC110678524	12.7675	-7.12265	1.87606	-3.79659	0.0001467	0.00472688	AAEL028010
LOC5567286	2277.72	0.861685	0.227003	3.79592	0.000147097	0.00472818	AAEL005946	NADH-ubiquinone oxidoreductase subunit B14.5b [Source:VB Community Annotation]
LOC5574929	1394.81	0.700602	0.184871	3.78967	0.000150846	0.00483692	AAEL011527	eukaryotic translation initiation factor [Source:VB Community Annotation]
LOC5571537	181.344	-0.807767	0.213239	-3.78809	0.000151809	0.00485606	AAEL009128	cytochrome P450 [Source:VB Community Annotation]	CYP6M6
LOC110675919	87.4665	0.973957	0.257235	3.78626	0.000152934	0.00488026	AAEL023494
LOC5565800	806.141	0.621429	0.164305	3.78217	0.000155468	0.00494919	AAEL005003	serine/threonine-protein kinase, putative [Source:VB Community Annotation]
LOC5577303	90.6669	1.16901	0.309617	3.77568	0.000159573	0.00506768	AAEL013150	Methionine aminopeptidase [Source:UniProtKB/TrEMBL;Acc:Q16K07]
LOC5576440	381.55	0.606001	0.16054	3.77476	0.000160161	0.00507419	AAEL005536	tetraspanin 29fb [Source:VB Community Annotation]
LOC5573923	440.314	-3.13442	0.831168	-3.7711	0.000162528	0.00513689	AAEL002246	cuticle protein, putative [Source:VB Community Annotation]
LOC5578380	1896.91	0.615782	0.163334	3.77008	0.000163198	0.00513898	AAEL013656	bm-40 precursor [Source:VB Community Annotation]
LOC110679636	59.8883	-1.60849	0.426676	-3.76981	0.00016337	0.00513898	AAEL024568
LOC5564193	1071.23	-0.736494	0.195416	-3.76885	0.000163998	0.00514652	AAEL014344	adam (a disintegrin and metalloprotease) [Source:VB Community Annotation]
LOC5565217	15.1372	-1.95026	0.517642	-3.76757	0.000164841	0.00516074	AAEL004669
LOC5569166	81.5799	0.966438	0.256592	3.76644	0.000165589	0.00517192	AAEL007431
LOC5571359	125.197	0.902635	0.240719	3.74974	0.000177019	0.0055159	AAEL008995
LOC5568002	2604.06	0.605167	0.161662	3.74342	0.000181533	0.00563313	AAEL006439	testis/ seletal muscle dual specificty phosphatase [Source:VB Community Annotation]
LOC5567209	94.7187	1.18828	0.317443	3.74328	0.000181632	0.00563313	AAEL000897
LOC5572373	69.4161	-0.94523	0.252674	-3.74091	0.000183354	0.00566723	AAEL009761
LOC5571357	119.429	3.16693	0.846639	3.74059	0.000183587	0.00566723
LOC110678707	3.95194	-5.43599	1.45432	-3.73782	0.00018562	0.00571667	AAEL020039
LOC5569401	224.397	-4.20258	1.12499	-3.73566	0.000187227	0.00575277	AAEL007602	trypsin, putative [Source:VB Community Annotation]
LOC5566698	1090.14	-0.756968	0.202685	-3.73471	0.000187934	0.00575387	AAEL005575	transient receptor potential channel 4, [Source:VB Community Annotation]
LOC5570223	69.125	1.09911	0.29434	3.73415	0.000188353	0.00575387	AAEL008157
LOC5568586	382.71	0.720699	0.19306	3.73304	0.000189184	0.00575387	AAEL001101	ATP-dependent transporter [Source:VB Community Annotation]
LOC5573733	83.3966	-1.11174	0.297812	-3.73301	0.000189202	0.00575387	AAEL000263	Zinc finger protein jing homolog [Source:VB Community Annotation]
LOC5576797	36.938	-1.30076	0.348478	-3.7327	0.000189435	0.00575387	AAEL012782
LOC5565244	140.462	-3.16596	0.848833	-3.72978	0.000191647	0.00580774	AAEL014765
LOC5564856	50.5365	1.06082	0.284669	3.72652	0.000194138	0.00586979	AAEL004465
LOC5569112	85.474	1.93058	0.518523	3.72323	0.000196691	0.00593343	AAEL007369	homeobox protein even skipped [Source:VB Community Annotation]
LOC5567032	16.7006	2.47918	0.665987	3.72257	0.000197205	0.00593406	AAEL005786
LOC5567124	120.45	0.945071	0.25394	3.72163	0.000197937	0.00593406	AAEL023543
LOC5571267	177.181	1.19387	0.320804	3.72148	0.000198056	0.00593406	AAEL001573
LOC110674235	8.32355	2.91632	0.784093	3.71935	0.000199733	0.0059708	AAEL021803
LOC5577233	647.944	1.0709	0.288152	3.71644	0.000202048	0.0060264	AAEL003139	short-chain dehydrogenase [Source:VB Community Annotation]
LOC5571429	2028.58	0.813935	0.21914	3.71422	0.000203828	0.00606584	AAEL009066	symbol, putative [Source:VB Community Annotation]
LOC5573058	82.3314	1.22015	0.328688	3.71219	0.000205476	0.00610028	AAEL010247
LOC23687681	18.8394	-1.74106	0.46908	-3.71166	0.000205907	0.00610028	AAEL028056
LOC5573836	128.912	-1.16245	0.313386	-3.70933	0.000207809	0.0061429	AAEL010757
LOC110680390	423.156	-0.753443	0.203192	-3.70803	0.000208875	0.00616065	AAEL027762
LOC5571360	17.7075	2.27066	0.613541	3.70091	0.000214824	0.00631382	AAEL008989
LOC5571370	64.2558	1.9585	0.529226	3.70068	0.000215022	0.00631382	AAEL008993
LOC5565970	87.2158	1.15908	0.313432	3.69803	0.000217281	0.00636604	AAEL015018	toll [Source:VB Community Annotation]
LOC5570052	195.046	0.67771	0.18338	3.69566	0.00021932	0.00641159	AAEL000210	mitochondrial ribosomal protein L2 [Source:VB Community Annotation]	mRpL2
LOC5576455	119.386	0.992602	0.268691	3.69421	0.000220571	0.00643398	AAEL012538	leucine-rich immune protein (Short) [Source:VB Community Annotation]	LRIM6
LOC5577489	16043.9	-0.531732	0.14411	-3.68977	0.000224455	0.00653288	AAEL013229	Tubulin alpha chain [Source:UniProtKB/TrEMBL;Acc:Q16JS3]
LOC5579216	1611.77	-0.665423	0.180403	-3.68854	0.000225544	0.00655017	AAEL014053	vacuolar proton ATPases [Source:VB Community Annotation]
LOC5572418	184.962	2.21195	0.599932	3.687	0.000226911	0.00657412	AAEL009790	cuticle protein, putative [Source:VB Community Annotation]
LOC5572571	260.354	-1.50265	0.407643	-3.6862	0.000227625	0.00657412	AAEL019534
LOC5574429	919.479	0.719775	0.195276	3.68594	0.000227858	0.00657412	AAEL011157	NADH dehydrogenase, putative [Source:VB Community Annotation]
LOC5571729	329.002	-0.628189	0.170479	-3.68485	0.000228838	0.00658058	AAEL009266	c4b-binding protein beta chain [Source:VB Community Annotation]
LOC5578326	2184.98	1.75776	0.477058	3.68459	0.000229075	0.00658058	AAEL013648	Fatty acyl-CoA reductase [Source:UniProtKB/TrEMBL;Acc:Q16II8]
LOC5565445	320.605	-0.992962	0.269657	-3.68231	0.000231127	0.00662514	AAEL000670	methionine sulfoxide reductase [Source:VB Community Annotation]
LOC110680823	67.7893	1.00055	0.27201	3.67836	0.000234742	0.00669976	AAEL020229
LOC5578931	67.7893	1.00055	0.27201	3.67836	0.000234742	0.00669976	AAEL003755	BolA protein, putative [Source:VB Community Annotation]
LOC5571284	781.808	-0.565092	0.153662	-3.6775	0.000235528	0.00670774	AAEL001540	ubiquitin specific protease [Source:VB Community Annotation]
LOC110679483	18.2641	2.20805	0.601325	3.67197	0.000240683	0.00683985	AAEL021487
LOC5566654	1876.08	0.923454	0.251658	3.66947	0.00024305	0.00689232	AAEL005508	NADH-ubiquinone oxidoreductase 24 kda subunit [Source:VB Community Annotation]
LOC5570219	1582.6	0.775937	0.211822	3.66316	0.000249126	0.00704951	AAEL024456
LOC5569725	527.924	0.478225	0.130626	3.66102	0.000251216	0.0070935	AAEL007885	translation initiation factor-3 (IF3), putative [Source:VB Community Annotation]
LOC5565390	204.196	1.74851	0.478233	3.65619	0.000255996	0.00721311	AAEL004742	pupal cuticle protein, putative [Source:VB Community Annotation]
LOC5580117	181.865	1.79663	0.491856	3.65276	0.000259434	0.00728373	AAEL022296
LOC5569968	14737.5	0.488696	0.133794	3.6526	0.000259603	0.00728373	AAEL020092
LOC5573589	466.205	-4.25381	1.16482	-3.65191	0.000260301	0.0072851	AAEL002132
LOC5579504	780.64	2.30469	0.63117	3.65146	0.000260752	0.0072851	AAEL015222	adult cuticle protein, putative [Source:VB Community Annotation]
LOC5568054	2585.22	0.610661	0.167266	3.65083	0.000261396	0.00728772	AAEL006480
LOC110677063	5155.92	1.1063	0.303316	3.64734	0.000264968	0.00737178	AAEL021930
LOC5569629	2490.49	0.673796	0.184767	3.64673	0.000265594	0.00737371	AAEL007787	5-aminolevulinic acid synthase [Source:VB Community Annotation]
LOC110675555	3.65718	-5.31996	1.45898	-3.64636	0.00026598	NA	AAEL020767
LOC5572441	49.7677	1.08829	0.298717	3.6432	0.000269265	0.00745999	AAEL001807	cytochrome P450 [Source:VB Community Annotation]	CYP9M9
LOC5568805	336.537	0.616814	0.169416	3.64082	0.000271767	0.00751358	AAEL001170	Protein phosphatase methylesterase 1 [Source:UniProtKB/TrEMBL;Acc:Q17M26]
LOC5565111	122.536	-3.30788	0.910045	-3.63486	0.000278135	0.00765798	AAEL004588
LOC5571874	533.754	-0.482102	0.132633	-3.63485	0.000278146	0.00765798	AAEL024528
LOC5578183	462.386	-0.557354	0.153452	-3.6321	0.000281121	0.00772031	AAEL024112
LOC5578992	421.638	-0.488217	0.134433	-3.63169	0.000281576	0.00772031	AAEL024720
LOC5563591	500.624	0.995401	0.274333	3.62844	0.000285139	0.00780185	AAEL000006	phosphoenolpyruvate carboxykinase [Source:VB Community Annotation]
LOC110674796	198.924	0.628871	0.173524	3.62412	0.000289948	0.00790789	AAEL022712
LOC5572913	3584.35	3.99923	1.10357	3.62389	0.000290209	0.00790789
LOC5572561	222.42	0.588761	0.162553	3.62195	0.000292388	0.00795091	AAEL009894	leucine-rich immune protein (Coil-less) [Source:VB Community Annotation]	LRIM21
LOC5563695	514.049	-0.503889	0.139157	-3.62101	0.000293452	0.0079635	AAEL000549	fibulin 1 and [Source:VB Community Annotation]
LOC5564534	449.179	0.518582	0.143303	3.61878	0.000295996	0.00801611	AAEL025656
LOC5576653	22699.5	-0.544098	0.150442	-3.61665	0.000298441	0.00802964	AAEL012686	40S ribosomal protein S23 [Source:UniProtKB/TrEMBL;Acc:Q1HRM5]	RpS23
LOC5577638	54.8586	1.14506	0.316609	3.61664	0.000298453	0.00802964	AAEL003214	salivary gland growth factor [Source:VB Community Annotation]
LOC110678697	4.20262	-5.53817	1.53135	-3.61652	0.000298595	0.00802964	AAEL026339
LOC5564317	411.093	0.567444	0.156916	3.61623	0.000298921	0.00802964	AAEL000568	26S proteasome non-ATPase regulatory subunit [Source:UniProtKB/TrEMBL;Acc:Q17NV4]
LOC5579227	371.689	0.548398	0.151712	3.61472	0.000300668	0.00805739	AAEL014064	glutaredoxin, putative [Source:VB Community Annotation]
LOC5570003	256.501	-0.84901	0.234904	-3.61429	0.000301171	0.00805739	AAEL019905
LOC5578886	705.137	-0.796075	0.220325	-3.61319	0.000302454	0.00806367	AAEL013887
LOC5565212	217.247	-0.604918	0.167429	-3.61299	0.000302691	0.00806367	AAEL004678	rhomboid [Source:VB Community Annotation]
LOC5579306	143.353	0.942214	0.260819	3.61252	0.000303232	0.00806367	AAEL015598
LOC5566857	323.118	1.67443	0.464067	3.60817	0.000308366	0.00818374	AAEL000834	dimethylaniline monooxygenase [Source:VB Community Annotation]
LOC110675983	564.22	0.661069	0.183403	3.60447	0.000312796	0.00828473	AAEL024191
LOC5576107	4051	0.890479	0.247289	3.60097	0.000317038	0.00836179	AAEL002813	coupling factor, putative [Source:VB Community Annotation]
LOC5570824	54.4702	1.26814	0.352185	3.60078	0.00031727	0.00836179	AAEL008600	zinc carboxypeptidase [Source:VB Community Annotation]
LOC5576223	1710.24	0.846054	0.234982	3.6005	0.0003176	0.00836179	AAEL002825	NADH:ubiquinone dehydrogenase, putative [Source:VB Community Annotation]
LOC110674477	31.3654	-1.26631	0.351901	-3.59847	0.00032009	0.00841061	AAEL024110
LOC5574537	233.908	0.738749	0.205451	3.59574	0.000323475	0.00848272	AAEL011212	nuclear transcription factor, x-box binding 1 (nfx1) [Source:VB Community Annotation]
LOC5577688	1866.92	2.06198	0.573671	3.59436	0.000325184	0.00851069	AAEL026278
LOC5579929	107.921	1.15667	0.322003	3.5921	0.000328018	0.00856793	AAEL006805	cytochrome P450 [Source:VB Community Annotation]	CYP9J2
LOC110681452	519.287	0.58799	0.163748	3.59082	0.000329644	0.00859345	AAEL022341
LOC5578147	450.852	0.629977	0.175527	3.58905	0.000331884	0.00863485	AAEL013528	thioredoxin peroxidase [Source:VB Community Annotation]	TPX1
LOC5574673	310.06	0.628039	0.175086	3.58704	0.000334459	0.00866587	AAEL011315
LOC5564807	135.381	-0.70541	0.196674	-3.58669	0.000334899	0.00866587	AAEL009593
LOC110676233	14.1721	1.83639	0.512018	3.58658	0.000335039	0.00866587	AAEL024833
LOC110680233	114.046	1.03323	0.288173	3.58547	0.000336478	0.0086861	AAEL022169
LOC5570038	64.5848	-1.18702	0.331224	-3.58374	0.000338706	0.00872662	AAEL019858
LOC110677885	7.69696	-3.06607	0.855917	-3.58221	0.0003407	0.00876094	AAEL006494	gustatory receptor (Gr45) [Source:VB Community Annotation]	Gr45	GPRgr45
LOC5571928	237.661	0.658914	0.183978	3.58147	0.000341661	0.00876738	AAEL009413
LOC5569906	583.959	1.2466	0.348114	3.58101	0.000342274	0.00876738	AAEL008001
LOC5564058	187.163	0.721514	0.201704	3.57709	0.00034744	0.00888252	AAEL004069	mitochondrial 28S ribosomal protein S14 (s14mt) [Source:VB Community Annotation]	mRpS14
LOC5570466	253.931	-0.563618	0.157618	-3.57586	0.000349083	0.00890733	AAEL008354	gaba receptor invertebrate [Source:VB Community Annotation]
LOC110678907	6.81114	-5.22481	1.46209	-3.57352	0.000352215	0.00896997	AAEL026102
LOC110677813	109.549	1.48143	0.414625	3.57295	0.000352982	0.00897225	AAEL024098
LOC5575607	196.746	-0.614898	0.172168	-3.57151	0.000354935	0.00900461	AAEL011941	oxidase/peroxidase [Source:VB Community Annotation]
LOC5570019	390.078	0.633452	0.177492	3.5689	0.00035848	0.00907715	AAEL000180	mitochondrial ribosomal protein, L17 [Source:VB Community Annotation]	mRpL17
LOC5576362	9398.34	0.357309	0.100167	3.56713	0.000360908	0.0091212	AAEL002879	heterogeneous nuclear ribonucleoprotein r [Source:VB Community Annotation]
LOC110679715	9.197	2.55357	0.716749	3.56272	0.000367036	0.0092584	AAEL024869
LOC5565467	387.474	-0.565944	0.158938	-3.56079	0.000369739	0.00929613	AAEL004793	dipeptidyl-peptidase [Source:VB Community Annotation]
LOC110675359	34.8084	1.95337	0.548655	3.56028	0.000370455	0.00929613	AAEL020424
LOC5568755	38.9181	1.98409	0.557304	3.56015	0.000370638	0.00929613	AAEL007103	leucine-rich immune protein (TM) [Source:VB Community Annotation]	LRIM15
LOC110674882	20.0263	2.3495	0.660212	3.55871	0.000372679	0.00932907	AAEL023911
LOC110675956	6.48494	-4.22543	1.18751	-3.55823	0.00037336	0.00932907	AAEL024728
LOC5570020	2392.76	0.911882	0.256339	3.55732	0.000374652	0.00933041	AAEL000182
LOC5564252	234.634	0.71863	0.202021	3.5572	0.000374823	0.00933041	AAEL004180
LOC5564597	459.174	-0.538411	0.151421	-3.55571	0.000376961	0.00936604	AAEL021738
LOC5566404	825.227	0.764262	0.215085	3.5533	0.000380428	0.00942962	AAEL015151	acid phosphatase [Source:VB Community Annotation]
LOC110676837	21.0758	-1.46089	0.411177	-3.55294	0.000380944	0.00942962	AAEL022401
LOC5576721	401.465	0.637262	0.179443	3.55133	0.000383296	0.00945249	AAEL023334
LOC5579244	401.465	0.637262	0.179443	3.55133	0.000383296	0.00945249	AAEL023330
LOC110677038	16.4083	1.88676	0.531441	3.55027	0.000384842	0.00947299	AAEL024275
LOC5580149	1064.96	1.53243	0.43178	3.54911	0.000386539	0.00949479	AAEL002449
LOC23687606	34.69	-1.34999	0.380419	-3.54868	0.000387162	0.00949479	AAEL017186	ATP-dependent DNA helicase PIF1 [Source:UniProtKB/TrEMBL;Acc:J9HF21]
LOC5564024	156.19	0.721269	0.203436	3.54543	0.000391975	0.00959506	AAEL014282	signalosome subunit [Source:VB Community Annotation]
LOC5568290	1334.7	3.32367	0.938155	3.54277	0.000395948	0.00967443	AAEL006756
LOC23687822	8518.67	0.918788	0.259484	3.54082	0.00039888	0.00972813	AAEL017402
LOC110681560	33.7789	1.48652	0.420001	3.53932	0.000401155	0.00976562	AAEL021796
LOC5570670	2333.23	0.76163	0.215661	3.53161	0.000413033	0.010034	AAEL008490	NADH dehydrogenase, putative [Source:VB Community Annotation]
LOC5579119	331.019	1.41745	0.40141	3.53119	0.000413696	0.010034	AAEL003840	galectin [Source:VB Community Annotation]	GALE11
LOC110676353	749.181	2.6105	0.74108	3.52256	0.000427403	0.0103343	AAEL024623
LOC5570381	26.0956	-1.58868	0.451021	-3.52241	0.000427638	0.0103343	AAEL018153
LOC5574913	175.711	-0.623153	0.176979	-3.52106	0.000429824	0.01035	AAEL022370
LOC110675800	14.0182	1.81593	0.515736	3.52105	0.000429848	0.01035	AAEL022428
LOC110678075	3.3985	-5.22336	1.48362	-3.52068	0.000430441	NA	AAEL019815
LOC110674880	19.213	2.3595	0.671505	3.51376	0.000441817	0.0106188	AAEL024432
LOC5567496	138.934	0.770723	0.219513	3.51107	0.000446313	0.0107018	AAEL000963
LOC110679022	1083.77	-0.77343	0.220305	-3.51073	0.000446885	0.0107018	AAEL027644
LOC5575913	19.525	1.60378	0.45705	3.50897	0.000449839	0.0107531	AAEL012157
LOC5570041	1351.42	-0.441028	0.125727	-3.50781	0.000451807	0.0107807	AAEL000172
LOC110678647	1301.26	-0.401648	0.114529	-3.50696	0.000453253	0.0107813	AAEL026946
LOC5566736	11.8469	2.18009	0.621713	3.50658	0.000453901	0.0107813	AAEL019920
LOC110678982	139.567	0.767915	0.219006	3.50636	0.000454276	0.0107813	AAEL021108
LOC5572547	5005.33	0.468418	0.133698	3.50356	0.000459081	0.0108759	AAEL009872	alanine aminotransferase [Source:VB Community Annotation]
LOC110681504	572.317	0.916435	0.262214	3.49499	0.000474073	0.011211	AAEL020472
LOC110675810	364.851	0.479374	0.137249	3.49273	0.000478109	0.0112863	AAEL009183	cytochrome oxidase biogenesis protein (oxa1 mitochondrial) [Source:VB Community Annotation]
LOC5564297	701.15	0.485076	0.139309	3.48202	0.000497651	0.0117267	AAEL000590	Defense repressor 1 [Source:VB Community Annotation]	DNR1
LOC110681087	7104.81	-0.585587	0.168326	-3.47889	0.000503496	0.0118411	AAEL025939
LOC5575223	12353	0.611977	0.175954	3.47805	0.000505083	0.0118411	AAEL010608	succinate dehydrogenase [Source:VB Community Annotation]
LOC5573274	181.218	2.28215	0.656169	3.47799	0.000505191	0.0118411	AAEL010380	aldehyde oxidase [Source:VB Community Annotation]
LOC5571372	134.504	2.45549	0.706928	3.47346	0.000513795	0.0120215	AAEL008982	adult cuticle protein, putative [Source:VB Community Annotation]
LOC5579824	3826.86	-2.49101	0.717505	-3.47177	0.000517038	0.0120761	AAEL027790
LOC5577675	1829.62	0.512277	0.147578	3.47122	0.000518099	0.0120795	AAEL013309	high-affinity copper uptake protein [Source:VB Community Annotation]
LOC5568708	1914.76	0.94007	0.270893	3.47027	0.000519942	0.0120845	AAEL007054	NADH dehydrogenase, putative [Source:VB Community Annotation]
LOC5573830	15799.5	0.794482	0.228953	3.47006	0.000520334	0.0120845	AAEL010754	Mitochondrial ATP synthase F chain [Source:UniProtKB/TrEMBL;Acc:Q1HRJ7]
LOC110680599	108.585	1.13766	0.327885	3.4697	0.000521048	0.0120845	AAEL024585
LOC5580315	22406.8	0.698657	0.201468	3.46783	0.000524677	0.0121474	AAEL012897	aconitase, mitochondrial [Source:VB Community Annotation]
LOC5569746	23.2514	-1.66605	0.480499	-3.46733	0.000525656	0.0121488	AAEL007875
LOC5568205	198.622	0.729385	0.210455	3.46576	0.000528737	0.0121987	AAEL006652
LOC5564085	331.205	-0.687444	0.198471	-3.4637	0.000532793	0.0122709	AAEL014303	neuroligin, [Source:VB Community Annotation]
LOC5564053	5170.11	0.808285	0.23343	3.46264	0.000534896	0.012298	AAEL004060
LOC5572912	167.864	4.02935	1.16428	3.46082	0.000538541	0.0123603	AAEL021218
LOC5566851	304.465	-0.515129	0.149227	-3.45199	0.000556471	0.0127497	AAEL000803
LOC5566608	2048.99	0.542502	0.157445	3.44566	0.000569673	0.0130101	AAEL000791
LOC5576353	10857.3	0.831748	0.241394	3.4456	0.000569799	0.0130101	AAEL002881	NADH:ubiquinone dehydrogenase, putative [Source:VB Community Annotation]
LOC5579888	3238.17	-1.5281	0.443726	-3.44379	0.000573614	0.0130746	AAEL001046	phosphatase fragment [Source:VB Community Annotation]
LOC5565774	2740.21	0.685015	0.19925	3.43796	0.000586113	0.0132937	AAEL004988	Phosphoglycerate kinase [Source:UniProtKB/TrEMBL;Acc:Q8WQL0]	Pgk
LOC5564039	900.475	0.62998	0.183269	3.43747	0.00058718	0.0132937	AAEL004065
LOC110679087	9.70118	-2.85775	0.831551	-3.43665	0.000588961	0.0132937	AAEL025177
LOC5569737	21.123	-1.60221	0.466225	-3.43656	0.000589154	0.0132937	AAEL007876	tyrosine protein kinase with ig domain [Source:VB Community Annotation]
LOC5576989	30.8851	-1.33896	0.389639	-3.4364	0.000589492	0.0132937	AAEL003088
LOC5569150	174.548	1.01163	0.29443	3.43588	0.000590639	0.0132937	AAEL021595
LOC5564943	52.7119	0.929675	0.270649	3.43499	0.000592585	0.0132937	AAEL004486	valacyclovir hydrolase [Source:VB Community Annotation]
LOC110680580	76.3141	0.80633	0.234747	3.43489	0.000592787	0.0132937	AAEL025197
LOC5572800	76.3141	0.80633	0.234747	3.43489	0.000592787	0.0132937	AAEL001909	mitochondrial ribosomal protein, S21, putative [Source:VB Community Annotation]	mRpS21
LOC5572778	283.247	0.517059	0.150541	3.43468	0.000593264	0.0132937	AAEL010048	26S proteasome non-ATPase regulatory subunit [Source:VB Community Annotation]
LOC5571369	274.112	2.52363	0.734852	3.4342	0.000594316	0.0132948	AAEL008969	adult cuticle protein, putative [Source:VB Community Annotation]
LOC5565534	192.971	-0.812888	0.236739	-3.4337	0.000595412	0.0132969	AAEL019740
LOC5572773	138.238	-0.813676	0.237017	-3.43299	0.000596959	0.0133078	AAEL010041
LOC5574753	46.2485	1.09889	0.320137	3.43256	0.000597912	0.0133078	AAEL011377
LOC5577608	320.538	2.41592	0.704457	3.42947	0.000604752	0.013422	AAEL003221	pupal cuticle protein 78E, putative [Source:VB Community Annotation]
LOC5569487	1998.93	0.591375	0.172446	3.42933	0.000605068	0.013422	AAEL027189
LOC5573025	60.8663	-4.808	1.40365	-3.42535	0.000614017	0.0135977	AAEL010196	trypsin [Source:VB Community Annotation]
LOC5569220	2362.7	1.52803	0.446872	3.41939	0.000627623	0.0138758	AAEL007483
LOC5576785	16.9773	-3.08514	0.902615	-3.418	0.000630833	0.0139235	AAEL023732
LOC5565755	492.929	-0.647653	0.189511	-3.41749	0.000632003	0.0139262	AAEL004978	DEAD box ATP-dependent RNA helicase [Source:VB Community Annotation]
LOC23687495	2799.68	-0.45665	0.133768	-3.41374	0.00064077	0.0140959	AAEL017075
LOC110676151	143.889	-2.05612	0.602546	-3.41238	0.000643972	0.0141428	AAEL022658
LOC23687863	36.8889	-1.13284	0.332061	-3.41153	0.000645992	0.0141637	AAEL017443
LOC5574293	99.3554	-0.768625	0.225523	-3.40818	0.000653966	0.0142915	AAEL021092
LOC23687553	240.899	1.00308	0.294316	3.40818	0.000653979	0.0142915	AAEL017133
LOC5579199	8009.05	0.775783	0.227725	3.40666	0.000657629	0.0143476	AAEL014039
LOC5565617	437.746	0.856273	0.251477	3.40497	0.000661708	0.0144128	AAEL004868	hemomucin [Source:VB Community Annotation]
LOC5577499	1218.28	-0.562769	0.165336	-3.40378	0.000664601	0.0144521	AAEL003193	inorganic pyrophosphatase [Source:VB Community Annotation]
LOC5565794	723.251	2.8353	0.833145	3.40313	0.000666181	0.0144627	AAEL024338
LOC5573699	62.833	-1.11732	0.328714	-3.39908	0.000676124	0.0146545	AAEL010682	armc4 [Source:VB Community Annotation]
LOC5567450	146.058	-3.69192	1.08679	-3.3971	0.000681033	0.0147289	AAEL006094
LOC5579259	91.673	0.879604	0.258973	3.39651	0.000682511	0.0147289	AAEL015653	1-hydroxy-2-glutathionyl-2-methyl-3-butene dehydrogenase, putative [Source:VB Community Annotation]
LOC5572414	94.4713	3.21982	0.948244	3.39556	0.000684894	0.0147289	AAEL009788	cuticle protein, putative [Source:VB Community Annotation]
LOC5571371	365.75	1.87759	0.552972	3.39546	0.000685134	0.0147289	AAEL009013	adult cuticle protein, putative [Source:VB Community Annotation]
LOC110679441	116.503	-0.724442	0.213358	-3.39543	0.000685221	0.0147289	AAEL020344
LOC5567291	117.343	0.761248	0.224225	3.39502	0.00068623	0.0147289	AAEL005944	mitochondrial ribosomal protein, S23, putative [Source:VB Community Annotation]	mRpS23
LOC5573360	727.969	0.602463	0.177665	3.39101	0.000696362	0.0148981	AAEL010456
LOC5573361	727.969	0.602463	0.177665	3.39101	0.000696362	0.0148981	AAEL010450	mitochondrial import inner membrane translocase subunit TIM10 [Source:VB Community Annotation]	TIM10
LOC5569936	1322.42	0.610714	0.180168	3.3897	0.000699696	0.0149453	AAEL008025
LOC5570907	558.02	-0.462269	0.136434	-3.38822	0.000703475	0.0150018	AAEL001480	phosphoglucomutase [Source:VB Community Annotation]
LOC5571085	159.525	-0.940589	0.277654	-3.38763	0.000704986	0.0150098	AAEL008820
LOC110678788	30.7955	3.55043	1.04923	3.38385	0.000714763	0.0151936	AAEL023707
LOC5563973	46.4088	-3.29105	0.973539	-3.3805	0.00072353	0.0153348	AAEL004015	glucose dehydrogenase [Source:VB Community Annotation]
CFI06_mgt18	300.238	0.743038	0.219806	3.38043	0.000723721	0.0153348
LOC5577603	7.50464	-2.71474	0.803411	-3.37902	0.000727441	0.0153885	AAEL029009
LOC110674016	777.445	-1.25328	0.370956	-3.37851	0.000728804	0.0153885	AAEL022632
LOC5576719	2892.31	3.09025	0.914775	3.37815	0.00072974	0.0153885	AAEL002955
LOC5573478	605.775	-0.560679	0.166276	-3.37197	0.000746321	0.0157037	AAEL010520
LOC110674063	140.152	-0.799887	0.237236	-3.3717	0.000747062	0.0157037	AAEL023680
LOC5576188	1708.74	0.585928	0.174002	3.36736	0.000758912	0.0159275	AAEL012383	protein serine/threonine kinase, putative [Source:VB Community Annotation]
LOC5572460	188.365	-1.01168	0.300631	-3.3652	0.000764873	0.0160272	AAEL001812	organic anion transporter [Source:VB Community Annotation]
LOC5572380	285.554	-2.52367	0.750456	-3.36284	0.000771438	0.0161393	AAEL009762	cytochrome P450 [Source:VB Community Annotation]	CYP307A1
LOC5576718	2090.67	2.58839	0.770054	3.36131	0.000775732	0.0161958	AAEL002960	osiris 19 [Source:VB Community Annotation]	Osi19
LOC110675779	12.8464	-3.36153	1.00018	-3.36093	0.000776798	0.0161958	AAEL027941
LOC5565346	119.297	0.783446	0.233207	3.35944	0.000781009	0.0161958	AAEL014836	28S ribosomal protein S15, mitochondrial precursor [Source:UniProtKB/TrEMBL;Acc:Q16FB6]	mRpS15
LOC5576573	168.247	1.12136	0.333811	3.35928	0.000781465	0.0161958	AAEL023549
LOC5576237	13640.7	-0.590574	0.175816	-3.35905	0.000782103	0.0161958	AAEL018288
LOC5575843	706.74	0.480988	0.143195	3.35898	0.0007823	0.0161958	AAEL012122	26S proteasome regulatory subunit S3 [Source:UniProtKB/TrEMBL;Acc:Q16N14]
LOC5566759	5270.32	0.942819	0.280698	3.35884	0.000782703	0.0161958	AAEL005622
LOC5563726	134.896	-0.832695	0.247954	-3.35826	0.000784351	0.0162046	AAEL014079	serine protease inhibitor, serpin [Source:VB Community Annotation]
LOC5574241	45.9808	-2.37161	0.706799	-3.35542	0.000792432	0.0163447	AAEL027798
LOC5569013	4312.47	1.18008	0.35175	3.35488	0.000793998	0.0163447	AAEL007298	Fatty acyl-CoA reductase [Source:UniProtKB/TrEMBL;Acc:Q172Q8]
LOC23687785	97.7882	-0.783643	0.233603	-3.35459	0.000794833	0.0163447	AAEL021495
LOC5575817	618.624	-0.709396	0.211502	-3.35408	0.000796299	0.0163494	AAEL012089
LOC5572524	18.6836	3.34635	0.997859	3.35354	0.00079786	0.0163561	AAEL023271
LOC5576541	1686.49	-0.532677	0.158961	-3.35098	0.000805248	0.0164755	AAEL025130
LOC5568428	760.781	1.25879	0.375685	3.35067	0.000806173	0.0164755	AAEL006836	dihydropteridine reductase [Source:VB Community Annotation]
LOC110676379	66.456	-2.63316	0.786409	-3.34834	0.000812969	0.0165782	AAEL027145
LOC5571976	2521.58	-0.881425	0.263262	-3.34809	0.0008137	0.0165782	AAEL009467
LOC5564545	519.594	0.453373	0.135441	3.34737	0.000815816	0.0165958	AAEL004308	Proteasome subunit alpha type [Source:UniProtKB/TrEMBL;Acc:Q1HQN1]
LOC5573615	4268.24	0.653306	0.195226	3.34641	0.000818656	0.016628	AAEL010611	Acyl carrier protein [Source:UniProtKB/TrEMBL;Acc:Q16PC9]
LOC5573280	358.563	3.13605	0.937392	3.34551	0.000821326	0.0166567	AAEL010367	aldehyde oxidase [Source:VB Community Annotation]
LOC5572417	145.394	2.48899	0.744781	3.34191	0.000832034	0.016848	AAEL020010
LOC5578763	149.335	0.646922	0.1937	3.33982	0.000838328	0.0169496	AAEL003704	39S ribosomal protein L13, mitochondrial [Source:UniProtKB/TrEMBL;Acc:Q17ET7]	mRpL13
LOC110676911	136.36	-0.7793	0.233375	-3.33927	0.000839997	0.0169523	AAEL027832
LOC5575847	107.307	0.875927	0.262338	3.33893	0.000841024	0.0169523	AAEL012126	F-box/lrr protein, drome [Source:VB Community Annotation]
LOC5568610	37.6462	1.21533	0.364145	3.3375	0.000845356	0.0170138	AAEL028171
LOC110674429	9.09428	-3.67031	1.10004	-3.33651	0.000848378	0.0170394	AAEL023703
LOC5580074	4502.99	0.368753	0.11053	3.33624	0.000849202	0.0170394	AAEL002178
LOC5566258	19.8254	1.55788	0.467151	3.33486	0.000853414	0.0170974	AAEL015116	prophenoloxidase [Source:VB Community Annotation]
LOC110678930	8.1458	-2.60601	0.78166	-3.33394	0.000856253	0.0170974	AAEL017549	GPCR Orphan/Putative Class A Family [Source:VB Community Annotation]	GPRNNA14
LOC5578625	18121.9	-0.494226	0.148245	-3.33386	0.00085651	0.0170974	AAEL003582	40S ribosomal protein S13 [Source:UniProtKB/TrEMBL;Acc:Q5QC94]	RpS13
LOC5577963	27.8807	-4.78096	1.43417	-3.33361	0.000857259	0.0170974	AAEL025575
LOC110678527	3.00891	-5.03657	1.51149	-3.33218	0.000861693	NA	AAEL020209
LOC5571002	525.515	-0.579483	0.173919	-3.33191	0.000862519	0.0171764	AAEL019511
LOC5576515	2122.74	1.12616	0.338621	3.32571	0.00088194	0.0175368	AAEL012575	serine protease, putative [Source:VB Community Annotation]
LOC5570667	97.2825	0.822926	0.247816	3.32071	0.000897891	0.0178272	AAEL008486	protein kinase C inhibitor, putative [Source:VB Community Annotation]
LOC5564792	567.991	-0.475225	0.143193	-3.31876	0.000904174	0.0179251	AAEL004445	DEAD box ATP-dependent RNA helicase [Source:VB Community Annotation]
LOC5568828	1174.73	0.658716	0.198837	3.31284	0.00092353	0.0182518	AAEL001164	NADH:ubiquinone dehydrogenase, putative [Source:VB Community Annotation]
LOC5575435	184.583	0.672435	0.202983	3.31276	0.0009238	0.0182518	AAEL002644
LOC5576334	19.9847	-1.40632	0.424556	-3.31246	0.00092479	0.0182518	AAEL000403
LOC5578594	82.3423	0.927935	0.280448	3.30876	0.000937099	0.0184673	AAEL013771	mitochondrial ribosomal protein, L54, putative [Source:VB Community Annotation]	mRpL54
LOC110676721	3.1523	-5.12254	1.54821	-3.30868	0.000937352	NA	AAEL026019
LOC110678045	87.4929	0.898557	0.271692	3.30726	0.000942134	0.0185204	AAEL024371
LOC5567198	25.2215	-1.34777	0.407536	-3.30712	0.000942592	0.0185204	AAEL019837
LOC5568685	639.118	0.840083	0.254161	3.30532	0.000948667	0.0186121	AAEL018130	TGF-B activated kinase 1 [Source:VB Community Annotation]	TAK1
LOC5572891	109.072	0.820175	0.248197	3.30453	0.000951352	0.0186372	AAEL010099	4-nitrophenylphosphatase [Source:VB Community Annotation]
LOC5565132	234.387	0.653835	0.198103	3.30048	0.000965188	0.0188803	AAEL022505
LOC5571609	5140.06	0.854791	0.259117	3.29887	0.000970762	0.0189614	AAEL009201
LOC5564940	511.161	-1.69659	0.51456	-3.29717	0.00097663	0.0190461	AAEL027518
LOC5567528	138.683	0.655997	0.198981	3.29679	0.000977977	0.0190461	AAEL006129	Deoxyhypusine hydroxylase [Source:UniProtKB/TrEMBL;Acc:Q177G8]
LOC5578638	869.033	1.0744	0.326151	3.2942	0.000987026	0.0191919	AAEL013789
LOC5576659	90.8914	-0.975816	0.296257	-3.29382	0.00098836	0.0191919	AAEL012689	Glucose-methanol-choline (gmc) oxidoreductase [Source:UniProtKB/TrEMBL;Acc:A0A1S4FWX8]
LOC5576331	290.615	-0.619209	0.188252	-3.28925	0.00100454	0.0194776	AAEL022485
LOC110679086	9.62303	2.11061	0.641783	3.28867	0.00100663	0.0194894	AAEL023184
LOC5564161	1578.52	0.473579	0.144037	3.28791	0.00100935	0.0194956	AAEL004148	heat shock protein 70 (hsp70)-interacting protein [Source:VB Community Annotation]
LOC5570221	50.7576	1.14332	0.347774	3.28753	0.00101072	0.0194956	AAEL008165
LOC5571738	847.881	-0.597511	0.181761	-3.28735	0.00101136	0.0194956	AAEL009259
LOC5567538	418.821	-0.88855	0.270381	-3.28629	0.00101516	0.0195403	AAEL006144	isopentenyl-diphosphate delta isomerase [Source:VB Community Annotation]	IPPI
LOC110679216	726.891	-1.97608	0.601549	-3.28498	0.00101989	0.0196029	AAEL021166
LOC5575797	116.395	0.777385	0.236683	3.28451	0.00102162	0.0196076	AAEL012074	Putative mitochondrial/ ribosomal protein [Source:UniProtKB/TrEMBL;Acc:A0A0N8ES33]
LOC5571915	17.9312	-1.6485	0.502017	-3.28376	0.00102434	0.0196242	AAEL018177
LOC5564469	965.512	0.574998	0.17512	3.28345	0.00102544	0.0196242	AAEL014452	acyl-coa dehydrogenase [Source:VB Community Annotation]
LOC5568738	1416.09	2.59948	0.791927	3.28247	0.00102903	0.0196644	AAEL007095	adult cuticle protein, putative [Source:VB Community Annotation]
LOC5578080	52.4182	1.02035	0.311501	3.27558	0.00105444	0.0201041	AAEL003435
LOC5575531	268.873	-0.651248	0.198829	-3.27541	0.00105507	0.0201041	AAEL011907
LOC110676017	4630	2.58915	0.790806	3.27407	0.0010601	0.0201708	AAEL024044
LOC5567793	1926.68	0.819853	0.250577	3.27185	0.00106844	0.0202954	AAEL000138	NADH dehydrogenase, putative [Source:VB Community Annotation]
LOC5567494	510.991	0.599109	0.183129	3.27152	0.00106971	0.0202954	AAEL000941	mitochondrial inner membrane protein translocase, 8kD-subunit, putative [Source:VB Community Annotation]
LOC5577597	3.10198	-5.08946	1.55678	-3.26923	0.00107842	NA	AAEL003241
LOC110675497	4.0882	-5.49337	1.68095	-3.26801	0.00108306	0.0205193	AAEL026629
LOC110674164	274.434	0.646433	0.197904	3.26639	0.00108927	0.0206074	AAEL011982	cortactin [Source:VB Community Annotation]
LOC5564092	15.3909	-2.54462	0.779538	-3.26426	0.0010975	0.0207335	AAEL022882
LOC5571511	1423.36	-0.458957	0.140622	-3.26376	0.00109946	0.020741	AAEL001616	vesicular-fusion protein nsf [Source:VB Community Annotation]
LOC5572582	643.976	0.512147	0.157011	3.26185	0.00110687	0.0208511	AAEL009898	26S proteasome alpha 1 subunit [Source:VB Community Annotation]	Prosalpha1
LOC110678544	40.8832	-1.31977	0.405071	-3.25812	0.00112152	0.021097	AAEL026924
LOC5567245	2212.95	-0.437949	0.1345	-3.25612	0.00112946	0.0212163	AAEL019654
LOC5565337	52.6421	0.857613	0.263557	3.25399	0.00113796	0.0213456	AAEL014831	RNA polymerase II subunit Rpb10, putative [Source:VB Community Annotation]
LOC5572945	148.341	-0.850072	0.261329	-3.25287	0.00114244	0.0213798	AAEL010162
LOC5564809	4143.69	0.429932	0.132176	3.25273	0.00114301	0.0213798	AAEL014630	cytochrome C1 heme lyase [Source:VB Community Annotation]
LOC110681427	113.023	0.800785	0.246255	3.25185	0.00114655	0.0214157	AAEL024350
LOC5566538	109.279	-0.964784	0.297	-3.24843	0.00116044	0.0216446	AAEL018342
LOC110679257	2.86421	-4.96288	1.52806	-3.24783	0.00116291	NA	AAEL026635
LOC5564798	5792.72	0.748725	0.230576	3.24719	0.00116551	0.0217085	AAEL004423	mitochondrial F0 ATP synthase D chain, putative [Source:VB Community Annotation]
LOC5572432	1096.98	-0.740872	0.228196	-3.24664	0.00116776	0.02172	AAEL001810
LOC110676915	78.2181	-1.10757	0.341246	-3.24568	0.00117172	0.021763	AAEL026493
LOC110676515	129.314	0.811606	0.250125	3.2448	0.00117535	0.0217999	AAEL023511
LOC5572443	12.5802	-1.81614	0.559989	-3.24318	0.00118205	0.0218935	AAEL024197
LOC5576854	4129.4	1.02628	0.31696	3.23788	0.0012042	0.0222727	AAEL012837
LOC5576488	258.375	-0.723344	0.223678	-3.23386	0.00122129	0.0225411	AAEL002900
LOC5566662	1662.79	0.680596	0.210498	3.23327	0.00122382	0.0225411	AAEL023078
LOC5566909	1662.79	0.680596	0.210498	3.23327	0.00122382	0.0225411	AAEL023078
LOC110676045	26112.5	-0.469614	0.145408	-3.22962	0.00123953	0.0227988	AAEL022286	40S ribosomal protein S27 [Source:UniProtKB/TrEMBL;Acc:Q1HR58]
LOC5575143	237.052	0.643101	0.199167	3.22895	0.00124246	0.022821	AAEL012974	Glycine cleavage system H protein [Source:UniProtKB/TrEMBL;Acc:Q0IE94]
LOC5567287	152.2	-0.767294	0.237667	-3.22845	0.00124464	0.0228211	AAEL005951	lipid storage droplets surface binding protein [Source:VB Community Annotation]
LOC5575153	373.243	-1.04324	0.323168	-3.22815	0.00124592	0.0228211	AAEL000329
LOC5578232	312.95	-0.576341	0.17866	-3.22591	0.00125572	0.022969	AAEL019705
LOC5575179	465.647	-0.787325	0.244319	-3.22253	0.00127063	0.0232095	AAEL000304
LOC5576348	258.632	0.757672	0.235314	3.21984	0.00128263	0.0233815	AAEL002861
LOC110674755	31.0969	1.35512	0.420893	3.21963	0.00128357	0.0233815	AAEL027428
LOC5573238	5445.69	0.60508	0.188085	3.21706	0.00129514	0.0235597	AAEL010330	Succinate dehydrogenase [ubiquinone] iron-sulfur subunit, mitochondrial [Source:UniProtKB/TrEMBL;Acc:Q16TA7]
LOC5570924	775.639	0.477864	0.148561	3.21661	0.00129713	0.0235637	AAEL026751
LOC5579909	525.548	-2.81353	0.874945	-3.21566	0.00130143	0.023581	AAEL024627
LOC110681130	54.2827	0.898415	0.279415	3.21535	0.00130287	0.023581	AAEL020987
LOC5572902	245.171	-0.587183	0.182626	-3.21522	0.00130343	0.023581	AAEL019711
LOC5575745	58.6367	-0.903214	0.280982	-3.21449	0.00130675	0.0235881	AAEL012047
LOC5574619	108.495	0.713909	0.2221	3.21435	0.00130738	0.0235881	AAEL008693	Cation efflux protein/ zinc transporter [Source:UniProtKB/TrEMBL;Acc:A0A1S4FKH5]
LOC5573307	164.278	-0.648349	0.202189	-3.20665	0.00134291	0.0241961	AAEL010395	beat protein [Source:VB Community Annotation]
LOC5568052	37.6348	-1.38205	0.4311	-3.20586	0.00134658	0.0242293	AAEL006490	GPCR Calcitonin/Diuretic Hormone Family [Source:VB Community Annotation]	GPRCAL2
LOC5568525	646.741	-0.457362	0.142728	-3.20444	0.00135328	0.0243168	AAEL024980
LOC5571598	369.884	0.449795	0.140398	3.2037	0.00135673	0.024333	AAEL009183	cytochrome oxidase biogenesis protein (oxa1 mitochondrial) [Source:VB Community Annotation]
LOC5569003	3069.47	-3.66722	1.14477	-3.20346	0.00135785	0.024333	AAEL007305
LOC5571274	3371.75	-0.580595	0.181281	-3.20274	0.00136126	0.0243373	AAEL001570
LOC5566425	13.4532	-1.72627	0.539017	-3.20263	0.00136177	0.0243373	AAEL005379
LOC5571300	63.0156	-1.04817	0.327337	-3.2021	0.00136428	0.0243493	AAEL001543
LOC5574700	192.59	0.869046	0.271477	3.20117	0.00136869	0.0243951	AAEL022307
LOC5569772	373.341	0.456317	0.142593	3.20014	0.00137362	0.02445	AAEL007895	beta-1,4-galactosyltransferase [Source:VB Community Annotation]
LOC5573879	5851.05	0.801769	0.25074	3.19762	0.00138569	0.0246243	AAEL010801	Cytochrome b-c1 complex subunit 6 [Source:UniProtKB/TrEMBL;Acc:Q1HR18]
LOC5578994	318.578	0.66225	0.207127	3.19732	0.00138713	0.0246243	AAEL003801	28S ribosomal protein S5 [Source:VB Community Annotation]	mRpS5
LOC5568256	10.8061	2.65679	0.832686	3.19062	0.00141967	0.0251683	AAEL006691	fibrinogen and fibronectin [Source:VB Community Annotation]
LOC5567663	68.129	1.52628	0.478486	3.18981	0.00142368	0.0252056	AAEL006248	p37NB protein, putative [Source:VB Community Annotation]
LOC5573949	771.773	0.471679	0.148042	3.18611	0.00144201	0.0254844	AAEL002216	5-AMP-activated protein kinase, beta subunit [Source:VB Community Annotation]
LOC5572433	74.204	0.809483	0.254087	3.18585	0.00144328	0.0254844	AAEL001797	endopeptidase clp, putative [Source:VB Community Annotation]
LOC5576712	1635.2	3.38567	1.0639	3.18231	0.00146106	0.0257576	AAEL002949	Osiris, putative [Source:VB Community Annotation]
LOC110674467	16.1492	-3.17374	0.997519	-3.18163	0.00146447	0.0257576	AAEL027972
LOC5575211	39.591	1.07051	0.336468	3.18161	0.00146458	0.0257576	AAEL011677	AMP dependent coa ligase [Source:UniProtKB/TrEMBL;Acc:A0A1S4G2Y4]
LOC5573609	7988.65	0.792849	0.249286	3.18048	0.00147031	0.025824	AAEL002099	cuticle protein, putative [Source:VB Community Annotation]
LOC5572463	3237.74	-0.477862	0.150373	-3.17783	0.0014838	0.0260131	AAEL001798	protein tyrosine phosphatase prl [Source:VB Community Annotation]
LOC5577999	8290.89	0.6225	0.195903	3.1776	0.001485	0.0260131	AAEL003393	ATP synthase beta subunit [Source:VB Community Annotation]
LOC110679507	51.3784	-0.958801	0.301866	-3.17625	0.00149194	0.0261001	AAEL025552
LOC5568286	560.276	2.32414	0.731955	3.17525	0.00149709	0.0261557	AAEL006739	adult cuticle protein, putative [Source:VB Community Annotation]
LOC5570244	35720.5	-0.471976	0.148678	-3.1745	0.00150097	0.0261889	AAEL008188	60S ribosomal protein L6 [Source:UniProtKB/TrEMBL;Acc:Q16ZH3]	RpL6
LOC5579902	1570.88	-0.570928	0.179945	-3.1728	0.00150978	0.0262941	AAEL001044	tyrosyl-tRNA synthetase [Source:VB Community Annotation]	Aats-tyr
LOC5570960	116.263	0.702648	0.221476	3.17257	0.00151097	0.0262941	AAEL008692	barrier-to-autointegration factor, putative [Source:VB Community Annotation]
LOC5572696	7452.19	0.744221	0.234613	3.17211	0.00151333	0.0263006	AAEL009964
LOC5565724	20.0643	2.06542	0.6512	3.17171	0.00151544	0.0263027	AAEL004953	elongase, putative [Source:VB Community Annotation]
LOC5579485	768.292	0.554099	0.174811	3.16971	0.00152593	0.02645	AAEL011012	Septin [Source:UniProtKB/TrEMBL;Acc:A0A1S4FS27]
LOC5575378	14.2773	-1.65501	0.522235	-3.1691	0.00152912	0.0264708	AAEL018221
LOC110679405	7338.11	1.9284	0.609002	3.16649	0.00154292	0.0266747	AAEL027675
LOC5567882	3510.87	0.691795	0.218648	3.16396	0.00155636	0.0268721	AAEL006341
LOC110676862	2406.02	0.472079	0.149252	3.16297	0.00156167	0.0269286	AAEL007963
LOC110677165	23.4741	-1.5443	0.488421	-3.16183	0.00156783	0.0269961	AAEL026376
LOC5567066	197.03	1.00643	0.318341	3.16149	0.00156966	0.0269961	AAEL005803	Gastrin-releasing peptide receptor [Source:UniProtKB/TrEMBL;Acc:A0A411JKA4]
LOC110677747	2.66252	-4.86172	1.53807	-3.16092	0.00157273	NA	AAEL025691
LOC110678779	2.66252	-4.86172	1.53807	-3.16092	0.00157273	NA	AAEL023520
LOC5567531	663.679	0.633304	0.200426	3.15978	0.00157886	0.0271191	AAEL027977
LOC5570822	146.756	0.653786	0.206948	3.15918	0.00158216	0.0271232	AAEL008610	myosin vii [Source:VB Community Annotation]
LOC5572416	550.77	2.15815	0.683179	3.15899	0.00158319	0.0271232	AAEL009791	cuticle protein, putative [Source:VB Community Annotation]
LOC110677178	10.0448	2.8865	0.913855	3.15859	0.00158533	0.0271247	AAEL028146
LOC110674028	1639.88	-0.436687	0.138354	-3.1563	0.00159784	0.0273035	AAEL026232
LOC5567349	103.299	-0.809454	0.256556	-3.15507	0.00160458	0.0273834	AAEL006032
LOC110676624	2.6505	4.85232	1.53869	3.15353	0.00161309	NA	AAEL028192
LOC5579833	139.138	0.881688	0.279654	3.15278	0.00161722	0.0275636	AAEL005866	succinate dehydrogenase assembly factor 2, mitochondrial precursor (SDH assembly factor 2) [Source:VB Community Annotation]
LOC5566166	1495.76	0.354048	0.112438	3.14882	0.00163929	0.0279037	AAEL005221	internalin A, putative [Source:VB Community Annotation]
LOC5571819	202.405	-0.861104	0.27355	-3.14788	0.00164457	0.0279577	AAEL001687	adenylate cyclase [Source:VB Community Annotation]
LOC5573200	420.443	0.468577	0.148893	3.14708	0.00164911	0.0279871	AAEL001998
LOC5579210	13.4256	-1.60922	0.511379	-3.14683	0.00165053	0.0279871	AAEL027204
LOC5564316	187.117	-0.573639	0.182325	-3.14624	0.00165384	0.028006	AAEL000595	beat protein [Source:VB Community Annotation]
LOC23687710	799.826	0.535744	0.170315	3.1456	0.00165744	0.028006	AAEL017290	Coiled-coil domain-containing protein 72 homolog [Source:VB Community Annotation]
LOC5568377	225.24	0.928454	0.295168	3.14551	0.00165799	0.028006	AAEL021376
LOC5576452	2575.49	-0.976288	0.310432	-3.14493	0.00166124	0.0280252	AAEL012536
LOC5575506	149.57	-1.3494	0.429301	-3.14325	0.00167086	0.0281516	AAEL018228
LOC110679079	3646.35	1.68666	0.536792	3.14211	0.00167738	0.0282256	AAEL025584
LOC5565878	634.842	0.460296	0.146624	3.1393	0.00169354	0.0284404	AAEL000679	NEDD8, putative [Source:VB Community Annotation]
LOC5577415	444.944	-0.793335	0.252727	-3.13909	0.0016947	0.0284404	AAEL003162	formin 1,2/cappuccino [Source:VB Community Annotation]
LOC5564895	2507.23	0.365648	0.1165	3.13861	0.00169753	0.0284404	AAEL014642	E2 ubiquitin-conjugating enzyme, bendless [Source:VB Community Annotation]	ben
LOC5576880	247.696	-0.601652	0.191707	-3.1384	0.00169874	0.0284404	AAEL003036
LOC110674119	29.3072	1.63556	0.521543	3.136	0.00171266	0.0286374	AAEL026582
LOC5575642	1039.62	-0.519451	0.165663	-3.13559	0.0017151	0.0286419	AAEL011985
LOC5575828	1079.2	0.46721	0.149057	3.13443	0.00172188	0.02869	AAEL012095	26S protease regulatory subunit [Source:VB Community Annotation]
LOC5568740	1149.39	2.38843	0.762192	3.13363	0.00172658	0.02869
LOC110676375	54.6	-3.45013	1.10106	-3.13347	0.00172751	0.02869	AAEL019869
LOC5572198	1253.5	-0.67533	0.215532	-3.13331	0.00172845	0.02869	AAEL009615	ultraviolet wavelength sensitive opsin [Source:VB Community Annotation]	GPROP8
LOC5572128	4.03563	4.42043	1.41081	3.13325	0.00172881	0.02869	AAEL009528
LOC5566065	168.87	0.770306	0.245935	3.13215	0.00173533	0.0287391	AAEL005146
LOC110678104	502.933	1.31266	0.41911	3.13202	0.0017361	0.0287391	AAEL022932
LOC5569553	297.14	0.852056	0.272509	3.12671	0.00176775	0.0291966	AAEL007758
LOC5564066	751.286	-0.668299	0.213744	-3.12664	0.00176816	0.0291966	AAEL026169
LOC110679221	9.7301	-2.3322	0.746916	-3.12243	0.00179363	0.0295539	AAEL020061
LOC5574224	4044.06	-3.67579	1.17733	-3.12213	0.00179545	0.0295539	AAEL018207	C-Type lectin (CTL) [Source:VB Community Annotation]	CTL8
LOC5573851	2407.36	0.329535	0.105554	3.12196	0.00179649	0.0295539	AAEL010777	thioredoxin (TRX), putative [Source:VB Community Annotation]
LOC5568465	14357.3	-0.404488	0.129664	-3.11951	0.00181153	0.0297643	AAEL006860	40S ribosomal protein S28 [Source:UniProtKB/TrEMBL;Acc:Q1HR28]	RpS28
LOC5578370	265.822	-0.55838	0.179182	-3.11628	0.00183148	0.0300549	AAEL003536	E3 UFM1-protein ligase 1 homolog (EC 6.3.2.-) [Source:VB Community Annotation]
LOC5567167	1455.01	0.550629	0.176775	3.11485	0.00184037	0.0301585	AAEL005897	MICOS complex subunit [Source:UniProtKB/TrEMBL;Acc:Q1HQI8]
LOC5566485	10342.8	0.659584	0.211776	3.11454	0.00184235	0.0301585	AAEL005422	pyrroline-5-carboxylate dehydrogenase [Source:VB Community Annotation]
LOC110676899	2.61479	4.8372	1.55417	3.1124	0.00185575	NA	AAEL023612
LOC5578260	115.962	0.803893	0.258304	3.1122	0.00185698	0.0303605	AAEL014880
LOC5570817	743.78	-0.41434	0.133207	-3.11049	0.00186778	0.0304994	AAEL008591	zinc finger protein, putative [Source:VB Community Annotation]
LOC110679653	5.39555	3.31971	1.06739	3.11011	0.00187018	0.030501	AAEL028191
LOC5579960	1459.82	-0.435755	0.140214	-3.10778	0.00188496	0.0307043	AAEL023547
LOC5575437	297.034	0.556834	0.179289	3.1058	0.00189767	0.0308734	AAEL002651
LOC5571353	715.679	2.54196	0.81894	3.10397	0.00190943	0.0310265	AAEL008966
LOC5566168	851.499	-0.674229	0.217316	-3.10252	0.00191881	0.0311402	AAEL019784
LOC23687877	83.5542	-2.27137	0.732271	-3.10182	0.00192332	0.0311402	AAEL024934
LOC110674860	10201.9	0.761703	0.245568	3.1018	0.00192348	0.0311402	AAEL027311
LOC5571725	550.805	0.750425	0.242095	3.09971	0.0019371	0.0313223	AAEL021785
LOC5564921	45330.2	-0.407954	0.13172	-3.09712	0.00195411	0.031551	AAEL004500	eukaryotic translation elongation factor [Source:VB Community Annotation]
LOC5567639	849.956	-0.73595	0.237662	-3.09662	0.00195741	0.031551	AAEL006239	glycerol kinase [Source:VB Community Annotation]
LOC5573990	1893.96	0.680295	0.21972	3.09619	0.00196025	0.031551	AAEL010840
LOC5570016	603.465	-0.527436	0.170384	-3.09558	0.00196428	0.031551	AAEL000193	Histone-lysine N-methyltransferase [Source:UniProtKB/TrEMBL;Acc:Q17PZ6]
LOC5570598	790.577	0.804996	0.260049	3.09555	0.00196449	0.031551	AAEL023839
LOC5568998	584.323	0.425333	0.137409	3.09539	0.00196553	0.031551	AAEL025594
LOC5572781	263.209	-2.43154	0.786774	-3.09051	0.00199811	0.0319602	AAEL010050
LOC5571355	149.162	2.84363	0.920192	3.09026	0.0019998	0.0319602	AAEL008979
LOC110675610	218.833	0.94708	0.306483	3.09016	0.0020005	0.0319602	AAEL026008
LOC5572950	1384.36	0.479173	0.155066	3.09013	0.00200068	0.0319602	AAEL010178
LOC5567128	81.6275	-1.40721	0.455479	-3.0895	0.00200491	0.0319891	AAEL005888	DNA polymerase theta [Source:VB Community Annotation]
LOC5566286	46.0792	1.17523	0.380596	3.08786	0.00201604	0.0321281	AAEL000722
LOC110678469	1537.51	0.796943	0.258245	3.086	0.00202872	0.0322913	AAEL027771	Putative ubiquinone oxidoreductase ndufs8/23 kDa subunit [Source:UniProtKB/TrEMBL;Acc:A0A0N8ERX8]
LOC5569941	102.264	0.780159	0.253011	3.0835	0.00204582	0.0325244	AAEL008044
LOC5579251	24.4025	-1.37413	0.445813	-3.08231	0.00205401	0.0326154	AAEL022431
LOC5578840	88.4999	-0.90679	0.294275	-3.08144	0.00206003	0.0326719	AAEL019588
LOC5564472	4902.11	0.576327	0.187195	3.07875	0.00207874	0.0329291	AAEL020804
LOC5566397	386.437	-0.466165	0.151531	-3.07637	0.00209538	0.0331531	AAEL005368
LOC5579950	1225.46	-0.554278	0.180227	-3.07545	0.00210188	0.0332163	AAEL006791	rab6 GTPase activating protein, gapcena (rabgap1 protein) [Source:VB Community Annotation]
LOC5570211	72.1197	1.56414	0.508783	3.07428	0.00211012	0.0333067	AAEL019828
LOC5574832	103.19	-0.729996	0.237555	-3.07295	0.00211952	0.0334152	AAEL011435	radical sam proteins [Source:VB Community Annotation]
LOC5572650	2092.79	0.712484	0.231957	3.07162	0.00212898	0.0335244	AAEL001865
LOC5565357	1308.08	1.44048	0.46903	3.07119	0.00213206	0.0335331	AAEL004760	pupal cuticle protein, putative [Source:VB Community Annotation]
LOC5567584	199.153	-0.756127	0.246337	-3.06948	0.00214429	0.0336126	AAEL006176	odorant binding protein OBP27 [Source:VB Community Annotation]	OBP27
LOC110675515	30.626	1.32417	0.431408	3.06942	0.00214473	0.0336126	AAEL026079
LOC110681454	30.626	1.32417	0.431408	3.06942	0.00214473	0.0336126	AAEL023043
LOC5577630	6583.63	0.83628	0.272545	3.06841	0.00215203	0.0336626	AAEL003234	cytochrome c oxidase, subunit VIA, putative [Source:VB Community Annotation]
LOC5579195	186.975	-0.697702	0.227434	-3.06772	0.00215701	0.0336626	AAEL020488
LOC5570313	2040.31	-0.649525	0.211733	-3.06765	0.00215746	0.0336626	AAEL008248	Eukaryotic translation initiation factor 2A [Source:UniProtKB/TrEMBL;Acc:A0A1S4FJ71]
LOC110680267	144.523	0.679237	0.221433	3.06746	0.00215889	0.0336626	AAEL027000
LOC110680232	79.7882	-0.795837	0.259466	-3.06722	0.00216063	0.0336626	AAEL027987
LOC5575974	93.0477	-0.719541	0.234649	-3.06646	0.00216609	0.0336813	AAEL012229
LOC5564166	106.592	1.39362	0.454487	3.06635	0.00216692	0.0336813	AAEL004126	sterol desaturase [Source:VB Community Annotation]
LOC5571430	56.2552	0.83258	0.271582	3.06567	0.00217185	0.0337185	AAEL009058
LOC5576043	242.546	0.48909	0.159559	3.06525	0.00217487	0.0337258	AAEL012278	metalloprotease [Source:VB Community Annotation]
LOC110676559	2.56102	-4.81935	1.57231	-3.06513	0.00217573	NA	AAEL025194
LOC5576003	206.241	0.535883	0.174879	3.06431	0.00218175	0.0337929	AAEL025078
LOC5576483	180.025	0.982984	0.320969	3.06255	0.00219462	0.0339395	AAEL002898
LOC5571889	78.701	0.800226	0.261314	3.06231	0.00219634	0.0339395	AAEL009379	mitochondrial ribosomal protein, L33, putative [Source:VB Community Annotation]	mRpL33
LOC110675376	42.7425	-1.09704	0.358326	-3.06156	0.00220185	0.0339849	AAEL024628
LOC5579028	762.396	-0.382178	0.124858	-3.06091	0.00220665	0.0340194	AAEL013963	tumor necrosis factor induced protein [Source:VB Community Annotation]
LOC110677062	7951.13	0.826239	0.269966	3.06053	0.00220945	0.034023	AAEL025608	Putative cuticle protein [Source:UniProtKB/TrEMBL;Acc:A0A0P6IXJ4]
LOC5572412	680.19	2.36669	0.773624	3.05923	0.00221906	0.0341312	AAEL009784	cuticle protein, putative [Source:VB Community Annotation]
LOC5576763	115.658	-1.59107	0.520249	-3.05829	0.00222602	0.0341986	AAEL012748
LOC5573094	11.255	-2.91714	0.954012	-3.05776	0.00222997	0.0342197	AAEL010286	leucine-rich transmembrane protein [Source:VB Community Annotation]
LOC5576996	16.447	1.63374	0.534385	3.05724	0.00223382	0.034239	AAEL003056	brain chitinase and chia [Source:VB Community Annotation]
LOC5573859	630.723	-2.23941	0.732605	-3.05678	0.00223728	0.0342524	AAEL010780	carboxypeptidase [Source:VB Community Annotation]
LOC5579488	154.307	0.732705	0.239779	3.05575	0.00224496	0.0343302	AAEL007315	symbol, putative [Source:VB Community Annotation]
LOC5569635	2.77905	4.92468	1.61198	3.05505	0.0022502	NA	AAEL007776
LOC5578252	6.36146	-2.7756	0.908574	-3.05489	0.00225142	0.0343893	AAEL019978
LOC5574348	821.966	0.764455	0.250286	3.05433	0.00225564	0.0344141	AAEL002350
LOC5570779	126.644	0.582941	0.190944	3.05294	0.00226609	0.0345338	AAEL008553
LOC110674152	17.2445	1.67521	0.548871	3.0521	0.00227246	0.0345909	AAEL020330
LOC5569051	69.2853	-1.45238	0.476071	-3.05076	0.00228263	0.0347059	AAEL019744
LOC23687838	120.459	-0.648671	0.212673	-3.05008	0.0022878	0.0347447	AAEL017418
LOC110680473	68.3729	-0.9728	0.319001	-3.04952	0.00229207	0.0347696	AAEL020891
LOC5572050	24.2844	-1.17103	0.384131	-3.04852	0.00229975	0.0348462	AAEL000255
LOC5575696	1596.77	0.441919	0.144984	3.04805	0.00230329	0.03486	AAEL012010	Conserved insect protein (Fragment) [Source:UniProtKB/TrEMBL;Acc:Q1HQL4]
LOC110676683	60.8188	-0.830313	0.272553	-3.04643	0.00231579	0.0350092	AAEL021911
LOC5578805	224.591	-0.740267	0.243082	-3.04533	0.00232424	0.0350871	AAEL013846
LOC5566220	333.01	0.914194	0.300221	3.04507	0.00232625	0.0350871	AAEL005270
LOC110674291	52.4931	0.850657	0.279441	3.04413	0.00233351	0.0351565	AAEL022820
LOC110680903	68.1194	3.40134	1.11752	3.04364	0.00233733	0.0351709	AAEL020993
LOC23687488	17.7567	-1.37719	0.452527	-3.04333	0.00233977	0.0351709	AAEL027822
LOC5573423	1367.92	-1.33317	0.438228	-3.0422	0.00234859	0.0352635	AAEL026706
LOC5564174	27.2506	-1.16352	0.382803	-3.03947	0.00236998	0.0355444	AAEL013042
LOC5575669	2044.04	1.00646	0.331271	3.03818	0.00238012	0.035656	AAEL002688	glucosyl/glucuronosyl transferases [Source:VB Community Annotation]
LOC5578904	148.431	0.576823	0.190059	3.03497	0.00240556	0.0359964	AAEL013907	d-alanyl-d-alanine carboxypeptidase [Source:VB Community Annotation]
LOC5565917	13.149	-1.78929	0.589667	-3.03441	0.00241006	0.0360231	AAEL000698
LOC110677252	27.0734	1.17008	0.385707	3.03361	0.0024165	0.0360786	AAEL021895
LOC5572504	78.3681	0.787537	0.259697	3.03252	0.00242518	0.0361407	AAEL009833	mitochondrial ribosomal protein, L46, putative [Source:VB Community Annotation]	mRpL46
LOC5568064	32.6182	-1.41898	0.467937	-3.03241	0.00242612	0.0361407	AAEL019807
LOC5575166	272.684	-0.577825	0.190583	-3.03187	0.00243041	0.0361639	AAEL000315	pigeon protein (linotte protein) [Source:VB Community Annotation]
LOC5566464	120.441	0.747536	0.24668	3.03038	0.00244245	0.0363023	AAEL005415	Ferrochelatase [Source:UniProtKB/TrEMBL;Acc:Q17A56]
LOC5567056	1138.93	1.5145	0.499899	3.02961	0.00244869	0.0363543	AAEL005775	cytochrome P450 [Source:VB Community Annotation]	CYP325R1
LOC5568297	63.8806	-1.14885	0.379359	-3.02839	0.00245859	0.0364603	AAEL006726	Innexin [Source:UniProtKB/TrEMBL;Acc:Q174Z8]	inx4
LOC110679073	2.53028	-4.7844	1.57989	-3.02831	0.00245924	NA	AAEL024603
LOC5565373	104.197	1.46563	0.484135	3.02732	0.00246735	0.0365494	AAEL004745	pupal cuticle protein, putative [Source:VB Community Annotation]
LOC23687404	14947	0.943175	0.311642	3.02647	0.00247429	0.0366021	AAEL016984	Glyceraldehyde-3-phosphate dehydrogenase [Source:UniProtKB/TrEMBL;Acc:J9HYM2]
LOC5570705	267.38	-0.558695	0.184619	-3.02621	0.00247644	0.0366021	AAEL001442	map-kinase activating death domain protein (madd)/denn/aex-3(c.elegans) [Source:VB Community Annotation]
LOC5565213	108.645	-1.03679	0.34292	-3.02343	0.00249928	0.0368701	AAEL020586
LOC5568885	12.5504	1.83296	0.606274	3.02332	0.00250014	0.0368701	AAEL007192	pupal cuticle protein, putative [Source:VB Community Annotation]
LOC5573633	846.25	-5.68697	1.88209	-3.02163	0.00251422	0.0370149	AAEL010624	Osiris, putative [Source:VB Community Annotation]
LOC110679265	59.8081	-0.886246	0.293317	-3.02146	0.00251555	0.0370149	AAEL027406
LOC5575988	586.766	-0.705636	0.233763	-3.01859	0.00253953	0.0373264	AAEL002769	homeobox protein prospero/prox-1 [Source:VB Community Annotation]
LOC5573248	38.9869	-1.08091	0.35815	-3.01804	0.00254412	0.0373523	AAEL010342	racGTPase-activating protein [Source:VB Community Annotation]
LOC5568113	436.836	0.598753	0.198459	3.01702	0.00255274	0.0374374	AAEL006557
LOC5570311	468.498	-0.40249	0.133431	-3.01647	0.00255737	0.0374638	AAEL008242	hook protein [Source:VB Community Annotation]
LOC5575111	96.3822	-0.739899	0.245335	-3.01588	0.00256237	0.0374956	AAEL011658	plasma glutamate carboxypeptidase [Source:VB Community Annotation]
LOC5565073	349.976	-1.5311	0.507928	-3.0144	0.00257488	0.037637	AAEL004582	beta-galactosidase [Source:VB Community Annotation]
LOC5578064	79.7036	-1.06607	0.353709	-3.01398	0.00257849	0.0376482	AAEL013501	prophenoloxidase [Source:VB Community Annotation]	PPO4
LOC5565838	29.6295	-1.32078	0.438597	-3.01137	0.00260074	0.0379152	AAEL005044
LOC5565900	495.023	-0.761964	0.253046	-3.01116	0.0026025	0.0379152	AAEL000716	chondroitin 4-sulfotransferase [Source:VB Community Annotation]
LOC5570525	85.6818	-2.55039	0.847526	-3.00922	0.00261917	0.0381161	AAEL001435	spaetzle-like cytokine [Source:VB Community Annotation]	SPZ2
LOC5567857	983.561	0.438372	0.145719	3.00833	0.00262689	0.0381865	AAEL006315	26S proteasome regulatory subunit rpn1 [Source:VB Community Annotation]
LOC5572672	825.934	0.491938	0.163611	3.00675	0.00264059	0.0383436	AAEL001852
LOC5568348	164.113	-1.02707	0.341634	-3.00633	0.00264422	0.0383542	AAEL001062
LOC5574473	8.35212	-2.20043	0.732398	-3.00442	0.00266091	0.0385428	AAEL002394
LOC5567539	1158.53	-1.13035	0.376259	-3.00417	0.00266304	0.0385428	AAEL006154
LOC5572192	116.147	0.699452	0.23307	3.00104	0.00269063	0.0388591	AAEL009608	28S ribosomal protein S16, mitochondrial [Source:VB Community Annotation]	mRpS16
LOC5573434	50.1685	0.85467	0.284793	3.00102	0.00269077	0.0388591	AAEL010476	sil1 [Source:VB Community Annotation]
LOC5565646	10.1682	2.27707	0.758982	3.00017	0.00269831	0.0389257	AAEL004899
LOC110675257	218.098	-0.642016	0.214052	-2.99934	0.00270562	0.0389886	AAEL025410
LOC5566978	373.038	0.471408	0.157296	2.99696	0.0027269	0.0392108	AAEL005730	cop9 signalosome complex subunit [Source:VB Community Annotation]
LOC5566313	111.378	-1.02144	0.340827	-2.99695	0.00272696	0.0392108	AAEL024012
LOC5570827	623.451	0.618498	0.206411	2.99645	0.00273147	0.0392331	AAEL008601	39S mitochondrial ribosomal protein L28 [Source:UniProtKB/TrEMBL;Acc:Q1HQI0]	mRpL28
LOC5572102	36.1738	-1.00872	0.336816	-2.99487	0.00274564	0.0393815	AAEL009515
LOC5571124	363.339	1.04792	0.349934	2.99463	0.00274775	0.0393815	AAEL021581
LOC5577480	102.664	0.707054	0.236221	2.99319	0.00276079	0.0395255	AAEL024613
LOC5568462	239.687	-0.630444	0.210678	-2.99245	0.00276748	0.0395657	AAEL019879
LOC5576472	1273.16	0.429822	0.143647	2.99222	0.00276957	0.0395657	AAEL002886	thioredoxin reductase [Source:VB Community Annotation]
LOC5577368	563.573	-0.395355	0.13219	-2.99081	0.00278241	0.0397063	AAEL000461
LOC5566975	101.187	0.636761	0.212954	2.99014	0.0027885	0.0397504	AAEL005732	acyl-coa dehydrogenase [Source:VB Community Annotation]
LOC5568808	157.554	0.641479	0.21457	2.9896	0.0027934	0.0397773	AAEL001166	protein phosphatases pp1 regulatory subunit [Source:VB Community Annotation]
LOC5573809	45.879	-3.37108	1.12785	-2.98895	0.00279938	0.0398198	AAEL022306
LOC110675726	536.691	-1.09381	0.366102	-2.98772	0.00281063	0.0399369	AAEL025917
LOC5573435	515.911	-0.690357	0.231099	-2.98728	0.00281469	0.0399516	AAEL025393
LOC5576725	264.818	-1.12414	0.376453	-2.98613	0.00282535	0.04006	AAEL002964	brain chitinase and chia [Source:VB Community Annotation]
LOC5576133	99.08	0.764454	0.256068	2.98536	0.00283243	0.0401175	AAEL002812
LOC5571316	324.314	-0.514961	0.172587	-2.98377	0.0028472	0.0402589	AAEL008940	chaoptin [Source:VB Community Annotation]
LOC5564804	1037.31	1.64014	0.549738	2.98349	0.00284981	0.0402589	AAEL014627	short-chain dehydrogenase [Source:VB Community Annotation]
LOC110679157	128.523	0.797568	0.267363	2.98309	0.00285352	0.0402589	AAEL021191
LOC5573345	100.439	-3.07643	1.03143	-2.9827	0.00285723	0.0402589	AAEL010435
LOC110679182	38.5485	1.17669	0.394512	2.98265	0.00285761	0.0402589	AAEL020361
LOC5578659	2757.69	-1.2403	0.415958	-2.98179	0.00286571	0.0402606	AAEL013808	fascin [Source:VB Community Annotation]
LOC5577011	135.809	0.621612	0.208488	2.98153	0.0028681	0.0402606	AAEL012924	mitochondrial ribosomal protein, S24, putative [Source:VB Community Annotation]	mRpS24
LOC5579401	19.8416	1.9256	0.645869	2.98141	0.00286921	0.0402606	AAEL015477
LOC5568837	1092.96	0.749522	0.251404	2.98134	0.00286989	0.0402606	AAEL001184
LOC110677897	759.376	-0.556171	0.186604	-2.98049	0.00287789	0.040329	AAEL025502
LOC5570225	103.657	0.985947	0.330835	2.98017	0.00288086	0.040329	AAEL008175	mitochondrial ribosomal protein, L44, putative [Source:VB Community Annotation]	mRpL44
LOC5564474	278.846	0.640427	0.215234	2.97549	0.00292517	0.040906	AAEL021584
LOC5578909	203.726	1.47391	0.495595	2.97402	0.00293923	0.0410593	AAEL026746
LOC5571658	20.4133	-1.32819	0.446703	-2.97332	0.00294599	0.0411104	AAEL001666
LOC5563960	1285.41	0.375615	0.126391	2.97185	0.00296011	0.0412639	AAEL004010	splicing factor, putative [Source:VB Community Annotation]
LOC5575910	1326.15	-0.710835	0.239282	-2.9707	0.0029712	0.0413749	AAEL012154	2,3-cyclic-nucleotide 2-phosphodiesterase [Source:VB Community Annotation]
LOC5578966	310.463	-0.472607	0.159202	-2.9686	0.00299157	0.0416149	AAEL013950	DEAD box ATP-dependent RNA helicase [Source:VB Community Annotation]
LOC5568965	76.0563	-0.794248	0.267614	-2.96789	0.00299851	0.0416677	AAEL007253
LOC5568075	218.394	0.55855	0.188342	2.96562	0.00302074	0.0419326	AAEL006526	neurotransmitter gated ion channel [Source:VB Community Annotation]
LOC5575783	117.486	-0.592884	0.199943	-2.96527	0.00302416	0.041936	AAEL019805
LOC5576438	449.87	1.40118	0.472663	2.96443	0.00303242	0.0420066	AAEL012526
LOC5578298	190.356	-0.6101	0.205883	-2.96333	0.00304331	0.0421134	AAEL013617	chimerin (rho- GTPase-activating protein) [Source:VB Community Annotation]
LOC5568315	81.7659	0.934873	0.315717	2.96111	0.00306529	0.0423591	AAEL006754
LOC5573252	108.993	0.701887	0.237061	2.96079	0.00306853	0.0423591	AAEL010339
LOC110675366	97.0319	0.791387	0.267329	2.96035	0.00307289	0.0423591	AAEL027779
LOC5576130	84.0016	-1.62424	0.54871	-2.96011	0.00307526	0.0423591	AAEL002773
LOC5571134	726.786	0.721073	0.243611	2.95993	0.00307705	0.0423591	AAEL008831
LOC5564604	880.404	-0.355252	0.120093	-2.95815	0.00309493	0.0425609	AAEL014529
LOC110676223	91.8297	-0.794088	0.268583	-2.95658	0.00311071	0.0427335	AAEL027472
LOC5574328	1385.09	-0.766156	0.259274	-2.955	0.00312667	0.0429083	AAEL019424
LOC110681353	69.1944	0.750848	0.25425	2.95318	0.00314515	0.0430726	AAEL024180	39S mitochondrial ribosomal protein L17 [Source:UniProtKB/TrEMBL;Acc:Q17FI8]
LOC5578023	69.1944	0.750848	0.25425	2.95318	0.00314515	0.0430726	AAEL024180	39S mitochondrial ribosomal protein L17 [Source:UniProtKB/TrEMBL;Acc:Q17FI8]
LOC5569483	23.9426	-1.24854	0.422912	-2.95224	0.00315474	0.043144	AAEL007667
LOC5574992	300.208	0.592611	0.200747	2.95203	0.00315688	0.043144	AAEL002538	glutamate receptor, ionotropic kainate 1, 2, 3 (glur5, glur6, glur7) [Source:VB Community Annotation]
LOC5575338	25.4598	1.36849	0.463924	2.94981	0.00317974	0.0433405	AAEL002615	Leucine-rich transmembrane protein [Source:UniProtKB/TrEMBL;Acc:A0A1S4F2H8]
LOC110680203	29.3107	1.27223	0.431325	2.94959	0.00318196	0.0433405	AAEL025768
LOC5568724	614.055	0.62194	0.210864	2.94948	0.00318308	0.0433405	AAEL007080	glycerol-3-phosphate acyltransferase [Source:VB Community Annotation]
LOC110675834	8.83644	2.08613	0.707446	2.94882	0.00318989	0.0433405	AAEL020052
LOC110676805	8.83644	2.08613	0.707446	2.94882	0.00318989	0.0433405	AAEL026561
LOC5565883	288.72	-0.896142	0.303909	-2.94872	0.00319089	0.0433405	AAEL019474
LOC5577134	15.5144	-2.52235	0.855556	-2.9482	0.00319634	0.04337	AAEL013031
LOC5565381	163.103	1.63012	0.553285	2.94625	0.00321648	0.0435986	AAEL019993
LOC5576595	49.1205	1.13723	0.386202	2.94465	0.00323323	0.0437808	AAEL002948	frataxin, putative [Source:VB Community Annotation]
LOC5577559	184.531	0.794269	0.269819	2.94371	0.003243	0.0438682	AAEL020960	Carboxypeptidase A [Source:UniProtKB/TrEMBL;Acc:Q6J6D9]
LOC5577028	75.7724	-0.675529	0.229607	-2.94211	0.0032598	0.044006	AAEL012952
LOC5571153	541.278	0.609559	0.207184	2.94211	0.00325983	0.044006	AAEL008849	selenophosphate synthase [Source:VB Community Annotation]
LOC110677761	92.6204	0.715912	0.24359	2.939	0.00329269	0.0444044	AAEL026672	C2H2-type Zn-finger protein [Source:UniProtKB/TrEMBL;Acc:Q1HRG5]
LOC5570465	7935.21	-0.486088	0.165451	-2.93795	0.00330385	0.0444757	AAEL026904
LOC110676204	23.0645	1.79434	0.610759	2.93788	0.00330469	0.0444757	AAEL026959
LOC5570605	78.9097	-1.12594	0.383346	-2.93715	0.00331247	0.044535	AAEL027597
LOC5571937	6457.54	-0.35206	0.119899	-2.93631	0.00332141	0.0445687	AAEL009422
LOC110680234	20.0816	-1.63332	0.556275	-2.93618	0.00332278	0.0445687	AAEL026780
LOC5565810	343.461	-0.657352	0.223896	-2.93597	0.00332506	0.0445687	AAEL005002	roundabout [Source:VB Community Annotation]
LOC5576654	356.123	-0.655109	0.223248	-2.93444	0.00334149	0.0447435	AAEL012685
LOC5577639	396.494	-0.583309	0.198876	-2.93303	0.00335668	0.0449015	AAEL003211	beta-carotene dioxygenase [Source:VB Community Annotation]
LOC5568338	8.29635	-2.01141	0.686217	-2.93116	0.00337699	0.0451237	AAEL001060
LOC5577478	24079.4	-0.474716	0.161971	-2.93087	0.0033801	0.0451237	AAEL013221	60S ribosomal protein L10a [Source:VB Community Annotation]	RpL10a
LOC5569610	28.9811	1.64572	0.561598	2.93043	0.00338491	0.0451424	AAEL001256
LOC5564563	198.795	-0.62447	0.213173	-2.9294	0.00339621	0.0452475	AAEL014510	Sprouty [Source:UniProtKB/TrEMBL;Acc:A0A1S4G215]
LOC5570040	268.173	1.59002	0.542851	2.92901	0.00340043	0.0452581	AAEL000200
LOC5573239	83.7499	-0.80328	0.274295	-2.92853	0.00340573	0.0452832	AAEL010332
LOC5573489	2660.98	0.562375	0.192149	2.92676	0.00342511	0.0454952	AAEL014505	succinate dehydrogenase, putative [Source:VB Community Annotation]
LOC5571216	2590.8	0.458714	0.156795	2.92557	0.00343822	0.0455979	AAEL021756
LOC110678034	14.4567	1.48776	0.508559	2.92544	0.00343973	0.0455979	AAEL026070
LOC5571907	2429.1	0.621115	0.212381	2.92453	0.00344972	0.0456846	AAEL009414	NADH-ubiquinone oxidoreductase 39 kda subunit [Source:VB Community Annotation]
LOC5570832	90.982	-0.830381	0.284101	-2.92284	0.00346857	0.0458381	AAEL008595	Protein maelstrom homolog [Source:UniProtKB/Swiss-Prot;Acc:Q16YA8]	mael
LOC5572889	147.599	0.68715	0.235115	2.92262	0.00347103	0.0458381	AAEL010112
LOC5573118	100.152	0.732539	0.25067	2.92232	0.00347434	0.0458381	AAEL020031
LOC5565745	263.584	-0.573335	0.196197	-2.92225	0.00347516	0.0458381	AAEL019832
LOC110675413	2.5165	-4.79818	1.6424	-2.92145	0.00348409	NA	AAEL025767
LOC110674390	103.384	0.7107	0.243434	2.91947	0.00350622	0.046166	AAEL026769
LOC5573763	2180.74	-0.353391	0.121049	-2.91941	0.00350698	0.046166	AAEL000269
LOC5571233	870.979	0.526173	0.180299	2.91833	0.00351913	0.0462799	AAEL021200
LOC5571384	208.474	-0.621875	0.213156	-2.91746	0.0035289	0.0463623	AAEL020950
LOC5565125	116.085	0.896806	0.307494	2.9165	0.00353986	0.0464259	AAEL002343	neuronal pas domain protein [Source:VB Community Annotation]
LOC5572214	191.227	1.09261	0.374653	2.91632	0.00354183	0.0464259	AAEL009632	short-chain dehydrogenase [Source:VB Community Annotation]
LOC5564549	118.806	0.633818	0.217351	2.91611	0.00354425	0.0464259	AAEL004317
LOC5574277	1901.25	1.72537	0.591952	2.91472	0.00356007	0.0465451	AAEL011042
LOC110679012	272.804	-0.46833	0.160679	-2.91469	0.00356039	0.0465451	AAEL019660
LOC5579021	2957.7	0.699723	0.240117	2.91409	0.00356726	0.046589	AAEL013960
LOC5577711	18.3996	1.58376	0.5436	2.91346	0.00357446	0.0466371	AAEL013346	lethal(2)essential for life protein, l2efl [Source:VB Community Annotation]
LOC5564255	828.255	-0.733265	0.251722	-2.913	0.00357978	0.0466604	AAEL004193	rhophilin [Source:VB Community Annotation]
LOC5567371	47.6746	0.870585	0.298908	2.91255	0.00358489	0.0466811	AAEL006033	Dihydroorotate dehydrogenase (quinone), mitochondrial [Source:UniProtKB/TrEMBL;Acc:Q177S6]
LOC5578507	10.4361	-4.96882	1.70798	-2.90919	0.00362369	0.04714	AAEL013715	trypsin [Source:VB Community Annotation]
LOC5564140	1024.95	-0.390641	0.134324	-2.9082	0.00363517	0.0472429	AAEL004083	WD-repeat protein [Source:VB Community Annotation]
LOC5563718	355.684	-3.00665	1.03438	-2.90673	0.00365226	0.0474185	AAEL003905	alkaline phosphatase [Source:VB Community Annotation]
LOC5572725	42074.7	-0.466683	0.16063	-2.90532	0.00366873	0.0475443	AAEL009994	60S ribosomal protein L4 [Source:UniProtKB/TrEMBL;Acc:Q1HQJ0]	RpL4
LOC5564259	408000	0.379291	0.130552	2.90529	0.00366913	0.0475443	AAEL022285
LOC5567386	218.4	0.587348	0.202211	2.90464	0.00367681	0.0475972	AAEL026382
LOC5566059	4466.34	0.76059	0.261915	2.90395	0.00368483	0.0476545	AAEL005143	ubiquinone binding protein, putative [Source:VB Community Annotation]
LOC5575335	474.187	-0.388941	0.133986	-2.90284	0.00369791	0.047777	AAEL026381
LOC5569609	240.765	2.18049	0.751894	2.9	0.00373165	0.0481659	AAEL001248
LOC5576221	3182.14	0.602479	0.207806	2.89923	0.00374079	0.0482369	AAEL002833	cathepsin l [Source:VB Community Annotation]
LOC5564120	123.701	-0.954145	0.329204	-2.89834	0.00375148	0.0483277	AAEL019570
LOC5568272	261.834	0.783328	0.270327	2.89771	0.00375903	0.0483778	AAEL006705
LOC5569738	6335.88	0.688858	0.237752	2.89738	0.00376292	0.048381	AAEL007868	ubiquinol-cytochrome c reductase complex 14 kd protein [Source:VB Community Annotation]
LOC5574439	167.805	0.51048	0.176305	2.89543	0.0037864	0.048631	AAEL011156
LOC5578148	430.033	-0.411571	0.142159	-2.89515	0.00378971	0.048631	AAEL013541	syntaxin [Source:VB Community Annotation]
LOC5571086	680.273	0.716491	0.247568	2.89412	0.00380229	0.0487451	AAEL026403
LOC110676981	169.548	-0.561419	0.194055	-2.89309	0.00381475	0.0488576	AAEL020186
LOC5569049	1253.88	0.917376	0.317192	2.89218	0.00382584	0.0489523	AAEL007342
LOC5574491	648.63	-0.453845	0.156945	-2.89174	0.00383117	0.0489732	AAEL023701
LOC5572918	17.3203	-1.73324	0.599758	-2.8899	0.00385362	0.0492126	AAEL010139	serine protease, putative [Source:VB Community Annotation]
LOC5578506	6.70575	-4.27644	1.48011	-2.88927	0.00386136	0.0492132	AAEL023729
LOC5580161	264.916	0.542318	0.187719	2.889	0.00386475	0.0492132	AAEL011391	mitochondrial ribosomal protein, S9, putative [Source:VB Community Annotation]	mRpS9
LOC5565987	95.9326	-0.751427	0.260122	-2.88875	0.00386782	0.0492132	AAEL019467
LOC5565921	7023.05	0.763511	0.264311	2.88869	0.00386853	0.0492132	AAEL000703	glycogen phosphorylase [Source:VB Community Annotation]
LOC5567163	25199.8	-0.444725	0.154011	-2.88762	0.00388168	0.0493068	AAEL005901	40S ribosomal protein S3a [Source:UniProtKB/Swiss-Prot;Acc:Q1HRR3]	RpS3a
LOC5571014	516.802	0.506942	0.175565	2.88749	0.00388334	0.0493068	AAEL021211
LOC5575668	1024.67	0.73109	0.253378	2.88537	0.00390948	0.049576	AAEL002687	sterol carrier protein-2, putative [Source:VB Community Annotation]
LOC5574515	6395.07	-0.412908	0.143141	-2.88462	0.00391893	0.049576	AAEL019717	Mitochondrial phosphate carrier protein [Source:UniProtKB/TrEMBL;Acc:Q1HQX9]
LOC5574731	1582.87	-0.972862	0.337261	-2.8846	0.00391914	0.049576	AAEL011371
LOC5563879	499.789	0.440735	0.152793	2.88453	0.00391997	0.049576	AAEL014201	chaperone protein, putative [Source:VB Community Annotation]
LOC5573886	45.5741	-0.898381	0.311476	-2.88427	0.00392325	0.049576	AAEL010804	calcium/calmodulin-dependent protein kinase kinase [Source:VB Community Annotation]
LOC5570385	9990.41	1.05071	0.364376	2.88359	0.00393173	0.0496357	AAEL008285	pupal cuticle protein, putative [Source:VB Community Annotation]
LOC5576537	1745.99	-0.631582	0.219157	-2.88187	0.00395326	0.04986	AAEL024887
LOC110681520	610.316	0.614069	0.213128	2.88122	0.00396134	0.0499143	AAEL021734
LOC110677785	34.3528	3.01906	1.04807	2.8806	0.00396919	0.0499657	AAEL008173
LOC5571186	1667.76	0.304238	0.105645	2.87981	0.0039791	0.0500429	AAEL029013
LOC5574180	142.967	0.550308	0.191303	2.87663	0.00401944	0.0505023	AAEL002304	porphobilinogen synthase [Source:VB Community Annotation]
LOC5580237	584.825	0.541725	0.188406	2.8753	0.00403643	0.0506678	AAEL012323	MSF1 protein, putative [Source:VB Community Annotation]
LOC110678425	4.7743	3.14604	1.09508	2.87289	0.00406736	0.0509426	AAEL021526
LOC5565541	1963.79	0.602449	0.209705	2.87284	0.00406801	0.0509426	AAEL004829	NADH dehydrogenase, putative [Source:VB Community Annotation]
LOC23687462	256.164	0.739702	0.257494	2.8727	0.00406987	0.0509426	AAEL017042
LOC5579655	27.4701	-1.04225	0.362989	-2.8713	0.00408786	0.0511042	AAEL003956	amino acid transporter [Source:VB Community Annotation]
LOC110676328	30.8171	-2.20444	0.767805	-2.8711	0.0040905	0.0511042	AAEL026874
LOC110677042	10.0551	1.75695	0.612271	2.86957	0.00411032	0.0513034	AAEL025373
LOC5566631	298.648	1.00109	0.348946	2.86889	0.00411915	0.0513653	AAEL021888
LOC5568336	632.006	-0.372775	0.13007	-2.86596	0.00415744	0.051794	AAEL001433	fgf receptor activating protein [Source:VB Community Annotation]
LOC5573895	227.517	-1.27548	0.445177	-2.86512	0.00416852	0.0518832	AAEL002215
LOC5575971	139.363	0.706069	0.246563	2.86365	0.00418792	0.0520336	AAEL012218	mitochondria associated granulocyte macrophage csf signaling molecule [Source:VB Community Annotation]
LOC110679144	5.27891	-3.2898	1.14884	-2.86358	0.00418881	0.0520336	AAEL022864
LOC110678210	15.0228	2.85247	0.996213	2.86331	0.0041924	0.0520336	AAEL022230
LOC23687535	6.44953	-3.62093	1.26509	-2.86219	0.00420724	0.0521689	AAEL017115
LOC5577598	26.0795	1.75654	0.6139	2.86128	0.0042194	0.0522708	AAEL003232
LOC110677175	674.129	-0.769074	0.268884	-2.86025	0.00423312	0.0523918	AAEL021359
LOC5565382	624.976	1.35085	0.472527	2.85877	0.00425292	0.0525751	AAEL004764	pupal cuticle protein, putative [Source:VB Community Annotation]
LOC5568367	327.021	0.641809	0.224523	2.85855	0.00425587	0.0525751	AAEL001092	udp-glucose pyrophosphatase [Source:VB Community Annotation]
LOC5564417	87.9608	-0.796294	0.278836	-2.85578	0.00429315	0.0529863	AAEL014425
LOC5565249	483.939	0.404282	0.141602	2.85505	0.00430295	0.0530577	AAEL014771
LOC5577113	13179.5	0.62934	0.220537	2.85367	0.00432173	0.0531934	AAEL008697	cytochrome c oxidase, subunit VB, putative [Source:VB Community Annotation]
LOC5580158	865.166	-0.426591	0.149489	-2.85365	0.00432199	0.0531934	AAEL019509
LOC5565726	1797.07	0.712484	0.249722	2.85311	0.00432937	0.0532079	AAEL004951
LOC5574178	1621.59	-0.531582	0.186326	-2.85298	0.0043312	0.0532079	AAEL019806
LOC5580253	186.228	-0.804656	0.282175	-2.85162	0.00434971	0.0533857	AAEL012547	lkb1 interacting protein [Source:VB Community Annotation]
LOC5578274	70.0947	-0.679713	0.238428	-2.85081	0.00436087	0.0534731	AAEL003504	emx homeobox protein [Source:VB Community Annotation]
LOC110675936	5.04784	3.20264	1.12367	2.85016	0.00436975	0.0535324	AAEL022279
LOC5572470	10287.5	-0.421292	0.147871	-2.84905	0.00438502	0.0536698	AAEL009825	60S ribosomal protein L13a [Source:UniProtKB/TrEMBL;Acc:Q16US7]	RpL13a
LOC5574752	101.682	0.627712	0.220438	2.84757	0.00440542	0.0538397	AAEL011390	mitochondrial ribosomal protein, L9, putative [Source:VB Community Annotation]	mRPL9
LOC5567933	171.123	0.553334	0.194326	2.84746	0.00440702	0.0538397	AAEL006373	serine protease htra2 [Source:VB Community Annotation]
LOC5576975	304.601	-0.518778	0.182281	-2.84604	0.00442673	0.0540306	AAEL003071	tRNA pseudouridine synthase D [Source:VB Community Annotation]
LOC5563644	534.283	-0.434788	0.152901	-2.8436	0.00446072	0.0543606	AAEL000077	cation efflux protein/ zinc transporter [Source:VB Community Annotation]
LOC5574052	113.839	0.845286	0.297269	2.84351	0.00446198	0.0543606	AAEL010894	carbonic anhydrase II, putative [Source:VB Community Annotation]
LOC5576837	45.0318	0.991289	0.348771	2.84223	0.00447985	0.0545282	AAEL012816
LOC5573960	177.861	-0.61153	0.215374	-2.83938	0.00452008	0.0549673	AAEL002209
LOC5567996	485.886	0.426849	0.150423	2.83767	0.00454445	0.0551672	AAEL006441	26S proteasome beta 1 subunit [Source:VB Community Annotation]	Prosbeta1
LOC5572019	1792.38	-0.371695	0.130987	-2.83764	0.00454485	0.0551672	AAEL000239	clathrin coat assembly protein [Source:VB Community Annotation]
LOC110674371	31234.7	1.29971	0.458157	2.83682	0.00455651	0.0552581	AAEL024421
LOC5568716	779.888	0.452348	0.159501	2.83603	0.00456788	0.0553453	AAEL007049	proteasome subunit beta type [Source:VB Community Annotation]
LOC110673987	66.0094	1.1939	0.421023	2.83572	0.00457228	0.055348	AAEL027089	Endoplasmic reticulum resident protein 29 [Source:UniProtKB/TrEMBL;Acc:Q16HE7]
LOC5570058	81.6942	-0.730482	0.257807	-2.83345	0.00460487	0.0556916	AAEL000217	serine/threonine protein kinase [Source:VB Community Annotation]
LOC5566126	1014.8	-1.06624	0.376377	-2.8329	0.00461273	0.0557357	AAEL005201	hydroxymethylglutaryl-coa synthase [Source:VB Community Annotation]
LOC5576846	1472.41	2.37785	0.839533	2.83235	0.00462074	0.0557817	AAEL012828
LOC5570531	894.042	-0.510593	0.180446	-2.82962	0.00466038	0.056209	AAEL001434	coronin [Source:VB Community Annotation]
LOC5574385	171.836	0.704022	0.249069	2.82661	0.00470435	0.0566876	AAEL011090	complement component [Source:VB Community Annotation]
LOC110679455	31.8077	-1.40833	0.498325	-2.82612	0.00471149	0.0566991	AAEL023757
LOC5568175	33.6381	1.12996	0.399848	2.82596	0.00471387	0.0566991	AAEL006617
LOC5565318	444.806	0.452305	0.160071	2.82565	0.00471853	0.0567037	AAEL004733	jun activation domain binding protein [Source:VB Community Annotation]
LOC5570702	544.774	-0.624681	0.221186	-2.82423	0.00473945	0.0568827	AAEL001448
LOC5571814	5772.24	1.05464	0.373503	2.82363	0.00474825	0.0568827	AAEL001704
LOC5566893	398.905	0.939886	0.332874	2.82355	0.00474949	0.0568827	AAEL000851	predicted G-protein coupled receptor (GPCR) [Source:VB Community Annotation]
LOC5575005	654.708	-2.76869	0.980598	-2.82348	0.0047506	0.0568827	AAEL021126
LOC5572032	66.8683	0.725025	0.256854	2.82271	0.00476197	0.0569295	AAEL000230
LOC5569497	2916.94	0.567956	0.201215	2.82263	0.00476312	0.0569295	AAEL007681	NADH-ubiquinone oxidoreductase flavoprotein 1 (ndufv1) [Source:VB Community Annotation]
LOC5565779	875.715	-1.06783	0.378456	-2.82153	0.00477947	0.0570365	AAEL004995	Caspase-activated nuclease, putative [Source:UniProtKB/TrEMBL;Acc:A0A1S4F990]
LOC5571199	114.461	-0.748222	0.265195	-2.8214	0.00478148	0.0570365	AAEL018166
LOC5568497	29.2695	-1.31545	0.46628	-2.82116	0.00478498	0.0570365	AAEL006909
LOC5575698	283.073	0.622935	0.220901	2.81998	0.00480269	0.0571342	AAEL012000
LOC5574101	433.055	0.467732	0.165868	2.81991	0.00480367	0.0571342	AAEL002248
LOC110676418	31.8702	1.19234	0.422853	2.81975	0.00480612	0.0571342	AAEL027172
LOC110681424	3.33051	4.14702	1.47088	2.81941	0.00481121	NA	AAEL023931
LOC110674027	62.7488	-1.06105	0.376348	-2.81934	0.00481225	0.0571557	AAEL022762
LOC5567396	111.818	0.60911	0.216152	2.81797	0.00483287	0.0573491	AAEL006053
LOC5567465	382.774	0.453321	0.160901	2.81739	0.00484159	0.0573656	AAEL000942	ER membrane protein complex subunit 4 [Source:UniProtKB/TrEMBL;Acc:Q17MQ7]
LOC5570993	554.278	1.88864	0.670436	2.81704	0.0048469	0.0573656	AAEL008726
LOC5573254	1550.45	-0.614561	0.21816	-2.81701	0.00484725	0.0573656	AAEL010337	CRAL/TRIO domain-containing protein [Source:VB Community Annotation]
LOC5567304	98.1609	0.773371	0.274585	2.81651	0.00485485	0.0574043	AAEL005966
LOC5579385	41.098	2.55231	0.906481	2.81563	0.00486821	0.0575109	AAEL015503
LOC5567031	29192.7	0.61828	0.219663	2.81467	0.00488273	0.0576311	AAEL005766	Fructose-bisphosphate aldolase [Source:UniProtKB/TrEMBL;Acc:Q178U8]
LOC5579016	77.6943	0.676587	0.240441	2.81394	0.00489376	0.0577098	AAEL003781	zinc carboxypeptidase [Source:VB Community Annotation]
LOC5568087	96.567	0.606684	0.215769	2.81173	0.00492751	0.0580561	AAEL006521	COX assembly mitochondrial protein [Source:UniProtKB/TrEMBL;Acc:Q0IF43]
LOC110681054	34.7193	2.16918	0.771771	2.81065	0.00494411	0.0581482	AAEL024607
LOC5578589	34.7193	2.16918	0.771771	2.81065	0.00494411	0.0581482	AAEL013775
LOC5575345	1090.52	0.954413	0.339704	2.80954	0.00496124	0.0582978	AAEL002605	odorant binding protein OBP14 [Source:VB Community Annotation]	OBP14
LOC110676737	4.91233	-2.69615	0.960005	-2.80847	0.00497774	0.0584399	AAEL024439
LOC5578503	283.384	0.622172	0.221562	2.80812	0.00498317	0.0584519	AAEL019998
LOC5570243	17221	-0.515061	0.183482	-2.80715	0.00499827	0.0585771	AAEL008192	40S ribosomal protein S3 [Source:UniProtKB/TrEMBL;Acc:Q4F6X0]	RpS3
LOC5571450	2082.72	0.517935	0.184708	2.80407	0.0050462	0.0590865	AAEL009078	NADH-ubiquinone oxidoreductase sgdh subunit [Source:VB Community Annotation]
LOC110678180	9.51451	2.51979	0.898981	2.80294	0.00506395	0.0592411	AAEL021476
LOC5577482	850.401	-0.550309	0.196369	-2.80243	0.005072	0.0592411	AAEL013225	NADH-cytochrome B5 reductase [Source:VB Community Annotation]
LOC23687671	1285.41	0.655443	0.233889	2.80237	0.00507282	0.0592411	AAEL017251		AGO2
LOC5578087	5.5322	-2.51446	0.898455	-2.79865	0.00513171	0.059876	AAEL003448	GPCR Orphan/Putative Class A Family [Source:VB Community Annotation]	GPRNNA13
LOC5563952	54.3114	1.07357	0.383657	2.79825	0.00513808	0.0598976	AAEL004022
LOC5571213	191.699	-0.545329	0.195002	-2.79653	0.00516541	0.0601632	AAEL008909
LOC5573255	2107.17	1.73293	0.61996	2.79522	0.00518639	0.0603545	AAEL010344	SEC14, putative [Source:VB Community Annotation]
LOC5573904	4275.75	0.616241	0.220501	2.79473	0.00519423	0.0603926	AAEL024828
LOC5569847	188.873	0.673072	0.240914	2.79383	0.00520882	0.0604885	AAEL007962	glutathione transferase [Source:VB Community Annotation]	GSTE4
LOC5573867	536.695	0.57396	0.205451	2.79365	0.00521161	0.0604885	AAEL010793	F-box/leucine rich repeat protein [Source:VB Community Annotation]
LOC5575002	36.575	1.64117	0.58756	2.7932	0.00521896	0.0605208	AAEL027772
LOC110676569	242.474	0.608478	0.21791	2.79233	0.00523297	0.0606302	AAEL025618
LOC5580003	45.4254	-0.891214	0.319228	-2.79178	0.0052419	0.0606685	AAEL009639	Ubiquitin-like protein [Source:UniProtKB/TrEMBL;Acc:A0A1S4FN23]
LOC5576896	1063.59	-0.409368	0.146645	-2.79156	0.00524545	0.0606685	AAEL003039	nonsense-mediated mRNA decay protein [Source:VB Community Annotation]
LOC5577225	113.626	-0.734545	0.263247	-2.79032	0.00526554	0.0608477	AAEL003146
LOC5572010	35.5832	-0.977643	0.350449	-2.78969	0.00527586	0.0608657	AAEL009476
LOC110676393	5.1377	3.28281	1.17678	2.78966	0.00527628	0.0608657	AAEL026402
LOC5568291	100.925	0.655373	0.235006	2.78875	0.00529113	0.0609838	AAEL006748	ss-DNA binding protein 12RNP2 precursor, putative [Source:VB Community Annotation]
LOC5565259	883.062	3.05052	1.09428	2.78771	0.00530825	0.0611279	AAEL004703
LOC5574259	12.0465	-1.9271	0.69137	-2.78736	0.00531394	0.0611403	AAEL011032
LOC5574713	176.29	0.578612	0.207623	2.78684	0.0053224	0.0611845	AAEL011355	carnitine o-acetyltransferase [Source:VB Community Annotation]
LOC5570562	22.7445	1.54295	0.553937	2.78543	0.0053457	0.0613308	AAEL008378	preproacrosin, putative [Source:VB Community Annotation]
LOC23687941	135.433	-1.0277	0.368973	-2.78528	0.0053481	0.0613308	AAEL019787	CCAP receptor [Source:UniProtKB/TrEMBL;Acc:A0A411JKD0]
LOC5565406	100.094	1.02355	0.367496	2.7852	0.00534945	0.0613308	AAEL014844
LOC5572995	319.447	0.594814	0.213582	2.78495	0.00535365	0.0613308	AAEL001936
LOC5575013	276.05	-0.480216	0.172453	-2.78463	0.00535893	0.0613382	AAEL019769
LOC5567919	13.2801	1.77416	0.637384	2.7835	0.00537757	0.0614327	AAEL027429
LOC110674073	51.9785	-0.860538	0.309163	-2.78345	0.00537847	0.0614327	AAEL021869
LOC5567951	64.0687	-0.754976	0.271301	-2.7828	0.00538923	0.0614327	AAEL015393
LOC5579650	2221.73	-1.03258	0.371058	-2.78279	0.00538935	0.0614327	AAEL003965	calpain 4, 6, 7, invertebrate [Source:VB Community Annotation]
LOC5564717	170.363	0.676673	0.243169	2.78273	0.00539038	0.0614327	AAEL014589	reticulocalbin [Source:VB Community Annotation]
LOC5572585	5141.9	0.493881	0.17765	2.78008	0.0054345	0.0618823	AAEL009906
LOC5565594	266.241	0.524288	0.188656	2.77907	0.0054514	0.0620213	AAEL004866	protein farnesyltransferase beta subunit [Source:VB Community Annotation]
LOC5569564	3038.57	-0.591562	0.212957	-2.77784	0.0054721	0.0622035	AAEL025134
LOC5568266	59.2281	0.693685	0.249854	2.77637	0.00549702	0.0624332	AAEL006688	Splicing factor 3B subunit 5 [Source:UniProtKB/TrEMBL;Acc:Q175C9]
LOC5575798	215.421	0.57359	0.206632	2.7759	0.00550496	0.0624697	AAEL012077	NAD dehydrogenase [Source:VB Community Annotation]
LOC5571540	35.7306	1.07722	0.388149	2.77526	0.00551573	0.0625384	AAEL009127	cytochrome P450 [Source:VB Community Annotation]	CYP6M11
LOC110676026	121.183	-0.870916	0.313883	-2.77466	0.00552601	0.0626014	AAEL023651
LOC5567573	28.6743	1.00781	0.363631	2.77153	0.00557938	0.0631152	AAEL006164
LOC110680405	113.091	-0.584506	0.210903	-2.77144	0.0055809	0.0631152	AAEL020945
LOC5570420	478.531	1.08625	0.392171	2.76985	0.00560822	0.06337	AAEL021230
LOC5573760	923.982	-1.32826	0.479733	-2.76874	0.00562735	0.063532	AAEL025888
LOC110677066	10.5117	1.95537	0.706356	2.76825	0.00563582	0.0635663	AAEL027929
LOC5571554	62.5916	0.669587	0.241902	2.76801	0.00563999	0.0635663	AAEL009147
LOC5568633	957.926	0.319949	0.11565	2.76652	0.00566581	0.063803	AAEL007023	estradiol 17 beta-dehydrogenase [Source:VB Community Annotation]
LOC110675827	105.065	-0.736299	0.266197	-2.76599	0.00567495	0.0638312	AAEL024942
LOC5575523	174.725	0.840351	0.30384	2.76577	0.00567885	0.0638312	AAEL011897
LOC5571367	13.6032	2.40005	0.867838	2.76554	0.00568278	0.0638312	AAEL008987
LOC5568712	445.861	-0.605674	0.219064	-2.76483	0.0056953	0.0639177	AAEL007062
LOC5572156	60.8697	1.15166	0.416623	2.76427	0.00570502	0.0639725	AAEL009561	apolipoprotein D, putative [Source:VB Community Annotation]
LOC5580249	322.513	0.679756	0.246001	2.76323	0.00572328	0.064123	AAEL012548	glycosylphosphatidylinositol-specific phospholipase C, putative [Source:VB Community Annotation]
LOC110677933	286.102	1.07305	0.388528	2.76184	0.0057477	0.0643421	AAEL027357
LOC5564188	36.4611	0.892017	0.32304	2.76132	0.0057568	0.0643896	AAEL014340
LOC5564115	100.843	0.691606	0.250962	2.75582	0.00585456	0.0653976	AAEL004113
LOC5567430	234.845	-0.660954	0.239851	-2.75569	0.00585679	0.0653976	AAEL006107	mitotic and DNA damage checkpoint protein hus1 [Source:VB Community Annotation]
LOC5578444	126.769	-0.661538	0.240194	-2.75418	0.00588398	0.0656458	AAEL000509	rho GTPase activating protein [Source:VB Community Annotation]
LOC5580205	218.473	-0.443401	0.161023	-2.75366	0.00589337	0.0656952	AAEL002547	dipeptidase [Source:VB Community Annotation]
LOC110680385	5.36812	-2.48089	0.901171	-2.75297	0.00590581	0.0657785	AAEL026841
LOC5577519	71.0277	0.853658	0.310544	2.74891	0.00597944	0.0665426	AAEL021813
LOC5580062	88.7664	0.650333	0.236645	2.74814	0.00599349	0.066643	AAEL002135	tubulin-specific chaperone b (tubulin folding cofactor b) [Source:VB Community Annotation]
LOC23687565	316.07	-2.44848	0.891129	-2.74762	0.00600304	0.0666662	AAEL017145
LOC110678407	5.17463	-3.2854	1.19579	-2.74747	0.00600565	0.0666662	AAEL025861
LOC110679692	373.727	-0.449015	0.163455	-2.74702	0.0060139	0.0667019	AAEL021284
LOC5576724	81.6279	-1.63098	0.593818	-2.7466	0.00602166	0.0667321	AAEL002959	brain chitinase and chia [Source:VB Community Annotation]
LOC5570224	55.6003	2.574	0.937519	2.74554	0.00604106	0.0668878	AAEL023000
LOC5574805	224.961	0.663999	0.241869	2.74529	0.00604581	0.0668878	AAEL019644
LOC5564352	113.126	-0.86088	0.313645	-2.74476	0.00605546	0.0669386	AAEL004213	monocarboxylate transporter [Source:VB Community Annotation]
LOC5577403	29.6738	1.00625	0.366661	2.74436	0.00606294	0.0669654	AAEL003165	low molecular weight protein-tyrosine-phosphatase [Source:VB Community Annotation]
LOC5564976	170.59	0.853536	0.311152	2.74315	0.00608523	0.0671188	AAEL004532	glyoxylate/hydroxypyruvate reductase [Source:VB Community Annotation]
LOC5565824	260.996	0.421292	0.1536	2.74279	0.00609203	0.0671188	AAEL019642
LOC5576254	260.996	0.421292	0.1536	2.74279	0.00609203	0.0671188	AAEL019643
LOC110681159	2582.94	0.384739	0.14033	2.74168	0.0061126	0.0672894	AAEL021894
LOC5573968	10755.8	0.583874	0.213032	2.74078	0.00612932	0.0673659	AAEL010823	ATP synthase delta chain [Source:VB Community Annotation]
LOC5576100	543.533	0.379358	0.138413	2.74076	0.00612972	0.0673659	AAEL002789	26S proteasome non-ATPase regulatory subunit [Source:VB Community Annotation]
LOC5575152	365.008	0.432803	0.157932	2.74043	0.00613592	0.0673781	AAEL029004
LOC5573422	434.672	-0.817372	0.298312	-2.73999	0.00614405	0.0674114	AAEL002043	cytochrome P450 [Source:VB Community Annotation]	CYP305A5
LOC5571413	437.553	0.567795	0.20729	2.73914	0.00616008	0.0674675	AAEL009042	ubiquitin fusion degradaton protein [Source:VB Community Annotation]
LOC110673978	3024.66	0.782143	0.285557	2.73901	0.00616249	0.0674675	AAEL019718
LOC5578279	601.829	-0.437671	0.159814	-2.73863	0.00616954	0.0674675	AAEL021732
LOC110680627	18698.6	0.915611	0.334341	2.73855	0.00617102	0.0674675	AAEL022665
LOC5578336	102.67	-0.656494	0.23974	-2.73836	0.00617463	0.0674675	AAEL003518	calcium-transporting ATPase 2 (ATPase 2) [Source:VB Community Annotation]
LOC5570913	4502.24	-0.479653	0.175186	-2.73796	0.00618209	0.0674817	AAEL001484	chromosome region maintenance protein 1/exportin [Source:VB Community Annotation]
LOC5579522	238.707	-0.597472	0.218235	-2.73775	0.00618612	0.0674817	AAEL014566	wingless [Source:VB Community Annotation]
LOC5578212	24.9431	-1.23561	0.451397	-2.73731	0.00619441	0.0675165	AAEL003479
LOC110678903	43.5536	-1.50351	0.549391	-2.73669	0.00620602	0.0675595	AAEL024778
LOC5579217	71.8046	1.20742	0.441218	2.73656	0.00620856	0.0675595	AAEL026991	Endoplasmic reticulum resident protein 29 [Source:UniProtKB/TrEMBL;Acc:Q16HE7]
LOC5570976	806.379	-0.469257	0.171508	-2.73607	0.0062178	0.0676046	AAEL008714
LOC5567964	3164.8	1.60228	0.585683	2.73575	0.00622378	0.067614	AAEL006425	trypsin [Source:VB Community Annotation]
LOC110680797	161.51	0.596744	0.218157	2.73539	0.00623066	0.0676334	AAEL024731
LOC5573822	11.7867	-1.57883	0.57734	-2.73466	0.00624446	0.0677275	AAEL010745	four-jointed protein, putative [Source:VB Community Annotation]
LOC5567014	509.6	-1.13266	0.414656	-2.73158	0.00630319	0.0682691	AAEL005763	lysosomal alpha-mannosidase (mannosidase alpha class 2b member 1) [Source:VB Community Annotation]
LOC5577026	2916.97	0.574492	0.210321	2.7315	0.0063047	0.0682691	AAEL012950	NADH-ubiquinone oxidoreductase 42 kda subunit [Source:VB Community Annotation]
LOC110677200	8.49518	-1.86328	0.682343	-2.73071	0.00631978	0.0683447	AAEL023995
LOC5566531	693.253	-0.354849	0.129968	-2.73028	0.00632797	0.0683447	AAEL027240
LOC5564405	404.103	0.690845	0.253042	2.73016	0.00633043	0.0683447	AAEL004229	glutathione transferase [Source:VB Community Annotation]	GSTT4
LOC5573817	69.6611	-0.773417	0.283308	-2.72995	0.00633447	0.0683447	AAEL010739	WNT4 precursor, putative [Source:VB Community Annotation]
LOC5576079	1087.71	0.415598	0.152245	2.72979	0.00633748	0.0683447	AAEL012317	MICOS complex subunit MIC13 [Source:UniProtKB/TrEMBL;Acc:Q1HRM0]
LOC5565037	124.504	0.780758	0.286203	2.72799	0.00637224	0.0686636	AAEL004547
LOC110678311	4.29224	-2.93546	1.0764	-2.7271	0.00638932	0.0687917	AAEL027214
LOC5571143	821.275	-0.45342	0.166298	-2.72655	0.00639998	0.0688505	AAEL008853	choline/ethanolamine kinase [Source:VB Community Annotation]
LOC110681466	46.7081	-1.16859	0.429077	-2.72349	0.00645959	0.0694353	AAEL025676
LOC5566137	386.307	0.580462	0.213198	2.72265	0.00647609	0.0695563	AAEL005190	mitochondrial ribosomal protein, L42, putative [Source:VB Community Annotation]	mRpL42
LOC110680828	21.2751	-1.10515	0.406094	-2.72141	0.00650036	0.0697603	AAEL027008
LOC110677901	78.0383	-0.950051	0.349438	-2.7188	0.00655191	0.0702566	AAEL023509
LOC5578874	123.562	1.70963	0.628974	2.71813	0.00656529	0.0703431	AAEL012902	heterogeneous nuclear ribonucleoprotein, putative [Source:VB Community Annotation]
LOC5577466	301.338	-0.461316	0.16998	-2.71395	0.0066486	0.0711781	AAEL013213	enhancer of zeste, ezh [Source:VB Community Annotation]
LOC5565115	118.345	0.706253	0.260292	2.71331	0.00666142	0.0712578	AAEL014729	protein serine/threonine kinase, putative [Source:VB Community Annotation]
LOC5571200	61.333	0.759234	0.28007	2.71088	0.00671055	0.0717115	AAEL008899
LOC5566092	10618.4	0.604335	0.222946	2.71067	0.00671466	0.0717115	AAEL005170	cytochrome c oxidase subunit iv [Source:VB Community Annotation]
LOC5577275	52.7071	-1.76661	0.65244	-2.70769	0.00677526	0.0723004	AAEL013118
LOC5579662	470.78	1.02608	0.379057	2.70694	0.00679063	0.0724061	AAEL003977	elongase, putative [Source:VB Community Annotation]
LOC110678401	1215.83	1.79809	0.664621	2.70543	0.00682161	0.0726779	AAEL021262
LOC5568968	77.2211	-0.863187	0.319154	-2.70461	0.00683838	0.072798	AAEL007268
LOC5576782	2305.17	-0.818866	0.302925	-2.7032	0.00686754	0.0730497	AAEL012762	cytochrome P450 [Source:VB Community Annotation]	CYP325N2
LOC5573395	478.109	0.537718	0.198964	2.70259	0.00688016	0.0731252	AAEL002068	mitochondrial processing peptidase alpha subunit [Source:VB Community Annotation]
LOC5569992	818.254	0.569056	0.210699	2.70079	0.00691744	0.0734624	AAEL026806
LOC5577299	547.942	-3.25997	1.20812	-2.69839	0.00696753	0.0739351	AAEL013156
LOC5578131	1645.12	-0.54734	0.202882	-2.69782	0.00697949	0.0740027	AAEL013515	pupal cuticle protein, putative [Source:VB Community Annotation]
LOC110674007	4.26836	2.92922	1.08596	2.69736	0.0069891	0.0740453	AAEL007669	oxidoreductase [Source:VB Community Annotation]
LOC5568306	48.5284	0.796536	0.295347	2.69695	0.00699781	0.0740783	AAEL006755
LOC5577378	100.281	-0.593798	0.220494	-2.69303	0.00708049	0.0748937	AAEL000420	cathepsin o [Source:VB Community Annotation]
LOC5567773	11.1266	2.42954	0.902393	2.69233	0.00709546	0.0749921	AAEL000146	nitrilase, putative [Source:VB Community Annotation]
LOC5579491	106.894	0.629143	0.233767	2.69132	0.00711693	0.0751591	AAEL015275
LOC5568786	192.947	0.549929	0.204404	2.69041	0.0071365	0.0753057	AAEL007137
LOC5565368	2850.46	-0.417557	0.155244	-2.68969	0.00715191	0.0754083	AAEL004768
LOC5576069	347.278	0.572198	0.212765	2.68934	0.00715944	0.0754275	AAEL026118
LOC5567235	387.773	0.859497	0.319776	2.68781	0.00719223	0.0757128	AAEL000890
LOC5575604	244.502	0.480052	0.178631	2.6874	0.00720101	0.075745	AAEL011934	glutathione transferase [Source:VB Community Annotation]	GSTZ1
LOC5574111	14.7219	1.59741	0.594675	2.68619	0.00722714	0.0759596	AAEL002276	serine protease, putative [Source:VB Community Annotation]
LOC5567091	419.668	0.478302	0.178116	2.68534	0.00724558	0.0760592	AAEL012313	charged multivesicular body protein 5 [Source:VB Community Annotation]
LOC5569471	757.169	-0.366436	0.136464	-2.68522	0.00724811	0.0760592	AAEL007660	suppressor of actin (sac) [Source:VB Community Annotation]
LOC5566830	15.3751	1.95206	0.727047	2.68491	0.00725489	0.0760701	AAEL005668
LOC5574139	236.008	-0.551404	0.205601	-2.68191	0.00732026	0.0766948	AAEL010954
LOC5580071	1347.97	-0.751535	0.280273	-2.68143	0.00733074	0.0767031	AAEL002152	kinesin-associated proteins [Source:VB Community Annotation]
LOC5566589	620.543	-0.404404	0.150821	-2.68135	0.00733263	0.0767031	AAEL019580
LOC5578692	122.885	0.708006	0.264079	2.68104	0.00733927	0.076706	AAEL022578	Clip-domain serine protease [Source:UniProtKB/TrEMBL;Acc:Q1HQI3]
LOC110676043	15.6724	1.31391	0.490118	2.68081	0.0073445	0.076706	AAEL025002
LOC5572518	2543.36	-4.04728	1.51037	-2.67966	0.00736969	0.0769085	AAEL009849
LOC5577692	408.732	0.725213	0.270669	2.67934	0.00737676	0.0769216	AAEL013325
LOC110674715	87.6431	-0.787132	0.294016	-2.67718	0.00742457	0.0773592	AAEL027748
LOC5570044	427.591	-0.701412	0.262056	-2.67657	0.00743797	0.077438	AAEL019940
LOC5572009	120.325	1.9211	0.717902	2.676	0.00745076	0.0775101	AAEL009480
LOC110676553	322.268	-0.597415	0.223286	-2.67555	0.00746062	0.0775518	AAEL021008
LOC5564118	105.621	1.01089	0.37803	2.67409	0.00749315	0.0778289	AAEL004118	aldo-keto reductase [Source:VB Community Annotation]
LOC5569893	395.159	-0.530793	0.198643	-2.6721	0.0075378	0.0782313	AAEL007996	centaurin alpha [Source:VB Community Annotation]
LOC5576283	2855.24	0.868259	0.325154	2.6703	0.00757835	0.0785817	AAEL012446	Inhibitor of Apoptosis (IAP) containing Baculoviral IAP Repeat(s) (BIR domains). [Source:VB Community Annotation]	IAP6
LOC5570208	115.541	0.614655	0.230201	2.67007	0.00758344	0.0785817	AAEL008169	40S ribosomal protein S12 [Source:VB Community Annotation]	RpS12
LOC5578665	39.2698	2.1461	0.803876	2.6697	0.00759202	0.0786091	AAEL003619	sodium/chloride dependent amino acid transporter [Source:VB Community Annotation]
LOC5569670	12919.6	-0.315179	0.118096	-2.66883	0.00761155	0.0787313	AAEL007824	40S ribosomal protein S29 [Source:UniProtKB/TrEMBL;Acc:Q1HRA1]	RpS29
LOC5568897	1144.41	-0.707695	0.265188	-2.66865	0.00761571	0.0787313	AAEL026878
LOC5569827	31.8282	1.12307	0.421091	2.66706	0.0076518	0.0790427	AAEL007940	gustatory receptor Gr77 [Source:VB Community Annotation]	Gr77	GPRgr77
LOC5575157	126.482	-1.14409	0.429047	-2.66659	0.00766245	0.079091	AAEL000382	myosin motor, putative [Source:VB Community Annotation]
LOC110680750	2.01639	4.45334	1.67028	2.66622	0.00767094	NA	AAEL026189
LOC5565198	217.04	-0.93938	0.352414	-2.66556	0.00768607	0.0792731	AAEL014754
LOC5569846	324.821	-0.478094	0.17939	-2.66511	0.00769631	0.0793169	AAEL018149
LOC5571596	15652.1	-0.334348	0.125503	-2.66407	0.00772009	0.0795002	AAEL009185	arginine or creatine kinase [Source:VB Community Annotation]
LOC5572541	288.895	2.43291	0.914036	2.66172	0.00777425	0.0799425	AAEL028144
LOC5577544	367.311	0.440851	0.165629	2.66168	0.00777512	0.0799425	AAEL013256
LOC23687599	12.3006	-1.45515	0.546852	-2.66096	0.00779186	0.0800425	AAEL017179
LOC110674085	21.024	-1.44149	0.541764	-2.66074	0.00779694	0.0800425	AAEL021443
LOC110677172	47.4624	1.77288	0.666405	2.66035	0.00780583	0.0800718	AAEL022308
LOC110680561	4570.37	0.617657	0.232231	2.65967	0.00782174	0.0801108	AAEL024040
LOC5566726	4570.37	0.617657	0.232231	2.65967	0.00782174	0.0801108	AAEL005610	mitochondrial ATP synthase b chain [Source:VB Community Annotation]
LOC5563664	1404.2	0.355051	0.133508	2.65941	0.00782786	0.0801116	AAEL000084	elongin b [Source:VB Community Annotation]
LOC5569267	499.632	0.500578	0.188286	2.6586	0.00784661	0.0802023	AAEL007509	neuroendocrine differentiation factor [Source:VB Community Annotation]
LOC5565410	196.812	0.504221	0.189663	2.6585	0.00784884	0.0802023	AAEL014852
LOC5568409	133.849	2.08015	0.782988	2.65668	0.00789147	0.0804803	AAEL006826
LOC5578640	1708.5	1.51942	0.571935	2.65663	0.00789261	0.0804803	AAEL013793
LOC5569237	10019	0.673671	0.253588	2.65656	0.00789428	0.0804803	AAEL026565
LOC5579479	247.085	-0.630136	0.237601	-2.65207	0.00799991	0.0814828	AAEL019900
LOC5580070	2300.87	-0.345604	0.130327	-2.65183	0.00800575	0.0814828	AAEL002160	GTP-binding protein [Source:VB Community Annotation]
LOC5571358	466.44	2.3595	0.889839	2.6516	0.00801107	0.0814828
LOC5579060	125.596	0.519268	0.195904	2.65063	0.0080342	0.0816554	AAEL013992
LOC5568887	109.593	-1.08608	0.409814	-2.65017	0.00804515	0.0817039	AAEL024884
LOC5575982	1263.14	-0.403115	0.152229	-2.64808	0.00809513	0.0820945	AAEL019430
LOC5571329	123.795	1.76127	0.665121	2.64804	0.008096	0.0820945	AAEL009007
LOC5576444	447.07	-0.373237	0.140967	-2.64768	0.00810452	0.0821179	AAEL012539	heparan sulphate n-deacetylase/n-sulfotransferase [Source:VB Community Annotation]
LOC5564731	90.6251	0.594518	0.224616	2.64682	0.00812533	0.0822235	AAEL004414
LOC5565069	85.5865	-0.794384	0.300137	-2.64673	0.00812735	0.0822235	AAEL004572
LOC5571145	2114.53	-0.356533	0.134722	-2.64644	0.00813434	0.0822313	AAEL018032
LOC5573104	67.4872	-0.641475	0.242436	-2.64596	0.008146	0.0822865	AAEL010287
LOC5574410	290.2	0.414663	0.156975	2.64158	0.00825193	0.0832336	AAEL011113
LOC5571616	74.657	-1.29582	0.490565	-2.64148	0.00825444	0.0832336	AAEL009194
LOC5569800	9550.08	0.500157	0.18936	2.64131	0.00825863	0.0832336	AAEL001319
LOC5571797	264.668	0.467551	0.177037	2.64099	0.00826653	0.0832499	AAEL020535
LOC5576031	157.736	0.567724	0.215084	2.63954	0.00830183	0.0834808	AAEL012264	mitochondrial ribosomal protein L24 [Source:VB Community Annotation]	mRpL24
LOC5573776	161.12	-0.541238	0.205051	-2.63953	0.00830206	0.0834808	AAEL000271	gamma-glutamyl hydrolase [Source:VB Community Annotation]
LOC5575865	37.494	1.06191	0.402525	2.63813	0.00833648	0.0837599	AAEL012135	Galectin [Source:UniProtKB/TrEMBL;Acc:Q16MZ7]	GALE2
LOC5568585	100.994	0.589393	0.223434	2.63789	0.00834247	0.0837599	AAEL001131	splicing factor, putative [Source:VB Community Annotation]
LOC5574138	195.082	0.480652	0.182255	2.63724	0.00835825	0.0838548	AAEL010945
LOC5573631	12.3986	-5.20282	1.97379	-2.63596	0.00839004	0.08411	AAEL010631
LOC5569262	683.267	-1.23648	0.46965	-2.63277	0.00846923	0.0848143	AAEL007508	oviductin [Source:VB Community Annotation]
LOC23687425	24.7571	-1.37392	0.521885	-2.63261	0.0084731	0.0848143	AAEL017005	GPCR Neuropeptide Y Family [Source:VB Community Annotation]	GPRNPY6	GPRNPY6B
LOC5567513	2659.99	1.18304	0.44953	2.63172	0.00849545	0.0848977	AAEL006014	heme peroxidase [Source:VB Community Annotation]	HPX1
LOC5570396	640.504	0.330781	0.125694	2.63164	0.00849728	0.0848977	AAEL008291
LOC5574207	57.1572	-0.767082	0.291499	-2.63151	0.00850067	0.0848977	AAEL021698
LOC5577570	639.434	-2.75648	1.04803	-2.63016	0.00853437	0.0851279	AAEL013283	serine-type enodpeptidase [Source:VB Community Annotation]
LOC5575590	74.3011	1.10411	0.419801	2.63008	0.00853658	0.0851279	AAEL002669	AMP dependent ligase [Source:VB Community Annotation]
LOC5573585	4530.78	2.22073	0.844695	2.62904	0.00856273	0.0852807	AAEL002111	cuticle protein, putative [Source:VB Community Annotation]
LOC110676014	31.9145	1.08418	0.41243	2.62876	0.00856957	0.0852807	AAEL025235
LOC5570655	151.18	-0.810685	0.308436	-2.62837	0.00857939	0.0852807	AAEL008466	homeobox protein b [Source:VB Community Annotation]
LOC5566878	1241.79	-0.448764	0.170748	-2.62822	0.00858321	0.0852807	AAEL021073
LOC110676305	29.2754	0.924634	0.351814	2.62819	0.00858409	0.0852807	AAEL024244
LOC5566252	154.694	-0.57154	0.217528	-2.62744	0.00860311	0.0854056	AAEL005284	receptor tyrosine phosphatase type r2a [Source:VB Community Annotation]
LOC5573518	65.5343	0.739787	0.281627	2.62683	0.00861837	0.085493	AAEL010572	late endosomal/lysosomal MP1 interacting protein, putative [Source:VB Community Annotation]
LOC5567589	116.885	0.694155	0.264387	2.62553	0.00865154	0.0857577	AAEL006175
LOC5572715	127.646	0.552591	0.210537	2.62467	0.0086732	0.0859082	AAEL009981	chaperone atp11p [Source:VB Community Annotation]
LOC5567692	298.194	-0.777901	0.296684	-2.62198	0.00874201	0.086525	AAEL018114
LOC5571240	142.879	-1.4837	0.566101	-2.62091	0.00876949	0.0867322	AAEL028048
LOC110679593	15.0431	-1.55263	0.592537	-2.62031	0.00878505	0.0867779	AAEL026911
LOC5569551	392.311	-0.548432	0.209307	-2.62022	0.00878722	0.0867779	AAEL024540
LOC5569904	3888.1	-1.19437	0.455986	-2.61931	0.00881083	0.0868902	AAEL007997
LOC5568763	57.4728	-1.3083	0.499488	-2.61927	0.00881172	0.0868902	AAEL007121	tartan [Source:VB Community Annotation]
LOC5565278	93.267	-0.629868	0.24057	-2.61823	0.00883869	0.0870914	AAEL023512
LOC110680229	5804.17	0.469178	0.179249	2.61747	0.00885849	0.0871661	AAEL024451
LOC110675742	18.8818	1.10997	0.424068	2.61743	0.00885944	0.0871661	AAEL025149
LOC5580036	3200.32	0.642858	0.245666	2.61679	0.00887608	0.0872122	AAEL010230	NADH:ubiquinone dehydrogenase, putative [Source:VB Community Annotation]
LOC5570230	115.227	0.636456	0.243225	2.61674	0.0088773	0.0872122	AAEL008152	short-chain dehydrogenase [Source:VB Community Annotation]
LOC5576817	581.043	-2.06354	0.789234	-2.61461	0.00893298	0.0876942	AAEL027037
LOC5569123	160.394	-0.510032	0.195102	-2.61418	0.0089442	0.0877393	AAEL007387
LOC5571193	15.8897	-1.86543	0.713968	-2.61276	0.0089815	0.0879832	AAEL008889	cytochrome P450 [Source:VB Community Annotation]	CYP6AL1
LOC5579351	453.022	-0.457447	0.175084	-2.61273	0.00898235	0.0879832	AAEL015543
LOC5570908	107.452	-0.537231	0.205673	-2.61207	0.00899955	0.0880865	AAEL001483
LOC5577431	21.2525	-1.0369	0.39705	-2.6115	0.00901448	0.0881675	AAEL013174
LOC5568211	11659	-0.520327	0.199297	-2.61081	0.00903286	0.088282	AAEL006642	Tubulin alpha chain [Source:UniProtKB/TrEMBL;Acc:Q1HR53]
LOC5576735	752.583	-2.58449	0.990153	-2.61019	0.00904916	0.0883761	AAEL018289
LOC5578097	73.129	-0.730045	0.27973	-2.60982	0.00905897	0.0884067	AAEL003436	transcription factor coe3 [Source:VB Community Annotation]
LOC110677843	154.687	-0.596204	0.228493	-2.60929	0.0090731	0.0884311	AAEL019941
LOC5569815	486.31	-0.528352	0.202506	-2.60907	0.0090788	0.0884311	AAEL001293
LOC5578110	151.068	-0.484494	0.185703	-2.60897	0.0090815	0.0884311	AAEL020003
LOC5573751	409.912	0.918933	0.352388	2.60773	0.00911438	0.0886704	AAEL000294
LOC110677954	5.08483	2.68408	1.02945	2.6073	0.00912596	0.0886704	AAEL025084
LOC5575443	55.7876	-0.948647	0.363844	-2.60729	0.00912616	0.0886704	AAEL019572
LOC5569632	1353.04	-0.46581	0.178693	-2.60675	0.00914051	0.0887447	AAEL007777	vacuolar ATP synthase subunit S1 [Source:VB Community Annotation]
LOC5573934	97.2249	-0.706379	0.271216	-2.60449	0.00920115	0.0892047	AAEL002186
LOC5576501	4062.18	0.459359	0.176373	2.60448	0.00920136	0.0892047	AAEL012552	NADH-ubiquinone oxidoreductase [Source:VB Community Annotation]
LOC110679621	65.4308	0.712172	0.273536	2.60358	0.00922551	0.0893734	AAEL026013
LOC5579916	49.4456	0.736784	0.283137	2.60222	0.0092622	0.0894695	AAEL001015
LOC5565084	165.846	0.58968	0.226617	2.6021	0.00926553	0.0894695	AAEL014719	inosine-uridine preferring nucleoside hydrolase [Source:VB Community Annotation]
LOC5567762	91.3896	0.754431	0.289941	2.60202	0.00926777	0.0894695	AAEL000137
LOC110678853	101.092	0.763398	0.293469	2.60129	0.00928739	0.0894695	AAEL022936
LOC5576157	768.62	-0.486306	0.186949	-2.60129	0.00928751	0.0894695	AAEL012352
LOC5565375	30.9044	0.970466	0.373082	2.60122	0.00928942	0.0894695	AAEL004751	pupal cuticle protein, putative [Source:VB Community Annotation]
LOC5573872	10758.3	-0.4395	0.168972	-2.60103	0.00929456	0.0894695	AAEL010787	DEAD box ATP-dependent RNA helicase [Source:VB Community Annotation]
LOC5573003	21.0567	-1.19966	0.461233	-2.60099	0.00929548	0.0894695	AAEL001922
LOC5568516	1112.88	0.461931	0.1776	2.60096	0.00929623	0.0894695	AAEL006929	cullin [Source:VB Community Annotation]
LOC5575432	795.401	0.376272	0.144684	2.60065	0.00930468	0.0894858	AAEL011830	Probable methylthioribulose-1-phosphate dehydratase (MTRu-1-P dehydratase)(EC 4.2.1.109) [Source:VB Community Annotation]
LOC5565637	907.377	0.387423	0.149186	2.59691	0.00940661	0.0904004	AAEL014915	26S proteasome subunit [Source:VB Community Annotation]
LOC5576750	262.703	0.482785	0.185958	2.5962	0.00942617	0.0905227	AAEL012739
LOC110674054	1035.34	-2.08523	0.803316	-2.59578	0.00943776	0.0905683	AAEL027261
LOC5564630	210.779	-0.531946	0.204947	-2.59553	0.00944464	0.0905687	AAEL004383
LOC5565979	24528.7	-0.412137	0.158848	-2.59454	0.00947177	0.0907631	AAEL005097	cold induced protein (BnC24A), putative [Source:VB Community Annotation]
LOC5580319	225.599	0.449072	0.173111	2.59413	0.00948299	0.0908049	AAEL019792
LOC5571173	1798.38	0.650308	0.250742	2.59353	0.00949961	0.0908984	AAEL008871	succinate dehydrogenase [Source:VB Community Annotation]
LOC5569673	255.605	0.423579	0.1634	2.59228	0.00953412	0.0911628	AAEL007821	signalosome, subunit 2, CSN8, putative [Source:VB Community Annotation]
LOC5577595	71.5286	1.25701	0.485085	2.59132	0.00956075	0.0913514	AAEL003255
LOC5567500	262.534	0.484929	0.187194	2.59051	0.00958333	0.0915012	AAEL006117	39S ribosomal protein L12, mitochondrial [Source:UniProtKB/TrEMBL;Acc:Q1HQL1]	mRpL12
LOC5567338	2932.74	0.921453	0.356272	2.58638	0.00969909	0.0924729	AAEL019718
LOC5569747	195.644	-0.532774	0.206039	-2.58579	0.0097155	0.0924729	AAEL025379
LOC5577734	324.773	-0.594891	0.230066	-2.58574	0.00971691	0.0924729	AAEL019516
LOC5573297	511.647	0.598409	0.231451	2.58547	0.00972468	0.0924729	AAEL026787
LOC5566140	66.6011	0.721102	0.278908	2.58545	0.0097252	0.0924729	AAEL005171
LOC5571409	35.4646	1.15644	0.447335	2.58517	0.00973306	0.0924729	AAEL009051	Thioredoxin Peroxidase. [Source:VB Community Annotation]	TPX5
LOC5567307	530.852	-1.99496	0.771739	-2.58502	0.0097372	0.0924729	AAEL005960
LOC23687491	44.7787	0.97571	0.377466	2.58489	0.00974097	0.0924729	AAEL017071	Carboxylic ester hydrolase [Source:UniProtKB/TrEMBL;Acc:A0A1S4G5Q9]
LOC5577894	74.376	0.74531	0.288459	2.58376	0.00977285	0.0927091	AAEL013410
LOC110676679	355.022	-0.41173	0.159371	-2.58347	0.00978116	0.0927215	AAEL022190
LOC5577606	5538.34	1.15413	0.446942	2.58228	0.00981501	0.0928721	AAEL003259	pupal cuticle protein 78E, putative [Source:VB Community Annotation]
LOC5564744	1494.4	-1.17307	0.454296	-2.58218	0.00981781	0.0928721	AAEL024186
LOC5567591	74.8132	-0.647321	0.250688	-2.58217	0.00981809	0.0928721	AAEL024064
LOC5564678	689.515	-0.407442	0.157838	-2.5814	0.00984008	0.0930137	AAEL004389	mannosidase alpha class 2a [Source:VB Community Annotation]
LOC110677839	151.159	-0.974747	0.377699	-2.58075	0.00985852	0.0931215	AAEL026461
LOC5568260	13261.2	-0.404157	0.156629	-2.58034	0.00987031	0.0931664	AAEL006698	60S ribosomal protein L31 [Source:UniProtKB/Swiss-Prot;Acc:Q9GN74]	RpL31
LOC5574188	215.969	1.50507	0.583383	2.5799	0.00988277	0.0932177	AAEL002292	glucose transport protein, putative [Source:VB Community Annotation]
LOC5569116	52.8475	0.712035	0.276075	2.57913	0.00990495	0.0933603	AAEL007367
LOC110681558	826.858	-2.45357	0.951533	-2.57855	0.00992166	0.0934513	AAEL004564
LOC5573304	55.0038	1.37019	0.531447	2.57823	0.00993079	0.0934709	AAEL010398
LOC110677852	257.717	0.515655	0.200053	2.57759	0.00994919	0.0935209	AAEL022168	50S ribosomal protein L35 [Source:UniProtKB/TrEMBL;Acc:A0A0P6IVN7]
LOC110678426	89.4219	-0.607765	0.235791	-2.57755	0.00995023	0.0935209	AAEL024090
LOC5568366	35.9755	0.851392	0.330462	2.57637	0.00998436	0.0937751	AAEL001073	malic enzyme [Source:VB Community Annotation]
LOC110676526	94.3676	-0.986304	0.382887	-2.57597	0.00999607	0.0938084	AAEL022419
LOC5580170	949.514	-0.744529	0.28906	-2.57569	0.0100041	0.0938084	AAEL002571	band 4.1-like protein 4A (NBL4 protein), putative [Source:VB Community Annotation]
LOC5579187	8411.8	0.341276	0.132508	2.57551	0.0100092	0.0938084	AAEL003873	Glycerol-3-phosphate dehydrogenase [Source:UniProtKB/TrEMBL;Acc:Q17E82]
LOC5564875	94.1896	-0.683251	0.265348	-2.57492	0.0100263	0.093903	AAEL004462
LOC5571869	1371.83	0.353456	0.137307	2.5742	0.0100473	0.0939981	AAEL021624
LOC5569000	202.888	1.01898	0.395902	2.57382	0.0100583	0.0939981	AAEL007283	acetyl-coa synthetase [Source:VB Community Annotation]
LOC5568076	1997.2	0.26615	0.103414	2.57364	0.0100635	0.0939981	AAEL006520
LOC5579807	149.28	0.793869	0.308467	2.57359	0.0100649	0.0939981	AAEL003954	juvenile hormone-inducible protein, putative [Source:VB Community Annotation]
LOC5572105	66.851	-0.862595	0.335256	-2.57294	0.0100837	0.0940414	AAEL019522
LOC110680824	158.068	0.47457	0.184467	2.57265	0.0100924	0.0940414	AAEL024850	Transcription elongation factor 1 homolog [Source:UniProtKB/TrEMBL;Acc:Q0IFZ5]
LOC5578932	158.068	0.47457	0.184467	2.57265	0.0100924	0.0940414	AAEL024850	Transcription elongation factor 1 homolog [Source:UniProtKB/TrEMBL;Acc:Q0IFZ5]
LOC110678645	7.87953	-2.099	0.815983	-2.57236	0.0101008	0.0940414	AAEL025962
LOC5564641	60.8502	0.709194	0.275714	2.57221	0.010105	0.0940414	AAEL004355
LOC5565992	172.103	0.792617	0.308186	2.57188	0.0101148	0.0940662	AAEL015038	palmitoyl-protein thioesterase [Source:VB Community Annotation]
LOC110676867	13.8582	1.27629	0.496523	2.57045	0.0101567	0.0942756	AAEL022399
LOC110679565	13.8582	1.27629	0.496523	2.57045	0.0101567	0.0942756	AAEL020089
LOC5570402	7.70543	-1.86134	0.72415	-2.57038	0.0101587	0.0942756	AAEL021032
LOC5571308	145.399	0.626722	0.243852	2.57009	0.0101673	0.0942897	AAEL008962
LOC5564403	1998.22	-0.452634	0.176165	-2.56937	0.0101883	0.0943561	AAEL004236	arf6 guanine nucleotide exchange factor [Source:VB Community Annotation]
LOC5578107	2297.12	0.374758	0.145857	2.56936	0.0101887	0.0943561	AAEL003407
LOC110678575	2554.41	0.650324	0.253136	2.56907	0.0101972	0.0943684	AAEL024863
LOC5578121	736.325	0.343166	0.133663	2.56739	0.0102468	0.0947613	AAEL003431	proteasome subunit beta type 7,10 [Source:VB Community Annotation]
LOC5575526	34.8004	-0.893106	0.348012	-2.56631	0.0102787	0.0949903	AAEL011900	N-acetyllactosaminide beta-1,3-N-acetylglucosaminyltransferase, putative [Source:VB Community Annotation]
LOC5579856	2712.22	-0.567637	0.221248	-2.56561	0.0102993	0.0951043	AAEL005849	synaptic vesicle protein [Source:VB Community Annotation]
LOC5567266	231.072	1.91555	0.746685	2.56541	0.0103054	0.0951043	AAEL005924
LOC5580075	7.00761	-2.36399	0.922394	-2.56288	0.0103807	0.0957327	AAEL020560
LOC110678695	14.0333	2.34003	0.913426	2.56182	0.0104125	0.0958987	AAEL028145
LOC5572922	66.6025	0.68986	0.269287	2.5618	0.0104132	0.0958987	AAEL010141
LOC110674648	1.80947	4.30401	1.6808	2.56069	0.0104464	NA	AAEL024080
LOC5568413	74.0433	1.17161	0.457556	2.56057	0.01045	0.0961702	AAEL006827	cytochrome P450 [Source:VB Community Annotation]	CYP12F8
LOC110677851	155.05	0.618282	0.241494	2.56024	0.01046	0.0961959	AAEL026664
LOC5570007	1826.68	-0.316913	0.123828	-2.5593	0.0104883	0.0963893	AAEL000175	Eukaryotic translation initiation factor 3 subunit C [Source:UniProtKB/Swiss-Prot;Acc:Q17Q06]	eIF3-S8
LOC5567715	364.037	-0.361112	0.141114	-2.55901	0.010497	0.0964017	AAEL006300	P53 induced protein [Source:VB Community Annotation]
LOC110675401	1.97148	4.4276	1.73097	2.55788	0.0105312	NA	AAEL027233
LOC110678504	838.557	0.556412	0.217555	2.55757	0.0105405	0.0967346	AAEL008072	NADH-plastoquinone oxidoreductase [Source:UniProtKB/TrEMBL;Acc:A0A1S4FIE9]
LOC5572440	1094.69	-0.491363	0.192154	-2.55714	0.0105538	0.0967895	AAEL021826
LOC5574868	96.6606	-0.557766	0.218147	-2.55683	0.010563	0.0968067	AAEL025645
LOC5570204	1551.31	-0.257877	0.100871	-2.5565	0.010573	0.0968314	AAEL008164
LOC5564632	134.927	0.608305	0.238006	2.55584	0.0105931	0.0969482	AAEL004350	janus A, putative [Source:VB Community Annotation]
LOC5578510	35.3414	-3.37196	1.31984	-2.55482	0.0106243	0.0971672	AAEL013712	trypsin 5G1 Precursor (EC 3.4.21.4) [Source:VB Community Annotation]
LOC5575914	50585.5	0.480556	0.18812	2.55451	0.0106337	0.0971855	AAEL012175	ATP synthase alpha subunit mitochondrial [Source:VB Community Annotation]
LOC5578803	148.66	-0.732485	0.287108	-2.55125	0.0107336	0.0979198	AAEL020547
LOC5572382	84.9715	-0.785745	0.307993	-2.55117	0.0107361	0.0979198	AAEL020373
LOC5572535	2231.51	-0.510225	0.199997	-2.55117	0.0107362	0.0979198	AAEL009864	Putative conserved secreted protein [Source:UniProtKB/TrEMBL;Acc:A0A0P6IY40]
LOC5566516	87.7627	-0.654201	0.256568	-2.54981	0.0107782	0.0982349	AAEL019553
LOC5569465	119.07	-1.37673	0.540188	-2.54861	0.0108154	0.0985065	AAEL007657	low-density lipoprotein receptor (ldl) [Source:VB Community Annotation]
LOC5568486	75.8684	0.665345	0.261201	2.54725	0.0108576	0.0988225	AAEL006908
LOC5580235	116.287	0.521126	0.204611	2.54691	0.010868	0.098847	AAEL013479
LOC5576042	2057.15	0.447675	0.175788	2.54668	0.0108752	0.098847	AAEL012279	Eukaryotic translation initiation factor 3 subunit J (eIF3j) [Source:VB Community Annotation]
LOC5570308	3.60859	3.36907	1.32327	2.54602	0.0108959	NA	AAEL008251	larval cuticle protein, putative [Source:VB Community Annotation]
LOC5574135	83.2316	-0.847281	0.332888	-2.54525	0.0109201	0.0991868	AAEL019741
LOC5579842	44.1798	-0.96343	0.378559	-2.54499	0.010928	0.0991912	AAEL005855	amino acid transporter [Source:VB Community Annotation]
LOC5564718	37.3842	-0.901	0.354138	-2.54421	0.0109526	0.0993458	AAEL021789
LOC5572282	275.919	-0.429249	0.168751	-2.54368	0.010969	0.0994271	AAEL001782	GPCR Orphan/Putative Class D Family [Source:VB Community Annotation]	GPRNND2
LOC5564580	498.627	-1.10409	0.434099	-2.54341	0.0109775	0.099436	AAEL024425
LOC110678065	5.7218	-2.25928	0.888378	-2.54315	0.0109856	0.0994415	AAEL021204
LOC110681315	660.399	0.543709	0.213931	2.54152	0.0110371	0.0998392	AAEL025388	Superoxide dismutase [Source:UniProtKB/TrEMBL;Acc:Q17BT9]
LOC5565256	250.017	0.513879	0.202282	2.54041	0.0110721	0.100088	AAEL004689
LOC5576861	135.294	-0.893973	0.351936	-2.54016	0.0110803	0.100093	AAEL012840	stathmin [Source:VB Community Annotation]
LOC5568246	3360.43	-0.344317	0.13559	-2.53939	0.0111047	0.100196	AAEL006685	G-protein, gamma-subunit, putative [Source:VB Community Annotation]
LOC5576420	774.698	0.396204	0.156028	2.53932	0.0111069	0.100196	AAEL012507	prefoldin, subunit, putative [Source:VB Community Annotation]
LOC5568814	1179.72	-0.812939	0.320284	-2.53818	0.011143	0.100253	AAEL001194	fatty acid synthase [Source:VB Community Annotation]	FAS1
LOC5576468	88.7133	-0.986757	0.388767	-2.53817	0.0111433	0.100253	AAEL002903	phosphatidylinositol 3-kinase catalytic subunit alpha, beta, delta [Source:VB Community Annotation]	p110
LOC5568461	121.514	-0.606469	0.238941	-2.53815	0.011144	0.100253	AAEL006859	Myb-interacting protein, putative [Source:VB Community Annotation]
LOC5574257	951.708	-0.492395	0.194012	-2.53796	0.01115	0.100253	AAEL011023
LOC5566236	6539.18	0.504957	0.198964	2.53793	0.011151	0.100253	AAEL005269	ubiquinol-cytochrome c reductase complex core protein [Source:VB Community Annotation]
LOC5563913	133.056	0.523253	0.206218	2.53738	0.0111686	0.100343	AAEL003994	phenylalanyl-tRNA synthetase mitochondrial [Source:VB Community Annotation]
LOC5566240	263.561	-0.887454	0.350081	-2.53499	0.0112449	0.10096	AAEL024128
LOC5573382	587.815	-0.451175	0.17804	-2.53412	0.0112729	0.101143	AAEL023675
LOC5573918	6.8942	1.85862	0.733614	2.53351	0.0112926	0.101196	AAEL002187
LOC5571697	137.995	0.517251	0.204181	2.5333	0.0112995	0.101196	AAEL003354
LOC5565499	862.264	-0.736161	0.290632	-2.53296	0.0113102	0.101196	AAEL004805	potassium-dependent sodium-calcium exchanger, putative [Source:VB Community Annotation]
LOC110674866	4.84745	-2.67542	1.05628	-2.53287	0.0113131	0.101196	AAEL022389
LOC5575654	125.223	0.668194	0.263852	2.53246	0.0113266	0.101196	AAEL011973	fumarylacetoacetate hydrolase [Source:VB Community Annotation]
LOC110681189	1115.55	0.324534	0.128151	2.53244	0.0113272	0.101196	AAEL021624
LOC5574653	83.5544	-0.603352	0.238268	-2.53225	0.0113334	0.101196	AAEL011287	ubiquitin specific protease [Source:VB Community Annotation]
LOC5567893	113.139	0.674383	0.266339	2.53205	0.0113399	0.101196	AAEL006338	sulfotransferase (sult) [Source:VB Community Annotation]
LOC5574741	113.918	0.635321	0.251011	2.53105	0.0113722	0.101416	AAEL011379	coenzyme q10 biosynthesis protein [Source:VB Community Annotation]
LOC5572215	71.9499	-0.715613	0.28277	-2.53072	0.0113828	0.101441	AAEL009630	high-affinity cgmp-specific 3,5-cyclic phosphodiesterase [Source:VB Community Annotation]
LOC5570274	424.47	1.10248	0.435731	2.53018	0.0114004	0.10153	AAEL008219	elongase, putative [Source:VB Community Annotation]
LOC5570218	40.8584	-1.19881	0.473928	-2.52952	0.0114218	0.101652	AAEL008153
LOC110678987	122.154	-0.715388	0.282856	-2.52916	0.0114336	0.101689	AAEL024524
LOC110678894	186.704	-0.604798	0.239179	-2.52864	0.0114504	0.10177	AAEL024857
LOC23687431	84.2675	-0.610539	0.241543	-2.52767	0.0114823	0.101985	AAEL023560
LOC5579022	16.1671	1.17124	0.463498	2.52697	0.0115052	0.10212	AAEL013961
LOC5570732	44.0208	-0.811469	0.321155	-2.52672	0.0115134	0.102125	AAEL020636
LOC110680812	28.9799	-2.55516	1.01143	-2.52629	0.0115275	0.102148	AAEL028140
LOC5568975	224.226	-0.416448	0.16486	-2.52607	0.0115346	0.102148	AAEL007256	DNA helicase recq1 [Source:VB Community Annotation]
LOC5568651	144.34	0.746703	0.295667	2.52548	0.011554	0.102148	AAEL006984	cytochrome P450 [Source:VB Community Annotation]	CYP6AG5
LOC110681192	75.2917	0.616467	0.244116	2.52531	0.0115598	0.102148	AAEL021810	mRNA cap guanine-N7 methyltransferase [Source:UniProtKB/TrEMBL;Acc:A0A1S4FUB6]
LOC5575231	75.2917	0.616467	0.244116	2.52531	0.0115598	0.102148	AAEL011698	mRNA (guanine-7-)methyltransferase [Source:VB Community Annotation]
LOC5573728	1285.63	-0.424665	0.168173	-2.52517	0.0115642	0.102148	AAEL010712	low-density lipoprotein receptor (ldl) [Source:VB Community Annotation]
LOC5572885	270.254	0.723156	0.286407	2.52493	0.0115722	0.102148	AAEL026531
LOC5574522	127.772	0.525791	0.208254	2.52476	0.0115778	0.102148	AAEL011198	mitochondrial ribosomal protein, L38, putative [Source:VB Community Annotation]	mRpL38
LOC5566375	529.994	-0.44499	0.1763	-2.52405	0.0116012	0.102234	AAEL005367	myotubularin-related protein 2 [Source:VB Community Annotation]
LOC5575239	135.863	-0.5166	0.204675	-2.524	0.0116029	0.102234	AAEL011714
LOC5564970	308.865	-0.543837	0.215506	-2.52353	0.0116182	0.1023	AAEL004533	GPCR Metabotropic glutamate Family [Source:VB Community Annotation]	GPRMGL2
LOC5567076	169.97	0.503313	0.199512	2.52272	0.0116451	0.102402	AAEL005819	l-allo-threonine aldolase [Source:VB Community Annotation]
LOC5568418	1022.38	0.386383	0.153161	2.52272	0.0116452	0.102402	AAEL006847	Defective in cullin neddylation protein [Source:UniProtKB/TrEMBL;Acc:Q174N9]
LOC5569025	15.7841	2.30393	0.913522	2.52203	0.011668	0.102479	AAEL007314
LOC5570050	6201.04	0.376179	0.14916	2.52199	0.0116694	0.102479	AAEL000185	eukaryotic translation initiation factor [Source:VB Community Annotation]
LOC5577698	1170.79	-0.429181	0.170344	-2.51949	0.0117524	0.103139	AAEL021542
LOC5576168	484.248	-0.341226	0.135465	-2.51892	0.0117717	0.10324	AAEL012360
LOC5577611	1885.3	1.24191	0.493427	2.51691	0.011839	0.103762	AAEL003216
LOC5575441	194.094	0.527098	0.209487	2.51614	0.0118648	0.103851	AAEL002636
LOC5565487	664.875	0.540271	0.214722	2.51614	0.0118649	0.103851	AAEL004823	manganese-iron (Mn-Fe) superoxide dismutase. [Source:VB Community Annotation]	MNSOD1
LOC5574260	639.969	-1.48192	0.58916	-2.51531	0.0118928	0.104024	AAEL028038
LOC5564392	2062.93	0.708053	0.281523	2.51508	0.0119004	0.104024	AAEL004234
LOC5574367	34.6086	-0.964668	0.383712	-2.51404	0.0119356	0.104256	AAEL011085
LOC5573680	31.6888	-1.82821	0.727261	-2.51383	0.0119426	0.104256	AAEL010671	oxidoreductase [Source:VB Community Annotation]
LOC5578376	759.6	-0.295609	0.117618	-2.51331	0.0119606	0.104279	AAEL019481
LOC5572390	85.6814	0.601606	0.23937	2.51329	0.0119611	0.104279	AAEL009779	NBP2b protein, putative [Source:VB Community Annotation]
LOC110675480	3.97658	-2.82914	1.12623	-2.51206	0.0120029	0.104457	AAEL024718
LOC5565610	50.824	-0.884669	0.352173	-2.51203	0.0120039	0.104457	AAEL004881	adam [Source:VB Community Annotation]
LOC5571808	1489.49	-0.841752	0.335093	-2.51199	0.0120051	0.104457	AAEL001680
LOC5571703	329.116	0.488387	0.194467	2.51141	0.0120249	0.104561	AAEL009217	mitochondrial ribosomal protein, S35, putative [Source:VB Community Annotation]	mRpS35
LOC5576383	828.224	-0.30611	0.121936	-2.51041	0.0120592	0.104734	AAEL012475	jnk/sapk-associated protein [Source:VB Community Annotation]
LOC5564556	55774.7	-0.371437	0.147971	-2.51021	0.0120661	0.104734	AAEL004325	60S ribosomal protein L5 [Source:UniProtKB/Swiss-Prot;Acc:Q1HQU2]	RpL5
LOC5576655	36.6604	0.857824	0.341745	2.51013	0.0120686	0.104734	AAEL012679	juvenile hormone-inducible protein, putative [Source:VB Community Annotation]
LOC5564192	25.3795	-1.06818	0.425607	-2.50977	0.012081	0.104774	AAEL014343
LOC5570877	209.535	-0.557246	0.222072	-2.5093	0.0120971	0.104844	AAEL008656	UDP-galactose transporter [Source:VB Community Annotation]
LOC5567998	511.03	-0.477138	0.190216	-2.5084	0.012128	0.105043	AAEL006435	Mevalonate kinase [Source:UniProtKB/TrEMBL;Acc:Q176C1]
LOC5576270	139.974	-0.479373	0.191174	-2.50752	0.012158	0.105235	AAEL012421	cadherin [Source:VB Community Annotation]
LOC110678459	59.6387	1.09005	0.434808	2.50697	0.012177	0.105266	AAEL025137
LOC5566045	98.0528	-0.549704	0.219271	-2.50696	0.0121776	0.105266	AAEL005145
LOC5577588	7.82656	-1.7025	0.67924	-2.50647	0.0121943	0.105342	AAEL013295
LOC5577433	971.023	-0.413065	0.164819	-2.50618	0.0122044	0.105361	AAEL019845
LOC5572284	16013.4	-0.412674	0.164707	-2.50551	0.0122275	0.105485	AAEL001759	40S ribosomal protein S9 [Source:UniProtKB/TrEMBL;Acc:Q1HRP3]	RpS9
LOC5576166	69.4616	0.654148	0.261106	2.5053	0.0122348	0.105485	AAEL012368
LOC5574612	716.023	-0.409914	0.163648	-2.50485	0.0122503	0.105511	AAEL011255	GTP-binding protein-invertebrate [Source:VB Community Annotation]
LOC5573954	701.245	-0.380892	0.152068	-2.50475	0.0122537	0.105511	AAEL002240	signal transducing adapter molecule (stam) [Source:VB Community Annotation]
LOC5567877	36.063	1.22304	0.488401	2.50417	0.0122741	0.105579	AAEL006347	Apyrase Precursor (EC 3.6.1.5)(Adenosine diphosphatase)(ATP-diphosphohydrolase)(ATP-diphosphatase)(ADPase)(Allergen Aed a 1) [Source:VB Community Annotation]	APY
LOC5571052	268.792	-1.52662	0.609657	-2.50406	0.0122777	0.105579	AAEL017356
LOC5565657	193.639	0.590991	0.236052	2.50365	0.012292	0.105579	AAEL004914
LOC5564754	37.0585	1.80533	0.721093	2.50361	0.0122935	0.105579	AAEL026665
LOC5577987	50.8107	0.758634	0.303115	2.50279	0.0123217	0.105712	AAEL003394
LOC23687882	1778.78	-0.30418	0.121541	-2.5027	0.012325	0.105712	AAEL017462
LOC5573416	123.361	-1.88785	0.754439	-2.50233	0.012338	0.105756	AAEL002056	Cytoplasmic tRNA 2-thiolation protein 2 [Source:VB Community Annotation]
LOC5580160	181.972	-0.790497	0.315946	-2.502	0.0123494	0.105785	AAEL011397
LOC110674451	2.60075	3.77978	1.51172	2.50031	0.0124085	NA	AAEL020331
LOC5572646	913.026	-0.448926	0.179561	-2.50013	0.0124148	0.106276	AAEL001847
LOC110675623	79.9502	1.44974	0.580036	2.4994	0.0124403	0.106426	AAEL023480
LOC5575170	8.02782	-1.7588	0.703938	-2.49852	0.0124713	0.106565	AAEL000312
LOC5570968	197.566	-0.504628	0.201974	-2.49848	0.0124727	0.106565	AAEL008700
LOC110678842	37.6548	-1.18589	0.474701	-2.49819	0.0124828	0.10658	AAEL025566
LOC5570984	41.0077	1.32938	0.532228	2.49776	0.012498	0.10658	AAEL020513
LOC5568779	80.8669	1.03294	0.41355	2.49775	0.0124985	0.10658	AAEL007126	sugar transporter [Source:VB Community Annotation]
LOC5568136	25.9829	1.57482	0.630615	2.49728	0.012515	0.106651	AAEL006568	serine protease [Source:VB Community Annotation]
LOC5573544	27.7308	-1.04572	0.418854	-2.49662	0.0125384	0.106782	AAEL010593
LOC5565753	451.167	-1.62112	0.649747	-2.495	0.0125958	0.107202	AAEL014964
LOC5576668	265.97	-0.471439	0.189056	-2.49365	0.0126436	0.107539	AAEL019875
LOC5576784	27.2317	1.29745	0.520613	2.49215	0.0126972	0.107926	AAEL012764
LOC110679152	20.9706	1.55813	0.625296	2.49183	0.0127086	0.107954	AAEL023607
LOC5579150	57.811	0.70043	0.281133	2.49145	0.0127221	0.108	AAEL014024
LOC5571712	711.061	0.987584	0.396449	2.49107	0.0127358	0.108029	AAEL009244	serine-type enodpeptidase, [Source:VB Community Annotation]
LOC5574001	173.748	0.425776	0.170933	2.4909	0.012742	0.108029	AAEL010831
LOC5567511	26.3508	-0.936472	0.375991	-2.49067	0.0127501	0.108029	AAEL024136
LOC5569810	491.926	0.836762	0.336006	2.49032	0.0127629	0.108042	AAEL001306
LOC5570171	728.839	-0.345822	0.138887	-2.48995	0.012776	0.108042	AAEL008138	ABC transporter [Source:VB Community Annotation]
LOC5571205	90.4756	0.547331	0.219827	2.48982	0.0127808	0.108042	AAEL008901
LOC5572168	112.899	-0.724712	0.291081	-2.48972	0.0127842	0.108042	AAEL009584	elg, drosophila [Source:VB Community Annotation]
LOC5577143	17500.4	-0.66758	0.268179	-2.48931	0.0127992	0.10806	AAEL003116	phosrestin i (arrestin b) (arrestin 2) [Source:VB Community Annotation]
LOC5569074	1263.71	0.620163	0.24914	2.48921	0.0128027	0.10806	AAEL001210	NADH ubiquinone oxidoreductase subunit, putative [Source:VB Community Annotation]
LOC5567144	1375.22	-0.376133	0.15115	-2.48847	0.0128294	0.108217	AAEL024796
LOC5572074	665.377	0.387024	0.155573	2.48774	0.0128559	0.108326	AAEL001725
LOC5578178	116.992	0.52202	0.209862	2.48744	0.0128665	0.108326	AAEL013790	mitochondrial ribosomal protein, L50 [Source:VB Community Annotation]	mRpL50
LOC110676077	13.0393	1.32184	0.531409	2.48743	0.012867	0.108326	AAEL020681
LOC5578675	1166.01	-1.39988	0.5633	-2.48513	0.0129503	0.108958	AAEL003618	sodium/chloride dependent amino acid transporter [Source:VB Community Annotation]
LOC110675217	5.11288	-4.80735	1.93484	-2.48463	0.0129686	0.109043	AAEL027468
LOC5564251	285.997	-0.576082	0.231887	-2.48432	0.0129798	0.109068	AAEL019821
LOC5574671	216.407	-0.612638	0.246627	-2.48406	0.0129893	0.109078	AAEL011316	zinc finger protein [Source:VB Community Annotation]
LOC5574247	100.37	-0.611638	0.246271	-2.4836	0.0130063	0.109152	AAEL023646
LOC5573538	36.658	0.88439	0.356153	2.48317	0.0130218	0.109197	AAEL010582	glutathione transferase [Source:VB Community Annotation]	GSTD11
LOC5574993	18926	-0.430761	0.173484	-2.483	0.0130281	0.109197	AAEL025362	60S ribosomal protein L10 [Source:UniProtKB/TrEMBL;Acc:Q1HRT6]
LOC5577339	91.9008	-0.617242	0.248669	-2.48218	0.013058	0.109379	AAEL000429
LOC5571896	452.98	-0.380495	0.153329	-2.48156	0.0130809	0.109501	AAEL009372
LOC5565386	143.392	0.516609	0.208221	2.48106	0.0130993	0.109529	AAEL004757	cleavage and polyadenylation specificity factor [Source:VB Community Annotation]
LOC5564494	8.18479	-2.8843	1.16255	-2.48102	0.0131008	0.109529	AAEL004303
LOC5569872	309.815	-2.43059	0.980031	-2.48011	0.0131341	0.10968	AAEL025229
LOC5575820	77.7989	0.711628	0.286938	2.48008	0.0131354	0.10968	AAEL012093	leucine-rich transmembrane protein [Source:VB Community Annotation]
LOC5572425	39.6042	-1.1269	0.454529	-2.47928	0.0131649	0.109813	AAEL023558
LOC5563584	11.6692	-1.45592	0.587255	-2.4792	0.0131679	0.109813	AAEL019508
LOC5570371	793.92	-1.67096	0.674117	-2.47873	0.013185	0.109886	AAEL008269
LOC5568302	5333.48	-0.59631	0.240782	-2.47656	0.0132655	0.11047	AAEL006741
LOC5573581	67.8349	0.77471	0.312847	2.47632	0.0132745	0.11047	AAEL002107	sulfide quinone reductase [Source:VB Community Annotation]
LOC5573098	40.8438	-1.11549	0.450492	-2.47617	0.0132801	0.11047	AAEL023632
LOC5570160	203.753	-0.93808	0.378912	-2.47572	0.0132969	0.11054	AAEL024736
LOC5567988	888.92	0.357472	0.14444	2.47488	0.0133281	0.11073	AAEL006436	phosphorylase b kinase beta, kpbb [Source:VB Community Annotation]
LOC110675531	23.9666	1.50729	0.609228	2.47409	0.0133574	0.110904	AAEL024237
LOC5572453	191.152	-1.06046	0.428806	-2.47306	0.0133961	0.111156	AAEL001813	sodium/solute symporter [Source:VB Community Annotation]
LOC5574291	107.319	0.650704	0.263329	2.47107	0.0134711	0.111708	AAEL011054
LOC5579830	268.671	0.431341	0.174601	2.47044	0.0134948	0.111778	AAEL005857
LOC5577024	91.7303	-0.786055	0.31819	-2.47039	0.0134964	0.111778	AAEL025729
LOC5575934	392.177	-0.360532	0.145976	-2.4698	0.0135187	0.111893	AAEL009677	membrane-associated protein gex-3 [Source:VB Community Annotation]
LOC110679059	4.78931	-2.27691	0.922266	-2.46882	0.013556	0.112073	AAEL025879
LOC5570176	116.121	-0.586673	0.237637	-2.46878	0.0135575	0.112073	AAEL024563
LOC5577191	1232.44	-0.473211	0.191756	-2.46778	0.0135954	0.11228	AAEL013076	signal recognition particle 54 kda protein [Source:VB Community Annotation]
LOC5563958	203.059	-2.41088	0.976987	-2.46767	0.0135995	0.11228	AAEL004009	glucose dehydrogenase [Source:VB Community Annotation]
LOC110679355	9.76516	1.65032	0.669125	2.46639	0.0136482	0.112612	AAEL026211
LOC110677673	2.1327	-4.56336	1.85058	-2.46591	0.0136666	NA	AAEL024985
LOC110679181	23.7103	1.10484	0.448162	2.46526	0.0136912	0.112868	AAEL025896
LOC110679268	4.82864	3.04597	1.23562	2.46513	0.0136962	0.112868	AAEL027698
LOC5577034	14719.7	-0.383474	0.155605	-2.4644	0.0137243	0.113029	AAEL012944	60S ribosomal protein L11 [Source:UniProtKB/TrEMBL;Acc:Q16KL2]	RpL11
LOC5578832	344.526	0.561005	0.227933	2.46127	0.0138448	0.113951	AAEL013871
LOC5575994	143.278	-0.790528	0.321244	-2.46083	0.0138614	0.114017	AAEL023229
LOC5568780	648.501	0.833206	0.338698	2.46003	0.0138927	0.114203	AAEL007136	sugar transporter [Source:VB Community Annotation]
LOC5576487	110.001	0.499751	0.203416	2.4568	0.0140182	0.115155	AAEL002912	Probable cytosolic iron-sulfur protein assembly protein Ciao1 [Source:VB Community Annotation]	ciao1
LOC5568668	1398.47	-0.371366	0.151172	-2.45658	0.0140268	0.115155	AAEL007022	tfiia large subunit [Source:VB Community Annotation]
LOC110676962	3.90813	-4.38069	1.78339	-2.45638	0.0140346	0.115155	AAEL026058
LOC5564796	96.4398	-0.621114	0.252926	-2.45571	0.0140607	0.115297	AAEL004437	dual-specificity protein phosphatase, putative [Source:VB Community Annotation]
LOC5577310	8.3912	-1.86968	0.761744	-2.45448	0.014109	0.115622	AAEL019790
LOC5574553	46.5575	-1.47829	0.60236	-2.45416	0.0141213	0.115651	AAEL011227
LOC5568635	36.3697	-0.929421	0.378792	-2.45365	0.0141416	0.115708	AAEL006987
LOC110676361	11.9773	-1.57084	0.640232	-2.45354	0.0141456	0.115708	AAEL026612
LOC5570813	25.4946	-1.19155	0.48571	-2.45322	0.0141585	0.115741	AAEL024756
LOC5568029	38.6099	0.987515	0.402909	2.45096	0.0142476	0.116398	AAEL006454	odorant binding protein (OBP1) [Source:VB Community Annotation]	OBP1
LOC5578124	7315.08	0.76163	0.310964	2.44926	0.0143152	0.116844	AAEL003419
LOC110675601	83.2921	-0.742149	0.303025	-2.44914	0.0143198	0.116844	AAEL025376
LOC5571643	63.3715	0.631359	0.257907	2.44801	0.0143647	0.117138	AAEL001653	fetal globin-inducing factor [Source:VB Community Annotation]
LOC23687932	677.207	0.574183	0.234625	2.44724	0.0143955	0.117269	AAEL017512
LOC110677938	48.4009	-1.30022	0.531341	-2.44705	0.0144033	0.117269	AAEL020028
LOC5574316	1268.47	-0.451632	0.18457	-2.44694	0.0144073	0.117269	AAEL002357
LOC5573292	283.251	0.443767	0.181466	2.44546	0.0144668	0.11768	AAEL010371	autotransporter adhesin precursor, putative [Source:VB Community Annotation]
LOC5577102	27.3282	-0.852037	0.348471	-2.44507	0.0144824	0.117735	AAEL018251
LOC110679439	11.7889	1.29979	0.53166	2.44477	0.0144943	0.117759	AAEL020802
LOC5569921	530.023	-0.568922	0.232765	-2.44419	0.0145179	0.117879	AAEL008021	specifically Rac-associated protein, putative [Source:VB Community Annotation]
LOC110675410	15.5776	3.39521	1.38927	2.44388	0.0145303	0.117907	AAEL025083
LOC5567079	105.859	-0.600085	0.245874	-2.44062	0.0146623	0.118905	AAEL019781
LOC5580072	86.5303	0.524593	0.215008	2.43988	0.0146922	0.119075	AAEL002139
LOC5569388	1029.35	-3.68102	1.50897	-2.43942	0.0147108	0.119106	AAEL007579
LOC5570622	233.907	1.57191	0.6444	2.43934	0.0147139	0.119106	AAEL008428
LOC5577615	62.1602	1.0034	0.411386	2.43906	0.0147255	0.119126	AAEL028088
LOC5564068	3525.86	-0.905896	0.37155	-2.43815	0.0147625	0.119353	AAEL025030
LOC5578914	60.8377	-1.70917	0.701664	-2.43588	0.0148555	0.119994	AAEL003742	glucosylceramidase [Source:VB Community Annotation]
LOC5568117	37.8373	0.956293	0.392603	2.43577	0.0148599	0.119994	AAEL006563	Vitellogenic carboxypeptidase Precursor (EC 3.4.16.-) [Source:VB Community Annotation]	Vcp
LOC5573182	256.088	0.486769	0.199991	2.43396	0.0149347	0.120525	AAEL001972	TATA box binding protein (TBP)-associated factor,, putative [Source:VB Community Annotation]
LOC110676337	11.2915	-1.51067	0.620732	-2.43369	0.0149456	0.120539	AAEL027550
LOC5579926	24.3973	1.05515	0.433627	2.43331	0.0149615	0.120593	AAEL006795	cytochrome P450 [Source:VB Community Annotation]	CYP9J15
LOC5567125	117.844	0.545468	0.224233	2.43259	0.0149913	0.12076	AAEL005882
LOC110678059	434.023	0.625009	0.257013	2.43182	0.0150233	0.120945	AAEL009660
LOC5572351	269.849	-0.822069	0.338118	-2.43131	0.0150443	0.120982	AAEL014519	cbl-d [Source:VB Community Annotation]
LOC5566784	573.608	-0.339042	0.139451	-2.43126	0.0150462	0.120982	AAEL015255	phosphatidylinositol-4-phosphate 5-kinase type i [Source:VB Community Annotation]
LOC5570011	85.7864	-0.60816	0.250206	-2.43064	0.0150721	0.121117	AAEL000170
LOC5572545	148.302	-0.561081	0.230871	-2.43028	0.015087	0.121163	AAEL009871	80 kda MCM3-associated protein [Source:VB Community Annotation]
LOC5573138	4649.83	0.583719	0.240236	2.42978	0.0151081	0.121176	AAEL001969	protein serine/threonine kinase, putative [Source:VB Community Annotation]
LOC5565051	514.29	0.321749	0.13242	2.42977	0.0151084	0.121176	AAEL004563	26S protease regulatory subunit S10b [Source:VB Community Annotation]
LOC5576794	54.3174	-1.26731	0.52166	-2.42938	0.0151248	0.121176	AAEL012777	serine protease snake, putative [Source:VB Community Annotation]
LOC5576108	113.013	-1.28306	0.528146	-2.42937	0.0151252	0.121176	AAEL002800	DNA polymerase epsilon, catalytic subunit [Source:VB Community Annotation]
LOC5566914	382.85	-0.385893	0.158867	-2.42903	0.0151394	0.121216	AAEL005704
LOC110676003	1.74311	-4.26651	1.75741	-2.42773	0.0151936	NA	AAEL021500
LOC5568395	90.1871	0.675046	0.278075	2.42757	0.0152005	0.121632	AAEL006779	cytochrome c oxidase assembly protein cox11 [Source:VB Community Annotation]
LOC110675851	5.59418	2.27515	0.937659	2.42642	0.0152488	0.121944	AAEL020223
LOC110676831	16345	-0.42221	0.174092	-2.42521	0.0152995	0.122226	AAEL025362	60S ribosomal protein L10 [Source:UniProtKB/TrEMBL;Acc:Q1HRT6]
LOC5577107	314.5	0.362096	0.149309	2.42514	0.0153024	0.122226	AAEL013002	cdk9 [Source:VB Community Annotation]
LOC5568521	5702.65	0.530295	0.21875	2.4242	0.015342	0.122464	AAEL006928	dihydrolipoamide dehydrogenase [Source:VB Community Annotation]
LOC5575423	101.529	-0.690171	0.284725	-2.424	0.0153508	0.122464	AAEL011827	Nucleolar complex protein 3 homolog [Source:UniProtKB/TrEMBL;Acc:Q16NX8]
LOC5571618	983.279	-0.723396	0.298486	-2.42355	0.0153697	0.122541	AAEL009204	glucose dehydrogenase [Source:VB Community Annotation]
LOC5572410	7.34012	2.02366	0.835207	2.42294	0.0153953	0.122671	AAEL009807	cuticle protein, putative [Source:VB Community Annotation]
LOC110678406	9.67934	1.61416	0.666403	2.42221	0.0154266	0.122847	AAEL020137
LOC5570241	431.658	0.585673	0.241912	2.42102	0.0154771	0.123175	AAEL008190	bhlh factor math6 (atoh8 protein) (bhlh transcription factor) [Source:VB Community Annotation]
LOC110680366	4.13182	-2.39926	0.991385	-2.42011	0.0155157	0.123408	AAEL025834
LOC5577315	143.882	1.70902	0.706417	2.41928	0.0155515	0.123613	AAEL013169
LOC5563673	581.416	-0.576525	0.238325	-2.41907	0.0155602	0.123613	AAEL000541	fasciclin, putative [Source:VB Community Annotation]
LOC110677746	2.12156	-4.53906	1.87677	-2.41856	0.0155822	NA	AAEL021740
LOC5573765	6.47723	-1.99246	0.824207	-2.41743	0.0156307	0.124051	AAEL000266	GPCR Orphan/Putative Class A Family [Source:VB Community Annotation]	GPRNNA21
LOC110674588	13.8129	1.30998	0.541907	2.41735	0.015634	0.124051	AAEL028204
LOC5567973	79.59	0.620861	0.257077	2.41508	0.0157319	0.124753	AAEL006401	mitosis protein dim1 [Source:VB Community Annotation]
LOC110675357	2.51325	-3.74734	1.55184	-2.41476	0.0157454	NA	AAEL024970
LOC5566254	355.241	-0.471963	0.195494	-2.4142	0.0157697	0.124875	AAEL005285
LOC5565245	82.522	-0.873348	0.361756	-2.41419	0.0157701	0.124875	AAEL014767
LOC110679290	19.99	1.49943	0.621121	2.41406	0.0157757	0.124875	AAEL025399
LOC110678545	3.77966	-3.40451	1.41041	-2.41385	0.0157849	0.124875	AAEL022165
LOC5573318	6.70103	-2.02491	0.83956	-2.41187	0.015871	0.125481	AAEL010413	Cak1 [Source:UniProtKB/TrEMBL;Acc:A0A1S4FQ70]
LOC5575613	24.9377	-2.13159	0.883948	-2.41144	0.0158896	0.125519	AAEL011944	carboxy/choline esterase Alpha Esterase [Source:VB Community Annotation]	CCEAE3O
LOC5567273	93.0317	-0.84961	0.352342	-2.41132	0.0158948	0.125519	AAEL005915	monocarboxylate transporter [Source:VB Community Annotation]
LOC5573240	31.3012	-0.805253	0.334072	-2.41041	0.0159344	0.125757	AAEL011858	transcription factor IIIA, putative [Source:VB Community Annotation]
LOC5563931	1804.12	1.2421	0.51556	2.40922	0.0159867	0.126094	AAEL021056
LOC110675503	10.3432	-3.29771	1.36905	-2.40876	0.016007	0.126179	AAEL020037
LOC110675493	13944.8	-0.446103	0.185218	-2.40854	0.0160166	0.12618	AAEL028043	60S ribosomal protein L28, putative [Source:UniProtKB/TrEMBL;Acc:Q1HRJ1]
LOC5565055	2212.5	-0.342474	0.142242	-2.40768	0.0160542	0.1264	AAEL004559	synaptosomal associated protein [Source:VB Community Annotation]
LOC5570918	1128.97	-2.65679	1.10421	-2.40606	0.0161256	0.126866	AAEL001498
LOC5568640	59.8001	0.734652	0.305354	2.40591	0.0161324	0.126866	AAEL007006	Clip-Domain Serine Protease family A. [Source:VB Community Annotation]	CLIPA17
LOC5574565	86.9876	0.558143	0.232022	2.40557	0.0161475	0.126909	AAEL027434
LOC5574828	437.213	-0.408669	0.169935	-2.40486	0.0161786	0.127078	AAEL011441	calcium/calmodulin-dependent protein kinase type 1 (camki) [Source:VB Community Annotation]
LOC5578102	66.9917	-1.40515	0.584391	-2.40446	0.0161962	0.127141	AAEL003406
LOC110679436	5908.21	-0.825288	0.343269	-2.4042	0.0162079	0.127157	AAEL027405
LOC5578247	13.6458	-1.67014	0.694972	-2.40318	0.0162531	0.127369	AAEL013580
LOC5577083	125.826	0.474769	0.197561	2.40316	0.0162542	0.127369	AAEL012973	uracil phosphoribosyltransferase [Source:VB Community Annotation]
LOC5566259	13.798	1.22171	0.508613	2.40204	0.016304	0.127684	AAEL015113	prophenoloxidase [Source:VB Community Annotation]
LOC5564170	19.5592	-1.09511	0.456033	-2.40138	0.0163332	0.127838	AAEL004136
LOC110675101	198.052	1.81819	0.757332	2.40079	0.0163599	0.127965	AAEL025320
LOC5572818	122.707	-0.583701	0.243149	-2.40058	0.0163689	0.127965	AAEL001879
LOC110675468	34.8859	1.31122	0.546267	2.40034	0.01638	0.127977	AAEL024835
LOC5580173	154279	0.46443	0.193559	2.39942	0.0164212	0.128152	AAEL002572	myosin regulatory light chain 2 (mlc-2) [Source:VB Community Annotation]
LOC5569507	21.9049	-1.0254	0.427356	-2.3994	0.0164218	0.128152	AAEL007684	tektin, putative [Source:VB Community Annotation]
LOC5572188	111.68	-0.568189	0.236873	-2.3987	0.0164532	0.128268	AAEL009596	sterol o-acyltransferase [Source:VB Community Annotation]
LOC110676008	7.72395	-2.49127	1.03862	-2.39864	0.0164561	0.128268	AAEL027488
LOC5578590	43.6308	1.48443	0.619031	2.398	0.016485	0.128418	AAEL013774
LOC5572455	47.4754	-2.34729	0.979107	-2.39737	0.0165131	0.128561	AAEL001836	odorant-binding protein 56a, putative [Source:VB Community Annotation]
LOC5570576	54.5834	-1.01436	0.423197	-2.3969	0.0165345	0.128581	AAEL008377
LOC5579127	63.1449	-0.954108	0.398061	-2.39689	0.016535	0.128581	AAEL003853	nephrin [Source:VB Community Annotation]
LOC110679366	2.40981	-3.66931	1.53153	-2.39585	0.016582	NA	AAEL025024
LOC5566855	96.2518	1.71754	0.717011	2.39542	0.0166015	0.129022	AAEL000820	dimethylaniline monooxygenase [Source:VB Community Annotation]
LOC5571443	10.0255	4.69242	1.95953	2.39467	0.0166355	0.129211	AAEL009081
LOC5565702	1657.25	0.36815	0.153817	2.39343	0.0166917	0.129571	AAEL014943
LOC110681240	9.9365	1.88803	0.789439	2.39161	0.0167745	0.130138	AAEL025230
LOC5565057	86.422	-2.15142	0.899764	-2.39109	0.0167985	0.130225	AAEL027515
LOC5574237	1436.42	0.315889	0.132133	2.39068	0.0168171	0.130225	AAEL011006	guanylate kinase [Source:VB Community Annotation]
LOC110676961	12.5165	-1.54433	0.646005	-2.39059	0.0168214	0.130225	AAEL024554
LOC5564903	7612.43	0.832036	0.348058	2.39051	0.0168252	0.130225	AAEL018159
LOC5565645	8674.28	0.393968	0.164857	2.38975	0.0168596	0.130416	AAEL004897	brain chitinase and chia [Source:VB Community Annotation]
LOC23687733	106.743	-0.590006	0.246927	-2.3894	0.0168759	0.130466	AAEL019608	G-protein coupled receptor [Source:UniProtKB/TrEMBL;Acc:A0A411JKB1]
LOC5576802	70.2837	0.897461	0.375663	2.38901	0.0168939	0.130528	AAEL018249
LOC5580314	32.9324	1.20193	0.503316	2.38802	0.0169394	0.130804	AAEL012901
LOC5578922	41.7594	1.39947	0.586177	2.38745	0.0169657	0.130931	AAEL003764
LOC5565058	23.3371	1.05922	0.443761	2.38692	0.0169902	0.131043	AAEL004573	delta(9)-desaturase 2, putative [Source:VB Community Annotation]
LOC5569798	157.898	0.474619	0.198873	2.38655	0.0170075	0.1311	AAEL001314
LOC5575344	1581.46	0.636148	0.266832	2.38407	0.0171223	0.131908	AAEL002591	odorant binding protein OBP13 [Source:VB Community Annotation]	OBP13
LOC5575872	333.355	-0.363882	0.152677	-2.38334	0.0171562	0.132093	AAEL012138	24-dehydrocholesterol reductase [Source:VB Community Annotation]
LOC110678082	4.72243	2.68911	1.12871	2.38246	0.0171972	0.132332	AAEL027516
LOC5568305	665.064	-0.56424	0.236925	-2.38151	0.0172418	0.132598	AAEL006723
LOC5574656	333.949	0.449463	0.188777	2.38091	0.0172697	0.132735	AAEL011295
LOC5565694	15.288	1.50241	0.631117	2.38056	0.0172864	0.132787	AAEL004923	Nicotinic acetylcholine receptor, putative [Source:UniProtKB/TrEMBL;Acc:A0A1S4F9A7]
LOC110679172	47.0336	-0.933888	0.39244	-2.3797	0.0173268	0.13302	AAEL022514
LOC110677209	3.48768	3.27764	1.37738	2.37961	0.017331	NA	AAEL024019
LOC5572069	14.0039	-1.16407	0.489222	-2.37943	0.0173394	0.133039	AAEL027566
LOC5569732	26.8263	-1.67386	0.7037	-2.37865	0.0173762	0.133245	AAEL007878	ornithine decarboxylase [Source:VB Community Annotation]
LOC110675371	51.4312	-0.766777	0.322462	-2.37788	0.0174123	0.133444	AAEL027353
LOC5572598	36.7685	-0.840116	0.353404	-2.37721	0.0174441	0.13361	AAEL024775
LOC110677229	45.6801	-0.659818	0.277596	-2.3769	0.017459	0.133647	AAEL022094
LOC5575658	5.1872	3.23819	1.36253	2.3766	0.0174731	0.133678	AAEL002693	venom allergen [Source:VB Community Annotation]
LOC110678979	8.81187	-2.32512	0.978531	-2.37614	0.0174949	0.133768	AAEL026887
LOC110676916	54.4624	0.63378	0.266879	2.37478	0.0175594	0.134183	AAEL022985
LOC5577938	649.447	-0.412031	0.173549	-2.37415	0.0175893	0.134228	AAEL013424
LOC110678574	5426.26	0.608079	0.25614	2.37401	0.0175962	0.134228	AAEL020811
LOC5568189	129.692	-0.689137	0.290301	-2.37387	0.0176028	0.134228	AAEL019764
LOC5579990	882.966	0.292807	0.123358	2.37363	0.0176142	0.134228	AAEL001742
LOC110680640	25.2854	-7.14152	3.00874	-2.37359	0.017616	0.134228	AAEL027222
LOC110681033	497.902	0.469289	0.197749	2.37316	0.0176367	0.134309	AAEL027639
LOC110677858	35.9755	1.06366	0.44832	2.37254	0.0176663	0.134457	AAEL025812
LOC5571166	160.134	0.415959	0.175398	2.37151	0.0177156	0.134754	AAEL025249
LOC5563617	16.3719	1.23287	0.520077	2.37055	0.0177615	0.135016	AAEL015430	Clip-Domain Serine Protease family B. Protease homologue. [Source:VB Community Annotation]	CLIPB19
LOC5572207	72.6638	0.658766	0.27793	2.37026	0.0177757	0.135016	AAEL022010
LOC5574962	276.634	0.465648	0.196463	2.37016	0.0177806	0.135016	AAEL011562	caspase (long) [Source:VB Community Annotation]	Dronc
LOC110681494	5852.35	0.470798	0.198687	2.36954	0.0178101	0.135163
LOC5569870	122.558	0.47031	0.198615	2.36794	0.0178874	0.135492	AAEL007975
LOC5568387	159.274	0.68675	0.290033	2.36783	0.0178927	0.135492	AAEL006771
LOC5565549	940.587	-0.643582	0.271805	-2.36781	0.0178938	0.135492	AAEL004859	ATP-dependent RNA helicase [Source:VB Community Annotation]
LOC5564592	90.028	-0.760627	0.321251	-2.3677	0.0178989	0.135492	AAEL004332
LOC110678859	270.515	0.366838	0.154942	2.36758	0.0179047	0.135492	AAEL022213	26S proteasome non-ATPase regulatory subunit [Source:UniProtKB/TrEMBL;Acc:A0A1S4FP45]
LOC5567791	85.3695	0.977157	0.412836	2.36694	0.017936	0.135652	AAEL018110
LOC5571601	312.428	-2.73308	1.15497	-2.36636	0.0179642	0.135787	AAEL009184
LOC5574995	277.172	0.487997	0.206357	2.36482	0.0180387	0.136148	AAEL002523	mitochondrial inner membrane protein translocase, 9kD-subunit, putative [Source:VB Community Annotation]
LOC23687500	20.0745	1.34377	0.568273	2.36466	0.0180465	0.136148	AAEL017080
LOC5568874	685.825	-0.443836	0.187708	-2.3645	0.0180547	0.136148	AAEL024852
LOC5578152	71.5223	-0.635583	0.268804	-2.36448	0.0180553	0.136148	AAEL013540
LOC110680300	9.59123	-1.38334	0.58513	-2.36416	0.0180712	0.136148	AAEL026650
LOC110676540	35.0854	-1.17078	0.495232	-2.36411	0.0180736	0.136148	AAEL025740
LOC5570364	25.733	1.13695	0.481042	2.36351	0.0181026	0.136289	AAEL008271	SEC14, putative [Source:VB Community Annotation]
LOC110676099	38.1069	-0.760053	0.321669	-2.36284	0.0181355	0.13643	AAEL024199
LOC5564111	18.4925	-2.43123	1.02911	-2.36245	0.0181545	0.13643	AAEL004103	deoxyribonuclease I, putative [Source:VB Community Annotation]
LOC110679400	4.99845	-2.66856	1.12965	-2.3623	0.0181621	0.13643	AAEL021710
LOC5566117	32.688	1.35815	0.574928	2.36229	0.0181626	0.13643	AAEL021180
LOC5573286	433.53	-0.402448	0.170381	-2.36204	0.0181745	0.136443	AAEL022692
LOC110679008	4.25432	2.45119	1.03799	2.36148	0.0182023	0.136574	AAEL021289
LOC5573727	29.1691	-0.87866	0.372222	-2.36058	0.0182464	0.136827	AAEL010710	gamma-aminobutyric-acid receptor a beta subunit 1, 2, 3, [Source:VB Community Annotation]
LOC5572004	336.447	-0.832146	0.352625	-2.35986	0.0182819	0.137016	AAEL009477
LOC110680452	72.4924	-0.562475	0.238427	-2.35911	0.018319	0.137216	AAEL024321
LOC5574210	37.3485	-0.810136	0.343457	-2.35877	0.0183356	0.137263	AAEL002317	Insulin-like receptor Precursor (MIR)(EC 2.7.10.1) [Source:VB Community Annotation]	InR
LOC5578870	13.3913	1.22051	0.51756	2.3582	0.0183638	0.137396	AAEL003738
LOC5575714	831.704	0.367267	0.155819	2.35701	0.0184228	0.137738	AAEL012023
LOC5575961	12.9186	2.31106	0.980586	2.35681	0.0184326	0.137738	AAEL012199	lipase 1 precursor [Source:VB Community Annotation]
LOC5565618	750.752	-0.370265	0.157115	-2.35665	0.0184406	0.137738	AAEL021782
LOC5580329	19224.7	-0.516869	0.219362	-2.35623	0.0184614	0.137809	AAEL013069	guanine nucleotide-binding protein subunit beta-like protein [Source:VB Community Annotation]	Rack1
LOC5571004	30.6779	1.07914	0.458033	2.35604	0.018471	0.137809	AAEL022074
LOC110675489	4.24324	2.4879	1.05609	2.35577	0.0184843	0.137831	AAEL026795
LOC5578314	111.82	-0.467785	0.198625	-2.35511	0.0185173	0.137999	AAEL013624
LOC5576586	6.89863	2.42922	1.03185	2.35423	0.0185613	0.138249	AAEL019831
LOC5571809	56.5956	0.721814	0.306674	2.35369	0.0185882	0.138372	AAEL001682	nuclear movement protein nudc [Source:VB Community Annotation]
LOC5571466	2986.33	-0.408387	0.173579	-2.35274	0.0186356	0.138647	AAEL009101	Eukaryotic translation initiation factor 3 subunit F (eIF3f)(Eukaryotic translation initiation factor 3 subunit 5) [Source:VB Community Annotation]	eIF3-S5
LOC5574872	137.411	0.429995	0.182825	2.35195	0.0186755	0.138791	AAEL011476
LOC5570914	2142.86	0.349005	0.148391	2.35193	0.0186762	0.138791	AAEL001479	protoheme ix farnesyltransferase [Source:VB Community Annotation]
LOC110679072	22.8606	1.02849	0.437335	2.35173	0.0186864	0.138791	AAEL028086
LOC5577452	24.8246	0.97352	0.414057	2.35117	0.0187144	0.138882	AAEL013191
LOC23687846	9.73884	-1.56068	0.663816	-2.35107	0.0187197	0.138882	AAEL025910
LOC110675281	7.08688	2.15946	0.918733	2.35048	0.0187491	0.138987	AAEL025898
LOC5567900	49.1105	0.680729	0.289626	2.35037	0.0187547	0.138987	AAEL006355	Class C Scavenger Receptor (Sushi/SCR/CCP MAM and Somatomedin B domains). [Source:VB Community Annotation]	SCRC1
LOC5566450	366.821	0.439224	0.186907	2.34996	0.0187754	0.139014	AAEL005391	syntenin [Source:VB Community Annotation]
LOC5564965	95.6914	0.743328	0.316326	2.34988	0.0187795	0.139014	AAEL019876
LOC5576466	203.534	-0.51761	0.220365	-2.34888	0.0188302	0.13928	AAEL002888	williams-beuren syndrome critical region protein [Source:VB Community Annotation]
LOC5577042	2821.18	-0.644894	0.274569	-2.34875	0.0188364	0.13928	AAEL012964
LOC5570587	178.068	0.47889	0.203988	2.34764	0.0188927	0.139618	AAEL008397	Glutathione peroxidase [Source:UniProtKB/TrEMBL;Acc:Q5K6H6]	GPXH2
LOC110676516	2.55065	-3.76344	1.60392	-2.34639	0.0189561	NA	AAEL020272
LOC5568940	2556.85	0.355729	0.151618	2.34622	0.0189649	0.140074	AAEL007236
LOC5568942	233.882	0.544367	0.232102	2.34538	0.0190077	0.140312	AAEL007226	nidogen [Source:VB Community Annotation]
LOC5576864	711.916	1.21799	0.519476	2.34466	0.0190444	0.140504	AAEL012845	Mitochondrial import inner membrane translocase subunit TIM44 [Source:UniProtKB/TrEMBL;Acc:Q16KX3]
LOC110675609	238.248	0.888986	0.379217	2.34427	0.0190644	0.140573	AAEL021795
LOC5575289	53.3353	0.660031	0.28172	2.34286	0.0191367	0.141028	AAEL011748
LOC5570289	137.001	0.451965	0.192945	2.34246	0.0191573	0.141101	AAEL008228	small nuclear ribonucleoprotein, core, putative [Source:VB Community Annotation]
LOC5579202	1502.54	0.597364	0.255131	2.3414	0.0192114	0.141421	AAEL021395
LOC5570134	583.369	0.459518	0.196321	2.34065	0.0192502	0.141628	AAEL008099	Procollagen-lysine,2-oxoglutarate 5-dioxygenase [Source:UniProtKB/TrEMBL;Acc:A0A1S4FIM3]
LOC110676058	5.48437	1.90696	0.815094	2.33955	0.0193068	0.141905	AAEL023708
LOC5580150	232.451	-0.482784	0.206362	-2.3395	0.0193093	0.141905	AAEL002437	symplekin [Source:VB Community Annotation]
LOC5565159	490.136	-0.464038	0.198457	-2.33823	0.0193751	0.142298	AAEL004613	phenylalanyl-tRNA synthetase beta chain [Source:VB Community Annotation]
LOC5564758	6.73228	-1.81165	0.774854	-2.33806	0.0193842	0.142298	AAEL014610	cytochrome P450 [Source:VB Community Annotation]	CYP9J29
LOC5564482	1297.18	-1.02102	0.436807	-2.33746	0.0194151	0.142445	AAEL014486
LOC5578544	91.0848	-0.698055	0.298772	-2.33641	0.0194696	0.142767	AAEL019878
LOC110677120	24.7851	-1.18708	0.508147	-2.3361	0.019486	0.142781	AAEL022133
LOC5563782	142.693	0.485852	0.208008	2.33574	0.019505	0.142781	AAEL003946	mitochondrial ribosomal protein S33, putative [Source:VB Community Annotation]	mRpS33
LOC5566409	15.7655	-1.10388	0.472638	-2.33558	0.0195133	0.142781	AAEL019706
LOC110676024	24.5631	-1.23503	0.528797	-2.33555	0.0195147	0.142781	AAEL024713
LOC5579056	81.2055	-0.733077	0.314013	-2.33454	0.0195673	0.143086	AAEL013996
LOC5576493	835.553	-0.322952	0.138379	-2.33383	0.0196047	0.143281	AAEL019843
LOC5570121	137.412	-0.466966	0.200146	-2.33313	0.0196414	0.143329	AAEL025815
LOC5573320	37.3013	-0.748651	0.320881	-2.33311	0.0196423	0.143329	AAEL010408	GPCR GABA B Family [Source:VB Community Annotation]	GPRGBB2
LOC5571023	6176.43	0.718914	0.308141	2.33307	0.0196444	0.143329	AAEL008765	cuticle protein, putative [Source:VB Community Annotation]
LOC5576177	21.6179	-1.03778	0.444851	-2.33288	0.0196545	0.143329	AAEL019810
LOC5576923	16.7761	1.05013	0.450306	2.33203	0.0196992	0.143563	AAEL012864
LOC5571879	403.139	0.408021	0.174977	2.33185	0.0197084	0.143563	AAEL009368	lipoic acid synthetase [Source:VB Community Annotation]
LOC5580067	42.9794	0.788973	0.338455	2.3311	0.0197479	0.143772	AAEL002176	inosine-uridine preferring nucleoside hydrolase [Source:VB Community Annotation]
LOC5580283	88.6254	0.684165	0.293617	2.33013	0.0197995	0.144069	AAEL026789
LOC5575743	9.98021	-3.46741	1.48846	-2.32952	0.0198316	0.144223	AAEL012042	sugar transporter [Source:VB Community Annotation]
LOC5579020	317.925	-0.343181	0.147342	-2.32915	0.0198513	0.144287	AAEL013959
LOC110676917	40.1768	-0.722222	0.310339	-2.3272	0.0199545	0.144957	AAEL027728
LOC5577916	73.6473	-0.819727	0.352442	-2.32585	0.0200267	0.145402	AAEL003343
LOC110678100	2.32691	-3.59117	1.54442	-2.32526	0.0200583	NA	AAEL020632
LOC5579975	1796.09	-0.458635	0.197254	-2.3251	0.0200664	0.145552	AAEL014450	Peptidyl-glycine alpha-amidating monooxygenase [Source:UniProtKB/TrEMBL;Acc:A0A1S4G1Z5]
LOC5577620	280.575	-0.76713	0.32995	-2.32499	0.0200726	0.145552	AAEL003245	IMD pathway signalling I-Kappa-B Kinase 1 (IKK1 IKK-beta). (ird5 orthologue immune response deficient 5) [Source:VB Community Annotation]	IKK1
LOC110680916	24.4189	0.936314	0.402743	2.32484	0.0200803	0.145552	AAEL025175
LOC110674651	2.5436	3.73018	1.60523	2.32377	0.020138	NA	AAEL027445
LOC5577025	289.497	-0.417264	0.179588	-2.32345	0.020155	0.146014	AAEL012932	Methyltransferase-like protein [Source:UniProtKB/TrEMBL;Acc:Q16KM2]
LOC5568180	600.552	-1.12554	0.48455	-2.32286	0.0201867	0.146163	AAEL006606
LOC5564247	439.317	-0.412643	0.177673	-2.32248	0.0202068	0.146229	AAEL004196	galectin [Source:VB Community Annotation]	GALE3
LOC5567696	341.136	-1.55716	0.670555	-2.3222	0.0202222	0.14626	AAEL006269
LOC110675145	4.79219	-2.23812	0.964432	-2.32067	0.0203049	0.146778	AAEL023936
LOC5570592	112.368	0.613394	0.264368	2.32023	0.0203284	0.146807	AAEL008403
LOC5575238	1675.02	-0.550701	0.237352	-2.32018	0.020331	0.146807	AAEL011708	heat shock protein [Source:VB Community Annotation]
LOC5575290	351.414	0.813201	0.350663	2.31904	0.020393	0.147174	AAEL019670
LOC5577996	12109	-0.386791	0.166806	-2.31881	0.0204056	0.147185	AAEL003396	60S ribosomal protein L32 [Source:UniProtKB/TrEMBL;Acc:Q1HR34]	RpL32	rp49
LOC5564182	300.722	-0.52741	0.227506	-2.31823	0.0204368	0.147251	AAEL004146	cryptochrome 1 [Source:VB Community Annotation]	CRY1
LOC5577048	64.2107	-0.893453	0.385404	-2.31823	0.0204371	0.147251	AAEL012960	importin alpha [Source:VB Community Annotation]
LOC110676377	21.2944	1.12504	0.485487	2.31734	0.0204854	0.14752	AAEL027766
LOC5574517	1886.69	-0.732317	0.316062	-2.31701	0.0205033	0.147568	AAEL011191	protein phosphatase 1 binding protein [Source:VB Community Annotation]
LOC5568730	173.125	-1.33392	0.575799	-2.31665	0.0205228	0.147625	AAEL007088	ribitol kinase [Source:VB Community Annotation]
LOC110676388	4.20513	-2.41136	1.04101	-2.31638	0.0205377	0.147625	AAEL019850
LOC5571750	7.41845	-2.02454	0.87406	-2.31625	0.0205446	0.147625	AAEL027256
LOC5575034	30.5073	-0.932349	0.402593	-2.31586	0.020566	0.147698	AAEL011582
LOC5565044	78.6757	0.662439	0.286227	2.31438	0.0206469	0.148199	AAEL004579	short-chain dehydrogenase [Source:VB Community Annotation]
LOC5565102	1037.44	-2.28017	0.985392	-2.31398	0.0206691	0.148278	AAEL019581
LOC5564076	142.457	0.481119	0.207945	2.31368	0.0206851	0.148312	AAEL014295
LOC5567317	1501.34	-0.539972	0.233404	-2.31347	0.0206968	0.148316	AAEL019725
LOC5572851	1146.35	1.34609	0.58219	2.31211	0.0207714	0.148765	AAEL010073	metalloendopeptidase [Source:VB Community Annotation]
LOC5573256	384.694	0.670181	0.289894	2.31182	0.0207877	0.148765	AAEL010338
LOC5574528	39.9716	-0.861934	0.372854	-2.31172	0.0207932	0.148765	AAEL011200
LOC5578447	48.9974	-0.619538	0.26818	-2.31016	0.0208793	0.149301	AAEL018324
LOC23687757	653.908	-0.66434	0.287758	-2.30867	0.0209618	0.149809	AAEL023894
LOC110675735	34.576	0.766338	0.33201	2.30818	0.0209893	0.149847	AAEL023924
LOC5575927	782.29	-2.45084	1.06181	-2.30817	0.0209896	0.149847	AAEL012164	spaetzle-like cytokine [Source:VB Community Annotation]	SPZ6
LOC5569470	2536.85	0.286902	0.124329	2.3076	0.0210211	0.149991	AAEL007651	phosphorylase b kinase [Source:VB Community Annotation]
LOC5567187	103.797	-1.22887	0.532586	-2.30736	0.021035	0.150009	AAEL000882
LOC110681501	633.637	0.524459	0.22735	2.30683	0.0210642	0.150136	AAEL025438
LOC5578018	20.463	-1.20139	0.521133	-2.30534	0.0211473	0.150648	AAEL003382	Ro ribonucleoprotein autoantigen, putative [Source:VB Community Annotation]
LOC110679151	19.839	1.4501	0.629193	2.30469	0.0211837	0.150826	AAEL027844
LOC5575639	194.286	-0.634216	0.27532	-2.30356	0.0212475	0.151136	AAEL026043
LOC5570809	164.823	0.43094	0.187093	2.30335	0.0212594	0.151136	AAEL008582	40S ribosomal protein S2 [Source:VB Community Annotation]	RpS2
LOC110678491	3.05483	-3.07291	1.33411	-2.30333	0.0212601	NA	AAEL022310
LOC5564538	177.192	0.683208	0.29662	2.30331	0.0212615	0.151136	AAEL023825
LOC5566462	843.95	0.410388	0.178217	2.30274	0.0212933	0.15128	AAEL005419	twinfilin [Source:VB Community Annotation]	twf
LOC5567473	1631.75	0.979671	0.425633	2.30168	0.0213534	0.151626	AAEL000931	Alkaline phosphatase [Source:UniProtKB/TrEMBL;Acc:Q1HQK7]
LOC110681260	53.1722	0.652911	0.283762	2.30092	0.0213964	0.15185	AAEL025877
LOC5572229	248.936	0.425207	0.184827	2.30057	0.0214159	0.151907	AAEL018182
LOC5564126	657.849	-0.653097	0.283943	-2.3001	0.0214423	0.152013	AAEL004097	enhancer of split protein, putative [Source:VB Community Annotation]
LOC5577665	150.31	-0.890264	0.387113	-2.29975	0.0214623	0.152074	AAEL019590
LOC5569547	5430.75	-0.504687	0.219548	-2.29875	0.021519	0.152393	AAEL007718	Eukaryotic translation initiation factor 3 subunit B (eIF3b)(Eukaryotic translation initiation factor 3 subunit 9) [Source:VB Community Annotation]
LOC5570370	15.9434	1.34302	0.584721	2.29686	0.0216269	0.153076	AAEL008275
LOC110679482	1.94612	-4.39706	1.91442	-2.29681	0.0216296	NA	AAEL026143
LOC5565436	159.317	0.513713	0.223697	2.29646	0.0216493	0.153153	AAEL026231
LOC5575917	261.054	-0.514899	0.224235	-2.29625	0.0216616	0.153158	AAEL027424
LOC5580215	146.277	-0.508519	0.221532	-2.29547	0.0217063	0.153374	AAEL011924
LOC110678368	3.28071	-3.11697	1.35794	-2.29537	0.0217119	NA	AAEL022112
LOC5573974	17538.3	-0.396093	0.172595	-2.29493	0.0217373	0.153374	AAEL010821	60S ribosomal protein LP0 [Source:VB Community Annotation]	RpLP0
LOC110676476	100.024	-0.545621	0.237777	-2.29468	0.0217517	0.153374	AAEL025505
LOC5566683	67.1745	-0.691893	0.301587	-2.29417	0.0217807	0.153374	AAEL023046
LOC5580076	17.4043	-1.48503	0.647323	-2.29411	0.021784	0.153374	AAEL002138	triacylglycerol lipase, putative [Source:VB Community Annotation]
LOC5572849	184.699	-0.553123	0.241109	-2.29408	0.0217861	0.153374	AAEL010074
LOC5579115	171.013	0.599267	0.261224	2.29407	0.0217863	0.153374	AAEL003864
LOC5576729	699.122	-0.569344	0.248211	-2.29379	0.0218024	0.153374	AAEL002950
LOC5579882	11.6021	-1.22065	0.53217	-2.29372	0.0218064	0.153374	AAEL019573
LOC5578774	68.3308	1.01566	0.442807	2.29369	0.021808	0.153374	AAEL003656
LOC110675764	3.49392	-2.58861	1.12876	-2.29332	0.0218297	NA	AAEL026720
LOC5570885	88.613	-1.15757	0.504761	-2.2933	0.0218308	0.153389	AAEL008655	GPCR Vasopressin Family [Source:VB Community Annotation]	GPRVPR2
LOC5566959	27531.2	-0.414295	0.180658	-2.29326	0.0218333	0.153389	AAEL005722	60S ribosomal protein L7a [Source:VB Community Annotation]	RpL26
LOC5572782	2805.91	0.483932	0.211065	2.29281	0.0218588	0.153487	AAEL010047
LOC5575533	145.779	0.51002	0.222571	2.29149	0.0219352	0.153941	AAEL011912	mannose-1-phosphate guanyltransferase [Source:VB Community Annotation]
LOC5576972	33.0668	1.05687	0.461295	2.29109	0.0219582	0.153967	AAEL003076	glucosyl/glucuronosyl transferases [Source:VB Community Annotation]
LOC5576408	131.493	0.578873	0.25267	2.29102	0.0219621	0.153967	AAEL012502
LOC5566981	360.795	-0.811477	0.354295	-2.2904	0.0219983	0.154139	AAEL019523
LOC5576203	42.661	0.770721	0.336571	2.28992	0.022026	0.154252	AAEL012398
LOC5572892	62.1179	1.01768	0.444481	2.28959	0.0220452	0.154305	AAEL024732
LOC5566497	219.916	-0.594699	0.259822	-2.28887	0.0220869	0.154515	AAEL005437	transient receptor potential channel [Source:VB Community Annotation]
LOC110676764	285.103	-0.356677	0.155978	-2.28672	0.0222123	0.155153	AAEL028011
LOC110673999	1962.45	-0.403148	0.176307	-2.28662	0.0222178	0.155153	AAEL006993	synapse-associated protein [Source:VB Community Annotation]
LOC110676701	34.7331	0.748303	0.327264	2.28654	0.0222226	0.155153	AAEL025169
LOC110681509	43.1023	0.750261	0.328126	2.2865	0.022225	0.155153	AAEL027953
LOC110677117	13.2762	1.33125	0.582812	2.28419	0.0223606	0.156018	AAEL022772
LOC110681118	319.763	1.18424	0.518587	2.28359	0.0223958	0.156113	AAEL020799
LOC5570336	106.227	0.495934	0.217176	2.28355	0.0223978	0.156113	AAEL001382	small nuclear ribonucleoprotein sm d1 [Source:VB Community Annotation]
LOC5573015	2641.75	0.284425	0.124603	2.28266	0.0224506	0.156399	AAEL001916	eukaryotic translation initiation factor 4e [Source:VB Community Annotation]
LOC5572184	132.374	-0.59058	0.258748	-2.28245	0.0224627	0.1564	AAEL019431	ecdysone receptor [Source:VB Community Annotation]	EcR
LOC110678390	2.50234	-3.72555	1.63392	-2.28012	0.0226003	NA	AAEL020280
LOC5564784	322.065	0.380582	0.166935	2.27983	0.0226179	0.157398	AAEL004430	mitochondrial ribosomal protein, L30, putative [Source:VB Community Annotation]	mRpL30
LOC5567175	45.4213	0.679536	0.298194	2.27884	0.0226768	0.157725	AAEL000903	Enhancer of yellow 2 transcription factor [Source:UniProtKB/Swiss-Prot;Acc:Q17MZ8]	e(y)2
LOC5572202	478.698	0.406609	0.178497	2.27796	0.0227289	0.158004	AAEL019918
LOC5572634	9615.97	0.526958	0.231358	2.27768	0.0227458	0.158039	AAEL001863	zinc carboxypeptidase [Source:VB Community Annotation]
LOC5579815	1135.55	0.363278	0.159538	2.27706	0.0227825	0.158211	AAEL023500
LOC5571183	22997.2	0.466904	0.20511	2.27635	0.0228248	0.158345	AAEL008887	cytochrome c oxidase,-subunit VIb [Source:VB Community Annotation]
LOC5571011	161.314	0.449414	0.197454	2.27604	0.0228434	0.158345	AAEL008736	p31A, putative [Source:VB Community Annotation]
LOC110675292	4.10082	2.41381	1.06053	2.27604	0.0228438	0.158345	AAEL021285
LOC5564226	10468.2	-0.380743	0.167291	-2.27594	0.0228496	0.158345	AAEL004175	40S ribosomal protein S17 [Source:UniProtKB/TrEMBL;Acc:Q52UT2]	RpS17
LOC5566310	15.5133	-1.27635	0.561293	-2.27394	0.0229697	0.159016	AAEL005297	guanine nucleotide exchange factor [Source:VB Community Annotation]
LOC5578854	141.522	0.45731	0.201115	2.27387	0.0229739	0.159016	AAEL003730	mitochondrial ribosomal protein, S28, putative [Source:VB Community Annotation]	mRpS28
LOC5572733	169.625	-0.408241	0.179547	-2.27373	0.0229825	0.159016	AAEL010007
LOC110675794	24.4396	1.01498	0.446836	2.27149	0.0231175	0.159867	AAEL026681
LOC5577500	532.002	-0.886085	0.390189	-2.27091	0.0231525	0.160025	AAEL003184	mfs transporter [Source:VB Community Annotation]
LOC5577344	59.8218	-0.727508	0.3204	-2.27063	0.0231696	0.16006	AAEL000425
LOC110678124	2.24343	-3.56335	1.5695	-2.27038	0.0231847	NA	AAEL020444
LOC110677277	28.8054	0.957112	0.421634	2.27001	0.023207	0.160173	AAEL020842
LOC5575302	91.5627	-0.574677	0.253184	-2.2698	0.0232197	0.160173	AAEL002581	structural maintenance of chromosomes 6 smc6 [Source:VB Community Annotation]
LOC5574493	18.0297	1.15295	0.507963	2.26976	0.0232222	0.160173	AAEL002406
LOC5577338	156.707	-1.28202	0.565098	-2.26867	0.0232881	0.160528	AAEL000442	protein oskar [Source:VB Community Annotation]	osk
LOC110675186	9.01506	-1.57949	0.696267	-2.26851	0.0232979	0.160528	AAEL020254
LOC5564878	45690.7	0.716559	0.315913	2.26822	0.0233158	0.160568	AAEL004457	cytochrome c [Source:VB Community Annotation]
LOC5574626	244.792	0.419126	0.184831	2.26762	0.0233527	0.160671	AAEL011264	phosphatidylethanolamine-binding protein [Source:VB Community Annotation]
LOC5568385	2120.92	0.890708	0.392802	2.26758	0.023355	0.160671	AAEL006774	Fatty acyl-CoA reductase [Source:UniProtKB/TrEMBL;Acc:Q174U8]
LOC5578284	19.9536	-1.17991	0.520604	-2.26642	0.0234259	0.161023	AAEL023810
LOC5568748	201.717	-0.41527	0.183247	-2.26618	0.0234406	0.161023	AAEL007084	Methyltransferase-like protein [Source:UniProtKB/TrEMBL;Acc:A0A1S4FFL5]
LOC5565875	47.7468	-0.671876	0.296485	-2.26614	0.0234427	0.161023	AAEL026651
LOC110675802	31.2963	0.994442	0.438896	2.26578	0.0234646	0.161032	AAEL023633
LOC5572895	57.9639	-0.632924	0.279347	-2.26572	0.0234683	0.161032	AAEL020150
LOC5577250	46.4459	0.709396	0.313271	2.26448	0.0235444	0.161425	AAEL027982	peptidoglycan recognition protein LE [Source:VB Community Annotation]	PGRP-LE
LOC110674102	15.3853	1.12287	0.495882	2.26439	0.0235501	0.161425	AAEL023447
LOC5569935	73.4778	-0.551807	0.243762	-2.26371	0.0235918	0.161628	AAEL026494
LOC5580307	317.464	-0.496996	0.219637	-2.26281	0.0236472	0.16187	AAEL003018
LOC5575455	184.711	-1.34783	0.595718	-2.26252	0.0236651	0.16187	AAEL002654
LOC5568254	28.9166	2.05948	0.910263	2.26251	0.0236658	0.16187	AAEL006702	fibrinogen and fibronectin [Source:VB Community Annotation]
LOC5564562	648.083	-0.921375	0.407265	-2.26235	0.023676	0.16187	AAEL004305
LOC110676295	2.16818	-3.49263	1.5439	-2.26221	0.0236844	NA	AAEL020453
LOC5573473	356.939	0.386044	0.170656	2.26212	0.02369	0.161882	AAEL010514	aminoacyl-tRNA synthetase auxiliary protein, 43kD, putative [Source:VB Community Annotation]
LOC5573174	42.8815	0.855037	0.378262	2.26044	0.0237942	0.16251	AAEL002010
LOC5566672	11.6888	2.08985	0.924982	2.25934	0.023862	0.162889	AAEL005533	synaptic vesicle protein [Source:VB Community Annotation]
LOC110677788	225.275	-0.526858	0.233213	-2.25913	0.0238752	0.162895	AAEL008027
LOC5578489	2022.74	-0.35831	0.158727	-2.25739	0.0239834	0.163494	AAEL003551
LOC5579045	227.795	0.407545	0.18055	2.25724	0.0239929	0.163494	AAEL013980	glutaredoxin, putative [Source:VB Community Annotation]
LOC5570939	142.608	-0.687159	0.304439	-2.25713	0.0240001	0.163494	AAEL008664
LOC5568217	13.3314	-1.21159	0.537066	-2.25594	0.0240746	0.163918	AAEL025845
LOC110674657	2.1346	3.47614	1.54123	2.25544	0.024106	NA	AAEL020520
LOC5564158	94.5101	0.609221	0.270454	2.25258	0.0242854	0.165268	AAEL004137	acyl-coa dehydrogenase [Source:VB Community Annotation]
LOC5576136	21.9975	-0.888803	0.394775	-2.25141	0.0243593	0.165686	AAEL024236
LOC5575535	1606.49	0.482238	0.214281	2.25049	0.024418	0.166	AAEL011905	myosin i [Source:VB Community Annotation]
LOC5578052	46.0109	-0.670647	0.298056	-2.25007	0.0244447	0.166074	AAEL013487	RHO guanyl-nucleotide exchange factor, putative [Source:VB Community Annotation]
LOC5571033	256.773	0.836641	0.371881	2.24975	0.0244645	0.166074	AAEL008754
LOC5565793	2054.68	2.25173	1.00089	2.24972	0.0244665	0.166074	AAEL021691
LOC5568895	35.551	-1.91936	0.853704	-2.24827	0.0245589	0.166549	AAEL007220	Fatty acyl-CoA reductase [Source:UniProtKB/TrEMBL;Acc:A0A1S4FFZ9]
LOC5569655	77.5959	-0.601935	0.267738	-2.24823	0.0245617	0.166549	AAEL007805
LOC23687777	2434.82	-0.456827	0.203229	-2.24785	0.0245859	0.166628	AAEL017357
LOC5571763	1883.28	0.409016	0.18199	2.24746	0.0246105	0.166709	AAEL009287	ran [Source:VB Community Annotation]
LOC5575734	174.174	-0.999313	0.444729	-2.24702	0.024639	0.166817	AAEL027018
LOC110676200	33.6189	-1.00976	0.449541	-2.24619	0.0246917	0.167088	AAEL024240
LOC110675836	95.2011	-0.530479	0.23621	-2.24579	0.0247174	0.167177	AAEL021196
LOC5578864	268.34	-0.359396	0.160075	-2.24517	0.0247571	0.16721	AAEL015450	ribonuclease UK114, putative [Source:VB Community Annotation]
LOC110679061	64.9125	0.792699	0.353074	2.24513	0.0247595	0.16721	AAEL023230
LOC5579796	1190.94	-0.341706	0.152199	-2.24512	0.0247601	0.16721	AAEL003976
[truncated: 17,262 more rows]

## Sheet: GO Enrichment BP
GO.ID	Term	Annotated	Significant	Expected	weight01KS
GO:0006412	translation	285	52	22.52	< 1e-30
GO:0022900	electron transport chain	56	23	4.43	5.9e-09
GO:0055114	oxidation-reduction process	661	105	52.24	2.3e-06
GO:0015986	ATP synthesis coupled proton transport	16	6	1.26	2.5e-06
GO:0098869	cellular oxidant detoxification	31	5	2.45	4.7e-05
GO:0042775	mitochondrial ATP synthesis coupled elec...	12	8	0.95	0.0002
GO:0006120	mitochondrial electron transport, NADH t...	7	3	0.55	0.00049
GO:0007602	phototransduction	10	6	0.79	0.00064
GO:0018298	protein-chromophore linkage	10	5	0.79	0.00064
GO:0006979	response to oxidative stress	26	2	2.05	0.0012
GO:0006096	glycolytic process	11	5	0.87	0.0014
GO:0032981	mitochondrial respiratory chain complex ...	5	3	0.4	0.00147
GO:0042176	regulation of protein catabolic process	7	4	0.55	0.00379
GO:0043161	proteasome-mediated ubiquitin-dependent ...	20	2	1.58	0.00503
GO:0007601	visual perception	16	6	1.26	0.0092
GO:0045454	cell redox homeostasis	39	9	3.08	0.00928
GO:0006094	gluconeogenesis	10	5	0.79	0.01123
GO:0050808	synapse organization	6	0	0.47	0.01131
GO:0000724	double-strand break repair via homologou...	8	0	0.63	0.01182
GO:0051049	regulation of transport	35	0	2.77	0.01349
GO:0000387	spliceosomal snRNP assembly	9	0	0.71	0.01436
GO:0006559	L-phenylalanine catabolic process	5	0	0.4	0.01485
GO:0040008	regulation of growth	11	1	0.87	0.01541
GO:0051603	proteolysis involved in cellular protein...	84	13	6.64	0.01746
GO:0006626	protein targeting to mitochondrion	14	3	1.11	0.01911
GO:0046916	cellular transition metal ion homeostasi...	13	5	1.03	0.02048
GO:0032543	mitochondrial translation	10	1	0.79	0.02367
GO:0001732	formation of cytoplasmic translation ini...	13	0	1.03	0.02523
GO:0048477	oogenesis	8	0	0.63	0.02621
GO:0008535	respiratory chain complex IV assembly	8	5	0.63	0.02757
GO:0017038	protein import	23	5	1.82	0.02815
GO:0006560	proline metabolic process	7	3	0.55	0.02919
GO:0043623	cellular protein complex assembly	80	14	6.32	0.03001
GO:0007186	G-protein coupled receptor signaling pat...	139	12	10.99	0.03287
GO:0006783	heme biosynthetic process	13	4	1.03	0.03334
GO:0007093	mitotic cell cycle checkpoint	13	1	1.03	0.03453
GO:0032940	secretion by cell	27	1	2.13	0.03677
GO:0034220	ion transmembrane transport	231	20	18.26	0.03734
GO:0006259	DNA metabolic process	200	9	15.81	0.03804
GO:0006414	translational elongation	29	2	2.29	0.03819
GO:0050790	regulation of catalytic activity	163	16	12.88	0.03868
GO:0042773	ATP synthesis coupled electron transport	14	9	1.11	0.03936
GO:0010498	proteasomal protein catabolic process	23	4	1.82	0.04059
GO:0033617	mitochondrial respiratory chain complex ...	6	3	0.47	0.04084
GO:0030150	protein import into mitochondrial matrix	7	1	0.55	0.04145
GO:1901616	organic hydroxy compound catabolic proce...	15	2	1.19	0.04243
GO:1901361	organic cyclic compound catabolic proces...	79	6	6.24	0.04339
GO:1902600	hydrogen ion transmembrane transport	50	9	3.95	0.04423
GO:0015991	ATP hydrolysis coupled proton transport	17	1	1.34	0.04512
GO:0006811	ion transport	334	26	26.4	0.0475
GO:0044248	cellular catabolic process	246	22	19.44	0.0488
GO:0055070	copper ion homeostasis	5	3	0.4	0.05013
GO:0046855	inositol phosphate dephosphorylation	6	0	0.47	0.05072
GO:0006662	glycerol ether metabolic process	7	2	0.55	0.05152
GO:0006302	double-strand break repair	16	0	1.26	0.05155
GO:0030837	negative regulation of actin filament po...	10	1	0.79	0.05237
GO:0070646	protein modification by small protein re...	39	3	3.08	0.0524
GO:0009058	biosynthetic process	1287	117	101.72	0.05763
GO:0044242	cellular lipid catabolic process	19	0	1.5	0.05774
GO:0046164	alcohol catabolic process	13	1	1.03	0.05774
GO:0045787	positive regulation of cell cycle	5	0	0.4	0.0593
GO:0070972	protein localization to endoplasmic reti...	17	0	1.34	0.06039
GO:0019953	sexual reproduction	19	1	1.5	0.06132
GO:0061640	cytoskeleton-dependent cytokinesis	6	0	0.47	0.06244
GO:0035335	peptidyl-tyrosine dephosphorylation	36	6	2.85	0.06427
GO:0022904	respiratory electron transport chain	16	9	1.26	0.06474
GO:0009226	nucleotide-sugar biosynthetic process	8	1	0.63	0.0687
GO:0006869	lipid transport	51	3	4.03	0.06888
GO:0006119	oxidative phosphorylation	18	10	1.42	0.06896
GO:0007268	chemical synaptic transmission	30	0	2.37	0.0694
GO:0046034	ATP metabolic process	50	22	3.95	0.07107
GO:0006099	tricarboxylic acid cycle	21	5	1.66	0.07133
GO:0051321	meiotic cell cycle	15	1	1.19	0.07217
GO:0043648	dicarboxylic acid metabolic process	7	2	0.55	0.07241
GO:0006040	amino sugar metabolic process	49	8	3.87	0.07351
GO:0005977	glycogen metabolic process	7	2	0.55	0.07428
GO:0030163	protein catabolic process	92	16	7.27	0.07499
GO:0016125	sterol metabolic process	7	0	0.55	0.07501
GO:0007169	transmembrane receptor protein tyrosine ...	13	0	1.03	0.07545
GO:0043462	regulation of ATPase activity	7	2	0.55	0.0789
GO:0032956	regulation of actin cytoskeleton organiz...	29	4	2.29	0.08391
GO:0007034	vacuolar transport	13	0	1.03	0.08417
GO:0006511	ubiquitin-dependent protein catabolic pr...	75	10	5.93	0.08678
GO:0015780	nucleotide-sugar transport	5	0	0.4	0.08687
GO:0006030	chitin metabolic process	44	8	3.48	0.08733
GO:0043647	inositol phosphate metabolic process	10	0	0.79	0.09048
GO:0006825	copper ion transport	6	3	0.47	0.09084
GO:0006222	UMP biosynthetic process	5	1	0.4	0.09108
GO:0018108	peptidyl-tyrosine phosphorylation	31	3	2.45	0.09389
GO:0031329	regulation of cellular catabolic process	11	2	0.87	0.09813
GO:0072593	reactive oxygen species metabolic proces...	15	0	1.19	0.09944
GO:0018065	protein-cofactor linkage	6	2	0.47	0.10053
GO:0006633	fatty acid biosynthetic process	41	6	3.24	0.10155
GO:0009968	negative regulation of signal transducti...	18	3	1.42	0.10199
GO:0048609	multicellular organismal reproductive pr...	16	0	1.26	0.10276
GO:0010468	regulation of gene expression	519	21	41.02	0.10895
GO:0007346	regulation of mitotic cell cycle	19	1	1.5	0.11018
GO:0050907	detection of chemical stimulus involved ...	9	0	0.71	0.11129
GO:0097428	protein maturation by iron-sulfur cluste...	7	3	0.55	0.11287
GO:0006413	translational initiation	48	5	3.79	0.1132
GO:0000723	telomere maintenance	9	1	0.71	0.11487
GO:0006751	glutathione catabolic process	6	1	0.47	0.11847
GO:0018958	phenol-containing compound metabolic pro...	6	1	0.47	0.11936
GO:0033108	mitochondrial respiratory chain complex ...	15	7	1.19	0.11953
GO:0006816	calcium ion transport	34	2	2.69	0.12105
GO:0046148	pigment biosynthetic process	21	4	1.66	0.12125
GO:1903507	negative regulation of nucleic acid-temp...	36	1	2.85	0.1221
GO:0035023	regulation of Rho protein signal transdu...	9	0	0.71	0.12507
GO:0021700	developmental maturation	5	0	0.4	0.13052
GO:0006629	lipid metabolic process	282	22	22.29	0.13205
GO:0009166	nucleotide catabolic process	10	1	0.79	0.13474
GO:0048583	regulation of response to stimulus	91	9	7.19	0.13923
GO:0032465	regulation of cytokinesis	7	0	0.55	0.14276
GO:0072657	protein localization to membrane	22	4	1.74	0.14348
GO:1901699	cellular response to nitrogen compound	10	0	0.79	0.14511
GO:0046173	polyol biosynthetic process	11	1	0.87	0.14664
GO:0051304	chromosome separation	10	1	0.79	0.14967
GO:0018130	heterocycle biosynthetic process	638	36	50.42	0.15582
GO:0030111	regulation of Wnt signaling pathway	10	1	0.79	0.15632
GO:0042981	regulation of apoptotic process	12	2	0.95	0.15825
GO:0031109	microtubule polymerization or depolymeri...	8	0	0.63	0.1617
GO:0043624	cellular protein complex disassembly	17	3	1.34	0.16552
GO:0098609	cell-cell adhesion	23	2	1.82	0.16609
GO:0046131	pyrimidine ribonucleoside metabolic proc...	11	1	0.87	0.16747
GO:0016226	iron-sulfur cluster assembly	10	3	0.79	0.16793
GO:0007018	microtubule-based movement	54	5	4.27	0.16925
GO:0006479	protein methylation	37	2	2.92	0.1701
GO:1901701	cellular response to oxygen-containing c...	14	0	1.11	0.17322
GO:0000725	recombinational repair	9	1	0.71	0.17336
GO:0046907	intracellular transport	216	10	17.07	0.17424
GO:0044282	small molecule catabolic process	55	4	4.35	0.1764
GO:0007059	chromosome segregation	33	3	2.61	0.17944
GO:0035556	intracellular signal transduction	183	11	14.46	0.18022
GO:0043173	nucleotide salvage	6	0	0.47	0.18344
GO:0043174	nucleoside salvage	6	0	0.47	0.18344
GO:1901362	organic cyclic compound biosynthetic pro...	647	36	51.13	0.1874
GO:0098657	import into cell	36	0	2.85	0.18916
GO:0006066	alcohol metabolic process	32	2	2.53	0.19135
GO:0007411	axon guidance	20	3	1.58	0.19412
GO:0032870	cellular response to hormone stimulus	10	0	0.79	0.19521
GO:1901137	carbohydrate derivative biosynthetic pro...	182	12	14.38	0.19694
GO:0009059	macromolecule biosynthetic process	947	78	74.84	0.19744
GO:0065003	macromolecular complex assembly	154	16	12.17	0.19822
GO:0048870	cell motility	7	0	0.55	0.20265
GO:0035601	protein deacylation	6	0	0.47	0.20292
GO:0043039	tRNA aminoacylation	44	1	3.48	0.20312
GO:0042157	lipoprotein metabolic process	24	0	1.9	0.20316
GO:0017004	cytochrome complex assembly	11	6	0.87	0.20367
GO:0003006	developmental process involved in reprod...	10	0	0.79	0.20422
GO:0009416	response to light stimulus	13	6	1.03	0.20453
GO:0072329	monocarboxylic acid catabolic process	9	0	0.71	0.20597
GO:0006720	isoprenoid metabolic process	18	2	1.42	0.20819
GO:0007099	centriole replication	6	0	0.47	0.20828
GO:0006370	7-methylguanosine mRNA capping	6	0	0.47	0.20844
GO:0006793	phosphorus metabolic process	680	54	53.74	0.21357
GO:0034968	histone lysine methylation	14	1	1.11	0.21447
GO:0006541	glutamine metabolic process	10	0	0.79	0.2161
GO:0009167	purine ribonucleoside monophosphate meta...	65	22	5.14	0.21672
GO:0023051	regulation of signaling	92	9	7.27	0.21677
GO:0009179	purine ribonucleoside diphosphate metabo...	14	5	1.11	0.21928
GO:0006605	protein targeting	37	5	2.92	0.21979
GO:1901068	guanosine-containing compound metabolic ...	8	0	0.63	0.21996
GO:0007275	multicellular organism development	155	9	12.25	0.22037
GO:0006006	glucose metabolic process	14	7	1.11	0.22182
GO:0030162	regulation of proteolysis	52	5	4.11	0.22299
GO:0032268	regulation of cellular protein metabolic...	139	9	10.99	0.22362
GO:0051129	negative regulation of cellular componen...	23	1	1.82	0.22492
GO:0044743	protein transmembrane import into intrac...	12	3	0.95	0.22877
GO:0016051	carbohydrate biosynthetic process	24	7	1.9	0.22997
GO:0016070	RNA metabolic process	878	30	69.39	0.23092
GO:1901991	negative regulation of mitotic cell cycl...	9	0	0.71	0.23227
GO:0032989	cellular component morphogenesis	28	3	2.21	0.23412
GO:0048284	organelle fusion	5	0	0.4	0.23463
GO:0060079	excitatory postsynaptic potential	9	0	0.71	0.23596
GO:0019509	L-methionine salvage from methylthioaden...	6	0	0.47	0.23622
GO:0007017	microtubule-based process	111	7	8.77	0.23637
GO:0072330	monocarboxylic acid biosynthetic process	43	6	3.4	0.23744
GO:0044267	cellular protein metabolic process	1106	107	87.41	0.23749
GO:0009067	aspartate family amino acid biosynthetic...	9	0	0.71	0.23791
GO:0007043	cell-cell junction assembly	6	0	0.47	0.23842
GO:0090150	establishment of protein localization to...	21	3	1.66	0.23907
GO:0046700	heterocycle catabolic process	73	5	5.77	0.23954
GO:0061024	membrane organization	36	4	2.85	0.23968
GO:0019430	removal of superoxide radicals	7	0	0.55	0.24076
GO:1903047	mitotic cell cycle process	39	1	3.08	0.25002
GO:0006744	ubiquinone biosynthetic process	8	1	0.63	0.25042
GO:0070507	regulation of microtubule cytoskeleton o...	7	0	0.55	0.25091
GO:0009452	7-methylguanosine RNA capping	8	0	0.63	0.25097
GO:0023056	positive regulation of signaling	23	2	1.82	0.25542
GO:0010647	positive regulation of cell communicatio...	23	2	1.82	0.25542
GO:0022411	cellular component disassembly	21	3	1.66	0.25554
GO:0050804	modulation of chemical synaptic transmis...	12	0	0.95	0.25572
GO:0071985	multivesicular body sorting pathway	6	0	0.47	0.25731
GO:0034728	nucleosome organization	14	0	1.11	0.2607
GO:0032502	developmental process	190	11	15.02	0.26372
GO:0006206	pyrimidine nucleobase metabolic process	5	1	0.4	0.26558
GO:0003008	system process	46	6	3.64	0.26559
GO:0006082	organic acid metabolic process	249	24	19.68	0.26898
GO:0043254	regulation of protein complex assembly	27	3	2.13	0.27062
GO:0032012	regulation of ARF protein signal transdu...	6	1	0.47	0.27083
GO:0007269	neurotransmitter secretion	5	0	0.4	0.27159
GO:0006664	glycolipid metabolic process	23	0	1.82	0.27171
GO:0043085	positive regulation of catalytic activit...	68	7	5.37	0.27647
GO:0098662	inorganic cation transmembrane transport	138	13	10.91	0.27783
GO:0006026	aminoglycan catabolic process	7	0	0.55	0.27944
GO:0048666	neuron development	23	3	1.82	0.28309
GO:0044260	cellular macromolecule metabolic process	2052	145	162.18	0.28592
GO:0006887	exocytosis	22	1	1.74	0.28625
GO:0006796	phosphate-containing compound metabolic ...	662	54	52.32	0.28802
GO:0032008	positive regulation of TOR signaling	8	1	0.63	0.28854
GO:0008272	sulfate transport	10	0	0.79	0.28883
GO:0044257	cellular protein catabolic process	85	13	6.72	0.29374
GO:0006690	icosanoid metabolic process	7	1	0.55	0.29438
GO:0070727	cellular macromolecule localization	159	9	12.57	0.29506
GO:0006403	RNA localization	28	1	2.21	0.29511
GO:1901575	organic substance catabolic process	276	31	21.81	0.29651
GO:0060429	epithelium development	11	0	0.87	0.29687
GO:0035235	ionotropic glutamate receptor signaling ...	12	2	0.95	0.29689
GO:0034765	regulation of ion transmembrane transpor...	31	0	2.45	0.29695
GO:0010243	response to organonitrogen compound	10	0	0.79	0.29761
GO:0009225	nucleotide-sugar metabolic process	10	1	0.79	0.3005
GO:0051347	positive regulation of transferase activ...	13	1	1.03	0.30383
GO:0009190	cyclic nucleotide biosynthetic process	21	1	1.66	0.30895
GO:0007015	actin filament organization	35	4	2.77	0.30918
GO:0006928	movement of cell or subcellular componen...	79	8	6.24	0.31142
GO:0030029	actin filament-based process	53	5	4.19	0.31156
GO:0002183	cytoplasmic translational initiation	14	0	1.11	0.31168
GO:0120036	plasma membrane bounded cell projection ...	59	4	4.66	0.31228
GO:0030522	intracellular receptor signaling pathway	7	0	0.55	0.313
GO:0098655	cation transmembrane transport	151	14	11.93	0.31751
GO:0045862	positive regulation of proteolysis	5	2	0.4	0.31775
GO:0006915	apoptotic process	41	4	3.24	0.3182
GO:0042221	response to chemical	109	8	8.61	0.31829
GO:0006829	zinc II ion transport	6	1	0.47	0.31857
GO:0009086	methionine biosynthetic process	7	0	0.55	0.31898
GO:0016050	vesicle organization	6	1	0.47	0.31959
GO:2000112	regulation of cellular macromolecule bio...	454	18	35.88	0.32241
GO:1901264	carbohydrate derivative transport	26	0	2.05	0.32747
GO:0015931	nucleobase-containing compound transport	53	1	4.19	0.32845
GO:0007600	sensory perception	42	6	3.32	0.3292
GO:0022402	cell cycle process	65	1	5.14	0.33253
GO:0044782	cilium organization	37	1	2.92	0.33488
GO:0033365	protein localization to organelle	52	3	4.11	0.33643
GO:0051253	negative regulation of RNA metabolic pro...	37	1	2.92	0.34314
GO:0032784	regulation of DNA-templated transcriptio...	5	0	0.4	0.3454
GO:0006468	protein phosphorylation	258	14	20.39	0.348
GO:0006693	prostaglandin metabolic process	6	1	0.47	0.34889
GO:0031047	gene silencing by RNA	36	2	2.85	0.34989
GO:0050794	regulation of cellular process	1270	72	100.37	0.35006
GO:0006782	protoporphyrinogen IX biosynthetic proce...	7	1	0.55	0.35042
GO:1901615	organic hydroxy compound metabolic proce...	44	3	3.48	0.35097
GO:0006012	galactose metabolic process	6	2	0.47	0.35202
GO:0018200	peptidyl-glutamic acid modification	7	0	0.55	0.35319
GO:0048589	developmental growth	12	1	0.95	0.35337
GO:0051239	regulation of multicellular organismal p...	10	0	0.79	0.35544
GO:0007049	cell cycle	146	6	11.54	0.3584
GO:0007166	cell surface receptor signaling pathway	125	4	9.88	0.35865
GO:0048017	inositol lipid-mediated signaling	6	0	0.47	0.35948
GO:0006368	transcription elongation from RNA polyme...	11	0	0.87	0.36239
GO:0046940	nucleoside monophosphate phosphorylation	5	0	0.4	0.365
GO:0055072	iron ion homeostasis	11	2	0.87	0.37054
GO:0046058	cAMP metabolic process	7	0	0.55	0.37469
GO:1901663	quinone biosynthetic process	9	1	0.71	0.37986
GO:0007156	homophilic cell adhesion via plasma memb...	22	1	1.74	0.38026
GO:0071705	nitrogen compound transport	265	10	20.94	0.38037
GO:0051252	regulation of RNA metabolic process	435	17	34.38	0.38038
GO:1990542	mitochondrial transmembrane transport	6	1	0.47	0.38088
GO:0007010	cytoskeleton organization	114	8	9.01	0.38091
GO:0006611	protein export from nucleus	13	0	1.03	0.38537
GO:0010608	posttranscriptional regulation of gene e...	50	3	3.95	0.38559
GO:0009790	embryo development	6	1	0.47	0.38578
GO:0009156	ribonucleoside monophosphate biosyntheti...	39	8	3.08	0.38648
GO:0046390	ribose phosphate biosynthetic process	65	8	5.14	0.38686
GO:0046496	nicotinamide nucleotide metabolic proces...	25	5	1.98	0.38715
GO:0006417	regulation of translation	39	2	3.08	0.38771
GO:0006081	cellular aldehyde metabolic process	15	0	1.19	0.38843
GO:0035195	gene silencing by miRNA	9	1	0.71	0.39293
GO:0002009	morphogenesis of an epithelium	8	0	0.63	0.39524
GO:0000956	nuclear-transcribed mRNA catabolic proce...	26	0	2.05	0.39638
GO:0044087	regulation of cellular component biogene...	35	3	2.77	0.3971
GO:0051704	multi-organism process	24	1	1.9	0.3999
GO:1901879	regulation of protein depolymerization	9	1	0.71	0.40231
GO:0051495	positive regulation of cytoskeleton orga...	16	2	1.26	0.40236
GO:1902905	positive regulation of supramolecular fi...	16	2	1.26	0.40236
GO:0009628	response to abiotic stimulus	18	6	1.42	0.40239
GO:0033674	positive regulation of kinase activity	10	1	0.79	0.40256
GO:1901565	organonitrogen compound catabolic proces...	154	22	12.17	0.40379
GO:0030154	cell differentiation	59	6	4.66	0.40584
GO:0050896	response to stimulus	838	46	66.23	0.40638
GO:0042454	ribonucleoside catabolic process	6	1	0.47	0.40639
GO:0080090	regulation of primary metabolic process	575	28	45.44	0.40657
GO:0006470	protein dephosphorylation	76	7	6.01	0.40763
GO:0072527	pyrimidine-containing compound metabolic...	20	1	1.58	0.40823
GO:0007281	germ cell development	9	0	0.71	0.40998
GO:0030182	neuron differentiation	25	3	1.98	0.41122
GO:0015698	inorganic anion transport	25	0	1.98	0.41194
GO:0007064	mitotic sister chromatid cohesion	5	0	0.4	0.41209
GO:0012501	programmed cell death	42	4	3.32	0.41244
GO:0031401	positive regulation of protein modificat...	16	1	1.26	0.41366
GO:0043412	macromolecule modification	802	50	63.38	0.41424
GO:0007608	sensory perception of smell	8	0	0.63	0.41442
GO:1901135	carbohydrate derivative metabolic proces...	302	37	23.87	0.41483
GO:0007005	mitochondrion organization	48	14	3.79	0.41635
GO:0019637	organophosphate metabolic process	252	28	19.92	0.41652
GO:0007033	vacuole organization	9	1	0.71	0.41709
GO:0006298	mismatch repair	6	0	0.47	0.41978
GO:0001505	regulation of neurotransmitter levels	9	0	0.71	0.42438
GO:0009072	aromatic amino acid family metabolic pro...	12	0	0.95	0.42438
GO:0008154	actin polymerization or depolymerization	28	3	2.21	0.42525
GO:0043248	proteasome assembly	8	2	0.63	0.4254
GO:0032259	methylation	108	5	8.54	0.42744
GO:0002218	activation of innate immune response	10	0	0.79	0.43211
GO:0006754	ATP biosynthetic process	18	7	1.42	0.43245
GO:0022607	cellular component assembly	215	21	16.99	0.43279
GO:0016126	sterol biosynthetic process	5	0	0.4	0.43345
GO:0008283	cell proliferation	9	0	0.71	0.43862
GO:0016311	dephosphorylation	127	8	10.04	0.44144
GO:0042274	ribosomal small subunit biogenesis	8	1	0.63	0.44261
GO:0046839	phospholipid dephosphorylation	9	0	0.71	0.44305
GO:0072594	establishment of protein localization to...	42	3	3.32	0.4443
GO:0044255	cellular lipid metabolic process	194	11	15.33	0.44672
GO:0016310	phosphorylation	395	33	31.22	0.44754
GO:0000079	regulation of cyclin-dependent protein s...	15	1	1.19	0.44799
GO:0072528	pyrimidine-containing compound biosynthe...	15	1	1.19	0.44854
GO:0035082	axoneme assembly	10	0	0.79	0.44876
GO:0010256	endomembrane system organization	15	1	1.19	0.45076
GO:0009100	glycoprotein metabolic process	79	3	6.24	0.45079
GO:0007009	plasma membrane organization	5	1	0.4	0.45165
GO:0009066	aspartate family amino acid metabolic pr...	14	0	1.11	0.45658
GO:0048699	generation of neurons	27	4	2.13	0.45849
GO:0051128	regulation of cellular component organiz...	63	4	4.98	0.45893
GO:0016071	mRNA metabolic process	154	2	12.17	0.45932
GO:0036265	RNA (guanine-N7)-methylation	6	0	0.47	0.4597
GO:0006090	pyruvate metabolic process	16	5	1.26	0.46074
GO:0006085	acetyl-CoA biosynthetic process	5	0	0.4	0.46077
GO:0043549	regulation of kinase activity	30	2	2.37	0.4636
GO:0044281	small molecule metabolic process	466	56	36.83	0.46702
GO:0030705	cytoskeleton-dependent intracellular tra...	13	1	1.03	0.47365
GO:0006415	translational termination	6	1	0.47	0.47488
GO:0044262	cellular carbohydrate metabolic process	40	3	3.16	0.47588
GO:0006606	protein import into nucleus	9	0	0.71	0.47705
GO:0050909	sensory perception of taste	12	0	0.95	0.47932
GO:0000226	microtubule cytoskeleton organization	46	0	3.64	0.48144
GO:0043044	ATP-dependent chromatin remodeling	8	0	0.63	0.48216
GO:0097035	regulation of membrane lipid distributio...	8	0	0.63	0.4826
GO:0043603	cellular amide metabolic process	329	53	26	0.48741
GO:0045859	regulation of protein kinase activity	29	2	2.29	0.48756
GO:0006448	regulation of translational elongation	7	0	0.55	0.49252
GO:0065004	protein-DNA complex assembly	14	1	1.11	0.49351
GO:0051259	protein oligomerization	16	1	1.26	0.49637
GO:0006644	phospholipid metabolic process	94	2	7.43	0.49658
GO:0010817	regulation of hormone levels	6	0	0.47	0.49761
GO:0045010	actin nucleation	15	2	1.19	0.49823
GO:0009311	oligosaccharide metabolic process	6	0	0.47	0.49868
GO:0065008	regulation of biological quality	154	17	12.17	0.49938
GO:0007031	peroxisome organization	9	0	0.71	0.49985
GO:0034655	nucleobase-containing compound catabolic...	59	3	4.66	0.50058
GO:0006888	ER to Golgi vesicle-mediated transport	17	1	1.34	0.50067
GO:0000470	maturation of LSU-rRNA	5	0	0.4	0.50228
GO:0008299	isoprenoid biosynthetic process	15	2	1.19	0.50237
GO:0019752	carboxylic acid metabolic process	241	24	19.05	0.50402
GO:0009056	catabolic process	308	31	24.34	0.50681
GO:0048513	animal organ development	13	0	1.03	0.512
GO:0006261	DNA-dependent DNA replication	25	2	1.98	0.51205
GO:0051168	nuclear export	16	0	1.26	0.51217
GO:0006575	cellular modified amino acid metabolic p...	26	1	2.05	0.51361
GO:0007219	Notch signaling pathway	15	0	1.19	0.52075
GO:0035725	sodium ion transmembrane transport	19	0	1.5	0.52261
GO:0002181	cytoplasmic translation	19	0	1.5	0.52366
GO:0046395	carboxylic acid catabolic process	34	3	2.69	0.52435
GO:1903311	regulation of mRNA metabolic process	8	0	0.63	0.53117
GO:0018393	internal peptidyl-lysine acetylation	16	0	1.26	0.53302
GO:0019438	aromatic compound biosynthetic process	628	35	49.63	0.53341
GO:0070918	production of small RNA involved in gene...	5	0	0.4	0.53536
GO:0007265	Ras protein signal transduction	22	1	1.74	0.53723
GO:0031327	negative regulation of cellular biosynth...	53	2	4.19	0.54058
GO:0042592	homeostatic process	80	14	6.32	0.54188
GO:0042073	intraciliary transport	7	0	0.55	0.54279
GO:0048522	positive regulation of cellular process	104	7	8.22	0.54315
GO:0070988	demethylation	7	1	0.55	0.5435
GO:0002376	immune system process	27	0	2.13	0.54356
GO:0032508	DNA duplex unwinding	30	3	2.37	0.5444
GO:0050953	sensory perception of light stimulus	18	6	1.42	0.54897
GO:0043632	modification-dependent macromolecule cat...	77	10	6.09	0.54922
GO:0006777	Mo-molybdopterin cofactor biosynthetic p...	5	0	0.4	0.55332
GO:0090305	nucleic acid phosphodiester bond hydroly...	72	3	5.69	0.55347
GO:0044270	cellular nitrogen compound catabolic pro...	71	3	5.61	0.55373
GO:0007218	neuropeptide signaling pathway	24	0	1.9	0.556
GO:0018022	peptidyl-lysine methylation	18	2	1.42	0.55618
GO:0006810	transport	952	48	75.24	0.56034
GO:0031175	neuron projection development	21	3	1.66	0.56075
GO:0043410	positive regulation of MAPK cascade	6	1	0.47	0.56364
GO:0031503	protein complex localization	9	0	0.71	0.56432
GO:0007178	transmembrane receptor protein serine/th...	13	0	1.03	0.56536
GO:0090407	organophosphate biosynthetic process	149	11	11.78	0.56545
GO:0051052	regulation of DNA metabolic process	5	0	0.4	0.56627
GO:1901987	regulation of cell cycle phase transitio...	14	0	1.11	0.56817
GO:0030833	regulation of actin filament polymerizat...	26	3	2.05	0.56875
GO:0009150	purine ribonucleotide metabolic process	93	22	7.35	0.57183
GO:0046854	phosphatidylinositol phosphorylation	14	0	1.11	0.57209
GO:0070286	axonemal dynein complex assembly	9	0	0.71	0.57276
GO:0009611	response to wounding	11	1	0.87	0.5732
GO:0046031	ADP metabolic process	13	5	1.03	0.57797
GO:0042255	ribosome assembly	9	0	0.71	0.57844
GO:0046033	AMP metabolic process	7	0	0.55	0.57863
GO:0000902	cell morphogenesis	26	3	2.05	0.5801
GO:0030071	regulation of mitotic metaphase/anaphase...	9	0	0.71	0.58341
GO:0000165	MAPK cascade	13	1	1.03	0.58555
GO:0050684	regulation of mRNA processing	5	0	0.4	0.58669
GO:0010948	negative regulation of cell cycle proces...	11	0	0.87	0.58702
GO:0050906	detection of stimulus involved in sensor...	10	0	0.79	0.58899
GO:0033043	regulation of organelle organization	54	4	4.27	0.59304
GO:1901605	alpha-amino acid metabolic process	63	5	4.98	0.59515
GO:0016055	Wnt signaling pathway	30	1	2.37	0.59523
GO:0048015	phosphatidylinositol-mediated signaling	5	0	0.4	0.59794
GO:0032509	endosome transport via multivesicular bo...	5	0	0.4	0.59897
GO:0007264	small GTPase mediated signal transductio...	57	4	4.5	0.60014
GO:0055129	L-proline biosynthetic process	5	1	0.4	0.60045
GO:0034637	cellular carbohydrate biosynthetic proce...	9	1	0.71	0.60117
GO:0045017	glycerolipid biosynthetic process	31	0	2.45	0.60198
GO:0006101	citrate metabolic process	22	5	1.74	0.60314
GO:0009083	branched-chain amino acid catabolic proc...	5	0	0.4	0.60455
GO:0071805	potassium ion transmembrane transport	43	0	3.4	0.6077
GO:0016482	cytosolic transport	12	0	0.95	0.61091
GO:0071495	cellular response to endogenous stimulus	19	0	1.5	0.612
GO:0006167	AMP biosynthetic process	5	0	0.4	0.61246
GO:0009141	nucleoside triphosphate metabolic proces...	60	22	4.74	0.61257
GO:0006405	RNA export from nucleus	13	0	1.03	0.61471
GO:1901136	carbohydrate derivative catabolic proces...	20	1	1.58	0.61548
GO:0032787	monocarboxylic acid metabolic process	85	11	6.72	0.61597
GO:1901292	nucleoside phosphate catabolic process	11	1	0.87	0.61617
GO:0016197	endosomal transport	19	0	1.5	0.61689
GO:0006366	transcription from RNA polymerase II pro...	162	5	12.8	0.61814
GO:0072523	purine-containing compound catabolic pro...	9	1	0.71	0.62059
GO:0006091	generation of precursor metabolites and ...	94	33	7.43	0.62064
GO:0044249	cellular biosynthetic process	1232	107	97.37	0.62113
GO:0051056	regulation of small GTPase mediated sign...	24	3	1.9	0.62208
GO:0072350	tricarboxylic acid metabolic process	23	5	1.82	0.62224
GO:0003002	regionalization	8	0	0.63	0.62274
GO:0000097	sulfur amino acid biosynthetic process	10	0	0.79	0.62506
GO:0009395	phospholipid catabolic process	6	0	0.47	0.6254
GO:0034645	cellular macromolecule biosynthetic proc...	936	78	73.97	0.62658
GO:0046128	purine ribonucleoside metabolic process	20	1	1.58	0.62659
GO:0007610	behavior	7	0	0.55	0.62679
GO:0044271	cellular nitrogen compound biosynthetic ...	919	86	72.63	0.62824
GO:0006432	phenylalanyl-tRNA aminoacylation	6	0	0.47	0.62829
GO:0010035	response to inorganic substance	9	0	0.71	0.62904
GO:0006839	mitochondrial transport	22	3	1.74	0.63
GO:1901576	organic substance biosynthetic process	1251	112	98.87	0.63067
GO:0051604	protein maturation	33	4	2.61	0.63069
GO:0048193	Golgi vesicle transport	37	1	2.92	0.63148
GO:0006739	NADP metabolic process	8	0	0.63	0.63942
GO:0019674	NAD metabolic process	7	0	0.55	0.63952
GO:0019359	nicotinamide nucleotide biosynthetic pro...	7	0	0.55	0.63952
GO:0048731	system development	56	4	4.43	0.64067
GO:0006520	cellular amino acid metabolic process	127	8	10.04	0.6425
GO:0006482	protein demethylation	5	1	0.4	0.64386
GO:0032392	DNA geometric change	31	3	2.45	0.64562
GO:0140056	organelle localization by membrane tethe...	11	0	0.87	0.64588
GO:0098656	anion transmembrane transport	28	0	2.21	0.65108
GO:0010033	response to organic substance	42	0	3.32	0.65417
GO:0008152	metabolic process	3961	353	313.05	0.65626
GO:0007163	establishment or maintenance of cell pol...	8	0	0.63	0.65787
GO:0031124	mRNA 3'-end processing	6	0	0.47	0.6579
GO:0098771	inorganic ion homeostasis	26	5	2.05	0.65805
GO:0055080	cation homeostasis	26	5	2.05	0.65805
GO:0045935	positive regulation of nucleobase-contai...	26	1	2.05	0.65898
GO:0048585	negative regulation of response to stimu...	19	3	1.5	0.65902
GO:0006488	dolichol-linked oligosaccharide biosynth...	9	0	0.71	0.65917
GO:0042060	wound healing	9	1	0.71	0.65955
GO:0006950	response to stress	211	8	16.68	0.66009
GO:0042180	cellular ketone metabolic process	13	1	1.03	0.66035
GO:0006897	endocytosis	35	0	2.77	0.66038
GO:0044092	negative regulation of molecular functio...	59	4	4.66	0.66188
GO:0043043	peptide biosynthetic process	288	52	22.76	0.66248
GO:0046942	carboxylic acid transport	15	0	1.19	0.66326
GO:1901566	organonitrogen compound biosynthetic pro...	541	70	42.76	0.66395
GO:0006241	CTP biosynthetic process	6	0	0.47	0.66405
GO:0006352	DNA-templated transcription, initiation	31	1	2.45	0.66436
GO:1901606	alpha-amino acid catabolic process	23	3	1.82	0.66511
GO:0043297	apical junction assembly	5	0	0.4	0.66622
GO:0016043	cellular component organization	568	46	44.89	0.66724
GO:0006665	sphingolipid metabolic process	19	0	1.5	0.66897
GO:0006879	cellular iron ion homeostasis	9	2	0.71	0.67071
GO:0032446	protein modification by small protein co...	100	5	7.9	0.67129
GO:0006749	glutathione metabolic process	9	1	0.71	0.675
GO:0042219	cellular modified amino acid catabolic p...	8	1	0.63	0.67536
GO:0006402	mRNA catabolic process	33	1	2.61	0.67841
GO:0022008	neurogenesis	30	4	2.37	0.67974
GO:0071702	organic substance transport	324	13	25.61	0.67986
GO:0048285	organelle fission	32	1	2.53	0.68033
GO:1990748	cellular detoxification	32	5	2.53	0.68321
GO:0018216	peptidyl-arginine methylation	12	0	0.95	0.68385
GO:0044265	cellular macromolecule catabolic process	128	14	10.12	0.68619
GO:0043547	positive regulation of GTPase activity	44	5	3.48	0.68651
GO:0010466	negative regulation of peptidase activit...	46	3	3.64	0.68836
GO:0055085	transmembrane transport	528	30	41.73	0.6889
GO:0045087	innate immune response	21	0	1.66	0.68937
GO:0071897	DNA biosynthetic process	12	2	0.95	0.68991
GO:1901990	regulation of mitotic cell cycle phase t...	13	0	1.03	0.69142
GO:0070588	calcium ion transmembrane transport	26	2	2.05	0.6915
GO:0006518	peptide metabolic process	305	53	24.11	0.69151
GO:0018205	peptidyl-lysine modification	43	3	3.4	0.69162
GO:0006635	fatty acid beta-oxidation	8	0	0.63	0.69421
GO:0030001	metal ion transport	133	7	10.51	0.69466
GO:0006098	pentose-phosphate shunt	6	0	0.47	0.69508
GO:0006400	tRNA modification	38	3	3	0.6953
GO:0006465	signal peptide processing	6	0	0.47	0.69583
GO:0050911	detection of chemical stimulus involved ...	6	0	0.47	0.70105
GO:1901568	fatty acid derivative metabolic process	8	1	0.63	0.70144
GO:0045937	positive regulation of phosphate metabol...	14	1	1.11	0.70256
GO:0035304	regulation of protein dephosphorylation	13	0	1.03	0.70265
GO:0006357	regulation of transcription from RNA pol...	138	5	10.91	0.7033
GO:0032367	intracellular cholesterol transport	8	1	0.63	0.70647
GO:0006614	SRP-dependent cotranslational protein ta...	9	0	0.71	0.71059
GO:0009116	nucleoside metabolic process	35	2	2.77	0.71121
GO:0044772	mitotic cell cycle phase transition	14	0	1.11	0.71186
GO:0070838	divalent metal ion transport	42	3	3.32	0.71281
GO:0045216	cell-cell junction organization	7	0	0.55	0.71284
GO:2001251	negative regulation of chromosome organi...	8	0	0.63	0.71296
GO:0009064	glutamine family amino acid metabolic pr...	20	3	1.58	0.71307
GO:0015672	monovalent inorganic cation transport	115	9	9.09	0.71399
GO:0016573	histone acetylation	15	0	1.19	0.71637
GO:0007062	sister chromatid cohesion	11	0	0.87	0.71842
GO:0006333	chromatin assembly or disassembly	11	0	0.87	0.71854
GO:0140013	meiotic nuclear division	6	0	0.47	0.71882
GO:0035282	segmentation	5	0	0.4	0.71891
GO:0006890	retrograde vesicle-mediated transport, G...	5	0	0.4	0.719
GO:0006672	ceramide metabolic process	5	0	0.4	0.71927
GO:0015914	phospholipid transport	11	0	0.87	0.72067
GO:0000278	mitotic cell cycle	46	1	3.64	0.72172
GO:0035194	posttranscriptional gene silencing by RN...	17	2	1.34	0.7228
GO:0006144	purine nucleobase metabolic process	9	0	0.71	0.72403
GO:0008610	lipid biosynthetic process	113	10	8.93	0.72787
GO:0043408	regulation of MAPK cascade	8	1	0.63	0.72934
GO:0007266	Rho protein signal transduction	11	0	0.87	0.73009
GO:0023061	signal release	6	0	0.47	0.73112
GO:0006260	DNA replication	73	5	5.77	0.733
GO:1901617	organic hydroxy compound biosynthetic pr...	23	1	1.82	0.73327
GO:0046112	nucleobase biosynthetic process	8	1	0.63	0.73617
GO:0006334	nucleosome assembly	10	0	0.79	0.73775
GO:0030030	cell projection organization	68	4	5.37	0.7384
GO:0046434	organophosphate catabolic process	24	1	1.9	0.73904
GO:0006418	tRNA aminoacylation for protein translat...	42	1	3.32	0.73926
GO:0007271	synaptic transmission, cholinergic	12	0	0.95	0.74075
GO:0006836	neurotransmitter transport	9	0	0.71	0.74129
GO:0045786	negative regulation of cell cycle	26	1	2.05	0.7421
GO:0043436	oxoacid metabolic process	246	24	19.44	0.74262
GO:0030203	glycosaminoglycan metabolic process	11	0	0.87	0.74347
GO:0016042	lipid catabolic process	47	1	3.71	0.74405
GO:0008643	carbohydrate transport	12	0	0.95	0.74608
GO:0090503	RNA phosphodiester bond hydrolysis, exon...	10	1	0.79	0.74652
GO:0071616	acyl-CoA biosynthetic process	6	0	0.47	0.7469
GO:1901071	glucosamine-containing compound metaboli...	46	8	3.64	0.74728
GO:0007051	spindle organization	5	0	0.4	0.75171
GO:0006493	protein O-linked glycosylation	10	1	0.79	0.75171
GO:0051494	negative regulation of cytoskeleton orga...	13	1	1.03	0.75329
GO:0051346	negative regulation of hydrolase activit...	53	4	4.19	0.75329
GO:0032781	positive regulation of ATPase activity	5	1	0.4	0.75406
GO:0007029	endoplasmic reticulum organization	5	0	0.4	0.75458
GO:0051170	nuclear import	10	0	0.79	0.75616
GO:0050658	RNA transport	27	1	2.13	0.75687
GO:0009253	peptidoglycan catabolic process	6	0	0.47	0.75731
GO:0035966	response to topologically incorrect prot...	5	0	0.4	0.75822
GO:0036065	fucosylation	6	0	0.47	0.75826
GO:0006694	steroid biosynthetic process	6	0	0.47	0.75858
GO:0034613	cellular protein localization	158	9	12.49	0.75891
GO:0007020	microtubule nucleation	6	0	0.47	0.7596
GO:0061025	membrane fusion	12	0	0.95	0.76007
GO:0006891	intra-Golgi vesicle-mediated transport	5	0	0.4	0.76038
GO:0043543	protein acylation	18	0	1.42	0.76372
GO:0006497	protein lipidation	23	0	1.82	0.76375
GO:0045893	positive regulation of transcription, DN...	16	1	1.26	0.76452
GO:0051298	centrosome duplication	7	0	0.55	0.76622
GO:0006265	DNA topological change	5	0	0.4	0.76726
GO:0016570	histone modification	53	1	4.19	0.76758
GO:0031929	TOR signaling	16	1	1.26	0.7681
GO:0051169	nuclear transport	36	0	2.85	0.76881
GO:0140053	mitochondrial gene expression	13	1	1.03	0.76901
GO:0006732	coenzyme metabolic process	75	7	5.93	0.77198
GO:0006544	glycine metabolic process	6	1	0.47	0.77206
GO:0032366	intracellular sterol transport	9	1	0.71	0.77297
GO:0018193	peptidyl-amino acid modification	134	6	10.59	0.77537
GO:0001510	RNA methylation	40	2	3.16	0.77552
GO:1902358	sulfate transmembrane transport	9	0	0.71	0.77647
GO:0060271	cilium assembly	33	1	2.61	0.78021
GO:0071363	cellular response to growth factor stimu...	8	0	0.63	0.78074
GO:0035303	regulation of dephosphorylation	14	0	1.11	0.78079
GO:0006730	one-carbon metabolic process	11	0	0.87	0.78223
GO:0009605	response to external stimulus	35	9	2.77	0.78259
GO:0031167	rRNA methylation	7	1	0.55	0.78265
GO:0006396	RNA processing	286	9	22.6	0.7832
GO:0097164	ammonium ion metabolic process	13	0	1.03	0.78586
GO:0050482	arachidonic acid secretion	8	0	0.63	0.78631
GO:0016236	macroautophagy	5	0	0.4	0.78974
GO:0006892	post-Golgi vesicle-mediated transport	5	0	0.4	0.7914
GO:0000154	rRNA modification	10	1	0.79	0.79176
GO:0007154	cell communication	612	31	48.37	0.79305
GO:0006534	cysteine metabolic process	6	0	0.47	0.79436
GO:0034314	Arp2/3 complex-mediated actin nucleation	11	1	0.87	0.79461
GO:0046039	GTP metabolic process	5	0	0.4	0.79529
GO:0045860	positive regulation of protein kinase ac...	9	1	0.71	0.79605
GO:0006084	acetyl-CoA metabolic process	11	0	0.87	0.79684
GO:0007165	signal transduction	588	31	46.47	0.79786
GO:0032147	activation of protein kinase activity	5	1	0.4	0.79809
GO:0009070	serine family amino acid biosynthetic pr...	9	1	0.71	0.79832
GO:0045185	maintenance of protein location	5	0	0.4	0.79834
GO:0006182	cGMP biosynthetic process	13	0	1.03	0.80183
GO:0015031	protein transport	223	10	17.62	0.80379
GO:0006631	fatty acid metabolic process	58	6	4.58	0.80427
GO:0006913	nucleocytoplasmic transport	35	0	2.77	0.80462
GO:0000077	DNA damage checkpoint	10	0	0.79	0.80468
GO:0010638	positive regulation of organelle organiz...	20	2	1.58	0.80601
GO:0008033	tRNA processing	64	4	5.06	0.80625
GO:0016180	snRNA processing	8	0	0.63	0.80658
GO:0000122	negative regulation of transcription fro...	8	0	0.63	0.80696
GO:0007205	protein kinase C-activating G-protein co...	5	0	0.4	0.80724
GO:0043087	regulation of GTPase activity	46	5	3.64	0.80806
GO:0006826	iron ion transport	7	1	0.55	0.81009
GO:1905515	non-motile cilium assembly	5	0	0.4	0.81015
GO:0009314	response to radiation	14	6	1.11	0.81072
GO:0080134	regulation of response to stress	17	0	1.34	0.8108
GO:0051260	protein homooligomerization	13	0	1.03	0.81135
GO:0000184	nuclear-transcribed mRNA catabolic proce...	11	0	0.87	0.81155
GO:0009084	glutamine family amino acid biosynthetic...	9	1	0.71	0.812
GO:0042559	pteridine-containing compound biosynthet...	6	1	0.47	0.81362
GO:0006555	methionine metabolic process	8	0	0.63	0.8143
GO:0009132	nucleoside diphosphate metabolic process	19	5	1.5	0.81725
GO:0043086	negative regulation of catalytic activit...	58	4	4.58	0.81795
GO:0009147	pyrimidine nucleoside triphosphate metab...	7	0	0.55	0.81846
GO:0015850	organic hydroxy compound transport	10	1	0.79	0.81954
GO:0071902	positive regulation of protein serine/th...	6	1	0.47	0.81974
GO:0030036	actin cytoskeleton organization	52	5	4.11	0.82124
GO:0006071	glycerol metabolic process	6	1	0.47	0.82169
GO:0044273	sulfur compound catabolic process	7	1	0.55	0.82183
GO:1902476	chloride transmembrane transport	10	0	0.79	0.82337
GO:0009108	coenzyme biosynthetic process	41	2	3.24	0.82421
GO:0046174	polyol catabolic process	11	1	0.87	0.82439
GO:0090502	RNA phosphodiester bond hydrolysis, endo...	19	2	1.5	0.8245
GO:0070925	organelle assembly	58	2	4.58	0.82473
GO:0043414	macromolecule methylation	78	4	6.16	0.825
GO:0007283	spermatogenesis	6	0	0.47	0.82571
GO:0005996	monosaccharide metabolic process	34	9	2.69	0.82698
GO:0016579	protein deubiquitination	36	2	2.85	0.82748
GO:0006801	superoxide metabolic process	10	0	0.79	0.82771
GO:0008380	RNA splicing	86	0	6.8	0.82999
GO:0009074	aromatic amino acid family catabolic pro...	8	0	0.63	0.83053
GO:0006576	cellular biogenic amine metabolic proces...	13	0	1.03	0.83147
GO:0042752	regulation of circadian rhythm	5	0	0.4	0.83181
GO:0030433	ubiquitin-dependent ERAD pathway	6	0	0.47	0.83211
GO:0050793	regulation of developmental process	9	0	0.71	0.83232
GO:0097502	mannosylation	15	1	1.19	0.8361
GO:0000290	deadenylation-dependent decapping of nuc...	6	0	0.47	0.83654
GO:0005975	carbohydrate metabolic process	187	21	14.78	0.83671
GO:0001522	pseudouridine synthesis	13	1	1.03	0.83762
GO:0015711	organic anion transport	45	0	3.56	0.83942
GO:0043631	RNA polyadenylation	5	0	0.4	0.84026
GO:0006139	nucleobase-containing compound metabolic...	1241	66	98.08	0.84028
GO:0051693	actin filament capping	8	1	0.63	0.84161
GO:1903506	regulation of nucleic acid-templated tra...	423	17	33.43	0.84277
GO:0000070	mitotic sister chromatid segregation	23	0	1.82	0.84319
GO:0006487	protein N-linked glycosylation	6	0	0.47	0.84363
GO:0044272	sulfur compound biosynthetic process	29	0	2.29	0.84376
GO:0009653	anatomical structure morphogenesis	42	4	3.32	0.84475
GO:0007094	mitotic spindle assembly checkpoint	7	0	0.55	0.84511
GO:0008652	cellular amino acid biosynthetic process	28	2	2.21	0.84663
GO:0051649	establishment of localization in cell	227	10	17.94	0.84683
GO:0009966	regulation of signal transduction	79	9	6.24	0.84742
GO:0046903	secretion	36	1	2.85	0.84843
GO:0015909	long-chain fatty acid transport	9	0	0.71	0.84972
GO:0006289	nucleotide-excision repair	17	0	1.34	0.85047
GO:0006367	transcription initiation from RNA polyme...	13	0	1.03	0.85218
GO:0007088	regulation of mitotic nuclear division	10	0	0.79	0.8553
GO:0019318	hexose metabolic process	32	9	2.53	0.85737
GO:0030149	sphingolipid catabolic process	7	0	0.55	0.85788
GO:0006563	L-serine metabolic process	6	0	0.47	0.86063
GO:0071407	cellular response to organic cyclic comp...	9	0	0.71	0.86289
GO:0009060	aerobic respiration	22	5	1.74	0.86338
GO:0033554	cellular response to stress	156	5	12.33	0.86553
GO:0009165	nucleotide biosynthetic process	83	9	6.56	0.8673
GO:0000245	spliceosomal complex assembly	6	0	0.47	0.86963
GO:0006221	pyrimidine nucleotide biosynthetic proce...	14	1	1.11	0.87274
GO:0009987	cellular process	3856	301	304.75	0.87274
GO:0044275	cellular carbohydrate catabolic process	6	1	0.47	0.87455
GO:0016567	protein ubiquitination	90	5	7.11	0.87575
GO:0034976	response to endoplasmic reticulum stress	7	0	0.55	0.87663
GO:0034470	ncRNA processing	122	6	9.64	0.87697
GO:0006506	GPI anchor biosynthetic process	22	0	1.74	0.87721
GO:0046856	phosphatidylinositol dephosphorylation	8	0	0.63	0.87871
GO:0043484	regulation of RNA splicing	7	0	0.55	0.87921
GO:0006661	phosphatidylinositol biosynthetic proces...	25	0	1.98	0.88395
GO:0006281	DNA repair	121	5	9.56	0.88506
GO:0009057	macromolecule catabolic process	142	17	11.22	0.88633
GO:0006189	de novo' IMP biosynthetic process	6	0	0.47	0.88656
GO:0043101	purine-containing compound salvage	5	0	0.4	0.88775
GO:0046129	purine ribonucleoside biosynthetic proce...	10	0	0.79	0.88824
GO:0006270	DNA replication initiation	12	1	0.95	0.88857
GO:0018342	protein prenylation	7	0	0.55	0.89111
GO:0046835	carbohydrate phosphorylation	9	0	0.71	0.89131
GO:0046165	alcohol biosynthetic process	14	1	1.11	0.892
GO:0006886	intracellular protein transport	139	6	10.99	0.89233
GO:0008654	phospholipid biosynthetic process	49	2	3.87	0.89321
GO:0019439	aromatic compound catabolic process	77	4	6.09	0.89478
GO:0034204	lipid translocation	5	0	0.4	0.89516
GO:0006310	DNA recombination	35	3	2.77	0.89529
GO:0006383	transcription from RNA polymerase III pr...	11	0	0.87	0.89587
GO:0034660	ncRNA metabolic process	170	7	13.44	0.89646
GO:0042254	ribosome biogenesis	80	4	6.32	0.89812
GO:0010970	transport along microtubule	11	0	0.87	0.89868
GO:0009152	purine ribonucleotide biosynthetic proce...	58	7	4.58	0.89888
GO:0000302	response to reactive oxygen species	8	0	0.63	0.90001
GO:0006955	immune response	25	0	1.98	0.90135
GO:0042127	regulation of cell proliferation	6	0	0.47	0.90154
GO:0010628	positive regulation of gene expression	21	1	1.66	0.90404
GO:0031328	positive regulation of cellular biosynth...	30	1	2.37	0.90438
GO:0010557	positive regulation of macromolecule bio...	30	1	2.37	0.90438
GO:0031123	RNA 3'-end processing	11	0	0.87	0.90467
GO:1901360	organic cyclic compound metabolic proces...	1304	75	103.06	0.90481
GO:0006725	cellular aromatic compound metabolic pro...	1286	72	101.64	0.90552
GO:0045944	positive regulation of transcription fro...	11	1	0.87	0.90558
GO:0042147	retrograde transport, endosome to Golgi	9	0	0.71	0.90832
GO:1902532	negative regulation of intracellular sig...	5	0	0.4	0.90916
GO:0006807	nitrogen compound metabolic process	2921	231	230.86	0.9099
GO:1902904	negative regulation of supramolecular fi...	11	1	0.87	0.90991
GO:0043604	amide biosynthetic process	296	52	23.39	0.91102
GO:0032501	multicellular organismal process	231	16	18.26	0.91108
GO:0051180	vitamin transport	7	0	0.55	0.91159
GO:0002098	tRNA wobble uridine modification	11	1	0.87	0.91179
GO:0007155	cell adhesion	76	6	6.01	0.91193
GO:0018208	peptidyl-proline modification	29	0	2.29	0.91236
GO:0051028	mRNA transport	24	1	1.9	0.91287
GO:0000398	mRNA splicing, via spliceosome	52	0	4.11	0.91415
GO:0006355	regulation of transcription, DNA-templat...	412	16	32.56	0.91457
GO:0072348	sulfur compound transport	11	0	0.87	0.91581
GO:0006354	DNA-templated transcription, elongation	14	0	1.11	0.91612
GO:0032879	regulation of localization	38	0	3	0.91652
GO:0044093	positive regulation of molecular functio...	82	7	6.48	0.91707
GO:0051345	positive regulation of hydrolase activit...	50	6	3.95	0.91842
GO:0052547	regulation of peptidase activity	47	3	3.71	0.91876
GO:0006904	vesicle docking involved in exocytosis	8	0	0.63	0.91956
GO:0006165	nucleoside diphosphate phosphorylation	15	5	1.19	0.92095
GO:0006508	proteolysis	661	54	52.24	0.92172
GO:0032270	positive regulation of cellular protein ...	25	3	1.98	0.92235
GO:0042246	tissue regeneration	8	1	0.63	0.92277
GO:0072522	purine-containing compound biosynthetic ...	61	7	4.82	0.92395
GO:0006760	folic acid-containing compound metabolic...	8	0	0.63	0.92464
GO:0045892	negative regulation of transcription, DN...	30	0	2.37	0.92484
GO:0006974	cellular response to DNA damage stimulus	134	5	10.59	0.92484
GO:0042325	regulation of phosphorylation	35	2	2.77	0.92599
GO:0051640	organelle localization	25	0	1.98	0.92677
GO:0016255	attachment of GPI anchor to protein	5	0	0.4	0.928
GO:0006338	chromatin remodeling	21	0	1.66	0.92845
GO:0006650	glycerophospholipid metabolic process	55	0	4.35	0.92877
GO:0032222	regulation of synaptic transmission, cho...	11	0	0.87	0.92899
GO:0030431	sleep	11	0	0.87	0.92899
GO:1903818	positive regulation of voltage-gated pot...	11	0	0.87	0.92899
GO:0006388	tRNA splicing, via endonucleolytic cleav...	5	0	0.4	0.93095
GO:1901700	response to oxygen-containing compound	16	0	1.26	0.93292
GO:0035246	peptidyl-arginine N-methylation	10	0	0.79	0.93457
GO:0016052	carbohydrate catabolic process	20	6	1.58	0.93596
GO:0003341	cilium movement	6	0	0.47	0.93962
GO:0006171	cAMP biosynthetic process	6	0	0.47	0.93981
GO:0009206	purine ribonucleoside triphosphate biosy...	21	7	1.66	0.94027
GO:0006914	autophagy	24	0	1.9	0.94332
GO:0009755	hormone-mediated signaling pathway	8	0	0.63	0.94332
GO:1901070	guanosine-containing compound biosynthet...	5	0	0.4	0.94366
GO:0051726	regulation of cell cycle	62	2	4.9	0.94372
GO:0007098	centrosome cycle	8	0	0.63	0.94595
GO:0051301	cell division	56	1	4.43	0.94614
GO:0080135	regulation of cellular response to stres...	5	0	0.4	0.94658
GO:0051650	establishment of vesicle localization	7	0	0.55	0.94688
GO:0031400	negative regulation of protein modificat...	8	0	0.63	0.94762
GO:0045936	negative regulation of phosphate metabol...	8	0	0.63	0.94762
GO:0033044	regulation of chromosome organization	12	0	0.95	0.9493
GO:0006637	acyl-CoA metabolic process	13	0	1.03	0.95219
GO:0045934	negative regulation of nucleobase-contai...	38	1	3	0.95403
GO:2000113	negative regulation of cellular macromol...	45	1	3.56	0.95422
GO:0009168	purine ribonucleoside monophosphate bios...	33	7	2.61	0.95423
GO:0031570	DNA integrity checkpoint	11	0	0.87	0.95425
GO:0006464	cellular protein modification process	724	44	57.22	0.95529
GO:0071310	cellular response to organic substance	29	0	2.29	0.95542
GO:0016458	gene silencing	39	2	3.08	0.95615
GO:0040029	regulation of gene expression, epigeneti...	20	2	1.58	0.95626
GO:0060070	canonical Wnt signaling pathway	9	0	0.71	0.95714
GO:0006874	cellular calcium ion homeostasis	7	0	0.55	0.9576
GO:0010951	negative regulation of endopeptidase act...	42	2	3.32	0.9583
GO:0006814	sodium ion transport	26	0	2.05	0.95883
GO:0009130	pyrimidine nucleoside monophosphate bios...	7	1	0.55	0.95915
GO:0051130	positive regulation of cellular componen...	22	2	1.74	0.96055
GO:0043244	regulation of protein complex disassembl...	11	1	0.87	0.9607
GO:0046467	membrane lipid biosynthetic process	23	0	1.82	0.96076
GO:0006401	RNA catabolic process	40	1	3.16	0.96124
GO:0048468	cell development	34	3	2.69	0.96171
GO:0055082	cellular chemical homeostasis	23	5	1.82	0.96232
GO:1903508	positive regulation of nucleic acid-temp...	25	1	1.98	0.96436
GO:0098732	macromolecule deacylation	7	0	0.55	0.9655
GO:0017148	negative regulation of translation	14	1	1.11	0.96568
GO:0006446	regulation of translational initiation	5	0	0.4	0.96579
GO:0048523	negative regulation of cellular process	165	10	13.04	0.96721
GO:1902533	positive regulation of intracellular sig...	16	2	1.26	0.96791
GO:0006364	rRNA processing	49	2	3.87	0.96793
GO:0060828	regulation of canonical Wnt signaling pa...	8	0	0.63	0.96819
GO:0051336	regulation of hydrolase activity	113	10	8.93	0.96898
GO:0032006	regulation of TOR signaling	12	1	0.95	0.97054
GO:0006351	transcription, DNA-templated	481	18	38.01	0.97074
GO:0097435	supramolecular fiber organization	43	4	3.4	0.97192
GO:0007399	nervous system development	45	4	3.56	0.97241
GO:0030488	tRNA methylation	11	0	0.87	0.97366
GO:0048278	vesicle docking	9	0	0.71	0.97442
GO:0030261	chromosome condensation	7	0	0.55	0.97458
GO:0065002	intracellular protein transmembrane tran...	15	3	1.19	0.97461
GO:0006612	protein targeting to membrane	12	0	0.95	0.97464
GO:0031399	regulation of protein modification proce...	49	2	3.87	0.97476
GO:0006397	mRNA processing	126	1	9.96	0.97499
GO:0006188	IMP biosynthetic process	7	0	0.55	0.97527
GO:0006952	defense response	23	0	1.82	0.97546
GO:0006325	chromatin organization	97	2	7.67	0.97604
GO:0006399	tRNA metabolic process	110	5	8.69	0.97622
GO:0009967	positive regulation of signal transducti...	22	2	1.74	0.97629
GO:0110053	regulation of actin filament organizatio...	27	3	2.13	0.97702
GO:0000027	ribosomal large subunit assembly	5	0	0.4	0.97863
GO:0090501	RNA phosphodiester bond hydrolysis	37	3	2.92	0.97875
GO:0046653	tetrahydrofolate metabolic process	7	0	0.55	0.97918
GO:0006406	mRNA export from nucleus	10	0	0.79	0.97979
GO:0042398	cellular modified amino acid biosyntheti...	10	0	0.79	0.97983
GO:0050877	nervous system process	43	6	3.4	0.9804
GO:0009101	glycoprotein biosynthetic process	75	3	5.93	0.98051
GO:0006596	polyamine biosynthetic process	10	0	0.79	0.98068
GO:0006476	protein deacetylation	5	0	0.4	0.98091
GO:0046578	regulation of Ras protein signal transdu...	16	1	1.26	0.98111
GO:0048518	positive regulation of biological proces...	116	7	9.17	0.98162
GO:0046394	carboxylic acid biosynthetic process	75	8	5.93	0.98202
GO:0045047	protein targeting to ER	11	0	0.87	0.98302
GO:0009081	branched-chain amino acid metabolic proc...	7	0	0.55	0.98313
GO:0016192	vesicle-mediated transport	161	4	12.72	0.98352
GO:0009063	cellular amino acid catabolic process	25	3	1.98	0.98428
GO:0044237	cellular metabolic process	2742	217	216.71	0.98454
GO:0042168	heme metabolic process	14	4	1.11	0.98482
GO:0048878	chemical homeostasis	31	5	2.45	0.98489
GO:0070887	cellular response to chemical stimulus	65	5	5.14	0.98538
GO:0006812	cation transport	189	16	14.94	0.98642
GO:0009124	nucleoside monophosphate biosynthetic pr...	42	8	3.32	0.98647
GO:0046474	glycerophospholipid biosynthetic process	30	0	2.37	0.98673
GO:0051276	chromosome organization	168	5	13.28	0.98702
GO:0000288	nuclear-transcribed mRNA catabolic proce...	9	0	0.71	0.98729
GO:0071900	regulation of protein serine/threonine k...	24	2	1.9	0.98763
GO:0022618	ribonucleoprotein complex assembly	42	0	3.32	0.98774
GO:0006457	protein folding	47	0	3.71	0.98834
GO:0009435	NAD biosynthetic process	5	0	0.4	0.98899
GO:0006490	oligosaccharide-lipid intermediate biosy...	10	0	0.79	0.98926
GO:0032886	regulation of microtubule-based process	8	0	0.63	0.98966
GO:0006473	protein acetylation	17	0	1.34	0.99035
GO:0051656	establishment of organelle localization	13	0	1.03	0.99064
GO:0016571	histone methylation	16	1	1.26	0.99071
GO:0006486	protein glycosylation	73	3	5.77	0.99088
GO:0044089	positive regulation of cellular componen...	17	2	1.34	0.99161
GO:0006461	protein complex assembly	97	15	7.67	0.99228
GO:0009117	nucleotide metabolic process	137	25	10.83	0.9931
GO:0016072	rRNA metabolic process	50	2	3.95	0.99427
GO:0009890	negative regulation of biosynthetic proc...	55	2	4.35	0.99458
GO:0019941	modification-dependent protein catabolic...	76	10	6.01	0.99476
GO:0034599	cellular response to oxidative stress	8	0	0.63	0.99478
GO:0030042	actin filament depolymerization	9	1	0.71	0.99502
GO:0044283	small molecule biosynthetic process	109	15	8.61	0.99508
GO:0072525	pyridine-containing compound biosyntheti...	9	0	0.71	0.99525
GO:0042273	ribosomal large subunit biogenesis	12	0	0.95	0.99531
GO:0080009	mRNA methylation	6	0	0.47	0.99542
GO:0009263	deoxyribonucleotide biosynthetic process	5	0	0.4	0.99577
GO:0015867	ATP transport	17	0	1.34	0.99603
GO:0015718	monocarboxylic acid transport	11	0	0.87	0.99619
GO:0006813	potassium ion transport	46	0	3.64	0.9964
GO:0016485	protein processing	20	0	1.58	0.99641
GO:0071806	protein transmembrane transport	16	3	1.26	0.99643
GO:0007229	integrin-mediated signaling pathway	7	0	0.55	0.99658
GO:0071426	ribonucleoprotein complex export from nu...	12	0	0.95	0.99691
GO:0006996	organelle organization	401	30	31.69	0.9975
GO:0043094	cellular metabolic compound salvage	13	0	1.03	0.99762
GO:0048511	rhythmic process	18	0	1.42	0.9977
GO:0043241	protein complex disassembly	19	3	1.5	0.99797
GO:0007623	circadian rhythm	6	0	0.47	0.99801
GO:1901564	organonitrogen compound metabolic proces...	1944	191	153.64	0.99816
GO:0043666	regulation of phosphoprotein phosphatase...	11	0	0.87	0.99825
GO:0032774	RNA biosynthetic process	494	18	39.04	0.99834
GO:0002224	toll-like receptor signaling pathway	9	0	0.71	0.99868
GO:0023052	signaling	612	31	48.37	0.99904
GO:1902531	regulation of intracellular signal trans...	46	5	3.64	0.99933
GO:0006790	sulfur compound metabolic process	57	4	4.5	0.99948
GO:0051235	maintenance of location	8	0	0.63	0.99961
GO:0006220	pyrimidine nucleotide metabolic process	15	1	1.19	0.99961
GO:0010876	lipid localization	53	3	4.19	0.99974
GO:0018212	peptidyl-tyrosine modification	32	3	2.53	0.99983
GO:0015833	peptide transport	225	10	17.78	0.99987
GO:0050789	regulation of biological process	1357	77	107.25	0.9999
GO:0007267	cell-cell signaling	63	1	4.98	0.99991
GO:0009069	serine family amino acid metabolic proce...	15	2	1.19	1
GO:0051493	regulation of cytoskeleton organization	36	4	2.85	1
GO:0009199	ribonucleoside triphosphate metabolic pr...	58	22	4.58	1
GO:0072655	establishment of protein localization to...	14	3	1.11	1
GO:0030041	actin filament polymerization	26	3	2.05	1
GO:0043102	amino acid salvage	6	0	0.47	1
GO:0030031	cell projection assembly	33	1	2.61	1
GO:0009161	ribonucleoside monophosphate metabolic p...	71	23	5.61	1
GO:0009163	nucleoside biosynthetic process	16	1	1.26	1
GO:0009164	nucleoside catabolic process	6	1	0.47	1
GO:0022412	cellular process involved in reproductio...	9	0	0.71	1
GO:0022414	reproductive process	32	2	2.53	1
GO:0070085	glycosylation	79	3	6.24	1
GO:0000819	sister chromatid segregation	27	0	2.13	1
GO:0016053	organic acid biosynthetic process	75	8	5.93	1
GO:0016054	organic acid catabolic process	34	3	2.69	1
GO:2001141	regulation of RNA biosynthetic process	423	17	33.43	1
GO:0009185	ribonucleoside diphosphate metabolic pro...	14	5	1.11	1
GO:0009187	cyclic nucleotide metabolic process	22	1	1.74	1
GO:0000303	response to superoxide	7	0	0.55	1
GO:0030003	cellular cation homeostasis	20	5	1.58	1
GO:0033559	unsaturated fatty acid metabolic process	6	1	0.47	1
GO:0046068	cGMP metabolic process	13	0	1.03	1
GO:0000305	response to oxygen radical	7	0	0.55	1
GO:0042391	regulation of membrane potential	9	0	0.71	1
GO:0032269	negative regulation of cellular protein ...	68	4	5.37	1
GO:0007091	metaphase/anaphase transition of mitotic...	9	0	0.71	1
GO:0009173	pyrimidine ribonucleoside monophosphate ...	5	1	0.4	1
GO:0009174	pyrimidine ribonucleoside monophosphate ...	5	1	0.4	1
GO:0090662	ATP hydrolysis coupled transmembrane tra...	17	1	1.34	1
GO:0071715	icosanoid transport	8	0	0.63	1
GO:0046501	protoporphyrinogen IX metabolic process	7	1	0.55	1
GO:0016073	snRNA metabolic process	8	0	0.63	1
GO:0006213	pyrimidine nucleoside metabolic process	11	1	0.87	1
GO:0009123	nucleoside monophosphate metabolic proce...	77	23	6.09	1
GO:0007409	axonogenesis	20	3	1.58	1
GO:0009126	purine nucleoside monophosphate metaboli...	65	22	5.14	1
GO:0009127	purine nucleoside monophosphate biosynth...	33	7	2.61	1
GO:1901381	positive regulation of potassium ion tra...	11	0	0.87	1
GO:0009129	pyrimidine nucleoside monophosphate meta...	7	1	0.55	1
GO:0000910	cytokinesis	11	0	0.87	1
GO:0043266	regulation of potassium ion transport	11	0	0.87	1
GO:0043268	positive regulation of potassium ion tra...	11	0	0.87	1
GO:0009112	nucleobase metabolic process	14	1	1.11	1
GO:0043269	regulation of ion transport	31	0	2.45	1
GO:1902221	erythrose 4-phosphate/phosphoenolpyruvat...	5	0	0.4	1
GO:1902222	erythrose 4-phosphate/phosphoenolpyruvat...	5	0	0.4	1
GO:0032271	regulation of protein polymerization	26	3	2.05	1
GO:0032272	negative regulation of protein polymeriz...	10	1	0.79	1
GO:0032273	positive regulation of protein polymeriz...	15	2	1.19	1
GO:0009119	ribonucleoside metabolic process	28	2	2.21	1
GO:0022406	membrane docking	11	0	0.87	1
GO:1901379	regulation of potassium ion transmembran...	11	0	0.87	1
GO:0009142	nucleoside triphosphate biosynthetic pro...	24	7	1.9	1
GO:0009144	purine nucleoside triphosphate metabolic...	55	22	4.35	1
GO:0009145	purine nucleoside triphosphate biosynthe...	21	7	1.66	1
GO:0009148	pyrimidine nucleoside triphosphate biosy...	6	0	0.47	1
GO:0048232	male gamete generation	6	0	0.47	1
GO:0098534	centriole assembly	6	0	0.47	1
GO:0009135	purine nucleoside diphosphate metabolic ...	14	5	1.11	1
GO:0043270	positive regulation of ion transport	11	0	0.87	1
GO:0031323	regulation of cellular metabolic process	577	26	45.6	1
GO:1905114	cell surface receptor signaling pathway ...	39	1	3.08	1
GO:0031324	negative regulation of cellular metaboli...	107	5	8.46	1
GO:0120031	plasma membrane bounded cell projection ...	33	1	2.61	1
GO:0031325	positive regulation of cellular metaboli...	52	4	4.11	1
GO:0031326	regulation of cellular biosynthetic proc...	467	19	36.91	1
GO:1901880	negative regulation of protein depolymer...	8	1	0.63	1
GO:0046040	IMP metabolic process	7	0	0.55	1
GO:0071704	organic substance metabolic process	3360	275	265.55	1
GO:0097237	cellular response to toxic substance	32	5	2.53	1
GO:0002097	tRNA wobble base modification	11	1	0.87	1
GO:0120039	plasma membrane bounded cell projection ...	20	3	1.58	1
GO:0046049	UMP metabolic process	5	1	0.4	1
GO:0046036	CTP metabolic process	6	0	0.47	1
GO:2000816	negative regulation of mitotic sister ch...	7	0	0.55	1
GO:0000904	cell morphogenesis involved in different...	20	3	1.58	1
GO:0031347	regulation of defense response	10	0	0.79	1
GO:0031349	positive regulation of defense response	10	0	0.79	1
GO:0007167	enzyme linked receptor protein signaling...	26	0	2.05	1
GO:0042327	positive regulation of phosphorylation	12	1	0.95	1
GO:1903509	liposaccharide metabolic process	23	0	1.82	1
GO:0005976	polysaccharide metabolic process	7	2	0.55	1
GO:0043242	negative regulation of protein complex d...	8	1	0.63	1
GO:0031333	negative regulation of protein complex a...	10	1	0.79	1
GO:0031334	positive regulation of protein complex a...	15	2	1.19	1
GO:0009636	response to toxic substance	32	5	2.53	1
GO:0050776	regulation of immune response	10	0	0.79	1
GO:0050778	positive regulation of immune response	10	0	0.79	1
GO:0042886	amide transport	225	10	17.78	1
GO:0071359	cellular response to dsRNA	5	0	0.4	1
GO:0032200	telomere organization	9	1	0.71	1
GO:1901988	negative regulation of cell cycle phase ...	9	0	0.71	1
GO:0042330	taxis	20	3	1.58	1
GO:0046132	pyrimidine ribonucleoside biosynthetic p...	9	1	0.71	1
GO:0070647	protein modification by small protein co...	139	8	10.99	1
GO:0034329	cell junction assembly	6	0	0.47	1
GO:0051050	positive regulation of transport	11	0	0.87	1
GO:0046134	pyrimidine nucleoside biosynthetic proce...	9	1	0.71	1
GO:2001257	regulation of cation channel activity	11	0	0.87	1
GO:0014070	response to organic cyclic compound	9	0	0.71	1
GO:2001259	positive regulation of cation channel ac...	11	0	0.87	1
GO:0000413	protein peptidyl-prolyl isomerization	28	0	2.21	1
GO:0030258	lipid modification	31	0	2.45	1
GO:0051503	adenine nucleotide transport	17	0	1.34	1
GO:0044085	cellular component biogenesis	285	25	22.52	1

## Sheet: GO Enrichment MF
GO.ID	Term	Annotated	Significant	Expected	weight01KS
GO:0003735	structural constituent of ribosome	140	43	11.12	< 1e-30
GO:0042302	structural constituent of cuticle	168	61	13.34	8.1e-21
GO:0009055	electron transfer activity	44	14	3.49	2e-08
GO:0008137	NADH dehydrogenase (ubiquinone) activity	13	7	1.03	2.8e-08
GO:0004298	threonine-type endopeptidase activity	15	7	1.19	5.2e-07
GO:0004601	peroxidase activity	22	4	1.75	9e-05
GO:0046933	proton-transporting ATP synthase activit...	11	2	0.87	0.00012
GO:0009881	photoreceptor activity	11	5	0.87	0.00015
GO:0015035	protein disulfide oxidoreductase activit...	10	5	0.79	0.00018
GO:0102965	alcohol-forming fatty acyl-CoA reductase...	22	7	1.75	0.00025
GO:0080019	fatty-acyl-CoA reductase (alcohol-formin...	24	7	1.91	0.00093
GO:0015078	hydrogen ion transmembrane transporter a...	48	11	3.81	0.001
GO:0004129	cytochrome-c oxidase activity	9	2	0.71	0.00121
GO:0036402	proteasome-activating ATPase activity	6	3	0.48	0.00143
GO:0051537	2 iron, 2 sulfur cluster binding	20	6	1.59	0.00285
GO:0004930	G-protein coupled receptor activity	106	12	8.42	0.00513
GO:0016615	malate dehydrogenase activity	5	1	0.4	0.00811
GO:0020037	heme binding	158	18	12.54	0.00971
GO:0003743	translation initiation factor activity	47	5	3.73	0.00995
GO:0051539	4 iron, 4 sulfur cluster binding	27	4	2.14	0.01152
GO:0005230	extracellular ligand-gated ion channel a...	40	5	3.18	0.01294
GO:0008138	protein tyrosine/serine/threonine phosph...	13	3	1.03	0.01423
GO:0016868	intramolecular transferase activity, pho...	6	2	0.48	0.01828
GO:0016651	oxidoreductase activity, acting on NAD(P...	27	11	2.14	0.02631
GO:0030234	enzyme regulator activity	147	14	11.67	0.02801
GO:0004176	ATP-dependent peptidase activity	5	3	0.4	0.03155
GO:0008026	ATP-dependent helicase activity	18	3	1.43	0.03164
GO:0003993	acid phosphatase activity	7	2	0.56	0.03234
GO:0070122	isopeptidase activity	9	3	0.71	0.03267
GO:0004698	calcium-dependent protein kinase C activ...	5	0	0.4	0.03533
GO:0046961	proton-transporting ATPase activity, rot...	8	1	0.64	0.03819
GO:0070573	metallodipeptidase activity	8	2	0.64	0.03875
GO:0019904	protein domain specific binding	15	2	1.19	0.03875
GO:0004890	GABA-A receptor activity	5	1	0.4	0.04401
GO:0004144	diacylglycerol O-acyltransferase activit...	6	2	0.48	0.04434
GO:0051920	peroxiredoxin activity	6	2	0.48	0.04599
GO:0016628	oxidoreductase activity, acting on the C...	14	0	1.11	0.04697
GO:0005089	Rho guanyl-nucleotide exchange factor ac...	10	1	0.79	0.04887
GO:0004497	monooxygenase activity	148	18	11.75	0.049
GO:0042578	phosphoric ester hydrolase activity	139	9	11.04	0.04913
GO:0016829	lyase activity	113	14	8.97	0.05272
GO:0030674	protein binding, bridging	8	1	0.64	0.0532
GO:0004714	transmembrane receptor protein tyrosine ...	8	0	0.64	0.05475
GO:0004725	protein tyrosine phosphatase activity	36	6	2.86	0.05777
GO:0019843	rRNA binding	13	2	1.03	0.06028
GO:0031409	pigment binding	9	0	0.71	0.06241
GO:0016645	oxidoreductase activity, acting on the C...	13	3	1.03	0.0627
GO:0018024	histone-lysine N-methyltransferase activ...	12	1	0.95	0.06488
GO:0005201	extracellular matrix structural constitu...	5	2	0.4	0.06644
GO:0008289	lipid binding	70	2	5.56	0.06675
GO:0016702	oxidoreductase activity, acting on singl...	8	1	0.64	0.06822
GO:0016888	endodeoxyribonuclease activity, producin...	8	0	0.64	0.07138
GO:0008308	voltage-gated anion channel activity	5	0	0.4	0.07254
GO:0003725	double-stranded RNA binding	5	0	0.4	0.07465
GO:0005319	lipid transporter activity	22	0	1.75	0.07709
GO:0008565	protein transporter activity	15	3	1.19	0.07788
GO:0005338	nucleotide-sugar transmembrane transport...	5	0	0.4	0.08497
GO:0005506	iron ion binding	167	22	13.26	0.08886
GO:0008170	N-methyltransferase activity	38	3	3.02	0.0949
GO:0016717	oxidoreductase activity, acting on paire...	7	1	0.56	0.09863
GO:0031177	phosphopantetheine binding	6	0	0.48	0.10254
GO:0004315	3-oxoacyl-[acyl-carrier-protein] synthas...	6	0	0.48	0.10254
GO:0016861	intramolecular oxidoreductase activity, ...	7	3	0.56	0.10514
GO:0016709	oxidoreductase activity, acting on paire...	8	2	0.64	0.10631
GO:0008135	translation factor activity, RNA binding	68	8	5.4	0.1066
GO:0000287	magnesium ion binding	40	3	3.18	0.10695
GO:0016836	hydro-lyase activity	33	3	2.62	0.11088
GO:0005198	structural molecule activity	361	110	28.66	0.11342
GO:1901681	sulfur compound binding	16	1	1.27	0.11689
GO:0008374	O-acyltransferase activity	17	4	1.35	0.11735
GO:0031369	translation initiation factor binding	5	0	0.4	0.11756
GO:0008408	3'-5' exonuclease activity	19	0	1.51	0.12066
GO:0019208	phosphatase regulator activity	11	0	0.87	0.122
GO:0004525	ribonuclease III activity	5	2	0.4	0.12661
GO:0005044	scavenger receptor activity	7	0	0.56	0.12749
GO:0003714	transcription corepressor activity	10	1	0.79	0.12828
GO:0004715	non-membrane spanning protein tyrosine k...	9	2	0.71	0.13564
GO:0008536	Ran GTPase binding	15	0	1.19	0.13807
GO:0016818	hydrolase activity, acting on acid anhyd...	447	38	35.49	0.14046
GO:0051536	iron-sulfur cluster binding	54	12	4.29	0.14076
GO:0008233	peptidase activity	566	47	44.94	0.1438
GO:0003954	NADH dehydrogenase activity	14	8	1.11	0.14626
GO:0070008	serine-type exopeptidase activity	8	1	0.64	0.14849
GO:0004448	isocitrate dehydrogenase activity	6	0	0.48	0.14927
GO:0050660	flavin adenine dinucleotide binding	76	11	6.03	0.14936
GO:0016295	myristoyl-[acyl-carrier-protein] hydrola...	5	0	0.4	0.14992
GO:0016296	palmitoyl-[acyl-carrier-protein] hydrola...	5	0	0.4	0.14992
GO:0004320	oleoyl-[acyl-carrier-protein] hydrolase ...	5	0	0.4	0.14992
GO:0016418	S-acetyltransferase activity	5	0	0.4	0.14992
GO:0016787	hydrolase activity	1567	113	124.41	0.15098
GO:0015267	channel activity	142	10	11.27	0.15307
GO:0016705	oxidoreductase activity, acting on paire...	163	19	12.94	0.15316
GO:0005216	ion channel activity	134	8	10.64	0.15386
GO:0016896	exoribonuclease activity, producing 5'-p...	9	1	0.71	0.15581
GO:0004559	alpha-mannosidase activity	9	0	0.71	0.15724
GO:0042277	peptide binding	9	1	0.71	0.15937
GO:0004181	metallocarboxypeptidase activity	25	3	1.98	0.15967
GO:0016209	antioxidant activity	31	5	2.46	0.16398
GO:0003824	catalytic activity	3494	287	277.41	0.16528
GO:0000062	fatty-acyl-CoA binding	5	1	0.4	0.16562
GO:0030170	pyridoxal phosphate binding	39	5	3.1	0.17593
GO:0015036	disulfide oxidoreductase activity	11	6	0.87	0.17727
GO:0005543	phospholipid binding	43	0	3.41	0.17812
GO:0008061	chitin binding	90	13	7.15	0.18077
GO:0003729	mRNA binding	24	0	1.91	0.18223
GO:0102148	N-acetyl-beta-D-galactosaminidase activi...	5	0	0.4	0.185
GO:0004563	beta-N-acetylhexosaminidase activity	5	0	0.4	0.185
GO:0101005	ubiquitinyl hydrolase activity	36	2	2.86	0.18592
GO:0005548	phospholipid transporter activity	10	0	0.79	0.18686
GO:0035591	signaling adaptor activity	6	0	0.48	0.18773
GO:0004659	prenyltransferase activity	10	0	0.79	0.19321
GO:0016859	cis-trans isomerase activity	29	0	2.3	0.19334
GO:0008569	ATP-dependent microtubule motor activity...	12	1	0.95	0.19556
GO:0008047	enzyme activator activity	59	7	4.68	0.19637
GO:0052745	inositol phosphate phosphatase activity	6	0	0.48	0.19736
GO:0015297	antiporter activity	15	0	1.19	0.19993
GO:0008081	phosphoric diester hydrolase activity	27	1	2.14	0.20173
GO:0005102	receptor binding	64	0	5.08	0.20176
GO:0019842	vitamin binding	58	5	4.6	0.20244
GO:0005544	calcium-dependent phospholipid binding	10	0	0.79	0.2051
GO:0019900	kinase binding	8	1	0.64	0.20672
GO:0004674	protein serine/threonine kinase activity	115	5	9.13	0.21103
GO:0045296	cadherin binding	6	1	0.48	0.21234
GO:0016842	amidine-lyase activity	5	0	0.4	0.21987
GO:0043021	ribonucleoprotein complex binding	17	0	1.35	0.22038
GO:0005525	GTP binding	163	12	12.94	0.22051
GO:0004035	alkaline phosphatase activity	7	1	0.56	0.22195
GO:0016641	oxidoreductase activity, acting on the C...	5	0	0.4	0.22327
GO:0042623	ATPase activity, coupled	121	14	9.61	0.22332
GO:0004784	superoxide dismutase activity	7	0	0.56	0.22506
GO:0016742	hydroxymethyl-, formyl- and related tran...	6	0	0.48	0.22902
GO:0022848	acetylcholine-gated cation-selective cha...	9	0	0.71	0.23589
GO:0015464	acetylcholine receptor activity	10	0	0.79	0.23738
GO:0016810	hydrolase activity, acting on carbon-nit...	52	1	4.13	0.24347
GO:0048037	cofactor binding	182	22	14.45	0.24394
GO:0008242	omega peptidase activity	8	1	0.64	0.24468
GO:0050662	coenzyme binding	133	17	10.56	0.24706
GO:1901505	carbohydrate derivative transmembrane tr...	28	0	2.22	0.24707
GO:0016411	acylglycerol O-acyltransferase activity	10	2	0.79	0.24793
GO:0008146	sulfotransferase activity	20	1	1.59	0.24929
GO:0016805	dipeptidase activity	9	2	0.71	0.25237
GO:0038023	signaling receptor activity	208	17	16.51	0.2553
GO:0016849	phosphorus-oxygen lyase activity	23	1	1.83	0.25624
GO:0005086	ARF guanyl-nucleotide exchange factor ac...	6	1	0.48	0.25888
GO:0003690	double-stranded DNA binding	24	1	1.91	0.2627
GO:0019206	nucleoside kinase activity	5	0	0.4	0.26354
GO:0005507	copper ion binding	19	1	1.51	0.27026
GO:0046914	transition metal ion binding	889	55	70.58	0.27214
GO:0016740	transferase activity	1030	55	81.78	0.27504
GO:0008174	mRNA methyltransferase activity	6	0	0.48	0.2759
GO:0003774	motor activity	64	8	5.08	0.28055
GO:0008641	ubiquitin-like modifier activating enzym...	9	0	0.71	0.2835
GO:0003746	translation elongation factor activity	19	2	1.51	0.28478
GO:0003887	DNA-directed DNA polymerase activity	8	1	0.64	0.2913
GO:0001882	nucleoside binding	167	12	13.26	0.29342
GO:0016627	oxidoreductase activity, acting on the C...	43	5	3.41	0.29356
GO:0042802	identical protein binding	9	0	0.71	0.29585
GO:0015020	glucuronosyltransferase activity	23	1	1.83	0.29597
GO:0019201	nucleotide kinase activity	6	0	0.48	0.29728
GO:0003951	NAD+ kinase activity	10	0	0.79	0.30078
GO:1901981	phosphatidylinositol phosphate binding	7	0	0.56	0.30158
GO:0005549	odorant binding	63	4	5	0.30387
GO:0098772	molecular function regulator	239	17	18.98	0.30535
GO:0004222	metalloendopeptidase activity	60	5	4.76	0.31247
GO:0004722	protein serine/threonine phosphatase act...	16	0	1.27	0.31781
GO:0005516	calmodulin binding	12	1	0.95	0.321
GO:0016840	carbon-nitrogen lyase activity	9	1	0.71	0.32146
GO:0003796	lysozyme activity	5	1	0.4	0.32258
GO:0005515	protein binding	1899	112	150.77	0.32377
GO:0015293	symporter activity	28	1	2.22	0.3246
GO:0015932	nucleobase-containing compound transmemb...	27	0	2.14	0.32682
GO:0004364	glutathione transferase activity	5	0	0.4	0.3294
GO:0016616	oxidoreductase activity, acting on the C...	44	2	3.49	0.33232
GO:0016881	acid-amino acid ligase activity	6	0	0.48	0.33914
GO:0003995	acyl-CoA dehydrogenase activity	10	2	0.79	0.34245
GO:0046872	metal ion binding	1729	108	137.27	0.35129
GO:0016301	kinase activity	342	18	27.15	0.36026
GO:0031683	G-protein beta/gamma-subunit complex bin...	6	0	0.48	0.36183
GO:0008083	growth factor activity	13	0	1.03	0.36988
GO:0016853	isomerase activity	77	9	6.11	0.36999
GO:0043130	ubiquitin binding	6	0	0.48	0.37138
GO:0005085	guanyl-nucleotide exchange factor activi...	53	3	4.21	0.37855
GO:0043168	anion binding	1118	80	88.76	0.37922
GO:0016772	transferase activity, transferring phosp...	423	21	33.58	0.38013
GO:0032561	guanyl ribonucleotide binding	166	12	13.18	0.38761
GO:0019706	protein-cysteine S-palmitoyltransferase ...	10	0	0.79	0.38887
GO:0004983	neuropeptide Y receptor activity	7	0	0.56	0.3898
GO:0016835	carbon-oxygen lyase activity	38	3	3.02	0.3904
GO:0008195	phosphatidate phosphatase activity	5	0	0.4	0.39302
GO:0003924	GTPase activity	115	6	9.13	0.39312
GO:0016877	ligase activity, forming carbon-sulfur b...	13	0	1.03	0.39313
GO:0000976	transcription regulatory region sequence...	10	1	0.79	0.39461
GO:0042803	protein homodimerization activity	6	0	0.48	0.39743
GO:0016624	oxidoreductase activity, acting on the a...	6	0	0.48	0.39909
GO:0022857	transmembrane transporter activity	518	32	41.13	0.40448
GO:0008484	sulfuric ester hydrolase activity	9	2	0.71	0.40769
GO:0004003	ATP-dependent DNA helicase activity	13	2	1.03	0.4077
GO:0005487	nucleocytoplasmic transporter activity	5	0	0.4	0.41019
GO:0008324	cation transmembrane transporter activit...	177	17	14.05	0.41065
GO:0047522	15-oxoprostaglandin 13-oxidase activity	5	0	0.4	0.41751
GO:0036132	13-prostaglandin reductase activity	5	0	0.4	0.41751
GO:0032440	2-alkenal reductase [NAD(P)] activity	5	0	0.4	0.41751
GO:0008409	5'-3' exonuclease activity	6	1	0.48	0.41953
GO:0015631	tubulin binding	59	5	4.68	0.42125
GO:0016410	N-acyltransferase activity	36	2	2.86	0.42164
GO:0005488	binding	5476	348	434.77	0.42233
GO:0061134	peptidase regulator activity	49	4	3.89	0.42292
GO:0016857	racemase and epimerase activity, acting ...	6	2	0.48	0.42361
GO:0016884	carbon-nitrogen ligase activity, with gl...	8	0	0.64	0.42378
GO:0015085	calcium ion transmembrane transporter ac...	25	2	1.98	0.42893
GO:0036094	small molecule binding	1145	83	90.91	0.43354
GO:0016741	transferase activity, transferring one-c...	115	5	9.13	0.43485
GO:0051015	actin filament binding	22	4	1.75	0.43958
GO:0016417	S-acyltransferase activity	17	0	1.35	0.44444
GO:0004312	fatty acid synthase activity	8	0	0.64	0.44445
GO:0005262	calcium channel activity	20	2	1.59	0.44971
GO:0004675	transmembrane receptor protein serine/th...	7	0	0.56	0.45711
GO:0030246	carbohydrate binding	70	8	5.56	0.46077
GO:0016860	intramolecular oxidoreductase activity	14	5	1.11	0.46267
GO:0016831	carboxy-lyase activity	26	5	2.06	0.46345
GO:0005200	structural constituent of cytoskeleton	14	2	1.11	0.46718
GO:0004519	endonuclease activity	44	3	3.49	0.46875
GO:0060590	ATPase regulator activity	9	2	0.71	0.47446
GO:0017069	snRNA binding	5	0	0.4	0.47744
GO:0016614	oxidoreductase activity, acting on CH-OH...	69	5	5.48	0.48233
GO:0008514	organic anion transmembrane transporter ...	19	0	1.51	0.48378
GO:0034061	DNA polymerase activity	9	1	0.71	0.48422
GO:0030983	mismatched DNA binding	5	0	0.4	0.4895
GO:0016409	palmitoyltransferase activity	12	0	0.95	0.49704
GO:0015081	sodium ion transmembrane transporter act...	39	1	3.1	0.50036
GO:0015491	cation:cation antiporter activity	5	0	0.4	0.50067
GO:0016783	sulfurtransferase activity	6	0	0.48	0.50488
GO:0140097	catalytic activity, acting on DNA	72	5	5.72	0.50642
GO:0008092	cytoskeletal protein binding	159	15	12.62	0.50653
GO:0030276	clathrin binding	7	0	0.56	0.50876
GO:0043015	gamma-tubulin binding	5	0	0.4	0.50899
GO:0016671	oxidoreductase activity, acting on a sul...	5	1	0.4	0.51217
GO:0071949	FAD binding	23	3	1.83	0.51291
GO:0002161	aminoacyl-tRNA editing activity	7	0	0.56	0.51369
GO:0008017	microtubule binding	47	5	3.73	0.51784
GO:0017111	nucleoside-triphosphatase activity	429	37	34.06	0.51817
GO:0008080	N-acetyltransferase activity	34	1	2.7	0.52103
GO:0003779	actin binding	97	11	7.7	0.52147
GO:0003697	single-stranded DNA binding	13	1	1.03	0.52355
GO:0061733	peptide-lysine-N-acetyltransferase activ...	11	0	0.87	0.52661
GO:0016701	oxidoreductase activity, acting on singl...	9	1	0.71	0.52827
GO:0004970	ionotropic glutamate receptor activity	15	2	1.19	0.53661
GO:0008312	7S RNA binding	6	0	0.48	0.53768
GO:0016279	protein-lysine N-methyltransferase activ...	16	2	1.27	0.54099
GO:0016746	transferase activity, transferring acyl ...	159	11	12.62	0.54697
GO:0015291	secondary active transmembrane transport...	57	1	4.53	0.55223
GO:0044877	macromolecular complex binding	61	5	4.84	0.55381
GO:0008168	methyltransferase activity	108	5	8.57	0.55526
GO:0004114	3',5'-cyclic-nucleotide phosphodiesteras...	11	0	0.87	0.55854
GO:0016755	transferase activity, transferring amino...	10	0	0.79	0.56293
GO:0019829	cation-transporting ATPase activity	19	2	1.51	0.56382
GO:0008276	protein methyltransferase activity	34	2	2.7	0.56504
GO:0015662	ATPase activity, coupled to transmembran...	5	0	0.4	0.56509
GO:0003712	transcription cofactor activity	47	3	3.73	0.5756
GO:0016776	phosphotransferase activity, phosphate g...	12	0	0.95	0.5774
GO:0016790	thiolester hydrolase activity	13	1	1.03	0.57843
GO:0004713	protein tyrosine kinase activity	31	3	2.46	0.58016
GO:0000030	mannosyltransferase activity	16	1	1.27	0.5829
GO:0004707	MAP kinase activity	5	0	0.4	0.58532
GO:0031625	ubiquitin protein ligase binding	7	0	0.56	0.58542
GO:0008235	metalloexopeptidase activity	47	6	3.73	0.58743
GO:0030215	semaphorin receptor binding	5	0	0.4	0.58939
GO:0045182	translation regulator activity	5	0	0.4	0.59522
GO:0005245	voltage-gated calcium channel activity	6	1	0.48	0.59946
GO:0003682	chromatin binding	11	1	0.87	0.60008
GO:0019899	enzyme binding	107	5	8.5	0.60177
GO:0060089	molecular transducer activity	229	17	18.18	0.60549
GO:0016788	hydrolase activity, acting on ester bond...	344	20	27.31	0.60924
GO:0008199	ferric iron binding	8	2	0.64	0.60939
GO:0004322	ferroxidase activity	8	2	0.64	0.60939
GO:0046982	protein heterodimerization activity	31	1	2.46	0.60979
GO:0008237	metallopeptidase activity	152	17	12.07	0.61583
GO:0005261	cation channel activity	76	2	6.03	0.61643
GO:0008528	G-protein coupled peptide receptor activ...	22	0	1.75	0.61858
GO:0004702	signal transducer, downstream of recepto...	8	1	0.64	0.61878
GO:0015299	solute:proton antiporter activity	5	0	0.4	0.61937
GO:0003777	microtubule motor activity	39	4	3.1	0.62062
GO:0019001	guanyl nucleotide binding	167	12	13.26	0.6226
GO:0008649	rRNA methyltransferase activity	8	1	0.64	0.62461
GO:0102756	very-long-chain 3-ketoacyl-CoA synthase ...	19	2	1.51	0.63075
GO:0102336	3-oxo-arachidoyl-CoA synthase activity	19	2	1.51	0.63075
GO:0102337	3-oxo-cerotoyl-CoA synthase activity	19	2	1.51	0.63075
GO:0102338	3-oxo-lignoceronyl-CoA synthase activity	19	2	1.51	0.63075
GO:0004386	helicase activity	106	8	8.42	0.63148
GO:0005244	voltage-gated ion channel activity	34	1	2.7	0.63495
GO:0004888	transmembrane signaling receptor activit...	189	17	15.01	0.63546
GO:0051287	NAD binding	38	3	3.02	0.63703
GO:0099516	ion antiporter activity	7	0	0.56	0.63786
GO:0005254	chloride channel activity	7	0	0.56	0.64203
GO:0046983	protein dimerization activity	105	2	8.34	0.64291
GO:0016667	oxidoreductase activity, acting on a sul...	22	7	1.75	0.643
GO:0004177	aminopeptidase activity	39	2	3.1	0.64449
GO:0005096	GTPase activator activity	44	5	3.49	0.64635
GO:0043022	ribosome binding	9	0	0.71	0.64665
GO:0016891	endoribonuclease activity, producing 5'-...	13	3	1.03	0.64952
GO:0016917	GABA receptor activity	9	1	0.71	0.65613
GO:0140096	catalytic activity, acting on a protein	1052	72	83.52	0.65724
GO:0004806	triglyceride lipase activity	28	2	2.22	0.65808
GO:0030545	receptor regulator activity	42	0	3.33	0.65934
GO:0000977	RNA polymerase II regulatory region sequ...	6	1	0.48	0.6599
GO:0016747	transferase activity, transferring acyl ...	131	11	10.4	0.6693
GO:0051183	vitamin transporter activity	7	0	0.56	0.67165
GO:0016798	hydrolase activity, acting on glycosyl b...	104	4	8.26	0.67208
GO:0016538	cyclin-dependent protein serine/threonin...	13	0	1.03	0.67227
GO:0016298	lipase activity	55	3	4.37	0.67237
GO:0008375	acetylglucosaminyltransferase activity	11	0	0.87	0.6728
GO:0005328	neurotransmitter:sodium symporter activi...	18	1	1.43	0.67379
GO:0046906	tetrapyrrole binding	159	18	12.62	0.67444
GO:0005509	calcium ion binding	167	7	13.26	0.68239
GO:0000179	rRNA (adenine-N6,N6-)-dimethyltransferas...	5	1	0.4	0.68706
GO:0046873	metal ion transmembrane transporter acti...	107	5	8.5	0.68734
GO:0016830	carbon-carbon lyase activity	29	5	2.3	0.68762
GO:0000339	RNA cap binding	5	0	0.4	0.69125
GO:0019901	protein kinase binding	7	1	0.56	0.69167
GO:0004402	histone acetyltransferase activity	10	0	0.79	0.69307
GO:0030551	cyclic nucleotide binding	5	0	0.4	0.69835
GO:0005179	hormone activity	24	0	1.91	0.70408
GO:0022891	substrate-specific transmembrane transpo...	282	23	22.39	0.70578
GO:0016779	nucleotidyltransferase activity	65	2	5.16	0.70669
GO:0010181	FMN binding	8	0	0.64	0.71024
GO:0004089	carbonate dehydratase activity	13	0	1.03	0.71247
GO:0016757	transferase activity, transferring glyco...	142	8	11.27	0.71354
GO:0072509	divalent inorganic cation transmembrane ...	27	2	2.14	0.71577
GO:0004198	calcium-dependent cysteine-type endopept...	9	0	0.71	0.7176
GO:0004826	phenylalanine-tRNA ligase activity	7	0	0.56	0.71902
GO:0043169	cation binding	1735	108	137.75	0.71988
GO:0004879	nuclear receptor activity	7	0	0.56	0.72189
GO:0019203	carbohydrate phosphatase activity	5	0	0.4	0.72325
GO:0009975	cyclase activity	22	0	1.75	0.72345
GO:0016646	oxidoreductase activity, acting on the C...	11	2	0.87	0.72506
GO:0008173	RNA methyltransferase activity	32	2	2.54	0.72676
GO:0019789	SUMO transferase activity	5	0	0.4	0.72741
GO:0032403	protein complex binding	41	5	3.26	0.72769
GO:0000988	transcription factor activity, protein b...	49	3	3.89	0.72948
GO:0003678	DNA helicase activity	32	3	2.54	0.72958
GO:0051082	unfolded protein binding	28	0	2.22	0.7304
GO:0004553	hydrolase activity, hydrolyzing O-glycos...	78	4	6.19	0.73151
GO:0033218	amide binding	16	1	1.27	0.73225
GO:0030145	manganese ion binding	11	0	0.87	0.73285
GO:0060090	molecular adaptor activity	16	1	1.27	0.73566
GO:0008745	N-acetylmuramoyl-L-alanine amidase activ...	6	0	0.48	0.73628
GO:0008417	fucosyltransferase activity	6	0	0.48	0.73734
GO:0004672	protein kinase activity	233	13	18.5	0.73759
GO:0030554	adenyl nucleotide binding	773	52	61.37	0.73855
GO:0051087	chaperone binding	8	1	0.64	0.73863
GO:0015103	inorganic anion transmembrane transporte...	22	0	1.75	0.74338
GO:0005249	voltage-gated potassium channel activity	17	0	1.35	0.74874
GO:0019213	deacetylase activity	7	0	0.56	0.75127
GO:0005215	transporter activity	565	35	44.86	0.75213
GO:0004500	dopamine beta-monooxygenase activity	5	0	0.4	0.75214
GO:0008094	DNA-dependent ATPase activity	21	2	1.67	0.75269
GO:0001671	ATPase activator activity	5	1	0.4	0.75461
GO:0022804	active transmembrane transporter activit...	126	5	10	0.75616
GO:0004857	enzyme inhibitor activity	58	4	4.6	0.75677
GO:0016620	oxidoreductase activity, acting on the a...	38	9	3.02	0.75737
GO:0004180	carboxypeptidase activity	39	4	3.1	0.75744
GO:0016799	hydrolase activity, hydrolyzing N-glycos...	6	0	0.48	0.75864
GO:0030414	peptidase inhibitor activity	47	3	3.73	0.75949
GO:0004623	phospholipase A2 activity	8	0	0.64	0.76117
GO:0070403	NAD+ binding	6	0	0.48	0.76209
GO:0008271	secondary active sulfate transmembrane t...	10	0	0.79	0.76369
GO:0019783	ubiquitin-like protein-specific protease...	36	2	2.86	0.76684
GO:0030695	GTPase regulator activity	46	5	3.65	0.7686
GO:0051213	dioxygenase activity	20	1	1.59	0.77286
GO:0140103	catalytic activity, acting on a glycopro...	5	0	0.4	0.77348
GO:0004197	cysteine-type endopeptidase activity	23	1	1.83	0.77485
GO:0017056	structural constituent of nuclear pore	12	0	0.95	0.77578
GO:0000981	RNA polymerase II transcription factor a...	72	2	5.72	0.77602
GO:0030151	molybdenum ion binding	5	0	0.4	0.77633
GO:0004556	alpha-amylase activity	5	0	0.4	0.77763
GO:0103025	alpha-amylase activity (releasing maltoh...	5	0	0.4	0.77763
GO:0003916	DNA topoisomerase activity	5	0	0.4	0.77979
GO:0070566	adenylyltransferase activity	8	0	0.64	0.78588
GO:0005267	potassium channel activity	29	0	2.3	0.78852
GO:0008241	peptidyl-dipeptidase activity	7	1	0.56	0.79064
GO:0004143	diacylglycerol kinase activity	5	0	0.4	0.79072
GO:0031406	carboxylic acid binding	8	0	0.64	0.79094
GO:0004526	ribonuclease P activity	6	1	0.48	0.79383
GO:0004536	deoxyribonuclease activity	15	0	1.19	0.80076
GO:0004383	guanylate cyclase activity	13	0	1.03	0.80688
GO:0016653	oxidoreductase activity, acting on NAD(P...	5	0	0.4	0.80754
GO:0005048	signal sequence binding	5	0	0.4	0.80842
GO:0032574	5'-3' RNA helicase activity	7	1	0.56	0.80874
GO:0008757	S-adenosylmethionine-dependent methyltra...	59	3	4.68	0.80927
GO:0005272	sodium channel activity	16	0	1.27	0.80987
GO:1901363	heterocyclic compound binding	2828	165	224.53	0.81265
GO:0000166	nucleotide binding	1081	78	85.83	0.81359
GO:0016638	oxidoreductase activity, acting on the C...	8	0	0.64	0.81423
GO:0102567	phospholipase A2 activity (consuming 1,2...	6	0	0.48	0.81496
GO:0102568	phospholipase A2 activity consuming 1,2-...	6	0	0.48	0.81496
GO:0015276	ligand-gated ion channel activity	49	5	3.89	0.81501
GO:0019239	deaminase activity	11	1	0.87	0.81546
GO:0016491	oxidoreductase activity	601	84	47.72	0.82038
GO:0016894	endonuclease activity, active with eithe...	6	0	0.48	0.82759
GO:0015079	potassium ion transmembrane transporter ...	32	0	2.54	0.82957
GO:0004527	exonuclease activity	28	1	2.22	0.83288
GO:0015075	ion transmembrane transporter activity	268	23	21.28	0.83288
GO:0008194	UDP-glycosyltransferase activity	54	2	4.29	0.83867
GO:0005484	SNAP receptor activity	8	1	0.64	0.83877
GO:0031418	L-ascorbic acid binding	5	0	0.4	0.8391
GO:0016780	phosphotransferase activity, for other s...	11	1	0.87	0.83976
GO:0004520	endodeoxyribonuclease activity	11	0	0.87	0.84742
GO:0004812	aminoacyl-tRNA ligase activity	44	1	3.49	0.84898
GO:0070006	metalloaminopeptidase activity	13	1	1.03	0.8508
GO:0005184	neuropeptide hormone activity	11	0	0.87	0.85093
GO:0003684	damaged DNA binding	14	0	1.11	0.85127
GO:0003700	DNA binding transcription factor activit...	227	8	18.02	0.85179
GO:0016462	pyrophosphatase activity	443	38	35.17	0.85197
GO:0016887	ATPase activity	175	19	13.89	0.85314
GO:0072341	modified amino acid binding	8	0	0.64	0.85507
GO:0004190	aspartic-type endopeptidase activity	10	1	0.79	0.85674
GO:0034593	phosphatidylinositol bisphosphate phosph...	7	0	0.56	0.85863
GO:0003723	RNA binding	429	23	34.06	0.85887
GO:0008483	transaminase activity	14	0	1.11	0.8656
GO:0140102	catalytic activity, acting on a rRNA	9	1	0.71	0.8683
GO:0017137	Rab GTPase binding	9	1	0.71	0.86946
GO:0016801	hydrolase activity, acting on ether bond...	5	0	0.4	0.87473
GO:0044212	transcription regulatory region DNA bind...	11	1	0.87	0.87814
GO:0046527	glucosyltransferase activity	8	0	0.64	0.87829
GO:0140101	catalytic activity, acting on a tRNA	82	4	6.51	0.8793
GO:1990837	sequence-specific double-stranded DNA bi...	11	1	0.87	0.88015
GO:0016782	transferase activity, transferring sulfu...	32	2	2.54	0.88132
GO:0017048	Rho GTPase binding	20	1	1.59	0.88198
GO:0019200	carbohydrate kinase activity	10	0	0.79	0.8849
GO:0019205	nucleobase-containing compound kinase ac...	17	0	1.35	0.88809
GO:0043492	ATPase activity, coupled to movement of ...	68	4	5.4	0.88949
GO:0009982	pseudouridine synthase activity	9	0	0.71	0.88973
GO:0004518	nuclease activity	73	4	5.8	0.89128
GO:0042054	histone methyltransferase activity	13	1	1.03	0.89167
GO:0022853	active ion transmembrane transporter act...	22	2	1.75	0.89507
GO:0015294	solute:cation symporter activity	21	1	1.67	0.89589
GO:0015108	chloride transmembrane transporter activ...	10	0	0.79	0.89592
GO:0016763	transferase activity, transferring pento...	15	1	1.19	0.8965
GO:0016715	oxidoreductase activity, acting on paire...	6	0	0.48	0.89714
GO:0016773	phosphotransferase activity, alcohol gro...	282	14	22.39	0.89953
GO:0005524	ATP binding	767	52	60.9	0.90089
GO:0004721	phosphoprotein phosphatase activity	63	7	5	0.90446
GO:0004540	ribonuclease activity	32	4	2.54	0.90637
GO:0019887	protein kinase regulator activity	19	0	1.51	0.90665
GO:0008318	protein prenyltransferase activity	6	0	0.48	0.90849
GO:0008134	transcription factor binding	13	1	1.03	0.90912
GO:0004984	olfactory receptor activity	7	0	0.56	0.90952
GO:0004842	ubiquitin-protein transferase activity	63	2	5	0.91556
GO:0016706	oxidoreductase activity, acting on paire...	8	0	0.64	0.9168
GO:0097159	organic cyclic compound binding	2830	165	224.69	0.92422
GO:0043565	sequence-specific DNA binding	154	3	12.23	0.92459
GO:0031072	heat shock protein binding	6	0	0.48	0.92754
GO:0004016	adenylate cyclase activity	6	0	0.48	0.92776
GO:0097367	carbohydrate derivative binding	1041	76	82.65	0.92935
GO:0004521	endoribonuclease activity	21	3	1.67	0.93298
GO:0016765	transferase activity, transferring alkyl...	25	0	1.98	0.93404
GO:0003707	steroid hormone receptor activity	13	0	1.03	0.93509
GO:0008171	O-methyltransferase activity	14	1	1.11	0.93603
GO:0016879	ligase activity, forming carbon-nitrogen...	24	0	1.91	0.9373
GO:0090482	vitamin transmembrane transporter activi...	5	0	0.4	0.93887
GO:0099094	ligand-gated cation channel activity	15	0	1.19	0.93969
GO:0004867	serine-type endopeptidase inhibitor acti...	30	2	2.38	0.94034
GO:0042626	ATPase activity, coupled to transmembran...	67	4	5.32	0.94055
GO:0048029	monosaccharide binding	10	0	0.79	0.94065
GO:0016274	protein-arginine N-methyltransferase act...	12	0	0.95	0.94278
GO:0000175	3'-5'-exoribonuclease activity	8	0	0.64	0.94389
GO:0004376	glycolipid mannosyltransferase activity	5	0	0.4	0.94453
GO:0016634	oxidoreductase activity, acting on the C...	6	0	0.48	0.94615
GO:0016814	hydrolase activity, acting on carbon-nit...	12	1	0.95	0.94893
GO:0016811	hydrolase activity, acting on carbon-nit...	30	0	2.38	0.95106
GO:0004620	phospholipase activity	27	1	2.14	0.95125
GO:0008188	neuropeptide receptor activity	13	0	1.03	0.95425
GO:0000049	tRNA binding	23	1	1.83	0.95511
GO:0004843	thiol-dependent ubiquitin-specific prote...	33	2	2.62	0.95587
GO:0052866	phosphatidylinositol phosphate phosphata...	10	0	0.79	0.95892
GO:0036459	thiol-dependent ubiquitinyl hydrolase ac...	35	2	2.78	0.96112
GO:0008234	cysteine-type peptidase activity	79	4	6.27	0.96175
GO:0004252	serine-type endopeptidase activity	272	14	21.6	0.96368
GO:0016796	exonuclease activity, active with either...	12	1	0.95	0.96693
GO:0003724	RNA helicase activity	55	5	4.37	0.97146
GO:0061630	ubiquitin protein ligase activity	25	1	1.98	0.97298
GO:0008175	tRNA methyltransferase activity	9	0	0.71	0.97627
GO:0003676	nucleic acid binding	1717	78	136.32	0.97673
GO:0050661	NADP binding	22	2	1.75	0.97714
GO:0000989	transcription factor activity, transcrip...	48	3	3.81	0.97945
GO:0035091	phosphatidylinositol binding	27	0	2.14	0.97976
GO:0034979	NAD-dependent protein deacetylase activi...	5	0	0.4	0.98102
GO:0016758	transferase activity, transferring hexos...	91	4	7.22	0.98119
GO:0050839	cell adhesion molecule binding	7	1	0.56	0.98249
GO:0003677	DNA binding	562	24	44.62	0.98319
GO:0008236	serine-type peptidase activity	295	15	23.42	0.98357
GO:0004549	tRNA-specific ribonuclease activity	9	1	0.71	0.98544
GO:0052689	carboxylic ester hydrolase activity	84	4	6.67	0.98573
GO:0015929	hexosaminidase activity	6	0	0.48	0.98796
GO:0032559	adenyl ribonucleotide binding	771	52	61.21	0.98857
GO:0140098	catalytic activity, acting on RNA	218	15	17.31	0.99046
GO:0017016	Ras GTPase binding	45	2	3.57	0.99197
GO:0032549	ribonucleoside binding	166	12	13.18	0.99225
GO:0004185	serine-type carboxypeptidase activity	7	0	0.56	0.99237
GO:0004571	mannosyl-oligosaccharide 1,2-alpha-manno...	5	0	0.4	0.99313
GO:0016407	acetyltransferase activity	42	1	3.33	0.99386
GO:0016791	phosphatase activity	110	8	8.73	0.99419
GO:0004535	poly(A)-specific ribonuclease activity	5	0	0.4	0.99425
GO:0003899	DNA-directed 5'-3' RNA polymerase activi...	31	1	2.46	0.99524
GO:0016433	rRNA (adenine) methyltransferase activit...	6	1	0.48	0.99539
GO:0005347	ATP transmembrane transporter activity	18	0	1.43	0.99544
GO:0015405	P-P-bond-hydrolysis-driven transmembrane...	68	4	5.4	0.99635
GO:0035251	UDP-glucosyltransferase activity	5	0	0.4	0.99667
GO:0048018	receptor ligand activity	41	0	3.26	0.99669
GO:0022836	gated channel activity	82	6	6.51	0.9968
GO:0004866	endopeptidase inhibitor activity	42	2	3.33	0.9972
GO:0016874	ligase activity	90	3	7.15	0.99729
GO:0019888	protein phosphatase regulator activity	9	0	0.71	0.99833
GO:0003713	transcription coactivator activity	12	0	0.95	0.99856
GO:0005088	Ras guanyl-nucleotide exchange factor ac...	12	1	0.95	0.99889
GO:0005539	glycosaminoglycan binding	7	0	0.56	0.99952
GO:0016854	racemase and epimerase activity	7	2	0.56	0.99994
GO:0008270	zinc ion binding	688	32	54.62	0.99998
GO:0043167	ion binding	2708	179	215	1
GO:0016721	oxidoreductase activity, acting on super...	7	0	0.56	1
GO:0016722	oxidoreductase activity, oxidizing metal...	8	2	0.64	1
GO:0098960	postsynaptic neurotransmitter receptor a...	9	0	0.71	1
GO:0015077	monovalent inorganic cation transmembran...	114	12	9.05	1
GO:0016724	oxidoreductase activity, oxidizing metal...	8	2	0.64	1
GO:0032182	ubiquitin-like protein binding	6	0	0.48	1
GO:0038024	cargo receptor activity	7	0	0.56	1
GO:0015197	peptide transporter activity	15	3	1.19	1
GO:0016160	amylase activity	5	0	0.4	1
GO:1901265	nucleoside phosphate binding	1081	78	85.83	1
GO:0019207	kinase regulator activity	19	0	1.51	1
GO:0017171	serine hydrolase activity	295	15	23.42	1
GO:0061135	endopeptidase regulator activity	42	2	3.33	1
GO:0043177	organic acid binding	8	0	0.64	1
GO:0140110	transcription regulator activity	274	11	21.75	1
GO:0070279	vitamin B6 binding	39	5	3.1	1
GO:0061659	ubiquitin-like protein ligase activity	25	1	1.98	1
GO:0022890	inorganic cation transmembrane transport...	161	16	12.78	1
GO:0008238	exopeptidase activity	93	9	7.38	1
GO:0005253	anion channel activity	9	0	0.71	1
GO:0022892	substrate-specific transporter activity	315	26	25.01	1
GO:0044389	ubiquitin-like protein ligase binding	7	0	0.56	1
GO:0015399	primary active transmembrane transporter...	68	4	5.4	1
GO:0004532	exoribonuclease activity	9	1	0.71	1
GO:0003755	peptidyl-prolyl cis-trans isomerase acti...	28	0	2.22	1
GO:0015002	heme-copper terminal oxidase activity	9	2	0.71	1
GO:0015116	sulfate transmembrane transporter activi...	10	0	0.79	1
GO:0016655	oxidoreductase activity, acting on NAD(P...	13	7	1.03	1
GO:0001067	regulatory region nucleic acid binding	11	1	0.87	1
GO:0019787	ubiquitin-like protein transferase activ...	68	2	5.4	1
GO:0019199	transmembrane receptor protein kinase ac...	15	0	1.19	1
GO:0016893	endonuclease activity, active with eithe...	21	3	1.67	1
GO:0005231	excitatory extracellular ligand-gated io...	9	0	0.71	1
GO:0016684	oxidoreductase activity, acting on perox...	22	4	1.75	1
GO:0030594	neurotransmitter receptor activity	25	2	1.98	1
GO:0060589	nucleoside-triphosphatase regulator acti...	55	7	4.37	1
GO:0016675	oxidoreductase activity, acting on a hem...	9	2	0.71	1
GO:0016676	oxidoreductase activity, acting on a hem...	9	2	0.71	1
GO:0022824	transmitter-gated ion channel activity	24	2	1.91	1
GO:0015370	solute:sodium symporter activity	18	1	1.43	1
GO:0008066	glutamate receptor activity	15	2	1.19	1
GO:0032296	double-stranded RNA-specific ribonucleas...	5	2	0.4	1
GO:0042625	ATPase coupled ion transmembrane transpo...	19	2	1.51	1
GO:0004175	endopeptidase activity	378	28	30.01	1
GO:0004697	protein kinase C activity	5	0	0.4	1
GO:1901567	fatty acid derivative binding	5	1	0.4	1
GO:0016866	intramolecular transferase activity	15	2	1.19	1
GO:0022843	voltage-gated cation channel activity	23	1	1.83	1
GO:0000295	adenine nucleotide transmembrane transpo...	18	0	1.43	1
GO:0004112	cyclic-nucleotide phosphodiesterase acti...	11	0	0.87	1
GO:0001012	RNA polymerase II regulatory region DNA ...	6	1	0.48	1
GO:0022832	voltage-gated channel activity	34	1	2.7	1
GO:0022834	ligand-gated channel activity	49	5	3.89	1
GO:0022835	transmitter-gated channel activity	24	2	1.91	1
GO:0099600	transmembrane receptor activity	197	17	15.64	1
GO:0022838	substrate-specific channel activity	134	8	10.64	1
GO:0016297	acyl-[acyl-carrier-protein] hydrolase ac...	5	0	0.4	1
GO:0034212	peptide N-acetyltransferase activity	11	0	0.87	1
GO:0016820	hydrolase activity, acting on acid anhyd...	67	4	5.32	1
GO:0015298	solute:cation antiporter activity	7	0	0.56	1
GO:0022803	passive transmembrane transporter activi...	142	10	11.27	1
GO:0031267	small GTPase binding	45	2	3.57	1
GO:0098531	transcription factor activity, direct li...	7	0	0.56	1
GO:0019707	protein-cysteine S-acyltransferase activ...	10	0	0.79	1
GO:0016817	hydrolase activity, acting on acid anhyd...	447	38	35.49	1
GO:0008509	anion transmembrane transporter activity	43	0	3.41	1
GO:0005057	signal transducer activity, downstream o...	8	1	0.64	1
GO:0070011	peptidase activity, acting on L-amino ac...	554	45	43.98	1
GO:0009931	calcium-dependent protein serine/threoni...	5	0	0.4	1
GO:0015605	organophosphate ester transmembrane tran...	18	0	1.43	1
GO:0003674	molecular_function	7998	635	635	1
GO:0016273	arginine N-methyltransferase activity	12	0	0.95	1
GO:0016278	lysine N-methyltransferase activity	16	2	1.27	1
GO:0000975	regulatory region DNA binding	11	1	0.87	1
GO:0070035	purine NTP-dependent helicase activity	18	3	1.43	1
GO:0050136	NADH dehydrogenase (quinone) activity	13	7	1.03	1
GO:0001653	peptide receptor activity	22	0	1.75	1
GO:0004871	signal transducer activity	216	18	17.15	1
GO:0004872	receptor activity	223	17	17.71	1
GO:0035639	purine ribonucleoside triphosphate bindi...	924	63	73.36	1
GO:0097747	RNA polymerase activity	31	1	2.46	1
GO:0070001	aspartic-type peptidase activity	10	1	0.79	1
GO:0070003	threonine-type peptidase activity	15	7	1.19	1
GO:0015215	nucleotide transmembrane transporter act...	18	0	1.43	1
GO:0015216	purine nucleotide transmembrane transpor...	18	0	1.43	1
GO:0015923	mannosidase activity	9	0	0.71	1
GO:0033558	protein deacetylase activity	5	0	0.4	1
GO:0015924	mannosyl-oligosaccharide mannosidase act...	5	0	0.4	1
GO:0034062	5'-3' RNA polymerase activity	31	1	2.46	1
GO:0051540	metal cluster binding	54	12	4.29	1
GO:1904315	transmitter-gated ion channel activity i...	9	0	0.71	1
GO:0032550	purine ribonucleoside binding	163	12	12.94	1
GO:0032553	ribonucleotide binding	936	63	74.31	1
GO:0032555	purine ribonucleotide binding	928	63	73.68	1
GO:0051020	GTPase binding	86	4	6.83	1
GO:0001883	purine nucleoside binding	163	12	12.94	1
GO:0016903	oxidoreductase activity, acting on the a...	44	9	3.49	1
GO:0010857	calcium-dependent protein kinase activit...	5	0	0.4	1
GO:0061783	peptidoglycan muralytic activity	11	1	0.87	1
GO:0099529	neurotransmitter receptor activity invol...	9	0	0.71	1
GO:0044769	ATPase activity, coupled to transmembran...	14	2	1.11	1
GO:1901682	sulfur compound transmembrane transporte...	10	0	0.79	1
GO:0005326	neurotransmitter transporter activity	18	1	1.43	1
GO:0017076	purine nucleotide binding	931	63	73.92	1
GO:0016769	transferase activity, transferring nitro...	14	0	1.11	1
GO:0036442	hydrogen-exporting ATPase activity	8	1	0.64	1
GO:0005346	purine ribonucleotide transmembrane tran...	18	0	1.43	1
GO:1990939	ATP-dependent microtubule motor activity	12	1	0.95	1

## Sheet: GO Enrichment CC
GO.ID	Term	Annotated	Significant	Expected	weight01KS
GO:0005840	ribosome	164	52	13.09	6.1e-26
GO:0005743	mitochondrial inner membrane	102	44	8.14	2.3e-10
GO:0070469	respiratory chain	36	24	2.87	3.4e-10
GO:0005739	mitochondrion	290	85	23.14	1.1e-09
GO:0015935	small ribosomal subunit	19	5	1.52	7.6e-09
GO:0015934	large ribosomal subunit	17	6	1.36	1.1e-07
GO:0098800	inner mitochondrial membrane protein com...	32	17	2.55	5e-07
GO:0005747	mitochondrial respiratory chain complex ...	11	6	0.88	1e-06
GO:0000502	proteasome complex	33	16	2.63	9.3e-06
GO:0005761	mitochondrial ribosome	14	9	1.12	2.9e-05
GO:0019773	proteasome core complex, alpha-subunit c...	7	6	0.56	4.2e-05
GO:0000276	mitochondrial proton-transporting ATP sy...	6	4	0.48	5.6e-05
GO:0098803	respiratory chain complex	16	10	1.28	0.00032
GO:0005746	mitochondrial respiratory chain	18	10	1.44	0.00035
GO:0005839	proteasome core complex	14	7	1.12	0.00139
GO:0008180	COP9 signalosome	8	4	0.64	0.00145
GO:0022626	cytosolic ribosome	7	1	0.56	0.00185
GO:0045261	proton-transporting ATP synthase complex...	7	2	0.56	0.00285
GO:0005838	proteasome regulatory particle	5	2	0.4	0.01041
GO:0005852	eukaryotic translation initiation factor...	16	0	1.28	0.01178
GO:0031305	integral component of mitochondrial inne...	6	2	0.48	0.0124
GO:1990204	oxidoreductase complex	19	9	1.52	0.01323
GO:0030054	cell junction	60	6	4.79	0.01632
GO:0016282	eukaryotic 43S preinitiation complex	13	0	1.04	0.01852
GO:0033290	eukaryotic 48S preinitiation complex	13	0	1.04	0.01852
GO:0044430	cytoskeletal part	156	14	12.45	0.02485
GO:0033180	proton-transporting V-type ATPase, V1 do...	9	0	0.72	0.02622
GO:0005758	mitochondrial intermembrane space	14	4	1.12	0.02854
GO:0005737	cytoplasm	1512	186	120.67	0.02902
GO:1902495	transmembrane transporter complex	30	3	2.39	0.03346
GO:0005874	microtubule	71	6	5.67	0.0392
GO:0032993	protein-DNA complex	25	1	2	0.06376
GO:0030136	clathrin-coated vesicle	11	0	0.88	0.06704
GO:0005769	early endosome	14	0	1.12	0.07748
GO:0099513	polymeric cytoskeletal fiber	75	7	5.99	0.08278
GO:0005875	microtubule associated complex	37	3	2.95	0.08571
GO:0015629	actin cytoskeleton	47	7	3.75	0.09761
GO:0005813	centrosome	9	1	0.72	0.10366
GO:0045202	synapse	36	3	2.87	0.10709
GO:0005856	cytoskeleton	233	19	18.6	0.10752
GO:0005777	peroxisome	40	4	3.19	0.12002
GO:0005623	cell	3412	264	272.31	0.1223
GO:0016272	prefoldin complex	8	0	0.64	0.14134
GO:0030016	myofibril	7	1	0.56	0.14351
GO:0030120	vesicle coat	16	1	1.28	0.14434
GO:0005753	mitochondrial proton-transporting ATP sy...	7	5	0.56	0.1608
GO:1990351	transporter complex	31	4	2.47	0.16331
GO:0032991	macromolecular complex	1013	115	80.85	0.17193
GO:0031514	motile cilium	6	0	0.48	0.18
GO:0044454	nuclear chromosome part	42	0	3.35	0.19545
GO:0071944	cell periphery	306	19	24.42	0.19856
GO:0099503	secretory vesicle	6	0	0.48	0.20506
GO:0031970	organelle envelope lumen	15	4	1.2	0.22463
GO:0030286	dynein complex	25	2	2	0.2307
GO:0044439	peroxisomal part	10	0	0.8	0.24399
GO:0070013	intracellular organelle lumen	311	20	24.82	0.2445
GO:0031410	cytoplasmic vesicle	100	2	7.98	0.25281
GO:0005741	mitochondrial outer membrane	20	3	1.6	0.25741
GO:0000922	spindle pole	8	0	0.64	0.26071
GO:0031225	anchored component of membrane	23	2	1.84	0.26759
GO:0000407	pre-autophagosomal structure	5	0	0.4	0.2716
GO:1902554	serine/threonine protein kinase complex	7	1	0.56	0.27964
GO:0046540	U4/U6 x U5 tri-snRNP complex	8	0	0.64	0.27984
GO:0044447	axoneme part	6	0	0.48	0.28709
GO:1990904	ribonucleoprotein complex	270	53	21.55	0.29264
GO:0032040	small-subunit processome	8	0	0.64	0.29975
GO:0000776	kinetochore	8	0	0.64	0.30114
GO:0016459	myosin complex	20	3	1.6	0.30437
GO:0012507	ER to Golgi transport vesicle membrane	5	1	0.4	0.30997
GO:0005759	mitochondrial matrix	36	12	2.87	0.31173
GO:0005905	clathrin-coated pit	7	0	0.56	0.31253
GO:0016604	nuclear body	13	0	1.04	0.32409
GO:0045211	postsynaptic membrane	18	2	1.44	0.3278
GO:0005814	centriole	7	0	0.56	0.33852
GO:1990391	DNA repair complex	7	1	0.56	0.35494
GO:0044450	microtubule organizing center part	10	0	0.8	0.35764
GO:0045263	proton-transporting ATP synthase complex...	9	5	0.72	0.35875
GO:0098794	postsynapse	19	2	1.52	0.35892
GO:0120038	plasma membrane bounded cell projection ...	22	0	1.76	0.35927
GO:0048471	perinuclear region of cytoplasm	12	1	0.96	0.3601
GO:0030915	Smc5-Smc6 complex	6	0	0.48	0.3633
GO:0005730	nucleolus	70	2	5.59	0.36466
GO:0098791	Golgi subcompartment	89	5	7.1	0.3739
GO:0032592	integral component of mitochondrial memb...	7	2	0.56	0.37889
GO:0042383	sarcolemma	6	1	0.48	0.38138
GO:0005795	Golgi stack	11	1	0.88	0.38224
GO:0019898	extrinsic component of membrane	9	1	0.72	0.38363
GO:0005869	dynactin complex	6	1	0.48	0.38567
GO:0005921	gap junction	6	1	0.48	0.39624
GO:0031982	vesicle	102	2	8.14	0.39895
GO:0031012	extracellular matrix	10	0	0.8	0.40034
GO:0016010	dystrophin-associated glycoprotein compl...	7	0	0.56	0.4024
GO:0044798	nuclear transcription factor complex	26	0	2.08	0.40633
GO:0010008	endosome membrane	36	1	2.87	0.41022
GO:0015630	microtubule cytoskeleton	119	8	9.5	0.4152
GO:0030659	cytoplasmic vesicle membrane	30	1	2.39	0.42188
GO:0044444	cytoplasmic part	1023	143	81.65	0.42229
GO:0030684	preribosome	14	0	1.12	0.44764
GO:0031981	nuclear lumen	245	4	19.55	0.44779
GO:0005770	late endosome	21	0	1.68	0.45037
GO:0042995	cell projection	68	3	5.43	0.46173
GO:0043189	H4/H2A histone acetyltransferase complex	8	1	0.64	0.46534
GO:0016021	integral component of membrane	2149	178	171.51	0.4747
GO:0031461	cullin-RING ubiquitin ligase complex	16	1	1.28	0.47721
GO:0043231	intracellular membrane-bounded organelle	2249	157	179.49	0.47755
GO:0097458	neuron part	18	0	1.44	0.47888
GO:0005740	mitochondrial envelope	140	47	11.17	0.48374
GO:0044451	nucleoplasm part	135	2	10.77	0.48742
GO:0008076	voltage-gated potassium channel complex	8	0	0.64	0.49101
GO:0098793	presynapse	7	0	0.56	0.50641
GO:0005778	peroxisomal membrane	9	0	0.72	0.50788
GO:0097525	spliceosomal snRNP complex	15	0	1.2	0.50805
GO:0033178	proton-transporting two-sector ATPase co...	17	2	1.36	0.5081
GO:0000775	chromosome, centromeric region	12	0	0.96	0.51914
GO:0005786	signal recognition particle, endoplasmic...	6	0	0.48	0.52244
GO:0030133	transport vesicle	16	1	1.28	0.5237
GO:0033179	proton-transporting V-type ATPase, V0 do...	8	1	0.64	0.54011
GO:0005764	lysosome	32	3	2.55	0.54082
GO:0017053	transcriptional repressor complex	7	0	0.56	0.54661
GO:0031314	extrinsic component of mitochondrial inn...	6	1	0.48	0.55253
GO:0098797	plasma membrane protein complex	21	0	1.68	0.55254
GO:0000793	condensed chromosome	19	0	1.52	0.55303
GO:0005667	transcription factor complex	38	0	3.03	0.55326
GO:0044428	nuclear part	364	10	29.05	0.55527
GO:0031248	protein acetyltransferase complex	29	1	2.31	0.5862
GO:0034704	calcium channel complex	7	1	0.56	0.58747
GO:0005635	nuclear envelope	33	1	2.63	0.59079
GO:0005891	voltage-gated calcium channel complex	6	1	0.48	0.59212
GO:0000813	ESCRT I complex	5	0	0.4	0.59312
GO:0005938	cell cortex	11	0	0.88	0.5933
GO:0030131	clathrin adaptor complex	8	0	0.64	0.60136
GO:0070461	SAGA-type complex	11	0	0.88	0.61563
GO:0042575	DNA polymerase complex	6	0	0.48	0.6264
GO:0000808	origin recognition complex	6	0	0.48	0.62776
GO:0098798	mitochondrial protein complex	36	18	2.87	0.6331
GO:0005929	cilium	54	1	4.31	0.63454
GO:0031301	integral component of organelle membrane	13	2	1.04	0.63598
GO:0044446	intracellular organelle part	1098	96	87.63	0.637
GO:0030014	CCR4-NOT complex	9	1	0.72	0.64232
GO:0043226	organelle	2698	214	215.33	0.64759
GO:0005675	holo TFIIH complex	5	0	0.4	0.65649
GO:0030880	RNA polymerase complex	45	0	3.59	0.66017
GO:0044440	endosomal part	39	1	3.11	0.67906
GO:0044452	nucleolar part	7	0	0.56	0.68008
GO:0072546	ER membrane protein complex	5	0	0.4	0.68701
GO:0000123	histone acetyltransferase complex	27	1	2.15	0.68916
GO:0031011	Ino80 complex	9	0	0.72	0.69178
GO:0044455	mitochondrial membrane part	49	19	3.91	0.69959
GO:0005886	plasma membrane	294	19	23.46	0.70697
GO:0070603	SWI/SNF superfamily-type complex	27	0	2.15	0.71154
GO:0099023	tethering complex	22	0	1.76	0.71199
GO:0031966	mitochondrial membrane	129	47	10.3	0.72612
GO:0017119	Golgi transport complex	6	0	0.48	0.73115
GO:0036452	ESCRT complex	8	0	0.64	0.73538
GO:0005911	cell-cell junction	10	2	0.8	0.73665
GO:0044456	synapse part	26	2	2.08	0.73679
GO:0098805	whole membrane	109	6	8.7	0.7368
GO:0005912	adherens junction	17	1	1.36	0.74088
GO:0005615	extracellular space	47	5	3.75	0.74244
GO:0005643	nuclear pore	22	1	1.76	0.74293
GO:0005685	U1 snRNP	6	0	0.48	0.74303
GO:0005680	anaphase-promoting complex	8	1	0.64	0.7514
GO:0043232	intracellular non-membrane-bounded organ...	594	76	47.41	0.75331
GO:0120025	plasma membrane bounded cell projection	59	1	4.71	0.76178
GO:0005732	small nucleolar ribonucleoprotein comple...	6	0	0.48	0.76338
GO:0005576	extracellular region	315	22	25.14	0.76409
GO:0044427	chromosomal part	98	1	7.82	0.76565
GO:0000785	chromatin	53	1	4.23	0.77326
GO:0098687	chromosomal region	14	0	1.12	0.77608
GO:0090575	RNA polymerase II transcription factor c...	23	0	1.84	0.7768
GO:0034464	BBSome	8	0	0.64	0.78357
GO:0000790	nuclear chromatin	31	0	2.47	0.78631
GO:0033588	Elongator holoenzyme complex	5	1	0.4	0.78678
GO:0042175	nuclear outer membrane-endoplasmic retic...	160	1	12.77	0.78872
GO:0032580	Golgi cisterna membrane	7	1	0.56	0.79082
GO:0000439	core TFIIH complex	5	0	0.4	0.79459
GO:0034703	cation channel complex	18	1	1.44	0.79603
GO:0000786	nucleosome	21	1	1.68	0.80154
GO:0044422	organelle part	1109	96	88.51	0.80208
GO:0005788	endoplasmic reticulum lumen	14	0	1.12	0.80224
GO:0033646	host intracellular part	82	3	6.54	0.80369
GO:0000932	P-body	8	1	0.64	0.80924
GO:0016471	vacuolar proton-transporting V-type ATPa...	6	1	0.48	0.8119
GO:0030665	clathrin-coated vesicle membrane	8	0	0.64	0.81933
GO:0005858	axonemal dynein complex	5	0	0.4	0.82372
GO:0005791	rough endoplasmic reticulum	10	0	0.8	0.82786
GO:0005787	signal peptidase complex	5	0	0.4	0.82891
GO:0000124	SAGA complex	9	0	0.72	0.83629
GO:0035267	NuA4 histone acetyltransferase complex	7	1	0.56	0.83896
GO:0005885	Arp2/3 protein complex	8	1	0.64	0.84153
GO:1902562	H4 histone acetyltransferase complex	10	1	0.8	0.84605
GO:0019867	outer membrane	21	3	1.68	0.85327
GO:0098796	membrane protein complex	140	22	11.17	0.85903
GO:0044445	cytosolic part	15	1	1.2	0.86065
GO:0016020	membrane	2579	228	205.83	0.86117
GO:0031901	early endosome membrane	7	0	0.56	0.8644
GO:0005774	vacuolar membrane	26	3	2.08	0.86579
GO:0005887	integral component of plasma membrane	31	0	2.47	0.86925
GO:0005681	spliceosomal complex	43	0	3.43	0.87446
GO:0098590	plasma membrane region	22	2	1.76	0.87482
GO:1990234	transferase complex	131	3	10.46	0.88036
GO:0019866	organelle inner membrane	106	44	8.46	0.88418
GO:0016591	DNA-directed RNA polymerase II, holoenzy...	37	0	2.95	0.88732
GO:0005783	endoplasmic reticulum	209	4	16.68	0.89877
GO:0030139	endocytic vesicle	5	0	0.4	0.90118
GO:0034702	ion channel complex	22	1	1.76	0.90366
GO:0005669	transcription factor TFIID complex	10	0	0.8	0.90387
GO:0000178	exosome (RNase complex)	7	0	0.56	0.90421
GO:0005815	microtubule organizing center	37	1	2.95	0.90666
GO:0031226	intrinsic component of plasma membrane	33	0	2.63	0.90667
GO:0044431	Golgi apparatus part	100	5	7.98	0.90758
GO:1902494	catalytic complex	275	30	21.95	0.91044
GO:0005794	Golgi apparatus	143	7	11.41	0.91061
GO:0005765	lysosomal membrane	16	2	1.28	0.91124
GO:0016592	mediator complex	25	1	2	0.91196
GO:0036464	cytoplasmic ribonucleoprotein granule	11	1	0.88	0.91342
GO:0005819	spindle	18	0	1.44	0.91375
GO:0071565	nBAF complex	5	0	0.4	0.91394
GO:0008250	oligosaccharyltransferase complex	5	0	0.4	0.91521
GO:0000151	ubiquitin ligase complex	24	1	1.92	0.91588
GO:0098589	membrane region	10	0	0.8	0.91992
GO:0031965	nuclear membrane	15	0	1.2	0.92537
GO:0012505	endomembrane system	422	11	33.68	0.9267
GO:1902555	endoribonuclease complex	7	0	0.56	0.9286
GO:0042025	host cell nucleus	80	3	6.38	0.92865
GO:0030658	transport vesicle membrane	15	1	1.2	0.93019
GO:0005666	DNA-directed RNA polymerase III complex	8	0	0.64	0.9367
GO:0031090	organelle membrane	328	55	26.18	0.93859
GO:0042555	MCM complex	6	0	0.48	0.94164
GO:0005654	nucleoplasm	152	2	12.13	0.9435
GO:0035097	histone methyltransferase complex	9	0	0.72	0.94634
GO:0044448	cell cortex part	9	0	0.72	0.94769
GO:0000145	exocyst	8	0	0.64	0.94844
GO:0008023	transcription elongation factor complex	12	0	0.96	0.94845
GO:0000139	Golgi membrane	83	5	6.62	0.94953
GO:0005694	chromosome	119	2	9.5	0.94986
GO:0030125	clathrin vesicle coat	7	0	0.56	0.95072
GO:0034708	methyltransferase complex	12	0	0.96	0.95307
GO:0030119	AP-type membrane coat adaptor complex	10	0	0.8	0.95366
GO:0030529	intracellular ribonucleoprotein complex	261	53	20.83	0.95377
GO:0044441	ciliary part	21	0	1.68	0.95558
GO:0030126	COPI vesicle coat	5	0	0.4	0.9556
GO:0048188	Set1C/COMPASS complex	5	0	0.4	0.95677
GO:0043234	protein complex	579	58	46.21	0.95711
GO:0061695	transferase complex, transferring phosph...	55	1	4.39	0.9647
GO:0005930	axoneme	8	0	0.64	0.96499
GO:0044815	DNA packaging complex	23	1	1.84	0.96756
GO:0044433	cytoplasmic vesicle part	68	2	5.43	0.96773
GO:0005789	endoplasmic reticulum membrane	159	1	12.69	0.96842
GO:0055037	recycling endosome	5	0	0.4	0.97046
GO:0000228	nuclear chromosome	43	0	3.43	0.97078
GO:0030176	integral component of endoplasmic reticu...	21	0	1.68	0.97126
GO:0030660	Golgi-associated vesicle membrane	15	1	1.2	0.97161
GO:0070161	anchoring junction	18	1	1.44	0.98534
GO:0022624	proteasome accessory complex	6	2	0.48	0.98559
GO:0016514	SWI/SNF complex	6	0	0.48	0.9858
GO:0016528	sarcoplasm	5	0	0.4	0.98627
GO:0043235	receptor complex	5	0	0.4	0.98641
GO:0042765	GPI-anchor transamidase complex	6	0	0.48	0.98676
GO:0032039	integrator complex	8	0	0.64	0.98725
GO:1905354	exoribonuclease complex	8	0	0.64	0.9918
GO:1902911	protein kinase complex	8	1	0.64	0.99185
GO:0044459	plasma membrane part	76	3	6.07	0.99327
GO:0030867	rough endoplasmic reticulum membrane	6	0	0.48	0.99332
GO:0098533	ATPase dependent transmembrane transport...	6	0	0.48	0.99343
GO:0098588	bounding membrane of organelle	186	10	14.84	0.99351
GO:0005634	nucleus	1567	61	125.06	0.99619
GO:0044424	intracellular part	3092	238	246.77	0.99628
GO:0030117	membrane coat	25	1	2	0.99631
GO:0031902	late endosome membrane	13	0	1.04	0.99756
GO:0030663	COPI-coated vesicle membrane	6	0	0.48	0.99878
GO:0016607	nuclear speck	12	0	0.96	0.9989
GO:0008287	protein serine/threonine phosphatase com...	8	0	0.64	0.99891
GO:0005768	endosome	60	1	4.79	0.99897
GO:0005829	cytosol	59	2	4.71	0.99914
GO:0031010	ISWI-type complex	5	0	0.4	0.99966
GO:0097346	INO80-type complex	11	0	0.88	0.99982
GO:0043233	organelle lumen	311	20	24.82	1
GO:0000323	lytic vacuole	32	3	2.55	1
GO:0032806	carboxy-terminal domain protein kinase c...	5	0	0.4	1
GO:0000313	organellar ribosome	14	9	1.12	1
GO:0035770	ribonucleoprotein granule	11	1	0.88	1
GO:0031312	extrinsic component of organelle membran...	6	1	0.48	1
GO:0042579	microbody	40	4	3.19	1
GO:0097708	intracellular vesicle	100	2	7.98	1
GO:0044463	cell projection part	22	0	1.76	1
GO:0044464	cell part	3361	254	268.24	1
GO:0055029	nuclear DNA-directed RNA polymerase comp...	44	0	3.51	1
GO:0030964	NADH dehydrogenase complex	11	6	0.88	1
GO:0005773	vacuole	42	4	3.35	1
GO:0034705	potassium channel complex	8	0	0.64	1
GO:0098573	intrinsic component of mitochondrial mem...	7	2	0.56	1
GO:0044391	ribosomal subunit	36	11	2.87	1
GO:0031224	intrinsic component of membrane	2170	180	173.19	1
GO:0031227	intrinsic component of endoplasmic retic...	21	0	1.68	1
GO:0099568	cytoplasmic region	11	0	0.88	1
GO:0031300	intrinsic component of organelle membran...	13	2	1.04	1
GO:0031304	intrinsic component of mitochondrial inn...	6	2	0.48	1
GO:0033643	host cell part	82	3	6.54	1
GO:1903293	phosphatase complex	8	0	0.64	1
GO:0044421	extracellular region part	57	5	4.55	1
GO:0033647	host intracellular organelle	80	3	6.38	1
GO:0097526	spliceosomal tri-snRNP complex	8	0	0.64	1
GO:0033648	host intracellular membrane-bounded orga...	80	3	6.38	1
GO:0044425	membrane part	2304	203	183.88	1
GO:0031967	organelle envelope	173	48	13.81	1
GO:0031968	organelle outer membrane	20	3	1.6	1
GO:0000152	nuclear ubiquitin ligase complex	8	1	0.64	1
GO:0044429	mitochondrial part	174	59	13.89	1
GO:1905368	peptidase complex	47	16	3.75	1
GO:1905369	endopeptidase complex	33	16	2.63	1
GO:0048475	coated membrane	25	1	2	1
GO:0097060	synaptic membrane	18	2	1.44	1
GO:0098852	lytic vacuole membrane	16	2	1.28	1
GO:0031984	organelle subcompartment	241	6	19.23	1
GO:0030118	clathrin coat	11	0	0.88	1
GO:0031985	Golgi cisterna	7	1	0.56	1
GO:0016469	proton-transporting two-sector ATPase co...	36	8	2.87	1
GO:0033176	proton-transporting V-type ATPase comple...	19	1	1.52	1
GO:0048500	signal recognition particle	6	0	0.48	1
GO:0033177	proton-transporting two-sector ATPase co...	17	6	1.36	1
GO:0031974	membrane-enclosed lumen	311	20	24.82	1
GO:0044432	endoplasmic reticulum part	171	1	13.65	1
GO:0031975	envelope	173	48	13.81	1
GO:0044437	vacuolar part	26	3	2.08	1
GO:0044438	microbody part	10	0	0.8	1
GO:0005622	intracellular	3092	238	246.77	1
GO:0030532	small nuclear ribonucleoprotein complex	15	0	1.2	1
GO:0033202	DNA helicase complex	9	0	0.72	1
GO:0030134	COPII-coated ER to Golgi transport vesic...	5	1	0.4	1
GO:0099512	supramolecular fiber	82	8	6.54	1
GO:0030135	coated vesicle	22	1	1.76	1
GO:0030137	COPI-coated vesicle	6	0	0.48	1
GO:0043292	contractile fiber	7	1	0.56	1
GO:0070993	translation preinitiation complex	13	0	1.04	1
GO:0012506	vesicle membrane	30	1	2.39	1
GO:0098827	endoplasmic reticulum subcompartment	159	1	12.69	1
GO:0099080	supramolecular complex	82	8	6.54	1
GO:0099081	supramolecular polymer	82	8	6.54	1
GO:0097014	ciliary plasm	8	0	0.64	1
GO:1905348	endonuclease complex	7	0	0.56	1
GO:0090665	glycoprotein complex	7	0	0.56	1
GO:0005575	cellular_component	5463	436	436	1
GO:0043656	intracellular region of host	82	3	6.54	1
GO:0043657	host cell	82	3	6.54	1
GO:0000428	DNA-directed RNA polymerase complex	44	0	3.51	1
GO:0031903	microbody membrane	9	0	0.72	1
GO:1902493	acetyltransferase complex	29	1	2.31	1
GO:0043227	membrane-bounded organelle	2307	157	184.12	1
GO:0043228	non-membrane-bounded organelle	594	76	47.41	1
GO:0045259	proton-transporting ATP synthase complex	16	7	1.28	1
GO:0043229	intracellular organelle	2677	214	213.65	1
GO:0044215	other organism	82	3	6.54	1
GO:0044216	other organism cell	82	3	6.54	1
GO:0044217	other organism part	82	3	6.54	1
GO:0030662	coated vesicle membrane	19	1	1.52	1
GO:0005798	Golgi-associated vesicle	15	1	1.2	1
GO:0045271	respiratory chain complex I	11	6	0.88	1
GO:0018995	host	82	3	6.54	1
GO:1904949	ATPase complex	33	0	2.63	1
