# Supplementary material for: Eliminating Mosquitoes with Precision Guided Sterile Males
Source: Research Square preprint supplement (doi:10.21203/rs.3.rs-367110/v1), 2021-04-05
Supplement: Supplementary file 6 [file Table S15 - deseq2_liverpool_pgSIT.annotations.xlsx]

## Sheet: deSeq
Table S17 -deseq2_liverpool_pgSIT.annotations
NCBI_ID	baseMean	log2FoldChange	lfcSE	stat	pvalue	padj	AAEL_ID	gene_description	gene_name	gene_synomym
GFP	678.932	8.89306	0.454928	19.5483	4.27e-85	6.68e-81
LOC5566755	4787.08	-3.62971	0.214892	-16.8909	5.25e-64	4.12e-60	AAEL005621	long wavelength sensitive opsin [Source:VB Community Annotation]	GPROP4
LOC5570131	148.958	2.25398	0.140508	16.0416	6.54e-58	3.42e-54	AAEL008112
CFP	343.191	9.28176	0.616643	15.0521	3.35e-51	1.26e-47
LOC5566757	5122.88	-3.17835	0.21133	-15.0397	4.03e-51	1.26e-47	AAEL005625	long wavelength sensitive opsin [Source:VB Community Annotation]	GPROP5
tdTomato	352.152	7.54481	0.545248	13.8374	1.52e-43	3.96e-40
LOC110675265	76.9657	-3.25691	0.279706	-11.644	2.46e-31	5.51e-28	AAEL027864
LOC110675612	1127.38	1.9141	0.180405	10.6101	2.68e-26	5.24e-23	AAEL022334
LOC5571276	497.488	0.789292	0.0745436	10.5883	3.38e-26	5.88e-23	AAEL001561
LOC110675672	120.807	-1.83105	0.178861	-10.2373	1.35e-24	2.11e-21	AAEL024296
LOC5567244	722.669	-1.31963	0.129673	-10.1765	2.52e-24	3.6e-21	AAEL018055
LOC5566834	213.853	-0.904173	0.0946549	-9.55231	1.27e-21	1.66e-18	AAEL005674
LOC5566540	77.056	-1.38316	0.148237	-9.33077	1.05e-20	1.27e-17	AAEL005465
LOC110681177	232.494	-1.21348	0.13045	-9.30224	1.38e-20	1.54e-17	AAEL023031
hSpCas9	25.6243	7.95017	0.856656	9.28047	1.69e-20	1.76e-17
LOC5571252	221.58	-1.02111	0.110214	-9.26474	1.96e-20	1.92e-17	AAEL001594
LOC5565425	349.558	-1.19089	0.129861	-9.17045	4.71e-20	4.34e-17	AAEL000669
LOC5574006	302.936	-1.89698	0.209053	-9.07415	1.15e-19	9.97e-17	AAEL010853	AMP dependent ligase [Source:VB Community Annotation]
LOC110675360	75.2716	1.48676	0.165367	8.99069	2.46e-19	2.03e-16	AAEL025860
LOC110677668	69.2904	1.33873	0.150514	8.89439	5.87e-19	4.38e-16	AAEL020234
LOC110677670	69.2904	1.33873	0.150514	8.89439	5.87e-19	4.38e-16	AAEL026520
LOC5578161	138.214	1.20092	0.137247	8.75009	2.13e-18	1.52e-15	AAEL013542	elongase, putative [Source:VB Community Annotation]
LOC5573701	701.955	1.19814	0.14064	8.51915	1.61e-17	1.1e-14	AAEL010680
LOC5564296	734.137	0.812789	0.0957865	8.48542	2.15e-17	1.4e-14	AAEL014393	Lactoylglutathione lyase [Source:UniProtKB/TrEMBL;Acc:A0A1S4G1K4]
LOC5563586	316.037	2.38451	0.282578	8.43842	3.22e-17	1.98e-14	AAEL000025	phosphoenolpyruvate carboxykinase [Source:VB Community Annotation]
LOC5580270	172.621	-0.863633	0.102375	-8.43595	3.29e-17	1.98e-14	AAEL003003	glutamate-gated chloride channel [Source:VB Community Annotation]
LOC110676903	57.8592	1.78568	0.212245	8.4133	3.99e-17	2.31e-14	AAEL020835
LOC110681159	2963.28	0.416866	0.0497071	8.38646	5.01e-17	2.71e-14	AAEL021894
LOC5575744	416.55	-1.53539	0.183104	-8.38537	5.06e-17	2.71e-14	AAEL012056	oxysterol-binding protein related protein (ORP1) [Source:VB Community Annotation]	ORP1
LOC110680889	258.21	-2.14912	0.256507	-8.3784	5.37e-17	2.71e-14	AAEL024685
LOC5568061	258.21	-2.14912	0.256507	-8.3784	5.37e-17	2.71e-14	AAEL024685
LOC110676642	536.596	-2.06302	0.24673	-8.36144	6.2e-17	3.03e-14	AAEL020574
LOC110677276	98.6892	1.07968	0.130411	8.27912	1.24e-16	5.89e-14	AAEL024645
LOC110679392	50.9061	-2.34624	0.283705	-8.27	1.34e-16	6.17e-14	AAEL020780
LOC5572311	118.96	-2.09995	0.254409	-8.25423	1.53e-16	6.85e-14	AAEL009697
LOC110676442	116.978	1.16321	0.14141	8.22577	1.94e-16	8.44e-14	AAEL022617
LOC5572788	66.1964	-2.60175	0.316845	-8.21143	2.19e-16	9.13e-14	AAEL001911
LOC5577627	59.7589	-2.43058	0.296055	-8.20987	2.21e-16	9.13e-14	AAEL003265
LOC5574194	101.875	-1.2393	0.151756	-8.16639	3.18e-16	1.28e-13	AAEL002311	ADP-ribosylation factor, putative [Source:VB Community Annotation]
LOC110674783	48.7711	-2.47827	0.304508	-8.13859	4e-16	1.57e-13	AAEL022083
LOC110681201	216.234	-1.02998	0.12747	-8.08023	6.46e-16	2.47e-13	AAEL020314
LOC5578669	63.1255	-2.23539	0.278949	-8.0136	1.11e-15	4.16e-13	AAEL003644	carbonic anhydrase, putative [Source:VB Community Annotation]
LOC5565210	1700.17	0.446105	0.0557453	8.00257	1.22e-15	4.44e-13	AAEL004680	nuclear lamin L1 alpha, putative [Source:VB Community Annotation]
LOC110677976	22.6379	-4.63551	0.580288	-7.98829	1.37e-15	4.87e-13	AAEL020275
LOC110677906	22.7122	-5.22997	0.655456	-7.97914	1.47e-15	5.13e-13	AAEL021107
LOC110678936	494.563	-2.36296	0.296912	-7.95843	1.74e-15	5.94e-13	AAEL026116
LOC5572122	998.161	0.498629	0.0628078	7.93898	2.04e-15	6.61e-13	AAEL009534	dimethyladenosine transferase [Source:VB Community Annotation]
LOC5572121	998.073	0.49842	0.0627864	7.93835	2.05e-15	6.61e-13	AAEL009526
LOC110681176	101.527	-1.1609	0.146258	-7.93732	2.07e-15	6.61e-13	AAEL027395
LOC5578971	245.125	-2.76958	0.349496	-7.92448	2.29e-15	7.18e-13	AAEL013951	nucleosome assembly protein [Source:VB Community Annotation]
LOC110680933	50.6778	1.39457	0.176823	7.88682	3.1e-15	9.52e-13	AAEL026931
LOC5564547	277.729	0.79031	0.100618	7.85454	4.01e-15	1.21e-12	AAEL004306	39S ribosomal protein L19, mitochondrial precursor [Source:UniProtKB/TrEMBL;Acc:Q17D59]	mRpL19
LOC5573669	93.5776	-2.05794	0.262521	-7.83915	4.54e-15	1.34e-12	AAEL010658	orf protein [Source:VB Community Annotation]
LOC5570215	52.1702	-1.23905	0.158327	-7.82587	5.04e-15	1.46e-12	AAEL008156
LOC5570892	387.486	-2.66586	0.341041	-7.81683	5.42e-15	1.53e-12	AAEL027475
LOC110678723	72.8554	-1.98663	0.254185	-7.81568	5.47e-15	1.53e-12	AAEL003999	hyperpolarization activated cyclic nucleotide-gated potassium channel [Source:VB Community Annotation]
LOC5564579	61.6711	-1.90808	0.245226	-7.78093	7.2e-15	1.98e-12	AAEL004339	odorant binding protein OBP17 [Source:VB Community Annotation]	OBP17
LOC110676896	60.4125	-2.38396	0.306897	-7.76793	7.98e-15	2.16e-12	AAEL021299
LOC5564117	1364.26	1.31048	0.169367	7.73755	1.01e-14	2.69e-12	AAEL019408	2-Cys thioredoxin peroxidase [Source:UniProtKB/TrEMBL;Acc:Q8WSF6]
LOC5569125	47.2958	-3.6008	0.467327	-7.70511	1.31e-14	3.41e-12	AAEL007389	long wavelength sensitive opsin [Source:VB Community Annotation]	GPROP7
LOC5567349	199.534	-0.986101	0.128323	-7.68454	1.54e-14	3.94e-12	AAEL006032
LOC110677813	148.323	1.74971	0.228184	7.66796	1.75e-14	4.42e-12	AAEL024098
LOC5565955	1291.18	0.475162	0.0620846	7.65346	1.96e-14	4.87e-12	AAEL005052	Tubulin beta chain [Source:UniProtKB/TrEMBL;Acc:Q17B46]
LOC110679440	26.3785	-2.52978	0.330907	-7.645	2.09e-14	5.04e-12	AAEL026072
LOC110681187	26.3785	-2.52978	0.330907	-7.645	2.09e-14	5.04e-12	AAEL020979
LOC110680232	95.5197	-0.927809	0.121451	-7.63936	2.18e-14	5.11e-12	AAEL027987
LOC110678708	9.98343	-6.87961	0.900551	-7.63933	2.18e-14	5.11e-12	AAEL024801
LOC5572534	3298.96	-0.566438	0.0741944	-7.63452	2.27e-14	5.22e-12	AAEL009859	nucleolar GTP-binding protein [Source:VB Community Annotation]
LOC5572512	221.104	0.734893	0.096773	7.59399	3.1e-14	7.05e-12	AAEL009842	Galectin [Source:UniProtKB/TrEMBL;Acc:Q16UP1]	GALE12
LOC5579024	162.511	0.905788	0.119535	7.57761	3.52e-14	7.88e-12	AAEL013964	60S ribosomal protein L20, putative [Source:UniProtKB/TrEMBL;Acc:Q16HN7]	RpL20
LOC5564347	404.27	-0.715782	0.0945922	-7.56704	3.82e-14	8.43e-12	AAEL004200	DNA replication licensing factor MCM8 [Source:VB Community Annotation]
LOC5574091	251.753	-2.40878	0.318984	-7.55142	4.31e-14	9.37e-12	AAEL002270	testis-specific serine/threonine kinase 22c [Source:VB Community Annotation]
LOC5572966	140.362	0.741692	0.099308	7.4686	8.11e-14	1.74e-11	AAEL010181	mitochondrial ribosomal protein, L51, putative [Source:VB Community Annotation]	mRpL51
LOC5563918	75.2706	-1.97314	0.264643	-7.45584	8.93e-14	1.89e-11	AAEL020652
LOC110674840	584.933	-2.38936	0.320566	-7.45355	9.09e-14	1.89e-11	AAEL021654
LOC5573318	52.3106	-1.57689	0.211595	-7.45243	9.16e-14	1.89e-11	AAEL010413	Cak1 [Source:UniProtKB/TrEMBL;Acc:A0A1S4FQ70]
LOC5572031	29.6967	2.2377	0.300327	7.45088	9.27e-14	1.89e-11	AAEL000223	alpha-glucosidase [Source:VB Community Annotation]
LOC5568093	90.9682	0.935293	0.125996	7.42319	1.14e-13	2.3e-11	AAEL006507
LOC5567897	112.492	-1.73609	0.234277	-7.41042	1.26e-13	2.5e-11	AAEL006350
LOC110677051	433.594	-2.07003	0.279656	-7.40204	1.34e-13	2.63e-11	AAEL023970
LOC5570003	257.461	-0.997624	0.134955	-7.39225	1.44e-13	2.79e-11	AAEL019905
LOC5569471	889.186	-0.44272	0.0600003	-7.37863	1.6e-13	3.04e-11	AAEL007660	suppressor of actin (sac) [Source:VB Community Annotation]
LOC110673979	131.537	0.804751	0.109103	7.37607	1.63e-13	3.04e-11	AAEL001085
LOC5568340	131.537	0.804751	0.109103	7.37607	1.63e-13	3.04e-11	AAEL001089
LOC5573124	245.892	-5.80594	0.788756	-7.36088	1.83e-13	3.37e-11	AAEL002000	zinc carboxypeptidase [Source:VB Community Annotation]
LOC110679190	320.766	-2.58272	0.353469	-7.30676	2.74e-13	4.95e-11	AAEL021957
LOC5576653	22442.2	-0.544636	0.0745456	-7.30608	2.75e-13	4.95e-11	AAEL012686	40S ribosomal protein S23 [Source:UniProtKB/TrEMBL;Acc:Q1HRM5]	RpS23
LOC5576334	56.1257	-1.35254	0.185353	-7.2971	2.94e-13	5.24e-11	AAEL000403
LOC5578091	125.074	-1.83233	0.251564	-7.28373	3.25e-13	5.72e-11	AAEL022878
LOC5569091	221.811	0.745666	0.103166	7.22785	4.91e-13	8.54e-11	AAEL007355	mitochondrial ribosomal protein, S18A, putative [Source:VB Community Annotation]	mRpS18A
LOC110674048	12.3575	-6.73859	0.937386	-7.1887	6.54e-13	1.13e-10	AAEL023189
LOC110678977	26.8785	-2.77665	0.38861	-7.14509	8.99e-13	1.52e-10	AAEL025994
LOC5568553	204.16	0.838667	0.117384	7.14464	9.02e-13	1.52e-10	AAEL001109	Glutaredoxin [Source:UniProtKB/TrEMBL;Acc:Q17M81]
LOC5564066	1089.47	-0.654523	0.0918912	-7.1228	1.06e-12	1.76e-10	AAEL026169
LOC5572102	74.6647	-1.1931	0.16755	-7.12081	1.07e-12	1.77e-10	AAEL009515
LOC110679536	113.506	-2.03164	0.285443	-7.11751	1.1e-12	1.78e-10	AAEL025366
LOC5574862	426.098	1.15025	0.161614	7.11727	1.1e-12	1.78e-10	AAEL011468	protein kinase C inhibitor, putative [Source:VB Community Annotation]
LOC5564921	48506.9	-0.369082	0.0519045	-7.11079	1.15e-12	1.84e-10	AAEL004500	eukaryotic translation elongation factor [Source:VB Community Annotation]
LOC110675671	323.015	-2.30607	0.326392	-7.06534	1.6e-12	2.54e-10	AAEL020943
LOC5576136	81.88	-1.09251	0.15473	-7.06078	1.66e-12	2.58e-10	AAEL024236
LOC5570465	8034.79	-0.501186	0.0709886	-7.0601	1.66e-12	2.58e-10	AAEL026904
LOC110681390	147.184	-0.919224	0.130337	-7.05269	1.75e-12	2.7e-10	AAEL024591
LOC5566003	162.733	-2.36317	0.335329	-7.04732	1.82e-12	2.78e-10	AAEL005108	manganese-iron (Mn-Fe) superoxide dismutase [Source:VB Community Annotation]	MNSOD2
LOC5573763	2161.1	-0.367165	0.0521321	-7.04297	1.88e-12	2.83e-10	AAEL000269
LOC5567039	183.118	-1.69547	0.240767	-7.04197	1.9e-12	2.83e-10	AAEL005777
LOC110676807	107.849	-2.38802	0.33943	-7.03537	1.99e-12	2.94e-10	AAEL025326
LOC5578280	135.858	-2.27833	0.325233	-7.00524	2.47e-12	3.61e-10	AAEL013598
LOC5573055	354.214	-1.95099	0.27888	-6.99582	2.64e-12	3.83e-10	AAEL022748
LOC110681241	116.89	1.43758	0.205579	6.99281	2.69e-12	3.87e-10	AAEL027458
LOC5571952	241.311	1.7548	0.25128	6.98344	2.88e-12	4.1e-10	AAEL009438	regulator of telomere elongation helicase 1 rtel1 [Source:VB Community Annotation]
LOC110678099	49.1873	-2.56017	0.366768	-6.98035	2.94e-12	4.13e-10	AAEL026824
LOC5566173	185.456	-1.38077	0.197815	-6.98013	2.95e-12	4.13e-10	AAEL005230
LOC5577020	245.263	-2.24692	0.322061	-6.97669	3.02e-12	4.19e-10	AAEL012937
LOC110675885	492.422	-2.21767	0.319129	-6.94913	3.68e-12	5.05e-10	AAEL026591
LOC5564994	300.61	0.652175	0.0939993	6.93808	3.97e-12	5.42e-10	AAEL004527	mitochondrial ribosomal protein S7 [Source:VB Community Annotation]	mRpS7
LOC110678707	6.47655	-6.24892	0.901961	-6.92815	4.26e-12	5.76e-10	AAEL020039
LOC5568977	79.3927	0.957827	0.138318	6.92481	4.37e-12	5.85e-10	AAEL007275	aldo-keto reductase [Source:VB Community Annotation]
LOC5564792	638.855	-0.52411	0.0757654	-6.91755	4.6e-12	6.1e-10	AAEL004445	DEAD box ATP-dependent RNA helicase [Source:VB Community Annotation]
LOC5568610	40.4277	1.264	0.182999	6.90712	4.95e-12	6.51e-10	AAEL028171
LOC5570205	3023.1	0.991387	0.143558	6.90582	4.99e-12	6.52e-10	AAEL008167	aspartate ammonia lyase [Source:VB Community Annotation]
LOC5575748	268.06	-0.916625	0.133186	-6.88227	5.89e-12	7.63e-10	AAEL012057	enhancer of polycomb [Source:VB Community Annotation]
LOC110674297	226.01	-2.03366	0.296331	-6.86282	6.75e-12	8.62e-10	AAEL027207
LOC5575539	232.862	-2.05615	0.299623	-6.86247	6.77e-12	8.62e-10	AAEL002674
LOC5576472	1462.19	0.436415	0.0636484	6.85665	7.05e-12	8.91e-10	AAEL002886	thioredoxin reductase [Source:VB Community Annotation]
LOC110678874	52.4669	-2.10884	0.307628	-6.85515	7.12e-12	8.93e-10	AAEL024081
LOC5575143	260.109	0.588725	0.0860749	6.83968	7.94e-12	9.87e-10	AAEL012974	Glycine cleavage system H protein [Source:UniProtKB/TrEMBL;Acc:Q0IE94]
LOC5568797	375.134	-1.9177	0.280441	-6.83816	8.02e-12	9.9e-10	AAEL019763
LOC5569539	673.775	0.585421	0.0856666	6.83371	8.27e-12	1.01e-09	AAEL007713	viral IAP-associated factor, putative [Source:VB Community Annotation]
LOC23687987	24.8579	-4.93835	0.724913	-6.81234	9.6e-12	1.17e-09	AAEL017567
LOC110675678	79.1045	-2.23954	0.328838	-6.81046	9.73e-12	1.17e-09	AAEL027651
LOC110678426	110.068	-0.773022	0.113645	-6.8021	1.03e-11	1.23e-09	AAEL024090
LOC5569177	130.163	-2.32016	0.341427	-6.79547	1.08e-11	1.28e-09	AAEL007434	testis-specific serine/threonine kinase 22c [Source:VB Community Annotation]
LOC5578296	316.269	-1.26274	0.186045	-6.78727	1.14e-11	1.34e-09	AAEL019622
LOC5566110	669.712	0.857289	0.126322	6.78655	1.15e-11	1.34e-09	AAEL005179
LOC5564326	513.353	-0.463276	0.0682987	-6.78309	1.18e-11	1.37e-09	AAEL019671
LOC5564757	145.403	1.47789	0.218533	6.76279	1.35e-11	1.56e-09	AAEL014604	cytochrome P450 [Source:VB Community Annotation]
LOC5566367	29.418	-2.82763	0.418221	-6.7611	1.37e-11	1.57e-09	AAEL021480
LOC5577323	351.15	-1.35836	0.201151	-6.75296	1.45e-11	1.64e-09	AAEL000432	nucleosome assembly protein [Source:VB Community Annotation]
LOC5579398	192.981	-2.41502	0.357695	-6.7516	1.46e-11	1.65e-09	AAEL015481	neuronal calcium sensor, putative [Source:VB Community Annotation]
LOC5573699	241.124	-1.70124	0.25223	-6.74481	1.53e-11	1.72e-09	AAEL010682	armc4 [Source:VB Community Annotation]
LOC110674063	135.262	-1.0313	0.152947	-6.7429	1.55e-11	1.73e-09	AAEL023680
LOC110678075	27.97	-2.13964	0.317938	-6.72974	1.7e-11	1.88e-09	AAEL019815
LOC110680307	37.1184	-2.37137	0.352666	-6.72412	1.77e-11	1.94e-09	AAEL020907
LOC5576896	1115.44	-0.427124	0.0636704	-6.70836	1.97e-11	2.14e-09	AAEL003039	nonsense-mediated mRNA decay protein [Source:VB Community Annotation]
LOC5564085	354.585	-0.829166	0.123783	-6.69853	2.11e-11	2.26e-09	AAEL014303	neuroligin, [Source:VB Community Annotation]
LOC5570517	183.056	0.903631	0.134903	6.69836	2.11e-11	2.26e-09	AAEL001439	mitochondrial ribosomal protein, L22, putative [Source:VB Community Annotation]	mRpL22
LOC5568260	13667.5	-0.389034	0.0582263	-6.68142	2.37e-11	2.52e-09	AAEL006698	60S ribosomal protein L31 [Source:UniProtKB/Swiss-Prot;Acc:Q9GN74]	RpL31
LOC5575271	254.408	-0.568909	0.0852482	-6.67356	2.5e-11	2.64e-09	AAEL011736	cyclohex-1-ene-1-carboxyl-CoA hydratase, putative [Source:VB Community Annotation]
LOC5571284	795.034	-0.613818	0.0919916	-6.67254	2.51e-11	2.64e-09	AAEL001540	ubiquitin specific protease [Source:VB Community Annotation]
LOC110676645	11.967	-5.40534	0.813175	-6.64721	2.99e-11	3.12e-09	AAEL024004
LOC5570381	42.244	-2.19569	0.331609	-6.62132	3.56e-11	3.69e-09	AAEL018153
LOC5573415	114.325	-0.925382	0.139894	-6.61486	3.72e-11	3.83e-09	AAEL019733
LOC5568633	980.151	0.318463	0.0481617	6.61237	3.78e-11	3.87e-09	AAEL007023	estradiol 17 beta-dehydrogenase [Source:VB Community Annotation]
LOC110677252	32.3136	1.33128	0.201363	6.61136	3.81e-11	3.87e-09	AAEL021895
LOC5565800	962.608	0.573012	0.0869138	6.59288	4.31e-11	4.34e-09	AAEL005003	serine/threonine-protein kinase, putative [Source:VB Community Annotation]
LOC5573232	147.144	0.909533	0.137959	6.59275	4.32e-11	4.34e-09	AAEL010323
LOC110680448	17.0532	-2.57618	0.390823	-6.59167	4.35e-11	4.34e-09	AAEL024450
LOC5570221	54.0483	1.28801	0.195718	6.58094	4.67e-11	4.62e-09	AAEL008165
LOC110679095	44.7646	-2.25977	0.343419	-6.58021	4.7e-11	4.62e-09	AAEL022342
LOC5565913	77.3115	-1.75597	0.266884	-6.57952	4.72e-11	4.62e-09	AAEL000694
LOC5577489	17389.6	-0.48433	0.0737773	-6.56476	5.21e-11	5.05e-09	AAEL013229	Tubulin alpha chain [Source:UniProtKB/TrEMBL;Acc:Q16JS3]
LOC5573650	32.2225	-2.18671	0.333107	-6.5646	5.22e-11	5.05e-09	AAEL010639
LOC5567198	39.9994	-1.96428	0.299773	-6.55254	5.66e-11	5.44e-09	AAEL019837
LOC110679323	111.126	-2.29502	0.350443	-6.54893	5.8e-11	5.52e-09	AAEL022858
LOC5574515	6285.99	-0.484078	0.0739228	-6.54843	5.81e-11	5.52e-09	AAEL019717	Mitochondrial phosphate carrier protein [Source:UniProtKB/TrEMBL;Acc:Q1HQX9]
LOC5564297	739.286	0.57075	0.0872591	6.54086	6.12e-11	5.77e-09	AAEL000590	Defense repressor 1 [Source:VB Community Annotation]	DNR1
LOC5573756	200.306	0.834375	0.127998	6.51868	7.09e-11	6.66e-09	AAEL000297	mitochondrial ribosomal protein S25 [Source:VB Community Annotation]	mRpS25
LOC5573307	179.927	-0.615185	0.0945067	-6.50944	7.54e-11	7.04e-09	AAEL010395	beat protein [Source:VB Community Annotation]
LOC110674107	19.0705	-2.8482	0.437687	-6.50738	7.65e-11	7.09e-09	AAEL022476
LOC110676038	706.901	-2.09246	0.322279	-6.4927	8.43e-11	7.76e-09	AAEL021334
LOC5569746	30.6497	-1.75017	0.269589	-6.49199	8.47e-11	7.76e-09	AAEL007875
LOC5569968	14709.8	0.420132	0.0647651	6.48701	8.76e-11	7.91e-09	AAEL020092
LOC5564922	274.765	0.881085	0.135826	6.48685	8.76e-11	7.91e-09	AAEL004490	Putative prohibitins and stomatins of the pid superfamily protein [Source:UniProtKB/TrEMBL;Acc:A0A0P6ITV8]
LOC110679094	39.0001	-2.07098	0.319344	-6.48512	8.87e-11	7.91e-09	AAEL026842
LOC5575828	1195.8	0.433022	0.0667732	6.48497	8.88e-11	7.91e-09	AAEL012095	26S protease regulatory subunit [Source:VB Community Annotation]
LOC5578107	2612.18	0.375884	0.057964	6.48478	8.89e-11	7.91e-09	AAEL003407
LOC5571123	39.5975	-1.96632	0.303395	-6.48106	9.11e-11	8.06e-09	AAEL001537	bax inhibitor [Source:VB Community Annotation]
LOC5578117	965.171	1.28377	0.198115	6.47994	9.18e-11	8.08e-09	AAEL003417	mitochondrial ATPase inhibitor, putative [Source:VB Community Annotation]
LOC5576483	215.102	1.18289	0.182608	6.47775	9.31e-11	8.14e-09	AAEL002898
LOC5574100	818.747	0.618595	0.0955173	6.47626	9.4e-11	8.14e-09	AAEL002271	26S proteasome regulatory subunit S3 [Source:UniProtKB/TrEMBL;Acc:Q17IR8]
LOC5564791	139.173	0.732239	0.113066	6.47622	9.4e-11	8.14e-09	AAEL004433	mitochondrial ribosomal protein, L14, putative [Source:VB Community Annotation]	mRpL14
LOC5567245	2349.13	-0.438269	0.06783	-6.46128	1.04e-10	8.94e-09	AAEL019654
LOC5574182	62.0751	1.08842	0.168618	6.45491	1.08e-10	9.27e-09	AAEL002284	mediator of RNA polymerase II transcription subunit 18 (Med18) [Source:VB Community Annotation]	Med18
LOC5571701	190.936	0.755602	0.117148	6.44998	1.12e-10	9.53e-09	AAEL009225	mitochondrial ribosome recycling factor [Source:VB Community Annotation]
LOC5571738	797.38	-0.752774	0.116998	-6.43406	1.24e-10	1.05e-08	AAEL009259
LOC5564220	212.288	-1.66569	0.25992	-6.40849	1.47e-10	1.24e-08	AAEL025390
LOC110681562	214.474	-2.75212	0.430425	-6.39395	1.62e-10	1.35e-08	AAEL020571
LOC5564469	1034.84	0.481926	0.0755824	6.37616	1.82e-10	1.51e-08	AAEL014452	acyl-coa dehydrogenase [Source:VB Community Annotation]
LOC5563731	94.3409	-0.891357	0.13989	-6.37184	1.87e-10	1.55e-08	AAEL014084	kinesin eg-5 [Source:VB Community Annotation]
LOC5576331	321.242	-0.769008	0.120756	-6.3683	1.91e-10	1.58e-08	AAEL022485
LOC5578116	175.433	0.829011	0.130297	6.36245	1.99e-10	1.63e-08	AAEL003409	39S ribosomal protein L15, mitochondrial [Source:VB Community Annotation]	mRpL15
LOC5578279	648.054	-0.567385	0.0891879	-6.36169	2e-10	1.63e-08	AAEL021732
LOC110676401	20.1952	-7.22916	1.13756	-6.35495	2.08e-10	1.69e-08	AAEL025615
LOC110678998	46.7304	-5.53613	0.872579	-6.34455	2.23e-10	1.8e-08	AAEL021439
LOC5579929	106.918	1.29623	0.204332	6.34376	2.24e-10	1.8e-08	AAEL006805	cytochrome P450 [Source:VB Community Annotation]	CYP9J2
LOC5577393	587.433	-2.00195	0.316062	-6.33403	2.39e-10	1.91e-08	AAEL003177
LOC5574653	202.402	-0.870618	0.137528	-6.33045	2.44e-10	1.94e-08	AAEL011287	ubiquitin specific protease [Source:VB Community Annotation]
LOC110676402	28.4026	-5.50739	0.870565	-6.32623	2.51e-10	1.99e-08	AAEL021914
LOC23687681	30.1681	-1.80916	0.286452	-6.31576	2.69e-10	2.12e-08	AAEL028056
LOC110676045	27081.2	-0.480994	0.0761949	-6.31268	2.74e-10	2.15e-08	AAEL022286	40S ribosomal protein S27 [Source:UniProtKB/TrEMBL;Acc:Q1HR58]
LOC5578886	645.079	-1.12497	0.178362	-6.30721	2.84e-10	2.22e-08	AAEL013887
LOC5578625	18427.2	-0.418442	0.0663905	-6.30274	2.92e-10	2.27e-08	AAEL003582	40S ribosomal protein S13 [Source:UniProtKB/TrEMBL;Acc:Q5QC94]	RpS13
LOC5578966	334.869	-0.466747	0.074261	-6.28522	3.27e-10	2.53e-08	AAEL013950	DEAD box ATP-dependent RNA helicase [Source:VB Community Annotation]
LOC5568474	153.856	1.64277	0.261461	6.28304	3.32e-10	2.55e-08	AAEL006890
LOC5570466	338.277	-0.615867	0.0980425	-6.28163	3.35e-10	2.56e-08	AAEL008354	gaba receptor invertebrate [Source:VB Community Annotation]
LOC5566538	138.036	-1.03389	0.16462	-6.2805	3.37e-10	2.57e-08	AAEL018342
LOC110681087	7564.83	-0.483231	0.0769923	-6.27635	3.47e-10	2.62e-08	AAEL025939
LOC5566741	87.4937	-1.82644	0.291301	-6.26996	3.61e-10	2.72e-08	AAEL005595
LOC5571874	565.006	-0.42839	0.0683817	-6.26468	3.74e-10	2.8e-08	AAEL024528
LOC110678505	27.196	-5.71727	0.913314	-6.25991	3.85e-10	2.87e-08	AAEL021766
LOC5580253	230.023	-0.775199	0.124102	-6.24648	4.2e-10	3.12e-08	AAEL012547	lkb1 interacting protein [Source:VB Community Annotation]
LOC110675324	49.561	1.23914	0.198513	6.2421	4.32e-10	3.19e-08	AAEL022120
LOC5564072	195.152	1.03082	0.165231	6.23864	4.41e-10	3.24e-08	AAEL004067	mitochondrial benzodiazepine receptor, putative [Source:VB Community Annotation]
LOC5570219	1567.49	1.05965	0.169867	6.23815	4.43e-10	3.24e-08	AAEL024456
LOC5574761	106.646	-2.09822	0.336491	-6.23558	4.5e-10	3.28e-08	AAEL011406	cytochrome c oxidase polypeptide [Source:VB Community Annotation]
LOC5572945	142.349	-0.940829	0.150921	-6.23394	4.55e-10	3.3e-08	AAEL010162
LOC110677272	104.31	-2.27829	0.365666	-6.23051	4.65e-10	3.36e-08	AAEL023913
LOC110680876	198.474	-1.93189	0.3108	-6.21588	5.1e-10	3.67e-08	AAEL020758
LOC5574180	154.704	0.632436	0.101767	6.21457	5.15e-10	3.68e-08	AAEL002304	porphobilinogen synthase [Source:VB Community Annotation]
LOC5571915	33.7746	-1.41515	0.228084	-6.20453	5.49e-10	3.91e-08	AAEL018177
LOC5573954	799.259	-0.534305	0.0861972	-6.19864	5.7e-10	4.04e-08	AAEL002240	signal transducing adapter molecule (stam) [Source:VB Community Annotation]
LOC5577972	38.2213	-4.9762	0.803398	-6.19395	5.87e-10	4.14e-08	AAEL013449	metalloproteinase, putative [Source:VB Community Annotation]
LOC110676515	126.675	0.764299	0.123497	6.18882	6.06e-10	4.26e-08	AAEL023511
LOC5579449	119.2	-1.98562	0.321254	-6.18083	6.38e-10	4.46e-08	AAEL024990
LOC110675538	117.353	-2.07496	0.335957	-6.17627	6.56e-10	4.57e-08	AAEL024347
LOC5564510	513.852	-1.47489	0.238883	-6.1741	6.65e-10	4.61e-08	AAEL004278
LOC5575988	713.879	-0.682349	0.110634	-6.16763	6.93e-10	4.79e-08	AAEL002769	homeobox protein prospero/prox-1 [Source:VB Community Annotation]
LOC5574135	100.854	-1.02703	0.166657	-6.16254	7.16e-10	4.92e-08	AAEL019741
LOC5579181	18.1967	-2.51809	0.408892	-6.15833	7.35e-10	5.03e-08	AAEL003867
LOC110678884	85.2524	-1.92181	0.312374	-6.15228	7.64e-10	5.2e-08	AAEL022181
LOC110678870	27.8938	2.10511	0.342306	6.14979	7.76e-10	5.26e-08	AAEL025813
LOC5576763	176.328	-2.13271	0.346895	-6.14801	7.85e-10	5.3e-08	AAEL012748
LOC5563941	374.787	-1.89382	0.308097	-6.14682	7.91e-10	5.32e-08	AAEL014242
LOC5566698	1008.42	-1.17596	0.191557	-6.13892	8.31e-10	5.56e-08	AAEL005575	transient receptor potential channel 4, [Source:VB Community Annotation]
LOC5574726	266.443	-0.944964	0.154143	-6.13044	8.76e-10	5.84e-08	AAEL011366
LOC110678873	46.5635	-2.02453	0.330392	-6.12766	8.92e-10	5.92e-08	AAEL021064
LOC5573264	411.924	-1.82801	0.299013	-6.11347	9.75e-10	6.45e-08	AAEL010365	lamin, putative [Source:VB Community Annotation]
LOC110674026	127.56	-2.93736	0.480592	-6.11197	9.84e-10	6.48e-08	AAEL027106
LOC5564630	227.118	-0.60473	0.0990634	-6.10447	1.03e-09	6.76e-08	AAEL004383
LOC5568877	94.5631	-1.83338	0.300428	-6.10256	1.04e-09	6.82e-08	AAEL007188
LOC110678788	32.0976	3.89655	0.638787	6.09993	1.06e-09	6.9e-08	AAEL023707
LOC5578221	137.641	1.13511	0.186197	6.09627	1.09e-09	7.03e-08	AAEL024259
LOC110676418	31.4046	1.50462	0.246929	6.09334	1.11e-09	7.13e-08	AAEL027172
LOC110675600	4.48376	-5.78633	0.950136	-6.09	1.13e-09	7.25e-08	AAEL021818
LOC5565798	45.6124	-1.27959	0.210201	-6.08748	1.15e-09	7.34e-08	AAEL004999
LOC5569507	137.603	-1.17553	0.193184	-6.08503	1.16e-09	7.42e-08	AAEL007684	tektin, putative [Source:VB Community Annotation]
LOC5575531	287.197	-0.810534	0.133224	-6.08397	1.17e-09	7.44e-08	AAEL011907
LOC110675358	140.261	2.3454	0.385926	6.07734	1.22e-09	7.72e-08	AAEL025157
LOC5576417	104.039	1.22472	0.201744	6.07066	1.27e-09	8.02e-08	AAEL018241
LOC5578638	798.732	1.00751	0.165998	6.06937	1.28e-09	8.05e-08	AAEL013789
LOC5576237	13427.7	-0.647344	0.106701	-6.06689	1.3e-09	8.14e-08	AAEL018288
LOC5578148	460.01	-0.483902	0.0798037	-6.06365	1.33e-09	8.27e-08	AAEL013541	syntaxin [Source:VB Community Annotation]
LOC5568975	263.72	-0.56683	0.0935929	-6.05633	1.39e-09	8.63e-08	AAEL007256	DNA helicase recq1 [Source:VB Community Annotation]
LOC5570046	783.142	-0.599698	0.0990738	-6.05304	1.42e-09	8.77e-08	AAEL018225
LOC110674016	551.427	-2.1898	0.361886	-6.05109	1.44e-09	8.81e-08	AAEL022632
LOC110679507	63.0268	-1.3389	0.221267	-6.05103	1.44e-09	8.81e-08	AAEL025552
LOC110675909	21.058	-2.15827	0.356796	-6.04904	1.46e-09	8.88e-08	AAEL020991
LOC110675429	113.795	-2.04521	0.338151	-6.04822	1.46e-09	8.9e-08	AAEL026523
LOC5567494	507.995	0.615453	0.101851	6.04265	1.52e-09	9.17e-08	AAEL000941	mitochondrial inner membrane protein translocase, 8kD-subunit, putative [Source:VB Community Annotation]
LOC110680405	123.642	-0.759957	0.126002	-6.03131	1.63e-09	9.8e-08	AAEL020945
LOC5579960	1596.44	-0.423545	0.0702581	-6.02842	1.66e-09	9.94e-08	AAEL023547
LOC5563688	171.751	-2.25677	0.374512	-6.02591	1.68e-09	1.01e-07	AAEL000542	Amine oxidase [Source:UniProtKB/TrEMBL;Acc:Q17NY9]
LOC110677731	50.6012	-1.09374	0.181548	-6.02452	1.7e-09	1.01e-07	AAEL021862
LOC110676664	58.5789	-1.6675	0.276836	-6.02343	1.71e-09	1.01e-07	AAEL025474
LOC110676122	50.8087	-1.59577	0.265086	-6.01984	1.75e-09	1.03e-07	AAEL023908
LOC5564316	198.181	-0.618219	0.102704	-6.0194	1.75e-09	1.03e-07	AAEL000595	beat protein [Source:VB Community Annotation]
LOC110678544	40.3925	-1.28234	0.213219	-6.01417	1.81e-09	1.06e-07	AAEL026924
LOC110680875	191.21	-2.07511	0.345128	-6.01258	1.83e-09	1.07e-07	AAEL023277
LOC5567130	83.385	-2.22033	0.369633	-6.00683	1.89e-09	1.1e-07	AAEL005891	calmodulin [Source:VB Community Annotation]
LOC5573004	123.108	0.843177	0.140405	6.00533	1.91e-09	1.11e-07	AAEL001943	mitochondrial ribosomal protein, S34, putative [Source:VB Community Annotation]	mRpS34
LOC5578950	106.883	-1.82809	0.304623	-6.00115	1.96e-09	1.13e-07	AAEL013918	tetraspanin, putative [Source:VB Community Annotation]
LOC110679216	551.359	-4.0606	0.67702	-5.99776	2e-09	1.15e-07	AAEL021166
LOC5577378	101.323	-0.810085	0.135085	-5.99687	2.01e-09	1.15e-07	AAEL000420	cathepsin o [Source:VB Community Annotation]
LOC5580328	44.9259	-2.71191	0.452664	-5.991	2.09e-09	1.19e-07	AAEL013073
LOC110679324	110.055	-2.20916	0.368796	-5.99019	2.1e-09	1.19e-07	AAEL022491
LOC110675413	4.13973	-5.61283	0.937461	-5.98727	2.13e-09	1.21e-07	AAEL025767
LOC110676679	356.67	-0.51116	0.0854915	-5.97907	2.24e-09	1.27e-07	AAEL022190
LOC110674446	109.857	-2.05668	0.344049	-5.97786	2.26e-09	1.27e-07	AAEL022973
LOC110678704	14.4272	2.02148	0.338235	5.97657	2.28e-09	1.28e-07	AAEL023039
LOC110679245	198.02	-2.27428	0.380559	-5.97615	2.28e-09	1.28e-07	AAEL028116
LOC5570243	17842.9	-0.457841	0.076763	-5.96435	2.46e-09	1.37e-07	AAEL008192	40S ribosomal protein S3 [Source:UniProtKB/TrEMBL;Acc:Q4F6X0]	RpS3
LOC5569655	151.93	-0.704284	0.118216	-5.95763	2.56e-09	1.42e-07	AAEL007805
LOC5565445	295.253	-1.56549	0.263091	-5.95038	2.68e-09	1.48e-07	AAEL000670	methionine sulfoxide reductase [Source:VB Community Annotation]
LOC110675757	94.3704	-2.20372	0.370729	-5.94429	2.78e-09	1.53e-07	AAEL025770
LOC110675555	3.83518	-5.5603	0.936096	-5.93988	2.85e-09	1.57e-07	AAEL020767
LOC5570779	135.461	0.579289	0.097667	5.93126	3.01e-09	1.65e-07	AAEL008553
LOC5578256	121.553	0.902009	0.152193	5.92675	3.09e-09	1.69e-07	AAEL014883	dynactin, p27-subunit, putative [Source:VB Community Annotation]
LOC110678610	165.389	0.798861	0.134842	5.92442	3.13e-09	1.71e-07	AAEL020450
LOC5579990	991.165	0.409053	0.0690673	5.92253	3.17e-09	1.72e-07	AAEL001742
LOC110676470	58.6996	0.924106	0.156259	5.91394	3.34e-09	1.8e-07	AAEL026236
LOC5567967	31.1693	-6.72791	1.13792	-5.91245	3.37e-09	1.82e-07	AAEL006414	trypsin [Source:VB Community Annotation]
LOC5574929	1409.13	0.56157	0.0950259	5.90965	3.43e-09	1.84e-07	AAEL011527	eukaryotic translation initiation factor [Source:VB Community Annotation]
LOC5571598	385.395	0.415533	0.0704773	5.89598	3.72e-09	1.99e-07	AAEL009183	cytochrome oxidase biogenesis protein (oxa1 mitochondrial) [Source:VB Community Annotation]
LOC5563871	166.139	-2.02852	0.344121	-5.89478	3.75e-09	2e-07	AAEL014193
LOC5577392	263.761	-0.653369	0.111019	-5.88521	3.98e-09	2.11e-07	AAEL027664
LOC5568509	56.7888	-2.08014	0.353498	-5.88445	3.99e-09	2.11e-07	AAEL006924
LOC5572686	73.4491	-2.0629	0.350787	-5.88076	4.08e-09	2.15e-07	AAEL009963
LOC5564174	57.0337	-1.20022	0.204335	-5.8738	4.26e-09	2.24e-07	AAEL013042
LOC5564192	34.9198	-1.44097	0.245472	-5.87021	4.35e-09	2.28e-07	AAEL014343
LOC110677987	458.344	-2.04599	0.348566	-5.86974	4.36e-09	2.28e-07	AAEL024137
LOC5572244	120.791	-1.95537	0.33333	-5.86616	4.46e-09	2.32e-07	AAEL026066
LOC110676837	23.5171	-1.40343	0.239256	-5.8658	4.47e-09	2.32e-07	AAEL022401
LOC110679214	20.2235	-1.71276	0.292095	-5.86371	4.53e-09	2.34e-07	AAEL020266
LOC110676057	11.8278	-3.32175	0.567023	-5.85822	4.68e-09	2.41e-07	AAEL027327
LOC5577559	233.341	0.679196	0.115987	5.85579	4.75e-09	2.44e-07	AAEL020960	Carboxypeptidase A [Source:UniProtKB/TrEMBL;Acc:Q6J6D9]
LOC5566248	63.8163	-2.24211	0.382909	-5.85547	4.76e-09	2.44e-07	AAEL015106
LOC5565838	48.802	-2.11174	0.360926	-5.85089	4.89e-09	2.49e-07	AAEL005044
LOC5566764	107.312	-2.09171	0.357521	-5.8506	4.9e-09	2.49e-07	AAEL005630
LOC5576673	68.1456	2.06179	0.352415	5.85047	4.9e-09	2.49e-07	AAEL026023
LOC5572215	184.878	-0.940744	0.161204	-5.83573	5.36e-09	2.71e-07	AAEL009630	high-affinity cgmp-specific 3,5-cyclic phosphodiesterase [Source:VB Community Annotation]
LOC5575379	90.8594	-1.41098	0.241881	-5.83337	5.43e-09	2.74e-07	AAEL011774	sarcolemmal associated protein, putative [Source:VB Community Annotation]
LOC5577102	57.3091	-0.884093	0.151756	-5.82577	5.69e-09	2.86e-07	AAEL018251
LOC110678697	6.01013	-5.22596	0.899816	-5.80781	6.33e-09	3.17e-07	AAEL026339
LOC5570223	76.4867	1.00083	0.172357	5.80673	6.37e-09	3.18e-07	AAEL008157
LOC110675810	388.103	0.410399	0.070681	5.80635	6.39e-09	3.18e-07	AAEL009183	cytochrome oxidase biogenesis protein (oxa1 mitochondrial) [Source:VB Community Annotation]
LOC5580066	155.675	0.807445	0.139133	5.80341	6.5e-09	3.22e-07	AAEL002148
LOC5566170	33.5818	-2.4654	0.424857	-5.80289	6.52e-09	3.22e-07	AAEL005222	calmodulin [Source:VB Community Annotation]
LOC5572725	43701.1	-0.425354	0.0733306	-5.8005	6.61e-09	3.25e-07	AAEL009994	60S ribosomal protein L4 [Source:UniProtKB/TrEMBL;Acc:Q1HQJ0]	RpL4
LOC110675956	7.14049	-4.9627	0.855567	-5.80048	6.61e-09	3.25e-07	AAEL024728
LOC5566531	726.799	-0.342844	0.0591857	-5.79269	6.93e-09	3.39e-07	AAEL027240
LOC110678734	63173.4	-0.235733	0.0407137	-5.79002	7.04e-09	3.44e-07	AAEL019403	Heat shock cognate 70 [Source:UniProtKB/TrEMBL;Acc:Q1HQZ5]
LOC110679637	57.3093	-1.88364	0.325572	-5.78564	7.22e-09	3.52e-07	AAEL021962
LOC110676683	50.4686	-1.09146	0.188869	-5.77893	7.52e-09	3.65e-07	AAEL021911
LOC5568923	210.639	-0.532574	0.0922705	-5.77188	7.84e-09	3.79e-07	AAEL007227
LOC5568462	236.009	-0.868904	0.150758	-5.76356	8.24e-09	3.97e-07	AAEL019879
LOC110678949	14563.5	-0.504797	0.0876368	-5.7601	8.41e-09	4.04e-07	AAEL022104	Ribosomal protein L3 [Source:UniProtKB/TrEMBL;Acc:Q1HR77]
LOC5574489	82.7057	-1.86482	0.323852	-5.75826	8.5e-09	4.07e-07	AAEL018283
LOC110674796	236.569	0.533551	0.0926672	5.75771	8.53e-09	4.07e-07	AAEL022712
LOC5563952	63.6939	1.49044	0.258877	5.75731	8.55e-09	4.07e-07	AAEL004022
LOC5570705	309.011	-0.774749	0.134847	-5.74541	9.17e-09	4.35e-07	AAEL001442	map-kinase activating death domain protein (madd)/denn/aex-3(c.elegans) [Source:VB Community Annotation]
LOC5570058	162.611	-0.857415	0.149537	-5.73379	9.82e-09	4.65e-07	AAEL000217	serine/threonine protein kinase [Source:VB Community Annotation]
LOC5570134	568.998	0.627492	0.109561	5.72735	1.02e-08	4.82e-07	AAEL008099	Procollagen-lysine,2-oxoglutarate 5-dioxygenase [Source:UniProtKB/TrEMBL;Acc:A0A1S4FIM3]
LOC110680257	11.8483	2.32687	0.40642	5.72529	1.03e-08	4.86e-07	AAEL027743
LOC5575847	120.682	0.871929	0.152483	5.71819	1.08e-08	5.05e-07	AAEL012126	F-box/lrr protein, drome [Source:VB Community Annotation]
LOC5580070	2206.71	-0.418882	0.0732792	-5.71626	1.09e-08	5.09e-07	AAEL002160	GTP-binding protein [Source:VB Community Annotation]
LOC110680246	129.483	-1.94774	0.340944	-5.71278	1.11e-08	5.18e-07	AAEL025603
LOC110674609	12.0833	2.29034	0.400965	5.71206	1.12e-08	5.19e-07	AAEL021980
LOC5568806	149.325	-1.58521	0.277708	-5.70822	1.14e-08	5.29e-07	AAEL001156
LOC5578222	179.665	1.07466	0.188307	5.70696	1.15e-08	5.32e-07	AAEL020104
LOC5572561	232.699	0.491586	0.0861615	5.7054	1.16e-08	5.35e-07	AAEL009894	leucine-rich immune protein (Coil-less) [Source:VB Community Annotation]	LRIM21
LOC110679213	57.9064	-1.82251	0.319663	-5.70134	1.19e-08	5.46e-07	AAEL024509
LOC110676388	7.87168	-2.85351	0.500728	-5.69872	1.21e-08	5.53e-07	AAEL019850
LOC5565594	268.735	0.586965	0.103024	5.69737	1.22e-08	5.56e-07	AAEL004866	protein farnesyltransferase beta subunit [Source:VB Community Annotation]
LOC5576130	58.7288	-2.13956	0.375614	-5.69616	1.23e-08	5.58e-07	AAEL002773
LOC110675493	14184.8	-0.441524	0.0776643	-5.68503	1.31e-08	5.93e-07	AAEL028043	60S ribosomal protein L28, putative [Source:UniProtKB/TrEMBL;Acc:Q1HRJ1]
LOC5577526	122.792	0.925599	0.162816	5.68494	1.31e-08	5.93e-07	AAEL013243
LOC5569921	591.788	-0.6537	0.115004	-5.68416	1.31e-08	5.94e-07	AAEL008021	specifically Rac-associated protein, putative [Source:VB Community Annotation]
LOC110680233	116.487	1.01679	0.178982	5.68093	1.34e-08	6.03e-07	AAEL022169
LOC5572101	34.6593	-2.33703	0.411452	-5.67995	1.35e-08	6.05e-07	AAEL009514
LOC5578840	84.6665	-1.19758	0.210946	-5.67719	1.37e-08	6.13e-07	AAEL019588
LOC110678390	6.02447	-5.02129	0.884581	-5.67646	1.38e-08	6.14e-07	AAEL020280
LOC110677914	78.0627	-2.50118	0.440903	-5.67286	1.4e-08	6.25e-07	AAEL019906
LOC5569523	68.2489	-1.65944	0.292616	-5.67106	1.42e-08	6.3e-07	AAEL007706
LOC5573851	2426.53	0.253814	0.0447738	5.66881	1.44e-08	6.37e-07	AAEL010777	thioredoxin (TRX), putative [Source:VB Community Annotation]
LOC110675339	38.6232	-1.76389	0.311379	-5.66478	1.47e-08	6.49e-07	AAEL023482
LOC5574868	119.148	-0.786794	0.138901	-5.66442	1.48e-08	6.49e-07	AAEL025645
LOC5565779	726.958	-1.55931	0.275368	-5.66264	1.49e-08	6.54e-07	AAEL004995	Caspase-activated nuclease, putative [Source:UniProtKB/TrEMBL;Acc:A0A1S4F990]
LOC110678856	422.847	-3.72856	0.658861	-5.6591	1.52e-08	6.66e-07	AAEL027968
LOC5563880	1370.37	0.661989	0.117066	5.65484	1.56e-08	6.81e-07	AAEL014198	cdp-diacylglycerol--glycerol-3-phosphate 3-phosphatidyltransferase [Source:VB Community Annotation]
LOC110675670	43.1969	-2.47304	0.438077	-5.64522	1.65e-08	7.18e-07	AAEL022937
LOC5566558	55.3903	1.9522	0.345841	5.64477	1.65e-08	7.18e-07	AAEL005482	C-Type Lectin (CTL). [Source:VB Community Annotation]	CTL18
LOC5570155	43.8461	-1.36984	0.242865	-5.64033	1.7e-08	7.35e-07	AAEL008126	GPCR Latrophilin Family [Source:VB Community Annotation]	GPRCIR
LOC5577478	24595.9	-0.394852	0.0700553	-5.63629	1.74e-08	7.5e-07	AAEL013221	60S ribosomal protein L10a [Source:VB Community Annotation]	RpL10a
LOC5570038	74.6143	-0.994292	0.176449	-5.63501	1.75e-08	7.54e-07	AAEL019858
LOC5568965	464.824	-1.50262	0.266828	-5.63142	1.79e-08	7.67e-07	AAEL007253
LOC5573382	632.309	-0.468303	0.0831644	-5.63105	1.79e-08	7.67e-07	AAEL023675
LOC5570244	37305.1	-0.388137	0.068955	-5.62885	1.81e-08	7.75e-07	AAEL008188	60S ribosomal protein L6 [Source:UniProtKB/TrEMBL;Acc:Q16ZH3]	RpL6
LOC5564556	58594.7	-0.414076	0.073608	-5.62542	1.85e-08	7.88e-07	AAEL004325	60S ribosomal protein L5 [Source:UniProtKB/Swiss-Prot;Acc:Q1HQU2]	RpL5
LOC110679428	92.6601	-1.44353	0.256781	-5.62161	1.89e-08	8.03e-07	AAEL027470
LOC5575378	22.3558	-1.6721	0.297495	-5.6206	1.9e-08	8.06e-07	AAEL018221
LOC5571789	2784.17	0.312317	0.0556076	5.61644	1.95e-08	8.23e-07	AAEL009317	rab11 [Source:VB Community Annotation]
LOC5567124	118.691	0.80148	0.14274	5.61495	1.97e-08	8.28e-07	AAEL023543
LOC110679454	43.3204	-2.28088	0.406497	-5.61105	2.01e-08	8.45e-07	AAEL024708
LOC5572295	1632	0.332168	0.0592228	5.60878	2.04e-08	8.54e-07	AAEL007800	cytidine and deoxycytidylate deaminase zinc-binding region [Source:VB Community Annotation]
LOC110676085	24.3283	-1.95566	0.34876	-5.60748	2.05e-08	8.58e-07	AAEL021765
LOC5567756	154.94	-2.46037	0.43944	-5.59888	2.16e-08	8.99e-07	AAEL000117
LOC5574999	24.8473	1.92612	0.344117	5.59728	2.18e-08	9.05e-07	AAEL002520	apolipoprotein D, putative [Source:VB Community Annotation]
LOC5571658	109.292	-1.14279	0.204403	-5.59089	2.26e-08	9.37e-07	AAEL001666
LOC5577339	100.624	-0.704169	0.126096	-5.58438	2.35e-08	9.7e-07	AAEL000429
LOC5570211	88.8146	1.57494	0.282096	5.58299	2.36e-08	9.75e-07	AAEL019828
LOC110677839	498.026	-1.52159	0.272889	-5.57585	2.46e-08	1.01e-06	AAEL026461
LOC5568291	114.389	0.724245	0.129926	5.5743	2.49e-08	1.02e-06	AAEL006748	ss-DNA binding protein 12RNP2 precursor, putative [Source:VB Community Annotation]
LOC110674861	238.497	1.69228	0.303634	5.57343	2.5e-08	1.02e-06	AAEL022681
LOC5571267	165.897	0.976141	0.175171	5.5725	2.51e-08	1.02e-06	AAEL001573
LOC110680502	238.358	1.69114	0.303538	5.57142	2.53e-08	1.03e-06	AAEL024797
LOC5563844	657.795	-1.87165	0.336196	-5.56716	2.59e-08	1.05e-06	AAEL014174
LOC5579195	197.397	-1.09307	0.196491	-5.56297	2.65e-08	1.07e-06	AAEL020488
LOC5576573	163.515	0.986832	0.177398	5.56281	2.65e-08	1.07e-06	AAEL023549
LOC5573832	20.579	-1.92804	0.347147	-5.55397	2.79e-08	1.13e-06	AAEL010749
LOC5573260	1852.49	-0.561282	0.101125	-5.55035	2.85e-08	1.15e-06	AAEL010359	ATP-dependent transporter [Source:VB Community Annotation]
LOC5570147	242.652	0.785293	0.141587	5.54636	2.92e-08	1.17e-06	AAEL008128	mitochondrial inner membrane protein translocase, 13kD-subunit, putative [Source:VB Community Annotation]
LOC5570667	90.7112	0.72216	0.13028	5.54313	2.97e-08	1.19e-06	AAEL008486	protein kinase C inhibitor, putative [Source:VB Community Annotation]
LOC110678582	12.0889	-6.91538	1.24885	-5.53739	3.07e-08	1.22e-06	AAEL025764
LOC5569747	225.085	-0.824223	0.148869	-5.53658	3.08e-08	1.22e-06	AAEL025379
LOC5571729	347.572	-0.572545	0.103414	-5.53644	3.09e-08	1.22e-06	AAEL009266	c4b-binding protein beta chain [Source:VB Community Annotation]
LOC110679713	37.7875	-2.18349	0.394567	-5.53388	3.13e-08	1.24e-06	AAEL027780
LOC5569310	986.005	0.817546	0.147838	5.53001	3.2e-08	1.26e-06	AAEL007549	phosphatidylethanolamine-binding protein [Source:VB Community Annotation]
LOC110675919	89.4958	0.779326	0.141055	5.52498	3.3e-08	1.3e-06	AAEL023494
LOC110676563	2541.16	-1.97698	0.357918	-5.52356	3.32e-08	1.3e-06	AAEL025323
LOC23687882	1811.35	-0.391794	0.070961	-5.52126	3.37e-08	1.32e-06	AAEL017462
LOC5570871	289.756	1.33451	0.241736	5.52053	3.38e-08	1.32e-06	AAEL019868
LOC5571213	197.027	-0.527689	0.0956144	-5.51893	3.41e-08	1.33e-06	AAEL008909
LOC5572238	271.392	-0.635702	0.115208	-5.51787	3.43e-08	1.33e-06	AAEL009668
LOC5564392	2875.43	0.770589	0.139766	5.51341	3.52e-08	1.37e-06	AAEL004234
LOC110676744	751.082	-1.68844	0.3063	-5.51238	3.54e-08	1.37e-06	AAEL028104
LOC5571992	124.132	-1.67179	0.304007	-5.49917	3.82e-08	1.47e-06	AAEL026330
LOC5575817	536.287	-1.29538	0.235576	-5.49877	3.82e-08	1.47e-06	AAEL012089
LOC110675800	12.9794	1.79029	0.325645	5.49767	3.85e-08	1.48e-06	AAEL022428
LOC110677663	165.757	-1.70664	0.310509	-5.49627	3.88e-08	1.49e-06	AAEL023914
LOC110680300	14.58	-1.68015	0.305895	-5.49256	3.96e-08	1.51e-06	AAEL026650
LOC5579650	1768.58	-1.84097	0.335345	-5.48978	4.02e-08	1.53e-06	AAEL003965	calpain 4, 6, 7, invertebrate [Source:VB Community Annotation]
LOC5571819	176.124	-1.62944	0.296945	-5.48734	4.08e-08	1.55e-06	AAEL001687	adenylate cyclase [Source:VB Community Annotation]
LOC5578447	59.3472	-0.842017	0.153456	-5.48703	4.09e-08	1.55e-06	AAEL018324
LOC110676233	13.2213	1.7616	0.32106	5.48682	4.09e-08	1.55e-06	AAEL024833
LOC5571046	162.04	0.823707	0.150191	5.48441	4.15e-08	1.57e-06	AAEL008783
LOC5569338	2814.45	-0.384329	0.0701081	-5.48195	4.21e-08	1.58e-06	AAEL007546	actin-related protein 2/3 complex subunit 1A [Source:VB Community Annotation]
LOC5573063	1443.66	-0.34898	0.0636684	-5.48122	4.22e-08	1.59e-06	AAEL012911	leucine-rich immune protein (Coil-less) [Source:VB Community Annotation]	LRIM18
LOC5569051	62.3142	-1.9113	0.348736	-5.48066	4.24e-08	1.59e-06	AAEL019744
LOC5578916	316.606	-1.85638	0.338849	-5.47849	4.29e-08	1.6e-06	AAEL003757	glutamate dehydrogenase [Source:VB Community Annotation]
LOC5571511	1521.13	-0.508115	0.0927474	-5.47849	4.29e-08	1.6e-06	AAEL001616	vesicular-fusion protein nsf [Source:VB Community Annotation]
LOC5579271	43.7126	-2.26632	0.413793	-5.47695	4.33e-08	1.61e-06	AAEL015638	trypsin [Source:VB Community Annotation]
LOC110674678	21.2845	-2.42311	0.442797	-5.47229	4.44e-08	1.65e-06	AAEL021672
LOC5565467	302.285	-0.803855	0.146978	-5.46924	4.52e-08	1.67e-06	AAEL004793	dipeptidyl-peptidase [Source:VB Community Annotation]
LOC5578675	860.176	-2.62673	0.481449	-5.45588	4.87e-08	1.8e-06	AAEL003618	sodium/chloride dependent amino acid transporter [Source:VB Community Annotation]
LOC5577195	63.9933	-1.34851	0.247536	-5.44774	5.1e-08	1.88e-06	AAEL013415	alpha-tropomyosin 5a, putative [Source:VB Community Annotation]
LOC5569663	405.295	-3.28253	0.603394	-5.4401	5.32e-08	1.96e-06	AAEL007807	cytochrome P450 [Source:VB Community Annotation]	CYP4D38
LOC5574331	485.563	0.752032	0.138269	5.43891	5.36e-08	1.97e-06	AAEL002331	Mannose-6-phosphate isomerase [Source:UniProtKB/TrEMBL;Acc:Q17IJ3]
LOC5567639	695.253	-1.10472	0.203161	-5.43766	5.4e-08	1.98e-06	AAEL006239	glycerol kinase [Source:VB Community Annotation]
LOC5568948	237.527	-1.43059	0.263183	-5.43574	5.46e-08	1.99e-06	AAEL007225	dynein heavy chain [Source:VB Community Annotation]
LOC5572470	10841.3	-0.357281	0.0657439	-5.43443	5.5e-08	2e-06	AAEL009825	60S ribosomal protein L13a [Source:UniProtKB/TrEMBL;Acc:Q16US7]	RpL13a
LOC110676026	147.954	-1.51455	0.278875	-5.43094	5.61e-08	2.04e-06	AAEL023651
LOC5568954	1675.76	-1.54614	0.284735	-5.43011	5.63e-08	2.04e-06	AAEL007258
LOC110675310	900.858	-2.1134	0.389285	-5.42892	5.67e-08	2.05e-06	AAEL026138
LOC5564549	98.54	0.703409	0.129858	5.41675	6.07e-08	2.19e-06	AAEL004317
LOC110678527	3.13871	-5.26422	0.972221	-5.41463	6.14e-08	2.21e-06	AAEL020209
LOC110678907	14.529	-3.0431	0.562675	-5.40827	6.36e-08	2.29e-06	AAEL026102
LOC5570224	54.4992	2.9199	0.540312	5.40409	6.51e-08	2.34e-06	AAEL023000
LOC5570011	118.097	-0.661096	0.122349	-5.40335	6.54e-08	2.34e-06	AAEL000170
LOC5571540	47.3763	1.06312	0.196866	5.40021	6.66e-08	2.38e-06	AAEL009127	cytochrome P450 [Source:VB Community Annotation]	CYP6M11
LOC5569846	380.738	-0.491498	0.0910613	-5.39744	6.76e-08	2.41e-06	AAEL018149
LOC5574970	50.5139	-0.842311	0.156132	-5.39486	6.86e-08	2.44e-06	AAEL027527
LOC5564875	98.9246	-0.825076	0.153097	-5.38924	7.08e-08	2.51e-06	AAEL004462
LOC110679199	99.7381	-1.67662	0.311498	-5.38245	7.35e-08	2.6e-06	AAEL023415
LOC5566290	261.372	-2.34422	0.436285	-5.37313	7.74e-08	2.73e-06	AAEL000725
LOC5575639	166.756	-0.836349	0.155704	-5.3714	7.81e-08	2.75e-06	AAEL026043
LOC110674675	27.5118	-1.75851	0.327639	-5.36721	8e-08	2.81e-06	AAEL024118
LOC110680828	25.529	-1.12928	0.2107	-5.35966	8.34e-08	2.92e-06	AAEL027008
LOC5568315	64.7396	1.0233	0.191165	5.35295	8.65e-08	3.03e-06	AAEL006754
LOC5572778	318.66	0.417309	0.0780847	5.34431	9.08e-08	3.17e-06	AAEL010048	26S proteasome non-ATPase regulatory subunit [Source:VB Community Annotation]
LOC110679257	2.96039	-5.17744	0.969045	-5.34283	9.15e-08	3.19e-06	AAEL026635
LOC110681296	21.5241	-2.02504	0.379231	-5.33986	9.3e-08	3.23e-06	AAEL025938
LOC5571808	1281.97	-1.36027	0.254834	-5.33788	9.4e-08	3.26e-06	AAEL001680
LOC5574425	733.077	-0.849415	0.159151	-5.33715	9.44e-08	3.27e-06	AAEL019668
LOC5579902	1529	-0.502089	0.0940998	-5.33571	9.52e-08	3.28e-06	AAEL001044	tyrosyl-tRNA synthetase [Source:VB Community Annotation]	Aats-tyr
LOC5570052	200.871	0.542143	0.101607	5.3357	9.52e-08	3.28e-06	AAEL000210	mitochondrial ribosomal protein L2 [Source:VB Community Annotation]	mRpL2
LOC110678761	207.917	-2.03901	0.382192	-5.33504	9.55e-08	3.28e-06	AAEL022747
LOC5572471	60.3595	-1.2908	0.242003	-5.33382	9.62e-08	3.3e-06	AAEL009813	glutamate receptor 7 (ampa) [Source:VB Community Annotation]
LOC110678524	9.13108	-6.5482	1.22801	-5.33235	9.69e-08	3.32e-06	AAEL028010
LOC5565753	409.895	-2.43674	0.457033	-5.33166	9.73e-08	3.32e-06	AAEL014964
LOC5567249	1184.9	-0.248218	0.0465826	-5.32857	9.9e-08	3.37e-06	AAEL000860
LOC5573239	91.018	-0.816102	0.153211	-5.32667	1e-07	3.4e-06	AAEL010332
LOC5569000	294.173	1.0448	0.196246	5.3239	1.02e-07	3.45e-06	AAEL007283	acetyl-coa synthetase [Source:VB Community Annotation]
LOC110678019	98.0924	-1.99351	0.374606	-5.3216	1.03e-07	3.48e-06	AAEL027701
LOC5572390	92.281	0.725211	0.136444	5.31507	1.07e-07	3.6e-06	AAEL009779	NBP2b protein, putative [Source:VB Community Annotation]
LOC5574752	112.64	0.651815	0.122683	5.31302	1.08e-07	3.63e-06	AAEL011390	mitochondrial ribosomal protein, L9, putative [Source:VB Community Annotation]	mRPL9
LOC5575157	135.361	-1.62285	0.305588	-5.31057	1.09e-07	3.68e-06	AAEL000382	myosin motor, putative [Source:VB Community Annotation]
LOC5576398	187.513	-0.636523	0.119974	-5.3055	1.12e-07	3.77e-06	AAEL012486
LOC110679636	48.7097	-1.40242	0.264442	-5.30334	1.14e-07	3.81e-06	AAEL024568
LOC110677892	86.377	-1.97634	0.37268	-5.30304	1.14e-07	3.81e-06	AAEL027834
LOC5568113	473.347	0.583046	0.109966	5.30205	1.15e-07	3.82e-06	AAEL006557
LOC110677938	56.7329	-1.6883	0.318612	-5.29893	1.16e-07	3.88e-06	AAEL020028
LOC5575607	209.29	-0.501714	0.0947415	-5.29561	1.19e-07	3.94e-06	AAEL011941	oxidase/peroxidase [Source:VB Community Annotation]
LOC5579227	375.141	0.495327	0.093541	5.2953	1.19e-07	3.94e-06	AAEL014064	glutaredoxin, putative [Source:VB Community Annotation]
LOC5564718	48.7224	-1.35823	0.256582	-5.29355	1.2e-07	3.97e-06	AAEL021789
LOC5568287	58.413	-1.2059	0.228121	-5.28623	1.25e-07	4.12e-06	AAEL006720
LOC110675326	96.1458	-2.18129	0.412678	-5.2857	1.25e-07	4.12e-06	AAEL020165
LOC5564092	341.764	-1.73332	0.328032	-5.28399	1.26e-07	4.15e-06	AAEL022882
LOC5574385	196.196	0.876653	0.165953	5.28255	1.27e-07	4.18e-06	AAEL011090	complement component [Source:VB Community Annotation]
LOC5572922	80.1795	0.786042	0.148815	5.282	1.28e-07	4.18e-06	AAEL010141
LOC5577385	181.14	0.584712	0.110808	5.27678	1.31e-07	4.29e-06	AAEL000467	mitochondrial ribosomal protein, L49, putative [Source:VB Community Annotation]	mRpL49
LOC110680382	15.2795	-1.97391	0.374112	-5.27625	1.32e-07	4.3e-06	AAEL025956
LOC5576621	182.937	-1.60711	0.304654	-5.2752	1.33e-07	4.31e-06	AAEL012645
LOC5573960	185.953	-0.752134	0.142682	-5.27142	1.35e-07	4.39e-06	AAEL002209
LOC5571270	20.7828	-4.59308	0.871748	-5.26882	1.37e-07	4.45e-06	AAEL021788
LOC110674687	32.4099	-1.98358	0.376517	-5.26823	1.38e-07	4.45e-06	AAEL003257
LOC5580161	285.122	0.498332	0.0946958	5.26245	1.42e-07	4.58e-06	AAEL011391	mitochondrial ribosomal protein, S9, putative [Source:VB Community Annotation]	mRpS9
LOC110677785	35.7106	2.91973	0.555329	5.25766	1.46e-07	4.69e-06	AAEL008173
LOC5575624	174.067	-0.825414	0.157026	-5.25654	1.47e-07	4.71e-06	AAEL019646
LOC5578801	1287.47	0.320533	0.0609974	5.25485	1.48e-07	4.75e-06	AAEL003646
LOC5564396	115.805	-0.930076	0.177095	-5.25185	1.51e-07	4.82e-06	AAEL004244
LOC5573765	8.93487	-2.42755	0.462294	-5.25109	1.51e-07	4.83e-06	AAEL000266	GPCR Orphan/Putative Class A Family [Source:VB Community Annotation]	GPRNNA21
LOC5564580	418.076	-1.38335	0.263501	-5.24988	1.52e-07	4.85e-06	AAEL024425
LOC110675647	123.8	-2.28866	0.436112	-5.24786	1.54e-07	4.89e-06	AAEL027476
LOC5570939	147.96	-1.05073	0.200249	-5.24711	1.55e-07	4.9e-06	AAEL008664
LOC110675359	32.9108	1.57518	0.300225	5.24667	1.55e-07	4.9e-06	AAEL020424
LOC23687733	103.752	-0.843498	0.160951	-5.24072	1.6e-07	5.05e-06	AAEL019608	G-protein coupled receptor [Source:UniProtKB/TrEMBL;Acc:A0A411JKB1]
LOC110679477	165.734	-5.54932	1.05913	-5.2395	1.61e-07	5.08e-06	AAEL023997
LOC5567341	484.591	0.882584	0.168634	5.23374	1.66e-07	5.23e-06	AAEL006011
LOC110678174	172.471	-1.58983	0.303863	-5.23205	1.68e-07	5.26e-06	AAEL027171
LOC5579020	371.204	-0.368114	0.0703683	-5.23124	1.68e-07	5.27e-06	AAEL013959
LOC5568748	222.069	-0.436859	0.0835126	-5.23105	1.69e-07	5.27e-06	AAEL007084	Methyltransferase-like protein [Source:UniProtKB/TrEMBL;Acc:A0A1S4FFL5]
LOC5574257	922.844	-0.515312	0.098548	-5.22905	1.7e-07	5.32e-06	AAEL011023
LOC110675376	40.1909	-1.07013	0.204687	-5.22813	1.71e-07	5.33e-06	AAEL024628
LOC5573423	977.493	-3.05528	0.584477	-5.22737	1.72e-07	5.35e-06	AAEL026706
LOC5577303	92.3941	0.908189	0.17386	5.22369	1.75e-07	5.44e-06	AAEL013150	Methionine aminopeptidase [Source:UniProtKB/TrEMBL;Acc:Q16K07]
LOC110678298	31.4479	-3.08587	0.591082	-5.22071	1.78e-07	5.52e-06	AAEL026698
LOC5568730	164.796	-2.14279	0.410463	-5.22042	1.79e-07	5.52e-06	AAEL007088	ribitol kinase [Source:VB Community Annotation]
LOC5571800	47.2275	-0.871094	0.167529	-5.19966	2e-07	6.16e-06	AAEL009327
LOC5566055	167.567	0.616444	0.118565	5.19923	2e-07	6.16e-06	AAEL005150	mitochondrial ribosomal protein, L23, putative [Source:VB Community Annotation]	mRpL23
LOC5578232	333.604	-0.64223	0.123543	-5.19845	2.01e-07	6.16e-06	AAEL019705
LOC110674442	110.956	-2.0077	0.386226	-5.19826	2.01e-07	6.16e-06	AAEL027517
LOC110674690	286.627	-1.82891	0.351835	-5.19822	2.01e-07	6.16e-06	AAEL024377
LOC5579655	22.0179	-1.33275	0.25642	-5.19753	2.02e-07	6.17e-06	AAEL003956	amino acid transporter [Source:VB Community Annotation]
LOC5577244	210.725	0.662016	0.127379	5.1972	2.02e-07	6.17e-06	AAEL003142
LOC5575166	303.026	-0.494199	0.0951469	-5.19406	2.06e-07	6.26e-06	AAEL000315	pigeon protein (linotte protein) [Source:VB Community Annotation]
LOC110677897	859.406	-0.780227	0.150274	-5.19202	2.08e-07	6.32e-06	AAEL025502
LOC5572069	28.3683	-1.1923	0.22968	-5.19114	2.09e-07	6.34e-06	AAEL027566
LOC5578212	31.5267	-1.17032	0.225935	-5.17989	2.22e-07	6.72e-06	AAEL003479
LOC5567163	26417.1	-0.361279	0.0697658	-5.17845	2.24e-07	6.75e-06	AAEL005901	40S ribosomal protein S3a [Source:UniProtKB/Swiss-Prot;Acc:Q1HRR3]	RpS3a
LOC110675357	3.44038	-4.89264	0.944852	-5.17821	2.24e-07	6.75e-06	AAEL024970
LOC110675802	37.4917	1.1592	0.223942	5.17635	2.26e-07	6.81e-06	AAEL023633
LOC5564247	441.085	-0.461278	0.0891543	-5.17393	2.29e-07	6.88e-06	AAEL004196	galectin [Source:VB Community Annotation]	GALE3
LOC5571928	264.533	0.62497	0.120825	5.17253	2.31e-07	6.92e-06	AAEL009413
LOC5568305	630.159	-0.920624	0.178068	-5.17006	2.34e-07	7e-06	AAEL006723
LOC5565992	187.328	0.869566	0.168271	5.16764	2.37e-07	7.08e-06	AAEL015038	palmitoyl-protein thioesterase [Source:VB Community Annotation]
LOC5565212	249.565	-0.534698	0.103517	-5.16533	2.4e-07	7.15e-06	AAEL004678	rhomboid [Source:VB Community Annotation]
LOC5571896	465.192	-0.612495	0.118658	-5.16185	2.45e-07	7.27e-06	AAEL009372
LOC110676377	21.6499	1.43908	0.279131	5.15558	2.53e-07	7.5e-06	AAEL027766
LOC5578298	223.075	-0.524607	0.101758	-5.15542	2.53e-07	7.5e-06	AAEL013617	chimerin (rho- GTPase-activating protein) [Source:VB Community Annotation]
LOC5565755	519.692	-0.595946	0.115617	-5.15451	2.54e-07	7.52e-06	AAEL004978	DEAD box ATP-dependent RNA helicase [Source:VB Community Annotation]
LOC23687785	104.176	-0.654343	0.127071	-5.14941	2.61e-07	7.71e-06	AAEL021495
LOC5568755	37.1288	1.75303	0.340853	5.14308	2.7e-07	7.96e-06	AAEL007103	leucine-rich immune protein (TM) [Source:VB Community Annotation]	LRIM15
LOC110677776	120.92	-4.54423	0.884406	-5.13817	2.77e-07	8.16e-06	AAEL023599
LOC110675463	50.2001	-2.06599	0.40228	-5.13571	2.81e-07	8.25e-06	AAEL017998
LOC5579807	160.662	0.786479	0.153252	5.13194	2.87e-07	8.4e-06	AAEL003954	juvenile hormone-inducible protein, putative [Source:VB Community Annotation]
LOC5571199	130.142	-0.730571	0.142378	-5.1312	2.88e-07	8.41e-06	AAEL018166
LOC5576659	93.042	-0.809449	0.157756	-5.131	2.88e-07	8.41e-06	AAEL012689	Glucose-methanol-choline (gmc) oxidoreductase [Source:UniProtKB/TrEMBL;Acc:A0A1S4FWX8]
LOC110679086	10.5318	1.84325	0.359316	5.12988	2.9e-07	8.42e-06	AAEL023184
LOC5570317	107.107	-0.944672	0.184153	-5.12983	2.9e-07	8.42e-06	AAEL008247	DNA polymerase alpha catalytic subunit [Source:VB Community Annotation]
LOC5566117	50.8198	1.87959	0.366407	5.12979	2.9e-07	8.42e-06	AAEL021180
LOC5568614	109.98	1.48589	0.289685	5.12933	2.91e-07	8.42e-06	AAEL006982	lipase [Source:VB Community Annotation]
LOC5577024	273.321	-0.768162	0.149832	-5.12683	2.95e-07	8.5e-06	AAEL025729
LOC23687759	147.754	-0.92146	0.179738	-5.12668	2.95e-07	8.5e-06	AAEL022698
LOC5572889	149.059	0.639236	0.124688	5.12667	2.95e-07	8.5e-06	AAEL010112
LOC110674356	7.78292	-2.87285	0.560605	-5.12456	2.98e-07	8.58e-06	AAEL024537
LOC5564751	12.1579	1.93982	0.379035	5.11777	3.09e-07	8.87e-06	AAEL014617	cytochrome P450 [Source:VB Community Annotation]	CYP9J28
LOC5578234	1956.9	0.484519	0.0946954	5.11661	3.11e-07	8.91e-06	AAEL013571	synaptobrevin [Source:VB Community Annotation]
LOC23687512	7.18079	-4.35664	0.852109	-5.11278	3.17e-07	9.08e-06	AAEL022605
LOC5569262	511.859	-3.28189	0.642573	-5.10742	3.27e-07	9.32e-06	AAEL007508	oviductin [Source:VB Community Annotation]
LOC5570908	151.868	-0.969176	0.189785	-5.10669	3.28e-07	9.34e-06	AAEL001483
LOC5578370	302.718	-0.471878	0.0924321	-5.10513	3.31e-07	9.4e-06	AAEL003536	E3 UFM1-protein ligase 1 homolog (EC 6.3.2.-) [Source:VB Community Annotation]
LOC5564146	572.382	0.426436	0.0835602	5.10334	3.34e-07	9.47e-06	AAEL014325	proteasome regulatory subunits [Source:VB Community Annotation]
LOC5574085	610.171	-0.297918	0.058452	-5.0968	3.45e-07	9.79e-06	AAEL002260	Putative gryzun [Source:UniProtKB/TrEMBL;Acc:A0A0P6IV21]
LOC110675640	82.1436	-1.53621	0.301572	-5.09403	3.51e-07	9.92e-06	AAEL020742
LOC110676200	33.8808	-1.53416	0.301343	-5.09109	3.56e-07	1.01e-05	AAEL024240
LOC110675834	9.48296	2.13791	0.420048	5.08968	3.59e-07	1.01e-05	AAEL020052
LOC110676805	9.48296	2.13791	0.420048	5.08968	3.59e-07	1.01e-05	AAEL026561
LOC5572472	449.006	-0.42925	0.0843735	-5.0875	3.63e-07	1.02e-05	AAEL009818
LOC110677165	15.7955	-2.16792	0.426468	-5.08341	3.71e-07	1.04e-05	AAEL026376
LOC110676304	203.365	0.811985	0.159853	5.07956	3.78e-07	1.06e-05	AAEL013495
LOC5567138	177.724	-0.646743	0.127515	-5.07189	3.94e-07	1.1e-05	AAEL019757
LOC110674506	13.5525	2.15031	0.423998	5.07151	3.95e-07	1.1e-05	AAEL024705
LOC5571316	323.851	-0.759714	0.14982	-5.07086	3.96e-07	1.1e-05	AAEL008940	chaoptin [Source:VB Community Annotation]
LOC5576989	54.3084	-0.979539	0.193274	-5.06813	4.02e-07	1.12e-05	AAEL003088
LOC110676999	50.3016	-1.6621	0.328466	-5.0602	4.19e-07	1.16e-05	AAEL020419
LOC110676508	8.87539	-2.61772	0.517642	-5.05701	4.26e-07	1.18e-05	AAEL024496
LOC5576758	19360.1	-0.391455	0.0774585	-5.05374	4.33e-07	1.2e-05	AAEL025553
LOC5572773	149.533	-0.761743	0.150763	-5.05258	4.36e-07	1.2e-05	AAEL010041
LOC5573583	1163.36	0.96448	0.191077	5.04759	4.47e-07	1.23e-05	AAEL002130	ecdysone inducible protein L2, putative [Source:VB Community Annotation]
LOC110675616	122.783	-0.771063	0.152791	-5.04654	4.5e-07	1.24e-05	AAEL023898
LOC5572198	1129.6	-1.04939	0.208001	-5.04512	4.53e-07	1.24e-05	AAEL009615	ultraviolet wavelength sensitive opsin [Source:VB Community Annotation]	GPROP8
LOC5575561	125.694	-1.94716	0.386091	-5.04328	4.58e-07	1.25e-05	AAEL002657
LOC5579971	186.33	-0.901655	0.178795	-5.04295	4.58e-07	1.25e-05	AAEL026089
LOC110679182	37.1952	1.09051	0.216252	5.04278	4.59e-07	1.25e-05	AAEL020361
LOC5573058	79.1146	1.22823	0.243565	5.04271	4.59e-07	1.25e-05	AAEL010247
LOC5578034	18.7013	-1.54445	0.306316	-5.04201	4.61e-07	1.25e-05	AAEL013473	cAMP-specific 3,5-cyclic phosphodiesterase [Source:VB Community Annotation]
LOC5571269	8.32527	-2.81813	0.559675	-5.0353	4.77e-07	1.3e-05	AAEL001571
LOC5578183	502.685	-0.673235	0.133741	-5.03385	4.81e-07	1.3e-05	AAEL024112
LOC110675484	135.102	-2.12371	0.42194	-5.03322	4.82e-07	1.31e-05	AAEL021568
LOC110675288	144.099	0.723966	0.14397	5.02858	4.94e-07	1.34e-05	AAEL023028	Density-regulated protein [Source:UniProtKB/TrEMBL;Acc:A0A0P6IY07]
LOC5575418	31.9384	-1.83751	0.365563	-5.02651	4.99e-07	1.35e-05	AAEL026731
LOC5575797	121.656	0.646644	0.128648	5.02646	5e-07	1.35e-05	AAEL012074	Putative mitochondrial/ ribosomal protein [Source:UniProtKB/TrEMBL;Acc:A0A0N8ES33]
LOC5578763	163.172	0.593172	0.118037	5.02531	5.03e-07	1.35e-05	AAEL003704	39S ribosomal protein L13, mitochondrial [Source:UniProtKB/TrEMBL;Acc:Q17ET7]	mRpL13
LOC5575910	1205.14	-1.31038	0.260826	-5.02396	5.06e-07	1.36e-05	AAEL012154	2,3-cyclic-nucleotide 2-phosphodiesterase [Source:VB Community Annotation]
LOC5568456	511.518	0.742168	0.147951	5.01631	5.27e-07	1.41e-05	AAEL006867
LOC5567241	604.82	-0.36535	0.0728473	-5.01529	5.3e-07	1.42e-05	AAEL000857
LOC110677855	28.7003	-1.77625	0.354281	-5.01367	5.34e-07	1.43e-05	AAEL022436
LOC5566608	2025.83	0.422628	0.0843075	5.01293	5.36e-07	1.43e-05	AAEL000791
LOC5569275	229.305	1.01711	0.20294	5.01187	5.39e-07	1.43e-05	AAEL007531
LOC5569637	254.101	1.03202	0.205915	5.01185	5.39e-07	1.43e-05	AAEL007778	leucine-rich transmembrane protein [Source:VB Community Annotation]
LOC5576003	231.457	0.571162	0.113967	5.01165	5.4e-07	1.43e-05	AAEL025078
LOC5570587	198.25	0.630367	0.125798	5.01095	5.42e-07	1.43e-05	AAEL008397	Glutathione peroxidase [Source:UniProtKB/TrEMBL;Acc:Q5K6H6]	GPXH2
LOC110678198	2044.55	-0.398227	0.0795082	-5.00863	5.48e-07	1.45e-05	AAEL028178
LOC5579977	114.8	0.717902	0.143449	5.00457	5.6e-07	1.48e-05	AAEL007738	app binding protein [Source:VB Community Annotation]
LOC110675631	52.382	-1.67047	0.333987	-5.00161	5.69e-07	1.5e-05	AAEL022730
LOC5571676	55.9265	-1.32779	0.26563	-4.99863	5.77e-07	1.52e-05	AAEL001658	sodium-dependent phosphate transporter [Source:VB Community Annotation]
LOC110679309	15.7447	-4.28201	0.857181	-4.99545	5.87e-07	1.54e-05	AAEL023129
LOC5578260	129.075	0.715154	0.143209	4.99377	5.92e-07	1.55e-05	AAEL014880
LOC5568897	999.096	-1.2482	0.250112	-4.99054	6.02e-07	1.58e-05	AAEL026878
LOC5567248	102.838	-1.62962	0.3269	-4.98506	6.19e-07	1.62e-05	AAEL024189
LOC110674085	18.1231	-1.84267	0.369774	-4.98325	6.25e-07	1.63e-05	AAEL021443
LOC5573934	117.654	-0.73702	0.148117	-4.97593	6.49e-07	1.69e-05	AAEL002186
LOC110677229	38.0302	-0.995811	0.200251	-4.97282	6.6e-07	1.71e-05	AAEL022094
LOC110677175	666.074	-0.717005	0.144239	-4.97094	6.66e-07	1.73e-05	AAEL021359
LOC5567339	182.196	-0.672387	0.135283	-4.97024	6.69e-07	1.73e-05	AAEL006012	factor for adipocyte differentiation [Source:VB Community Annotation]
LOC5575238	1871.75	-0.630557	0.126867	-4.97021	6.69e-07	1.73e-05	AAEL011708	heat shock protein [Source:VB Community Annotation]
LOC110674066	609.521	-3.93128	0.790981	-4.97013	6.69e-07	1.73e-05	AAEL024630
LOC5570943	4.86834	-4.50652	0.906905	-4.96911	6.73e-07	1.73e-05	AAEL008681	C-Type Lectin (CTL). [Source:VB Community Annotation]	CTL12
LOC5568064	38.3667	-1.2147	0.244663	-4.96479	6.88e-07	1.77e-05	AAEL019807
LOC23687526	135.756	-0.771466	0.155422	-4.9637	6.92e-07	1.78e-05	AAEL021570
LOC5566847	10789.2	-0.240015	0.0483635	-4.96273	6.95e-07	1.78e-05	AAEL000795	ubiquitin [Source:VB Community Annotation]
LOC5575783	130.223	-0.577794	0.116479	-4.96052	7.03e-07	1.8e-05	AAEL019805
LOC110677747	2.5653	-4.96488	1.00151	-4.95737	7.15e-07	1.82e-05	AAEL025691
LOC110678779	2.5653	-4.96488	1.00151	-4.95737	7.15e-07	1.82e-05	AAEL023520
LOC5575974	106.779	-0.606551	0.122366	-4.95687	7.16e-07	1.83e-05	AAEL012229
LOC5564226	10796.2	-0.356141	0.0718596	-4.95606	7.19e-07	1.83e-05	AAEL004175	40S ribosomal protein S17 [Source:UniProtKB/TrEMBL;Acc:Q52UT2]	RpS17
LOC110680475	4577.99	-0.355489	0.0717401	-4.95523	7.22e-07	1.83e-05	AAEL020447	40S ribosomal protein S20 [Source:UniProtKB/TrEMBL;Acc:Q1HRS9]
LOC5572088	4577.99	-0.355489	0.0717401	-4.95523	7.22e-07	1.83e-05	AAEL009506	40S ribosomal protein S20 [Source:UniProtKB/TrEMBL;Acc:Q1HRS9]	RpS20
LOC5577899	2616.89	-0.460325	0.092909	-4.95458	7.25e-07	1.84e-05	AAEL019883
LOC5577227	483.059	0.502387	0.101447	4.95221	7.34e-07	1.85e-05	AAEL003130	bcr-associated protein, bap [Source:VB Community Annotation]
LOC5577628	35.9847	-2.16237	0.436761	-4.95093	7.39e-07	1.86e-05	AAEL003217	dynein light chain [Source:VB Community Annotation]
LOC5574913	199.845	-0.509424	0.102921	-4.94966	7.43e-07	1.87e-05	AAEL022370
LOC110681504	574.535	0.730809	0.147684	4.94845	7.48e-07	1.88e-05	AAEL020472
LOC5567330	403.422	-1.45151	0.293384	-4.94747	7.52e-07	1.89e-05	AAEL006753
LOC110678190	22.9494	-1.32669	0.268567	-4.93987	7.82e-07	1.96e-05	AAEL023588
LOC110674344	87.534	-1.97699	0.400265	-4.9392	7.84e-07	1.96e-05	AAEL025958
LOC5567459	100.193	-0.703604	0.142462	-4.93888	7.86e-07	1.96e-05	AAEL000962	Bardet-Biedl syndrome 7 protein homolog [Source:UniProtKB/TrEMBL;Acc:Q17MR4]
LOC5579045	248.996	0.541918	0.109752	4.93767	7.91e-07	1.97e-05	AAEL013980	glutaredoxin, putative [Source:VB Community Annotation]
LOC110679177	388.682	0.523225	0.106014	4.93541	8e-07	1.99e-05	AAEL025122
LOC5567896	77.7361	-3.6043	0.730406	-4.93465	8.03e-07	2e-05	AAEL006354	epoxide hydrolase [Source:VB Community Annotation]
LOC5575435	195.715	0.530895	0.10759	4.93443	8.04e-07	2e-05	AAEL002644
LOC5576108	140.363	-1.53063	0.310213	-4.93413	8.05e-07	2e-05	AAEL002800	DNA polymerase epsilon, catalytic subunit [Source:VB Community Annotation]
LOC5568246	3545.92	-0.39125	0.0793041	-4.93354	8.08e-07	2e-05	AAEL006685	G-protein, gamma-subunit, putative [Source:VB Community Annotation]
LOC110680932	149.281	-0.573207	0.116236	-4.93139	8.16e-07	2.01e-05	AAEL024962
LOC5567169	71.968	-1.95833	0.397141	-4.93106	8.18e-07	2.01e-05	AAEL005907
LOC110676981	193.401	-0.515559	0.104559	-4.93079	8.19e-07	2.01e-05	AAEL020186
LOC5566123	1483.04	0.469828	0.0952848	4.93077	8.19e-07	2.01e-05	AAEL005187	laminin gamma 1 chain [Source:VB Community Annotation]
LOC5566516	103.851	-0.762985	0.154775	-4.92963	8.24e-07	2.02e-05	AAEL019553
LOC110679022	1093.5	-0.640318	0.129917	-4.92867	8.28e-07	2.03e-05	AAEL027644
LOC5574830	93.4589	-1.85942	0.377399	-4.92693	8.35e-07	2.05e-05	AAEL011439	paramyosin, putative [Source:VB Community Annotation]
LOC5568306	48.3908	0.780466	0.158534	4.92302	8.52e-07	2.08e-05	AAEL006755
LOC5580158	919.029	-0.568483	0.115496	-4.92211	8.56e-07	2.09e-05	AAEL019509
LOC5569279	217.542	-0.724907	0.147313	-4.92087	8.62e-07	2.1e-05	AAEL007521	importin beta-2 [Source:VB Community Annotation]
LOC5575153	287.496	-3.07359	0.624974	-4.91796	8.75e-07	2.13e-05	AAEL000329
LOC110673987	62.7078	1.06813	0.21746	4.91184	9.02e-07	2.19e-05	AAEL027089	Endoplasmic reticulum resident protein 29 [Source:UniProtKB/TrEMBL;Acc:Q16HE7]
LOC5564321	72.8443	0.953579	0.194165	4.91117	9.05e-07	2.2e-05	AAEL000575	apyrase, putative [Source:VB Community Annotation]
LOC5570735	828.834	0.617769	0.125815	4.91014	9.1e-07	2.2e-05	AAEL008517	elongation factor tu (ef-tu) [Source:VB Community Annotation]
LOC23687491	48.263	1.0704	0.218011	4.90985	9.11e-07	2.2e-05	AAEL017071	Carboxylic ester hydrolase [Source:UniProtKB/TrEMBL;Acc:A0A1S4G5Q9]
LOC5565069	122.693	-1.35433	0.27584	-4.90983	9.12e-07	2.2e-05	AAEL004572
LOC5571079	211.415	0.64972	0.132379	4.90801	9.2e-07	2.22e-05	AAEL008800	mitochondrial ribosomal protein, S26, putative [Source:VB Community Annotation]	mRpS26
LOC5580047	68.428	-1.68502	0.343554	-4.90468	9.36e-07	2.25e-05	AAEL010232
LOC5577107	350.565	0.325383	0.0663447	4.90443	9.37e-07	2.25e-05	AAEL013002	cdk9 [Source:VB Community Annotation]
LOC5569196	428.007	-1.24256	0.253843	-4.89499	9.83e-07	2.36e-05	AAEL023625
LOC110674755	29.6059	1.13921	0.23296	4.89016	1.01e-06	2.41e-05	AAEL027428
LOC5572282	318.116	-0.363886	0.0744127	-4.8901	1.01e-06	2.41e-05	AAEL001782	GPCR Orphan/Putative Class D Family [Source:VB Community Annotation]	GPRNND2
LOC5568244	140.378	-0.6635	0.135767	-4.88706	1.02e-06	2.44e-05	AAEL022611
LOC110678767	87.8727	-2.03166	0.41574	-4.88685	1.02e-06	2.44e-05	AAEL024376
LOC5566254	398.219	-0.605959	0.12411	-4.88243	1.05e-06	2.5e-05	AAEL005285
LOC5576177	22.967	-1.45475	0.297975	-4.88211	1.05e-06	2.5e-05	AAEL019810
LOC5574491	692.552	-0.532026	0.108984	-4.88168	1.05e-06	2.5e-05	AAEL023701
LOC110675850	40.7604	-1.94059	0.397552	-4.88135	1.05e-06	2.5e-05	AAEL025739
LOC5578110	144.422	-0.692014	0.14185	-4.8785	1.07e-06	2.53e-05	AAEL020003
LOC5571085	126.641	-2.3577	0.483643	-4.87487	1.09e-06	2.57e-05	AAEL008820
LOC5578361	424.849	-1.70766	0.350438	-4.87293	1.1e-06	2.6e-05	AAEL003550	aquaporin [Source:VB Community Annotation]
LOC5572487	113.15	-0.839939	0.172534	-4.86825	1.13e-06	2.65e-05	AAEL009821
LOC110675726	381.08	-3.65961	0.75177	-4.86799	1.13e-06	2.65e-05	AAEL025917
LOC5577399	158.963	-0.503558	0.103535	-4.86367	1.15e-06	2.71e-05	AAEL025042
LOC5580322	73.9989	-0.752828	0.15485	-4.86165	1.16e-06	2.73e-05	AAEL019989
LOC5570924	809.716	0.371123	0.076381	4.85884	1.18e-06	2.77e-05	AAEL026751
LOC5578809	222.338	-0.678521	0.139677	-4.85777	1.19e-06	2.77e-05	AAEL013847	diacylglycerol kinase, zeta, iota [Source:VB Community Annotation]
LOC110680390	349.204	-1.78439	0.36734	-4.8576	1.19e-06	2.77e-05	AAEL027762
LOC5580205	243.091	-0.559677	0.115222	-4.85738	1.19e-06	2.77e-05	AAEL002547	dipeptidase [Source:VB Community Annotation]
LOC5564120	145.938	-0.905477	0.186423	-4.85712	1.19e-06	2.77e-05	AAEL019570
LOC5573114	51.8623	-0.85391	0.175886	-4.8549	1.2e-06	2.8e-05	AAEL019889
LOC5577034	15129.3	-0.32158	0.0662437	-4.85451	1.21e-06	2.8e-05	AAEL012944	60S ribosomal protein L11 [Source:UniProtKB/TrEMBL;Acc:Q16KL2]	RpL11
LOC5574762	68.3389	-0.817803	0.168595	-4.85071	1.23e-06	2.85e-05	AAEL011405
LOC110674801	117.316	-0.5428	0.111914	-4.85013	1.23e-06	2.86e-05	AAEL022060
LOC5567347	773.771	-1.75065	0.361241	-4.84619	1.26e-06	2.91e-05	AAEL006017
LOC110677277	36.3777	1.02952	0.212443	4.84609	1.26e-06	2.91e-05	AAEL020842
LOC5573003	59.4406	-0.92776	0.191587	-4.8425	1.28e-06	2.95e-05	AAEL001922
LOC5574077	5.98997	-3.33055	0.688172	-4.83971	1.3e-06	2.99e-05	AAEL021209
LOC5571044	1188.71	0.496861	0.102674	4.83923	1.3e-06	3e-05	AAEL008773	laminin A chain, putative [Source:VB Community Annotation]
LOC5573842	117.024	-0.876886	0.181255	-4.83786	1.31e-06	3.01e-05	AAEL021227
LOC5566699	412.725	-0.598313	0.123678	-4.83767	1.31e-06	3.01e-05	AAEL019458
LOC5579517	145.671	-0.870137	0.179953	-4.83534	1.33e-06	3.04e-05	AAEL014993
LOC5566631	488.787	1.86121	0.384936	4.83511	1.33e-06	3.04e-05	AAEL021888
LOC5576987	154.034	-0.649551	0.134407	-4.83272	1.35e-06	3.07e-05	AAEL003065
LOC23687462	273.64	0.6275	0.129879	4.83142	1.36e-06	3.09e-05	AAEL017042
LOC5564745	330.157	-0.767334	0.158952	-4.82746	1.38e-06	3.15e-05	AAEL014600	4-hydroxyphenylpyruvate dioxygenase [Source:VB Community Annotation]
LOC5569654	805.508	-2.73614	0.566844	-4.82697	1.39e-06	3.15e-05	AAEL026602
LOC5565544	31545.9	-0.58636	0.121568	-4.8233	1.41e-06	3.2e-05	AAEL004855	ADP,ATP carrier protein [Source:VB Community Annotation]
LOC110677764	23660.5	-0.286537	0.0594101	-4.82304	1.41e-06	3.2e-05	AAEL024434	60S ribosomal protein L13a (Fragment) [Source:UniProtKB/TrEMBL;Acc:Q1HR63]
LOC5577501	177.183	-0.753334	0.156206	-4.82271	1.42e-06	3.2e-05	AAEL022637
LOC5574351	285.571	-2.07319	0.430345	-4.81751	1.45e-06	3.28e-05	AAEL002361
LOC5574016	48.1828	-0.891788	0.185149	-4.81659	1.46e-06	3.29e-05	AAEL010851	Synaptotagmin-12 [Source:UniProtKB/TrEMBL;Acc:A0A1S4FS00]
LOC110675150	2084.28	0.294244	0.0611061	4.81529	1.47e-06	3.31e-05	AAEL020753
LOC110677018	2.45926	-4.89797	1.01726	-4.81485	1.47e-06	3.31e-05	AAEL026372
LOC5573015	2854.41	0.239077	0.0496612	4.81416	1.48e-06	3.32e-05	AAEL001916	eukaryotic translation initiation factor 4e [Source:VB Community Annotation]
LOC5576655	39.3465	0.944517	0.196277	4.81217	1.49e-06	3.34e-05	AAEL012679	juvenile hormone-inducible protein, putative [Source:VB Community Annotation]
LOC5578805	346.983	-2.14394	0.445537	-4.81204	1.49e-06	3.34e-05	AAEL013846
LOC5566756	173.878	-0.524696	0.109077	-4.81032	1.51e-06	3.37e-05	AAEL005619	defective proboscis extension response, putative [Source:VB Community Annotation]
LOC5579208	108.297	-0.967462	0.201167	-4.80924	1.52e-06	3.38e-05	AAEL014046	sex-determining protein fem-1 [Source:VB Community Annotation]
LOC110677198	118.359	-1.19835	0.24931	-4.80665	1.53e-06	3.42e-05	AAEL023713
LOC5571002	569.847	-0.462573	0.0962529	-4.80581	1.54e-06	3.43e-05	AAEL019511
LOC5567619	71.3087	-0.74264	0.154765	-4.7985	1.6e-06	3.55e-05	AAEL006214
LOC110675294	253.779	-0.996779	0.207747	-4.79804	1.6e-06	3.56e-05	AAEL011492
LOC110681033	545.111	0.442337	0.0922043	4.79736	1.61e-06	3.56e-05	AAEL027639
LOC110676497	42.6894	-1.69756	0.353883	-4.79694	1.61e-06	3.57e-05	AAEL024886
LOC5572539	626.759	-3.29169	0.68627	-4.7965	1.61e-06	3.57e-05	AAEL022139
LOC5571616	63.705	-2.64997	0.552953	-4.7924	1.65e-06	3.64e-05	AAEL009194
LOC5576455	124.162	1.36899	0.285709	4.79156	1.65e-06	3.65e-05	AAEL012538	leucine-rich immune protein (Short) [Source:VB Community Annotation]	LRIM6
LOC5578596	1989.18	0.483665	0.100985	4.78949	1.67e-06	3.68e-05	AAEL013778	F-actin capping protein alpha [Source:VB Community Annotation]
LOC5569245	864.313	-0.686633	0.143394	-4.78843	1.68e-06	3.69e-05	AAEL023829
LOC110676763	84.8636	-1.97979	0.413726	-4.78526	1.71e-06	3.74e-05	AAEL022642
LOC5575076	607.139	-1.6428	0.343318	-4.78508	1.71e-06	3.74e-05	AAEL011638	Cyclic-nucleotide-gated cation channel [Source:UniProtKB/TrEMBL;Acc:A0A1S4FU57]
LOC5574139	234.129	-0.474422	0.0991476	-4.78501	1.71e-06	3.74e-05	AAEL010954
LOC5569610	37.0128	1.84311	0.385293	4.78365	1.72e-06	3.76e-05	AAEL001256
LOC5578730	219.029	-0.479909	0.100424	-4.77883	1.76e-06	3.84e-05	AAEL013839
LOC5567155	62.6455	0.719164	0.150492	4.77876	1.76e-06	3.84e-05	AAEL005909	splicing factor SC35, putative [Source:VB Community Annotation]
LOC5567469	703.326	-0.29976	0.0627623	-4.77611	1.79e-06	3.89e-05	AAEL000950
LOC5566409	20.2657	-1.10612	0.231673	-4.7745	1.8e-06	3.92e-05	AAEL019706
LOC5576782	1764.76	-3.04805	0.638479	-4.77392	1.81e-06	3.92e-05	AAEL012762	cytochrome P450 [Source:VB Community Annotation]	CYP325N2
LOC5564224	77.3752	-1.36045	0.285171	-4.77066	1.84e-06	3.98e-05	AAEL004171
LOC110674644	62.6044	-1.41394	0.296574	-4.76759	1.86e-06	4.04e-05	AAEL026885
LOC5574590	354.005	0.641998	0.134718	4.76549	1.88e-06	4.06e-05	AAEL002416	short-chain dehydrogenase [Source:VB Community Annotation]
LOC5567609	37.9451	-1.22854	0.2578	-4.76548	1.88e-06	4.06e-05	AAEL019752
LOC5565883	269.114	-0.839823	0.176234	-4.76537	1.89e-06	4.06e-05	AAEL019474
LOC5572453	170.964	-2.77533	0.582442	-4.76499	1.89e-06	4.07e-05	AAEL001813	sodium/solute symporter [Source:VB Community Annotation]
LOC5568278	153.516	0.7765	0.162984	4.76426	1.9e-06	4.07e-05	AAEL025796
LOC5574689	509.609	-0.353168	0.0741624	-4.76209	1.92e-06	4.11e-05	AAEL011328	zinc finger protein [Source:VB Community Annotation]
LOC5566784	603.947	-0.335755	0.0705222	-4.76098	1.93e-06	4.13e-05	AAEL015255	phosphatidylinositol-4-phosphate 5-kinase type i [Source:VB Community Annotation]
LOC5575040	663.11	-1.4165	0.297693	-4.75826	1.95e-06	4.18e-05	AAEL011591
LOC110676466	14.6478	1.64076	0.345343	4.75111	2.02e-06	4.33e-05	AAEL020383
LOC5580076	16.4382	-2.94098	0.619066	-4.75067	2.03e-06	4.33e-05	AAEL002138	triacylglycerol lipase, putative [Source:VB Community Annotation]
LOC110681284	24.546	-2.19181	0.461493	-4.74938	2.04e-06	4.35e-05	AAEL022515
LOC110677933	273.604	0.967519	0.203864	4.7459	2.08e-06	4.42e-05	AAEL027357
LOC110679339	2.42366	-4.79688	1.01189	-4.7405	2.13e-06	4.53e-05	AAEL024577
LOC5569632	1232.35	-0.8174	0.172431	-4.74044	2.13e-06	4.53e-05	AAEL007777	vacuolar ATP synthase subunit S1 [Source:VB Community Annotation]
LOC5573541	98.0487	-1.51455	0.319694	-4.7375	2.16e-06	4.59e-05	AAEL010583	ubiquitin conjugating enzyme 7 interacting protein [Source:VB Community Annotation]
LOC5569798	164.034	0.454724	0.0959971	4.73686	2.17e-06	4.6e-05	AAEL001314
LOC110681560	28.8736	1.38976	0.293495	4.73522	2.19e-06	4.63e-05	AAEL021796
LOC5577143	15590.8	-1.20355	0.254188	-4.73487	2.19e-06	4.63e-05	AAEL003116	phosrestin i (arrestin b) (arrestin 2) [Source:VB Community Annotation]
LOC5564403	2071.41	-0.420309	0.088808	-4.73279	2.21e-06	4.67e-05	AAEL004236	arf6 guanine nucleotide exchange factor [Source:VB Community Annotation]
LOC5572581	108.763	0.629111	0.132961	4.73154	2.23e-06	4.69e-05	AAEL009914	small nuclear ribonucleoprotein sm d2 [Source:VB Community Annotation]
LOC5570007	1963.52	-0.249174	0.0526733	-4.73055	2.24e-06	4.71e-05	AAEL000175	Eukaryotic translation initiation factor 3 subunit C [Source:UniProtKB/Swiss-Prot;Acc:Q17Q06]	eIF3-S8
LOC5579882	16.0963	-1.34364	0.284238	-4.72715	2.28e-06	4.78e-05	AAEL019573
LOC5576157	760.73	-0.734913	0.155756	-4.71837	2.38e-06	4.99e-05	AAEL012352
LOC5579251	38.5828	-1.27089	0.269377	-4.71788	2.38e-06	4.99e-05	AAEL022431
LOC110678491	5.10997	-2.92574	0.620278	-4.71682	2.4e-06	5.01e-05	AAEL022310
LOC5577049	773.362	0.300945	0.0638243	4.71522	2.41e-06	5.05e-05	AAEL020265
LOC5564628	33.2472	-1.1792	0.250118	-4.71457	2.42e-06	5.05e-05	AAEL014550	homeobox protein pknox1 [Source:VB Community Annotation]
LOC5576466	198.532	-0.607224	0.128825	-4.71355	2.43e-06	5.07e-05	AAEL002888	williams-beuren syndrome critical region protein [Source:VB Community Annotation]
LOC5573822	16.3642	-2.00941	0.426513	-4.71126	2.46e-06	5.12e-05	AAEL010745	four-jointed protein, putative [Source:VB Community Annotation]
LOC5567881	135.949	-0.866297	0.184124	-4.70497	2.54e-06	5.28e-05	AAEL006340
LOC110681130	50.6001	0.980078	0.208319	4.70471	2.54e-06	5.28e-05	AAEL020987
LOC110679715	10.6166	2.07833	0.441803	4.7042	2.55e-06	5.28e-05	AAEL024869
LOC110679007	295.527	-3.50957	0.746331	-4.70243	2.57e-06	5.32e-05	AAEL025144
LOC5564352	103.67	-2.74243	0.5834	-4.70077	2.59e-06	5.36e-05	AAEL004213	monocarboxylate transporter [Source:VB Community Annotation]
LOC5569255	136.288	-0.58806	0.125112	-4.70028	2.6e-06	5.36e-05	AAEL001228	myelin transcription factor 1, myt1 [Source:VB Community Annotation]
LOC110678853	107.177	0.649408	0.138194	4.69925	2.61e-06	5.38e-05	AAEL022936
LOC5572173	227.302	0.538677	0.114649	4.69848	2.62e-06	5.4e-05	AAEL009590	outer mitochondrial translocase subunit, putative [Source:VB Community Annotation]
LOC5564024	164.912	0.552701	0.117654	4.6977	2.63e-06	5.41e-05	AAEL014282	signalosome subunit [Source:VB Community Annotation]
LOC5574369	109.722	0.668591	0.142326	4.69759	2.63e-06	5.41e-05	AAEL011087	DNA-directed RNA polymerase II [Source:VB Community Annotation]
LOC23687556	831.515	-3.49865	0.745118	-4.69543	2.66e-06	5.45e-05	AAEL017136	cytochrome P450 [Source:VB Community Annotation]	CYP325V1
LOC5576654	320.731	-1.3108	0.279166	-4.69541	2.66e-06	5.45e-05	AAEL012685
LOC5576877	691.678	-0.268766	0.0572603	-4.69375	2.68e-06	5.49e-05	AAEL003022	serine/threonine-protein kinase [Source:VB Community Annotation]
LOC5571797	278.672	0.615505	0.13119	4.69169	2.71e-06	5.54e-05	AAEL020535
LOC5567663	68.6543	1.20163	0.25636	4.68728	2.77e-06	5.65e-05	AAEL006248	p37NB protein, putative [Source:VB Community Annotation]
LOC5565278	113.499	-0.549303	0.1172	-4.68688	2.77e-06	5.65e-05	AAEL023512
LOC5568949	135.404	-0.828718	0.176831	-4.6865	2.78e-06	5.66e-05	AAEL019428
LOC5564317	452.432	0.426146	0.0909418	4.68593	2.79e-06	5.66e-05	AAEL000568	26S proteasome non-ATPase regulatory subunit [Source:UniProtKB/TrEMBL;Acc:Q17NV4]
LOC5565979	25514.3	-0.341202	0.0728705	-4.6823	2.84e-06	5.76e-05	AAEL005097	cold induced protein (BnC24A), putative [Source:VB Community Annotation]
LOC110681313	133.866	0.638709	0.136422	4.68187	2.84e-06	5.76e-05	AAEL020938
LOC5566766	113.114	-1.23834	0.264545	-4.68101	2.85e-06	5.78e-05	AAEL005633
LOC110681270	41.1998	-0.789962	0.168805	-4.67974	2.87e-06	5.81e-05	AAEL028215
LOC110675977	38.1169	-1.40826	0.30102	-4.67828	2.89e-06	5.84e-05	AAEL023581
LOC110676008	10.3296	-2.53136	0.541195	-4.67736	2.91e-06	5.86e-05	AAEL027488
LOC5572646	1027.07	-0.399282	0.085407	-4.67505	2.94e-06	5.92e-05	AAEL001847
LOC5571495	211.955	0.406047	0.0868759	4.67388	2.96e-06	5.95e-05	AAEL001607	galactose-1-phosphate uridylyltransferase [Source:VB Community Annotation]
LOC5580329	19833.9	-0.456685	0.0978276	-4.66827	3.04e-06	6.1e-05	AAEL013069	guanine nucleotide-binding protein subunit beta-like protein [Source:VB Community Annotation]	Rack1
LOC5571938	105.508	-0.691856	0.148224	-4.66763	3.05e-06	6.11e-05	AAEL001268
LOC5574962	296.044	0.464055	0.099437	4.66682	3.06e-06	6.13e-05	AAEL011562	caspase (long) [Source:VB Community Annotation]	Dronc
LOC5566227	1793.38	-0.324537	0.069575	-4.66456	3.09e-06	6.19e-05	AAEL005254	dynactin P62 subunit [Source:VB Community Annotation]
LOC5567377	1141.92	0.697727	0.149612	4.66357	3.11e-06	6.21e-05	AAEL006022	myotubularin [Source:VB Community Annotation]
LOC5575105	20918.4	-0.243431	0.0522053	-4.66294	3.12e-06	6.22e-05	AAEL011656	40S ribosomal protein S15 [Source:UniProtKB/TrEMBL;Acc:Q16PF7]	RpS15
LOC5577064	173.871	-0.576456	0.123651	-4.66195	3.13e-06	6.25e-05	AAEL003097	calmodulin-binding transcription activator (camta), drome [Source:VB Community Annotation]
LOC5565534	301.836	-0.618828	0.132753	-4.6615	3.14e-06	6.25e-05	AAEL019740
LOC110675610	300.931	1.30338	0.279674	4.66035	3.16e-06	6.28e-05	AAEL026008
LOC23687495	2878.21	-0.334652	0.0718127	-4.66007	3.16e-06	6.28e-05	AAEL017075
LOC5575705	366.694	1.5491	0.332443	4.65975	3.17e-06	6.28e-05	AAEL012013
LOC5566978	412.708	0.37377	0.0802436	4.65795	3.19e-06	6.33e-05	AAEL005730	cop9 signalosome complex subunit [Source:VB Community Annotation]
LOC5578654	2034.72	0.493466	0.105962	4.657	3.21e-06	6.35e-05	AAEL024913
LOC5571931	433.531	-0.465053	0.0999054	-4.65493	3.24e-06	6.4e-05	AAEL009412	ligatin [Source:VB Community Annotation]
LOC110677641	32.9554	-1.87276	0.402329	-4.65481	3.24e-06	6.4e-05	AAEL027922
LOC5567948	11.2014	-1.83505	0.394517	-4.65139	3.3e-06	6.5e-05	AAEL006394
LOC5572090	17437.9	-0.276318	0.0594074	-4.65124	3.3e-06	6.5e-05	AAEL009496	40S ribosomal protein S7 [Source:UniProtKB/TrEMBL;Acc:Q0IEM1]	RpS7
LOC5565767	67.7033	-0.901069	0.193742	-4.65088	3.31e-06	6.5e-05	AAEL004976
LOC5568942	248.587	0.875321	0.188368	4.64686	3.37e-06	6.62e-05	AAEL007226	nidogen [Source:VB Community Annotation]
LOC5567070	25309.9	-0.326612	0.0702949	-4.64632	3.38e-06	6.63e-05	AAEL005817	60S ribosomal protein L26 [Source:UniProtKB/TrEMBL;Acc:Q178R6]	RpL26
LOC5566722	910.895	-0.271198	0.058473	-4.638	3.52e-06	6.89e-05	AAEL025017
LOC5564797	199.79	-0.526532	0.113537	-4.63754	3.53e-06	6.9e-05	AAEL004441	importin 9 (imp9) (ran-binding protein 9) [Source:VB Community Annotation]
LOC5569949	2494.94	-1.19827	0.258433	-4.63669	3.54e-06	6.92e-05	AAEL008815
LOC5579216	1357.55	-1.70563	0.367894	-4.63621	3.55e-06	6.93e-05	AAEL014053	vacuolar proton ATPases [Source:VB Community Annotation]
LOC110677919	19501.1	-0.268959	0.0580371	-4.63426	3.58e-06	6.98e-05	AAEL020749	60S ribosomal protein L15/L27 [Source:UniProtKB/TrEMBL;Acc:Q1HRP0]
LOC5565804	725.308	0.534841	0.115495	4.63086	3.64e-06	7.09e-05	AAEL005008	aquaporin [Source:VB Community Annotation]
LOC5571073	286.844	-1.54548	0.333906	-4.62849	3.68e-06	7.16e-05	AAEL026276
LOC5572019	1905.38	-0.528946	0.1143	-4.6277	3.7e-06	7.18e-05	AAEL000239	clathrin coat assembly protein [Source:VB Community Annotation]
LOC110679005	206.435	-3.83333	0.828613	-4.6262	3.72e-06	7.21e-05	AAEL028071
LOC5565617	455.137	0.755017	0.163205	4.62619	3.72e-06	7.21e-05	AAEL004868	hemomucin [Source:VB Community Annotation]
LOC5577505	8.63053	-4.56019	0.985754	-4.6261	3.73e-06	7.21e-05	AAEL020178
LOC5572902	248.756	-0.491756	0.106306	-4.62585	3.73e-06	7.21e-05	AAEL019711
LOC5577686	197.476	-1.92786	0.416837	-4.62497	3.75e-06	7.23e-05	AAEL013322
LOC110678740	2.82505	4.64047	1.00368	4.62348	3.77e-06	7.27e-05	AAEL021613
LOC5564251	286.127	-0.792454	0.171427	-4.62269	3.79e-06	7.29e-05	AAEL019821
LOC110678859	316.936	0.347965	0.0754304	4.61306	3.97e-06	7.63e-05	AAEL022213	26S proteasome non-ATPase regulatory subunit [Source:UniProtKB/TrEMBL;Acc:A0A1S4FP45]
LOC110679087	8.47087	-2.29096	0.497097	-4.60868	4.05e-06	7.78e-05	AAEL025177
LOC5578358	52.0509	0.925657	0.20091	4.60731	4.08e-06	7.82e-05	AAEL003516
LOC5574880	112.403	-0.996604	0.216348	-4.60648	4.1e-06	7.85e-05	AAEL022271
LOC5575211	40.8114	0.855677	0.185778	4.60591	4.11e-06	7.85e-05	AAEL011677	AMP dependent coa ligase [Source:UniProtKB/TrEMBL;Acc:A0A1S4G2Y4]
LOC23687682	6440.23	-4.90868	1.06581	-4.6056	4.11e-06	7.85e-05	AAEL017262
LOC5572192	130.238	0.583092	0.126612	4.60535	4.12e-06	7.85e-05	AAEL009608	28S ribosomal protein S16, mitochondrial [Source:VB Community Annotation]	mRpS16
LOC5574207	93.3165	-1.40756	0.305642	-4.60527	4.12e-06	7.85e-05	AAEL021698
LOC5570593	1851.55	-0.704664	0.15302	-4.60504	4.12e-06	7.85e-05	AAEL008398
LOC5569662	122.712	-3.16454	0.687204	-4.60495	4.13e-06	7.85e-05	AAEL007795	cytochrome P450 [Source:VB Community Annotation]	CYP4D37
LOC5565681	285.359	-2	0.434608	-4.60186	4.19e-06	7.95e-05	AAEL004939	Tubulin beta chain [Source:UniProtKB/TrEMBL;Acc:Q17BK5]
LOC5571618	795.599	-4.20103	0.912941	-4.60164	4.19e-06	7.95e-05	AAEL009204	glucose dehydrogenase [Source:VB Community Annotation]
LOC23687451	256.681	-0.684939	0.14887	-4.60093	4.21e-06	7.97e-05	AAEL023561
LOC5575170	6.66516	-2.37382	0.515967	-4.60072	4.21e-06	7.97e-05	AAEL000312
LOC5570822	138.781	0.648186	0.140982	4.59766	4.27e-06	8.08e-05	AAEL008610	myosin vii [Source:VB Community Annotation]
LOC5565410	229.604	0.874787	0.190322	4.59635	4.3e-06	8.11e-05	AAEL014852
LOC5576537	1770.71	-0.973111	0.211716	-4.59631	4.3e-06	8.11e-05	AAEL024887
LOC110675515	28.7716	1.09816	0.238949	4.59579	4.31e-06	8.11e-05	AAEL026079
LOC5570832	117.051	-0.761581	0.165713	-4.59578	4.31e-06	8.11e-05	AAEL008595	Protein maelstrom homolog [Source:UniProtKB/Swiss-Prot;Acc:Q16YA8]	mael
LOC5565105	132.476	-1.62804	0.354575	-4.59152	4.4e-06	8.27e-05	AAEL004592	tyrosine-protein kinase src64b [Source:VB Community Annotation]
LOC110674591	10.3692	-1.73993	0.379023	-4.59058	4.42e-06	8.3e-05	AAEL020930
LOC5564597	549.491	-0.390718	0.085143	-4.58897	4.45e-06	8.35e-05	AAEL021738
LOC5567032	19.7841	2.00721	0.437447	4.58845	4.47e-06	8.36e-05	AAEL005786
LOC5574391	30.3824	-1.38967	0.302916	-4.58763	4.48e-06	8.38e-05	AAEL011098
LOC5569166	82.0478	0.81511	0.177692	4.5872	4.49e-06	8.39e-05	AAEL007431
LOC5570006	39.894	-0.82548	0.180014	-4.58565	4.53e-06	8.44e-05	AAEL000166
LOC5567919	11.6496	1.59204	0.347292	4.58416	4.56e-06	8.49e-05	AAEL027429
LOC5563924	15.3526	-1.74995	0.381757	-4.58394	4.56e-06	8.49e-05	AAEL021100
LOC5569646	17.1799	-1.75862	0.383957	-4.58024	4.64e-06	8.62e-05	AAEL007794	defective proboscis extension response [Source:VB Community Annotation]
LOC23687962	2391.12	-3.62575	0.791631	-4.5801	4.65e-06	8.62e-05	AAEL017542
LOC5570225	104.113	0.871277	0.190231	4.58009	4.65e-06	8.62e-05	AAEL008175	mitochondrial ribosomal protein, L44, putative [Source:VB Community Annotation]	mRpL44
LOC110678059	517.142	0.73518	0.160547	4.57923	4.67e-06	8.64e-05	AAEL009660
LOC23687936	45529.7	-0.322423	0.0704101	-4.57922	4.67e-06	8.64e-05	AAEL017516
LOC5574828	447.883	-0.512498	0.111959	-4.57757	4.7e-06	8.69e-05	AAEL011441	calcium/calmodulin-dependent protein kinase type 1 (camki) [Source:VB Community Annotation]
LOC5565967	100.594	-0.567521	0.124053	-4.57482	4.77e-06	8.8e-05	AAEL020021
LOC5578909	238.935	1.1922	0.260658	4.57382	4.79e-06	8.83e-05	AAEL026746
LOC5570323	174.492	-0.807971	0.176668	-4.5734	4.8e-06	8.84e-05	AAEL001374	flagellar radial spoke protein [Source:VB Community Annotation]
LOC5575646	33.3923	-1.23199	0.269401	-4.57309	4.81e-06	8.84e-05	AAEL011986
LOC5568398	17.6789	-2.0435	0.447024	-4.57134	4.85e-06	8.9e-05	AAEL006758
LOC5573304	57.8304	1.31419	0.287671	4.56839	4.91e-06	9.02e-05	AAEL010398
LOC5565216	15.116	-5.12089	1.12102	-4.56807	4.92e-06	9.02e-05	AAEL027628
LOC5567308	1229.47	-2.25489	0.49379	-4.5665	4.96e-06	9.08e-05	AAEL005959	phospholipase b, plb1 [Source:VB Community Annotation]
LOC5563913	147.112	0.48255	0.105678	4.56622	4.97e-06	9.08e-05	AAEL003994	phenylalanyl-tRNA synthetase mitochondrial [Source:VB Community Annotation]
LOC5572531	63.9724	-1.52039	0.333071	-4.56477	5e-06	9.13e-05	AAEL009860
LOC5568591	400.987	-0.843238	0.184771	-4.5637	5.03e-06	9.17e-05	AAEL020302
LOC110675827	118.98	-0.911651	0.19977	-4.5635	5.03e-06	9.17e-05	AAEL024942
LOC5570813	28.9727	-1.16837	0.256235	-4.55977	5.12e-06	9.32e-05	AAEL024756
LOC5563646	25846.1	-0.271612	0.0596329	-4.55474	5.25e-06	9.54e-05	AAEL021083	40S ribosomal protein S25 [Source:UniProtKB/TrEMBL;Acc:Q1HRL9]	RpS25
LOC110676171	2.64561	-4.48952	0.985877	-4.55383	5.27e-06	9.57e-05	AAEL027030
LOC5574805	227.977	0.665494	0.146212	4.55156	5.32e-06	9.65e-05	AAEL019644
LOC5563584	13.8526	-1.59332	0.350063	-4.55154	5.33e-06	9.65e-05	AAEL019508
LOC23687515	15.6302	-1.49981	0.329548	-4.55111	5.34e-06	9.66e-05	AAEL017095
LOC110678608	214.408	0.599158	0.131676	4.55025	5.36e-06	9.68e-05	AAEL020116
LOC5564339	21.1572	-1.32134	0.290427	-4.54966	5.37e-06	9.7e-05	AAEL018317
LOC5567187	79.634	-3.01881	0.663583	-4.54925	5.38e-06	9.71e-05	AAEL000882
LOC5578994	316.972	0.534414	0.117506	4.54796	5.42e-06	9.75e-05	AAEL003801	28S ribosomal protein S5 [Source:VB Community Annotation]	mRpS5
LOC110680565	9.19925	-3.9888	0.877059	-4.54792	5.42e-06	9.75e-05	AAEL021682
LOC5572791	3566.81	-0.560687	0.123294	-4.54758	5.43e-06	9.75e-05	AAEL001896	UDP-N-acetylglucosamine: polypeptide-N-acetylglucosaminyl transferase, putative [Source:VB Community Annotation]
LOC5577895	31.1018	-1.37728	0.302977	-4.54583	5.47e-06	9.82e-05	AAEL001076	lipase [Source:VB Community Annotation]
LOC110676181	50.0486	1.08341	0.238377	4.54493	5.5e-06	9.85e-05	AAEL022999
LOC110680385	6.47637	-2.16681	0.476767	-4.5448	5.5e-06	9.85e-05	AAEL026841
LOC5580075	6.53778	-3.68506	0.810949	-4.54413	5.52e-06	9.87e-05	AAEL020560
LOC5564502	139.078	-0.670487	0.147565	-4.54368	5.53e-06	9.88e-05	AAEL004295	Glucose-6-phosphatase [Source:UniProtKB/TrEMBL;Acc:Q17D95]
LOC5564644	261.158	-4.66029	1.02596	-4.54237	5.56e-06	9.92e-05	AAEL004353
LOC5572162	221.608	-1.06593	0.234671	-4.54224	5.57e-06	9.92e-05	AAEL020191
LOC5568189	157.696	-0.722573	0.159092	-4.54185	5.58e-06	9.93e-05	AAEL019764
LOC5566633	835.565	0.34849	0.0767347	4.54149	5.59e-06	9.94e-05	AAEL000752
LOC110675728	103.977	-4.34302	0.957129	-4.53755	5.69e-06	0.000101014	AAEL027079
LOC5573286	467.722	-0.624029	0.137526	-4.53753	5.69e-06	0.000101014	AAEL022692
LOC110680556	100.696	-1.46996	0.324058	-4.53609	5.73e-06	0.00010159	AAEL024667
LOC5570533	1412.22	-0.336246	0.0741389	-4.53535	5.75e-06	0.000101833	AAEL028185
LOC110679012	305.799	-0.523255	0.115396	-4.53444	5.78e-06	0.000102033	AAEL019660
LOC5575334	444.753	1.08533	0.23936	4.53429	5.78e-06	0.000102033	AAEL002593	serine protease [Source:VB Community Annotation]
LOC5578848	30.9603	-1.34175	0.295932	-4.53399	5.79e-06	0.000102033	AAEL014362
LOC5571596	15204.7	-0.308077	0.0679484	-4.53398	5.79e-06	0.000102033	AAEL009185	arginine or creatine kinase [Source:VB Community Annotation]
LOC110681454	28.645	1.08727	0.23986	4.53292	5.82e-06	0.000102432	AAEL023043
LOC5570218	41.5884	-1.51328	0.333913	-4.53197	5.84e-06	0.00010271	AAEL008153
LOC5568497	22.465	-2.06432	0.455528	-4.53172	5.85e-06	0.00010271	AAEL006909
LOC5570132	180.419	-0.747925	0.165049	-4.53154	5.86e-06	0.00010271	AAEL008111
LOC5577639	357.916	-0.563533	0.124362	-4.5314	5.86e-06	0.00010271	AAEL003211	beta-carotene dioxygenase [Source:VB Community Annotation]
LOC5565337	55.9886	0.667559	0.14738	4.5295	5.91e-06	0.000103521	AAEL014831	RNA polymerase II subunit Rpb10, putative [Source:VB Community Annotation]
LOC5566497	205.816	-1.35466	0.299149	-4.52837	5.94e-06	0.000103962	AAEL005437	transient receptor potential channel [Source:VB Community Annotation]
LOC5566292	162.668	-1.33782	0.295497	-4.52737	5.97e-06	0.000104339	AAEL000739
LOC5569806	2529.17	-2.56111	0.566099	-4.52414	6.06e-06	0.000105824	AAEL001294
LOC110675597	28.6118	-1.49623	0.330864	-4.52218	6.12e-06	0.00010669	AAEL025809
LOC5568052	36.9327	-1.12364	0.248528	-4.5212	6.15e-06	0.000107069	AAEL006490	GPCR Calcitonin/Diuretic Hormone Family [Source:VB Community Annotation]	GPRCAL2
LOC110677013	166.604	-0.511649	0.113173	-4.52096	6.16e-06	0.000107073	AAEL026470
LOC5574581	7.82983	-2.15351	0.476456	-4.51986	6.19e-06	0.000107509	AAEL002410
LOC110675468	48.732	1.30079	0.288016	4.51638	6.29e-06	0.000109053	AAEL024835
LOC110674429	9.57631	-2.63144	0.582644	-4.51637	6.29e-06	0.000109053	AAEL023703
LOC5568110	3363.1	0.366237	0.0811213	4.51468	6.34e-06	0.000109803	AAEL006564	mitochondrial RNA splicing protein [Source:VB Community Annotation]
LOC110681058	295.142	0.447942	0.0992248	4.51441	6.35e-06	0.000109822	AAEL022363
LOC5578102	52.9948	-2.99081	0.662722	-4.51292	6.39e-06	0.000110477	AAEL003406
LOC110681036	10.6223	-3.17227	0.703117	-4.51172	6.43e-06	0.00011098	AAEL022290
LOC5566228	25210.9	-0.362879	0.0804635	-4.50987	6.49e-06	0.000111832	AAEL005266	40S ribosomal protein S14 [Source:UniProtKB/Swiss-Prot;Acc:Q1HR24]	RpS14
LOC5563910	574.621	0.403759	0.0895452	4.509	6.51e-06	0.000112142	AAEL027639
LOC110679862	249.976	-1.81039	0.401523	-4.50881	6.52e-06	0.000112142	AAEL025867
LOC5574528	41.1484	-0.912769	0.20248	-4.50795	6.55e-06	0.000112473	AAEL011200
LOC23687757	538.804	-3.18643	0.707478	-4.50393	6.67e-06	0.000114501	AAEL023894
LOC5579000	922.177	-0.450488	0.100028	-4.5036	6.68e-06	0.000114551	AAEL003789	exportin, putative [Source:VB Community Annotation]
LOC5572481	511.936	-0.338951	0.0753008	-4.50129	6.75e-06	0.000115679	AAEL009811
LOC5579856	3016.39	-0.541277	0.120288	-4.49984	6.8e-06	0.000116292	AAEL005849	synaptic vesicle protein [Source:VB Community Annotation]
LOC110676103	8.44988	-2.21897	0.493137	-4.4997	6.8e-06	0.000116292	AAEL025985
LOC5580215	158.914	-0.764194	0.169913	-4.49757	6.87e-06	0.000117336	AAEL011924
LOC5577608	339.127	1.98979	0.442529	4.4964	6.91e-06	0.00011782	AAEL003221	pupal cuticle protein 78E, putative [Source:VB Community Annotation]
LOC5564397	203.168	-1.58575	0.352684	-4.49623	6.92e-06	0.00011782	AAEL004231	M12 mutant protein precursor, putative [Source:UniProtKB/TrEMBL;Acc:A0A1S4F764]
LOC5578442	131.241	-1.32121	0.293883	-4.49571	6.93e-06	0.000117978	AAEL000512	Dynein heavy chain [Source:UniProtKB/TrEMBL;Acc:A0A1S4EW29]
LOC5570402	10.4485	-2.81128	0.625443	-4.49486	6.96e-06	0.000118323	AAEL021032
LOC5574358	1476.72	-0.45427	0.101111	-4.49277	7.03e-06	0.000119326	AAEL002358
LOC110675102	1540.83	-3.76677	0.838437	-4.4926	7.04e-06	0.000119326	AAEL021701
LOC5578580	11411	0.794691	0.176899	4.49234	7.04e-06	0.000119343	AAEL013766
LOC110676030	181.662	0.385245	0.08578	4.49109	7.09e-06	0.000119919	AAEL024500
LOC110675497	4.64191	-4.85121	1.08061	-4.48934	7.14e-06	0.000120777	AAEL026629
LOC5571703	355.988	0.428456	0.0954815	4.48732	7.21e-06	0.000121797	AAEL009217	mitochondrial ribosomal protein, S35, putative [Source:VB Community Annotation]	mRpS35
LOC5570212	123.201	0.603108	0.134438	4.48615	7.25e-06	0.000122337	AAEL008174
LOC110680203	27.4442	1.06366	0.23722	4.48387	7.33e-06	0.000123519	AAEL025768
LOC5579034	286.093	-1.12238	0.250383	-4.48264	7.37e-06	0.000124096	AAEL027809
LOC5565334	41.0734	-0.968639	0.216143	-4.48148	7.41e-06	0.000124639	AAEL014824
LOC5567380	427.059	-0.593585	0.132611	-4.47613	7.6e-06	0.000127668	AAEL019841
LOC5564575	629.06	0.699491	0.15628	4.47588	7.61e-06	0.000127676	AAEL004341	Carboxy/choline esterase Alpha Esterase [Source:VB Community Annotation]	CCEAE1O
LOC5577308	65.2704	-2.21688	0.495441	-4.47455	7.66e-06	0.00012834	AAEL013161	heat shock protein, putative [Source:VB Community Annotation]
LOC5571056	81.5107	-0.6651	0.148695	-4.47292	7.72e-06	0.000129181	AAEL018163
LOC110676496	1538.29	-0.536108	0.119884	-4.47189	7.75e-06	0.000129669	AAEL026390
LOC5574703	701.462	-1.71037	0.382536	-4.47113	7.78e-06	0.000129989	AAEL011350
LOC5579830	271.315	0.348186	0.0778855	4.47048	7.8e-06	0.000130181	AAEL005857
LOC5574082	81.943	-1.79741	0.402073	-4.47036	7.81e-06	0.000130181	AAEL002275	kv channel-interacting protein 1 (KChIP1) , putative [Source:VB Community Annotation]
LOC5574380	301.849	-0.434603	0.0972595	-4.46849	7.88e-06	0.000131188	AAEL011097
LOC110676540	36.4383	-1.10785	0.248059	-4.46606	7.97e-06	0.000132544	AAEL025740
LOC5577756	860.381	-1.73929	0.389587	-4.46444	8.03e-06	0.000133407	AAEL003308	trypsin, putative [Source:VB Community Annotation]
LOC5574993	19566.7	-0.34781	0.0779563	-4.4616	8.14e-06	0.000135046	AAEL025362	60S ribosomal protein L10 [Source:UniProtKB/TrEMBL;Acc:Q1HRT6]
LOC5569111	123.524	0.66872	0.149907	4.46091	8.16e-06	0.000135336	AAEL007368
LOC5570841	153.657	-0.711434	0.159551	-4.45897	8.24e-06	0.000136427	AAEL008617
LOC5566425	14.461	-1.30558	0.292832	-4.45846	8.26e-06	0.000136605	AAEL005379
LOC110679436	4298.22	-4.03156	0.904428	-4.45757	8.29e-06	0.000137026	AAEL027405
LOC5566959	28367.8	-0.34537	0.077487	-4.45713	8.31e-06	0.000137165	AAEL005722	60S ribosomal protein L7a [Source:VB Community Annotation]	RpL26
LOC5565614	216.711	-1.90365	0.427165	-4.45648	8.33e-06	0.000137357	AAEL004872
LOC5565359	66.0343	-0.932226	0.20919	-4.45635	8.34e-06	0.000137357	AAEL004761	serine/threonine-protein kinase MAK [Source:VB Community Annotation]
LOC110673999	2037.75	-0.540307	0.12125	-4.45615	8.34e-06	0.000137357	AAEL006993	synapse-associated protein [Source:VB Community Annotation]
LOC5579022	22.0082	1.88923	0.423981	4.45593	8.35e-06	0.000137358	AAEL013961
LOC5578131	1117.51	-3.79966	0.853501	-4.45185	8.51e-06	0.000139843	AAEL013515	pupal cuticle protein, putative [Source:VB Community Annotation]
LOC5570641	214.248	-1.88151	0.422876	-4.44931	8.61e-06	0.000141361	AAEL027890
LOC110676831	16857.2	-0.344815	0.0775418	-4.44683	8.71e-06	0.000142855	AAEL025362	60S ribosomal protein L10 [Source:UniProtKB/TrEMBL;Acc:Q1HRT6]
LOC5577916	91.413	-0.818311	0.184052	-4.44608	8.75e-06	0.000143102	AAEL003343
LOC5572754	53.6176	-0.93026	0.209235	-4.44601	8.75e-06	0.000143102	AAEL010021	serine/threonine-protein kinase 38 (ndr2 protein kinase) [Source:VB Community Annotation]
LOC5576882	816.967	-1.1055	0.248783	-4.44363	8.85e-06	0.00014442	AAEL003035	short wavelength sensitive opsin [Source:VB Community Annotation]	GPROP9	GPROP9_2
LOC110678654	80.871	-1.42562	0.320827	-4.44359	8.85e-06	0.00014442	AAEL023350
LOC110677659	45.9905	-0.966	0.217499	-4.44139	8.94e-06	0.000145748	AAEL020156
LOC5569664	1164.98	-2.74959	0.619278	-4.43999	9e-06	0.000146414	AAEL007808	cytochrome P450 [Source:VB Community Annotation]	CYP4D39
LOC5571651	1388.02	-0.386699	0.087095	-4.43997	9e-06	0.000146414	AAEL019827
LOC5565427	22.3531	-2.16124	0.487086	-4.43707	9.12e-06	0.000148243	AAEL000633	Toll-like receptor [Source:VB Community Annotation]	TOLL8
LOC110679672	98.1364	-0.705304	0.159026	-4.43515	9.2e-06	0.000149347	AAEL027916
LOC5565509	300.239	-0.695065	0.156722	-4.43503	9.21e-06	0.000149347	AAEL004825	potassium-dependent sodium-calcium exchanger, putative [Source:VB Community Annotation]
LOC5564717	194.837	0.572064	0.128995	4.43477	9.22e-06	0.00014937	AAEL014589	reticulocalbin [Source:VB Community Annotation]
LOC110677067	17.4987	1.54548	0.348541	4.43415	9.24e-06	0.000149646	AAEL024249
LOC5574118	11.4145	2.53327	0.571447	4.43308	9.29e-06	0.000150233	AAEL020579
LOC5570960	134.853	0.760751	0.171731	4.42989	9.43e-06	0.000152317	AAEL008692	barrier-to-autointegration factor, putative [Source:VB Community Annotation]
LOC5574793	89.0634	0.626682	0.141489	4.4292	9.46e-06	0.000152647	AAEL002483
LOC5572916	147.13	1.74995	0.395225	4.42774	9.52e-06	0.000153527	AAEL010125	leucine-rich immune protein (Coil-less) [Source:VB Community Annotation]	LRIM17
LOC5568181	202.11	-0.756605	0.170993	-4.42478	9.65e-06	0.000155487	AAEL023253
LOC5578731	635.954	0.484314	0.109512	4.42248	9.76e-06	0.000156991	AAEL013841	paraplegin [Source:VB Community Annotation]
LOC110677078	163.309	-2.01766	0.456313	-4.42165	9.79e-06	0.000157433	AAEL025385
LOC5565679	214.02	-0.440372	0.0996451	-4.4194	9.9e-06	0.000158915	AAEL021676
LOC5574652	607.911	-2.75681	0.624019	-4.41783	9.97e-06	0.000159841	AAEL011292	protease m1 zinc metalloprotease [Source:VB Community Annotation]
LOC5567960	370.902	-0.551099	0.124748	-4.41771	9.98e-06	0.000159841	AAEL024812
LOC5572018	80.787	-0.845298	0.191365	-4.41721	1e-05	0.000160047	AAEL000251
LOC5569987	389.138	-0.451897	0.102357	-4.4149	1.01e-05	0.000161596	AAEL008068
LOC110675565	11.2981	1.50324	0.340528	4.41444	1.01e-05	0.00016178	AAEL022338
LOC5576408	147.679	0.60011	0.136002	4.41252	1.02e-05	0.000163049	AAEL012502
LOC5563930	15797.2	-1.59964	0.362565	-4.412	1.02e-05	0.000163275	AAEL014231
LOC5566133	257.333	0.340482	0.0772782	4.40592	1.05e-05	0.000167754	AAEL005180
LOC5571408	136.299	-0.43165	0.0979826	-4.40537	1.06e-05	0.000168009	AAEL009048
LOC5565578	55.9608	1.81978	0.413199	4.40412	1.06e-05	0.000168812	AAEL014893	cytochrome P450 [Source:VB Community Annotation]	CYP6BB2
LOC5578272	1765.78	-1.91781	0.435585	-4.40284	1.07e-05	0.000169642	AAEL003501
LOC5567857	1095.27	0.31531	0.0716423	4.40117	1.08e-05	0.000170778	AAEL006315	26S proteasome regulatory subunit rpn1 [Source:VB Community Annotation]
LOC5563757	1150.13	-0.81387	0.184942	-4.40067	1.08e-05	0.000170837	AAEL014258	monocarboxylate transporter [Source:VB Community Annotation]
LOC110681088	547.424	-0.549316	0.124827	-4.40061	1.08e-05	0.000170837	AAEL021891
LOC5565702	1744.59	0.303164	0.068894	4.40044	1.08e-05	0.000170837	AAEL014943
LOC5574565	95.0894	0.536005	0.121925	4.3962	1.1e-05	0.000174031	AAEL027434
LOC5571311	110.658	-0.756956	0.172208	-4.39559	1.1e-05	0.000174211	AAEL008944
LOC5569576	381.215	0.316277	0.0719541	4.39553	1.11e-05	0.000174211	AAEL007767	Protein kintoun [Source:VB Community Annotation]
LOC5579899	232.957	-0.49246	0.112135	-4.39168	1.12e-05	0.000177147	AAEL001016	zinc finger protein [Source:VB Community Annotation]
LOC5570920	161.355	0.872688	0.198792	4.38996	1.13e-05	0.000178096	AAEL001485
LOC110675641	11.6969	-1.39168	0.317014	-4.38995	1.13e-05	0.000178096	AAEL020456
LOC5578114	6405.04	-3.81338	0.868677	-4.38987	1.13e-05	0.000178096	AAEL003443	threonine dehydrogenase [Source:VB Community Annotation]
LOC5576568	52.8361	-0.751455	0.171261	-4.38778	1.15e-05	0.00017963	AAEL012628
LOC5572036	445.196	-0.928576	0.211705	-4.38618	1.15e-05	0.000180776	AAEL000250	forkhead box protein (AaegFOXP) [Source:VB Community Annotation]
LOC5580259	17735.2	-0.317729	0.0724474	-4.38565	1.16e-05	0.000181034	AAEL012585	60S ribosomal protein L7 [Source:UniProtKB/TrEMBL;Acc:Q1HR81]	RpL7
LOC5579217	66.5055	1.03603	0.236252	4.3853	1.16e-05	0.000181148	AAEL026991	Endoplasmic reticulum resident protein 29 [Source:UniProtKB/TrEMBL;Acc:Q16HE7]
LOC5575535	1500.5	0.485161	0.110768	4.37999	1.19e-05	0.000185438	AAEL011905	myosin i [Source:VB Community Annotation]
LOC5577228	942.221	-0.529152	0.120851	-4.37854	1.19e-05	0.000186491	AAEL003143	inositol polyphosphate 5-phosphatase [Source:VB Community Annotation]
LOC5570967	67.3915	-1.23239	0.281484	-4.37819	1.2e-05	0.000186597	AAEL008715	AAA ATPase [Source:VB Community Annotation]
LOC5564301	332.792	0.555697	0.126956	4.37708	1.2e-05	0.000187276	AAEL018336
LOC5577442	270.071	-0.656182	0.149917	-4.37697	1.2e-05	0.000187276	AAEL024519
LOC5574676	177.392	0.645759	0.147558	4.37631	1.21e-05	0.000187654	AAEL011317	actin [Source:VB Community Annotation]
LOC5572284	16589.7	-0.322539	0.0737474	-4.37357	1.22e-05	0.000189841	AAEL001759	40S ribosomal protein S9 [Source:UniProtKB/TrEMBL;Acc:Q1HRP3]	RpS9
LOC110675257	302.165	-1.79176	0.409777	-4.37253	1.23e-05	0.000190442	AAEL025410
LOC5576842	224.901	0.671684	0.153617	4.37245	1.23e-05	0.000190442	AAEL012820
LOC110676318	25.7413	-2.03991	0.466582	-4.37203	1.23e-05	0.000190615	AAEL027058
LOC23687788	1764.23	0.420952	0.0963242	4.37016	1.24e-05	0.000192068	AAEL017368
LOC5573727	54.1175	-1.03749	0.23752	-4.36802	1.25e-05	0.000193771	AAEL010710	gamma-aminobutyric-acid receptor a beta subunit 1, 2, 3, [Source:VB Community Annotation]
LOC5572413	129.117	2.26934	0.519664	4.36695	1.26e-05	0.000194531	AAEL009803	phaF protein, putative [Source:VB Community Annotation]
LOC5578458	637.984	-0.762929	0.174729	-4.36636	1.26e-05	0.000194857	AAEL000523	ring finger protein [Source:VB Community Annotation]
LOC5571256	179.002	-1.68424	0.38592	-4.36421	1.28e-05	0.000196494	AAEL001568	glycine receptor beta precursor, putative [Source:VB Community Annotation]
LOC23687817	4822.39	-3.07026	0.703537	-4.36404	1.28e-05	0.000196494	AAEL017397
LOC5563590	40685.1	-0.305734	0.0700598	-4.36389	1.28e-05	0.000196494	AAEL000032	40S ribosomal protein S6 [Source:UniProtKB/Swiss-Prot;Acc:Q9U761]	RpS6
LOC110674702	15.7038	-2.03515	0.466405	-4.36349	1.28e-05	0.000196631	AAEL025891
LOC110675313	8.29372	-2.23987	0.513366	-4.36311	1.28e-05	0.000196631	AAEL023872
LOC5566714	319.902	0.610117	0.139836	4.3631	1.28e-05	0.000196631	AAEL019661
LOC5574704	1725.86	-0.312082	0.071536	-4.36258	1.29e-05	0.000196899	AAEL011340	U1 small nuclear ribonucleoprotein 70 kd [Source:VB Community Annotation]
LOC110679642	1096.29	-3.86139	0.885679	-4.3598	1.3e-05	0.000199222	AAEL020895
LOC5567068	5898.21	-0.793728	0.182213	-4.35604	1.32e-05	0.000202458	AAEL005798	ATP synthase subunit beta vacuolar [Source:VB Community Annotation]
LOC5570809	177.816	0.480885	0.1104	4.35585	1.33e-05	0.000202458	AAEL008582	40S ribosomal protein S2 [Source:VB Community Annotation]	RpS2
LOC110675727	505.49	-3.58809	0.823868	-4.35518	1.33e-05	0.00020283	AAEL020856
LOC5564068	2899.29	-0.932058	0.214019	-4.35502	1.33e-05	0.00020283	AAEL025030
LOC5576117	59.9926	-0.829453	0.190498	-4.35413	1.34e-05	0.000203459	AAEL002786
LOC5575798	212.024	0.464525	0.106754	4.35135	1.35e-05	0.00020578	AAEL012077	NAD dehydrogenase [Source:VB Community Annotation]
LOC5577191	1179.53	-0.574533	0.132039	-4.35122	1.35e-05	0.00020578	AAEL013076	signal recognition particle 54 kda protein [Source:VB Community Annotation]
LOC5579950	1279.54	-0.450421	0.103562	-4.34928	1.37e-05	0.000207403	AAEL006791	rab6 GTPase activating protein, gapcena (rabgap1 protein) [Source:VB Community Annotation]
LOC110680553	1823.85	-0.654101	0.150417	-4.34859	1.37e-05	0.000207862	AAEL022056
LOC5579842	34.6643	-2.30589	0.530302	-4.34826	1.37e-05	0.00020797	AAEL005855	amino acid transporter [Source:VB Community Annotation]
LOC5565107	30.7806	1.12316	0.258379	4.34693	1.38e-05	0.000209028	AAEL023691
LOC110675223	26.5382	-1.2469	0.287022	-4.34428	1.4e-05	0.000211366	AAEL023243
LOC110677273	13.611	-1.7785	0.409499	-4.3431	1.4e-05	0.000212304	AAEL026228
LOC110677954	6.0533	2.31838	0.533932	4.34209	1.41e-05	0.000213076	AAEL025084
LOC5568602	335.588	0.418522	0.0964488	4.33931	1.43e-05	0.000215577	AAEL001103	prefoldin, subunit, putative [Source:VB Community Annotation]
LOC110679400	5.57957	-2.90744	0.670114	-4.33872	1.43e-05	0.000215948	AAEL021710
LOC5568798	101.277	-0.517023	0.119204	-4.33731	1.44e-05	0.000217129	AAEL007143	voltage-gated potassium channel [Source:VB Community Annotation]
LOC110678800	21.563	-5.4287	1.25211	-4.33563	1.45e-05	0.00021856	AAEL020188
LOC110676397	8.0824	1.93788	0.446986	4.33545	1.45e-05	0.00021856	AAEL020608
LOC110676555	9.68386	-1.92549	0.444159	-4.33515	1.46e-05	0.000218642	AAEL021693
LOC5573316	469.28	-0.796701	0.183788	-4.33489	1.46e-05	0.00021869	AAEL010414	set domain protein [Source:VB Community Annotation]
LOC5564604	959.269	-0.257239	0.0593695	-4.33285	1.47e-05	0.000220515	AAEL014529
LOC5575374	90.5088	-0.544734	0.125766	-4.33132	1.48e-05	0.000221739	AAEL011780	DNA mismatch repair protein muts [Source:VB Community Annotation]
LOC110681331	24.1165	-0.987184	0.227923	-4.33122	1.48e-05	0.000221739	AAEL021880
LOC5563960	1292.74	0.279679	0.0645764	4.33097	1.48e-05	0.000221773	AAEL004010	splicing factor, putative [Source:VB Community Annotation]
LOC110676737	7.11799	-2.08947	0.482634	-4.32931	1.5e-05	0.000223237	AAEL024439
LOC5578666	165.422	1.13395	0.261963	4.32866	1.5e-05	0.000223686	AAEL003640	sodium/chloride dependent amino acid transporter [Source:VB Community Annotation]
LOC5565386	162.068	0.426918	0.098653	4.32747	1.51e-05	0.000224681	AAEL004757	cleavage and polyadenylation specificity factor [Source:VB Community Annotation]
LOC110679441	156.087	-0.523509	0.120985	-4.32705	1.51e-05	0.000224903	AAEL020344
LOC5576784	30.7562	1.31841	0.304764	4.326	1.52e-05	0.000225762	AAEL012764
LOC5576016	190.884	-0.716975	0.165934	-4.32085	1.55e-05	0.000230876	AAEL012249
LOC5565485	321.454	-0.465155	0.107762	-4.31652	1.59e-05	0.000235229	AAEL004819
LOC5571310	479.029	-1.46577	0.339622	-4.31587	1.59e-05	0.000235693	AAEL008943	chromatin assembly factor 1, p180-subunit, putative [Source:VB Community Annotation]
LOC5575483	133.784	-1.12228	0.26013	-4.31431	1.6e-05	0.000237138	AAEL011869
LOC110674725	51.0651	1.20225	0.278714	4.31358	1.61e-05	0.000237699	AAEL028222
LOC5570698	235.005	-0.487759	0.113091	-4.31296	1.61e-05	0.000238098	AAEL001457	guanylatte cyclase alpha 1 subunit [Source:VB Community Annotation]
LOC5579056	85.9704	-0.797456	0.184905	-4.31279	1.61e-05	0.000238098	AAEL013996
LOC5576427	106.087	-0.711796	0.165074	-4.31197	1.62e-05	0.000238763	AAEL012519	actin binding protein, putative [Source:VB Community Annotation]
LOC5570724	13.4075	-1.59798	0.370689	-4.31085	1.63e-05	0.000239751	AAEL001452
LOC110676774	433.773	1.13253	0.262762	4.3101	1.63e-05	0.000240336	AAEL027182
LOC5569934	879.735	-1.55176	0.360058	-4.30974	1.63e-05	0.0002405	AAEL008032
LOC5579144	73.5959	1.24022	0.287894	4.30792	1.65e-05	0.000242267	AAEL014019	cytochrome P450 [Source:VB Community Annotation]	CYP4J16
LOC5578710	296.672	-0.924821	0.214782	-4.30585	1.66e-05	0.000244306	AAEL013823	calcium/calmodulin dependent protein kinase ii [Source:VB Community Annotation]
LOC5568821	231.016	0.421106	0.0978324	4.30436	1.67e-05	0.000245729	AAEL001191
LOC5579831	135.486	-0.443559	0.103069	-4.30353	1.68e-05	0.000246425	AAEL005863
LOC5575022	418.254	1.02245	0.237596	4.30332	1.68e-05	0.000246426	AAEL011586
LOC5569520	1453.98	0.379699	0.0882421	4.30292	1.69e-05	0.000246644	AAEL007707	malate dehydrogenase [Source:VB Community Annotation]
LOC5576950	3719.41	0.268261	0.0623504	4.30248	1.69e-05	0.000246906	AAEL012904	rab gdp-dissociation inhibitor [Source:VB Community Annotation]
LOC5566370	440.127	0.467034	0.10859	4.30091	1.7e-05	0.000248256	AAEL005354	dynein light chain, putative [Source:VB Community Annotation]
LOC5565738	108.488	-0.482454	0.11218	-4.30073	1.7e-05	0.000248256	AAEL004940	zinc finger protein [Source:VB Community Annotation]
LOC110674880	15.7454	1.84169	0.428241	4.30059	1.7e-05	0.000248256	AAEL024432
LOC5568087	103.433	0.543675	0.126423	4.30044	1.7e-05	0.000248256	AAEL006521	COX assembly mitochondrial protein [Source:UniProtKB/TrEMBL;Acc:Q0IF43]
LOC5573728	1289.52	-0.782474	0.182009	-4.29909	1.72e-05	0.000249336	AAEL010712	low-density lipoprotein receptor (ldl) [Source:VB Community Annotation]
LOC5570207	2.33943	-4.34123	1.00981	-4.29907	1.72e-05	0.000249336	AAEL021269
LOC110681487	134.244	-1.09088	0.253795	-4.29827	1.72e-05	0.000250001	AAEL013545
LOC5572265	2417.03	-0.429472	0.0999906	-4.29513	1.75e-05	0.000253339	AAEL001769	DEAD box ATP-dependent RNA helicase [Source:VB Community Annotation]
LOC110674458	10.9766	1.51045	0.351898	4.2923	1.77e-05	0.000256346	AAEL023673
LOC5571369	290.068	2.01043	0.468435	4.2918	1.77e-05	0.000256587	AAEL008969	adult cuticle protein, putative [Source:VB Community Annotation]
LOC5576383	897.426	-0.273785	0.0637942	-4.29168	1.77e-05	0.000256587	AAEL012475	jnk/sapk-associated protein [Source:VB Community Annotation]
LOC5569151	101.447	-1.91983	0.448102	-4.28436	1.83e-05	0.000264901	AAEL025281
LOC110674235	6.45313	2.36959	0.553132	4.28395	1.84e-05	0.000264901	AAEL021803
LOC5566545	38.3207	-1.11831	0.261078	-4.28341	1.84e-05	0.000264901	AAEL005479	synaptogyrin, [Source:VB Community Annotation]
LOC5575304	320.991	0.60944	0.142284	4.28325	1.84e-05	0.000264901	AAEL019566
LOC110678633	19.096	-1.18545	0.276765	-4.28325	1.84e-05	0.000264901	AAEL020219
LOC5579127	102.688	-0.927842	0.216637	-4.28294	1.84e-05	0.000264901	AAEL003853	nephrin [Source:VB Community Annotation]
LOC5578155	16966.8	-0.268541	0.0627002	-4.28293	1.84e-05	0.000264901	AAEL013533
LOC110680267	139.778	0.514031	0.120019	4.28291	1.84e-05	0.000264901	AAEL027000
LOC5568387	192.714	0.989103	0.23095	4.28276	1.85e-05	0.000264901	AAEL006771
LOC110681240	19.8944	1.54057	0.359889	4.28068	1.86e-05	0.000267139	AAEL025230
LOC5564970	325.345	-0.885834	0.206999	-4.27941	1.87e-05	0.000268424	AAEL004533	GPCR Metabotropic glutamate Family [Source:VB Community Annotation]	GPRMGL2
LOC5574316	1492.98	-0.470843	0.110031	-4.27916	1.88e-05	0.000268477	AAEL002357
LOC5573590	566.73	-0.319909	0.0747771	-4.27817	1.88e-05	0.000269438	AAEL019577
LOC110675666	142.165	-1.97737	0.46254	-4.27502	1.91e-05	0.000273015	AAEL023507
LOC5570734	20.5597	-1.68708	0.394853	-4.27269	1.93e-05	0.000275644	AAEL008511
LOC5574872	137.753	0.426499	0.0998701	4.27054	1.95e-05	0.000278058	AAEL011476
LOC5565917	25.7888	-1.15109	0.269561	-4.27023	1.95e-05	0.000278161	AAEL000698
LOC5574111	18.8067	1.18428	0.277346	4.27005	1.95e-05	0.000278161	AAEL002276	serine protease, putative [Source:VB Community Annotation]
LOC5572959	30717.9	-5.26097	1.23297	-4.26693	1.98e-05	0.000281828	AAEL010186
LOC5576203	46.419	0.797258	0.186898	4.26575	1.99e-05	0.000283063	AAEL012398
LOC110680948	87.6878	0.713878	0.167365	4.26541	2e-05	0.000283239	AAEL021792
LOC110676628	40.3612	1.01789	0.238765	4.26316	2.02e-05	0.000285844	AAEL022339
LOC5571011	179.762	0.517625	0.12145	4.26204	2.03e-05	0.000287022	AAEL008736	p31A, putative [Source:VB Community Annotation]
LOC5574827	286.735	-0.460358	0.108095	-4.25885	2.05e-05	0.000290889	AAEL023286
LOC5573350	35.8604	-1.09083	0.256153	-4.25849	2.06e-05	0.000291085	AAEL010444
LOC5578489	2095.22	-0.598403	0.140528	-4.25824	2.06e-05	0.000291152	AAEL003551
LOC5576013	981.252	0.843675	0.198177	4.25719	2.07e-05	0.000292266	AAEL012245
LOC5569126	149.777	-0.559854	0.131621	-4.25353	2.1e-05	0.00029682	AAEL007388
LOC5565406	124.023	0.929487	0.218596	4.25208	2.12e-05	0.000298467	AAEL014844
LOC110677852	279.128	0.436204	0.102596	4.25168	2.12e-05	0.00029874	AAEL022168	50S ribosomal protein L35 [Source:UniProtKB/TrEMBL;Acc:A0A0P6IVN7]
LOC5571261	115.097	0.566928	0.133383	4.25039	2.13e-05	0.000300198	AAEL001545
LOC5574556	631.329	0.762258	0.179353	4.25003	2.14e-05	0.000300402	AAEL011231
LOC5567482	33.8613	-1.00419	0.236316	-4.24933	2.14e-05	0.000301079	AAEL019703
LOC5570836	121.853	0.424492	0.0999225	4.24822	2.15e-05	0.000302306	AAEL008593	NAD dependent epimerase/dehydratase [Source:VB Community Annotation]
LOC5569989	12204.8	-3.30629	0.778388	-4.24762	2.16e-05	0.000302843	AAEL008066	trkB protein, putative [Source:VB Community Annotation]
LOC5572904	256.104	-0.572264	0.134744	-4.24704	2.17e-05	0.000303352	AAEL010120	chondroitin 4-sulfotransferase [Source:VB Community Annotation]
LOC5569438	470.951	0.433453	0.102067	4.24673	2.17e-05	0.000303481	AAEL001236
LOC5579525	12755.7	-0.285499	0.0672308	-4.24655	2.17e-05	0.000303481	AAEL014562	60S ribosomal protein L12 [Source:VB Community Annotation]	RpL12
LOC5569251	20.7492	-1.18798	0.280089	-4.24145	2.22e-05	0.000310176	AAEL001231	MIND-MELD/ADAM [Source:VB Community Annotation]
LOC5578743	2064.11	0.496913	0.117202	4.2398	2.24e-05	0.000312196	AAEL003658	laminin beta-2 chain [Source:VB Community Annotation]
LOC5573138	4971.71	0.631028	0.148864	4.23896	2.25e-05	0.000313079	AAEL001969	protein serine/threonine kinase, putative [Source:VB Community Annotation]
LOC5565051	576.511	0.3095	0.0730319	4.23787	2.26e-05	0.000314328	AAEL004563	26S protease regulatory subunit S10b [Source:VB Community Annotation]
LOC5571258	238.653	-0.379209	0.0895108	-4.23646	2.27e-05	0.00031602	AAEL001581
LOC23687710	813.935	0.403235	0.0952006	4.23564	2.28e-05	0.000316904	AAEL017290	Coiled-coil domain-containing protein 72 homolog [Source:VB Community Annotation]
LOC110675724	80.4504	-3.79489	0.896202	-4.23442	2.29e-05	0.000318343	AAEL024834
LOC110680797	179.704	0.608342	0.143679	4.23405	2.3e-05	0.000318585	AAEL024731
LOC110675794	23.1982	1.08506	0.256398	4.23194	2.32e-05	0.000321012	AAEL026681
LOC5564807	144.891	-0.485362	0.114693	-4.23185	2.32e-05	0.000321012	AAEL009593
LOC5577768	138.84	-1.15729	0.273479	-4.23175	2.32e-05	0.000321012	AAEL003322	protein phosphatase-7 [Source:VB Community Annotation]
LOC5569772	382.602	0.316223	0.0747487	4.23049	2.33e-05	0.000322526	AAEL007895	beta-1,4-galactosyltransferase [Source:VB Community Annotation]
LOC110674164	296.907	0.476769	0.112707	4.23015	2.34e-05	0.000322722	AAEL011982	cortactin [Source:VB Community Annotation]
LOC110677827	183.406	-2.43871	0.576564	-4.22973	2.34e-05	0.00032304	AAEL025080
LOC5571070	3843.97	0.839882	0.198783	4.22512	2.39e-05	0.000329432	AAEL008785
LOC110677858	33.7768	1.16605	0.275992	4.22493	2.39e-05	0.000329432	AAEL025812
LOC5573753	372.626	0.409107	0.0968487	4.22419	2.4e-05	0.000329942	AAEL000270	26S proteasome regulatory subunit 7, psd7 [Source:UniProtKB/TrEMBL;Acc:Q17PP0]
LOC110681392	280.521	-3.5591	0.842552	-4.22418	2.4e-05	0.000329942	AAEL023015
LOC5573070	524.076	-1.11103	0.263049	-4.22365	2.4e-05	0.000330429	AAEL022986
LOC5569595	100.36	-0.708801	0.167829	-4.22336	2.41e-05	0.000330568	AAEL001245	heterogeneous nuclear ribonucleoprotein [Source:VB Community Annotation]
LOC5564711	143.169	-2.98574	0.707308	-4.22127	2.43e-05	0.000333353	AAEL014579	trypsin, putative [Source:VB Community Annotation]
LOC5574271	24656.5	-1.65911	0.39306	-4.221	2.43e-05	0.000333433	AAEL022261
LOC5569202	1116.58	0.563141	0.13342	4.22083	2.43e-05	0.000333433	AAEL007476	makorin [Source:VB Community Annotation]
LOC5567942	430.07	0.497632	0.118001	4.21718	2.47e-05	0.000338574	AAEL006389	cathepsin l [Source:VB Community Annotation]
LOC5576221	3257.81	0.479336	0.113698	4.21587	2.49e-05	0.00034024	AAEL002833	cathepsin l [Source:VB Community Annotation]
LOC110681444	35.9372	-4.94142	1.17341	-4.21115	2.54e-05	0.000347125	AAEL025934
LOC5569150	189.865	0.70654	0.167862	4.20906	2.56e-05	0.000350052	AAEL021595
LOC110674882	16.5006	1.77404	0.421646	4.20742	2.58e-05	0.000352149	AAEL023911
LOC5564641	64.356	0.687628	0.163436	4.20732	2.58e-05	0.000352149	AAEL004355
LOC110676765	2097.13	-2.76261	0.656794	-4.2062	2.6e-05	0.000353586	AAEL019894	Tubulin beta chain [Source:UniProtKB/TrEMBL;Acc:Q0PHP3]
LOC5571216	2737.7	0.641418	0.152534	4.20508	2.61e-05	0.000355034	AAEL021756
LOC5565330	307.178	0.766058	0.18219	4.20472	2.61e-05	0.000355286	AAEL014821
LOC5575021	1357.86	-0.450263	0.107099	-4.20419	2.62e-05	0.000355817	AAEL019496
LOC5578555	169.318	-1.59253	0.378849	-4.2036	2.63e-05	0.000356433	AAEL003564	threonine dehydratase/deaminase [Source:VB Community Annotation]
LOC5564943	48.1382	0.739407	0.175934	4.20276	2.64e-05	0.000357457	AAEL004486	valacyclovir hydrolase [Source:VB Community Annotation]
LOC5577698	1284.31	-0.392246	0.0933437	-4.20217	2.64e-05	0.000358077	AAEL021542
LOC5568889	225.591	-2.34611	0.55835	-4.20186	2.65e-05	0.00035826	AAEL007194	pupal cuticle protein, putative [Source:VB Community Annotation]
LOC5577468	58.6753	-0.939583	0.223622	-4.20165	2.65e-05	0.00035828	AAEL013204
LOC5572022	15.3635	-1.38504	0.329682	-4.20115	2.66e-05	0.000358757	AAEL000243	leucine-rich transmembrane protein [Source:VB Community Annotation]
LOC5569199	114.329	-0.440697	0.104923	-4.2002	2.67e-05	0.000359964	AAEL007468	zinc finger protein, putative [Source:VB Community Annotation]
LOC5575111	92.8071	-0.605866	0.144274	-4.19941	2.68e-05	0.000360915	AAEL011658	plasma glutamate carboxypeptidase [Source:VB Community Annotation]
LOC5573039	109.307	-0.986381	0.234979	-4.19774	2.7e-05	0.000363183	AAEL021387
LOC5567584	120.576	-2.24097	0.533871	-4.1976	2.7e-05	0.000363183	AAEL006176	odorant binding protein OBP27 [Source:VB Community Annotation]	OBP27
LOC5570496	181.418	-0.463996	0.110572	-4.19632	2.71e-05	0.000364922	AAEL023787
LOC5571502	391.204	-1.83101	0.436443	-4.1953	2.73e-05	0.000366249	AAEL001601
LOC5568985	49.5735	-1.01603	0.242264	-4.19389	2.74e-05	0.000368221	AAEL007276
LOC5568049	59.7351	-1.0639	0.253883	-4.1905	2.78e-05	0.000373453	AAEL006496	steroid dehydrogenase [Source:VB Community Annotation]
LOC110675720	4319.5	-3.0178	0.72063	-4.18772	2.82e-05	0.00037748	AAEL022409
LOC5579975	1712.41	-0.848035	0.202507	-4.18767	2.82e-05	0.00037748	AAEL014450	Peptidyl-glycine alpha-amidating monooxygenase [Source:UniProtKB/TrEMBL;Acc:A0A1S4G1Z5]
LOC5566838	15.2643	2.04726	0.488986	4.18675	2.83e-05	0.000378692	AAEL029011
LOC110674214	127.955	-1.26519	0.302403	-4.18377	2.87e-05	0.000383371	AAEL024306
LOC5574823	110.776	-1.62118	0.387553	-4.1831	2.88e-05	0.000384169	AAEL002485	WD repeat-containing protein on Y chromosome (WD40 Y) [Source:VB Community Annotation]	WDY
LOC5574713	199.058	0.593161	0.141884	4.18059	2.91e-05	0.000388106	AAEL011355	carnitine o-acetyltransferase [Source:VB Community Annotation]
LOC5568062	378.046	-2.48296	0.594092	-4.17941	2.92e-05	0.000389794	AAEL006482	sugar transporter [Source:VB Community Annotation]
LOC5567294	2263.97	-1.72263	0.412344	-4.17765	2.95e-05	0.000392482	AAEL005950	chloride channel protein 2 [Source:VB Community Annotation]
LOC110677746	2.42752	-4.38235	1.04905	-4.17744	2.95e-05	0.000392521	AAEL021740
LOC5567253	97.8725	0.680305	0.162981	4.17413	2.99e-05	0.000397936	AAEL005926	ER lumen protein retaining receptor [Source:VB Community Annotation]
LOC110676631	4.4332	-4.60035	1.10232	-4.17332	3e-05	0.000399009	AAEL022898
LOC5568668	1500.89	-0.308546	0.0739869	-4.17028	3.04e-05	0.000404024	AAEL007022	tfiia large subunit [Source:VB Community Annotation]
LOC110675839	989.356	0.203455	0.0488032	4.16889	3.06e-05	0.00040615	AAEL024800
LOC5570575	413.964	0.444199	0.106573	4.16802	3.07e-05	0.000407368	AAEL008394
LOC5564379	338.2	0.47835	0.114831	4.1657	3.1e-05	0.000411183	AAEL014414	DEAD box ATP-dependent RNA helicase [Source:VB Community Annotation]
LOC5569250	69.8581	-0.739438	0.177603	-4.16342	3.14e-05	0.000414954	AAEL026835
LOC5565246	3096.6	-0.311363	0.0747895	-4.1632	3.14e-05	0.000415016	AAEL014768	glutamate synthase [Source:VB Community Annotation]
LOC5569200	13.1542	-1.96228	0.471378	-4.16287	3.14e-05	0.000415095	AAEL007456	zinc finger protein, putative [Source:VB Community Annotation]
LOC5573200	415.282	0.42313	0.101646	4.16277	3.14e-05	0.000415095	AAEL001998
LOC5570311	495.866	-0.318942	0.0766214	-4.16257	3.15e-05	0.000415111	AAEL008242	hook protein [Source:VB Community Annotation]
LOC5567235	529.112	0.969792	0.233101	4.16039	3.18e-05	0.000418735	AAEL000890
LOC5567505	320.684	0.424625	0.102088	4.15939	3.19e-05	0.000419889	AAEL006118	mitochondrial ribosomal protein, L55 [Source:VB Community Annotation]	mRpL55
LOC5569531	17124	-0.322323	0.077493	-4.15938	3.19e-05	0.000419889	AAEL007715	60S ribosomal protein L21 [Source:UniProtKB/TrEMBL;Acc:Q1HRN4]	RpL21
LOC110679653	6.5628	3.04111	0.731269	4.15868	3.2e-05	0.000420818	AAEL028191
LOC110675602	8.8429	-1.65323	0.397606	-4.15796	3.21e-05	0.000421448	AAEL022962
LOC110675603	8.8429	-1.65323	0.397606	-4.15796	3.21e-05	0.000421448	AAEL026594
LOC5565097	1155.08	-1.09702	0.263952	-4.15613	3.24e-05	0.000424482	AAEL004583
LOC5577421	260.024	-0.307697	0.0740408	-4.15577	3.24e-05	0.000424783	AAEL003151
LOC5568089	755.607	-0.302389	0.0727839	-4.15461	3.26e-05	0.000426585	AAEL006519
LOC5580179	59.327	-0.597033	0.143813	-4.15146	3.3e-05	0.000432016	AAEL002569	serine/threonine kinase [Source:VB Community Annotation]
LOC5573079	1237.67	-0.787163	0.189625	-4.15116	3.31e-05	0.000432016	AAEL010262
LOC5569908	43.7027	-0.821206	0.197826	-4.15115	3.31e-05	0.000432016	AAEL007999
LOC5574386	362.756	-0.286087	0.068971	-4.14793	3.36e-05	0.000437772	AAEL011093	homer [Source:VB Community Annotation]
LOC110675993	286.983	-0.801746	0.193335	-4.14693	3.37e-05	0.000439323	AAEL024527
LOC5579666	787.862	-1.78923	0.431543	-4.14613	3.38e-05	0.000440474	AAEL003963	calpain 4, 6, 7, invertebrate [Source:VB Community Annotation]
LOC5566140	72.1468	0.663143	0.160005	4.14452	3.41e-05	0.000443222	AAEL005171
LOC5576009	63.3162	-0.815	0.196731	-4.14271	3.43e-05	0.000446362	AAEL012239	testis development protein nyd-sp29 [Source:VB Community Annotation]
LOC5576728	94.5645	-0.533089	0.128786	-4.13935	3.48e-05	0.000452113	AAEL002979
LOC5570027	25.0302	-1.1251	0.271825	-4.13908	3.49e-05	0.000452113	AAEL000187	lim-kinase1 [Source:VB Community Annotation]
LOC5570581	336.326	0.471959	0.114027	4.13903	3.49e-05	0.000452113	AAEL008393	phosphatidylserine synthase [Source:VB Community Annotation]
LOC5570883	270.67	0.791902	0.191326	4.13902	3.49e-05	0.000452113	AAEL008658	leucine-rich immune protein (TM) [Source:VB Community Annotation]	LRIM16
LOC5566113	318.846	-3.42857	0.828421	-4.13868	3.49e-05	0.000452406	AAEL023662
LOC5570274	515.655	1.03734	0.25075	4.13693	3.52e-05	0.000455484	AAEL008219	elongase, putative [Source:VB Community Annotation]
LOC5565217	27.723	-1.18869	0.287373	-4.13639	3.53e-05	0.000456178	AAEL004669
LOC5576181	188.694	-0.813467	0.196705	-4.13547	3.54e-05	0.000457633	AAEL021026
LOC5570121	159.076	-0.447916	0.108349	-4.13401	3.56e-05	0.000459955	AAEL025815
LOC5578906	405.936	-0.385045	0.0931426	-4.13393	3.57e-05	0.000459955	AAEL013905
LOC5564267	12.8654	2.4763	0.599052	4.13371	3.57e-05	0.000460021	AAEL014363
LOC5573396	100.159	-0.465293	0.112606	-4.13206	3.6e-05	0.000462834	AAEL002051	sodium/hydrogen exchanger 7, 9 (nhe7, nhe9) [Source:VB Community Annotation]
LOC5572379	8.49052	-1.58558	0.383747	-4.13184	3.6e-05	0.000462834	AAEL009763
LOC5577757	102.355	1.44254	0.349136	4.13174	3.6e-05	0.000462834	AAEL003294	fibrinogen and fibronectin [Source:VB Community Annotation]
LOC110674134	158.519	-0.685292	0.165883	-4.13117	3.61e-05	0.000463612	AAEL023884
LOC5571997	827.143	-0.991453	0.2402	-4.12761	3.67e-05	0.000470449	AAEL009487
LOC110676147	149.442	-4.05034	0.981844	-4.12524	3.7e-05	0.00047494	AAEL020342
LOC5573182	269.724	0.50033	0.121291	4.12504	3.71e-05	0.000474967	AAEL001972	TATA box binding protein (TBP)-associated factor,, putative [Source:VB Community Annotation]
LOC110676569	281.871	0.46799	0.11347	4.12435	3.72e-05	0.000475997	AAEL025618
LOC5570877	209.701	-0.444544	0.107805	-4.12359	3.73e-05	0.000476879	AAEL008656	UDP-galactose transporter [Source:VB Community Annotation]
LOC5572489	23.3596	-2.02649	0.491443	-4.12355	3.73e-05	0.000476879	AAEL015412	metalloproteinase, putative [Source:VB Community Annotation]
LOC5572235	37.2957	-0.948365	0.23001	-4.12315	3.74e-05	0.000477321	AAEL019491
LOC110679479	6.97405	3.27396	0.794098	4.12287	3.74e-05	0.000477498	AAEL022746
LOC5573819	621.786	-0.845085	0.205	-4.12236	3.75e-05	0.000478182	AAEL010742	Elongation factor G, mitochondrial Precursor (EF-Gmt)(Elongation factor G 1, mitochondrial)(mEF-G 1)(Elongation factor G1) [Source:VB Community Annotation]
LOC5568482	540.097	-0.68177	0.165409	-4.12173	3.76e-05	0.000479094	AAEL006880	Rab32 [Source:UniProtKB/TrEMBL;Acc:A0A1S4FEX4]
LOC5566469	110.671	0.512836	0.12444	4.12115	3.77e-05	0.000479653	AAEL005412	annexin x [Source:VB Community Annotation]
LOC110681070	168.76	-2.5976	0.630319	-4.12109	3.77e-05	0.000479653	AAEL023711
LOC5568274	189.216	-0.781174	0.189615	-4.1198	3.79e-05	0.000481838	AAEL022413
LOC5573836	172.206	-0.906231	0.219977	-4.11967	3.79e-05	0.000481838	AAEL010757
LOC5568968	100.947	-0.826647	0.200704	-4.11874	3.81e-05	0.000483399	AAEL007268
LOC5567591	98.8216	-0.622053	0.15104	-4.11846	3.81e-05	0.000483593	AAEL024064
LOC5569062	25.9479	-1.27668	0.310078	-4.11728	3.83e-05	0.00048567	AAEL001196	cadherin [Source:VB Community Annotation]
LOC110678752	38.6889	-0.749966	0.182305	-4.1138	3.89e-05	0.000492654	AAEL027926
LOC5566839	12.0676	2.58435	0.628347	4.11293	3.91e-05	0.00049412	AAEL015280
LOC5577454	68.3248	-1.40598	0.341903	-4.11222	3.92e-05	0.000495252	AAEL022248
LOC5568625	4544.97	-1.40868	0.342585	-4.1119	3.92e-05	0.000495525	AAEL006975	leucine aminopeptidase [Source:VB Community Annotation]
LOC5573026	33.7265	-1.53683	0.373823	-4.11112	3.94e-05	0.000496817	AAEL010201	axonemal dynein intermediate chain [Source:VB Community Annotation]
LOC5570811	156.929	-0.630758	0.153436	-4.1109	3.94e-05	0.000496889	AAEL008579	Zinc finger protein [Source:UniProtKB/TrEMBL;Acc:A0A1S4FJV9]
LOC5572316	435.259	0.542975	0.13209	4.11064	3.95e-05	0.000497051	AAEL009708	thioredoxin M, putative [Source:VB Community Annotation]
LOC5570694	383.372	-0.608263	0.148022	-4.10928	3.97e-05	0.000499569	AAEL008497
LOC5572569	666.823	-0.745922	0.181571	-4.10815	3.99e-05	0.000501633	AAEL009881	dynein heavy chain [Source:VB Community Annotation]
LOC110678626	82.9377	-0.999239	0.243387	-4.10555	4.03e-05	0.000506901	AAEL026516
LOC5564363	1296.92	0.295295	0.0719976	4.10145	4.11e-05	0.000515551	AAEL021301
LOC5572962	8666.57	-4.59536	1.12061	-4.10075	4.12e-05	0.000516428	AAEL010180
LOC5572367	375.914	-0.745926	0.181903	-4.10068	4.12e-05	0.000516428	AAEL009756
LOC5580171	288.773	-0.674785	0.164571	-4.10028	4.13e-05	0.000516921	AAEL002546
LOC5565559	103.053	-0.466629	0.113818	-4.09978	4.14e-05	0.000517513	AAEL004843	actin [Source:VB Community Annotation]
LOC110678786	34.98	-1.83841	0.448432	-4.09964	4.14e-05	0.000517513	AAEL023592
LOC5569937	109.75	1.76321	0.430233	4.09827	4.16e-05	0.000520184	AAEL008045	hexamerin 2 beta [Source:VB Community Annotation]
LOC110679073	2.36611	-4.28955	1.04736	-4.09559	4.21e-05	0.000525817	AAEL024603
LOC5577225	135.302	-0.581642	0.142025	-4.09534	4.22e-05	0.000525963	AAEL003146
LOC5575602	31.1218	-1.00421	0.245307	-4.09369	4.25e-05	0.000529311	AAEL011931
LOC5572250	125.299	-0.989646	0.241811	-4.09264	4.26e-05	0.000531275	AAEL009679	secretory Phospholipase A2, putative [Source:VB Community Annotation]
LOC5567396	116.778	0.501412	0.122533	4.09205	4.28e-05	0.000531879	AAEL006053
LOC5573964	1763.88	-0.694045	0.16961	-4.09201	4.28e-05	0.000531879	AAEL010819	vacuolar ATP synthase subunit H [Source:VB Community Annotation]
LOC110674735	222.799	-1.11971	0.273655	-4.0917	4.28e-05	0.000532023	AAEL024086
LOC5575570	51.3087	-3.12244	0.763139	-4.09158	4.28e-05	0.000532023	AAEL002666	AMP dependent ligase [Source:VB Community Annotation]
LOC5575766	374.746	-3.47781	0.85026	-4.09029	4.31e-05	0.000534563	AAEL002725
LOC110676717	16.6827	-2.18589	0.53474	-4.08776	4.36e-05	0.000540007	AAEL023852
LOC110679290	23.5536	1.29712	0.317337	4.08752	4.36e-05	0.000540139	AAEL025399
LOC5571574	1081.11	-0.367746	0.0900135	-4.08545	4.4e-05	0.000544428	AAEL009157	RHO GTPase activator, putative [Source:VB Community Annotation]
LOC5571347	272.748	-1.94529	0.476166	-4.08532	4.4e-05	0.000544428	AAEL009002
LOC5571526	3.81128	-3.31618	0.811775	-4.0851	4.41e-05	0.000544499	AAEL009138	cytochrome P450 [Source:VB Community Annotation]	CYP6N11
LOC5573104	67.8369	-0.562482	0.137759	-4.08308	4.44e-05	0.000548837	AAEL010287
LOC5573292	312.796	0.365855	0.0896308	4.0818	4.47e-05	0.000551416	AAEL010371	autotransporter adhesin precursor, putative [Source:VB Community Annotation]
LOC5572891	111.694	0.673523	0.165021	4.08144	4.48e-05	0.000551851	AAEL010099	4-nitrophenylphosphatase [Source:VB Community Annotation]
LOC5573687	15.4577	1.56815	0.384561	4.07778	4.55e-05	0.000559561	AAEL013348	lethal(2)essential for life protein, l2efl [Source:VB Community Annotation]
LOC5572473	823.742	-0.322155	0.0790048	-4.07766	4.55e-05	0.000559561	AAEL009823
LOC5565859	21.2573	-2.00969	0.492861	-4.07761	4.55e-05	0.000559561	AAEL005034	hemoglobin (heterodimeric), putative [Source:VB Community Annotation]
LOC5568727	62.8189	-1.05384	0.258453	-4.07748	4.55e-05	0.000559561	AAEL026287
LOC5567085	663.148	1.12888	0.276896	4.0769	4.56e-05	0.000560321	AAEL026928
LOC110675394	5.03063	2.35708	0.578169	4.0768	4.57e-05	0.000560321	AAEL024836
LOC5570336	116.931	0.622538	0.152731	4.07605	4.58e-05	0.000561694	AAEL001382	small nuclear ribonucleoprotein sm d1 [Source:VB Community Annotation]
LOC5568297	55.9747	-0.942233	0.231208	-4.07526	4.6e-05	0.000563166	AAEL006726	Innexin [Source:UniProtKB/TrEMBL;Acc:Q174Z8]	inx4
LOC5570984	55.8382	1.15694	0.283928	4.07475	4.61e-05	0.000563674	AAEL020513
LOC5569881	163.016	1.0791	0.26483	4.07469	4.61e-05	0.000563674	AAEL019649
LOC5563776	304.879	0.461667	0.113373	4.0721	4.66e-05	0.000569516	AAEL021771
LOC5576618	53.2258	-1.79758	0.441573	-4.07086	4.68e-05	0.000572126	AAEL012652
LOC5567680	61598.9	-1.33819	0.329012	-4.06732	4.76e-05	0.000580249	AAEL006259	long wavelength sensitive opsin [Source:VB Community Annotation]	GPROP2
LOC110676796	43.2314	-0.699925	0.172102	-4.06691	4.76e-05	0.000580249	AAEL024336
LOC5567371	50.5038	0.668066	0.16427	4.06689	4.76e-05	0.000580249	AAEL006033	Dihydroorotate dehydrogenase (quinone), mitochondrial [Source:UniProtKB/TrEMBL;Acc:Q177S6]
LOC110679172	43.8154	-1.30814	0.32166	-4.06685	4.77e-05	0.000580249	AAEL022514
LOC110681236	113.754	0.442195	0.10877	4.06539	4.8e-05	0.000583421	AAEL020438
LOC5580319	243.405	0.340195	0.0836892	4.06498	4.8e-05	0.000584014	AAEL019792
LOC5566685	234.098	-0.770512	0.189648	-4.06286	4.85e-05	0.000588882	AAEL005581	norepinephrine/norepinephrine transporter [Source:VB Community Annotation]
LOC110675782	100.475	-0.871709	0.214599	-4.06204	4.86e-05	0.000590486	AAEL025123
LOC110680784	475.192	-0.854224	0.21036	-4.06077	4.89e-05	0.000592996	AAEL022092
LOC5567637	228.016	0.412861	0.101673	4.06069	4.89e-05	0.000592996	AAEL006224	short-chain dehydrogenase [Source:VB Community Annotation]
LOC5577441	102.95	-0.485454	0.119631	-4.05791	4.95e-05	0.000599631	AAEL009777	heparan sulphate sulfotransferase [Source:VB Community Annotation]
LOC110679692	379.032	-0.430988	0.10629	-4.05482	5.02e-05	0.000607149	AAEL021284
LOC5577893	3928.78	0.881485	0.217405	4.05458	5.02e-05	0.000607314	AAEL013407	Catalase [Source:UniProtKB/TrEMBL;Acc:Q16J86]	Cat	CAT1B
LOC5568947	68.9447	-0.538384	0.132986	-4.04843	5.16e-05	0.000622999	AAEL007233	zinc finger protein [Source:VB Community Annotation]
LOC5575664	411.089	-0.563065	0.139093	-4.04811	5.16e-05	0.000623361	AAEL002692	Beat protein [Source:UniProtKB/TrEMBL;Acc:A0A1S4F2K6]
LOC5568775	147.541	-0.547866	0.135358	-4.04753	5.18e-05	0.000624426	AAEL007129	defective proboscis extension response, putative [Source:VB Community Annotation]
LOC5563695	538.846	-0.457245	0.112991	-4.04675	5.19e-05	0.000626035	AAEL000549	fibulin 1 and [Source:VB Community Annotation]
LOC5567291	120.903	0.541008	0.133717	4.04592	5.21e-05	0.000627772	AAEL005944	mitochondrial ribosomal protein, S23, putative [Source:VB Community Annotation]	mRpS23
LOC5579875	673.231	-0.666062	0.164643	-4.04548	5.22e-05	0.000628464	AAEL005978
LOC5568646	37.3142	-1.76816	0.43714	-4.04484	5.24e-05	0.000629706	AAEL028234
LOC110675145	6.08286	-1.9767	0.488843	-4.04363	5.26e-05	0.00063249	AAEL023936
LOC5567126	2169.37	-0.542939	0.134278	-4.0434	5.27e-05	0.00063263	AAEL005879	vinculin [Source:VB Community Annotation]
LOC110676781	311.708	-1.54373	0.381863	-4.04263	5.29e-05	0.000634219	AAEL022313
LOC110681118	401.234	1.57601	0.389889	4.04219	5.3e-05	0.000634925	AAEL020799
LOC5571385	62.4601	-0.710236	0.175726	-4.04172	5.31e-05	0.0006357	AAEL009016	glutathione transferase [Source:VB Community Annotation]	GSTT2
LOC5574465	158.291	-3.96057	0.980456	-4.03952	5.36e-05	0.000641216	AAEL011183
LOC5569390	348.188	0.559983	0.138714	4.03696	5.41e-05	0.000647756	AAEL023687
LOC110677847	5.59518	-2.25966	0.559768	-4.03677	5.42e-05	0.000647773	AAEL024032
LOC5573378	15.1872	-1.16835	0.289479	-4.03603	5.44e-05	0.00064933	AAEL010471	choline O-acetyltransferase [Source:VB Community Annotation]	ChAT
LOC110674246	14.7612	-2.41048	0.59741	-4.03489	5.46e-05	0.000651998	AAEL022117
LOC110675601	109.41	-0.621324	0.154009	-4.03434	5.48e-05	0.000653043	AAEL025376
LOC5570305	17.9191	-1.15397	0.286053	-4.0341	5.48e-05	0.000653207	AAEL008256	cyclin A3, putative [Source:VB Community Annotation]
LOC5572580	228.225	1.02799	0.2549	4.0329	5.51e-05	0.000656059	AAEL009899
LOC5570158	410.474	0.575137	0.142635	4.03224	5.52e-05	0.000657404	AAEL008133	GTP-binding protein hflx [Source:VB Community Annotation]
LOC5566286	45.6975	0.87838	0.217864	4.03178	5.54e-05	0.000658169	AAEL000722
LOC110681253	110.911	-1.2774	0.316868	-4.03134	5.55e-05	0.000658922	AAEL021199
LOC5570704	881.564	-1.67211	0.414829	-4.03085	5.56e-05	0.000659783	AAEL022657
LOC5565318	509.077	0.323969	0.0803952	4.02971	5.58e-05	0.00066251	AAEL004733	jun activation domain binding protein [Source:VB Community Annotation]
LOC5568612	98.7787	0.822673	0.204219	4.02839	5.62e-05	0.000665733	AAEL006965	NBP2b protein, putative [Source:VB Community Annotation]
LOC5576287	183.871	0.808662	0.200757	4.02806	5.62e-05	0.000666145	AAEL012439	enoyl-CoA hydratase (enoyl hydrase) (unsaturated acyl-CoA hydratase), putative [Source:VB Community Annotation]
LOC5563699	167.586	-2.58311	0.641599	-4.02606	5.67e-05	0.000671339	AAEL000545
LOC5569819	1387.52	-2.02465	0.503031	-4.0249	5.7e-05	0.000674043	AAEL001308	CRAL/TRIO domain-containing protein [Source:VB Community Annotation]
LOC110679370	64.7538	-0.978778	0.243189	-4.02476	5.7e-05	0.000674043	AAEL027185
LOC5577919	172.773	-0.671322	0.166828	-4.02403	5.72e-05	0.00067563	AAEL003344	metaxin [Source:VB Community Annotation]
LOC5566934	296.862	0.599352	0.148987	4.02285	5.75e-05	0.000678173	AAEL005706	triacylglycerol lipase [Source:VB Community Annotation]
LOC23687488	25.6892	-0.958732	0.23833	-4.02271	5.75e-05	0.000678173	AAEL027822
LOC110677055	289.287	-0.503987	0.125288	-4.02261	5.76e-05	0.000678173	AAEL020006
LOC5579290	172.959	0.519742	0.129233	4.02174	5.78e-05	0.000680173	AAEL001544
LOC110679315	26.4025	-1.90209	0.473013	-4.02122	5.79e-05	0.000681165	AAEL028001
CFI06_mgt04	24.3831	1.17327	0.291817	4.02058	5.81e-05	0.000682513
LOC110681370	105.146	-0.587293	0.146102	-4.01973	5.83e-05	0.000684449	AAEL022008
LOC5571977	192.809	-0.348633	0.0867369	-4.01943	5.83e-05	0.000684808	AAEL021953
LOC5577356	2716.33	-0.728202	0.181195	-4.01888	5.85e-05	0.0006853	AAEL000417	monocarboxylate transporter [Source:VB Community Annotation]
LOC5568651	132.217	0.630942	0.157	4.01874	5.85e-05	0.0006853	AAEL006984	cytochrome P450 [Source:VB Community Annotation]	CYP6AG5
LOC110679144	4.93021	-3.08404	0.767421	-4.0187	5.85e-05	0.0006853	AAEL022864
LOC5574730	416.905	-2.50271	0.622788	-4.01856	5.86e-05	0.0006853	AAEL011368	sugar transporter [Source:VB Community Annotation]
LOC5567168	2973.36	-0.447893	0.111506	-4.01676	5.9e-05	0.000690041	AAEL005895
LOC5572032	70.552	0.548632	0.136695	4.01355	5.98e-05	0.000698444	AAEL000230
LOC5571026	139.519	-0.47453	0.118232	-4.01355	5.98e-05	0.000698444	AAEL008758	F-box/SPRY domain-containing protein 1 [Source:VB Community Annotation]
LOC5569882	245.354	-1.23677	0.308271	-4.01197	6.02e-05	0.00070262	AAEL026517
LOC5573827	21913.5	-0.268785	0.0670061	-4.01135	6.04e-05	0.000703935	AAEL010756	40S ribosomal protein S19 [Source:UniProtKB/TrEMBL;Acc:Q1HRR8]	RpS19
LOC110678681	2.6282	-3.83595	0.956427	-4.01071	6.05e-05	0.000705326	AAEL025908
LOC5573169	1682.62	-3.8793	0.968039	-4.00738	6.14e-05	0.000714803	AAEL002022	protein serine/threonine kinase, putative [Source:VB Community Annotation]
LOC5569014	1765.05	-0.374525	0.0934643	-4.00715	6.15e-05	0.000714986	AAEL007288	dynamin [Source:VB Community Annotation]
LOC5575390	1184.66	-1.78643	0.4459	-4.00636	6.17e-05	0.000716847	AAEL019507
LOC5567894	197.475	-0.591914	0.147834	-4.00392	6.23e-05	0.000723741	AAEL018118
LOC5579939	457.674	-0.448955	0.112158	-4.00287	6.26e-05	0.000726415	AAEL019925	Guanylate cyclase [Source:UniProtKB/TrEMBL;Acc:Q174S2]
LOC5569019	33.1419	-1.39659	0.348945	-4.00234	6.27e-05	0.000727236	AAEL024330
LOC5572995	351.463	0.466888	0.116656	4.00226	6.27e-05	0.000727236	AAEL001936
LOC5578481	22.1122	2.20739	0.551584	4.00191	6.28e-05	0.000727762	AAEL000495	glutathione peroxidase [Source:VB Community Annotation]	GPXH3
LOC110679079	4047.33	1.47476	0.368544	4.00158	6.29e-05	0.000728238	AAEL025584
LOC5570139	30871.6	-0.289733	0.0724135	-4.00109	6.31e-05	0.000728677	AAEL008103	40S ribosomal protein S8 [Source:UniProtKB/TrEMBL;Acc:Q1HRQ9]	RpS8
LOC5577597	2.34677	-4.17535	1.0436	-4.00092	6.31e-05	0.000728677	AAEL003241
LOC5564646	86.3628	-1.75605	0.438916	-4.00088	6.31e-05	0.000728677	AAEL026727
LOC5571228	46.6365	-1.40715	0.351722	-4.00074	6.31e-05	0.000728677	AAEL008931	inward-rectifying potassium channel [Source:VB Community Annotation]	Kir2B	Irk2
LOC5574519	115.057	0.4639	0.116001	3.99909	6.36e-05	0.000733164	AAEL011192	vacuolar sorting protein vps29 [Source:VB Community Annotation]
LOC5570550	287.29	0.347104	0.0867991	3.99894	6.36e-05	0.000733164	AAEL008363	transcription initiation factor TFIID subunit 12 [Source:VB Community Annotation]
LOC110680819	174.585	0.564391	0.141206	3.99692	6.42e-05	0.000737996	AAEL025019
LOC5572524	11.936	3.19482	0.799322	3.99691	6.42e-05	0.000737996	AAEL023271
LOC5574790	1623.83	0.56588	0.141581	3.99686	6.42e-05	0.000737996	AAEL002463
LOC5567426	60.2954	0.678529	0.169803	3.99597	6.44e-05	0.000740229	AAEL006067
LOC5575196	459.161	-0.421289	0.105448	-3.99523	6.46e-05	0.000742008	AAEL019921
LOC23687938	179.876	-0.770607	0.192908	-3.99468	6.48e-05	0.000743175	AAEL013633	ubiquitin-conjugating enzyme h [Source:VB Community Annotation]
LOC110676188	2031.96	-4.20698	1.05369	-3.99261	6.54e-05	0.000748959	AAEL024549
LOC5574636	587.795	-0.562608	0.140916	-3.9925	6.54e-05	0.000748959	AAEL011273	uridine cytidine kinase i [Source:VB Community Annotation]	ucdk1
LOC5569381	673.524	-1.98244	0.496625	-3.99182	6.56e-05	0.000750575	AAEL007582	granzyme A precursor, putative [Source:VB Community Annotation]
CFI06_mgr01	63.8718	-0.620878	0.155561	-3.99122	6.57e-05	0.000751904
LOC5570118	758.066	-1.62087	0.40616	-3.99072	6.59e-05	0.000752957	AAEL008096	mitochondrial ornithine transporter [Source:VB Community Annotation]
LOC110675377	27.2081	-1.22877	0.308028	-3.98916	6.63e-05	0.00075736	AAEL020046
LOC5571312	1684.97	-0.691812	0.17346	-3.98831	6.65e-05	0.000759544	AAEL019533
LOC5571583	1818.86	-0.475907	0.119369	-3.98685	6.7e-05	0.000763664	AAEL020822
LOC5576920	76.1025	-0.610749	0.153239	-3.98561	6.73e-05	0.000767108	AAEL012868	cmp-n-acetylneuraminic acid synthase [Source:VB Community Annotation]
LOC5565994	362.764	0.307758	0.0772229	3.98532	6.74e-05	0.000767492	AAEL015041	mitochondrial carrier [Source:VB Community Annotation]
LOC5566220	299.456	0.732164	0.183731	3.98498	6.75e-05	0.000768019	AAEL005270
LOC5572128	2.98348	3.59112	0.901254	3.98458	6.76e-05	0.000768769	AAEL009528
LOC5577996	12468.5	-0.313455	0.078695	-3.98316	6.8e-05	0.000772822	AAEL003396	60S ribosomal protein L32 [Source:UniProtKB/TrEMBL;Acc:Q1HR34]	RpL32	rp49
LOC5564534	454.6	0.340188	0.0854208	3.9825	6.82e-05	0.000774045	AAEL025656
LOC5567355	642.791	-0.953096	0.239325	-3.98244	6.82e-05	0.000774045	AAEL023266
LOC5580248	212.155	-0.767121	0.192648	-3.98199	6.83e-05	0.00077481	AAEL019691	Short neuropeptide F [Source:UniProtKB/Swiss-Prot;Acc:A0SIX6]	sNPF
LOC5574866	27183.1	-0.282541	0.0709571	-3.98186	6.84e-05	0.00077481	AAEL011471	60S ribosomal protein L17 [Source:UniProtKB/Swiss-Prot;Acc:Q1HR65]	RpL17
LOC5563854	42.2991	-0.849687	0.213448	-3.98076	6.87e-05	0.000777824	AAEL014180
LOC5573593	1232.67	-0.820362	0.206139	-3.97966	6.9e-05	0.000780438	AAEL002088	sodium channel, auxiliary protein, putative [Source:VB Community Annotation]
LOC5572373	94.685	-0.640694	0.160994	-3.97962	6.9e-05	0.000780438	AAEL009761
LOC5575820	75.5146	0.706973	0.177719	3.97804	6.95e-05	0.000785078	AAEL012093	leucine-rich transmembrane protein [Source:VB Community Annotation]
LOC5577033	108.041	-1.08514	0.272952	-3.97558	7.02e-05	0.000792667	AAEL012947
LOC110680818	174.154	0.567787	0.142885	3.97373	7.08e-05	0.000798269	AAEL023687
LOC5572895	55.4008	-0.940548	0.236727	-3.97313	7.09e-05	0.000798944	AAEL020150
LOC110676534	18.2533	-1.40939	0.354733	-3.9731	7.09e-05	0.000798944	AAEL024015
LOC5563684	146.542	-0.449572	0.113156	-3.97302	7.1e-05	0.000798944	AAEL000536
LOC5580307	290.233	-0.744705	0.187461	-3.97259	7.11e-05	0.000799819	AAEL003018
LOC5578653	173.96	-0.76262	0.191988	-3.97223	7.12e-05	0.000800435	AAEL020162
LOC5568042	21.9513	-3.34868	0.843358	-3.97065	7.17e-05	0.00080518	AAEL006481
LOC110678861	124.83	-0.728787	0.183589	-3.96966	7.2e-05	0.000807981	AAEL025889
LOC5565987	121.092	-0.543866	0.137013	-3.96945	7.2e-05	0.000808094	AAEL019467
LOC5568441	6535.12	-1.22521	0.308709	-3.96881	7.22e-05	0.000809688	AAEL006872	calponin/transgelin [Source:VB Community Annotation]
LOC5568592	20.4126	-1.17628	0.296437	-3.96805	7.25e-05	0.000811686	AAEL001123
LOC110676232	28083.3	-0.310341	0.0782425	-3.9664	7.3e-05	0.000816743	AAEL023983	40S ribosomal protein S4 [Source:UniProtKB/TrEMBL;Acc:Q1HRS6]
LOC5574845	182.565	-2.65577	0.669772	-3.96518	7.33e-05	0.000820369	AAEL011460
LOC5571743	407.8	-0.674849	0.170274	-3.96332	7.39e-05	0.000826189	AAEL020482
LOC5564977	185.218	0.388733	0.098116	3.96198	7.43e-05	0.000830263	AAEL004515
LOC5571697	135.993	0.417417	0.105366	3.9616	7.44e-05	0.00083098	AAEL003354
LOC5575071	139.086	-1.88137	0.474944	-3.96125	7.46e-05	0.000831612	AAEL011624	granzyme A precursor, putative [Source:VB Community Annotation]
LOC5579485	891.881	0.519705	0.131205	3.96101	7.46e-05	0.000831846	AAEL011012	Septin [Source:UniProtKB/TrEMBL;Acc:A0A1S4FS27]
LOC5574795	11.0662	-1.30588	0.329745	-3.96028	7.49e-05	0.000833788	AAEL002472
LOC5576488	262.977	-0.518045	0.130864	-3.95867	7.54e-05	0.000838858	AAEL002900
LOC110676531	6.99664	2.36389	0.597311	3.95755	7.57e-05	0.00084218	AAEL021436
LOC5569285	976.272	0.353805	0.0894234	3.95652	7.61e-05	0.000845235	AAEL019758
LOC5565320	82.5874	-1.29995	0.328633	-3.95563	7.63e-05	0.000847787	AAEL004713
LOC5567899	247.742	-0.543407	0.1374	-3.95494	7.66e-05	0.000849233	AAEL006352
LOC110678894	194.166	-0.490061	0.123916	-3.9548	7.66e-05	0.000849233	AAEL024857
LOC5571124	446.429	0.896241	0.226626	3.95471	7.66e-05	0.000849233	AAEL021581
LOC5572805	94.6517	0.716033	0.181099	3.95381	7.69e-05	0.00085184	AAEL001900	lactosylceramide 4-alpha-galactosyltransferase (alpha- 1,4-galactosyltransferase) [Source:VB Community Annotation]
LOC110676971	2.72422	-3.12861	0.791592	-3.95231	7.74e-05	0.000856611	AAEL023351
LOC5569107	28.6097	1.35997	0.344162	3.95153	7.77e-05	0.000858774	AAEL007371
LOC5571734	30.0816	-0.781483	0.197799	-3.9509	7.79e-05	0.000860455	AAEL022163
LOC5577711	16.4796	1.27133	0.321828	3.95033	7.8e-05	0.000861378	AAEL013346	lethal(2)essential for life protein, l2efl [Source:VB Community Annotation]
LOC5578565	29.1427	-1.20336	0.304625	-3.9503	7.81e-05	0.000861378	AAEL013752	Rfx5 [Source:UniProtKB/TrEMBL;Acc:A0A1S4G0A6]
LOC5564127	5.81756	-2.13433	0.540398	-3.94956	7.83e-05	0.000863464	AAEL004105	neuroglobin, putative [Source:VB Community Annotation]
LOC110678987	113.906	-0.881959	0.223336	-3.94903	7.85e-05	0.000864771	AAEL024524
LOC110680850	85.9146	-0.697834	0.176786	-3.94734	7.9e-05	0.000870266
LOC5573576	45.8664	-0.695559	0.17626	-3.94622	7.94e-05	0.000873732	AAEL002104
LOC5577380	880.259	0.592262	0.150105	3.94565	7.96e-05	0.000875212	AAEL000415	AMP dependent coa ligase [Source:VB Community Annotation]
LOC5573748	97.1081	-2.35399	0.596651	-3.94534	7.97e-05	0.000875718	AAEL000298	sodium/chloride dependent amino acid transporter [Source:VB Community Annotation]
LOC5571162	278.991	0.539872	0.136844	3.94517	7.97e-05	0.00087574	AAEL008874
LOC5574550	133.685	-0.998471	0.253174	-3.94382	8.02e-05	0.000880061	AAEL019838
LOC5573930	444.392	1.53204	0.388779	3.94066	8.13e-05	0.000891123
LOC5577292	362.933	-0.408237	0.103606	-3.94028	8.14e-05	0.000891902	AAEL013143
LOC110674651	2.28363	3.91451	0.993595	3.93975	8.16e-05	0.000893252	AAEL027445
LOC110678425	5.35981	2.11559	0.537512	3.93589	8.29e-05	0.000907088	AAEL021526
LOC5570968	238.044	-0.447859	0.113811	-3.93512	8.32e-05	0.000909367	AAEL008700
LOC5573193	93.6713	0.705354	0.179436	3.93094	8.46e-05	0.000924679	AAEL002019
LOC5571700	107.922	-0.899475	0.228874	-3.92999	8.49e-05	0.000927678	AAEL009227	kinesin heavy chain [Source:VB Community Annotation]
LOC5572566	289.654	-2.8883	0.735193	-3.92864	8.54e-05	0.000932287	AAEL009888	sodium-coupled cation-chloride cotransporter [Source:VB Community Annotation]	CCC2
LOC5579421	45.1986	-2.09442	0.533359	-3.92685	8.61e-05	0.000938563	AAEL024490
LOC5573386	2382.1	-0.781597	0.199092	-3.92581	8.64e-05	0.000941414	AAEL002055	neuroendocrine protein 7b2 [Source:VB Community Annotation]
LOC5578284	38.922	-0.972442	0.247706	-3.92579	8.64e-05	0.000941414	AAEL023810
LOC5577938	674.681	-0.756302	0.19275	-3.92375	8.72e-05	0.000948705	AAEL013424
LOC5567125	115.086	0.475493	0.121188	3.9236	8.72e-05	0.000948705	AAEL005882
LOC5564404	2108.68	-2.63534	0.6717	-3.92339	8.73e-05	0.000948876	AAEL004242	juvenile hormone-inducible protein, putative [Source:VB Community Annotation]
LOC5577997	257.654	-0.386474	0.0985213	-3.92275	8.75e-05	0.000950735	AAEL003385
LOC5574930	276.724	0.553041	0.141043	3.9211	8.81e-05	0.000956146	AAEL011536	phosphoglucomutase [Source:VB Community Annotation]
LOC110675097	7.56646	-1.95108	0.497634	-3.92071	8.83e-05	0.000956146	AAEL026557
LOC110676680	7.56646	-1.95108	0.497634	-3.92071	8.83e-05	0.000956146	AAEL026191
LOC110676726	7.56646	-1.95108	0.497634	-3.92071	8.83e-05	0.000956146	AAEL025142
LOC5578573	95.1784	1.94017	0.494912	3.92024	8.85e-05	0.000957377	AAEL013757	hexamerin 2 beta [Source:VB Community Annotation]
LOC110678979	11.054	-2.00259	0.510917	-3.91961	8.87e-05	0.000959229	AAEL026887
LOC110675486	74.5783	-1.69375	0.432204	-3.91886	8.9e-05	0.000961534	AAEL022202
LOC5571379	137.496	0.783732	0.200001	3.91864	8.9e-05	0.000961751	AAEL026486
LOC5566450	410.456	0.450092	0.114883	3.91782	8.94e-05	0.000964356	AAEL005391	syntenin [Source:VB Community Annotation]
LOC5566179	1053.69	-1.31015	0.334438	-3.91746	8.95e-05	0.000965151	AAEL015077	WD and tetratricopeptide repeat protein [Source:VB Community Annotation]
LOC110680424	33.5296	-1.77277	0.452739	-3.91565	9.02e-05	0.000971753	AAEL026213
LOC110674709	433.531	-0.75058	0.191745	-3.91448	9.06e-05	0.000975812	AAEL022538	Putative bisphosphate 3'-nucleotidase bpnt1/inositol polyphosphate 1-phosphatase [Source:UniProtKB/TrEMBL;Acc:A0A0P6IYC3]
LOC5576198	159.254	0.68892	0.176005	3.91421	9.07e-05	0.000976199	AAEL012390
LOC5564720	1086.58	-1.84106	0.470644	-3.91179	9.16e-05	0.000985387	AAEL004409	yellow protein, putative [Source:VB Community Annotation]
LOC5572460	185.062	-0.714795	0.182772	-3.91086	9.2e-05	0.000988481	AAEL001812	organic anion transporter [Source:VB Community Annotation]
LOC5570236	54.3632	-0.753412	0.192655	-3.91069	9.2e-05	0.000988537	AAEL008161	abnormal oocyte, putative [Source:VB Community Annotation]
LOC5571859	1335.49	-2.32567	0.594738	-3.91041	9.21e-05	0.000988992	AAEL009338	C-Type Lectin (CTL). [Source:VB Community Annotation]	CTL10
LOC5578213	57.1256	-0.715141	0.182955	-3.90884	9.27e-05	0.000994774	AAEL018302
LOC5577603	6.01584	-2.5668	0.656981	-3.90697	9.35e-05	0.00100149	AAEL029009
LOC110674003	306.492	0.435619	0.111501	3.90688	9.35e-05	0.00100149	AAEL007884	conserved membrane protein at 44E, putative [Source:VB Community Annotation]
LOC5574612	743.473	-0.306026	0.0783503	-3.90586	9.39e-05	0.00100501	AAEL011255	GTP-binding protein-invertebrate [Source:VB Community Annotation]
LOC5567018	56.994	-1.31863	0.337718	-3.90453	9.44e-05	0.00100988	AAEL018352
LOC5576007	792.23	-0.570739	0.1462	-3.90381	9.47e-05	0.0010121	AAEL021113
LOC110674451	3.33238	3.46955	0.888792	3.90367	9.47e-05	0.0010121	AAEL020331
LOC5566143	1781.44	0.651788	0.166984	3.90329	9.49e-05	0.001013	AAEL005213	Putative amino acid transporter [Source:UniProtKB/TrEMBL;Acc:A0A0P6J1D0]
LOC110677903	4.02944	-2.43685	0.624459	-3.90233	9.53e-05	0.00101568	AAEL024323
LOC110677912	1.99938	-4.55886	1.16824	-3.90232	9.53e-05	0.00101568	AAEL020549
LOC5570079	135.555	-0.444901	0.114036	-3.90142	9.56e-05	0.00101844	AAEL001332
LOC5567758	385.552	0.408801	0.104785	3.90133	9.57e-05	0.00101844	AAEL000128	P130 [Source:VB Community Annotation]
LOC5574706	548.838	-0.977234	0.250541	-3.90049	9.6e-05	0.00102131	AAEL011347
LOC5575787	125.908	-0.73232	0.187801	-3.89944	9.64e-05	0.00102454	AAEL019844
LOC5574569	177.532	0.572349	0.146788	3.89916	9.65e-05	0.00102454	AAEL011239	short-chain dehydrogenase [Source:VB Community Annotation]
LOC5568537	487.717	0.299302	0.076762	3.8991	9.66e-05	0.00102454	AAEL006958	Cell adhesion molecule [Source:UniProtKB/TrEMBL;Acc:A0A1S4FFB1]
LOC110681468	23.1618	-0.966869	0.247974	-3.89907	9.66e-05	0.00102454	AAEL025776
LOC5572567	115.04	-0.506108	0.129826	-3.89836	9.68e-05	0.00102685	AAEL009892
LOC5570781	483.468	-2.48576	0.63773	-3.89783	9.71e-05	0.00102841	AAEL008527	Zinc metalloprotease [Source:UniProtKB/TrEMBL;Acc:A0A1S4FK06]
LOC5571506	251.689	-0.425935	0.1093	-3.89693	9.74e-05	0.00103154	AAEL019988
LOC5571605	141.512	-0.549231	0.140971	-3.89606	9.78e-05	0.00103455	AAEL009191	adenosine deaminase [Source:VB Community Annotation]
LOC110676217	346.304	-1.92137	0.493287	-3.89503	9.82e-05	0.00103823	AAEL022073
LOC5577754	14.2259	-1.22335	0.314102	-3.89475	9.83e-05	0.00103829	AAEL018298
LOC5576187	217.943	-0.398233	0.10225	-3.89469	9.83e-05	0.00103829	AAEL012384	amalgam protein, putative [Source:VB Community Annotation]
LOC110680404	639.925	-0.817024	0.20984	-3.89356	9.88e-05	0.00104244	AAEL024119
LOC110676099	38.7963	-0.767549	0.197181	-3.89262	9.92e-05	0.00104581	AAEL024199
LOC5578729	813.279	0.518722	0.13329	3.89167	9.96e-05	0.00104919	AAEL013844	diazepam binding inhibitor, putative [Source:VB Community Annotation]
LOC5570432	15650.4	-0.31279	0.0803885	-3.89098	9.98e-05	0.00105149	AAEL008329	60S ribosomal protein L24 [Source:UniProtKB/TrEMBL;Acc:Q1HR85]	RpL24
LOC110678645	8.08083	-1.80288	0.463397	-3.89057	0.000100009	0.00105254	AAEL025962
LOC5570080	670.179	0.279022	0.0717211	3.89038	0.000100086	0.00105265	AAEL001336	charged multivesicular body protein 2a [Source:VB Community Annotation]
LOC5566772	15837.2	-0.28424	0.0730985	-3.88845	0.000100886	0.00106024	AAEL005629	60S ribosomal protein L35, putative [Source:VB Community Annotation]	RpL7a
LOC5571289	2516.36	0.499104	0.12836	3.88831	0.000100943	0.00106024	AAEL019546
LOC5570130	100.222	1.07774	0.277188	3.88813	0.000101021	0.00106035	AAEL008116
LOC5568081	1931.51	-0.755263	0.19426	-3.88789	0.000101117	0.00106065	AAEL006516	vacuolar ATP synthase subunit h [Source:VB Community Annotation]
LOC5565824	277.171	0.309318	0.0796146	3.88519	0.00010225	0.00107047	AAEL019642
LOC5576254	277.171	0.309318	0.0796146	3.88519	0.00010225	0.00107047	AAEL019643
LOC5580249	367.708	0.500565	0.12884	3.88515	0.000102266	0.00107047	AAEL012548	glycosylphosphatidylinositol-specific phospholipase C, putative [Source:VB Community Annotation]
LOC5578129	650.62	-3.83253	0.986492	-3.88501	0.000102327	0.00107047	AAEL013511
LOC5566200	144.585	-0.561427	0.144577	-3.88322	0.00010308	0.00107763	AAEL005243
LOC5568466	362.893	-1.12667	0.290158	-3.88295	0.000103197	0.00107813	AAEL006881	multiple C2 domain and transmembrane region protein, putative [Source:VB Community Annotation]
LOC5570552	728.081	0.385534	0.09932	3.88173	0.000103714	0.00108281	AAEL008370	Class B Scavenger Receptor (CD36 domain). [Source:VB Community Annotation]	SCRB17
LOC110677269	24.511	-1.1506	0.296441	-3.88138	0.000103864	0.00108366	AAEL021050
LOC5567119	270.847	-1.33043	0.342938	-3.87952	0.000104664	0.00109128	AAEL022263
LOC110674500	2.34783	-4.29552	1.10749	-3.87861	0.000105054	0.00109461	AAEL020053
LOC5574278	339.35	-3.80883	0.982093	-3.87828	0.000105199	0.00109539	AAEL011035
LOC5575785	45.4939	-4.57192	1.17904	-3.87765	0.000105471	0.0010975	AAEL024006
LOC5574976	976.431	0.370861	0.0956592	3.8769	0.000105798	0.00110017	AAEL002501	protein disulfide isomerase [Source:VB Community Annotation]
LOC110679058	16.0321	1.03578	0.26721	3.87629	0.000106062	0.00110219	AAEL021178
LOC5573900	180.987	-1.35814	0.350425	-3.87571	0.000106316	0.00110389	AAEL002192	M12 mutant protein precursor, putative [Source:VB Community Annotation]
LOC5566810	371.779	1.07475	0.277313	3.87559	0.000106367	0.00110389	AAEL005659
LOC5571996	2820.05	1.22397	0.316001	3.8733	0.000107369	0.00111356	AAEL009484
LOC110678433	4.57854	-2.27705	0.587974	-3.87271	0.000107631	0.00111554	AAEL026145	pickpocket 307 [Source:VB Community Annotation]	ppk307
LOC110674146	51.8939	-0.618689	0.159772	-3.87231	0.000107808	0.00111663	AAEL023247
LOC5575342	397.576	-3.03601	0.7841	-3.87197	0.000107957	0.00111743	AAEL002587	odorant binding protein OBP11 [Source:VB Community Annotation]	OBP11
LOC110679166	98.7759	-0.659933	0.170517	-3.87018	0.000108755	0.00112495	AAEL021576
LOC5570492	241.278	0.361991	0.0935777	3.86834	0.000109578	0.00113271	AAEL021977
LOC5572850	194.094	-0.592956	0.153405	-3.8653	0.000110952	0.00114616	AAEL010076
LOC5575660	27.4495	-1.52466	0.394513	-3.86467	0.00011124	0.00114812	AAEL002689
LOC5566065	161.624	0.547118	0.141573	3.86456	0.000111288	0.00114812	AAEL005146
LOC5571643	65.8954	0.535124	0.138558	3.86209	0.000112423	0.00115864	AAEL001653	fetal globin-inducing factor [Source:VB Community Annotation]
LOC5565693	257.884	-0.915167	0.236966	-3.86202	0.000112455	0.00115864	AAEL014216
LOC110679152	20.7918	1.25909	0.326077	3.86134	0.000112769	0.00116111	AAEL023607
LOC5578624	214.995	-0.554372	0.143586	-3.86091	0.000112965	0.00116236	AAEL003597	leucine-rich transmembrane protein [Source:VB Community Annotation]
LOC5570081	20.7779	-1.19355	0.309241	-3.8596	0.000113572	0.00116784	AAEL019483
LOC5572132	328.191	0.409894	0.106213	3.85916	0.000113779	0.0011692	AAEL009547	NAD dehydrogenase [Source:UniProtKB/TrEMBL;Acc:A0A1S4FMS9]
LOC5574103	8.62678	-1.47058	0.381114	-3.85863	0.000114023	0.00117095	AAEL025785
LOC5565659	685.417	1.80227	0.467096	3.85846	0.000114104	0.00117101	AAEL004903
LOC5568786	215.814	0.418563	0.108492	3.858	0.000114318	0.00117243	AAEL007137
LOC5572767	780.733	0.704155	0.182654	3.85512	0.000115673	0.00118556	AAEL026439
LOC5575794	25.8396	-1.04309	0.270625	-3.85438	0.000116023	0.00118836	AAEL012060	PBAN-type neuropeptides Precursor (Pheromone/pyrokinin biosynthesis-activating neuropeptide) [Source:VB Community Annotation]
LOC5566967	414.575	-1.79576	0.466122	-3.85255	0.000116892	0.0011959	AAEL005747
LOC5576997	43.5915	-2.65876	0.690137	-3.85251	0.000116912	0.0011959	AAEL020717
LOC5579836	73.432	0.664859	0.17259	3.85224	0.000117043	0.00119647	AAEL005868
LOC5573252	112.631	0.545876	0.141732	3.85147	0.000117411	0.00119898	AAEL010339
LOC5565368	3006.39	-0.53186	0.138095	-3.8514	0.000117442	0.00119898	AAEL004768
LOC5576462	165.683	-0.469708	0.121979	-3.85074	0.000117759	0.00120144	AAEL002896
LOC5578159	4338.16	-0.879304	0.228374	-3.85027	0.000117987	0.00120298	AAEL013535	phosrestin ii (arrestin a) (arrestin 1) [Source:VB Community Annotation]
LOC5574254	47.1776	-1.75571	0.456267	-3.84799	0.000119089	0.00121156	AAEL023307
LOC5579985	9.05939	2.09758	0.545124	3.8479	0.000119137	0.00121156	AAEL001743	pupal cuticle protein 78E, putative [Source:VB Community Annotation]
LOC110678046	1.48665	-4.16033	1.08122	-3.84782	0.000119176	0.00121156	AAEL024068
LOC110679218	1.93893	-4.04354	1.05093	-3.84758	0.000119293	0.00121156	AAEL025639
LOC110679239	1.93893	-4.04354	1.05093	-3.84758	0.000119293	0.00121156	AAEL023111
LOC110679453	1.93893	-4.04354	1.05093	-3.84758	0.000119293	0.00121156	AAEL020971
LOC5569344	126.178	-0.684207	0.177849	-3.84713	0.00011951	0.00121298	AAEL007544	serine/threonine-protein kinase chk2 (cds1) [Source:VB Community Annotation]
LOC5571993	111.189	-1.03074	0.268005	-3.84596	0.000120082	0.0012179	AAEL009479	amino acid transporter [Source:VB Community Annotation]
LOC110679872	7.78154	-1.9552	0.508414	-3.84568	0.00012022	0.0012179	AAEL026608
LOC5567466	1738.24	0.526475	0.136904	3.84559	0.000120262	0.0012179	AAEL000958
LOC5575239	154.611	-0.413412	0.107505	-3.8455	0.000120306	0.0012179	AAEL011714
LOC5569564	2924.27	-0.465185	0.120982	-3.84509	0.000120508	0.00121916	AAEL025134
LOC5578018	19.5344	-1.10805	0.288223	-3.84442	0.000120838	0.00122171	AAEL003382	Ro ribonucleoprotein autoantigen, putative [Source:VB Community Annotation]
LOC5576888	16.8632	-1.41283	0.367695	-3.8424	0.000121837	0.00123101	AAEL026862
LOC5566045	105.202	-0.439886	0.114496	-3.84192	0.000122075	0.00123196	AAEL005145
LOC5564851	155.922	-0.93987	0.244643	-3.8418	0.000122137	0.00123196	AAEL000604
LOC5564067	12.9417	-1.45949	0.379905	-3.84174	0.000122166	0.00123196	AAEL021479
LOC5572333	42.9516	0.700783	0.18249	3.84012	0.000122975	0.00123859	AAEL009722	clip-domain serine protease, putative [Source:VB Community Annotation]
LOC5575426	342.16	-0.915989	0.238549	-3.83984	0.000123116	0.00123859	AAEL024454
LOC110676775	415.092	0.992384	0.258447	3.8398	0.000123133	0.00123859	AAEL023579
LOC110679654	5450.5	-1.55338	0.404549	-3.83979	0.00012314	0.00123859	AAEL021163
LOC5568671	1839.2	-0.516483	0.134525	-3.83931	0.000123381	0.00124022	AAEL023712
LOC5568823	35.2892	0.878372	0.228827	3.83858	0.000123749	0.00124312	AAEL001162
LOC5568587	461.893	0.242079	0.063088	3.83716	0.000124464	0.00124951	AAEL001112
LOC110678327	5.88143	2.13407	0.556458	3.83509	0.000125518	0.00125878	AAEL025015
LOC5575163	144.21	0.970424	0.253042	3.83503	0.000125549	0.00125878	AAEL021602
LOC5575938	2524.62	-0.269182	0.0702251	-3.83313	0.000126521	0.00126767	AAEL022729
LOC5570787	283.891	-1.35148	0.352591	-3.83299	0.000126597	0.00126767	AAEL008559	glutaminase [Source:VB Community Annotation]
LOC5577226	255.961	-0.438793	0.114513	-3.83182	0.0001272	0.0012729	AAEL018294
LOC5573074	3713.6	-4.81808	1.25866	-3.82793	0.000129225	0.00129231	AAEL010269	venom allergen [Source:VB Community Annotation]
LOC5574617	23.1339	-0.919362	0.240182	-3.82778	0.000129306	0.00129231	AAEL011253	rho-GTPase-activating protein [Source:VB Community Annotation]
LOC5570613	313.723	-2.30377	0.601901	-3.82749	0.000129455	0.00129298	AAEL008424	sodium/chloride dependent amino acid transporter [Source:VB Community Annotation]
LOC5579169	143.103	-0.415666	0.108672	-3.82495	0.000130799	0.00130558	AAEL003885
LOC5577806	87.7914	-0.706375	0.18475	-3.82341	0.00013162	0.00131293	AAEL013388
LOC5569551	451.512	-0.424094	0.110939	-3.82276	0.000131968	0.00131556	AAEL024540
LOC5577564	307.25	-4.10288	1.07366	-3.82141	0.00013269	0.00132192	AAEL013276	acid phosphatase [Source:VB Community Annotation]
LOC5577641	60.5587	-1.31787	0.344886	-3.82117	0.000132817	0.00132235	AAEL024943
LOC5577708	1839.47	-2.33602	0.611391	-3.82083	0.000133003	0.00132336	AAEL010659	lethal(2)essential for life protein, l2efl [Source:VB Community Annotation]
LOC5579300	139.768	-0.984437	0.257721	-3.81977	0.000133575	0.0013282	AAEL003378	GPCR Orphan/Putative Class A Family [Source:UniProtKB/TrEMBL;Acc:A0A1S4F4M7]	GPRNNA1
LOC5568540	1627.7	-0.496204	0.12991	-3.8196	0.000133667	0.00132828	AAEL006948	tomosyn [Source:VB Community Annotation]
LOC5574293	157.559	-0.565507	0.148072	-3.81914	0.000133919	0.00132993	AAEL021092
LOC110677910	6.02739	-2.16413	0.566721	-3.81869	0.000134162	0.00133151	AAEL020184
LOC5573732	30596.4	-0.747625	0.195857	-3.81719	0.000134978	0.00133876	AAEL000291	V-type proton ATPase 16 kDa proteolipid subunit [Source:UniProtKB/Swiss-Prot;Acc:O16110]
LOC5569127	68.1364	-0.518294	0.135836	-3.81559	0.000135858	0.00134664	AAEL007386
LOC5566462	1013.07	0.295741	0.077545	3.81379	0.00013685	0.00135561	AAEL005419	twinfilin [Source:VB Community Annotation]	twf
LOC110679181	25.0532	0.953578	0.250049	3.81357	0.000136975	0.00135599	AAEL025896
LOC5573042	3.64721	-2.61662	0.686184	-3.81329	0.000137129	0.00135666	AAEL026479
LOC5570450	294.701	-1.71456	0.449688	-3.81278	0.000137411	0.00135859	AAEL008342	monocarboxylate transporter [Source:VB Community Annotation]
LOC5566539	33.3396	-0.805111	0.211177	-3.81249	0.000137575	0.00135935	AAEL005473
LOC5569335	2804.73	-3.20475	0.840745	-3.8118	0.00013796	0.00136169	AAEL007542	glutamate decarboxylase [Source:VB Community Annotation]
LOC5579529	29.7827	-2.56886	0.673931	-3.81175	0.000137985	0.00136169	AAEL013856
LOC5573473	385.848	0.42463	0.111432	3.81067	0.000138593	0.00136682	AAEL010514	aminoacyl-tRNA synthetase auxiliary protein, 43kD, putative [Source:VB Community Annotation]
LOC5578774	84.9392	1.1174	0.293254	3.81035	0.00013877	0.00136772	AAEL003656
LOC5575341	10577	-4.23802	1.1124	-3.80981	0.000139073	0.00136983	AAEL002606	odorant binding protein OBP35 [Source:VB Community Annotation]	OBP35
LOC5563999	504.487	-0.310712	0.0815714	-3.80908	0.000139487	0.00137305	AAEL023695
LOC5574137	625.257	1.12851	0.296315	3.80849	0.00013982	0.00137476	AAEL010944
LOC110678034	11.7787	1.26271	0.331554	3.80846	0.000139836	0.00137476	AAEL026070
LOC5578080	55.8193	0.871673	0.228894	3.8082	0.00013998	0.00137531	AAEL003435
LOC5574826	234.134	0.365173	0.0959077	3.80754	0.000140354	0.00137813	AAEL002465
LOC5578153	872.314	-0.371378	0.0975452	-3.80724	0.000140524	0.00137893	AAEL013534	tgf-beta resistance-associated protein trag [Source:VB Community Annotation]
LOC5574101	482.871	0.360445	0.0946943	3.80641	0.000141	0.00138274	AAEL002248
LOC5566116	1781.72	-0.782268	0.205564	-3.80547	0.000141535	0.00138711	AAEL005174
LOC5573413	15781.8	-0.267738	0.0703722	-3.8046	0.000142031	0.00139048	AAEL002047	40S ribosomal protein S10 [Source:UniProtKB/TrEMBL;Acc:Q1HR41]	RpS10
LOC5574230	154.822	-1.31576	0.345838	-3.80456	0.000142056	0.00139048	AAEL010998
LOC5571143	834.065	-0.341544	0.0898173	-3.80266	0.000143153	0.00140034	AAEL008853	choline/ethanolamine kinase [Source:VB Community Annotation]
LOC5575013	322.246	-0.329469	0.0866569	-3.802	0.000143533	0.00140319	AAEL019769
LOC110678526	6.9968	-3.88497	1.02193	-3.80161	0.000143756	0.00140449	AAEL024956
LOC5572365	19880.3	-0.287473	0.0756658	-3.79924	0.000145138	0.00141711	AAEL009747	40S ribosomal protein S18 [Source:UniProtKB/TrEMBL;Acc:Q1HRL8]	RpS18
LOC5567422	325.75	-1.05778	0.278454	-3.79875	0.000145426	0.00141904	AAEL006073	ubiquitin-conjugating enzyme E2-230k [Source:VB Community Annotation]
LOC110676352	10.2542	1.62062	0.42665	3.79847	0.00014559	0.00141975	AAEL024108
LOC5569807	234.038	-3.29363	0.867246	-3.79781	0.000145981	0.00142268	AAEL001287
LOC5569236	78.8014	-0.626973	0.165137	-3.79669	0.000146641	0.00142822	AAEL007487
LOC5567058	48.5475	-1.39828	0.368308	-3.79649	0.000146757	0.00142846	AAEL005776	odorant receptor obligate co-receptor (Orco) [Source:VB Community Annotation]	Orco	SGPRor7
LOC5576465	88.1994	-0.653771	0.172247	-3.79554	0.000147323	0.00143308	AAEL021084
LOC5580062	101.57	0.650417	0.171375	3.79528	0.00014748	0.00143372	AAEL002135	tubulin-specific chaperone b (tubulin folding cofactor b) [Source:VB Community Annotation]
LOC5570537	216.191	-0.375175	0.0988676	-3.79472	0.000147808	0.00143602	AAEL001410	snf2 histone linker phd ring helicase [Source:VB Community Annotation]
LOC5575147	113.911	0.46836	0.123431	3.79451	0.000147934	0.00143635	AAEL000332	Mitochondrial inner membrane protease ATP23 [Source:UniProtKB/TrEMBL;Acc:A0A1S4EVL9]
LOC5575336	41.5563	0.754852	0.198987	3.79347	0.000148555	0.00144149	AAEL002592
LOC5568607	147.084	-0.441294	0.116387	-3.7916	0.00014968	0.00145151	AAEL006963
LOC110680750	1.57537	3.83334	1.01147	3.78987	0.000150726	0.00146074	AAEL026189
LOC5572878	534.315	-1.42812	0.376846	-3.78966	0.000150856	0.00146111	AAEL020040
LOC110675246	258.152	0.658488	0.173792	3.78895	0.000151287	0.00146437	AAEL019976
LOC5571655	164.231	-0.440719	0.116325	-3.78868	0.000151448	0.00146503	AAEL001651
LOC5570222	149.01	0.483189	0.127541	3.78851	0.000151552	0.00146513	AAEL008186
LOC5568149	447.163	-1.39197	0.367489	-3.78779	0.000151995	0.00146851	AAEL006587
LOC5577327	395.725	0.287094	0.0757983	3.78761	0.000152105	0.00146866	AAEL000410	glycoprotein 25l [Source:VB Community Annotation]
LOC5564047	576.99	0.549764	0.145183	3.78669	0.000152667	0.00147318	AAEL004071	nitrogen fixation protein nifu [Source:VB Community Annotation]
LOC110679151	19.488	1.22633	0.323872	3.78647	0.000152802	0.00147358	AAEL027844
LOC5567804	326.623	-1.54074	0.407148	-3.78422	0.00015419	0.00148604	AAEL000108	leucine aminopeptidase [Source:VB Community Annotation]
LOC5571080	8226.58	-0.773607	0.204496	-3.78299	0.000154957	0.00149095	AAEL008787	V-type proton ATPase catalytic subunit A (V-ATPase subunit A)(EC 3.6.3.14)(Vacuolar proton pump subunit alpha)(V-ATPase 69 kDa subunit) [Source:VB Community Annotation]	VhaA
LOC5578313	24050.3	-0.2781	0.0735133	-3.78299	0.000154958	0.00149095	AAEL013625	40S ribosomal protein S5 [Source:UniProtKB/TrEMBL;Acc:Q1HRT9]	RpS5
LOC5563709	1364.28	-0.445192	0.117684	-3.78294	0.000154985	0.00149095	AAEL003914	calcium/calmodulin-dependent serine protein kinase membrane-associated guanylate kinase (cask) [Source:VB Community Annotation]
LOC5572709	45.4543	-2.03182	0.537306	-3.7815	0.000155885	0.00149869	AAEL009978
LOC5578594	94.2476	0.689013	0.182292	3.77973	0.000156998	0.00150848	AAEL013771	mitochondrial ribosomal protein, L54, putative [Source:VB Community Annotation]	mRpL54
LOC5568290	1432.85	2.37763	0.629165	3.77903	0.000157443	0.00151182	AAEL006756
LOC5567576	4013.94	-1.33583	0.353619	-3.7776	0.000158349	0.00151959	AAEL006179	tubulin alpha chain [Source:VB Community Annotation]
LOC5564632	124.361	0.480841	0.127299	3.77725	0.000158571	0.00152018	AAEL004350	janus A, putative [Source:VB Community Annotation]
LOC110674028	2011.73	-0.319556	0.0846015	-3.77719	0.000158605	0.00152018	AAEL026232
LOC5566046	773.91	-0.878157	0.232539	-3.77639	0.000159118	0.00152393	AAEL005137	tetraspanin, putative [Source:VB Community Annotation]
LOC5576018	252.736	-1.04466	0.276637	-3.77628	0.000159191	0.00152393	AAEL012248	Histamine-gated chloride channel subunit [Source:UniProtKB/TrEMBL;Acc:A0A1S4FVK1]
LOC110680551	34.0343	0.744191	0.197087	3.77594	0.000159403	0.00152503	AAEL021264
LOC5569550	403.63	-2.69119	0.713153	-3.77365	0.000160875	0.00153818	AAEL027927
LOC110678843	5.42966	2.07552	0.550276	3.77179	0.000162083	0.00154787	AAEL021804
LOC5570826	120.503	0.980921	0.260069	3.77178	0.000162087	0.00154787	AAEL008609	zinc carboxypeptidase [Source:VB Community Annotation]
LOC5578156	13115.1	-0.254663	0.0675232	-3.77149	0.000162279	0.00154876	AAEL013536	ubiquitin (ribosomal protein L40) [Source:VB Community Annotation]
LOC5567820	528.741	-1.14967	0.304899	-3.77067	0.00016281	0.00155289	AAEL001000	1-acyl-sn-glycerol-3-phosphate acyltransferase [Source:UniProtKB/TrEMBL;Acc:A0A1S4EXH8]
LOC5576179	56.7642	-0.720098	0.19099	-3.77033	0.000163029	0.00155403	AAEL012371
LOC5577718	1086.1	-1.15367	0.306031	-3.76978	0.00016339	0.0015562	AAEL019528
LOC110678383	300.8	-0.477077	0.126556	-3.76968	0.000163455	0.0015562	AAEL027120
LOC5567109	1708.08	0.553763	0.146917	3.76924	0.000163748	0.00155804	AAEL005832	programmed cell death [Source:VB Community Annotation]
LOC5574256	91.6655	-0.564945	0.14991	-3.76855	0.000164197	0.00156136	AAEL011014
LOC5567260	122.324	0.443121	0.117622	3.76732	0.00016501	0.00156814	AAEL005928
LOC110676669	138.683	-0.467421	0.124192	-3.7637	0.000167416	0.0015898	AAEL026406
LOC5579261	756.491	-0.435106	0.115609	-3.76359	0.000167491	0.0015898	AAEL020403
LOC110680555	16.9915	0.976076	0.259365	3.76332	0.00016767	0.00159053	AAEL020871
LOC110678467	51.6548	-2.03699	0.541388	-3.76253	0.000168204	0.00159463	AAEL026860
LOC5568214	98.0593	0.562425	0.149512	3.76175	0.000168729	0.00159864	AAEL006641
LOC5567273	86.6746	-0.721055	0.191712	-3.76113	0.000169148	0.00160164	AAEL005915	monocarboxylate transporter [Source:VB Community Annotation]
LOC5574592	1889.13	-0.550907	0.146498	-3.76052	0.000169563	0.0016046	AAEL002411
LOC5567176	986.793	-0.799007	0.212555	-3.75906	0.000170554	0.001613	AAEL000856	germ cell-less protein [Source:VB Community Annotation]
LOC110674510	15.8941	1.83707	0.488782	3.75847	0.000170956	0.00161584	AAEL020797
LOC5569234	589.427	-0.867511	0.230923	-3.75671	0.000172165	0.00162628	AAEL024337
LOC5575676	115.77	-1.47117	0.391734	-3.75553	0.000172972	0.00163292	AAEL011996		AKHR-II
LOC5578376	937.712	-0.213742	0.0569411	-3.75374	0.000174215	0.00164304	AAEL019481
LOC110680619	261.546	0.407895	0.10867	3.75353	0.000174359	0.00164304	AAEL021316
LOC5564671	261.546	0.407895	0.10867	3.75353	0.000174359	0.00164304	AAEL021316
LOC110681168	171.661	0.367992	0.0981031	3.75107	0.000176082	0.00165825	AAEL022327
LOC5575779	17.6762	-1.13674	0.303056	-3.75092	0.000176185	0.00165825	AAEL026581
LOC5577525	135.389	-1.22174	0.325781	-3.75019	0.000176699	0.00166209	AAEL003183	oxidoreductase [Source:VB Community Annotation]
LOC5566689	234.978	0.339455	0.0905625	3.74829	0.000178046	0.001673	AAEL005579	developmentally regulated GTP-binding protein 1 (drg 1) [Source:VB Community Annotation]
LOC5575727	106.119	-0.425217	0.113444	-3.74825	0.000178071	0.001673	AAEL012040
LOC5569687	142.65	0.724005	0.193285	3.74579	0.000179831	0.00168851	AAEL007839	beta-hexosaminidase [Source:VB Community Annotation]
LOC110677148	67.7901	-0.686467	0.183328	-3.74448	0.000180769	0.0016963	AAEL023699
LOC5567874	2449.39	-0.427652	0.114266	-3.74261	0.00018212	0.00170797	AAEL006330	microtubule associated serine/threonine kinase [Source:VB Community Annotation]
LOC5580096	534.936	-0.289835	0.077473	-3.7411	0.000183213	0.00171718	AAEL002145	gonadotropin inducible transcription factor [Source:VB Community Annotation]
LOC5565085	1354.33	0.335609	0.0897176	3.74073	0.000183489	0.00171874	AAEL023069	26S protease regulatory subunit [Source:UniProtKB/TrEMBL;Acc:Q16FL0]
LOC5576215	21070.5	-0.180205	0.0481857	-3.73981	0.000184159	0.00172399	AAEL002832	40S ribosomal protein S26 [Source:UniProtKB/TrEMBL;Acc:Q1HQE4]	RpS26
LOC110676086	12.0113	-1.34649	0.360129	-3.73891	0.000184822	0.00172874	AAEL025418
LOC5574073	1903.92	-0.611005	0.163423	-3.7388	0.000184901	0.00172874	AAEL010911	Kelch-like protein diablo [Source:UniProtKB/Swiss-Prot;Acc:Q16RL8]	dbo
LOC5568148	164.947	-0.451836	0.120855	-3.73867	0.000184997	0.00172874	AAEL006571	TOLL pathway signalling Ser/Thr Kinase. [Source:VB Community Annotation]	PELLE
LOC5578205	536.359	-1.69462	0.453596	-3.73596	0.000186998	0.00174639	AAEL003474
LOC5578342	222.427	-0.421894	0.112981	-3.7342	0.000188312	0.00175762	AAEL003540
LOC110681353	70.7449	0.555445	0.148777	3.73341	0.000188908	0.00176108	AAEL024180	39S mitochondrial ribosomal protein L17 [Source:UniProtKB/TrEMBL;Acc:Q17FI8]
LOC5578023	70.7449	0.555445	0.148777	3.73341	0.000188908	0.00176108	AAEL024180	39S mitochondrial ribosomal protein L17 [Source:UniProtKB/TrEMBL;Acc:Q17FI8]
LOC110678992	9.08273	-1.99765	0.535203	-3.73251	0.000189584	0.00176633	AAEL024218
LOC5578101	382.754	0.343619	0.0920739	3.73199	0.00018997	0.00176888	AAEL003418	microsomal signal peptidase 25 kda subunit [Source:VB Community Annotation]
LOC110678995	1.72229	-3.86062	1.0348	-3.73081	0.000190866	0.00177616	AAEL021808
LOC5575335	494.473	-0.273897	0.0734304	-3.73002	0.000191464	0.00178067	AAEL026381
LOC5569863	3644.1	-0.223441	0.0599122	-3.72947	0.000191882	0.0017835	AAEL007945	Eukaryotic translation initiation factor 3 subunit H (eIF3h) [Source:VB Community Annotation]
LOC5565221	529.708	-0.503577	0.135128	-3.72666	0.000194034	0.00180243	AAEL004682
LOC5576335	119.163	0.44684	0.119909	3.72647	0.000194177	0.00180269	AAEL027275
LOC5579094	99.0385	3.02632	0.812477	3.7248	0.000195468	0.0018136	AAEL003832	defensin anti-microbial peptide [Source:VB Community Annotation]	DEFC
LOC5576348	311.28	0.957044	0.256955	3.72456	0.000195659	0.0018143	AAEL002861
LOC5576977	14.9329	-1.0958	0.294248	-3.72406	0.000196044	0.0018168	AAEL003069
LOC110674011	10.6062	-1.47069	0.394966	-3.72359	0.000196407	0.00181903	AAEL020016
LOC5573365	30.6999	-1.33371	0.358193	-3.72345	0.000196517	0.00181903	AAEL010451	rabaptin-5, putative [Source:VB Community Annotation]
LOC5572415	134.215	1.94628	0.522782	3.72293	0.00019692	0.00182169	AAEL009783	cuticle protein, putative [Source:VB Community Annotation]
LOC5575655	2198.55	-0.877881	0.235817	-3.72271	0.000197094	0.00182221	AAEL011981	glutamate decarboxylase [Source:VB Community Annotation]
LOC5569529	23695.6	-0.260479	0.0699756	-3.72243	0.000197317	0.0018232	AAEL007699	60S ribosomal protein L9 [Source:UniProtKB/TrEMBL;Acc:Q1HR72]	RpL9
LOC5579377	30.6842	4.54673	1.22191	3.72101	0.000198426	0.00183234	AAEL025196
LOC5575738	379.554	-1.4513	0.390045	-3.72087	0.00019854	0.00183234	AAEL012052
LOC5568000	482.349	0.637315	0.171336	3.71967	0.000199482	0.00183995	AAEL006447	GATA transcription factor (GATAb) [Source:VB Community Annotation]
LOC5578174	107.327	-0.424302	0.114079	-3.71938	0.000199709	0.00184096	AAEL013550
LOC5575346	18.4082	-1.38427	0.372236	-3.71881	0.000200162	0.00184406	AAEL002602	DNA photolyase [Source:VB Community Annotation]
LOC5570784	167.89	-2.40584	0.647073	-3.71803	0.000200781	0.00184867	AAEL022646	Larval chymotrypsin-like protein [Source:UniProtKB/TrEMBL;Acc:Q8T639]
LOC23687839	2934.25	0.581408	0.156412	3.71716	0.000201478	0.001854	AAEL017419
LOC5569951	186.224	-1.56983	0.422434	-3.71614	0.000202288	0.00186036	AAEL008046	rh antigen [Source:VB Community Annotation]
LOC110676177	23.808	-0.824102	0.222063	-3.71112	0.000206341	0.00189652	AAEL020461
LOC110677778	79.723	-4.0784	1.09909	-3.71072	0.000206673	0.0018977	AAEL023962
LOC5568336	651.867	-0.590727	0.159197	-3.71067	0.000206712	0.0018977	AAEL001433	fgf receptor activating protein [Source:VB Community Annotation]
LOC5577615	53.831	0.849307	0.2289	3.71038	0.000206952	0.00189862	AAEL028088
LOC5575913	16.761	1.33242	0.35912	3.71025	0.000207054	0.00189862	AAEL012157
LOC5570556	854.09	-0.369007	0.0994676	-3.70982	0.000207405	0.00190073	AAEL008373	Dipeptidyl-peptidase [Source:UniProtKB/TrEMBL;Acc:A0A1S4FJA4]
LOC5567840	106.034	0.472725	0.127467	3.7086	0.000208412	0.00190884	AAEL000982	mediator of RNA polymerase II transcription subunit 7 (Med7) [Source:VB Community Annotation]	Med7
LOC5574162	8.39461	-2.69984	0.728045	-3.70835	0.000208616	0.00190959	AAEL010963	brain chitinase and chia [Source:VB Community Annotation]
LOC110679853	1.73617	-4.35661	1.17491	-3.70805	0.000208863	0.00191074	AAEL021901
LOC110674460	7.16676	-2.33784	0.630546	-3.70764	0.000209199	0.0019127	AAEL023153
LOC5577775	10.924	2.84577	0.767726	3.70676	0.00020993	0.00191826	AAEL003299
LOC5568053	2.00423	-4.00951	1.08172	-3.70659	0.000210065	0.00191838	AAEL027959
LOC5573190	838.447	0.268329	0.072414	3.70549	0.000210986	0.00192566	AAEL001959
LOC5579816	66.6955	-0.76217	0.205706	-3.70514	0.000211274	0.00192717	AAEL018059
LOC5578901	56.7662	-0.662671	0.178896	-3.70423	0.000212034	0.00193297	AAEL023147
LOC5564732	218.308	-2.82363	0.762312	-3.70404	0.000212195	0.00193332	AAEL004407	allergen, putative [Source:VB Community Annotation]
LOC5565989	69.0874	0.58573	0.15814	3.70388	0.000212327	0.0019334	AAEL026142
LOC110677754	11.9584	-1.2943	0.349485	-3.70345	0.000212687	0.00193425	AAEL024252
LOC5576035	89.3091	-0.563891	0.152265	-3.70335	0.000212774	0.00193425	AAEL012263	Zinc finger protein [Source:UniProtKB/TrEMBL;Acc:A0A1S4FVL8]
LOC5572433	76.9711	0.5692	0.1537	3.70333	0.000212791	0.00193425	AAEL001797	endopeptidase clp, putative [Source:VB Community Annotation]
LOC5571677	2786.2	-1.51016	0.407856	-3.70267	0.00021334	0.00193812	AAEL001656	sodium-dependent phosphate transporter [Source:VB Community Annotation]
LOC110675371	53.9324	-0.717256	0.193726	-3.70241	0.000213557	0.00193896	AAEL027353
LOC5571646	215.759	-1.43768	0.388436	-3.70121	0.000214575	0.00194708	AAEL001645	Alkaline ceramidase [Source:UniProtKB/TrEMBL;Acc:Q17KM2]
LOC110677076	14.092	-1.68506	0.455508	-3.6993	0.000216195	0.00196065	AAEL023112
LOC110679384	2.76062	-3.12058	0.843767	-3.69839	0.000216969	0.00196653	AAEL022567
LOC5567836	240.154	-0.749067	0.202566	-3.69789	0.000217401	0.0019693	AAEL001009	dab2-interacting protein [Source:VB Community Annotation]
LOC110677042	12.2437	1.23606	0.334305	3.69741	0.000217814	0.0019719	AAEL025373
LOC110680269	701.381	-0.894165	0.241941	-3.6958	0.000219196	0.00198327	AAEL026783
LOC5565288	162.765	-4.33099	1.17192	-3.69565	0.000219328	0.00198331	AAEL024823
LOC5576595	50.3323	0.890916	0.241136	3.69466	0.00022018	0.00198912	AAEL002948	frataxin, putative [Source:VB Community Annotation]
LOC5566119	2808.46	-0.791156	0.214139	-3.69458	0.000220247	0.00198912	AAEL022497
LOC110679207	268.802	-1.67842	0.454305	-3.69446	0.000220351	0.00198912	AAEL022001
LOC5577472	17.1792	-1.83248	0.49628	-3.69244	0.000222114	0.00200389	AAEL013216
LOC5572184	164.118	-0.537	0.1455	-3.69072	0.000223618	0.0020163	AAEL019431	ecdysone receptor [Source:VB Community Annotation]	EcR
LOC110675933	84.4741	1.41586	0.383947	3.68766	0.000226327	0.00203955	AAEL023669
LOC5579927	46.4675	-1.094	0.296749	-3.68661	0.000227258	0.00204675	AAEL006815	cytochrome P450 [Source:VB Community Annotation]	CYP9J16
LOC5569737	33.332	-1.01634	0.275738	-3.6859	0.000227898	0.00205134	AAEL007876	tyrosine protein kinase with ig domain [Source:VB Community Annotation]
LOC5565257	2051.77	-0.88731	0.240743	-3.68571	0.000228068	0.00205169	AAEL004694	munc13-4 [Source:VB Community Annotation]
LOC110674220	11.4652	-1.96195	0.532489	-3.68448	0.000229166	0.00206039	AAEL020368
LOC5577011	144.532	0.437117	0.118713	3.68213	0.000231296	0.00207775	AAEL012924	mitochondrial ribosomal protein, S24, putative [Source:VB Community Annotation]	mRpS24
LOC110678485	183.779	0.443292	0.120397	3.68191	0.000231495	0.00207775	AAEL023070
LOC5564862	183.779	0.443292	0.120397	3.68191	0.000231495	0.00207775	AAEL023070
LOC5564272	289.373	0.566095	0.153819	3.68027	0.000232984	0.00208992	AAEL014368	sap18 [Source:VB Community Annotation]
LOC110676469	36.7586	0.901808	0.245053	3.68005	0.000233185	0.0020905	AAEL022234
LOC110679345	26.6643	0.887748	0.241251	3.67977	0.000233448	0.0020905	AAEL021535
LOC110681158	26.6643	0.887748	0.241251	3.67977	0.000233448	0.0020905	AAEL024586
LOC110681069	142.85	-2.35043	0.639013	-3.67822	0.000234864	0.0021013	AAEL023636
LOC110677052	14.4587	-1.52119	0.413574	-3.67816	0.000234923	0.0021013	AAEL026481
LOC5569941	99.6677	0.544825	0.148146	3.67762	0.000235421	0.00210456	AAEL008044
LOC5567364	353.144	-0.807208	0.219543	-3.67677	0.000236207	0.00211038	AAEL006035
LOC110679649	4.13597	-3.1363	0.853149	-3.67615	0.000236779	0.00211428	AAEL024615
LOC5567848	23782.5	-0.221235	0.0601882	-3.67571	0.000237187	0.00211672	AAEL000987	60S ribosomal protein L8 [Source:VB Community Annotation]	RpL8
LOC5571516	252.588	-1.76413	0.480001	-3.67527	0.000237599	0.00211919	AAEL009112
LOC5579040	98.952	-0.585723	0.159394	-3.67469	0.000238139	0.0021228	AAEL013974
LOC5568294	174.31	-2.61049	0.710515	-3.67409	0.000238702	0.00212571	AAEL006749
LOC5573849	252.806	-0.666917	0.181521	-3.67405	0.000238737	0.00212571	AAEL010766	inositol triphosphate 3-kinase c [Source:VB Community Annotation]
LOC5573222	338.588	-0.726131	0.197694	-3.673	0.000239724	0.00213328	AAEL010324
LOC110679483	15.2756	1.53146	0.417	3.67257	0.000240123	0.00213562	AAEL021487
LOC5577403	28.3722	0.821895	0.223905	3.67073	0.000241855	0.00214974	AAEL003165	low molecular weight protein-tyrosine-phosphatase [Source:VB Community Annotation]
LOC5574832	112.006	-0.501448	0.136612	-3.6706	0.000241985	0.00214974	AAEL011435	radical sam proteins [Source:VB Community Annotation]
LOC5570104	45.0439	0.69119	0.188335	3.67001	0.000242543	0.00215348	AAEL022595
LOC5566696	6088.41	-2.73768	0.746352	-3.66808	0.000244378	0.00216761
LOC110677787	24.1813	-1.8465	0.503403	-3.66805	0.000244411	0.00216761	AAEL020832
LOC5576660	64.6389	-3.41071	0.930162	-3.66679	0.000245614	0.00217704	AAEL012694	juvenile hormone-inducible protein, putative [Source:VB Community Annotation]
LOC5568210	94.278	0.548355	0.149555	3.66658	0.000245814	0.00217759	AAEL006645
LOC5569138	13.6163	-1.60307	0.437389	-3.66508	0.000247265	0.0021892	AAEL007393
LOC5568626	272.057	-0.391472	0.106827	-3.66455	0.000247772	0.00219245	AAEL022003
LOC5578314	139.734	-0.388036	0.105912	-3.66376	0.000248544	0.00219714	AAEL013624
LOC5566703	1653.96	-0.884069	0.241304	-3.66372	0.000248582	0.00219714	AAEL005583
LOC5569149	17.8679	-1.36609	0.372994	-3.6625	0.000249769	0.00220639	AAEL022465
LOC5567879	376.665	-0.998284	0.272589	-3.66224	0.000250022	0.00220737	AAEL006348	deoxyribonuclease I, putative [Source:VB Community Annotation]
LOC5565878	637.31	0.301202	0.0822671	3.66128	0.000250963	0.00221444	AAEL000679	NEDD8, putative [Source:VB Community Annotation]
LOC5573319	2074.53	-0.332855	0.0909162	-3.66112	0.000251116	0.00221454	AAEL010403	past-1 [Source:VB Community Annotation]
LOC5579933	111.843	0.8587	0.234589	3.66044	0.000251781	0.00221916	AAEL028635
LOC23687728	421.087	-3.13509	0.856607	-3.65989	0.00025232	0.00222266	AAEL017308
LOC110681238	27.8125	0.842988	0.230365	3.65936	0.000252846	0.00222604	AAEL021364
LOC5577197	224.018	-0.651154	0.177976	-3.65866	0.000253533	0.00223084	AAEL018255
LOC5567964	3192.76	1.31274	0.358844	3.65824	0.000253949	0.00223251	AAEL006425	trypsin [Source:VB Community Annotation]
LOC5575191	136.528	-3.29992	0.902065	-3.65818	0.000254009	0.00223251	AAEL000340	cytochrome P450 [Source:VB Community Annotation]
LOC5564252	262.44	0.444778	0.121592	3.65796	0.00025423	0.0022332	AAEL004180
LOC5576685	62.645	0.743369	0.203292	3.65666	0.000255522	0.0022433	AAEL012710
LOC5566120	2264.61	-1.19307	0.326345	-3.65587	0.000256312	0.00224897	AAEL005188	alpha-galactosidase/alpha-n-acetylgalactosaminidase [Source:VB Community Annotation]
LOC5575222	84.6715	0.496551	0.135886	3.65416	0.000258021	0.0022624	AAEL011688	cpg binding protein [Source:VB Community Annotation]
LOC5579095	102.069	3.29704	0.902295	3.65405	0.000258131	0.0022624	AAEL003857	defensin anti-microbial peptide [Source:VB Community Annotation]	DEFD
LOC5571750	8.20063	-1.68632	0.461642	-3.65286	0.000259331	0.00227165	AAEL027256
LOC5569182	1132.02	-0.612476	0.167707	-3.65205	0.000260153	0.00227758	AAEL007443	serine/threonine protein kinase [Source:VB Community Annotation]
LOC110675918	26.2631	-1.03314	0.282953	-3.65126	0.000260957	0.00228333	AAEL025164
LOC110675203	110.856	-1.17531	0.321922	-3.65092	0.000261299	0.00228505	AAEL027332
LOC5575776	3457.87	0.832138	0.227954	3.65046	0.000261771	0.00228791	AAEL002718	chitin synthase [Source:VB Community Annotation]
LOC5570982	156.813	-1.98811	0.544752	-3.64957	0.000262677	0.00229231	AAEL008701	myoinositol oxygenase [Source:VB Community Annotation]
LOC5571961	57.0255	-1.14956	0.31499	-3.64952	0.000262733	0.00229231	AAEL012369
LOC110681053	3.53097	-2.44997	0.671314	-3.64951	0.000262741	0.00229231	AAEL021172
LOC5575813	788.296	0.41183	0.112849	3.64939	0.00026286	0.00229231	AAEL012069	glutathione peroxidase [Source:VB Community Annotation]	GPXH1
LOC5565782	887.6	0.241476	0.0661789	3.64884	0.000263426	0.00229597	AAEL004977	Sec24B protein, putative [Source:VB Community Annotation]
LOC5576464	11.1697	-1.50439	0.412314	-3.64864	0.000263632	0.00229643	AAEL002916
LOC5573027	51.2776	-1.44728	0.396679	-3.6485	0.000263772	0.00229643	AAEL010197	axonemal dynein intermediate chain [Source:VB Community Annotation]
LOC5564424	55.1128	0.864594	0.236989	3.64825	0.000264035	0.00229744	AAEL014441
LOC5574733	185.089	-1.01192	0.2774	-3.64786	0.00026443	0.0022996	AAEL018216
LOC5565030	144.736	0.494283	0.135512	3.64752	0.00026478	0.00230023	AAEL026380
LOC5565624	13577.9	-0.232402	0.0637153	-3.64751	0.000264796	0.00230023	AAEL014292	40S ribosomal protein S24 [Source:UniProtKB/TrEMBL;Acc:Q8WQK7]	RpS24
LOC5575800	788.882	-0.521024	0.142861	-3.64708	0.000265241	0.00230282	AAEL012078	Gamma-glutamylcyclotransferase [Source:UniProtKB/TrEMBL;Acc:Q16N66]
LOC5566723	48.0588	0.646058	0.177178	3.64638	0.000265962	0.0023078	AAEL015236	signal recognition particle, 9kD-subunit, putative [Source:VB Community Annotation]
LOC5576028	598.548	0.385794	0.105847	3.64482	0.000267583	0.00232059	AAEL012266	cytochrome P450 [Source:VB Community Annotation]	CYP4C38
LOC110676058	5.1462	1.87676	0.514936	3.64465	0.000267755	0.00232079	AAEL023708
LOC5570308	4.8175	2.09933	0.576071	3.64421	0.000268211	0.00232345	AAEL008251	larval cuticle protein, putative [Source:VB Community Annotation]
LOC110674276	10.4674	-1.31718	0.36149	-3.64377	0.000268673	0.00232618	AAEL021959
LOC5564114	136.737	0.398863	0.109472	3.64352	0.000268933	0.00232714	AAEL004110	cdk10/11 [Source:VB Community Annotation]
LOC5569268	120.367	-0.855126	0.234735	-3.64294	0.000269542	0.00233112	AAEL007512	ATP-dependent RNA and DNA helicase [Source:VB Community Annotation]
LOC5568117	38.8129	0.854228	0.234713	3.63946	0.000273215	0.00236158	AAEL006563	Vitellogenic carboxypeptidase Precursor (EC 3.4.16.-) [Source:VB Community Annotation]	Vcp
LOC5567823	353.572	0.321815	0.0884364	3.63894	0.000273758	0.00236497	AAEL000981
LOC110676361	10.7966	-1.55308	0.426842	-3.63854	0.000274189	0.0023674	AAEL026612
LOC5578732	297.693	-0.440479	0.121089	-3.63764	0.000275147	0.00237232	AAEL024616
LOC110677255	7.56019	-1.75428	0.482263	-3.6376	0.000275189	0.00237232	AAEL024665
LOC5564567	1727.42	-2.29502	0.630921	-3.63758	0.000275214	0.00237232	AAEL014516	metalloproteinase, putative [Source:VB Community Annotation]
LOC5575459	68.6606	-0.592871	0.163016	-3.6369	0.000275942	0.00237729	AAEL011839
LOC5573490	30.5397	1.66991	0.459343	3.63543	0.000277513	0.00238951	AAEL010540	alpha-amylase [Source:VB Community Annotation]
LOC23687425	18.8975	-1.26489	0.347982	-3.63493	0.00027806	0.00239291	AAEL017005	GPCR Neuropeptide Y Family [Source:VB Community Annotation]	GPRNPY6	GPRNPY6B
LOC5572818	144.48	-0.443742	0.122166	-3.63228	0.00028093	0.00241596	AAEL001879
LOC5571436	1150.88	-0.352693	0.097104	-3.63212	0.000281105	0.00241596	AAEL009072	ribonucleoprotein [Source:VB Community Annotation]
LOC110675261	16.0302	0.960589	0.264477	3.63203	0.000281202	0.00241596	AAEL022684
LOC5575117	551.096	0.315372	0.0868455	3.63141	0.000281875	0.00242042	AAEL000342	peroxidasin [Source:VB Community Annotation]
LOC5568213	254.189	-0.580532	0.159902	-3.63054	0.000282827	0.00242727	AAEL019739
LOC5571212	923.253	-0.755382	0.208082	-3.63022	0.000283181	0.00242897	AAEL006905
LOC5577119	29.1762	-2.72909	0.752176	-3.62826	0.000285335	0.00244611	AAEL013018	odorant binding protein OBP56 [Source:VB Community Annotation]	OBP56
LOC5572779	36.6926	-1.65836	0.457088	-3.6281	0.000285518	0.00244634	AAEL019612
LOC5565414	47.2392	-0.600456	0.165526	-3.62757	0.000286105	0.00245002	AAEL024910
LOC5571920	65.3434	-0.989493	0.272817	-3.62694	0.000286798	0.0024541	AAEL009411	DNA-binding protein smubp-2 [Source:VB Community Annotation]
LOC5576744	29417.4	-0.284048	0.0783181	-3.62686	0.000286894	0.0024541	AAEL024536	Ribosomal protein L19 [Source:UniProtKB/TrEMBL;Acc:Q1HR74]
LOC5578055	228.784	-1.48403	0.409236	-3.62634	0.000287468	0.00245669	AAEL013483	short-chain dehydrogenase [Source:VB Community Annotation]
LOC5572804	6954.44	-1.66267	0.458504	-3.6263	0.00028751	0.00245669	AAEL001898
LOC5574618	126.797	0.416951	0.114993	3.62588	0.000287974	0.00245931	AAEL011254
LOC5577658	37.8389	1.08474	0.299206	3.62539	0.000288528	0.0024627	AAEL003279	clip-domain serine protease, putative [Source:VB Community Annotation]
LOC5576280	443.044	-0.263663	0.0727362	-3.62493	0.000289044	0.00246576	AAEL021579
LOC5578793	588.838	-0.335383	0.092547	-3.62392	0.000290166	0.00247288	AAEL003676	myosin I homologue, putative [Source:VB Community Annotation]
LOC5572033	359.715	-0.398724	0.110026	-3.6239	0.000290193	0.00247288	AAEL000254	nuclear factor i [Source:VB Community Annotation]
LOC5568319	398.246	0.40171	0.110864	3.62344	0.000290707	0.00247591	AAEL006727	multisynthetase complex, auxiliary protein, p38, putative [Source:VB Community Annotation]
LOC5567053	2755.05	0.369925	0.102161	3.62101	0.000293458	0.00249798	AAEL005772	odorant binding protein OBP22 [Source:VB Community Annotation]	OBP22
LOC5568609	425.245	-1.20295	0.332261	-3.6205	0.000294031	0.0025015	AAEL006978	protein-glutamine gamma-glutamyltransferase [Source:VB Community Annotation]
LOC5577914	6.5326	-2.29964	0.635334	-3.61958	0.00029508	0.00250906	AAEL003337
LOC5566683	85.0052	-0.552115	0.15257	-3.61876	0.000296019	0.00251568	AAEL023046
LOC110678312	107.464	-5.41558	1.49674	-3.61826	0.000296592	0.00251918	AAEL024791
LOC5568761	818.322	0.317521	0.0878073	3.61611	0.000299067	0.00253883	AAEL007114
LOC110679009	8.50659	-1.63745	0.452839	-3.61596	0.000299231	0.00253885	AAEL025869
LOC5577067	1566.5	-2.40977	0.666598	-3.61502	0.000300321	0.00254671	AAEL003093	elongase, putative [Source:VB Community Annotation]
LOC5567483	871.172	0.496052	0.13726	3.61394	0.000301574	0.00255596	AAEL000973
LOC110674102	15.1138	1.01791	0.281702	3.61345	0.000302151	0.00255946	AAEL023447
LOC5569547	6083.07	-0.379317	0.10499	-3.6129	0.000302797	0.00256355	AAEL007718	Eukaryotic translation initiation factor 3 subunit B (eIF3b)(Eukaryotic translation initiation factor 3 subunit 9) [Source:VB Community Annotation]
LOC5577431	31.7602	-0.917064	0.253882	-3.61216	0.000303651	0.00256937	AAEL013174
LOC5570316	51.5931	0.609349	0.1687	3.61203	0.000303813	0.00256937	AAEL008253
LOC5568292	18341.2	-1.34333	0.37192	-3.61188	0.000303986	0.00256945	AAEL006721	2-oxoglutarate dehydrogenase [Source:VB Community Annotation]
LOC5573256	493.152	1.28156	0.354981	3.61022	0.000305941	0.00258459	AAEL010338
LOC5568041	171.951	-1.31424	0.36414	-3.60915	0.000307201	0.00259383	AAEL006487	sodium/solute symporter [Source:VB Community Annotation]
LOC5564858	564.243	0.375376	0.104079	3.60665	0.000310179	0.00261756	AAEL004467
LOC5575484	70.1693	-0.718753	0.199361	-3.60529	0.000311807	0.00262989	AAEL011862
LOC5577100	260.869	-0.402846	0.111742	-3.60514	0.000311988	0.00263	AAEL012998
LOC5580295	125.066	-0.894246	0.248094	-3.60447	0.000312795	0.00263538	AAEL003002
LOC5568311	11.1271	-1.53583	0.426149	-3.60397	0.00031339	0.00263898	AAEL006732
LOC5565020	359.162	0.269869	0.0748924	3.60342	0.00031406	0.00264319	AAEL014698
LOC5566843	19778.4	-0.27855	0.0773124	-3.60291	0.000314672	0.00264693	AAEL000823	60S ribosomal protein L35A, putative [Source:UniProtKB/TrEMBL;Acc:Q17N60]	Rpl35
LOC110676148	1041.29	-2.63556	0.731559	-3.60266	0.000314972	0.00264803	AAEL025092
LOC5569936	1257.95	0.429937	0.119372	3.60166	0.00031619	0.00265685	AAEL008025
LOC5565060	640.845	0.383105	0.106437	3.59936	0.000319002	0.00267904	AAEL025769
LOC110675833	1082.19	0.180413	0.0501336	3.59864	0.000319883	0.00268499	AAEL024786
LOC5570057	134.809	-1.04569	0.290716	-3.59694	0.000321978	0.00270113	AAEL000184
LOC5564358	163.392	-0.466809	0.129798	-3.59643	0.000322616	0.00270504	AAEL004217
LOC5574555	64.6709	0.742884	0.206591	3.59592	0.000323246	0.00270887	AAEL011233	SM protein G, putative [Source:VB Community Annotation]
LOC5566037	22.1485	0.98674	0.274514	3.5945	0.000325013	0.00272222	AAEL015051	glycoside hydrolases [Source:VB Community Annotation]
LOC5575641	165.734	0.657051	0.182809	3.5942	0.000325388	0.00272313	AAEL011974
LOC5564661	156.749	-0.420895	0.117106	-3.59414	0.000325468	0.00272313	AAEL004359
LOC110678455	75.0092	-3.20685	0.89253	-3.59299	0.000326904	0.00273368	AAEL026901
LOC5575020	198.303	-0.684273	0.190505	-3.59189	0.000328282	0.00274374	AAEL026551
LOC5565312	65.1469	-0.886548	0.246899	-3.59073	0.000329752	0.00275455	AAEL004711	testis specific leucine rich repeat protein [Source:VB Community Annotation]
LOC110674190	9.33198	-1.42061	0.395666	-3.59042	0.000330141	0.00275575	AAEL005073
LOC23687518	59293	-2.78867	0.776714	-3.59034	0.000330247	0.00275575	AAEL017098
LOC110678053	1.60815	-3.72107	1.03671	-3.5893	0.000331565	0.00276474	AAEL023969
LOC110678719	8.57464	-2.49932	0.696342	-3.58921	0.000331677	0.00276474	AAEL020672
LOC5569397	97.7776	-1.21204	0.33773	-3.58879	0.000332213	0.00276774	AAEL007603	odorant binding protein (OBP10) [Source:VB Community Annotation]	OBP10
LOC5579805	96.3841	-0.917164	0.255645	-3.58764	0.000333682	0.00277849	AAEL003951
LOC5574102	26.2047	-2.11902	0.590733	-3.5871	0.000334376	0.00278181	AAEL002255
LOC5577310	13.0742	-1.29995	0.362399	-3.58705	0.000334434	0.00278181	AAEL019790
LOC5573948	206.424	0.396292	0.110494	3.58656	0.000335072	0.00278563	AAEL002183	oligosaccharyl transferase, subunit, putative [Source:VB Community Annotation]
LOC5573870	233.219	0.310271	0.086515	3.58633	0.000335369	0.00278662	AAEL010791	Autophagy-specific protein, putative [Source:VB Community Annotation]
LOC5567500	280.227	0.374409	0.104429	3.58531	0.000336684	0.00279606	AAEL006117	39S ribosomal protein L12, mitochondrial [Source:UniProtKB/TrEMBL;Acc:Q1HQL1]	mRpL12
LOC5573862	12764.1	-0.897353	0.25035	-3.58439	0.000337864	0.00280438	AAEL010783	sodium/potassium-dependent ATPase beta-2 subunit [Source:VB Community Annotation]
LOC5570848	721.922	0.478545	0.133542	3.58349	0.00033904	0.00281265	AAEL008624	ABC transporter [Source:VB Community Annotation]
LOC5571010	7692.86	-3.00971	0.839983	-3.58306	0.000339597	0.00281578	AAEL008746
LOC5577410	18.5294	2.06442	0.576365	3.58179	0.000341254	0.00282802	AAEL003156	fibrinogen and fibronectin [Source:VB Community Annotation]
LOC5565185	21.7085	-1.01835	0.28433	-3.58158	0.000341526	0.00282809	AAEL004630
LOC5563664	1498.91	0.24192	0.0675471	3.5815	0.000341623	0.00282809	AAEL000084	elongin b [Source:VB Community Annotation]
LOC5579200	628.471	-0.28968	0.0809144	-3.58009	0.00034348	0.00284197	AAEL026668
LOC110676961	11.095	-1.54027	0.430312	-3.57944	0.000344333	0.00284719	AAEL024554
LOC5572383	629.725	0.357997	0.100018	3.57933	0.000344475	0.00284719	AAEL009772
LOC110679696	3066.57	-1.72027	0.480752	-3.57829	0.000345843	0.00285699	AAEL020347
LOC5563628	4.22987	-2.46932	0.690167	-3.57786	0.000346419	0.00285977	AAEL000017
LOC5575991	638.695	-0.571342	0.159693	-3.57776	0.000346545	0.00285977	AAEL002760
LOC5574411	82.8461	-1.19124	0.332992	-3.57738	0.000347062	0.00286253	AAEL011118	Dual specificity protein kinase [Source:UniProtKB/TrEMBL;Acc:A0A1S4FSD2]
LOC5568525	706.604	-0.310928	0.0869357	-3.57653	0.00034818	0.00287024	AAEL024980
LOC5579417	674.084	1.89992	0.531387	3.5754	0.000349686	0.00288114	AAEL015458	transferrin [Source:VB Community Annotation]	Tf1
LOC110674736	10.298	1.19929	0.335514	3.57447	0.000350934	0.00288991	AAEL027542
LOC110676464	3.78814	2.31096	0.647085	3.57134	0.000355166	0.00292321	AAEL023361
LOC5572928	144.565	-0.510608	0.142988	-3.57099	0.000355634	0.00292553	AAEL010142
LOC110681132	24.9751	-2.27542	0.637248	-3.5707	0.000356023	0.00292719	AAEL021761
LOC5580149	1153.09	1.03471	0.289923	3.5689	0.00035848	0.00294585	AAEL002449
LOC5567951	62.1138	-0.553587	0.155135	-3.56841	0.000359156	0.00294986	AAEL015393
LOC5565745	295.705	-0.426197	0.11946	-3.5677	0.000360124	0.00295626	AAEL019832
LOC5575668	1113.97	0.508374	0.142515	3.56716	0.000360866	0.0029608	AAEL002687	sterol carrier protein-2, putative [Source:VB Community Annotation]
LOC5566830	17.4365	2.12613	0.596057	3.56699	0.000361109	0.00296125	AAEL005668
LOC5572135	160.863	-1.01127	0.283608	-3.56575	0.000362819	0.00297267	AAEL009544
LOC5567900	56.5686	0.589761	0.165398	3.5657	0.000362882	0.00297267	AAEL006355	Class C Scavenger Receptor (Sushi/SCR/CCP MAM and Somatomedin B domains). [Source:VB Community Annotation]	SCRC1
LOC110676448	6.86818	1.77426	0.497672	3.56511	0.000363701	0.00297782	AAEL020885
LOC5572229	350.48	0.408488	0.114592	3.5647	0.000364266	0.0029809	AAEL018182
LOC5568795	176.74	-0.573592	0.160945	-3.56391	0.000365378	0.00298843	AAEL007146	voltage-gated potassium channel [Source:VB Community Annotation]
LOC110674144	63.993	-1.84944	0.519042	-3.56318	0.000366387	0.00299512	AAEL024473
LOC5571528	29.6788	-1.65235	0.463815	-3.56251	0.000367319	0.00300118	AAEL009126	cytochrome P450 [Source:VB Community Annotation]	CYP6N6
LOC5568595	343.898	-0.421726	0.118418	-3.56134	0.000368962	0.00301303	AAEL018174
LOC5568436	2717.65	-0.220891	0.0620278	-3.56116	0.000369219	0.00301355	AAEL012661	Eukaryotic translation initiation factor 3 subunit G (eIF3g)(Eukaryotic translation initiation factor 3 subunit 4)(Eukaryotic translation initiation factor 3 RNA-binding subunit)(eIF-3 RNA-binding subunit) [Source:VB Community Annotation]	eIF3-S4-2
LOC5575382	63.0625	-0.858294	0.241056	-3.56056	0.000370061	0.00301885	AAEL011786
LOC110675256	88.9037	-1.55024	0.435573	-3.55908	0.000372151	0.00303433	AAEL021867
LOC110675975	29.3518	-1.33056	0.373884	-3.55876	0.000372615	0.00303653	AAEL023658
LOC5573224	1246.9	-0.251079	0.0705797	-3.55738	0.000374567	0.00305012	AAEL010315
LOC5573884	306.435	-0.893132	0.251069	-3.55731	0.000374672	0.00305012	AAEL010803	ncd [Source:VB Community Annotation]
LOC5571492	172.202	0.507827	0.142793	3.55638	0.000375999	0.00305848	AAEL001615	mitochondrial ribosomal protein, S18C, putative [Source:VB Community Annotation]	mRpS18C
LOC5577498	394.541	-1.72716	0.48566	-3.55632	0.000376089	0.00305848	AAEL003194	xaa-pro aminopeptidase [Source:VB Community Annotation]
LOC5565118	234.411	-0.893646	0.251411	-3.55452	0.000378671	0.00307788	AAEL014734
LOC5566925	81.928	-1.02076	0.287325	-3.55263	0.000381407	0.00309851	AAEL005694
LOC5575887	507.15	-1.58245	0.445555	-3.55165	0.000382823	0.00310771	AAEL002741	Class B Scavenger Receptor (CD36 domain). [Source:VB Community Annotation]	SCRB6
LOC5576116	169.356	-0.698338	0.196628	-3.55157	0.000382936	0.00310771	AAEL002808	diphthine synthase [Source:VB Community Annotation]
LOC5574069	7.94779	-1.559	0.439004	-3.55122	0.000383451	0.00310805	AAEL010907
LOC5568503	4806.05	-0.52309	0.147308	-3.55099	0.000383784	0.00310805	AAEL006922	calponin/transgelin [Source:VB Community Annotation]
LOC110679021	16.5324	0.915369	0.257784	3.55091	0.000383903	0.00310805	AAEL020738
LOC110678020	177.852	-0.52071	0.146646	-3.55079	0.000384073	0.00310805	AAEL012887
LOC5565059	269.201	-0.400041	0.112664	-3.55074	0.000384154	0.00310805	AAEL004551
LOC5567211	144.931	0.579978	0.163341	3.55073	0.000384168	0.00310805	AAEL020101
LOC110676140	9.94437	-1.23361	0.34747	-3.55028	0.000384828	0.0031117	AAEL020416
LOC5575942	6170.17	-2.58646	0.728549	-3.55015	0.000385016	0.0031117	AAEL024914	Putative synaptic vesicle transporter svop [Source:UniProtKB/TrEMBL;Acc:A0A0P6IYS1]
LOC5576103	787.78	0.625958	0.176363	3.54926	0.000386315	0.00312059	AAEL002797
LOC5564812	894.901	-0.358926	0.101141	-3.54876	0.000387047	0.00312331	AAEL021353
LOC5567515	938.334	-0.516707	0.145602	-3.54876	0.00038705	0.00312331	AAEL006139	Sodium/solute symporter [Source:UniProtKB/TrEMBL;Acc:A0A1S4FCK0]
LOC5572710	11.5222	-1.20675	0.340115	-3.54807	0.000388064	0.00312988	AAEL009987
LOC110678311	5.76876	-1.61987	0.456643	-3.54734	0.000389136	0.00313691	AAEL027214
LOC110675292	3.94927	2.36566	0.667242	3.54544	0.000391962	0.00315807	AAEL021285
LOC110676870	7.7461	-2.52606	0.71315	-3.54211	0.000396936	0.0031965	AAEL025462
LOC5565916	596.283	0.345456	0.0975339	3.54191	0.000397244	0.00319734	AAEL000682
LOC5566632	342.657	-0.514719	0.145337	-3.54155	0.000397788	0.00320007	AAEL000780	amino acid transporter [Source:VB Community Annotation]
LOC5566771	106.176	0.711664	0.200969	3.54117	0.000398356	0.00320281	AAEL005635	nucleoporin [Source:VB Community Annotation]
LOC5565261	103.826	-0.776588	0.219318	-3.54092	0.000398737	0.00320281	AAEL020830
LOC110677674	3.34162	-2.61886	0.739599	-3.54092	0.000398742	0.00320281	AAEL021632
LOC110676245	10.2519	-1.25898	0.355569	-3.54075	0.000398993	0.00320318	AAEL023079
LOC5564158	105.436	0.513136	0.144962	3.53978	0.000400458	0.00321273	AAEL004137	acyl-coa dehydrogenase [Source:VB Community Annotation]
LOC5576133	98.1771	0.63887	0.180487	3.53969	0.000400592	0.00321273	AAEL002812
LOC5569035	665.003	-0.351153	0.0992201	-3.53913	0.000401444	0.00321792	AAEL026700
LOC110677166	4.11335	-3.07397	0.86878	-3.53826	0.000402774	0.00322693	AAEL025479
LOC5573254	1458.43	-0.704826	0.19922	-3.53793	0.00040327	0.00322925	AAEL010337	CRAL/TRIO domain-containing protein [Source:VB Community Annotation]
LOC5567302	359.72	-2.00803	0.567655	-3.53742	0.000404055	0.00323389	AAEL005957	phospholipase b, plb1 [Source:VB Community Annotation]
LOC5565895	218.568	-1.23872	0.350385	-3.53532	0.000407288	0.00325676	AAEL019578
LOC110679721	98.9898	-0.912122	0.258005	-3.53529	0.000407329	0.00325676	AAEL025141
LOC5570157	28.7989	0.761439	0.215497	3.53341	0.000410237	0.00327834	AAEL008127
LOC110680759	46.0095	3.62731	1.02682	3.53257	0.000411534	0.00328535	AAEL027792	defensin anti-microbial peptide [Source:VB Community Annotation]	DEFA
LOC5579099	46.0095	3.62731	1.02682	3.53257	0.000411534	0.00328535	AAEL003841	defensin anti-microbial peptide [Source:VB Community Annotation]	DEFA
LOC5573424	25.8648	-1.1929	0.337702	-3.5324	0.00041181	0.00328588	AAEL022200
LOC5569618	18.7174	-1.0028	0.283907	-3.53214	0.000412213	0.00328743	AAEL021982
LOC110679264	7.60621	1.66248	0.470697	3.53196	0.000412494	0.003288	AAEL022902
LOC5565353	529.374	0.280082	0.0793194	3.53107	0.000413884	0.00329713	AAEL004738	Methionine aminopeptidase 2 [Source:UniProtKB/TrEMBL;Acc:Q17BZ1]
LOC5566774	172.136	-0.594788	0.16845	-3.53096	0.000414062	0.00329713	AAEL024005
LOC5568624	198.921	0.758288	0.214861	3.52921	0.000416806	0.0033173	AAEL006962
LOC110679236	3.77793	-2.52637	0.716058	-3.52816	0.000418458	0.00332876	AAEL026510
LOC5578503	284.386	0.428245	0.121432	3.52662	0.000420903	0.00334651	AAEL019998
LOC5570457	10.5062	1.60772	0.456019	3.52556	0.000422596	0.00335827	AAEL022137
LOC5567309	3880.17	-1.57177	0.445848	-3.52536	0.000422914	0.00335909	AAEL005964	actin [Source:VB Community Annotation]
LOC5568586	391.671	0.446763	0.126735	3.52517	0.000423209	0.00335973	AAEL001101	ATP-dependent transporter [Source:VB Community Annotation]
LOC5578147	457.535	0.436384	0.1238	3.52491	0.000423619	0.00336129	AAEL013528	thioredoxin peroxidase [Source:VB Community Annotation]	TPX1
LOC110681218	32.4692	0.7659	0.21739	3.52316	0.000426437	0.00338193	AAEL023372
LOC5579520	285.365	-0.478835	0.135971	-3.5216	0.000428953	0.00340016	AAEL014970
LOC23687967	39.467	-2.46075	0.698946	-3.52066	0.000430482	0.00341056	AAEL017547
LOC23687848	27.5325	-1.34029	0.380826	-3.51944	0.000432459	0.00342449	AAEL025638
LOC5579118	1004.98	-0.925709	0.263182	-3.51738	0.000435835	0.00344939	AAEL019627
LOC5572315	119.697	-1.29101	0.367051	-3.51725	0.000436043	0.00344939	AAEL009705
LOC5563841	332.797	-1.44026	0.409513	-3.51701	0.000436432	0.00345072	AAEL014171
LOC5578987	82.5684	-0.519258	0.147669	-3.51636	0.000437506	0.00345746	AAEL018307
LOC5574681	143.456	-1.14303	0.325083	-3.51613	0.000437883	0.00345864	AAEL014205
LOC5575485	90.0968	-0.445027	0.126572	-3.516	0.000438095	0.00345864	AAEL011868
LOC5563916	91.6139	-1.69675	0.48274	-3.51482	0.000440053	0.00347221	AAEL004001
LOC5566906	244.376	-0.369125	0.105023	-3.5147	0.000440258	0.00347221	AAEL025454
LOC5576492	69.7279	-0.89332	0.25422	-3.51396	0.000441473	0.00347852	AAEL002919
LOC5567802	174.153	-0.390436	0.11111	-3.51395	0.000441501	0.00347852	AAEL000140
LOC110674084	62.6473	-1.12988	0.321622	-3.51305	0.000442989	0.00348848	AAEL022176
LOC5563589	1026.61	0.25354	0.0721857	3.51234	0.000444188	0.00349482	AAEL000090	secretory carrier-associated membrane protein (scamp) [Source:VB Community Annotation]
LOC5574871	8206.02	-2.74474	0.781465	-3.5123	0.00044424	0.00349482	AAEL011470	cis,cis-muconate transport protein MucK, putative [Source:VB Community Annotation]
LOC5568536	355.265	0.28899	0.0822908	3.51182	0.000445055	0.00349948	AAEL006949
LOC5565856	165.069	0.539808	0.153777	3.51033	0.000447543	0.00351691	AAEL005040	E3 ubiquitin-protein ligase [Source:UniProtKB/TrEMBL;Acc:Q17BB8]
LOC5575698	284.035	0.426733	0.121569	3.51023	0.000447721	0.00351691	AAEL012000
LOC5568589	255.793	-0.709274	0.202084	-3.50979	0.000448453	0.00351927	AAEL001140	MutS protein homolog 4 [Source:VB Community Annotation]
LOC110679215	438.438	-2.94411	0.838828	-3.50978	0.00044847	0.00351927	AAEL025705
LOC110679230	5.05276	-1.79652	0.512042	-3.50854	0.00045057	0.00353299	AAEL023161
[truncated: 17,262 more rows]

## Sheet: GO Enrichment BP
GO.ID	Term	Annotated	Significant	Expected	weight01KS
GO:0006412	translation	288	151	77.46	< 1e-30
GO:0007602	phototransduction	10	8	2.69	3.7e-05
GO:0015991	ATP hydrolysis coupled proton transport	17	13	4.57	3.7e-05
GO:0018298	protein-chromophore linkage	10	7	2.69	0.00015
GO:0007018	microtubule-based movement	61	27	16.41	0.00035
GO:0034220	ion transmembrane transport	257	97	69.12	0.00057
GO:0018200	peptidyl-glutamic acid modification	7	4	1.88	0.00225
GO:0071805	potassium ion transmembrane transport	44	19	11.83	0.00299
GO:0007017	microtubule-based process	129	49	34.69	0.00361
GO:0007601	visual perception	16	8	4.3	0.00408
GO:0060285	cilium-dependent cell motility	5	4	1.34	0.00458
GO:0044248	cellular catabolic process	250	61	67.24	0.00727
GO:0006644	phospholipid metabolic process	96	17	25.82	0.00986
GO:0048589	developmental growth	12	6	3.23	0.01173
GO:1990542	mitochondrial transmembrane transport	6	5	1.61	0.01339
GO:0006816	calcium ion transport	37	16	9.95	0.01389
GO:0034765	regulation of ion transmembrane transpor...	31	13	8.34	0.01524
GO:0007186	G-protein coupled receptor signaling pat...	160	55	43.03	0.01574
GO:0070286	axonemal dynein complex assembly	10	6	2.69	0.01704
GO:0032981	mitochondrial respiratory chain complex ...	5	4	1.34	0.01761
GO:0042398	cellular modified amino acid biosyntheti...	10	4	2.69	0.01794
GO:0040008	regulation of growth	11	7	2.96	0.01931
GO:0001505	regulation of neurotransmitter levels	9	5	2.42	0.02033
GO:0090150	establishment of protein localization to...	21	9	5.65	0.02061
GO:0070972	protein localization to endoplasmic reti...	17	7	4.57	0.02086
GO:0008535	respiratory chain complex IV assembly	8	4	2.15	0.02098
GO:0060079	excitatory postsynaptic potential	10	5	2.69	0.02165
GO:0050808	synapse organization	6	4	1.61	0.02232
GO:0007205	protein kinase C-activating G-protein co...	6	2	1.61	0.02711
GO:0065008	regulation of biological quality	157	54	42.22	0.02777
GO:0032940	secretion by cell	27	10	7.26	0.03064
GO:0006811	ion transport	375	134	100.85	0.03113
GO:0003341	cilium movement	10	5	2.69	0.03303
GO:0007268	chemical synaptic transmission	31	13	8.34	0.03315
GO:0050482	arachidonic acid secretion	8	3	2.15	0.03346
GO:0016579	protein deubiquitination	36	15	9.68	0.03464
GO:0044275	cellular carbohydrate catabolic process	6	4	1.61	0.03617
GO:0001732	formation of cytoplasmic translation ini...	13	7	3.5	0.0375
GO:0006415	translational termination	6	2	1.61	0.03808
GO:0030837	negative regulation of actin filament po...	10	4	2.69	0.04058
GO:0007281	germ cell development	11	4	2.96	0.04182
GO:0051129	negative regulation of cellular componen...	24	7	6.45	0.04233
GO:0098869	cellular oxidant detoxification	33	15	8.88	0.04319
GO:0098771	inorganic ion homeostasis	27	9	7.26	0.04636
GO:0055080	cation homeostasis	27	9	7.26	0.04636
GO:0050790	regulation of catalytic activity	166	37	44.64	0.04662
GO:0033108	mitochondrial respiratory chain complex ...	15	7	4.03	0.04754
GO:0019430	removal of superoxide radicals	8	3	2.15	0.0479
GO:0009190	cyclic nucleotide biosynthetic process	22	7	5.92	0.04901
GO:0035235	ionotropic glutamate receptor signaling ...	15	8	4.03	0.04921
GO:0030150	protein import into mitochondrial matrix	8	3	2.15	0.05069
GO:0051049	regulation of transport	35	16	9.41	0.05291
GO:0006464	cellular protein modification process	739	195	198.75	0.05355
GO:0042274	ribosomal small subunit biogenesis	8	3	2.15	0.05587
GO:0055085	transmembrane transport	573	196	154.11	0.05735
GO:0006206	pyrimidine nucleobase metabolic process	5	4	1.34	0.05845
GO:0006040	amino sugar metabolic process	58	15	15.6	0.05851
GO:0006520	cellular amino acid metabolic process	130	33	34.96	0.06034
GO:0009226	nucleotide-sugar biosynthetic process	8	3	2.15	0.06046
GO:0032543	mitochondrial translation	10	5	2.69	0.06139
GO:0043462	regulation of ATPase activity	7	5	1.88	0.06696
GO:0031327	negative regulation of cellular biosynth...	53	10	14.25	0.06798
GO:0071407	cellular response to organic cyclic comp...	9	2	2.42	0.07326
GO:0032956	regulation of actin cytoskeleton organiz...	29	12	7.8	0.07581
GO:0033617	mitochondrial respiratory chain complex ...	6	2	1.61	0.07784
GO:0044743	protein transmembrane import into intrac...	13	6	3.5	0.07956
GO:0001510	RNA methylation	40	7	10.76	0.08552
GO:0044087	regulation of cellular component biogene...	36	15	9.68	0.08652
GO:0035556	intracellular signal transduction	188	55	50.56	0.08795
GO:0046174	polyol catabolic process	11	6	2.96	0.08822
GO:0090407	organophosphate biosynthetic process	154	30	41.42	0.08935
GO:0061024	membrane organization	37	12	9.95	0.09042
GO:0009628	response to abiotic stimulus	19	10	5.11	0.09119
GO:0098656	anion transmembrane transport	30	13	8.07	0.09147
GO:0006468	protein phosphorylation	266	82	71.54	0.09169
GO:0043648	dicarboxylic acid metabolic process	7	3	1.88	0.09354
GO:0010468	regulation of gene expression	555	101	149.26	0.09811
GO:0017004	cytochrome complex assembly	11	5	2.96	0.10208
GO:0035194	posttranscriptional gene silencing by RN...	17	7	4.57	0.10282
GO:0046112	nucleobase biosynthetic process	8	4	2.15	0.10393
GO:0048468	cell development	38	16	10.22	0.10786
GO:0042742	defense response to bacterium	7	4	1.88	0.10828
GO:0008610	lipid biosynthetic process	118	24	31.74	0.10919
GO:0006470	protein dephosphorylation	76	21	20.44	0.11578
GO:0006006	glucose metabolic process	14	8	3.77	0.11586
GO:0006626	protein targeting to mitochondrion	15	7	4.03	0.11665
GO:0046034	ATP metabolic process	54	11	14.52	0.11737
GO:0006406	mRNA export from nucleus	10	1	2.69	0.11867
GO:0006414	translational elongation	31	13	8.34	0.11931
GO:0007010	cytoskeleton organization	118	42	31.74	0.11949
GO:0045454	cell redox homeostasis	39	13	10.49	0.12006
GO:0072593	reactive oxygen species metabolic proces...	16	6	4.3	0.12215
GO:1901575	organic substance catabolic process	284	77	76.38	0.12273
GO:0009790	embryo development	6	3	1.61	0.12808
GO:0018022	peptidyl-lysine methylation	18	5	4.84	0.13084
GO:0044281	small molecule metabolic process	481	126	129.36	0.13098
GO:0046907	intracellular transport	220	55	59.17	0.13496
GO:0048015	phosphatidylinositol-mediated signaling	5	2	1.34	0.13759
GO:0002224	toll-like receptor signaling pathway	9	1	2.42	0.13769
GO:0035335	peptidyl-tyrosine dephosphorylation	36	10	9.68	0.13935
GO:0007266	Rho protein signal transduction	11	3	2.96	0.13939
GO:0006836	neurotransmitter transport	9	5	2.42	0.14025
GO:0032465	regulation of cytokinesis	7	4	1.88	0.14092
GO:0007163	establishment or maintenance of cell pol...	8	2	2.15	0.14119
GO:0006323	DNA packaging	24	7	6.45	0.14189
GO:0098609	cell-cell adhesion	24	5	6.45	0.14262
GO:0007229	integrin-mediated signaling pathway	8	1	2.15	0.14324
GO:0046653	tetrahydrofolate metabolic process	7	3	1.88	0.14453
GO:0006139	nucleobase-containing compound metabolic...	1294	252	348.02	0.14553
GO:0007093	mitotic cell cycle checkpoint	13	4	3.5	0.14747
GO:0010035	response to inorganic substance	10	4	2.69	0.14854
GO:0042176	regulation of protein catabolic process	7	3	1.88	0.1487
GO:0043624	cellular protein complex disassembly	17	6	4.57	0.14993
GO:0098657	import into cell	36	7	9.68	0.15093
GO:0006465	signal peptide processing	6	1	1.61	0.1518
GO:0006887	exocytosis	22	7	5.92	0.15393
GO:0035601	protein deacylation	6	1	1.61	0.15429
GO:0042157	lipoprotein metabolic process	26	2	6.99	0.15435
GO:0006829	zinc II ion transport	6	2	1.61	0.15715
GO:0048519	negative regulation of biological proces...	232	49	62.4	0.15807
GO:1902600	hydrogen ion transmembrane transport	51	21	13.72	0.15833
GO:0021700	developmental maturation	5	3	1.34	0.15862
GO:0023056	positive regulation of signaling	23	8	6.19	0.16131
GO:0010647	positive regulation of cell communicatio...	23	8	6.19	0.16131
GO:0050804	modulation of chemical synaptic transmis...	12	3	3.23	0.16136
GO:0007155	cell adhesion	79	23	21.25	0.16503
GO:0002183	cytoplasmic translational initiation	14	8	3.77	0.16539
GO:0031329	regulation of cellular catabolic process	11	4	2.96	0.16858
GO:0006611	protein export from nucleus	13	2	3.5	0.17114
GO:0042559	pteridine-containing compound biosynthet...	6	2	1.61	0.17282
GO:0006511	ubiquitin-dependent protein catabolic pr...	75	24	20.17	0.17414
GO:0006094	gluconeogenesis	10	5	2.69	0.1748
GO:0042325	regulation of phosphorylation	35	7	9.41	0.17628
GO:0032222	regulation of synaptic transmission, cho...	11	2	2.96	0.17744
GO:0030431	sleep	11	2	2.96	0.17744
GO:1903818	positive regulation of voltage-gated pot...	11	2	2.96	0.17744
GO:0050906	detection of stimulus involved in sensor...	31	6	8.34	0.18125
GO:0043666	regulation of phosphoprotein phosphatase...	11	2	2.96	0.18237
GO:0070588	calcium ion transmembrane transport	27	11	7.26	0.18404
GO:0035304	regulation of protein dephosphorylation	13	2	3.5	0.18444
GO:0045937	positive regulation of phosphate metabol...	14	3	3.77	0.1845
GO:0007218	neuropeptide signaling pathway	28	9	7.53	0.18509
GO:0006261	DNA-dependent DNA replication	25	4	6.72	0.18802
GO:0022411	cellular component disassembly	21	7	5.65	0.19164
GO:0030163	protein catabolic process	92	29	24.74	0.19188
GO:1901879	regulation of protein depolymerization	9	3	2.42	0.19188
GO:0051495	positive regulation of cytoskeleton orga...	16	6	4.3	0.19196
GO:1902905	positive regulation of supramolecular fi...	16	6	4.3	0.19196
GO:0042221	response to chemical	134	41	36.04	0.19274
GO:0009081	branched-chain amino acid metabolic proc...	7	2	1.88	0.19484
GO:0006334	nucleosome assembly	16	5	4.3	0.19488
GO:0072657	protein localization to membrane	22	10	5.92	0.19646
GO:0006298	mismatch repair	6	3	1.61	0.19865
GO:0032012	regulation of ARF protein signal transdu...	6	3	1.61	0.20035
GO:1902476	chloride transmembrane transport	12	6	3.23	0.20222
GO:0032392	DNA geometric change	31	7	8.34	0.20224
GO:0072528	pyrimidine-containing compound biosynthe...	15	5	4.03	0.20251
GO:0046058	cAMP metabolic process	7	4	1.88	0.20393
GO:0009755	hormone-mediated signaling pathway	8	3	2.15	0.2047
GO:0006413	translational initiation	48	18	12.91	0.20498
GO:0070646	protein modification by small protein re...	39	16	10.49	0.20523
GO:0034204	lipid translocation	5	1	1.34	0.20976
GO:0030001	metal ion transport	155	51	41.69	0.21269
GO:0044262	cellular carbohydrate metabolic process	40	12	10.76	0.21359
GO:0042254	ribosome biogenesis	81	15	21.78	0.2146
GO:0007034	vacuolar transport	13	4	3.5	0.21481
GO:0033365	protein localization to organelle	53	19	14.25	0.21659
GO:0051304	chromosome separation	10	1	2.69	0.21718
GO:0050896	response to stimulus	915	244	246.09	0.21804
GO:0009117	nucleotide metabolic process	144	34	38.73	0.22068
GO:1903311	regulation of mRNA metabolic process	9	5	2.42	0.22189
GO:0015698	inorganic anion transport	27	11	7.26	0.22412
GO:0072329	monocarboxylic acid catabolic process	9	2	2.42	0.2256
GO:0006396	RNA processing	288	58	77.46	0.22583
GO:0006825	copper ion transport	6	1	1.61	0.2261
GO:0006631	fatty acid metabolic process	59	17	15.87	0.22613
GO:1901071	glucosamine-containing compound metaboli...	55	14	14.79	0.22632
GO:0046854	phosphatidylinositol phosphorylation	14	6	3.77	0.22824
GO:0007271	synaptic transmission, cholinergic	12	3	3.23	0.22881
GO:0019722	calcium-mediated signaling	5	2	1.34	0.22968
GO:0006479	protein methylation	37	9	9.95	0.23049
GO:0006693	prostaglandin metabolic process	6	3	1.61	0.23065
GO:0030162	regulation of proteolysis	54	11	14.52	0.23447
GO:0006403	RNA localization	28	5	7.53	0.23449
GO:0070727	cellular macromolecule localization	161	41	43.3	0.23459
GO:0032268	regulation of cellular protein metabolic...	142	30	38.19	0.23461
GO:0050794	regulation of cellular process	1374	328	369.53	0.23595
GO:0048193	Golgi vesicle transport	37	10	9.95	0.23618
GO:0006979	response to oxidative stress	29	11	7.8	0.23645
GO:0006541	glutamine metabolic process	10	4	2.69	0.23727
GO:0000725	recombinational repair	9	3	2.42	0.23736
GO:0043173	nucleotide salvage	6	2	1.61	0.2378
GO:0000165	MAPK cascade	13	5	3.5	0.23795
GO:0045047	protein targeting to ER	11	3	2.96	0.23807
GO:0008272	sulfate transport	10	3	2.69	0.23934
GO:0045017	glycerolipid biosynthetic process	33	3	8.88	0.24443
GO:0032787	monocarboxylic acid metabolic process	87	27	23.4	0.24756
GO:0042981	regulation of apoptotic process	12	5	3.23	0.24759
GO:0051259	protein oligomerization	17	8	4.57	0.24869
GO:0080090	regulation of primary metabolic process	614	115	165.13	0.25347
GO:0044092	negative regulation of molecular functio...	61	13	16.41	0.2537
GO:0072330	monocarboxylic acid biosynthetic process	44	12	11.83	0.25652
GO:0009067	aspartate family amino acid biosynthetic...	9	1	2.42	0.25679
GO:0051130	positive regulation of cellular componen...	22	7	5.92	0.25707
GO:0043244	regulation of protein complex disassembl...	11	3	2.96	0.25715
GO:0012501	programmed cell death	44	14	11.83	0.25755
GO:0034645	cellular macromolecule biosynthetic proc...	979	264	263.3	0.25839
GO:0006259	DNA metabolic process	207	38	55.67	0.25961
GO:0048699	generation of neurons	30	10	8.07	0.25967
GO:1901615	organic hydroxy compound metabolic proce...	45	16	12.1	0.26075
GO:0032509	endosome transport via multivesicular bo...	5	1	1.34	0.26116
GO:0006555	methionine metabolic process	8	2	2.15	0.26232
GO:0006915	apoptotic process	43	13	11.56	0.26299
GO:0046434	organophosphate catabolic process	26	9	6.99	0.26375
GO:0006810	transport	1015	308	272.98	0.26589
GO:0000387	spliceosomal snRNP assembly	9	4	2.42	0.26618
GO:0044265	cellular macromolecule catabolic process	128	33	34.43	0.26631
GO:0051649	establishment of localization in cell	231	60	62.13	0.26657
GO:0055070	copper ion homeostasis	5	1	1.34	0.26788
GO:0048285	organelle fission	33	7	8.88	0.26865
GO:0016482	cytosolic transport	12	1	3.23	0.27401
GO:0032781	positive regulation of ATPase activity	5	3	1.34	0.27573
GO:0016226	iron-sulfur cluster assembly	10	4	2.69	0.28257
GO:0006448	regulation of translational elongation	7	3	1.88	0.28348
GO:0045893	positive regulation of transcription, DN...	17	1	4.57	0.28474
GO:0044282	small molecule catabolic process	55	15	14.79	0.28776
GO:0006563	L-serine metabolic process	6	1	1.61	0.2882
GO:0006544	glycine metabolic process	6	1	1.61	0.2882
GO:0006633	fatty acid biosynthetic process	42	12	11.3	0.28905
GO:0009072	aromatic amino acid family metabolic pro...	12	3	3.23	0.29124
GO:0000398	mRNA splicing, via spliceosome	53	14	14.25	0.29451
GO:0051704	multi-organism process	31	10	8.34	0.29454
GO:0048731	system development	59	19	15.87	0.29556
GO:0051347	positive regulation of transferase activ...	14	4	3.77	0.2971
GO:0031401	positive regulation of protein modificat...	17	5	4.57	0.2999
GO:0000302	response to reactive oxygen species	9	4	2.42	0.30187
GO:0016042	lipid catabolic process	50	9	13.45	0.30212
GO:0006801	superoxide metabolic process	11	3	2.96	0.3026
GO:0023061	signal release	6	3	1.61	0.30464
GO:0042246	tissue regeneration	8	2	2.15	0.30585
GO:0006950	response to stress	221	48	59.44	0.3064
GO:0032870	cellular response to hormone stimulus	10	3	2.69	0.30807
GO:0006730	one-carbon metabolic process	11	2	2.96	0.30874
GO:0016051	carbohydrate biosynthetic process	25	10	6.72	0.30894
GO:1990748	cellular detoxification	34	16	9.14	0.31175
GO:1901663	quinone biosynthetic process	9	4	2.42	0.31207
GO:0007099	centriole replication	7	3	1.88	0.31236
GO:0018393	internal peptidyl-lysine acetylation	16	2	4.3	0.31511
GO:0009083	branched-chain amino acid catabolic proc...	5	1	1.34	0.31711
GO:0008652	cellular amino acid biosynthetic process	29	7	7.8	0.31746
GO:0035195	gene silencing by miRNA	9	2	2.42	0.31785
GO:0006888	ER to Golgi vesicle-mediated transport	17	6	4.57	0.32014
GO:0006222	UMP biosynthetic process	5	3	1.34	0.32016
GO:0065003	macromolecular complex assembly	162	58	43.57	0.32118
GO:0006874	cellular calcium ion homeostasis	7	2	1.88	0.32595
GO:0005996	monosaccharide metabolic process	35	10	9.41	0.32601
GO:0006662	glycerol ether metabolic process	7	3	1.88	0.32762
GO:0006026	aminoglycan catabolic process	7	3	1.88	0.32838
GO:0050877	nervous system process	76	17	20.44	0.3299
GO:0044260	cellular macromolecule metabolic process	2115	556	568.82	0.33127
GO:0009066	aspartate family amino acid metabolic pr...	14	4	3.77	0.33138
GO:0006368	transcription elongation from RNA polyme...	11	4	2.96	0.33318
GO:0007411	axon guidance	21	8	5.65	0.33385
GO:0048666	neuron development	25	10	6.72	0.33411
GO:0006188	IMP biosynthetic process	7	2	1.88	0.3365
GO:0006402	mRNA catabolic process	33	6	8.88	0.33689
GO:0070507	regulation of microtubule cytoskeleton o...	8	4	2.15	0.33791
GO:0006672	ceramide metabolic process	5	1	1.34	0.33901
GO:0009057	macromolecule catabolic process	142	40	38.19	0.33952
GO:0032147	activation of protein kinase activity	5	2	1.34	0.34167
GO:0010608	posttranscriptional regulation of gene e...	50	15	13.45	0.34318
GO:0055114	oxidation-reduction process	706	192	189.88	0.34533
GO:0046916	cellular transition metal ion homeostasi...	13	4	3.5	0.34892
GO:0071897	DNA biosynthetic process	12	4	3.23	0.35021
GO:0042775	mitochondrial ATP synthesis coupled elec...	12	2	3.23	0.35126
GO:0006457	protein folding	48	7	12.91	0.35243
GO:0000278	mitotic cell cycle	46	13	12.37	0.35271
GO:0005977	glycogen metabolic process	7	2	1.88	0.35451
GO:1905515	non-motile cilium assembly	5	1	1.34	0.35813
GO:0000226	microtubule cytoskeleton organization	48	16	12.91	0.3591
GO:0045185	maintenance of protein location	5	1	1.34	0.35924
GO:0022008	neurogenesis	33	12	8.88	0.36045
GO:0030705	cytoskeleton-dependent intracellular tra...	14	3	3.77	0.3609
GO:0022607	cellular component assembly	228	75	61.32	0.36212
GO:0043604	amide biosynthetic process	300	152	80.68	0.36341
GO:0048511	rhythmic process	18	2	4.84	0.36625
GO:0006482	protein demethylation	5	1	1.34	0.3697
GO:0044267	cellular protein metabolic process	1126	367	302.83	0.3725
GO:0009084	glutamine family amino acid biosynthetic...	10	3	2.69	0.37288
GO:0071985	multivesicular body sorting pathway	6	1	1.61	0.37473
GO:0009987	cellular process	4037	1088	1085.73	0.37496
GO:0006614	SRP-dependent cotranslational protein ta...	9	3	2.42	0.37699
GO:0007098	centrosome cycle	9	3	2.42	0.37845
GO:0042752	regulation of circadian rhythm	5	0	1.34	0.38016
GO:0009611	response to wounding	11	2	2.96	0.38131
GO:0051128	regulation of cellular component organiz...	64	20	17.21	0.38218
GO:0006783	heme biosynthetic process	13	5	3.5	0.38452
GO:0006869	lipid transport	57	14	15.33	0.38483
GO:0009452	7-methylguanosine RNA capping	8	1	2.15	0.38944
GO:0017038	protein import	24	9	6.45	0.39048
GO:0080134	regulation of response to stress	17	4	4.57	0.39229
GO:0046395	carboxylic acid catabolic process	34	6	9.14	0.39479
GO:0043248	proteasome assembly	8	3	2.15	0.39555
GO:0030833	regulation of actin filament polymerizat...	26	10	6.99	0.39961
GO:0034655	nucleobase-containing compound catabolic...	61	11	16.41	0.40079
GO:0000027	ribosomal large subunit assembly	5	0	1.34	0.4018
GO:0046165	alcohol biosynthetic process	14	6	3.77	0.40206
GO:0006171	cAMP biosynthetic process	6	3	1.61	0.40729
GO:0007059	chromosome segregation	33	6	8.88	0.40809
GO:0010498	proteasomal protein catabolic process	23	6	6.19	0.40974
GO:0008154	actin polymerization or depolymerization	28	10	7.53	0.40975
GO:0032270	positive regulation of cellular protein ...	26	6	6.99	0.4123
GO:0071806	protein transmembrane transport	17	6	4.57	0.413
GO:0010817	regulation of hormone levels	6	3	1.61	0.41465
GO:0016052	carbohydrate catabolic process	21	9	5.65	0.41851
GO:0006813	potassium ion transport	49	20	13.18	0.4192
GO:0001522	pseudouridine synthesis	13	2	3.5	0.42049
GO:0035023	regulation of Rho protein signal transdu...	9	2	2.42	0.42208
GO:0030042	actin filament depolymerization	9	2	2.42	0.42251
GO:0046173	polyol biosynthetic process	11	5	2.96	0.42438
GO:0006744	ubiquinone biosynthetic process	8	3	2.15	0.42783
GO:0006890	retrograde vesicle-mediated transport, G...	5	2	1.34	0.42792
GO:0022618	ribonucleoprotein complex assembly	42	13	11.3	0.42823
GO:0046039	GTP metabolic process	5	1	1.34	0.42896
GO:1901070	guanosine-containing compound biosynthet...	5	1	1.34	0.42896
GO:0006760	folic acid-containing compound metabolic...	8	3	2.15	0.43036
GO:0009166	nucleotide catabolic process	12	4	3.23	0.43223
GO:0006560	proline metabolic process	7	1	1.88	0.43231
GO:1901292	nucleoside phosphate catabolic process	13	4	3.5	0.43592
GO:0009141	nucleoside triphosphate metabolic proces...	64	13	17.21	0.43723
GO:0046496	nicotinamide nucleotide metabolic proces...	26	6	6.99	0.43895
GO:0019752	carboxylic acid metabolic process	248	66	66.7	0.43925
GO:0006814	sodium ion transport	43	9	11.56	0.4404
GO:0006518	peptide metabolic process	310	156	83.37	0.44186
GO:0046855	inositol phosphate dephosphorylation	6	3	1.61	0.44466
GO:0016050	vesicle organization	6	2	1.61	0.44764
GO:0018065	protein-cofactor linkage	6	3	1.61	0.44779
GO:0050953	sensory perception of light stimulus	18	9	4.84	0.44881
GO:0009070	serine family amino acid biosynthetic pr...	9	2	2.42	0.44914
GO:0010033	response to organic substance	43	9	11.56	0.44938
GO:0030433	ubiquitin-dependent ERAD pathway	6	2	1.61	0.44944
GO:0032784	regulation of DNA-templated transcriptio...	5	1	1.34	0.44953
GO:0070887	cellular response to chemical stimulus	68	22	18.29	0.45291
GO:0031167	rRNA methylation	7	1	1.88	0.45454
GO:0007020	microtubule nucleation	6	0	1.61	0.45529
GO:0006952	defense response	29	8	7.8	0.45562
GO:0030522	intracellular receptor signaling pathway	8	3	2.15	0.45605
GO:0050684	regulation of mRNA processing	6	3	1.61	0.45665
GO:0048870	cell motility	8	5	2.15	0.45792
GO:0043101	purine-containing compound salvage	5	1	1.34	0.4585
GO:1901990	regulation of mitotic cell cycle phase t...	13	1	3.5	0.45865
GO:0015718	monocarboxylic acid transport	11	4	2.96	0.4598
GO:0043297	apical junction assembly	5	1	1.34	0.46148
GO:0009968	negative regulation of signal transducti...	20	4	5.38	0.47501
GO:0006091	generation of precursor metabolites and ...	99	21	26.63	0.47647
GO:0002181	cytoplasmic translation	19	10	5.11	0.4773
GO:0051260	protein homooligomerization	14	6	3.77	0.47789
GO:0006605	protein targeting	38	13	10.22	0.4789
GO:0032774	RNA biosynthetic process	530	92	142.54	0.48332
GO:0009416	response to light stimulus	14	9	3.77	0.48411
GO:0009152	purine ribonucleotide biosynthetic proce...	61	12	16.41	0.4846
GO:0016570	histone modification	53	6	14.25	0.4863
GO:0050793	regulation of developmental process	10	4	2.69	0.48926
GO:0051239	regulation of multicellular organismal p...	10	3	2.69	0.48926
GO:1901264	carbohydrate derivative transport	27	8	7.26	0.49048
GO:0015931	nucleobase-containing compound transport	54	12	14.52	0.4917
GO:0051276	chromosome organization	175	30	47.07	0.49207
GO:0046940	nucleoside monophosphate phosphorylation	5	2	1.34	0.49575
GO:0016197	endosomal transport	19	3	5.11	0.49622
GO:0000724	double-strand break repair via homologou...	8	2	2.15	0.50016
GO:0060271	cilium assembly	38	12	10.22	0.50101
GO:0007178	transmembrane receptor protein serine/th...	13	3	3.5	0.50109
GO:0006144	purine nucleobase metabolic process	9	2	2.42	0.50143
GO:0006839	mitochondrial transport	23	12	6.19	0.50148
GO:0015031	protein transport	225	55	60.51	0.50287
GO:0023052	signaling	676	183	181.81	0.50397
GO:0046903	secretion	36	13	9.68	0.5054
GO:0006098	pentose-phosphate shunt	6	2	1.61	0.50692
GO:0016125	sterol metabolic process	7	1	1.88	0.50774
GO:0060070	canonical Wnt signaling pathway	9	1	2.42	0.50994
GO:0006084	acetyl-CoA metabolic process	11	2	2.96	0.51058
GO:0010466	negative regulation of peptidase activit...	48	9	12.91	0.51114
GO:0006754	ATP biosynthetic process	20	2	5.38	0.51118
GO:0031109	microtubule polymerization or depolymeri...	8	1	2.15	0.51317
GO:0006974	cellular response to DNA damage stimulus	135	23	36.31	0.51326
GO:0048583	regulation of response to stimulus	93	24	25.01	0.51559
GO:0015867	ATP transport	18	6	4.84	0.51647
GO:0072594	establishment of protein localization to...	43	14	11.56	0.51785
GO:0050789	regulation of biological process	1461	356	392.93	0.5188
GO:0097035	regulation of membrane lipid distributio...	9	2	2.42	0.51978
GO:0048284	organelle fusion	5	1	1.34	0.52057
GO:0055082	cellular chemical homeostasis	23	7	6.19	0.52102
GO:0044249	cellular biosynthetic process	1281	334	344.52	0.52197
GO:0043410	positive regulation of MAPK cascade	6	3	1.61	0.52286
GO:0009056	catabolic process	316	82	84.99	0.52302
GO:0042773	ATP synthesis coupled electron transport	14	2	3.77	0.52391
GO:0002098	tRNA wobble uridine modification	10	4	2.69	0.5241
GO:0006955	immune response	30	8	8.07	0.52835
GO:0045087	innate immune response	25	7	6.72	0.52916
GO:0010970	transport along microtubule	12	2	3.23	0.52936
GO:0034314	Arp2/3 complex-mediated actin nucleation	11	4	2.96	0.53536
GO:0051650	establishment of vesicle localization	7	3	1.88	0.53663
GO:0018193	peptidyl-amino acid modification	136	31	36.58	0.53692
GO:0009108	coenzyme biosynthetic process	41	11	11.03	0.53746
GO:0006367	transcription initiation from RNA polyme...	13	2	3.5	0.53861
GO:0007269	neurotransmitter secretion	5	2	1.34	0.53961
GO:0051321	meiotic cell cycle	16	4	4.3	0.53963
GO:0003006	developmental process involved in reprod...	13	5	3.5	0.54027
GO:0006751	glutathione catabolic process	8	3	2.15	0.54236
GO:0018216	peptidyl-arginine methylation	12	1	3.23	0.54244
GO:0051346	negative regulation of hydrolase activit...	55	11	14.79	0.54393
GO:0042073	intraciliary transport	8	0	2.15	0.54401
GO:0006790	sulfur compound metabolic process	59	13	15.87	0.55155
GO:0032008	positive regulation of TOR signaling	8	3	2.15	0.55182
GO:0030111	regulation of Wnt signaling pathway	10	1	2.69	0.55611
GO:0072350	tricarboxylic acid metabolic process	25	4	6.72	0.5571
GO:0070918	production of small RNA involved in gene...	5	0	1.34	0.55774
GO:0006012	galactose metabolic process	6	1	1.61	0.55871
GO:0006490	oligosaccharide-lipid intermediate biosy...	10	1	2.69	0.56102
GO:0006461	protein complex assembly	99	38	26.63	0.56204
GO:0032886	regulation of microtubule-based process	9	4	2.42	0.56366
GO:0006793	phosphorus metabolic process	697	182	187.46	0.56757
GO:0051656	establishment of organelle localization	13	5	3.5	0.57079
GO:0032989	cellular component morphogenesis	29	9	7.8	0.57096
GO:0051298	centrosome duplication	8	3	2.15	0.57274
GO:0043408	regulation of MAPK cascade	8	4	2.15	0.57341
GO:0042219	cellular modified amino acid catabolic p...	10	3	2.69	0.57403
GO:0006897	endocytosis	35	6	9.41	0.57509
GO:0016071	mRNA metabolic process	156	35	41.96	0.57901
GO:0006284	base-excision repair	5	2	1.34	0.57944
GO:2001251	negative regulation of chromosome organi...	8	0	2.15	0.5827
GO:0072348	sulfur compound transport	11	3	2.96	0.58455
GO:0055072	iron ion homeostasis	12	4	3.23	0.58493
GO:1901616	organic hydroxy compound catabolic proce...	15	7	4.03	0.59026
GO:0006096	glycolytic process	12	4	3.23	0.59296
GO:0051052	regulation of DNA metabolic process	5	2	1.34	0.595
GO:0006575	cellular modified amino acid metabolic p...	28	9	7.53	0.59932
GO:0006071	glycerol metabolic process	6	2	1.61	0.59936
GO:0097435	supramolecular fiber organization	43	12	11.56	0.60116
GO:0006637	acyl-CoA metabolic process	13	2	3.5	0.60158
GO:0046474	glycerophospholipid biosynthetic process	32	2	8.61	0.60311
GO:0034728	nucleosome organization	20	7	5.38	0.60339
GO:1903047	mitotic cell cycle process	39	10	10.49	0.60486
GO:0006399	tRNA metabolic process	109	20	29.32	0.60641
GO:1903508	positive regulation of nucleic acid-temp...	26	2	6.99	0.60658
GO:0009168	purine ribonucleoside monophosphate bios...	35	6	9.41	0.60968
GO:0032508	DNA duplex unwinding	30	6	8.07	0.61067
GO:0007009	plasma membrane organization	6	2	1.61	0.6107
GO:1902533	positive regulation of intracellular sig...	16	7	4.3	0.61202
GO:0006351	transcription, DNA-templated	517	91	139.04	0.61327
GO:0003002	regionalization	9	3	2.42	0.61338
GO:1901606	alpha-amino acid catabolic process	23	4	6.19	0.61349
GO:0046835	carbohydrate phosphorylation	9	0	2.42	0.61411
GO:0044272	sulfur compound biosynthetic process	29	4	7.8	0.61711
GO:0071902	positive regulation of protein serine/th...	6	2	1.61	0.61789
GO:0006370	7-methylguanosine mRNA capping	6	1	1.61	0.6206
GO:0018205	peptidyl-lysine modification	43	10	11.56	0.62104
GO:0032446	protein modification by small protein co...	101	22	27.16	0.6227
GO:0043647	inositol phosphate metabolic process	10	5	2.69	0.62396
GO:0043254	regulation of protein complex assembly	27	10	7.26	0.62416
GO:0033043	regulation of organelle organization	55	17	14.79	0.62502
GO:0045859	regulation of protein kinase activity	29	5	7.8	0.62551
GO:0042060	wound healing	9	2	2.42	0.62606
GO:0048585	negative regulation of response to stimu...	21	4	5.65	0.62629
GO:0034968	histone lysine methylation	14	2	3.77	0.62765
GO:0006777	Mo-molybdopterin cofactor biosynthetic p...	5	2	1.34	0.62807
GO:0044237	cellular metabolic process	2825	731	759.77	0.62851
GO:0006165	nucleoside diphosphate phosphorylation	16	5	4.3	0.62867
GO:0018958	phenol-containing compound metabolic pro...	6	2	1.61	0.63002
GO:0006325	chromatin organization	104	19	27.97	0.63137
GO:0006807	nitrogen compound metabolic process	3065	779	824.32	0.63219
GO:0006650	glycerophospholipid metabolic process	57	12	15.33	0.63266
GO:0035082	axoneme assembly	11	6	2.96	0.63761
GO:0007043	cell-cell junction assembly	6	1	1.61	0.63846
GO:1901701	cellular response to oxygen-containing c...	16	6	4.3	0.63865
GO:0005975	carbohydrate metabolic process	199	59	53.52	0.64102
GO:0006270	DNA replication initiation	12	1	3.23	0.64321
GO:0007346	regulation of mitotic cell cycle	19	6	5.11	0.64417
GO:0031503	protein complex localization	10	0	2.69	0.64707
GO:0042592	homeostatic process	81	24	21.78	0.64737
GO:0002376	immune system process	32	9	8.61	0.64893
GO:0043549	regulation of kinase activity	30	5	8.07	0.64974
GO:0045787	positive regulation of cell cycle	5	1	1.34	0.65327
GO:0065002	intracellular protein transmembrane tran...	16	6	4.3	0.65336
GO:0006612	protein targeting to membrane	12	3	3.23	0.65484
GO:0006606	protein import into nucleus	9	2	2.42	0.65596
GO:0030030	cell projection organization	75	24	20.17	0.65755
GO:0045862	positive regulation of proteolysis	5	1	1.34	0.65901
GO:0046129	purine ribonucleoside biosynthetic proce...	10	1	2.69	0.65943
GO:0000245	spliceosomal complex assembly	6	0	1.61	0.65977
GO:0043414	macromolecule methylation	78	16	20.98	0.65992
GO:0006493	protein O-linked glycosylation	10	1	2.69	0.66136
GO:0009890	negative regulation of biosynthetic proc...	55	11	14.79	0.66263
GO:0035282	segmentation	6	2	1.61	0.66294
GO:0018108	peptidyl-tyrosine phosphorylation	31	10	8.34	0.67054
GO:0043044	ATP-dependent chromatin remodeling	8	3	2.15	0.67141
GO:0043174	nucleoside salvage	6	1	1.61	0.67448
GO:0051056	regulation of small GTPase mediated sign...	24	7	6.45	0.67578
GO:0045216	cell-cell junction organization	7	1	1.88	0.67684
GO:0006383	transcription from RNA polymerase III pr...	11	1	2.96	0.6776
GO:0071363	cellular response to growth factor stimu...	8	1	2.15	0.67851
GO:0071616	acyl-CoA biosynthetic process	6	1	1.61	0.67885
GO:0010628	positive regulation of gene expression	22	1	5.92	0.67963
GO:0007156	homophilic cell adhesion via plasma memb...	23	4	6.19	0.68474
GO:1901566	organonitrogen compound biosynthetic pro...	552	202	148.46	0.68552
GO:0046942	carboxylic acid transport	15	5	4.03	0.68631
GO:0017148	negative regulation of translation	14	4	3.77	0.68763
GO:0015914	phospholipid transport	11	2	2.96	0.69036
GO:2000113	negative regulation of cellular macromol...	45	8	12.1	0.69352
GO:0006487	protein N-linked glycosylation	6	2	1.61	0.69379
GO:0045934	negative regulation of nucleobase-contai...	38	4	10.22	0.6939
GO:0006914	autophagy	24	1	6.45	0.69397
GO:0031570	DNA integrity checkpoint	11	0	2.96	0.69401
GO:0034637	cellular carbohydrate biosynthetic proce...	9	2	2.42	0.69456
GO:0007166	cell surface receptor signaling pathway	130	28	34.96	0.69499
GO:0090502	RNA phosphodiester bond hydrolysis, endo...	19	6	5.11	0.69666
GO:0006066	alcohol metabolic process	33	13	8.88	0.69706
GO:0016126	sterol biosynthetic process	5	0	1.34	0.69754
GO:0031929	TOR signaling	16	4	4.3	0.6987
GO:0007031	peroxisome organization	9	3	2.42	0.69889
GO:0043436	oxoacid metabolic process	253	66	68.04	0.69911
GO:0016310	phosphorylation	405	119	108.92	0.69915
GO:0016311	dephosphorylation	127	30	34.16	0.69924
GO:0006446	regulation of translational initiation	5	2	1.34	0.7001
GO:0051253	negative regulation of RNA metabolic pro...	37	4	9.95	0.70052
GO:0006879	cellular iron ion homeostasis	9	3	2.42	0.7008
GO:0009132	nucleoside diphosphate metabolic process	20	6	5.38	0.7017
GO:0006997	nucleus organization	5	1	1.34	0.70274
GO:1901137	carbohydrate derivative biosynthetic pro...	189	32	50.83	0.70285
GO:0006725	cellular aromatic compound metabolic pro...	1339	266	360.12	0.70337
GO:0046467	membrane lipid biosynthetic process	25	1	6.72	0.7034
GO:0009059	macromolecule biosynthetic process	990	265	266.26	0.70436
GO:1901360	organic cyclic compound metabolic proces...	1357	268	364.96	0.70445
GO:0009605	response to external stimulus	41	21	11.03	0.70493
GO:0006119	oxidative phosphorylation	19	3	5.11	0.7058
GO:0034470	ncRNA processing	122	22	32.81	0.70798
GO:0023051	regulation of signaling	94	24	25.28	0.70996
GO:0046031	ADP metabolic process	14	5	3.77	0.71375
GO:0046033	AMP metabolic process	7	1	1.88	0.71443
GO:0015909	long-chain fatty acid transport	9	3	2.42	0.71568
GO:0006886	intracellular protein transport	141	32	37.92	0.7172
GO:0030149	sphingolipid catabolic process	7	0	1.88	0.71725
GO:0031328	positive regulation of cellular biosynth...	31	2	8.34	0.7176
GO:0010557	positive regulation of macromolecule bio...	31	2	8.34	0.7176
GO:0007610	behavior	8	2	2.15	0.71765
GO:0006189	de novo' IMP biosynthetic process	6	1	1.61	0.71938
GO:0009100	glycoprotein metabolic process	81	13	21.78	0.72048
GO:0009967	positive regulation of signal transducti...	22	7	5.92	0.72139
GO:0044255	cellular lipid metabolic process	198	41	53.25	0.72423
GO:0140056	organelle localization by membrane tethe...	11	1	2.96	0.72651
GO:0072522	purine-containing compound biosynthetic ...	64	12	17.21	0.72812
GO:0110053	regulation of actin filament organizatio...	27	10	7.26	0.72957
GO:1901568	fatty acid derivative metabolic process	8	3	2.15	0.73266
GO:0000288	nuclear-transcribed mRNA catabolic proce...	9	3	2.42	0.73378
GO:0051028	mRNA transport	24	4	6.45	0.7343
GO:0046839	phospholipid dephosphorylation	9	2	2.42	0.73464
GO:0006241	CTP biosynthetic process	6	1	1.61	0.7368
GO:0006476	protein deacetylation	5	0	1.34	0.73783
GO:0051640	organelle localization	25	7	6.72	0.7383
GO:0097164	ammonium ion metabolic process	13	2	3.5	0.7392
GO:0006405	RNA export from nucleus	13	1	3.5	0.73974
GO:0006310	DNA recombination	39	8	10.49	0.74248
GO:0019637	organophosphate metabolic process	261	60	70.19	0.74308
GO:0009116	nucleoside metabolic process	35	7	9.41	0.7439
GO:0007265	Ras protein signal transduction	22	7	5.92	0.74421
GO:1901135	carbohydrate derivative metabolic proces...	321	65	86.33	0.74424
GO:0034613	cellular protein localization	160	40	43.03	0.74756
GO:0031399	regulation of protein modification proce...	50	10	13.45	0.74841
GO:0006167	AMP biosynthetic process	5	0	1.34	0.74931
GO:0048518	positive regulation of biological proces...	118	23	31.74	0.7534
GO:0009653	anatomical structure morphogenesis	43	11	11.56	0.75388
GO:0051336	regulation of hydrolase activity	115	27	30.93	0.75685
GO:0044273	sulfur compound catabolic process	9	3	2.42	0.75768
GO:0008380	RNA splicing	87	23	23.4	0.75794
GO:0006826	iron ion transport	7	2	1.88	0.75848
GO:0006417	regulation of translation	39	9	10.49	0.75903
GO:0045892	negative regulation of transcription, DN...	30	4	8.07	0.75941
GO:0022904	respiratory electron transport chain	16	2	4.3	0.75964
GO:0000902	cell morphogenesis	27	9	7.26	0.7602
GO:0080135	regulation of cellular response to stres...	5	2	1.34	0.76082
GO:1901605	alpha-amino acid metabolic process	64	14	17.21	0.76133
GO:0009086	methionine biosynthetic process	7	1	1.88	0.762
GO:0006720	isoprenoid metabolic process	19	3	5.11	0.7621
GO:0098662	inorganic cation transmembrane transport	154	53	41.42	0.7633
GO:0006596	polyamine biosynthetic process	10	1	2.69	0.76408
GO:0032502	developmental process	204	46	54.86	0.7646
GO:0006333	chromatin assembly or disassembly	17	5	4.57	0.76532
GO:0097428	protein maturation by iron-sulfur cluste...	7	2	1.88	0.76663
GO:0044271	cellular nitrogen compound biosynthetic ...	962	274	258.73	0.76808
GO:1903506	regulation of nucleic acid-templated tra...	458	77	123.18	0.76877
GO:1903507	negative regulation of nucleic acid-temp...	36	4	9.68	0.76931
GO:0043086	negative regulation of catalytic activit...	60	12	16.14	0.77015
GO:0035966	response to topologically incorrect prot...	5	0	1.34	0.77171
GO:0007267	cell-cell signaling	64	18	17.21	0.77211
GO:0006260	DNA replication	73	13	19.63	0.7728
GO:0051252	regulation of RNA metabolic process	471	81	126.67	0.77657
GO:0006629	lipid metabolic process	300	66	80.68	0.77691
GO:0061640	cytoskeleton-dependent cytokinesis	6	2	1.61	0.77869
GO:0061025	membrane fusion	12	2	3.23	0.77893
GO:0022900	electron transport chain	58	11	15.6	0.77901
GO:0030036	actin cytoskeleton organization	53	18	14.25	0.77957
GO:0044089	positive regulation of cellular componen...	17	6	4.57	0.78594
GO:0007283	spermatogenesis	7	1	1.88	0.78736
GO:0000097	sulfur amino acid biosynthetic process	10	2	2.69	0.78775
GO:0098655	cation transmembrane transport	168	56	45.18	0.78884
GO:0006782	protoporphyrinogen IX biosynthetic proce...	7	2	1.88	0.79107
GO:0019438	aromatic compound biosynthetic process	667	126	179.39	0.79473
GO:0042147	retrograde transport, endosome to Golgi	9	1	2.42	0.79482
GO:0052547	regulation of peptidase activity	49	9	13.18	0.79572
GO:0007005	mitochondrion organization	49	20	13.18	0.79595
GO:0006082	organic acid metabolic process	256	66	68.85	0.79656
GO:0051345	positive regulation of hydrolase activit...	50	14	13.45	0.7967
GO:0015833	peptide transport	227	56	61.05	0.79746
GO:0010948	negative regulation of cell cycle proces...	12	1	3.23	0.79801
GO:0015672	monovalent inorganic cation transport	135	45	36.31	0.79853
GO:0007600	sensory perception	75	16	20.17	0.80026
GO:0015074	DNA integration	6	1	1.61	0.80407
GO:0006664	glycolipid metabolic process	25	1	6.72	0.80576
GO:0015780	nucleotide-sugar transport	5	0	1.34	0.80693
GO:0006635	fatty acid beta-oxidation	8	1	2.15	0.80713
GO:0016043	cellular component organization	589	167	158.41	0.80776
GO:0048278	vesicle docking	9	0	2.42	0.8104
GO:1902115	regulation of organelle assembly	5	2	1.34	0.81081
GO:0018342	protein prenylation	7	1	1.88	0.8111
GO:0080009	mRNA methylation	6	1	1.61	0.81282
GO:0098732	macromolecule deacylation	7	1	1.88	0.81423
GO:0033554	cellular response to stress	158	30	42.49	0.81528
GO:0009395	phospholipid catabolic process	6	1	1.61	0.81584
GO:0018212	peptidyl-tyrosine modification	32	10	8.61	0.82029
GO:0006366	transcription from RNA polymerase II pro...	179	30	48.14	0.82378
GO:0032367	intracellular cholesterol transport	10	2	2.69	0.82425
GO:1901136	carbohydrate derivative catabolic proces...	21	5	5.65	0.82485
GO:0006690	icosanoid metabolic process	7	3	1.88	0.82722
GO:0006338	chromatin remodeling	21	5	5.65	0.82929
GO:0006488	dolichol-linked oligosaccharide biosynth...	9	1	2.42	0.82934
GO:0071426	ribonucleoprotein complex export from nu...	12	1	3.23	0.83005
GO:0016072	rRNA metabolic process	51	9	13.72	0.83076
GO:0140053	mitochondrial gene expression	13	6	3.5	0.83252
GO:1901991	negative regulation of mitotic cell cycl...	9	0	2.42	0.83273
GO:0046164	alcohol catabolic process	13	6	3.5	0.83369
GO:0044242	cellular lipid catabolic process	19	2	5.11	0.83385
GO:0006891	intra-Golgi vesicle-mediated transport	5	1	1.34	0.83467
GO:0009253	peptidoglycan catabolic process	6	2	1.61	0.83602
GO:0072527	pyrimidine-containing compound metabolic...	20	6	5.38	0.83701
GO:0000470	maturation of LSU-rRNA	5	1	1.34	0.8372
GO:0043412	macromolecule modification	818	210	220	0.83775
GO:0045860	positive regulation of protein kinase ac...	9	2	2.42	0.83868
GO:0006739	NADP metabolic process	8	2	2.15	0.83941
GO:0019674	NAD metabolic process	7	0	1.88	0.83979
GO:0019359	nicotinamide nucleotide biosynthetic pro...	7	0	1.88	0.83979
GO:0043087	regulation of GTPase activity	46	11	12.37	0.84215
GO:0007029	endoplasmic reticulum organization	5	1	1.34	0.84236
GO:0006559	L-phenylalanine catabolic process	5	1	1.34	0.84413
GO:0046856	phosphatidylinositol dephosphorylation	8	2	2.15	0.84641
GO:0000290	deadenylation-dependent decapping of nuc...	6	2	1.61	0.84708
GO:1902358	sulfate transmembrane transport	9	2	2.42	0.84733
GO:0048017	inositol lipid-mediated signaling	6	2	1.61	0.84896
GO:0050909	sensory perception of taste	26	3	6.99	0.84898
GO:0007264	small GTPase mediated signal transductio...	57	14	15.33	0.84906
GO:0051693	actin filament capping	8	2	2.15	0.84941
GO:0009058	biosynthetic process	1338	355	359.85	0.8495
GO:0035725	sodium ion transmembrane transport	32	6	8.61	0.85048
GO:0009063	cellular amino acid catabolic process	25	5	6.72	0.85078
GO:0043547	positive regulation of GTPase activity	44	11	11.83	0.85192
GO:0045010	actin nucleation	15	5	4.03	0.8537
GO:0000070	mitotic sister chromatid segregation	23	3	6.19	0.85519
GO:0000413	protein peptidyl-prolyl isomerization	28	1	7.53	0.85523
GO:0009206	purine ribonucleoside triphosphate biosy...	23	2	6.19	0.85891
GO:0007219	Notch signaling pathway	15	1	4.03	0.86131
GO:0008033	tRNA processing	63	12	16.94	0.86176
GO:1901699	cellular response to nitrogen compound	11	1	2.96	0.86356
GO:0006432	phenylalanyl-tRNA aminoacylation	6	2	1.61	0.86567
GO:0051604	protein maturation	33	7	8.88	0.86617
GO:0009101	glycoprotein biosynthetic process	77	12	20.71	0.86703
GO:0006661	phosphatidylinositol biosynthetic proces...	27	1	7.26	0.86715
GO:0043094	cellular metabolic compound salvage	13	3	3.5	0.86781
GO:0016070	RNA metabolic process	916	169	246.35	0.86914
GO:0016485	protein processing	20	3	5.38	0.86971
GO:0046390	ribose phosphate biosynthetic process	68	15	18.29	0.86981
GO:0009156	ribonucleoside monophosphate biosyntheti...	41	9	11.03	0.86998
GO:0006796	phosphate-containing compound metabolic ...	679	178	182.61	0.8728
GO:0071900	regulation of protein serine/threonine k...	24	4	6.45	0.87565
GO:0030182	neuron differentiation	28	10	7.53	0.87885
GO:0030488	tRNA methylation	11	0	2.96	0.87921
GO:0006302	double-strand break repair	16	3	4.3	0.88022
GO:0048513	animal organ development	13	4	3.5	0.88074
GO:0055129	L-proline biosynthetic process	5	1	1.34	0.88126
GO:1901987	regulation of cell cycle phase transitio...	14	1	3.77	0.88365
GO:0007399	nervous system development	48	15	12.91	0.88375
GO:0043161	proteasome-mediated ubiquitin-dependent ...	20	5	5.38	0.88399
GO:0015850	organic hydroxy compound transport	12	2	3.23	0.88514
GO:0007094	mitotic spindle assembly checkpoint	7	0	1.88	0.88538
GO:0006120	mitochondrial electron transport, NADH t...	7	0	1.88	0.88613
GO:0046578	regulation of Ras protein signal transdu...	16	5	4.3	0.88641
GO:0000079	regulation of cyclin-dependent protein s...	15	1	4.03	0.88705
GO:0043043	peptide biosynthetic process	291	151	78.26	0.88949
GO:0000077	DNA damage checkpoint	10	0	2.69	0.88966
GO:0044782	cilium organization	42	12	11.3	0.89029
GO:0007049	cell cycle	148	31	39.8	0.89041
GO:0006182	cGMP biosynthetic process	14	2	3.77	0.89086
GO:0006397	mRNA processing	128	28	34.43	0.89388
GO:0006749	glutathione metabolic process	11	3	2.96	0.89406
GO:0006812	cation transport	213	71	57.29	0.89411
GO:0006928	movement of cell or subcellular componen...	87	37	23.4	0.89435
GO:0019953	sexual reproduction	21	4	5.65	0.89478
GO:0032259	methylation	108	25	29.05	0.89491
GO:0006665	sphingolipid metabolic process	19	2	5.11	0.8952
GO:0120036	plasma membrane bounded cell projection ...	65	20	17.48	0.8952
GO:0030029	actin filament-based process	54	18	14.52	0.8961
GO:0044772	mitotic cell cycle phase transition	14	1	3.77	0.89642
GO:0002218	activation of innate immune response	10	1	2.69	0.89682
GO:0006892	post-Golgi vesicle-mediated transport	5	0	1.34	0.89735
GO:0090305	nucleic acid phosphodiester bond hydroly...	73	16	19.63	0.89836
GO:0051494	negative regulation of cytoskeleton orga...	14	5	3.77	0.89876
GO:0015711	organic anion transport	46	13	12.37	0.90043
GO:0045786	negative regulation of cell cycle	27	5	7.26	0.90044
GO:0006364	rRNA processing	50	9	13.45	0.90297
GO:0006221	pyrimidine nucleotide biosynthetic proce...	14	4	3.77	0.9045
GO:0007154	cell communication	676	183	181.81	0.906
GO:0030261	chromosome condensation	7	1	1.88	0.90754
GO:0043484	regulation of RNA splicing	8	2	2.15	0.9085
GO:0043623	cellular protein complex assembly	81	30	21.78	0.909
GO:0008654	phospholipid biosynthetic process	51	4	13.72	0.91144
GO:0006313	transposition, DNA-mediated	5	0	1.34	0.912
GO:0036265	RNA (guanine-N7)-methylation	6	0	1.61	0.91541
GO:0019509	L-methionine salvage from methylthioaden...	6	1	1.61	0.91632
GO:0006534	cysteine metabolic process	6	1	1.61	0.91632
GO:0031124	mRNA 3'-end processing	6	1	1.61	0.91673
GO:0140013	meiotic nuclear division	7	2	1.88	0.91753
GO:0034660	ncRNA metabolic process	170	30	45.72	0.91847
GO:0045944	positive regulation of transcription fro...	12	0	3.23	0.91925
GO:0022402	cell cycle process	67	16	18.02	0.91936
GO:0046148	pigment biosynthetic process	21	6	5.65	0.91948
GO:0019932	second-messenger-mediated signaling	6	2	1.61	0.92075
GO:0030154	cell differentiation	65	21	17.48	0.92161
GO:0009165	nucleotide biosynthetic process	86	18	23.13	0.92227
GO:1901564	organonitrogen compound metabolic proces...	2041	576	548.92	0.92352
GO:0018208	peptidyl-proline modification	31	2	8.34	0.9243
GO:0051726	regulation of cell cycle	63	13	16.94	0.9246
GO:1901362	organic cyclic compound biosynthetic pro...	686	129	184.5	0.92512
GO:0006904	vesicle docking involved in exocytosis	8	0	2.15	0.92588
GO:2000112	regulation of cellular macromolecule bio...	489	85	131.51	0.92626
GO:0008643	carbohydrate transport	12	2	3.23	0.92749
GO:0016192	vesicle-mediated transport	163	36	43.84	0.92826
GO:0009167	purine ribonucleoside monophosphate meta...	69	15	18.56	0.92877
GO:0065004	protein-DNA complex assembly	20	6	5.38	0.92885
GO:1901068	guanosine-containing compound metabolic ...	8	2	2.15	0.92885
GO:0009179	purine ribonucleoside diphosphate metabo...	15	5	4.03	0.92904
GO:0007015	actin filament organization	35	11	9.41	0.92915
GO:0009314	response to radiation	15	9	4.03	0.92915
GO:0008283	cell proliferation	9	0	2.42	0.92972
GO:0009064	glutamine family amino acid metabolic pr...	21	5	5.65	0.9306
GO:0006281	DNA repair	122	22	32.81	0.93327
GO:0016567	protein ubiquitination	92	19	24.74	0.93336
GO:1901576	organic substance biosynthetic process	1302	344	350.17	0.93699
GO:0051180	vitamin transport	7	0	1.88	0.93746
GO:0006085	acetyl-CoA biosynthetic process	5	1	1.34	0.93775
GO:0006090	pyruvate metabolic process	17	5	4.57	0.938
GO:0007062	sister chromatid cohesion	11	0	2.96	0.93805
GO:0051170	nuclear import	10	2	2.69	0.93809
GO:0050658	RNA transport	27	4	7.26	0.9383
GO:0006099	tricarboxylic acid cycle	23	4	6.19	0.93969
GO:0006506	GPI anchor biosynthetic process	24	1	6.45	0.94078
GO:0006694	steroid biosynthetic process	6	0	1.61	0.9419
GO:0006401	RNA catabolic process	40	6	10.76	0.94388
GO:0060429	epithelium development	11	0	2.96	0.94452
GO:0051168	nuclear export	16	2	4.3	0.94526
GO:0090501	RNA phosphodiester bond hydrolysis	38	7	10.22	0.94556
GO:0071495	cellular response to endogenous stimulus	19	4	5.11	0.94619
GO:0042255	ribosome assembly	9	0	2.42	0.94642
GO:0009311	oligosaccharide metabolic process	8	1	2.15	0.94688
GO:1902532	negative regulation of intracellular sig...	5	1	1.34	0.94836
GO:0051603	proteolysis involved in cellular protein...	84	26	22.59	0.94851
GO:0034976	response to endoplasmic reticulum stress	7	2	1.88	0.94962
GO:1902904	negative regulation of supramolecular fi...	11	4	2.96	0.95025
GO:1901361	organic cyclic compound catabolic proces...	81	13	21.78	0.95151
GO:0050912	detection of chemical stimulus involved ...	7	2	1.88	0.9516
GO:0043085	positive regulation of catalytic activit...	69	18	18.56	0.95229
GO:0018130	heterocycle biosynthetic process	677	128	182.08	0.9524
GO:0060828	regulation of canonical Wnt signaling pa...	8	1	2.15	0.95245
GO:0031047	gene silencing by RNA	36	9	9.68	0.95292
GO:0090503	RNA phosphodiester bond hydrolysis, exon...	10	0	2.69	0.95301
GO:0097502	mannosylation	15	2	4.03	0.95308
GO:0007608	sensory perception of smell	27	3	7.26	0.95455
GO:0032501	multicellular organismal process	276	59	74.23	0.95456
GO:0048878	chemical homeostasis	32	10	8.61	0.95474
GO:0009147	pyrimidine nucleoside triphosphate metab...	7	1	1.88	0.955
GO:0019941	modification-dependent protein catabolic...	76	24	20.44	0.95618
GO:0034599	cellular response to oxidative stress	9	3	2.42	0.95628
GO:0043603	cellular amide metabolic process	335	161	90.1	0.95635
GO:0048523	negative regulation of cellular process	170	35	45.72	0.95651
GO:0048609	multicellular organismal reproductive pr...	18	4	4.84	0.95652
GO:0042127	regulation of cell proliferation	6	0	1.61	0.95659
GO:0007623	circadian rhythm	6	0	1.61	0.95824
GO:0010951	negative regulation of endopeptidase act...	44	7	11.83	0.95831
GO:0042180	cellular ketone metabolic process	13	5	3.5	0.95843
GO:0042273	ribosomal large subunit biogenesis	12	1	3.23	0.95949
GO:0006265	DNA topological change	5	0	1.34	0.96022
GO:0051235	maintenance of location	8	1	2.15	0.96046
GO:0016055	Wnt signaling pathway	30	4	8.07	0.96076
GO:1902531	regulation of intracellular signal trans...	46	15	12.37	0.96113
GO:0006352	DNA-templated transcription, initiation	31	5	8.34	0.96215
GO:0002009	morphogenesis of an epithelium	8	0	2.15	0.96248
GO:0040029	regulation of gene expression, epigeneti...	20	7	5.38	0.96288
GO:0016458	gene silencing	39	9	10.49	0.9631
GO:0006289	nucleotide-excision repair	18	2	4.84	0.96335
GO:0046131	pyrimidine ribonucleoside metabolic proc...	11	3	2.96	0.96445
GO:0046128	purine ribonucleoside metabolic process	20	2	5.38	0.96479
GO:0009225	nucleotide-sugar metabolic process	10	3	2.69	0.96564
GO:0009074	aromatic amino acid family catabolic pro...	8	1	2.15	0.96871
GO:0006576	cellular biogenic amine metabolic proces...	13	1	3.5	0.96879
GO:0070925	organelle assembly	64	16	17.21	0.96898
GO:1901700	response to oxygen-containing compound	18	7	4.84	0.96924
GO:0042454	ribonucleoside catabolic process	6	0	1.61	0.96987
GO:0006013	mannose metabolic process	5	1	1.34	0.97132
GO:0016571	histone methylation	16	2	4.3	0.97161
GO:0072523	purine-containing compound catabolic pro...	9	1	2.42	0.97278
GO:0006220	pyrimidine nucleotide metabolic process	15	4	4.03	0.97365
GO:0010876	lipid localization	59	14	15.87	0.97375
GO:0030071	regulation of mitotic metaphase/anaphase...	9	0	2.42	0.97437
GO:0043631	RNA polyadenylation	5	0	1.34	0.97467
GO:0006081	cellular aldehyde metabolic process	15	4	4.03	0.97589
GO:0009262	deoxyribonucleotide metabolic process	6	0	1.61	0.9775
GO:0031400	negative regulation of protein modificat...	8	1	2.15	0.97844
GO:0045936	negative regulation of phosphate metabol...	8	1	2.15	0.97844
GO:1901617	organic hydroxy compound biosynthetic pr...	23	7	6.19	0.97918
GO:0006101	citrate metabolic process	24	4	6.45	0.97948
GO:0046700	heterocycle catabolic process	75	12	20.17	0.98138
GO:0007169	transmembrane receptor protein tyrosine ...	13	2	3.5	0.98302
GO:0008152	metabolic process	4168	1067	1120.96	0.98309
GO:0070988	demethylation	7	1	1.88	0.9846
GO:0044270	cellular nitrogen compound catabolic pro...	73	12	19.63	0.98508
GO:0006400	tRNA modification	37	7	9.95	0.98594
GO:0010243	response to organonitrogen compound	10	2	2.69	0.986
GO:0006030	chitin metabolic process	53	13	14.25	0.98643
GO:0006388	tRNA splicing, via endonucleolytic cleav...	5	1	1.34	0.98645
GO:0006497	protein lipidation	25	1	6.72	0.98651
GO:0043543	protein acylation	18	2	4.84	0.9866
GO:0000184	nuclear-transcribed mRNA catabolic proce...	11	0	2.96	0.98668
GO:0009130	pyrimidine nucleoside monophosphate bios...	7	3	1.88	0.98739
GO:1901565	organonitrogen compound catabolic proces...	156	42	41.96	0.98823
GO:0030203	glycosaminoglycan metabolic process	11	2	2.96	0.98868
GO:0019439	aromatic compound catabolic process	79	13	21.25	0.98876
GO:0007165	signal transduction	652	175	175.35	0.98905
GO:0006486	protein glycosylation	75	12	20.17	0.98964
GO:0051301	cell division	56	12	15.06	0.98988
GO:0035303	regulation of dephosphorylation	14	2	3.77	0.99035
GO:0070838	divalent metal ion transport	45	18	12.1	0.99061
GO:0051169	nuclear transport	36	5	9.68	0.99072
GO:0071702	organic substance transport	333	83	89.56	0.99217
GO:0032366	intracellular sterol transport	11	2	2.96	0.99222
GO:0006418	tRNA aminoacylation for protein translat...	42	8	11.3	0.9923
GO:0016573	histone acetylation	15	1	4.03	0.99297
GO:0008299	isoprenoid biosynthetic process	16	2	4.3	0.99308
GO:0003008	system process	79	17	21.25	0.99381
GO:0048477	oogenesis	9	2	2.42	0.99414
GO:0050911	detection of chemical stimulus involved ...	23	3	6.19	0.9943
GO:0019318	hexose metabolic process	33	10	8.88	0.99447
GO:0044283	small molecule biosynthetic process	111	34	29.85	0.99456
GO:0072525	pyridine-containing compound biosyntheti...	9	0	2.42	0.99464
GO:0016180	snRNA processing	8	1	2.15	0.9947
GO:0048522	positive regulation of cellular process	106	23	28.51	0.99471
GO:0007064	mitotic sister chromatid cohesion	5	0	1.34	0.99506
GO:0071705	nitrogen compound transport	269	67	72.35	0.99512
GO:0043632	modification-dependent macromolecule cat...	77	24	20.71	0.99515
GO:0016236	macroautophagy	5	0	1.34	0.99528
GO:0000122	negative regulation of transcription fro...	8	2	2.15	0.99542
GO:0044093	positive regulation of molecular functio...	83	20	22.32	0.99606
GO:0032879	regulation of localization	38	16	10.22	0.99607
GO:0031175	neuron projection development	22	8	5.92	0.99622
GO:0006357	regulation of transcription from RNA pol...	155	23	41.69	0.99632
GO:0031123	RNA 3'-end processing	11	1	2.96	0.99668
GO:0006508	proteolysis	724	167	194.72	0.99717
GO:0006354	DNA-templated transcription, elongation	14	4	3.77	0.99776
GO:0006355	regulation of transcription, DNA-templat...	447	76	120.22	0.9978
GO:0006913	nucleocytoplasmic transport	35	5	9.41	0.99783
GO:0009966	regulation of signal transduction	81	21	21.78	0.99796
GO:0000956	nuclear-transcribed mRNA catabolic proce...	26	3	6.99	0.99799
GO:0042168	heme metabolic process	14	5	3.77	0.99808
GO:0043039	tRNA aminoacylation	44	8	11.83	0.99827
GO:0033674	positive regulation of kinase activity	10	2	2.69	0.99833
GO:0000154	rRNA modification	11	1	2.96	0.99853
GO:0007275	multicellular organism development	165	37	44.38	0.9987
GO:0006473	protein acetylation	17	2	4.57	0.99881
GO:0007088	regulation of mitotic nuclear division	10	0	2.69	0.99898
GO:0007033	vacuole organization	9	1	2.42	0.99905
GO:0007051	spindle organization	5	0	1.34	0.99913
GO:0010256	endomembrane system organization	16	3	4.3	0.99915
GO:0009060	aerobic respiration	24	4	6.45	0.99921
GO:0036065	fucosylation	6	1	1.61	0.99922
GO:0010638	positive regulation of organelle organiz...	20	7	5.38	0.9993
GO:0035246	peptidyl-arginine N-methylation	10	0	2.69	0.99936
GO:0016255	attachment of GPI anchor to protein	5	0	1.34	0.99945
GO:0044257	cellular protein catabolic process	85	26	22.86	0.99953
GO:0033044	regulation of chromosome organization	12	0	3.23	0.99965
GO:0032006	regulation of TOR signaling	12	3	3.23	0.99965
GO:0006732	coenzyme metabolic process	76	20	20.44	0.99968
GO:0015986	ATP synthesis coupled proton transport	16	1	4.3	0.99981
GO:0045935	positive regulation of nucleobase-contai...	27	2	7.26	0.99982
GO:0000723	telomere maintenance	9	1	2.42	0.99983
GO:0009150	purine ribonucleotide metabolic process	98	22	26.36	0.99984
GO:0006996	organelle organization	418	107	112.42	0.99988
GO:0009263	deoxyribonucleotide biosynthetic process	5	0	1.34	0.99989
GO:0046394	carboxylic acid biosynthetic process	77	20	20.71	0.99995
GO:0043241	protein complex disassembly	19	6	5.11	0.99997
GO:0009435	NAD biosynthetic process	5	0	1.34	0.99997
GO:0071310	cellular response to organic substance	29	5	7.8	0.99999
GO:0009124	nucleoside monophosphate biosynthetic pr...	44	9	11.83	1
GO:0009069	serine family amino acid metabolic proce...	15	3	4.03	1
GO:0051493	regulation of cytoskeleton organization	37	16	9.95	1
GO:0009199	ribonucleoside triphosphate metabolic pr...	62	13	16.67	1
GO:0072655	establishment of protein localization to...	15	7	4.03	1
GO:0030041	actin filament polymerization	26	10	6.99	1
GO:0043102	amino acid salvage	6	1	1.61	1
GO:0030031	cell projection assembly	38	12	10.22	1
GO:0009161	ribonucleoside monophosphate metabolic p...	75	18	20.17	1
GO:0009163	nucleoside biosynthetic process	16	4	4.3	1
GO:0009164	nucleoside catabolic process	6	0	1.61	1
GO:0022412	cellular process involved in reproductio...	11	4	2.96	1
GO:0022414	reproductive process	36	9	9.68	1
GO:0070085	glycosylation	81	13	21.78	1
GO:0000819	sister chromatid segregation	27	3	7.26	1
GO:0016053	organic acid biosynthetic process	77	20	20.71	1
GO:0016054	organic acid catabolic process	34	6	9.14	1
GO:2001141	regulation of RNA biosynthetic process	458	77	123.18	1
GO:0009185	ribonucleoside diphosphate metabolic pro...	15	5	4.03	1
GO:0009187	cyclic nucleotide metabolic process	23	8	6.19	1
GO:0000303	response to superoxide	8	3	2.15	1
GO:0030003	cellular cation homeostasis	20	6	5.38	1
GO:0033559	unsaturated fatty acid metabolic process	6	3	1.61	1
GO:0046068	cGMP metabolic process	14	2	3.77	1
GO:0000305	response to oxygen radical	8	3	2.15	1
GO:0042391	regulation of membrane potential	10	5	2.69	1
GO:0032269	negative regulation of cellular protein ...	70	14	18.83	1
GO:0007091	metaphase/anaphase transition of mitotic...	9	0	2.42	1
GO:0009173	pyrimidine ribonucleoside monophosphate ...	5	3	1.34	1
GO:0009174	pyrimidine ribonucleoside monophosphate ...	5	3	1.34	1
GO:0090662	ATP hydrolysis coupled transmembrane tra...	17	13	4.57	1
GO:0071715	icosanoid transport	8	3	2.15	1
GO:0046501	protoporphyrinogen IX metabolic process	7	2	1.88	1
GO:0016073	snRNA metabolic process	8	1	2.15	1
GO:0006213	pyrimidine nucleoside metabolic process	11	3	2.96	1
GO:0009123	nucleoside monophosphate metabolic proce...	81	19	21.78	1
GO:0007409	axonogenesis	21	8	5.65	1
GO:0009126	purine nucleoside monophosphate metaboli...	69	15	18.56	1
GO:0009127	purine nucleoside monophosphate biosynth...	35	6	9.41	1
GO:1901381	positive regulation of potassium ion tra...	11	2	2.96	1
GO:0009129	pyrimidine nucleoside monophosphate meta...	7	3	1.88	1
GO:0000910	cytokinesis	11	4	2.96	1
GO:0043266	regulation of potassium ion transport	11	2	2.96	1
GO:0043268	positive regulation of potassium ion tra...	11	2	2.96	1
GO:0009112	nucleobase metabolic process	14	6	3.77	1
GO:0043269	regulation of ion transport	31	13	8.34	1
GO:1902221	erythrose 4-phosphate/phosphoenolpyruvat...	5	1	1.34	1
GO:1902222	erythrose 4-phosphate/phosphoenolpyruvat...	5	1	1.34	1
GO:0032271	regulation of protein polymerization	26	10	6.99	1
GO:0032272	negative regulation of protein polymeriz...	10	4	2.69	1
GO:0032273	positive regulation of protein polymeriz...	15	5	4.03	1
GO:0009119	ribonucleoside metabolic process	28	5	7.53	1
GO:0022406	membrane docking	11	1	2.96	1
GO:0098542	defense response to other organism	7	4	1.88	1
GO:1901379	regulation of potassium ion transmembran...	11	2	2.96	1
GO:0009142	nucleoside triphosphate biosynthetic pro...	26	3	6.99	1
GO:0009144	purine nucleoside triphosphate metabolic...	59	12	15.87	1
GO:0009145	purine nucleoside triphosphate biosynthe...	23	2	6.19	1
GO:0009148	pyrimidine nucleoside triphosphate biosy...	6	1	1.61	1
GO:0048232	male gamete generation	7	1	1.88	1
GO:0098534	centriole assembly	7	3	1.88	1
GO:0009135	purine nucleoside diphosphate metabolic ...	15	5	4.03	1
GO:0043270	positive regulation of ion transport	11	2	2.96	1
GO:0031323	regulation of cellular metabolic process	616	115	165.67	1
GO:1905114	cell surface receptor signaling pathway ...	40	9	10.76	1
GO:0031324	negative regulation of cellular metaboli...	109	20	29.32	1
GO:0120031	plasma membrane bounded cell projection ...	38	12	10.22	1
GO:0031325	positive regulation of cellular metaboli...	54	8	14.52	1
GO:0031326	regulation of cellular biosynthetic proc...	502	88	135.01	1
GO:1901880	negative regulation of protein depolymer...	8	2	2.15	1
GO:0046040	IMP metabolic process	7	2	1.88	1
GO:0071704	organic substance metabolic process	3534	904	950.45	1
GO:0097237	cellular response to toxic substance	34	16	9.14	1
GO:0002097	tRNA wobble base modification	10	4	2.69	1
GO:0120039	plasma membrane bounded cell projection ...	21	8	5.65	1
GO:0046049	UMP metabolic process	5	3	1.34	1
GO:0009617	response to bacterium	7	4	1.88	1
GO:0046036	CTP metabolic process	6	1	1.61	1
GO:2000816	negative regulation of mitotic sister ch...	7	0	1.88	1
GO:0000904	cell morphogenesis involved in different...	21	8	5.65	1
GO:0031347	regulation of defense response	10	1	2.69	1
GO:0031349	positive regulation of defense response	10	1	2.69	1
GO:0007167	enzyme linked receptor protein signaling...	26	5	6.99	1
GO:0042327	positive regulation of phosphorylation	12	3	3.23	1
GO:1903509	liposaccharide metabolic process	25	1	6.72	1
GO:0005976	polysaccharide metabolic process	7	2	1.88	1
GO:0043242	negative regulation of protein complex d...	8	2	2.15	1
GO:0031333	negative regulation of protein complex a...	10	4	2.69	1
GO:0031334	positive regulation of protein complex a...	15	5	4.03	1
GO:0009636	response to toxic substance	34	16	9.14	1
GO:0050776	regulation of immune response	10	1	2.69	1
GO:0050778	positive regulation of immune response	10	1	2.69	1
GO:0042886	amide transport	227	56	61.05	1

## Sheet: GO Enrichment MF
GO.ID	Term	Annotated	Significant	Expected	weight01KS
GO:0003735	structural constituent of ribosome	141	108	36.83	< 1e-30
GO:0009881	photoreceptor activity	12	8	3.13	0.00024
GO:0005216	ion channel activity	167	64	43.62	0.00142
GO:0005230	extracellular ligand-gated ion channel a...	46	25	12.01	0.00221
GO:0004930	G-protein coupled receptor activity	123	43	32.13	0.00298
GO:0008194	UDP-glycosyltransferase activity	56	12	14.63	0.00312
GO:0015035	protein disulfide oxidoreductase activit...	10	6	2.61	0.00444
GO:0004144	diacylglycerol O-acyltransferase activit...	6	5	1.57	0.00456
GO:0008569	ATP-dependent microtubule motor activity...	12	7	3.13	0.00503
GO:0004890	GABA-A receptor activity	5	4	1.31	0.00552
GO:0016758	transferase activity, transferring hexos...	93	21	24.29	0.00778
GO:0019843	rRNA binding	13	8	3.4	0.0082
GO:0050662	coenzyme binding	138	31	36.04	0.00854
GO:0008017	microtubule binding	49	22	12.8	0.00893
GO:0070122	isopeptidase activity	9	6	2.35	0.009
GO:1901681	sulfur compound binding	16	8	4.18	0.01409
GO:0003924	GTPase activity	128	39	33.43	0.01434
GO:0046961	proton-transporting ATPase activity, rot...	8	6	2.09	0.01446
GO:0008138	protein tyrosine/serine/threonine phosph...	13	8	3.4	0.01593
GO:0070573	metallodipeptidase activity	8	6	2.09	0.0189
GO:0022848	acetylcholine-gated cation-selective cha...	10	5	2.61	0.01998
GO:0004970	ionotropic glutamate receptor activity	20	10	5.22	0.0209
GO:0008320	protein transmembrane transporter activi...	5	1	1.31	0.02274
GO:0003743	translation initiation factor activity	47	20	12.28	0.02365
GO:0004623	phospholipase A2 activity	8	3	2.09	0.03057
GO:0005328	neurotransmitter:sodium symporter activi...	19	10	4.96	0.03234
GO:0008483	transaminase activity	14	2	3.66	0.03543
GO:0003777	microtubule motor activity	41	20	10.71	0.03658
GO:0005525	GTP binding	179	54	46.75	0.04115
GO:0015293	symporter activity	30	17	7.84	0.04135
GO:0008026	ATP-dependent helicase activity	18	6	4.7	0.04179
GO:0032574	5'-3' RNA helicase activity	7	5	1.83	0.04336
GO:0004784	superoxide dismutase activity	8	3	2.09	0.04409
GO:0030234	enzyme regulator activity	152	34	39.7	0.04548
GO:0004843	thiol-dependent ubiquitin-specific prote...	33	14	8.62	0.04641
GO:0008641	ubiquitin-like modifier activating enzym...	9	3	2.35	0.04807
GO:0015297	antiporter activity	17	9	4.44	0.04968
GO:0004364	glutathione transferase activity	5	3	1.31	0.04973
GO:0005506	iron ion binding	192	65	50.15	0.05017
GO:0008565	protein transporter activity	16	7	4.18	0.05099
GO:0019842	vitamin binding	60	20	15.67	0.05286
GO:0016840	carbon-nitrogen lyase activity	9	5	2.35	0.05604
GO:0005249	voltage-gated potassium channel activity	18	9	4.7	0.0582
GO:0031072	heat shock protein binding	6	2	1.57	0.05927
GO:0051920	peroxiredoxin activity	6	4	1.57	0.06332
GO:0016638	oxidoreductase activity, acting on the C...	10	4	2.61	0.06381
GO:0015299	solute:proton antiporter activity	5	3	1.31	0.06393
GO:0016717	oxidoreductase activity, acting on paire...	7	4	1.83	0.06454
GO:0099516	ion antiporter activity	8	5	2.09	0.06749
GO:0004715	non-membrane spanning protein tyrosine k...	9	5	2.35	0.06786
GO:0004114	3',5'-cyclic-nucleotide phosphodiesteras...	11	5	2.87	0.06804
GO:0016755	transferase activity, transferring amino...	10	4	2.61	0.06903
GO:0016646	oxidoreductase activity, acting on the C...	11	4	2.87	0.07001
GO:0015081	sodium ion transmembrane transporter act...	56	17	14.63	0.07179
GO:0015491	cation:cation antiporter activity	6	3	1.57	0.07192
GO:0102567	phospholipase A2 activity (consuming 1,2...	6	1	1.57	0.07316
GO:0102568	phospholipase A2 activity consuming 1,2-...	6	1	1.57	0.07316
GO:0008536	Ran GTPase binding	15	5	3.92	0.07407
GO:0042302	structural constituent of cuticle	190	50	49.63	0.07569
GO:0004601	peroxidase activity	24	11	6.27	0.07655
GO:0008312	7S RNA binding	6	3	1.57	0.07736
GO:0098772	molecular function regulator	249	63	65.04	0.07999
GO:0008237	metallopeptidase activity	162	56	42.31	0.08076
GO:0004497	monooxygenase activity	169	57	44.14	0.08396
GO:0005184	neuropeptide hormone activity	12	6	3.13	0.08682
GO:0005245	voltage-gated calcium channel activity	6	4	1.57	0.08945
GO:0016917	GABA receptor activity	9	7	2.35	0.09094
GO:0004143	diacylglycerol kinase activity	7	2	1.83	0.09316
GO:0005488	binding	5847	1479	1527.17	0.09367
GO:0003729	mRNA binding	24	10	6.27	0.09403
GO:0016462	pyrophosphatase activity	461	142	120.41	0.09572
GO:0008173	RNA methyltransferase activity	33	5	8.62	0.10155
GO:0060590	ATPase regulator activity	9	5	2.35	0.10297
GO:0004983	neuropeptide Y receptor activity	9	2	2.35	0.10419
GO:0016868	intramolecular transferase activity, pho...	6	3	1.57	0.10693
GO:0008135	translation factor activity, RNA binding	70	30	18.28	0.10893
GO:0070006	metalloaminopeptidase activity	14	7	3.66	0.11012
GO:0008233	peptidase activity	627	147	163.77	0.1172
GO:0051082	unfolded protein binding	28	4	7.31	0.1173
GO:0005048	signal sequence binding	5	2	1.31	0.11854
GO:0004725	protein tyrosine phosphatase activity	36	10	9.4	0.11963
GO:0016853	isomerase activity	77	12	20.11	0.12167
GO:0016279	protein-lysine N-methyltransferase activ...	16	5	4.18	0.12372
GO:0005200	structural constituent of cytoskeleton	17	7	4.44	0.12461
GO:0004176	ATP-dependent peptidase activity	5	3	1.31	0.12626
GO:0004198	calcium-dependent cysteine-type endopept...	9	4	2.35	0.13168
GO:0022857	transmembrane transporter activity	570	194	148.88	0.13232
GO:0016836	hydro-lyase activity	35	10	9.14	0.13286
GO:0043168	anion binding	1158	325	302.46	0.13453
GO:0005515	protein binding	1988	539	519.24	0.13694
GO:0031369	translation initiation factor binding	5	3	1.31	0.13832
GO:0015036	disulfide oxidoreductase activity	11	7	2.87	0.13875
GO:0004222	metalloendopeptidase activity	65	17	16.98	0.14061
GO:0004672	protein kinase activity	241	78	62.95	0.14405
GO:1901363	heterocyclic compound binding	3019	724	788.53	0.1455
GO:0004722	protein serine/threonine phosphatase act...	16	5	4.18	0.14787
GO:0003995	acyl-CoA dehydrogenase activity	10	4	2.61	0.14892
GO:0005215	transporter activity	622	210	162.46	0.14898
GO:0015267	channel activity	175	68	45.71	0.15122
GO:0005267	potassium channel activity	31	14	8.1	0.15166
GO:0036402	proteasome-activating ATPase activity	6	3	1.57	0.15257
GO:0000976	transcription regulatory region sequence...	10	3	2.61	0.1532
GO:0001882	nucleoside binding	184	55	48.06	0.15349
GO:0016209	antioxidant activity	34	15	8.88	0.1564
GO:0019904	protein domain specific binding	17	8	4.44	0.15667
GO:0016740	transferase activity	1066	264	278.43	0.15804
GO:0016811	hydrolase activity, acting on carbon-nit...	30	8	7.84	0.15946
GO:0017137	Rab GTPase binding	9	4	2.35	0.16344
GO:0005524	ATP binding	784	226	204.77	0.16414
GO:0016829	lyase activity	119	37	31.08	0.16441
GO:0003779	actin binding	97	32	25.34	0.16673
GO:0004674	protein serine/threonine kinase activity	120	39	31.34	0.16761
GO:0019706	protein-cysteine S-palmitoyltransferase ...	10	3	2.61	0.1708
GO:0019205	nucleobase-containing compound kinase ac...	18	6	4.7	0.17108
GO:0019900	kinase binding	8	2	2.09	0.17651
GO:0016705	oxidoreductase activity, acting on paire...	187	62	48.84	0.17707
GO:0016790	thiolester hydrolase activity	13	4	3.4	0.18375
GO:0101005	ubiquitinyl hydrolase activity	36	15	9.4	0.18743
GO:0008137	NADH dehydrogenase (ubiquinone) activity	13	1	3.4	0.18878
GO:0046914	transition metal ion binding	958	236	250.22	0.18909
GO:0005086	ARF guanyl-nucleotide exchange factor ac...	6	3	1.57	0.19234
GO:0020037	heme binding	183	58	47.8	0.19893
GO:0000062	fatty-acyl-CoA binding	5	1	1.31	0.20133
GO:0140101	catalytic activity, acting on a tRNA	82	14	21.42	0.20153
GO:0019789	SUMO transferase activity	5	3	1.31	0.20246
GO:0008195	phosphatidate phosphatase activity	5	0	1.31	0.20416
GO:0030414	peptidase inhibitor activity	51	9	13.32	0.20555
GO:0004888	transmembrane signaling receptor activit...	238	80	62.16	0.20844
GO:0016701	oxidoreductase activity, acting on singl...	11	6	2.87	0.20853
GO:0016298	lipase activity	59	15	15.41	0.20952
GO:0015294	solute:cation symporter activity	23	12	6.01	0.22679
GO:0015108	chloride transmembrane transporter activ...	12	6	3.13	0.22747
GO:0022853	active ion transmembrane transporter act...	23	10	6.01	0.22752
GO:0008174	mRNA methyltransferase activity	6	1	1.57	0.22834
GO:0016667	oxidoreductase activity, acting on a sul...	22	8	5.75	0.22933
GO:0004707	MAP kinase activity	5	1	1.31	0.22986
GO:0008408	3'-5' exonuclease activity	20	6	5.22	0.22992
GO:0035591	signaling adaptor activity	6	2	1.57	0.23536
GO:0016702	oxidoreductase activity, acting on singl...	10	5	2.61	0.23631
GO:0030145	manganese ion binding	12	5	3.13	0.23699
GO:0051539	4 iron, 4 sulfur cluster binding	27	6	7.05	0.2408
GO:0003746	translation elongation factor activity	21	8	5.48	0.2444
GO:0030276	clathrin binding	7	2	1.83	0.24529
GO:0030545	receptor regulator activity	46	14	12.01	0.24722
GO:0032561	guanyl ribonucleotide binding	182	54	47.54	0.2487
GO:0019899	enzyme binding	108	30	28.21	0.25206
GO:0030695	GTPase regulator activity	46	10	12.01	0.25299
GO:0022836	gated channel activity	97	42	25.34	0.25312
GO:0042623	ATPase activity, coupled	123	43	32.13	0.25651
GO:0008375	acetylglucosaminyltransferase activity	12	3	3.13	0.2601
GO:0001671	ATPase activator activity	5	3	1.31	0.26294
GO:0033218	amide binding	16	6	4.18	0.27479
GO:0016742	hydroxymethyl-, formyl- and related tran...	6	1	1.57	0.27708
GO:0051087	chaperone binding	8	3	2.09	0.27764
GO:0008528	G-protein coupled peptide receptor activ...	27	4	7.05	0.27908
GO:0016409	palmitoyltransferase activity	12	4	3.13	0.28192
GO:0016671	oxidoreductase activity, acting on a sul...	5	1	1.31	0.285
GO:0097367	carbohydrate derivative binding	1088	306	284.17	0.28512
GO:0005509	calcium ion binding	176	48	45.97	0.28689
GO:0003993	acid phosphatase activity	7	3	1.83	0.2906
GO:0005262	calcium channel activity	20	9	5.22	0.29103
GO:0004177	aminopeptidase activity	42	17	10.97	0.29238
GO:0003774	motor activity	66	28	17.24	0.29668
GO:0004525	ribonuclease III activity	5	2	1.31	0.29885
GO:0008242	omega peptidase activity	10	3	2.61	0.30434
GO:0061733	peptide-lysine-N-acetyltransferase activ...	11	2	2.87	0.3082
GO:0005088	Ras guanyl-nucleotide exchange factor ac...	12	4	3.13	0.31231
GO:0016888	endodeoxyribonuclease activity, producin...	8	4	2.09	0.31464
GO:0030554	adenyl nucleotide binding	790	226	206.34	0.31916
GO:0050660	flavin adenine dinucleotide binding	81	18	21.16	0.32495
GO:0005254	chloride channel activity	8	4	2.09	0.32531
GO:0003690	double-stranded DNA binding	24	6	6.27	0.32993
GO:0016887	ATPase activity	178	60	46.49	0.33062
GO:0000287	magnesium ion binding	41	13	10.71	0.33237
GO:0005543	phospholipid binding	43	8	11.23	0.33413
GO:0015085	calcium ion transmembrane transporter ac...	26	11	6.79	0.33497
GO:0099094	ligand-gated cation channel activity	16	8	4.18	0.33592
GO:0042277	peptide binding	9	3	2.35	0.33975
GO:0019888	protein phosphatase regulator activity	9	1	2.35	0.34283
GO:0042802	identical protein binding	9	3	2.35	0.34649
GO:0030170	pyridoxal phosphate binding	39	11	10.19	0.34862
GO:0016709	oxidoreductase activity, acting on paire...	9	3	2.35	0.34908
GO:0003906	DNA-(apurinic or apyrimidinic site) lyas...	5	2	1.31	0.34952
GO:0005244	voltage-gated ion channel activity	36	17	9.4	0.35438
GO:0047522	15-oxoprostaglandin 13-oxidase activity	5	2	1.31	0.35803
GO:0036132	13-prostaglandin reductase activity	5	2	1.31	0.35803
GO:0032440	2-alkenal reductase [NAD(P)] activity	5	2	1.31	0.35803
GO:0102148	N-acetyl-beta-D-galactosaminidase activi...	5	2	1.31	0.36044
GO:0004563	beta-N-acetylhexosaminidase activity	5	2	1.31	0.36044
GO:0015079	potassium ion transmembrane transporter ...	35	16	9.14	0.36105
GO:0140097	catalytic activity, acting on DNA	76	19	19.85	0.36194
GO:0003899	DNA-directed 5'-3' RNA polymerase activi...	32	7	8.36	0.36206
GO:0052745	inositol phosphate phosphatase activity	6	2	1.57	0.36431
GO:0003712	transcription cofactor activity	47	12	12.28	0.36605
GO:0097159	organic cyclic compound binding	3021	724	789.05	0.36699
GO:0000166	nucleotide binding	1121	310	292.79	0.37302
GO:0003954	NADH dehydrogenase activity	14	1	3.66	0.37403
GO:0042578	phosphoric ester hydrolase activity	139	35	36.31	0.37427
GO:0016849	phosphorus-oxygen lyase activity	24	6	6.27	0.37883
GO:0004620	phospholipase activity	27	7	7.05	0.38142
GO:0008081	phosphoric diester hydrolase activity	27	9	7.05	0.38491
GO:0008170	N-methyltransferase activity	39	8	10.19	0.38526
GO:0018024	histone-lysine N-methyltransferase activ...	12	2	3.13	0.38624
GO:0004675	transmembrane receptor protein serine/th...	7	2	1.83	0.38692
GO:0051536	iron-sulfur cluster binding	55	14	14.37	0.38744
GO:0034061	DNA polymerase activity	9	3	2.35	0.38892
GO:0032403	protein complex binding	42	13	10.97	0.38906
GO:0050839	cell adhesion molecule binding	7	2	1.83	0.39297
GO:0004016	adenylate cyclase activity	6	3	1.57	0.39539
GO:0016831	carboxy-lyase activity	26	9	6.79	0.39756
GO:0004536	deoxyribonuclease activity	15	5	3.92	0.39958
GO:0015405	P-P-bond-hydrolysis-driven transmembrane...	70	20	18.28	0.40044
GO:0032549	ribonucleoside binding	183	54	47.8	0.40426
GO:0004089	carbonate dehydratase activity	15	4	3.92	0.41141
GO:0015078	hydrogen ion transmembrane transporter a...	49	18	12.8	0.41394
GO:0000179	rRNA (adenine-N6,N6-)-dimethyltransferas...	6	1	1.57	0.41405
GO:0016411	acylglycerol O-acyltransferase activity	10	6	2.61	0.41916
GO:0016842	amidine-lyase activity	5	2	1.31	0.42039
GO:0015291	secondary active transmembrane transport...	61	31	15.93	0.42064
GO:0016645	oxidoreductase activity, acting on the C...	13	4	3.4	0.4213
GO:0070008	serine-type exopeptidase activity	8	1	2.09	0.42256
GO:0008235	metalloexopeptidase activity	49	21	12.8	0.43263
GO:0004659	prenyltransferase activity	10	3	2.61	0.43646
GO:0046872	metal ion binding	1824	473	476.41	0.43905
GO:0008308	voltage-gated anion channel activity	6	2	1.57	0.44368
GO:0035091	phosphatidylinositol binding	27	2	7.05	0.4455
GO:0005198	structural molecule activity	387	173	101.08	0.44658
GO:0005544	calcium-dependent phospholipid binding	10	4	2.61	0.44682
GO:0015464	acetylcholine receptor activity	12	6	3.13	0.4488
GO:0003887	DNA-directed DNA polymerase activity	8	3	2.09	0.45314
GO:0030551	cyclic nucleotide binding	5	0	1.31	0.45678
GO:0043169	cation binding	1830	475	477.98	0.46243
GO:0004519	endonuclease activity	44	14	11.49	0.46582
GO:0008092	cytoskeletal protein binding	162	54	42.31	0.47548
GO:0015932	nucleobase-containing compound transmemb...	28	8	7.31	0.47565
GO:0008324	cation transmembrane transporter activit...	200	70	52.24	0.47683
GO:0015662	ATPase activity, coupled to transmembran...	5	2	1.31	0.47812
GO:0030983	mismatched DNA binding	5	2	1.31	0.47843
GO:0009055	electron transfer activity	46	11	12.01	0.47851
GO:0019829	cation-transporting ATPase activity	19	8	4.96	0.47879
GO:0017048	Rho GTPase binding	20	6	5.22	0.48464
GO:0102965	alcohol-forming fatty acyl-CoA reductase...	24	7	6.27	0.48967
GO:0004721	phosphoprotein phosphatase activity	63	19	16.45	0.49044
GO:0005539	glycosaminoglycan binding	7	3	1.83	0.49247
GO:0005347	ATP transmembrane transporter activity	19	6	4.96	0.49254
GO:0004185	serine-type carboxypeptidase activity	7	1	1.83	0.49686
GO:0004518	nuclease activity	75	21	19.59	0.49899
GO:0043130	ubiquitin binding	6	1	1.57	0.49912
GO:0061134	peptidase regulator activity	53	10	13.84	0.5003
GO:0016765	transferase activity, transferring alkyl...	25	9	6.53	0.50068
GO:0004312	fatty acid synthase activity	8	2	2.09	0.50092
GO:0003713	transcription coactivator activity	12	2	3.13	0.501
GO:0016796	exonuclease activity, active with either...	12	0	3.13	0.50373
GO:0004553	hydrolase activity, hydrolyzing O-glycos...	86	24	22.46	0.50539
GO:0004190	aspartic-type endopeptidase activity	12	1	3.13	0.50959
GO:0003824	catalytic activity	3696	959	965.35	0.51055
GO:0008409	5'-3' exonuclease activity	6	0	1.57	0.516
GO:0016896	exoribonuclease activity, producing 5'-p...	9	0	2.35	0.52392
GO:0080019	fatty-acyl-CoA reductase (alcohol-formin...	27	8	7.05	0.52443
GO:0017111	nucleoside-triphosphatase activity	447	138	116.75	0.5296
GO:0016491	oxidoreductase activity	646	182	168.73	0.53054
GO:0002161	aminoacyl-tRNA editing activity	7	1	1.83	0.53288
GO:0000977	RNA polymerase II regulatory region sequ...	6	1	1.57	0.53336
GO:0016776	phosphotransferase activity, phosphate g...	12	4	3.13	0.53363
GO:0016628	oxidoreductase activity, acting on the C...	14	4	3.66	0.53443
GO:0046933	proton-transporting ATP synthase activit...	11	3	2.87	0.53444
GO:0090482	vitamin transmembrane transporter activi...	5	0	1.31	0.53725
GO:0022804	active transmembrane transporter activit...	132	51	34.48	0.53836
GO:0016835	carbon-oxygen lyase activity	41	12	10.71	0.53971
GO:0016782	transferase activity, transferring sulfu...	35	8	9.14	0.54378
GO:0004298	threonine-type endopeptidase activity	15	5	3.92	0.54465
GO:0036094	small molecule binding	1188	329	310.29	0.5452
GO:0016798	hydrolase activity, acting on glycosyl b...	113	30	29.51	0.54648
GO:0009982	pseudouridine synthase activity	9	1	2.35	0.54783
GO:0031177	phosphopantetheine binding	6	2	1.57	0.55014
GO:0004315	3-oxoacyl-[acyl-carrier-protein] synthas...	6	1	1.57	0.55014
GO:0015631	tubulin binding	62	23	16.19	0.55172
GO:0003678	DNA helicase activity	32	6	8.36	0.55354
GO:0016787	hydrolase activity	1676	435	437.75	0.55452
GO:0004180	carboxypeptidase activity	40	12	10.45	0.55727
GO:0005201	extracellular matrix structural constitu...	5	0	1.31	0.56422
GO:0043492	ATPase activity, coupled to movement of ...	70	20	18.28	0.56771
GO:0017016	Ras GTPase binding	45	15	11.75	0.57483
GO:0019200	carbohydrate kinase activity	10	1	2.61	0.57517
GO:0004698	calcium-dependent protein kinase C activ...	5	0	1.31	0.59451
GO:0043015	gamma-tubulin binding	5	0	1.31	0.59451
GO:0004181	metallocarboxypeptidase activity	26	8	6.79	0.59719
GO:0031625	ubiquitin protein ligase binding	7	1	1.83	0.59785
GO:0008199	ferric iron binding	8	3	2.09	0.59954
GO:0004322	ferroxidase activity	8	3	2.09	0.59954
GO:0005085	guanyl-nucleotide exchange factor activi...	54	14	14.1	0.59971
GO:0003951	NAD+ kinase activity	10	2	2.61	0.59974
GO:0016861	intramolecular oxidoreductase activity, ...	7	2	1.83	0.60427
GO:0016295	myristoyl-[acyl-carrier-protein] hydrola...	5	1	1.31	0.60779
GO:0016296	palmitoyl-[acyl-carrier-protein] hydrola...	5	1	1.31	0.60779
GO:0004320	oleoyl-[acyl-carrier-protein] hydrolase ...	5	1	1.31	0.60779
GO:0003796	lysozyme activity	6	1	1.57	0.61199
GO:0004500	dopamine beta-monooxygenase activity	5	2	1.31	0.61601
GO:0072341	modified amino acid binding	8	2	2.09	0.62034
GO:0008289	lipid binding	71	16	18.54	0.62102
GO:0008188	neuropeptide receptor activity	16	2	4.18	0.62155
GO:0016651	oxidoreductase activity, acting on NAD(P...	27	2	7.05	0.62264
GO:0070403	NAD+ binding	6	2	1.57	0.62377
GO:0036374	glutathione hydrolase activity	6	2	1.57	0.62619
GO:0016715	oxidoreductase activity, acting on paire...	6	2	1.57	0.62665
GO:0051015	actin filament binding	22	7	5.75	0.62675
GO:0008271	secondary active sulfate transmembrane t...	10	3	2.61	0.62926
GO:0046873	metal ion transmembrane transporter acti...	126	44	32.91	0.62938
GO:0004527	exonuclease activity	29	7	7.57	0.63073
GO:0009975	cyclase activity	23	5	6.01	0.63147
GO:0016301	kinase activity	353	106	92.2	0.63263
GO:0016653	oxidoreductase activity, acting on NAD(P...	5	0	1.31	0.63402
GO:0140098	catalytic activity, acting on RNA	221	46	57.72	0.63402
GO:0008241	peptidyl-dipeptidase activity	7	1	1.83	0.63525
GO:0008276	protein methyltransferase activity	34	8	8.88	0.63538
GO:0052866	phosphatidylinositol phosphate phosphata...	10	0	2.61	0.63691
GO:0031406	carboxylic acid binding	10	3	2.61	0.63846
GO:0016747	transferase activity, transferring acyl ...	141	33	36.83	0.63935
GO:0016773	phosphotransferase activity, alcohol gro...	293	87	76.53	0.64274
GO:0008236	serine-type peptidase activity	338	52	88.28	0.64384
GO:0005516	calmodulin binding	12	3	3.13	0.64595
GO:0016418	S-acetyltransferase activity	5	1	1.31	0.64946
GO:0015103	inorganic anion transmembrane transporte...	24	10	6.27	0.64983
GO:0004499	N,N-dimethylaniline monooxygenase activi...	5	1	1.31	0.65135
GO:0016881	acid-amino acid ligase activity	6	2	1.57	0.65175
GO:0004857	enzyme inhibitor activity	62	12	16.19	0.65328
GO:0005487	nucleocytoplasmic transporter activity	5	1	1.31	0.65355
GO:0016620	oxidoreductase activity, acting on the a...	41	11	10.71	0.65604
GO:0019213	deacetylase activity	7	1	1.83	0.658
GO:0004556	alpha-amylase activity	7	1	1.83	0.6585
GO:0103025	alpha-amylase activity (releasing maltoh...	7	1	1.83	0.6585
GO:0016627	oxidoreductase activity, acting on the C...	45	12	11.75	0.65965
GO:0015929	hexosaminidase activity	6	2	1.57	0.66663
GO:0016624	oxidoreductase activity, acting on the a...	6	2	1.57	0.67235
GO:0016846	carbon-sulfur lyase activity	5	1	1.31	0.6736
GO:0008649	rRNA methyltransferase activity	9	1	2.35	0.67501
GO:0140096	catalytic activity, acting on a protein	1125	282	293.84	0.67806
GO:0042803	protein homodimerization activity	6	2	1.57	0.68089
GO:0005319	lipid transporter activity	26	5	6.79	0.681
GO:0043022	ribosome binding	9	2	2.35	0.68233
GO:0016879	ligase activity, forming carbon-nitrogen...	25	6	6.53	0.68759
GO:0019201	nucleotide kinase activity	6	2	1.57	0.68804
GO:0004714	transmembrane receptor protein tyrosine ...	8	2	2.09	0.68824
GO:0044877	macromolecular complex binding	62	17	16.19	0.69153
GO:0061630	ubiquitin protein ligase activity	26	4	6.79	0.69331
GO:0031683	G-protein beta/gamma-subunit complex bin...	6	0	1.57	0.69381
GO:0016788	hydrolase activity, acting on ester bond...	360	85	94.03	0.69534
GO:0016884	carbon-nitrogen ligase activity, with gl...	8	1	2.09	0.69803
GO:0003697	single-stranded DNA binding	13	3	3.4	0.69859
GO:0051537	2 iron, 2 sulfur cluster binding	21	5	5.48	0.70234
GO:0016772	transferase activity, transferring phosp...	435	126	113.62	0.70458
GO:0045182	translation regulator activity	5	2	1.31	0.7046
GO:0004806	triglyceride lipase activity	32	7	8.36	0.70707
GO:0045296	cadherin binding	6	2	1.57	0.70731
GO:0008047	enzyme activator activity	59	14	15.41	0.7077
GO:0004197	cysteine-type endopeptidase activity	24	7	6.27	0.71244
GO:0019203	carbohydrate phosphatase activity	5	1	1.31	0.71715
GO:0036459	thiol-dependent ubiquitinyl hydrolase ac...	35	14	9.14	0.7204
GO:0008374	O-acyltransferase activity	17	6	4.44	0.72296
GO:0034979	NAD-dependent protein deacetylase activi...	5	0	1.31	0.72627
GO:0016891	endoribonuclease activity, producing 5'-...	13	5	3.4	0.72824
GO:0004526	ribonuclease P activity	6	2	1.57	0.72934
GO:0102756	very-long-chain 3-ketoacyl-CoA synthase ...	20	6	5.22	0.7301
GO:0102336	3-oxo-arachidoyl-CoA synthase activity	20	6	5.22	0.7301
GO:0102337	3-oxo-cerotoyl-CoA synthase activity	20	6	5.22	0.7301
GO:0102338	3-oxo-lignoceronyl-CoA synthase activity	20	6	5.22	0.7301
GO:0005044	scavenger receptor activity	7	2	1.83	0.73052
GO:0008757	S-adenosylmethionine-dependent methyltra...	60	12	15.67	0.73381
GO:0046527	glucosyltransferase activity	8	1	2.09	0.73433
GO:0000989	transcription factor activity, transcrip...	48	12	12.54	0.73875
GO:0060090	molecular adaptor activity	17	3	4.44	0.73878
GO:0043021	ribonucleoprotein complex binding	17	3	4.44	0.7434
GO:0038023	signaling receptor activity	264	87	68.95	0.74633
GO:1901505	carbohydrate derivative transmembrane tr...	29	8	7.57	0.7516
GO:0003725	double-stranded RNA binding	5	0	1.31	0.75232
GO:0010181	FMN binding	8	2	2.09	0.75672
GO:0048029	monosaccharide binding	12	2	3.13	0.75818
GO:0046982	protein heterodimerization activity	37	7	9.66	0.75827
GO:0017069	snRNA binding	5	1	1.31	0.76497
GO:0030151	molybdenum ion binding	5	2	1.31	0.76933
GO:0008318	protein prenyltransferase activity	6	1	1.57	0.77058
GO:0016783	sulfurtransferase activity	6	2	1.57	0.77343
GO:0008168	methyltransferase activity	109	27	28.47	0.77406
GO:0008134	transcription factor binding	15	5	3.92	0.77709
GO:0004521	endoribonuclease activity	21	7	5.48	0.77766
GO:0004702	signal transducer, downstream of recepto...	8	2	2.09	0.77822
GO:0070566	adenylyltransferase activity	8	1	2.09	0.77844
GO:0004826	phenylalanine-tRNA ligase activity	7	2	1.83	0.78116
GO:0016763	transferase activity, transferring pento...	15	3	3.92	0.78305
GO:0008514	organic anion transmembrane transporter ...	20	6	5.22	0.78973
GO:0016854	racemase and epimerase activity	7	0	1.83	0.79043
GO:0016417	S-acyltransferase activity	17	4	4.44	0.79196
GO:0008234	cysteine-type peptidase activity	83	26	21.68	0.79921
GO:0004376	glycolipid mannosyltransferase activity	5	0	1.31	0.80175
GO:0000049	tRNA binding	22	6	5.75	0.80189
GO:0005089	Rho guanyl-nucleotide exchange factor ac...	10	3	2.61	0.80305
GO:0005338	nucleotide-sugar transmembrane transport...	5	0	1.31	0.8037
GO:0004535	poly(A)-specific ribonuclease activity	5	0	1.31	0.80425
GO:0031418	L-ascorbic acid binding	7	2	1.83	0.80593
GO:0004129	cytochrome-c oxidase activity	10	2	2.61	0.80657
GO:0016746	transferase activity, transferring acyl ...	171	41	44.66	0.80723
GO:0015075	ion transmembrane transporter activity	307	113	80.18	0.80866
GO:0030674	protein binding, bridging	8	2	2.09	0.80902
GO:0003723	RNA binding	438	121	114.4	0.80962
GO:0005507	copper ion binding	20	5	5.22	0.81001
GO:0016791	phosphatase activity	110	25	28.73	0.812
GO:0004402	histone acetyltransferase activity	10	1	2.61	0.81278
GO:0016706	oxidoreductase activity, acting on paire...	10	3	2.61	0.81355
GO:0016801	hydrolase activity, acting on ether bond...	5	1	1.31	0.81522
GO:0008745	N-acetylmuramoyl-L-alanine amidase activ...	6	2	1.57	0.81733
GO:0016860	intramolecular oxidoreductase activity	14	3	3.66	0.8189
GO:0005484	SNAP receptor activity	8	2	2.09	0.82242
GO:0000030	mannosyltransferase activity	16	2	4.18	0.831
GO:0005096	GTPase activator activity	44	10	11.49	0.83219
GO:0008094	DNA-dependent ATPase activity	21	4	5.48	0.83402
GO:0005272	sodium channel activity	31	4	8.1	0.83932
GO:0016615	malate dehydrogenase activity	5	1	1.31	0.84015
GO:0003755	peptidyl-prolyl cis-trans isomerase acti...	28	1	7.31	0.84295
GO:0000988	transcription factor activity, protein b...	49	12	12.8	0.84393
GO:0004035	alkaline phosphatase activity	7	1	1.83	0.84611
GO:0016407	acetyltransferase activity	43	8	11.23	0.8463
GO:0019239	deaminase activity	11	3	2.87	0.84961
GO:0004842	ubiquitin-protein transferase activity	64	9	16.72	0.84967
GO:0004571	mannosyl-oligosaccharide 1,2-alpha-manno...	5	1	1.31	0.85012
GO:0016874	ligase activity	91	23	23.77	0.8507
GO:0060089	molecular transducer activity	291	92	76.01	0.85285
GO:0008171	O-methyltransferase activity	14	3	3.66	0.85612
GO:0004003	ATP-dependent DNA helicase activity	13	2	3.4	0.8584
GO:0016741	transferase activity, transferring one-c...	116	28	30.3	0.86105
GO:0000339	RNA cap binding	5	0	1.31	0.86377
GO:0004383	guanylate cyclase activity	14	2	3.66	0.86944
GO:0016780	phosphotransferase activity, for other s...	11	2	2.87	0.87007
GO:0003724	RNA helicase activity	55	15	14.37	0.87193
GO:0005261	cation channel activity	94	31	24.55	0.87263
GO:0031409	pigment binding	9	3	2.35	0.87393
GO:0071949	FAD binding	25	4	6.53	0.87497
GO:0005548	phospholipid transporter activity	11	2	2.87	0.87571
GO:0004879	nuclear receptor activity	7	2	1.83	0.87588
GO:0004866	endopeptidase inhibitor activity	46	6	12.01	0.87848
GO:0030246	carbohydrate binding	76	14	19.85	0.87854
GO:0004448	isocitrate dehydrogenase activity	6	0	1.57	0.88032
GO:0008080	N-acetyltransferase activity	35	7	9.14	0.88197
GO:0035251	UDP-glucosyltransferase activity	5	0	1.31	0.88227
GO:0019206	nucleoside kinase activity	5	1	1.31	0.88318
GO:0016799	hydrolase activity, hydrolyzing N-glycos...	7	2	1.83	0.88693
GO:0005102	receptor binding	68	15	17.76	0.88738
GO:0003682	chromatin binding	11	1	2.87	0.88969
GO:0016433	rRNA (adenine) methyltransferase activit...	7	1	1.83	0.88995
GO:0008175	tRNA methyltransferase activity	9	0	2.35	0.8903
GO:0019783	ubiquitin-like protein-specific protease...	36	14	9.4	0.89065
GO:1990837	sequence-specific double-stranded DNA bi...	11	3	2.87	0.89334
GO:0050661	NADP binding	23	4	6.01	0.89539
GO:0042626	ATPase activity, coupled to transmembran...	69	20	18.02	0.89698
GO:0003714	transcription corepressor activity	10	1	2.61	0.89705
GO:0019901	protein kinase binding	7	1	1.83	0.89752
GO:0016779	nucleotidyltransferase activity	65	15	16.98	0.89846
GO:0051183	vitamin transporter activity	7	0	1.83	0.89871
GO:0016641	oxidoreductase activity, acting on the C...	5	1	1.31	0.89945
GO:0008083	growth factor activity	13	3	3.4	0.89957
GO:0004803	transposase activity	5	0	1.31	0.90436
GO:0016810	hydrolase activity, acting on carbon-nit...	52	14	13.58	0.90674
GO:0008484	sulfuric ester hydrolase activity	9	0	2.35	0.91304
GO:0019208	phosphatase regulator activity	11	1	2.87	0.91335
GO:0000981	RNA polymerase II transcription factor a...	80	9	20.9	0.91697
GO:0016757	transferase activity, transferring glyco...	146	29	38.13	0.9172
GO:0003707	steroid hormone receptor activity	17	5	4.44	0.91776
GO:0016538	cyclin-dependent protein serine/threonin...	13	0	3.4	0.92142
GO:0016814	hydrolase activity, acting on carbon-nit...	12	3	3.13	0.92312
GO:0140102	catalytic activity, acting on a rRNA	10	1	2.61	0.92637
GO:0048037	cofactor binding	187	42	48.84	0.92888
GO:0051213	dioxygenase activity	22	8	5.75	0.93115
GO:0003676	nucleic acid binding	1847	387	482.42	0.93213
GO:0048018	receptor ligand activity	45	13	11.75	0.93281
GO:0016614	oxidoreductase activity, acting on CH-OH...	70	13	18.28	0.93316
GO:0008527	taste receptor activity	7	2	1.83	0.93375
GO:0034593	phosphatidylinositol bisphosphate phosph...	7	0	1.83	0.93526
GO:0140103	catalytic activity, acting on a glycopro...	6	1	1.57	0.93903
GO:0003677	DNA binding	623	105	162.72	0.9394
GO:0016634	oxidoreductase activity, acting on the C...	6	1	1.57	0.94278
GO:0004867	serine-type endopeptidase inhibitor acti...	32	6	8.36	0.94352
GO:0005179	hormone activity	28	9	7.31	0.94378
GO:0004386	helicase activity	106	23	27.69	0.94511
GO:0044212	transcription regulatory region DNA bind...	11	3	2.87	0.94816
GO:0016410	N-acyltransferase activity	37	7	9.66	0.95061
GO:0016830	carbon-carbon lyase activity	30	9	7.84	0.95194
GO:0003916	DNA topoisomerase activity	5	0	1.31	0.95317
GO:0052689	carboxylic ester hydrolase activity	94	17	24.55	0.95516
GO:0016877	ligase activity, forming carbon-sulfur b...	13	4	3.4	0.95732
GO:0032559	adenyl ribonucleotide binding	788	226	205.82	0.95739
GO:0016857	racemase and epimerase activity, acting ...	6	0	1.57	0.95766
GO:0008146	sulfotransferase activity	23	5	6.01	0.95875
GO:0004713	protein tyrosine kinase activity	31	11	8.1	0.9596
GO:0019887	protein kinase regulator activity	19	1	4.96	0.96107
GO:1901981	phosphatidylinositol phosphate binding	7	0	1.83	0.96259
GO:0016616	oxidoreductase activity, acting on the C...	45	11	11.75	0.96283
GO:0004559	alpha-mannosidase activity	10	2	2.61	0.96576
GO:0016859	cis-trans isomerase activity	29	1	7.57	0.9658
GO:0015020	glucuronosyltransferase activity	24	2	6.27	0.97237
GO:0022891	substrate-specific transmembrane transpo...	322	116	84.1	0.9749
GO:0004540	ribonuclease activity	33	7	8.62	0.97754
GO:0030215	semaphorin receptor binding	5	0	1.31	0.97912
GO:0015276	ligand-gated ion channel activity	62	28	16.19	0.98085
GO:0016894	endonuclease activity, active with eithe...	6	1	1.57	0.98088
GO:0004812	aminoacyl-tRNA ligase activity	44	8	11.49	0.98157
GO:0000175	3'-5'-exoribonuclease activity	8	0	2.09	0.98228
GO:0016805	dipeptidase activity	9	6	2.35	0.9837
GO:0042054	histone methyltransferase activity	13	2	3.4	0.98434
GO:0008270	zinc ion binding	730	159	190.67	0.98464
GO:0019001	guanyl nucleotide binding	183	54	47.8	0.98659
GO:0046983	protein dimerization activity	126	23	32.91	0.98739
GO:0072509	divalent inorganic cation transmembrane ...	28	11	7.31	0.9884
GO:0005549	odorant binding	100	22	26.12	0.98852
GO:0051287	NAD binding	38	5	9.93	0.98946
GO:0004549	tRNA-specific ribonuclease activity	9	2	2.35	0.99038
GO:0046906	tetrapyrrole binding	184	58	48.06	0.99086
GO:0016818	hydrolase activity, acting on acid anhyd...	465	142	121.45	0.99195
GO:0004984	olfactory receptor activity	29	3	7.57	0.99197
GO:0004520	endodeoxyribonuclease activity	11	4	2.87	0.99449
GO:0043565	sequence-specific DNA binding	176	26	45.97	0.99665
GO:0008061	chitin binding	103	24	26.9	0.99875
GO:0008417	fucosyltransferase activity	6	1	1.57	0.99896
GO:0016274	protein-arginine N-methyltransferase act...	12	1	3.13	0.99898
GO:0003684	damaged DNA binding	15	1	3.92	0.99921
GO:0004252	serine-type endopeptidase activity	317	48	82.8	0.99935
GO:0017056	structural constituent of nuclear pore	12	1	3.13	0.99942
GO:0003700	DNA binding transcription factor activit...	257	39	67.13	0.99968
GO:0043167	ion binding	2840	759	741.78	1
GO:0016721	oxidoreductase activity, acting on super...	8	3	2.09	1
GO:0016722	oxidoreductase activity, oxidizing metal...	8	3	2.09	1
GO:0098960	postsynaptic neurotransmitter receptor a...	10	5	2.61	1
GO:0015077	monovalent inorganic cation transmembran...	134	47	35	1
GO:0016724	oxidoreductase activity, oxidizing metal...	8	3	2.09	1
GO:0032182	ubiquitin-like protein binding	6	1	1.57	1
GO:0038024	cargo receptor activity	7	2	1.83	1
GO:0015197	peptide transporter activity	16	7	4.18	1
GO:0016160	amylase activity	7	1	1.83	1
GO:1901265	nucleoside phosphate binding	1121	310	292.79	1
GO:0019207	kinase regulator activity	19	1	4.96	1
GO:0017171	serine hydrolase activity	338	52	88.28	1
GO:0061135	endopeptidase regulator activity	46	6	12.01	1
GO:0043177	organic acid binding	10	3	2.61	1
GO:0140110	transcription regulator activity	304	50	79.4	1
GO:0070279	vitamin B6 binding	39	11	10.19	1
GO:0061659	ubiquitin-like protein ligase activity	26	4	6.79	1
GO:0022890	inorganic cation transmembrane transport...	182	65	47.54	1
GO:0008238	exopeptidase activity	99	34	25.86	1
GO:0005253	anion channel activity	10	4	2.61	1
GO:0022892	substrate-specific transporter activity	359	127	93.77	1
GO:0044389	ubiquitin-like protein ligase binding	7	1	1.83	1
GO:0015399	primary active transmembrane transporter...	70	20	18.28	1
GO:0004532	exoribonuclease activity	9	0	2.35	1
GO:0015002	heme-copper terminal oxidase activity	10	2	2.61	1
GO:0015116	sulfate transmembrane transporter activi...	10	3	2.61	1
GO:0016655	oxidoreductase activity, acting on NAD(P...	13	1	3.4	1
GO:0022884	macromolecule transmembrane transporter ...	5	1	1.31	1
GO:0001067	regulatory region nucleic acid binding	11	3	2.87	1
GO:0019787	ubiquitin-like protein transferase activ...	69	12	18.02	1
GO:0019199	transmembrane receptor protein kinase ac...	15	4	3.92	1
GO:0016893	endonuclease activity, active with eithe...	21	9	5.48	1
GO:0005231	excitatory extracellular ligand-gated io...	10	5	2.61	1
GO:0016684	oxidoreductase activity, acting on perox...	24	11	6.27	1
GO:0030594	neurotransmitter receptor activity	32	16	8.36	1
GO:0060589	nucleoside-triphosphatase regulator acti...	55	15	14.37	1
GO:0016675	oxidoreductase activity, acting on a hem...	10	2	2.61	1
GO:0016676	oxidoreductase activity, acting on a hem...	10	2	2.61	1
GO:0022824	transmitter-gated ion channel activity	30	15	7.84	1
GO:0015370	solute:sodium symporter activity	19	10	4.96	1
GO:0008066	glutamate receptor activity	20	10	5.22	1
GO:0032296	double-stranded RNA-specific ribonucleas...	5	2	1.31	1
GO:0042625	ATPase coupled ion transmembrane transpo...	19	8	4.96	1
GO:0004175	endopeptidase activity	431	78	112.57	1
GO:0004697	protein kinase C activity	5	0	1.31	1
GO:1901567	fatty acid derivative binding	5	1	1.31	1
GO:0016866	intramolecular transferase activity	15	4	3.92	1
GO:0022843	voltage-gated cation channel activity	24	13	6.27	1
GO:0000295	adenine nucleotide transmembrane transpo...	19	6	4.96	1
GO:0004112	cyclic-nucleotide phosphodiesterase acti...	11	5	2.87	1
GO:0001012	RNA polymerase II regulatory region DNA ...	6	1	1.57	1
GO:0022832	voltage-gated channel activity	36	17	9.4	1
GO:0022834	ligand-gated channel activity	62	28	16.19	1
GO:0022835	transmitter-gated channel activity	30	15	7.84	1
GO:0099600	transmembrane receptor activity	253	83	66.08	1
GO:0022838	substrate-specific channel activity	167	64	43.62	1
GO:0016297	acyl-[acyl-carrier-protein] hydrolase ac...	5	1	1.31	1
GO:0042887	amide transmembrane transporter activity	5	1	1.31	1
GO:0034212	peptide N-acetyltransferase activity	11	2	2.87	1
GO:0016820	hydrolase activity, acting on acid anhyd...	69	20	18.02	1
GO:0015298	solute:cation antiporter activity	8	4	2.09	1
GO:0022803	passive transmembrane transporter activi...	175	68	45.71	1
GO:0031267	small GTPase binding	45	15	11.75	1
GO:0098531	transcription factor activity, direct li...	7	2	1.83	1
GO:0019707	protein-cysteine S-acyltransferase activ...	10	3	2.61	1
GO:0016817	hydrolase activity, acting on acid anhyd...	465	142	121.45	1
GO:0008509	anion transmembrane transporter activity	46	16	12.01	1
GO:0005057	signal transducer activity, downstream o...	8	2	2.09	1
GO:0070011	peptidase activity, acting on L-amino ac...	615	142	160.63	1
GO:0009931	calcium-dependent protein serine/threoni...	5	0	1.31	1
GO:0015605	organophosphate ester transmembrane tran...	19	6	4.96	1
GO:0003674	molecular_function	8580	2241	2241	1
GO:0016273	arginine N-methyltransferase activity	12	1	3.13	1
GO:0016278	lysine N-methyltransferase activity	16	5	4.18	1
GO:0000975	regulatory region DNA binding	11	3	2.87	1
GO:0070035	purine NTP-dependent helicase activity	18	6	4.7	1
GO:0050136	NADH dehydrogenase (quinone) activity	13	1	3.4	1
GO:0001653	peptide receptor activity	27	4	7.05	1
GO:0004871	signal transducer activity	272	89	71.04	1
GO:0004872	receptor activity	285	92	74.44	1
GO:0035639	purine ribonucleoside triphosphate bindi...	957	276	249.96	1
GO:0097747	RNA polymerase activity	32	7	8.36	1
GO:1904680	peptide transmembrane transporter activi...	5	1	1.31	1
GO:0070001	aspartic-type peptidase activity	12	1	3.13	1
GO:0070003	threonine-type peptidase activity	15	5	3.92	1
GO:0015215	nucleotide transmembrane transporter act...	19	6	4.96	1
GO:0015216	purine nucleotide transmembrane transpor...	19	6	4.96	1
GO:0015923	mannosidase activity	10	2	2.61	1
GO:0033558	protein deacetylase activity	5	0	1.31	1
GO:0015924	mannosyl-oligosaccharide mannosidase act...	5	1	1.31	1
GO:0034062	5'-3' RNA polymerase activity	32	7	8.36	1
GO:0051540	metal cluster binding	55	14	14.37	1
GO:1904315	transmitter-gated ion channel activity i...	10	5	2.61	1
GO:0032550	purine ribonucleoside binding	179	54	46.75	1
GO:0032553	ribonucleotide binding	969	278	253.09	1
GO:0032555	purine ribonucleotide binding	961	276	251	1
GO:0051020	GTPase binding	87	25	22.72	1
GO:0001883	purine nucleoside binding	179	54	46.75	1
GO:0016903	oxidoreductase activity, acting on the a...	47	13	12.28	1
GO:0010857	calcium-dependent protein kinase activit...	5	0	1.31	1
GO:0061783	peptidoglycan muralytic activity	12	3	3.13	1
GO:0099529	neurotransmitter receptor activity invol...	10	5	2.61	1
GO:0044769	ATPase activity, coupled to transmembran...	14	6	3.66	1
GO:1901682	sulfur compound transmembrane transporte...	10	3	2.61	1
GO:0005326	neurotransmitter transporter activity	19	10	4.96	1
GO:0017076	purine nucleotide binding	964	276	251.79	1
GO:0016769	transferase activity, transferring nitro...	14	2	3.66	1
GO:0036442	hydrogen-exporting ATPase activity	8	6	2.09	1
GO:0005346	purine ribonucleotide transmembrane tran...	19	6	4.96	1
GO:1990939	ATP-dependent microtubule motor activity	12	7	3.13	1

## Sheet: GO Enrichment CC
GO.ID	Term	Annotated	Significant	Expected	weight01KS
GO:0005840	ribosome	165	123	44.02	1.9e-27
GO:0015935	small ribosomal subunit	19	16	5.07	5.1e-07
GO:0015934	large ribosomal subunit	17	14	4.53	7e-07
GO:0033180	proton-transporting V-type ATPase, V1 do...	9	9	2.4	3.9e-05
GO:0005874	microtubule	81	35	21.61	6.7e-05
GO:0030054	cell junction	61	23	16.27	0.00067
GO:0022626	cytosolic ribosome	7	6	1.87	0.00231
GO:0045202	synapse	38	17	10.14	0.00275
GO:0016021	integral component of membrane	2320	642	618.88	0.00476
GO:0000502	proteasome complex	33	15	8.8	0.00814
GO:0045211	postsynaptic membrane	19	10	5.07	0.01727
GO:0005737	cytoplasm	1540	490	410.81	0.01832
GO:0005761	mitochondrial ribosome	14	8	3.73	0.02436
GO:0030286	dynein complex	25	11	6.67	0.02889
GO:0033179	proton-transporting V-type ATPase, V0 do...	8	5	2.13	0.02905
GO:0016471	vacuolar proton-transporting V-type ATPa...	6	3	1.6	0.03195
GO:0016282	eukaryotic 43S preinitiation complex	13	7	3.47	0.03355
GO:0033290	eukaryotic 48S preinitiation complex	13	7	3.47	0.03355
GO:0048471	perinuclear region of cytoplasm	12	3	3.2	0.0394
GO:0098800	inner mitochondrial membrane protein com...	33	10	8.8	0.04034
GO:0030120	vesicle coat	16	6	4.27	0.05453
GO:0005838	proteasome regulatory particle	5	3	1.33	0.06212
GO:0005852	eukaryotic translation initiation factor...	16	8	4.27	0.06287
GO:0000776	kinetochore	8	5	2.13	0.06407
GO:0005743	mitochondrial inner membrane	105	33	28.01	0.07357
GO:0005858	axonemal dynein complex	5	3	1.33	0.07514
GO:0000775	chromosome, centromeric region	12	7	3.2	0.08712
GO:0005786	signal recognition particle, endoplasmic...	6	3	1.6	0.08878
GO:0005813	centrosome	9	3	2.4	0.09107
GO:0005891	voltage-gated calcium channel complex	6	4	1.6	0.09372
GO:0034703	cation channel complex	19	10	5.07	0.09839
GO:0019773	proteasome core complex, alpha-subunit c...	7	4	1.87	0.09966
GO:0030139	endocytic vesicle	5	2	1.33	0.10718
GO:0031981	nuclear lumen	247	44	65.89	0.10844
GO:0046540	U4/U6 x U5 tri-snRNP complex	8	2	2.13	0.11824
GO:0005886	plasma membrane	346	100	92.3	0.12605
GO:0012507	ER to Golgi transport vesicle membrane	5	3	1.33	0.12811
GO:0042995	cell projection	73	26	19.47	0.13246
GO:0005669	transcription factor TFIID complex	10	1	2.67	0.13692
GO:0000124	SAGA complex	9	3	2.4	0.13854
GO:0008287	protein serine/threonine phosphatase com...	8	2	2.13	0.14172
GO:0005788	endoplasmic reticulum lumen	16	3	4.27	0.14217
GO:0005739	mitochondrion	296	94	78.96	0.14343
GO:0005759	mitochondrial matrix	36	16	9.6	0.14387
GO:0036452	ESCRT complex	8	1	2.13	0.14438
GO:0008180	COP9 signalosome	8	4	2.13	0.14886
GO:0005930	axoneme	9	5	2.4	0.15061
GO:0044447	axoneme part	7	4	1.87	0.15414
GO:0005938	cell cortex	11	2	2.93	0.16027
GO:0031410	cytoplasmic vesicle	100	23	26.68	0.17513
GO:0031514	motile cilium	9	4	2.4	0.18373
GO:0005912	adherens junction	17	4	4.53	0.18507
GO:0005815	microtubule organizing center	38	11	10.14	0.18918
GO:0019898	extrinsic component of membrane	9	4	2.4	0.20973
GO:0005787	signal peptidase complex	5	1	1.33	0.20978
GO:0030176	integral component of endoplasmic reticu...	21	2	5.6	0.20983
GO:0005885	Arp2/3 protein complex	8	4	2.13	0.21449
GO:0031010	ISWI-type complex	5	2	1.33	0.21482
GO:0030915	Smc5-Smc6 complex	6	1	1.6	0.21987
GO:0033178	proton-transporting two-sector ATPase co...	17	10	4.53	0.22169
GO:0005856	cytoskeleton	248	85	66.16	0.22513
GO:0044456	synapse part	27	11	7.2	0.22673
GO:0030529	intracellular ribonucleoprotein complex	262	148	69.89	0.23164
GO:0005869	dynactin complex	6	3	1.6	0.24409
GO:0032592	integral component of mitochondrial memb...	7	4	1.87	0.24497
GO:0005929	cilium	59	21	15.74	0.24597
GO:0008076	voltage-gated potassium channel complex	9	4	2.4	0.24908
GO:0098798	mitochondrial protein complex	37	12	9.87	0.25367
GO:0044452	nucleolar part	7	2	1.87	0.26015
GO:1990351	transporter complex	33	15	8.8	0.26167
GO:0005768	endosome	60	10	16.01	0.26168
GO:0042383	sarcolemma	6	3	1.6	0.26714
GO:0044444	cytoplasmic part	1036	341	276.36	0.27709
GO:0097525	spliceosomal snRNP complex	15	4	4	0.28459
GO:0044450	microtubule organizing center part	10	3	2.67	0.29533
GO:0070469	respiratory chain	37	6	9.87	0.29776
GO:0005746	mitochondrial respiratory chain	19	4	5.07	0.30189
GO:0099513	polymeric cytoskeletal fiber	85	36	22.67	0.30275
GO:0043226	organelle	2779	700	741.32	0.30355
GO:0005814	centriole	7	3	1.87	0.30549
GO:0010008	endosome membrane	36	7	9.6	0.30967
GO:0008305	integrin complex	5	0	1.33	0.31547
GO:0034464	BBSome	8	2	2.13	0.31894
GO:0005635	nuclear envelope	33	6	8.8	0.32193
GO:0005921	gap junction	6	1	1.6	0.3275
GO:1990391	DNA repair complex	7	3	1.87	0.33155
GO:0031225	anchored component of membrane	23	7	6.14	0.34361
GO:0031970	organelle envelope lumen	15	3	4	0.35001
GO:0034702	ion channel complex	23	12	6.14	0.35307
GO:0098796	membrane protein complex	144	44	38.41	0.35563
GO:0044455	mitochondrial membrane part	50	17	13.34	0.37292
GO:0005623	cell	3555	918	948.33	0.37482
GO:0032991	macromolecular complex	1032	339	275.3	0.38386
GO:0005911	cell-cell junction	10	2	2.67	0.38957
GO:0031305	integral component of mitochondrial inne...	6	3	1.6	0.39637
GO:0042175	nuclear outer membrane-endoplasmic retic...	161	30	42.95	0.39844
GO:0000276	mitochondrial proton-transporting ATP sy...	6	0	1.6	0.4099
GO:0016272	prefoldin complex	8	2	2.13	0.41199
GO:0044441	ciliary part	22	7	5.87	0.41477
GO:0098803	respiratory chain complex	17	3	4.53	0.4252
GO:1990904	ribonucleoprotein complex	271	149	72.29	0.43836
GO:0031301	integral component of organelle membrane	13	7	3.47	0.45369
GO:0005732	small nucleolar ribonucleoprotein comple...	6	3	1.6	0.45407
GO:0044459	plasma membrane part	82	30	21.87	0.4619
GO:0016020	membrane	2770	761	738.92	0.46968
GO:0030126	COPI vesicle coat	5	1	1.33	0.47799
GO:0032993	protein-DNA complex	34	7	9.07	0.48058
GO:0000139	Golgi membrane	85	19	22.67	0.48064
GO:0031012	extracellular matrix	10	3	2.67	0.48094
GO:0055037	recycling endosome	5	1	1.33	0.48241
GO:0030131	clathrin adaptor complex	8	2	2.13	0.48584
GO:0030663	COPI-coated vesicle membrane	6	1	1.6	0.48847
GO:0098533	ATPase dependent transmembrane transport...	7	2	1.87	0.49272
GO:0031982	vesicle	102	24	27.21	0.49315
GO:0005741	mitochondrial outer membrane	21	6	5.6	0.49666
GO:0005770	late endosome	21	3	5.6	0.50176
GO:0000123	histone acetyltransferase complex	27	5	7.2	0.50705
GO:0005774	vacuolar membrane	26	9	6.94	0.51057
GO:0005887	integral component of plasma membrane	36	10	9.6	0.51235
GO:0016459	myosin complex	20	7	5.34	0.51904
GO:0005875	microtubule associated complex	37	17	9.87	0.52025
GO:0034708	methyltransferase complex	13	2	3.47	0.52074
GO:0097458	neuron part	18	2	4.8	0.52286
GO:0043235	receptor complex	6	0	1.6	0.52907
GO:0045263	proton-transporting ATP synthase complex...	11	1	2.93	0.53114
GO:1902562	H4 histone acetyltransferase complex	10	1	2.67	0.53744
GO:0030880	RNA polymerase complex	45	4	12	0.53805
GO:0044424	intracellular part	3179	817	848.03	0.53946
GO:0015630	microtubule cytoskeleton	130	49	34.68	0.54179
GO:0031226	intrinsic component of plasma membrane	38	10	10.14	0.54601
GO:0016528	sarcoplasm	5	0	1.33	0.5495
GO:0030125	clathrin vesicle coat	7	2	1.87	0.56379
GO:0000786	nucleosome	30	5	8	0.56463
GO:0030016	myofibril	7	3	1.87	0.56553
GO:0008250	oligosaccharyltransferase complex	5	1	1.33	0.5666
GO:0048188	Set1C/COMPASS complex	6	2	1.6	0.57025
GO:1902494	catalytic complex	278	61	74.16	0.57144
GO:0034704	calcium channel complex	7	4	1.87	0.57254
GO:0017053	transcriptional repressor complex	7	1	1.87	0.57305
GO:0005819	spindle	18	4	4.8	0.57309
GO:0044445	cytosolic part	15	8	4	0.57802
GO:0005685	U1 snRNP	6	2	1.6	0.58515
GO:0000407	pre-autophagosomal structure	5	1	1.33	0.6002
GO:0005753	mitochondrial proton-transporting ATP sy...	7	0	1.87	0.6049
GO:0098590	plasma membrane region	23	11	6.14	0.61433
GO:0098797	plasma membrane protein complex	22	5	5.87	0.61699
GO:0005769	early endosome	14	2	3.73	0.61712
GO:0043231	intracellular membrane-bounded organelle	2309	492	615.95	0.61886
GO:0000922	spindle pole	8	2	2.13	0.62827
GO:0008023	transcription elongation factor complex	12	3	3.2	0.63746
GO:0031314	extrinsic component of mitochondrial inn...	6	2	1.6	0.64482
GO:0120025	plasma membrane bounded cell projection	64	22	17.07	0.64566
GO:0070161	anchoring junction	18	4	4.8	0.64856
GO:0033588	Elongator holoenzyme complex	5	2	1.33	0.65154
GO:0030117	membrane coat	25	6	6.67	0.65421
GO:0005747	mitochondrial respiratory chain complex ...	12	2	3.2	0.65722
GO:0044448	cell cortex part	9	1	2.4	0.65739
GO:0005758	mitochondrial intermembrane space	14	3	3.73	0.666
GO:0098791	Golgi subcompartment	92	20	24.54	0.68
GO:0005778	peroxisomal membrane	9	3	2.4	0.68002
GO:0005675	holo TFIIH complex	5	1	1.33	0.68075
GO:0016591	DNA-directed RNA polymerase II, holoenzy...	37	3	9.87	0.68611
GO:0030659	cytoplasmic vesicle membrane	30	9	8	0.69488
GO:1902495	transmembrane transporter complex	32	14	8.54	0.70513
GO:0012505	endomembrane system	428	85	114.17	0.71597
GO:0031901	early endosome membrane	7	1	1.87	0.72827
GO:0098588	bounding membrane of organelle	189	48	50.42	0.73006
GO:0005783	endoplasmic reticulum	212	40	56.55	0.73075
GO:0099023	tethering complex	22	3	5.87	0.73341
GO:0030660	Golgi-associated vesicle membrane	15	5	4	0.73499
GO:0044798	nuclear transcription factor complex	26	3	6.94	0.74682
GO:0000145	exocyst	8	1	2.13	0.74731
GO:0016592	mediator complex	25	7	6.67	0.74884
GO:0000813	ESCRT I complex	5	1	1.33	0.75701
GO:0070461	SAGA-type complex	11	4	2.93	0.75849
GO:0098805	whole membrane	110	30	29.34	0.76188
GO:0044439	peroxisomal part	10	3	2.67	0.76234
GO:0070013	intracellular organelle lumen	315	66	84.03	0.76329
GO:0035267	NuA4 histone acetyltransferase complex	7	1	1.87	0.76863
GO:0044440	endosomal part	39	7	10.4	0.77137
GO:0030867	rough endoplasmic reticulum membrane	6	0	1.6	0.77215
GO:0005794	Golgi apparatus	146	31	38.95	0.77311
GO:0000808	origin recognition complex	6	0	1.6	0.77739
GO:0030119	AP-type membrane coat adaptor complex	10	2	2.67	0.78311
GO:0097346	INO80-type complex	11	1	2.93	0.7876
GO:0071944	cell periphery	358	102	95.5	0.79224
GO:1990204	oxidoreductase complex	20	4	5.34	0.79776
GO:0000228	nuclear chromosome	44	7	11.74	0.79809
GO:1902555	endoribonuclease complex	7	0	1.87	0.80166
GO:0044428	nuclear part	366	68	97.63	0.8029
GO:0000932	P-body	8	2	2.13	0.80893
GO:0032040	small-subunit processome	8	1	2.13	0.81157
GO:0030136	clathrin-coated vesicle	11	3	2.93	0.81736
GO:0005791	rough endoplasmic reticulum	10	1	2.67	0.82107
GO:0042575	DNA polymerase complex	6	1	1.6	0.82125
GO:0005681	spliceosomal complex	43	9	11.47	0.82426
GO:0016010	dystrophin-associated glycoprotein compl...	7	1	1.87	0.82688
GO:0000793	condensed chromosome	20	4	5.34	0.82695
GO:0042555	MCM complex	6	0	1.6	0.82914
GO:0044430	cytoskeletal part	168	64	44.82	0.83117
GO:0030658	transport vesicle membrane	15	5	4	0.8317
GO:0032580	Golgi cisterna membrane	7	2	1.87	0.83595
GO:0005694	chromosome	129	22	34.41	0.83628
GO:0000790	nuclear chromatin	31	4	8.27	0.84103
GO:0005730	nucleolus	70	12	18.67	0.84121
GO:0090575	RNA polymerase II transcription factor c...	23	3	6.14	0.8419
GO:0005777	peroxisome	41	9	10.94	0.84199
GO:0061695	transferase complex, transferring phosph...	55	5	14.67	0.84559
GO:0031248	protein acetyltransferase complex	29	5	7.74	0.84665
GO:0000439	core TFIIH complex	5	1	1.33	0.85166
GO:0072546	ER membrane protein complex	5	1	1.33	0.85219
GO:1902554	serine/threonine protein kinase complex	7	1	1.87	0.85577
GO:0044422	organelle part	1142	297	304.64	0.85731
GO:1990234	transferase complex	132	19	35.21	0.85748
GO:0070603	SWI/SNF superfamily-type complex	27	3	7.2	0.86007
GO:0019867	outer membrane	22	6	5.87	0.8604
GO:0000151	ubiquitin ligase complex	24	4	6.4	0.86441
GO:0031461	cullin-RING ubiquitin ligase complex	16	2	4.27	0.8675
GO:0030684	preribosome	14	2	3.73	0.86852
GO:0099503	secretory vesicle	6	2	1.6	0.86854
GO:0017119	Golgi transport complex	6	1	1.6	0.87288
GO:0043232	intracellular non-membrane-bounded organ...	620	243	165.39	0.87875
GO:0015629	actin cytoskeleton	47	18	12.54	0.88058
GO:0005666	DNA-directed RNA polymerase III complex	8	1	2.13	0.88456
GO:0030665	clathrin-coated vesicle membrane	8	2	2.13	0.88499
GO:0005680	anaphase-promoting complex	8	1	2.13	0.8968
GO:0030014	CCR4-NOT complex	9	1	2.4	0.89952
GO:0005667	transcription factor complex	38	5	10.14	0.90218
GO:0098589	membrane region	10	2	2.67	0.91135
GO:0120038	plasma membrane bounded cell projection ...	23	7	6.14	0.91147
GO:0098794	postsynapse	20	10	5.34	0.91156
GO:0016607	nuclear speck	12	1	3.2	0.91443
GO:0005839	proteasome core complex	14	5	3.73	0.92601
GO:0022624	proteasome accessory complex	6	3	1.6	0.92983
GO:0005765	lysosomal membrane	16	4	4.27	0.93014
GO:0043189	H4/H2A histone acetyltransferase complex	8	1	2.13	0.9315
GO:0036464	cytoplasmic ribonucleoprotein granule	11	2	2.93	0.93327
GO:0016604	nuclear body	13	1	3.47	0.93771
GO:0044431	Golgi apparatus part	103	24	27.48	0.93857
GO:0030430	host cell cytoplasm	5	0	1.33	0.95054
GO:0044454	nuclear chromosome part	43	7	11.47	0.95098
GO:0031966	mitochondrial membrane	133	40	35.48	0.95997
GO:0016514	SWI/SNF complex	6	0	1.6	0.96132
GO:0044446	intracellular organelle part	1131	297	301.7	0.96487
GO:0031011	Ino80 complex	9	1	2.4	0.96635
GO:0000178	exosome (RNase complex)	7	1	1.87	0.96802
GO:1902911	protein kinase complex	8	1	2.13	0.96895
GO:1905354	exoribonuclease complex	8	1	2.13	0.96904
GO:0044427	chromosomal part	108	20	28.81	0.97268
GO:0044815	DNA packaging complex	32	5	8.54	0.97339
GO:0098687	chromosomal region	14	7	3.73	0.97372
GO:0044433	cytoplasmic vesicle part	68	15	18.14	0.9743
GO:0005740	mitochondrial envelope	144	40	38.41	0.97444
GO:0005829	cytosol	58	18	15.47	0.97521
GO:0035097	histone methyltransferase complex	10	2	2.67	0.9758
GO:0043234	protein complex	585	161	156.05	0.97638
GO:0005643	nuclear pore	22	5	5.87	0.98197
GO:0005795	Golgi stack	12	2	3.2	0.98706
GO:0031902	late endosome membrane	13	3	3.47	0.98762
GO:0005905	clathrin-coated pit	7	1	1.87	0.98806
GO:0005634	nucleus	1612	315	430.02	0.9884
GO:0005654	nucleoplasm	153	25	40.81	0.99036
GO:0005789	endoplasmic reticulum membrane	160	30	42.68	0.99068
GO:0005615	extracellular space	54	10	14.4	0.99085
GO:0005764	lysosome	32	7	8.54	0.99318
GO:0042025	host cell nucleus	91	18	24.28	0.99344
GO:0032039	integrator complex	8	0	2.13	0.99377
GO:0031090	organelle membrane	334	88	89.1	0.99532
GO:0071565	nBAF complex	5	0	1.33	0.99539
GO:0044451	nucleoplasm part	136	24	36.28	0.99747
GO:0000785	chromatin	62	9	16.54	0.99888
GO:0042765	GPI-anchor transamidase complex	6	0	1.6	0.99936
GO:0098793	presynapse	7	0	1.87	0.99965
GO:0031965	nuclear membrane	15	1	4	0.99967
GO:0005576	extracellular region	355	80	94.7	0.99988
GO:0019866	organelle inner membrane	109	33	29.08	0.99991
GO:0045261	proton-transporting ATP synthase complex...	7	0	1.87	0.99992
GO:0030133	transport vesicle	16	5	4.27	0.99995
GO:0043233	organelle lumen	315	66	84.03	1
GO:0000323	lytic vacuole	32	7	8.54	1
GO:0032806	carboxy-terminal domain protein kinase c...	5	1	1.33	1
GO:0000313	organellar ribosome	14	8	3.73	1
GO:0035770	ribonucleoprotein granule	11	2	2.93	1
GO:0031312	extrinsic component of organelle membran...	6	2	1.6	1
GO:0042579	microbody	41	9	10.94	1
GO:0097708	intracellular vesicle	100	23	26.68	1
GO:0044463	cell projection part	23	7	6.14	1
GO:0044464	cell part	3502	902	934.19	1
GO:0055029	nuclear DNA-directed RNA polymerase comp...	44	4	11.74	1
GO:0030964	NADH dehydrogenase complex	12	2	3.2	1
GO:0098636	protein complex involved in cell adhesio...	5	0	1.33	1
GO:0005773	vacuole	42	12	11.2	1
GO:0034705	potassium channel complex	9	4	2.4	1
GO:0098573	intrinsic component of mitochondrial mem...	7	4	1.87	1
GO:0044391	ribosomal subunit	36	30	9.6	1
GO:0031224	intrinsic component of membrane	2341	648	624.48	1
GO:0031227	intrinsic component of endoplasmic retic...	21	2	5.6	1
GO:0099568	cytoplasmic region	11	2	2.93	1
GO:0031300	intrinsic component of organelle membran...	13	7	3.47	1
GO:0031304	intrinsic component of mitochondrial inn...	6	3	1.6	1
GO:0033643	host cell part	96	18	25.61	1
GO:1903293	phosphatase complex	8	2	2.13	1
GO:0033646	host intracellular part	96	18	25.61	1
GO:0044421	extracellular region part	64	13	17.07	1
GO:0033647	host intracellular organelle	91	18	24.28	1
GO:0097526	spliceosomal tri-snRNP complex	8	2	2.13	1
GO:0033648	host intracellular membrane-bounded orga...	91	18	24.28	1
GO:0044425	membrane part	2477	683	660.76	1
GO:0031967	organelle envelope	177	46	47.22	1
GO:0031968	organelle outer membrane	21	6	5.6	1
GO:0000152	nuclear ubiquitin ligase complex	8	1	2.13	1
GO:0044429	mitochondrial part	178	56	47.48	1
GO:1905368	peptidase complex	47	19	12.54	1
GO:1905369	endopeptidase complex	33	15	8.8	1
GO:0048475	coated membrane	25	6	6.67	1
GO:0097060	synaptic membrane	19	10	5.07	1
GO:0098852	lytic vacuole membrane	16	4	4.27	1
GO:0031984	organelle subcompartment	245	50	65.36	1
GO:0030118	clathrin coat	11	2	2.93	1
GO:0031985	Golgi cisterna	7	2	1.87	1
GO:0016469	proton-transporting two-sector ATPase co...	38	17	10.14	1
GO:0033176	proton-transporting V-type ATPase comple...	19	15	5.07	1
GO:0048500	signal recognition particle	6	3	1.6	1
GO:0033177	proton-transporting two-sector ATPase co...	19	6	5.07	1
GO:0031974	membrane-enclosed lumen	315	66	84.03	1
GO:0044432	endoplasmic reticulum part	174	33	46.42	1
GO:0031975	envelope	177	46	47.22	1
GO:0044437	vacuolar part	26	9	6.94	1
GO:0044438	microbody part	10	3	2.67	1
GO:0005622	intracellular	3179	817	848.03	1
GO:0030532	small nuclear ribonucleoprotein complex	15	4	4	1
GO:0033202	DNA helicase complex	9	1	2.4	1
GO:0030134	COPII-coated ER to Golgi transport vesic...	5	3	1.33	1
GO:0099512	supramolecular fiber	92	39	24.54	1
GO:0030135	coated vesicle	22	7	5.87	1
GO:0030137	COPI-coated vesicle	6	1	1.6	1
GO:0043292	contractile fiber	7	3	1.87	1
GO:0070993	translation preinitiation complex	13	7	3.47	1
GO:0012506	vesicle membrane	30	9	8	1
GO:0098827	endoplasmic reticulum subcompartment	160	30	42.68	1
GO:0099080	supramolecular complex	92	39	24.54	1
GO:0099081	supramolecular polymer	92	39	24.54	1
GO:0097014	ciliary plasm	9	5	2.4	1
GO:1905348	endonuclease complex	7	0	1.87	1
GO:0090665	glycoprotein complex	7	1	1.87	1
GO:0005575	cellular_component	5773	1540	1540	1
GO:0043656	intracellular region of host	96	18	25.61	1
GO:0043657	host cell	96	18	25.61	1
GO:0000428	DNA-directed RNA polymerase complex	44	4	11.74	1
GO:0031903	microbody membrane	9	3	2.4	1
GO:0098802	plasma membrane receptor complex	5	0	1.33	1
GO:1902493	acetyltransferase complex	29	5	7.74	1
GO:0043227	membrane-bounded organelle	2367	506	631.42	1
GO:0043228	non-membrane-bounded organelle	620	243	165.39	1
GO:0045259	proton-transporting ATP synthase complex	18	1	4.8	1
GO:0043229	intracellular organelle	2756	695	735.19	1
GO:0044215	other organism	96	18	25.61	1
GO:0044216	other organism cell	96	18	25.61	1
GO:0044217	other organism part	96	18	25.61	1
GO:0030662	coated vesicle membrane	19	6	5.07	1
GO:0005798	Golgi-associated vesicle	15	5	4	1
GO:0045271	respiratory chain complex I	12	2	3.2	1
GO:0018995	host	96	18	25.61	1
GO:1904949	ATPase complex	34	5	9.07	1
