# Supplementary material for: Eliminating Mosquitoes with Precision Guided Sterile Males
Source: Research Square preprint supplement (doi:10.21203/rs.3.rs-367110/v1), 2021-04-05
Supplement: Supplementary file 7 [file Table S16 - Multigenerational Population Cage data.xlsx]

## Sheet: Sheet1
	Release mature adult pgSIT Males
	Cage ID	Replicate #	Genotypes Crossed		Generation 1										Generation 2										Generation 3										Generation 4										Generation 5
					Laid egg #	Selected egg #	Hatched selected egg #	Hatching rate	Genotype of larvae	Left egg #	Hatched left egg #	Hatching rate of left eggs	Genotype of larvae		Laid egg #	Selected egg #	Hatched selected egg #	Hatching rate	Genotype of larvae	Left egg #	Hatched left egg #	Hatching rate of left eggs	Genotype of larvae		Laid egg #	Selected egg #	Hatched selected egg #	Hatching rate	Genotype of larvae	Left egg #	Hatched left egg #	Hatching rate of left eggs	Genotype of larvae		Laid egg #	Selected egg #	Hatched selected egg #	Hatching rate	Genotype of larvae	Left egg #	Hatched left egg #	Hatching rate of left eggs	Genotype of larvae		Laid egg #	Selected egg #	Hatched selected egg #	Hatching rate	Genotype of larvae
	cage1	Replicate 1	50 WT♂:50 WT♀		4739	100	95	0.95	+/+	4639	4442	0.957534	+/+		5081	100	96	0.96	+/+	4981	4792	0.962056	+/+		5168	100	96	0.96	+/+	5068	4942	0.975138	+/+		4273	100	95	0.95	+/+	4173	4016	0.962377	+/+		4501	100	97	0.97	+/+
	cage2	Replicate 2	50 WT♂:50 WT♀		5060	100	96	0.96	+/+	4960	4773	0.962298	+/+		4967	100	94	0.94	+/+	4867	4613	0.947812	+/+		4381	100	96	0.96	+/+	4281	4173	0.974772	+/+		4469	100	97	0.97	+/+	4369	4228	0.967727	+/+		3994	100	96	0.96	+/+
	cage3	Replicate 3	50 WT♂:50 WT♀		4892	100	98	0.98	+/+	4792	4609	0.961811	+/+		5115	100	94	0.94	+/+	5015	4809	0.958923	+/+		4678	100	97	0.97	+/+	4578	4409	0.963084	+/+		4771	100	94	0.94	+/+	4671	4504	0.964247	+/+		4358	100	95	0.95	+/+
	cage4	Replicate 1	50 gRNA-myo+β-Tub/gRNA-myo+β-Tub♂:50 WT♀		4163	100	82	0.82	gRNA-myo+β-Tub/+	4063	3396	0.835836	gRNA-myo+β-Tub/+		4213	100	84	0.84	gRNA-myo+β-Tub/gRNA-myo+β-Tub; gRNA-myo+β-Tub/+; gRNA-myo/+; gRNA-β-Tub/+; +/+	4113	3440	0.836372	gRNA-myo+β-Tub/gRNA-myo+β-Tub; gRNA-myo+β-Tub/+; gRNA-myo/+; gRNA-β-Tub/+; +/+		4436	100	86	0.86	gRNA-myo+β-Tub/gRNA-myo+β-Tub; gRNA-myo+β-Tub/+; gRNA-myo/+; gRNA-β-Tub/+; +/+	4336	3667	0.84571	gRNA-myo+β-Tub/gRNA-myo+β-Tub; gRNA-myo+β-Tub/+; gRNA-myo/+; gRNA-β-Tub/+; +/+		4035	100	85	0.85	gRNA-myo+β-Tub/gRNA-myo+β-Tub; gRNA-myo+β-Tub/+; gRNA-myo/+; gRNA-β-Tub/+; +/+	3935	3401	0.864295	gRNA-myo+β-Tub/gRNA-myo+β-Tub; gRNA-myo+β-Tub/+; gRNA-myo/+; gRNA-β-Tub/+; +/+		4006	100	87	0.87	gRNA-myo+β-Tub/gRNA-myo+β-Tub; gRNA-myo+β-Tub/+; gRNA-myo/+; gRNA-β-Tub/+; +/+
	cage5	Replicate 2	50 gRNA-myo+β-Tub/gRNA-myo+β-Tub♂:50 WT♀		4559	100	85	0.85	gRNA-myo+β-Tub/+	4459	3758	0.84279	gRNA-myo+β-Tub/+		4366	100	81	0.81	gRNA-myo+β-Tub/gRNA-myo+β-Tub; gRNA-myo+β-Tub/+; gRNA-myo/+; gRNA-β-Tub/+; +/+	4266	3622	0.849039	gRNA-myo+β-Tub/gRNA-myo+β-Tub; gRNA-myo+β-Tub/+; gRNA-myo/+; gRNA-β-Tub/+; +/+		4239	100	84	0.84	gRNA-myo+β-Tub/gRNA-myo+β-Tub; gRNA-myo+β-Tub/+; gRNA-myo/+; gRNA-β-Tub/+; +/+	4139	3459	0.835709	gRNA-myo+β-Tub/gRNA-myo+β-Tub; gRNA-myo+β-Tub/+; gRNA-myo/+; gRNA-β-Tub/+; +/+		3982	100	85	0.85	gRNA-myo+β-Tub/gRNA-myo+β-Tub; gRNA-myo+β-Tub/+; gRNA-myo/+; gRNA-β-Tub/+; +/+	3882	3295	0.848789	gRNA-myo+β-Tub/gRNA-myo+β-Tub; gRNA-myo+β-Tub/+; gRNA-myo/+; gRNA-β-Tub/+; +/+		4127	100	82	0.82	gRNA-myo+β-Tub/gRNA-myo+β-Tub; gRNA-myo+β-Tub/+; gRNA-myo/+; gRNA-β-Tub/+; +/+
	cage6	Replicate 3	50 gRNA-myo+β-Tub/gRNA-myo+β-Tub♂:50 WT♀		4427	100	86	0.86	gRNA-myo+β-Tub/+	4327	3751	0.866882	gRNA-myo+β-Tub/+		4084	100	85	0.85	gRNA-myo+β-Tub/gRNA-myo+β-Tub; gRNA-myo+β-Tub/+; gRNA-myo/+; gRNA-β-Tub/+; +/+	3984	3413	0.856677	gRNA-myo+β-Tub/gRNA-myo+β-Tub; gRNA-myo+β-Tub/+; gRNA-myo/+; gRNA-β-Tub/+; +/+		4306	100	80	0.8	gRNA-myo+β-Tub/gRNA-myo+β-Tub; gRNA-myo+β-Tub/+; gRNA-myo/+; gRNA-β-Tub/+; +/+	4206	3441	0.818117	gRNA-myo+β-Tub/gRNA-myo+β-Tub; gRNA-myo+β-Tub/+; gRNA-myo/+; gRNA-β-Tub/+; +/+		4217	100	84	0.84	gRNA-myo+β-Tub/gRNA-myo+β-Tub; gRNA-myo+β-Tub/+; gRNA-myo/+; gRNA-β-Tub/+; +/+	4117	3562	0.865193	gRNA-myo+β-Tub/gRNA-myo+β-Tub; gRNA-myo+β-Tub/+; gRNA-myo/+; gRNA-β-Tub/+; +/+		3983	100	85	0.85	gRNA-myo+β-Tub/gRNA-myo+β-Tub; gRNA-myo+β-Tub/+; gRNA-myo/+; gRNA-β-Tub/+; +/+
	cage7	Replicate 1	50 Nup-50 cas9/Nup-50 cas9♂:50 WT♀		4276	100	77	0.77	Nup-50 cas9/+	4176	3357	0.803879	Nup-50 cas9/+		4435	100	83	0.83	Nup-50 cas9/Nup-50 cas9; Nup-50 cas9/+; +/+	4335	3669	0.846367	Nup-50 cas9/Nup-50 cas9; Nup-50 cas9/+; +/+		4345	100	85	0.85	Nup-50 cas9/Nup-50 cas9; Nup-50 cas9/+; +/+	4245	3492	0.822615	Nup-50 cas9/Nup-50 cas9; Nup-50 cas9/+; +/+		4506	100	81	0.81	Nup-50 cas9/Nup-50 cas9; Nup-50 cas9/+; +/+	4406	3490	0.792102	Nup-50 cas9/Nup-50 cas9; Nup-50 cas9/+; +/+		4395	100	79	0.79	Nup-50 cas9/Nup-50 cas9; Nup-50 cas9/+; +/+
	cage8	Replicate 2	50 Nup-50 cas9/Nup-50 cas9♂:50 WT♀		4158	100	82	0.82	Nup-50 cas9/+	4058	3329	0.820355	Nup-50 cas9/+		4374	100	80	0.8	Nup-50 cas9/Nup-50 cas9; Nup-50 cas9/+; +/+	4274	3412	0.798315	Nup-50 cas9/Nup-50 cas9; Nup-50 cas9/+; +/+		4607	100	83	0.83	Nup-50 cas9/Nup-50 cas9; Nup-50 cas9/+; +/+	4507	3646	0.808964	Nup-50 cas9/Nup-50 cas9; Nup-50 cas9/+; +/+		4438	100	83	0.83	Nup-50 cas9/Nup-50 cas9; Nup-50 cas9/+; +/+	4338	3566	0.822038	Nup-50 cas9/Nup-50 cas9; Nup-50 cas9/+; +/+		4216	100	82	0.82	Nup-50 cas9/Nup-50 cas9; Nup-50 cas9/+; +/+
	cage9	Replicate 3	50 Nup-50 cas9/Nup-50 cas9♂:50 WT♀		4134	100	85	0.85	Nup-50 cas9/+	4034	3503	0.868369	Nup-50 cas9/+		4178	100	83	0.83	Nup-50 cas9/Nup-50 cas9; Nup-50 cas9/+; +/+	4078	3372	0.826876	Nup-50 cas9/Nup-50 cas9; Nup-50 cas9/+; +/+		3993	100	79	0.79	Nup-50 cas9/Nup-50 cas9; Nup-50 cas9/+; +/+	3893	3218	0.826612	Nup-50 cas9/Nup-50 cas9; Nup-50 cas9/+; +/+		4152	100	85	0.85	Nup-50 cas9/Nup-50 cas9; Nup-50 cas9/+; +/+	4052	3483	0.859576	Nup-50 cas9/Nup-50 cas9; Nup-50 cas9/+; +/+		4293	100	80	0.8	Nup-50 cas9/Nup-50 cas9; Nup-50 cas9/+; +/+
	cage10	Replicate 1	50 pgSIT♂ :50 WT♂:50 WT♀		4535	100	92	0.92	+/+	4435	4032	0.909132	+/+		4650	100	95	0.95	+/+	4550	4297	0.944396	+/+		4782	100	90	0.9	+/+	4682	4296	0.917557	+/+		4559	100	87	0.87	+/+	4459	3895	0.873514	+/+		4389	100	92	0.92	+/+
	cage11	Replicate 2	50 pgSIT♂ :50 WT♂:50 WT♀		4493	100	86	0.86	+/+	4393	3794	0.863647	+/+		4086	100	91	0.91	+/+	3986	3548	0.890115	+/+		4025	100	85	0.85	+/+	3925	3289	0.837962	+/+		4512	100	89	0.89	+/+	4412	4006	0.907978	+/+		4760	100	95	0.95	+/+
	cage12	Replicate 3	50 pgSIT♂ :50 WT♂:50 WT♀		4991	100	97	0.97	+/+	4891	4754	0.971989	+/+		5136	100	96	0.96	+/+	5036	4851	0.963264	+/+		4688	100	93	0.93	+/+	4588	4335	0.944856	+/+		4276	100	94	0.94	+/+	4176	3849	0.921695	+/+		4588	100	93	0.93	+/+
	cage13	Replicate 1	250 pgSIT♂ :50 WT♂:50 WT♀		4015	100	91	0.91	+/+	3915	3643	0.930524	+/+		4446	100	93	0.93	+/+	4346	3991	0.918316	+/+		4389	100	89	0.89	+/+	4289	3745	0.873164	+/+		4172	100	92	0.92	+/+	4072	3766	0.924853	+/+		4096	100	82	0.82	+/+
	cage14	Replicate 2	250 pgSIT♂ :50 WT♂:50 WT♀		4762	100	89	0.89	+/+	4662	4087	0.876662	+/+		4279	100	84	0.84	+/+	4179	3515	0.84111	+/+		4094	100	76	0.76	+/+	3994	3091	0.773911	+/+		3237	100	88	0.88	+/+	3137	2753	0.87759	+/+		3014	100	73	0.73	+/+
	cage15	Replicate 3	250 pgSIT♂ :50 WT♂:50 WT♀		4548	100	77	0.77	+/+	4448	3384	0.760791	+/+		3732	100	82	0.82	+/+	3632	3016	0.830396	+/+		4023	100	70	0.7	+/+	3923	2858	0.728524	+/+		3075	100	65	0.65	+/+	2975	1974	0.663529	+/+		2783	100	55	0.55	+/+
	cage16	Replicate 1	500 pgSIT♂ :50 WT♂:50 WT♀		4382	100	46	0.46	+/+	4282	1917	0.447688	+/+		2125	100	25	0.25	+/+	2025	531	0.262222	+/+		951	100	3	0.03	+/+	851	43	0.0505288	+/+		0	0	0	0	-	0	0	0	-		-	-	-	-	-
	cage17	Replicate 2	500 pgSIT♂ :50 WT♂:50 WT♀		4590	100	71	0.71	+/+	4490	3158	0.703341	+/+		3379	100	57	0.57	+/+	3279	1822	0.555657	+/+		2240	100	27	0.27	+/+	2140	502	0.234579	+/+		1483	100	8	0.08	+/+	1383	128	0.0925524	+/+		392	100	0	0	-
	cage18	Replicate 3	500 pgSIT♂ :50 WT♂:50 WT♀		4215	100	84	0.84	+/+	4115	3461	0.841069	+/+		4438	100	82	0.82	+/+	4338	3474	0.80083	+/+		2618	100	45	0.45	+/+	2518	1185	0.470612	+/+		2064	100	36	0.36	+/+	1964	727	0.370163	+/+		1397	100	18	0.18	+/+
	cage19	Replicate 1	1000 pgSIT♂ :50 WT♂:50 WT♀		4872	100	42	0.42	+/+	4772	1935	0.40549	+/+		2316	100	0	0	-	2216	0	0	-		-	-	-	-	-	-	-	-	-		-	-	-	-	-	-	-	-	-		-	-	-	-	-
	cage20	Replicate 2	1000 pgSIT♂ :50 WT♂:50 WT♀		4618	100	67	0.67	+/+	4518	3088	0.683488	+/+		2842	100	12	0.12	+/+	2742	397	0.144785	+/+		406	100	0	0	-	306	0	0	-		-	-	-	-	-	-	-	-	-		-	-	-	-	-
	cage21	Replicate 3	1000 pgSIT♂ :50 WT♂:50 WT♀		4413	100	27	0.27	+/+	4313	1283	0.297473	+/+		1277	100	0	0	-	1177	0	0	-		-	-	-	-	-	-	-	-	-		-	-	-	-	-	-	-	-	-		-	-	-	-	-
	cage22	Replicate 1	2000 pgSIT♂ :50 WT♂:50 WT♀		4418	100	0	0	-	4318	0	0	-		-	-	-	-	-	-	-	-	-		-	-	-	-	-	-	-	-	-		-	-	-	-	-	-	-	-	-		-	-	-	-	-
	cage23	Replicate 2	2000 pgSIT♂ :50 WT♂:50 WT♀		4327	100	17	0.17	+/+	4227	795	0.188077	+/+		684	100	0	0	-	584	0	0	-		-	-	-	-	-	-	-	-	-		-	-	-	-	-	-	-	-	-		-	-	-	-	-
	cage24	Replicate 3	2000 pgSIT♂ :50 WT♂:50 WT♀		4665	100	44	0.44	+/+	4565	2066	0.452574	+/+		2096	100	0	0	-	1996	0	0	-		-	-	-	-	-	-	-	-	-		-	-	-	-	-	-	-	-	-		-	-	-	-	-
	Release of pgSIT Eggs
	Cage ID	Replicate #	Genotypes Crossed		Generation 1										Generation 2										Generation 3										Generation 4										Generation 5
					Laid egg #	Selected egg #	Hatched selected egg #	Hatching rate	Genotype of larvae	Left egg #	Hatched left egg #	Hatching rate of left eggs	Genotype of larvae		Laid egg #	Selected egg #	Hatched selected egg #	Hatching rate	Genotype of larvae	Left egg #	Hatched left egg #	Hatching rate of left eggs	Genotype of larvae		Laid egg #	Selected egg #	Hatched selected egg #	Hatching rate	Genotype of larvae	Left egg #	Hatched left egg #	Hatching rate of left eggs	Genotype of larvae		Laid egg #	Selected egg #	Hatched selected egg #	Hatching rate	Genotype of larvae	Left egg #	Hatched left egg #	Hatching rate of left eggs	Genotype of larvae		Laid egg #	Selected egg #	Hatched selected egg #	Hatching rate	Genotype of larvae
	cage25	Replicate 1	100 WT : 100 WT		9374	100	97	0.97	+/+	9274	8942	0.964201	+/+		9527	100	96	0.96	+/+	9427	9118	0.967222	+/+		8858	100	93	0.93	+/+	8758	8403	0.959466	+/+		9554	100	95	0.95	+/+	9454	9127	0.965411	+/+		9802	100	97	0.97	+/+
	cage26	Replicate 2	100 WT : 100 WT		10117	100	96	0.96	+/+	10017	9744	0.972746	+/+		9743	100	97	0.97	+/+	9643	9351	0.969719	+/+		9481	100	96	0.96	+/+	9381	9116	0.971751	+/+		9762	100	95	0.95	+/+	9662	9102	0.942041	+/+		10057	100	93	0.93	+/+
	cage27	Replicate 3	100 WT : 100 WT		9835	100	96	0.96	+/+	9735	9426	0.968259	+/+		9491	100	94	0.94	+/+	9391	8947	0.952721	+/+		9570	100	95	0.95	+/+	9470	9036	0.954171	+/+		9588	100	97	0.97	+/+	9488	9215	0.971227	+/+		9329	100	96	0.96	+/+
	cage28	Replicate 1	100 gRNA-myo+β-Tub/gRNA-myo+β-Tub :100 WT		8247	100	84	0.84	gRNA-myo+β-Tub/gRNA-myo+β-Tub; gRNA-myo+β-Tub/+; +/+	8147	6850	0.8408	gRNA-myo+β-Tub/gRNA-myo+β-Tub; gRNA-myo+β-Tub/+; +/+		8396	100	85	0.85	gRNA-myo+β-Tub/gRNA-myo+β-Tub; gRNA-myo+β-Tub/+; gRNA-myo/+; gRNA-β-Tub/+; +/+	8296	6984	0.841851	gRNA-myo+β-Tub/gRNA-myo+β-Tub; gRNA-myo+β-Tub/+; gRNA-myo/+; gRNA-β-Tub/+; +/+		8712	100	87	0.87	gRNA-myo+β-Tub/gRNA-myo+β-Tub; gRNA-myo+β-Tub/+; gRNA-myo/+; gRNA-β-Tub/+; +/+	8612	7428	0.862517	gRNA-myo+β-Tub/gRNA-myo+β-Tub; gRNA-myo+β-Tub/+; gRNA-myo/+; gRNA-β-Tub/+; +/+		7915	100	83	0.83	gRNA-myo+β-Tub/gRNA-myo+β-Tub; gRNA-myo+β-Tub/+; gRNA-myo/+; gRNA-β-Tub/+; +/+	7815	6036	0.772361	gRNA-myo+β-Tub/gRNA-myo+β-Tub; gRNA-myo+β-Tub/+; gRNA-myo/+; gRNA-β-Tub/+; +/+		7985	100	81	0.81	gRNA-myo+β-Tub/gRNA-myo+β-Tub; gRNA-myo+β-Tub/+; gRNA-myo/+; gRNA-β-Tub/+; +/+
	cage29	Replicate 2	100 gRNA-myo+β-Tub/gRNA-myo+β-Tub :100 WT		8693	100	82	0.82	gRNA-myo+β-Tub/gRNA-myo+β-Tub; gRNA-myo+β-Tub/+; +/+	8593	7135	0.830327	gRNA-myo+β-Tub/gRNA-myo+β-Tub; gRNA-myo+β-Tub/+; +/+		8419	100	84	0.84	gRNA-myo+β-Tub/gRNA-myo+β-Tub; gRNA-myo+β-Tub/+; gRNA-myo/+; gRNA-β-Tub/+; +/+	8319	7032	0.845294	gRNA-myo+β-Tub/gRNA-myo+β-Tub; gRNA-myo+β-Tub/+; gRNA-myo/+; gRNA-β-Tub/+; +/+		8025	100	84	0.84	gRNA-myo+β-Tub/gRNA-myo+β-Tub; gRNA-myo+β-Tub/+; gRNA-myo/+; gRNA-β-Tub/+; +/+	7925	7024	0.886309	gRNA-myo+β-Tub/gRNA-myo+β-Tub; gRNA-myo+β-Tub/+; gRNA-myo/+; gRNA-β-Tub/+; +/+		8329	100	81	0.81	gRNA-myo+β-Tub/gRNA-myo+β-Tub; gRNA-myo+β-Tub/+; gRNA-myo/+; gRNA-β-Tub/+; +/+	8229	6829	0.82987	gRNA-myo+β-Tub/gRNA-myo+β-Tub; gRNA-myo+β-Tub/+; gRNA-myo/+; gRNA-β-Tub/+; +/+		7649	100	83	0.83	gRNA-myo+β-Tub/gRNA-myo+β-Tub; gRNA-myo+β-Tub/+; gRNA-myo/+; gRNA-β-Tub/+; +/+
	cage30	Replicate 3	100 gRNA-myo+β-Tub/gRNA-myo+β-Tub :100 WT		8748	100	85	0.85	gRNA-myo+β-Tub/gRNA-myo+β-Tub; gRNA-myo+β-Tub/+; +/+	8648	7428	0.858927	gRNA-myo+β-Tub/gRNA-myo+β-Tub; gRNA-myo+β-Tub/+; +/+		7752	100	81	0.81	gRNA-myo+β-Tub/gRNA-myo+β-Tub; gRNA-myo+β-Tub/+; gRNA-myo/+; gRNA-β-Tub/+; +/+	7652	6135	0.801751	gRNA-myo+β-Tub/gRNA-myo+β-Tub; gRNA-myo+β-Tub/+; gRNA-myo/+; gRNA-β-Tub/+; +/+		8473	100	85	0.85	gRNA-myo+β-Tub/gRNA-myo+β-Tub; gRNA-myo+β-Tub/+; gRNA-myo/+; gRNA-β-Tub/+; +/+	8373	7133	0.851905	gRNA-myo+β-Tub/gRNA-myo+β-Tub; gRNA-myo+β-Tub/+; gRNA-myo/+; gRNA-β-Tub/+; +/+		8311	100	83	0.83	gRNA-myo+β-Tub/gRNA-myo+β-Tub; gRNA-myo+β-Tub/+; gRNA-myo/+; gRNA-β-Tub/+; +/+	8211	6750	0.822068	gRNA-myo+β-Tub/gRNA-myo+β-Tub; gRNA-myo+β-Tub/+; gRNA-myo/+; gRNA-β-Tub/+; +/+		8093	100	82	0.82	gRNA-myo+β-Tub/gRNA-myo+β-Tub; gRNA-myo+β-Tub/+; gRNA-myo/+; gRNA-β-Tub/+; +/+
	cage31	Replicate 1	100 Nup-50 cas9/Nup-50 cas9 : 100 WT		8174	100	79	0.79	Nup-50 cas9/Nup-50 cas9; Nup-50 cas9/+; +/+	8074	6529	0.808645	Nup-50 cas9/Nup-50 cas9; Nup-50 cas9/+; +/+		8114	100	83	0.83	Nup-50 cas9/Nup-50 cas9; Nup-50 cas9/+; +/+	8014	6722	0.838782	Nup-50 cas9/Nup-50 cas9; Nup-50 cas9/+; +/+		8357	100	82	0.82	Nup-50 cas9/Nup-50 cas9; Nup-50 cas9/+; +/+	8257	6927	0.838925	Nup-50 cas9/Nup-50 cas9; Nup-50 cas9/+; +/+		8013	100	80	0.8	Nup-50 cas9/Nup-50 cas9; Nup-50 cas9/+; +/+	7913	6214	0.78529	Nup-50 cas9/Nup-50 cas9; Nup-50 cas9/+; +/+		7614	100	83	0.83	Nup-50 cas9/Nup-50 cas9; Nup-50 cas9/+; +/+
	cage32	Replicate 2	100 Nup-50 cas9/Nup-50 cas9 : 100 WT		7355	100	85	0.85	Nup-50 cas9/Nup-50 cas9; Nup-50 cas9/+; +/+	7255	6012	0.82867	Nup-50 cas9/Nup-50 cas9; Nup-50 cas9/+; +/+		7938	100	81	0.81	Nup-50 cas9/Nup-50 cas9; Nup-50 cas9/+; +/+	7838	6498	0.829038	Nup-50 cas9/Nup-50 cas9; Nup-50 cas9/+; +/+		8219	100	84	0.84	Nup-50 cas9/Nup-50 cas9; Nup-50 cas9/+; +/+	8119	6891	0.84875	Nup-50 cas9/Nup-50 cas9; Nup-50 cas9/+; +/+		7136	100	84	0.84	Nup-50 cas9/Nup-50 cas9; Nup-50 cas9/+; +/+	7036	5793	0.823337	Nup-50 cas9/Nup-50 cas9; Nup-50 cas9/+; +/+		7938	100	81	0.81	Nup-50 cas9/Nup-50 cas9; Nup-50 cas9/+; +/+
	cage33	Replicate 3	100 Nup-50 cas9/Nup-50 cas9 : 100 WT		7718	100	82	0.82	Nup-50 cas9/Nup-50 cas9; Nup-50 cas9/+; +/+	7618	6233	0.818194	Nup-50 cas9/Nup-50 cas9; Nup-50 cas9/+; +/+		8326	100	84	0.84	Nup-50 cas9/Nup-50 cas9; Nup-50 cas9/+; +/+	8226	6865	0.834549	Nup-50 cas9/Nup-50 cas9; Nup-50 cas9/+; +/+		8195	100	81	0.81	Nup-50 cas9/Nup-50 cas9; Nup-50 cas9/+; +/+	8095	6684	0.825695	Nup-50 cas9/Nup-50 cas9; Nup-50 cas9/+; +/+		8447	100	84	0.84	Nup-50 cas9/Nup-50 cas9; Nup-50 cas9/+; +/+	8347	7096	0.850126	Nup-50 cas9/Nup-50 cas9; Nup-50 cas9/+; +/+		8356	100	81	0.81	Nup-50 cas9/Nup-50 cas9; Nup-50 cas9/+; +/+
	cage34	Replicate 1	100 gRNA-myo+β-Tub-Nup-50 cas9/+ (maternal cas9) :100 WT		4758	100	95	0.95	+/+	4658	4431	0.951267	+/+		4604	100	96	0.96	+/+	4504	4294	0.953375	+/+		4150	100	97	0.97	+/+	4050	3872	0.956049	+/+		4358	100	94	0.94	+/+	4258	3971	0.932597	+/+		4505	100	95	0.95	+/+
	cage35	Replicate 2	100 gRNA-myo+β-Tub-Nup-50 cas9/+ (maternal cas9) :100 WT		4396	100	95	0.95	+/+	4296	4096	0.953445	+/+		4836	100	94	0.94	+/+	4736	4519	0.954181	+/+		4783	100	95	0.95	+/+	4683	4429	0.945761	+/+		4626	100	93	0.93	+/+	4526	4148	0.916483	+/+		4462	100	92	0.92	+/+
	cage36	Replicate 3	100 gRNA-myo+β-Tub-Nup-50 cas9/+ (maternal cas9) :100 WT		4599	100	96	0.96	+/+	4499	4383	0.974216	+/+		4495	100	93	0.93	+/+	4395	4117	0.936746	+/+		4894	100	93	0.93	+/+	4794	4557	0.950563	+/+		3815	100	97	0.97	+/+	3715	3579	0.963392	+/+		4261	100	96	0.96	+/+
	cage37	Replicate 1	500 gRNA-myo+β-Tub-Nup-50 cas9/+ (maternal cas9) :100 WT		4469	100	97	0.97	+/+	4369	4193	0.959716	+/+		4413	100	84	0.84	+/+	4313	3565	0.826571	+/+		3792	100	85	0.85	+/+	3692	3176	0.860238	+/+		4093	100	94	0.94	+/+	3993	3694	0.925119	+/+		4467	100	89	0.89	+/+
	cage38	Replicate 2	500 gRNA-myo+β-Tub-Nup-50 cas9/+ (maternal cas9) :100 WT		4625	100	95	0.95	+/+	4525	4316	0.953812	+/+		4682	100	97	0.97	+/+	4582	4426	0.965954	+/+		4835	100	94	0.94	+/+	4735	4460	0.941922	+/+		4574	100	97	0.97	+/+	4474	4322	0.966026	+/+		4398	100	95	0.95	+/+
	cage39	Replicate 3	500 gRNA-myo+β-Tub-Nup-50 cas9/+ (maternal cas9) :100 WT		4712	100	95	0.95	+/+	4612	4473	0.969861	+/+		5038	100	95	0.95	+/+	4938	4764	0.964763	+/+		4781	100	86	0.86	+/+	4681	4093	0.874386	+/+		4195	100	89	0.89	+/+	4095	3648	0.890842	+/+		4022	100	91	0.91	+/+
	cage40	Replicate 1	1000 gRNA-myo+β-Tub-Nup-50 cas9/+ (maternal cas9) :100 WT		5013	100	94	0.94	+/+	4913	4566	0.929371	+/+		4368	100	84	0.84	+/+	4268	3769	0.883083	+/+		3972	100	78	0.78	+/+	3872	3013	0.778151	+/+		3680	100	65	0.65	+/+	3580	2249	0.628212	+/+		3159	100	73	0.73	+/+
	cage41	Replicate 2	1000 gRNA-myo+β-Tub-Nup-50 cas9/+ (maternal cas9) :100 WT		4765	100	97	0.97	+/+	4665	4507	0.966131	+/+		4671	100	94	0.94	+/+	4571	4320	0.945089	+/+		4691	100	89	0.89	+/+	4591	3995	0.870181	+/+		4328	100	91	0.91	+/+	4228	3793	0.897114	+/+		4484	100	93	0.93	+/+
	cage42	Replicate 3	1000 gRNA-myo+β-Tub-Nup-50 cas9/+ (maternal cas9) :100 WT		4834	100	69	0.69	+/+	4734	3328	0.703	+/+		3035	100	53	0.53	+/+	2935	1524	0.51925	+/+		2375	100	47	0.47	+/+	2275	1114	0.48967	+/+		2083	100	22	0.22	+/+	1983	459	0.231467	+/+		1126	100	18	0.18	+/+
	cage43	Replicate 1	2000 gRNA-myo+β-Tub-Nup-50 cas9/+ (maternal cas9) :100 WT		4582	100	89	0.89	+/+	4482	3962	0.88398	+/+		4174	100	85	0.85	+/+	4074	3495	0.857879	+/+		3807	100	86	0.86	+/+	3707	3198	0.862692	+/+		3972	100	73	0.73	+/+	3872	2792	0.721074	+/+		3511	100	55	0.55	+/+
	cage44	Replicate 2	2000 gRNA-myo+β-Tub-Nup-50 cas9/+ (maternal cas9) :100 WT		4436	100	77	0.77	+/+	4336	3394	0.782749	+/+		3591	100	53	0.53	+/+	3491	1783	0.510742	+/+		2440	100	35	0.35	+/+	2340	734	0.313675	+/+		1695	100	28	0.28	+/+	1595	462	0.289655	+/+		1292	100	8	0.08	+/+
	cage45	Replicate 3	2000 gRNA-myo+β-Tub-Nup-50 cas9/+ (maternal cas9) :100 WT		4311	100	68	0.68	+/+	4211	2857	0.678461	+/+		3449	100	45	0.45	+/+	3349	1538	0.459242	+/+		2459	100	32	0.32	+/+	2359	795	0.337007	+/+		1338	100	15	0.15	+/+	1238	169	0.136511	+/+		438	100	0	0	-
	cage46	Replicate 1	4000 gRNA-myo+β-Tub-Nup-50 cas9/+ (maternal cas9) :100 WT		4225	100	75	0.75	+/+	4125	3081	0.746909	+/+		3871	100	61	0.61	+/+	3771	2293	0.608062	+/+		2664	100	52	0.52	+/+	2564	1283	0.50039	+/+		2594	100	13	0.13	+/+	2494	268	0.107458	+/+		552	100	0	0	-
	cage47	Replicate 2	4000 gRNA-myo+β-Tub-Nup-50 cas9/+ (maternal cas9) :100 WT		4019	100	81	0.81	+/+	3919	3166	0.807859	+/+		3658	100	70	0.7	+/+	3558	2542	0.714446	+/+		3327	100	41	0.41	+/+	3227	1378	0.427022	+/+		2039	100	25	0.25	+/+	1939	445	0.2295	+/+		1439	100	28	0.28	+/+
	cage48	Replicate 3	4000 gRNA-myo+β-Tub-Nup-50 cas9/+ (maternal cas9) :100 WT		4532	100	62	0.62	+/+	4432	2805	0.632897	+/+		3208	100	44	0.44	+/+	3108	1307	0.420528	+/+		2028	100	30	0.3	+/+	1928	648	0.3361	+/+		1327	100	27	0.27	+/+	1227	349	0.284434	+/+		1027	100	0	0	-
[truncated: 13 more columns]
