# Supplementary material for: Eliminating Mosquitoes with Precision Guided Sterile Males
Source: Research Square preprint supplement (doi:10.21203/rs.3.rs-367110/v1), 2021-04-05
Supplement: Supplementary file 8 [file Table S17. Parameters used in Aedes aegypti population suppression model_.xlsx]

## Sheet: Sheet1
	Parameter:	Value (range):	Reference:
pgSIT:	Sterility of pgSIT males	1	This paper
	Male mating competitiveness of pgSIT males	0.25 (0-0.5)	This paper
	Lifespan reduction of pgSIT males	0.25 (0-0.5)	This paper
	Number of consecutive weekly releases	18 (10-24)	Kandul et al. (2020)
	Number of pgSIT eggs released per wild adult	200 (0-400)	Kandul et al. (2020)
Mosquito life history:	Egg production per female (per day)	20	Otero et al. (2006)
	Duration of egg stage (days)	2	Eisen et al. (2014)
	Duration of larval stage (days)	5	Eisen et al. (2014)
	Duration of pupal stage (days)	1	Eisen et al. (2014)
	Daily population growth rate (per day)	1.175	Simoy et al. (2015)
	Daily mortality risk of adult stage (per day)	0.09	Focks et al. (1993), Horsfall (1955), Fay (1964)
Landscape:	Number of human structures	62	https://www.openstreetmap.org/
	Number of adult mosquitoes (per human structure)	16	Ritchie et al. (2013)
References:
Kandul NP, Liu J, Sánchez HM, Wu SL, Marshall JM, Akbari OS (2019) Transforming insect population control with precision guided sterile males. Nature Communications 10: 84.
Otero M, Solari HG, Schweigmann N (2006) A stochastic population dynamics model for Aedes aegypti: formulation and application to a city with temperate climate. Bull Math Biol 68: 1945–974.
Eisen L, Monaghan AJ, Lozano-Fuentes S, Steinhoff DF, Hayden MH, Bieringer PE (2014) The impact of temperature on the bionomics of Aedes (Stegomyia) aegypti with special reference to the cool geographic range margins. J Med Entomol. 51: 496–516.
Simoy MI, Simoy MV, Canziani GA (2015) The effect of temperature on the population dynamics of Aedes aegypti. Ecological Modelling. 314: 100–110.
Focks DA, Haile DG, Daniels E, Mount GA (1993) Dynamic life table model for Aedes aegypti (Diptera: Culicidae): analysis of the literature and model development. J Med Entomol 30: 1003–1017.
Horsfall WR (1955) Mosquitoes: Their Bionomics and Relation to Disease. Hafner, London.
Fay RW (1964) The biology and bionomics of Aedes aegypti in the laboratory. Mosq News 24: 300–308.
Ritchie SA, Montgomery BL, Hoffmann AA (2013) Novel estimates of Aedes aegypti (Diptera: Culicidae) population size and adult survival based on Wolbachia releases. J Med Entomol 50: 624–631.
