# Supplementary material for: Eliminating Mosquitoes with Precision Guided Sterile Males
Source: Research Square preprint supplement (doi:10.21203/rs.3.rs-367110/v1), 2021-04-05
Supplement: Supplementary file 9 [file Table S18 - Primer and gRNA sequences.xlsx]

## Sheet: gRNA Target sites
	Table S8. Primers, gRNAs, gBlocks used in this study
	Primers used for Plasmid Construction
	Internal Construct ID	Plasmid Description	Primer ID	Primer Sequence (5’ to 3’)	PCR Template	Aplicon
	OA-874PA (Addgene #164846)	Nup50 (AAEL005635)-Cas9-OpIE2-CFP	874-P10	AAAAGGCCGGCGGCCACGAAAAAGGCCGGCCAGGCAAAAAAGAAAAAGTAATTAATTAACTAGAATGAATCGTTT	Addgene plasmid 100608	P10-3'UTR
			777B	GTACTATGTATGGGCCCGCG
	OA-1067A (Intermediate plasmid)	U6b-βTub-gRNA1-U6c-βTub-gRNA2-U6b-βTub-gRNA3-U6c-βTub-gRNA4-3xP3-tdTomato	1067.C1	CAATGGTTAATTCGAGCTC	OA-1055A	U6b-βTub-gRNA1-U6c-βTub-gRNA2
			1067.C2	CGATTATAATAGTTTCGTTTGTGATGAGTTTAAACGCTAGCGAAATCGGTTTTGGTGT
	OA-1067A1 (Addgene #164847)	U6b-βTub-gRNA1-U6c-βTub-gRNA2-U6b-βTub-gRNA3-U6c-βTub-gRNA4-3xP3-eGFP	1067A1.C1	AAAACCGATTTCGGCCTTTTGGGCCCGGCGCGCCGTTCCCACAATGGTTAATTCG	Addgene plasmid #104967	3xP3-eGFP
			1067A1.C2	TGGCTGATTATGATCTAGAGTCG
	OA-1067K (Addgene #164848)	U6b-myo-fem-gRNA1-U6c-myo-fem-gRNA2-3xP3-tdTomato-U6b-myo-fem-gRNA3-U6c-myo-fem-gRNA4	1167.C5	CCAAACTCATCAATGTATCTTAAAGCTTGCTAGCTCATCACAAACGAAACTA	OA-1055X	U6b-myo-fem-gRNA3-U6c-myo-fem-gRNA4
			1167.C6	TGCACTGAACATTGTCAGATCCGAGATCGTTTAAACGAAATCGGTTTTGGTGT
	gRNA Genomic Target Sequences and Complete gRNA sequences
	gRNA ID	Description	gRNA Genomic Target Sequence (5’ to 3’, PAM, NGG)	gRNA Scaffold	Ordered from:
	gRNA-β-Tub 1	β-Tub gRNA Target sequence 1	TACTACAACGAGGCTACCGGAGG	Synthego Modified EZ Scaffold - 80mer - proprietary sequence	In vitro Synthesis from Synthego, CA, USA.
	gRNA-β-Tub 2	β-Tub gRNA Target sequence 2	GTCTCCGCAATACGCCCCGGTGG
	gRNA-β-Tub 3	β-Tub gRNA Target sequence 3	GATAGGAGCCAAGTTCTGGGAGG
	gRNA-β-Tub 4	β-Tub gRNA Target sequence 4	CACTATGGATTCGGTCCGAGCGG
	gRNA-myo-fem 1	myo-fem gRNA Target sequence 1	GAAATGAAGAGCCATTCGGAGGG
	gRNA-myo-fem 2	myo-fem gRNA Target sequence 2	GGTGAAATCAAAGCAACCAAGGG
	gRNA-myo-fem 3	myo-fem gRNA Target sequence 3	GGCTTCATCTGGAACCCAGCAGG
	gRNA-myo-fem 4	myo-fem gRNA Target sequence 4	GTAACCGTTGCCCTACCCGGTGG
	Primers used to Amplify Genomic Sequences of Target Genes (β-Tub and myo-fem)
	Primer ID	Description	Primer Sequence (5’ to 3’)	PCR Template
	β-Tub F	β-Tub Foward Primer	CTGCCGCCACAATGTAAATC	Ae. aegypti Genomic DNA
	β-Tub R	β-Tub Reverse Primer	GTAGGATTCGTCCGTGTTCTC
	myo-fem F	myo-fem Foward Primer	CGACACTAGGGTGCTGTTATC
	myo-fem R	myo-fem Reverse Primer	TCGTCACGTTGGGTGTAATG
	Primers used to Amplify Genomic Sequences of Target Genes (β-Tub and myo-fem) for Amplicon EZ with Illumina adapter
	1067A1-GT-F2	β-Tub F	ACACTCTTTCCCTACACGACGCTCTTCCGATCTGGAACGCGGACGTGATTT	Ae. aegypti Genomic DNA
	1067A1-GT-R2	β-Tub R	GACTGGAGTTCAGACGTGTGCTCTTCCGATCTCCCTTCGGTATAATGTCCCTTG
	1067K-GT-F1	myo-fem F	ACACTCTTTCCCTACACGACGCTCTTCCGATCTGGTAGGCATCTACGAGCAAA
	1067K-GT-R1	myo-fem R	GACTGGAGTTCAGACGTGTGCTCTTCCGATCTGGCTATGTGAGTAACACCTTCT
	gBlock Sequences Used in this Study
	Internal Construct ID	Description	gBlock Sequence (5’ to 3’, gRNA)
	OA-874PA (Addgene #164846)	OpIE2-CFP-SV40	CTTTTGCACGCGGGCCCATACATAGTACAAACTCTACGTTTCGTAGACTATTTTACATAAATAGTCTACACCGTTGTATACGCTCCAAATACACTACCACACATTGAACCTTTTTGCAGTGCAAAAAAGTACGTGTCGGCAGTCACGTAGGCCGGCCTTATCGGGTCGCGTCCTGTCACGTACGAATCACATTATCGGACCGGACGAGTGTTGTCTTATCGTGACAGGACGCCAGCTTCCTGTGTTGCTAACCGCAGCCGGACGCAACTCCTTATCGGAACAGGACGCGCCTCCATATCAGCCGCGCGTTATCTCATGCGCGTGACCGGACACGAGGCGCCCGTCCCGCTTATCGCGCCTATAAATACAGCCCGCAACGATCTGGTAAACACAGTTGAA…
	OA-1055A (Intermediate plasmid)	U6b-βTub-gRNA1	CACAATGGTTAATTCGAGCTCGCCCGGGCTCCTAGGAGATCTTCATCACAAACGAAACTATTATAATCGTCTTCAGGGGAACGGTAGCATCATATCTGTCACCAGTCAGTCGGATTCCTTTCTTTCGGCATAAATTATGCTCGGGTGACGAGACGAGTTGAAAATCCCGTAAATTAAAACATATACCACACTCGCCGTCCTAGACGACGACGACGACGACGATTCCCAAGGAATTGAACCCTTCATTTGCATTTCACTACCGCTCTGAGAGATGCAAAGCGCGCCAGACAGTCGATCGAATCTGCAGACCAGAGAGTCACATCAAGAATGTTGACATTCCACCAGAAGACTCTAATTATTCTTCGCTCGACTGGGAAAACTGTTAACAACTGCTCGAGT…
		U6c-βTub-gRNA2	AGTCGCGATCGCTTAATTAACCGCGGATATGTCTTGCCGAAGCACATTAACCCAAGCCATTTATATATCAAGTACAAGTTGATTTGATTCTAGTGATGGACTGACACGAATCTATGGCACTGTTGCAGAGCTTACAAACAGGTACCCGGAGTCGCTTCAATTATTCAATCATCCATTCAAAAACTTCCATCTCTTCCAATTAGCCAATATTCAAATTGGAATCCAGCCAGCCGACGGAGGCAGATGGTCTACCTGGCAACTATAGAGTTTCCATGTTTCCAGACTTTCCCTCCCGGTAAACGGAGACAAAACGACAGACGTAAGTAGGTACATATGCATACCGCACGGACAAATCAAATTTGTCTGGCAGCTCCAATTAGAGTCGTTAAAAATTTAACG…
	OA-1055B (Intermediate plasmid)	U6b-βTub-gRNA3	CACAATGGTTAATTCGAGCTCGCCCGGGCTCCTAGGAGATCTTCATCACAAACGAAACTATTATAATCGTCTTCAGGGGAACGGTAGCATCATATCTGTCACCAGTCAGTCGGATTCCTTTCTTTCGGCATAAATTATGCTCGGGTGACGAGACGAGTTGAAAATCCCGTAAATTAAAACATATACCACACTCGCCGTCCTAGACGACGACGACGACGACGATTCCCAAGGAATTGAACCCTTCATTTGCATTTCACTACCGCTCTGAGAGATGCAAAGCGCGCCAGACAGTCGATCGAATCTGCAGACCAGAGAGTCACATCAAGAATGTTGACATTCCACCAGAAGACTCTAATTATTCTTCGCTCGACTGGGAAAACTGTTAACAACTGCTCGAGT…
		U6c-βTub-gRNA4	AGTCGCGATCGCTTAATTAACCGCGGATATGTCTTGCCGAAGCACATTAACCCAAGCCATTTATATATCAAGTACAAGTTGATTTGATTCTAGTGATGGACTGACACGAATCTATGGCACTGTTGCAGAGCTTACAAACAGGTACCCGGAGTCGCTTCAATTATTCAATCATCCATTCAAAAACTTCCATCTCTTCCAATTAGCCAATATTCAAATTGGAATCCAGCCAGCCGACGGAGGCAGATGGTCTACCTGGCAACTATAGAGTTTCCATGTTTCCAGACTTTCCCTCCCGGTAAACGGAGACAAAACGACAGACGTAAGTAGGTACATATGCATACCGCACGGACAAATCAAATTTGTCTGGCAGCTCCAATTAGAGTCGTTAAAAATTTAACG…
	OA-1055W (Intermediate plasmid)	U6b-myo-fem-gRNA1	CACAATGGTTAATTCGAGCTCGCCCGGGCTCCTAGGAGATCTTCATCACAAACGAAACTATTATAATCGTCTTCAGGGGAACGGTAGCATCATATCTGTCACCAGTCAGTCGGATTCCTTTCTTTCGGCATAAATTATGCTCGGGTGACGAGACGAGTTGAAAATCCCGTAAATTAAAACATATACCACACTCGCCGTCCTAGACGACGACGACGACGACGATTCCCAAGGAATTGAACCCTTCATTTGCATTTCACTACCGCTCTGAGAGATGCAAAGCGCGCCAGACAGTCGATCGAATCTGCAGACCAGAGAGTCACATCAAGAATGTTGACATTCCACCAGAAGACTCTAATTATTCTTCGCTCGACTGGGAAAACTGTTAACAACTGCTCGAGT…
		U6c-myo-fem-gRNA2	AGTCGCGATCGCTTAATTAACCGCGGATATGTCTTGCCGAAGCACATTAACCCAAGCCATTTATATATCAAGTACAAGTTGATTTGATTCTAGTGATGGACTGACACGAATCTATGGCACTGTTGCAGAGCTTACAAACAGGTACCCGGAGTCGCTTCAATTATTCAATCATCCATTCAAAAACTTCCATCTCTTCCAATTAGCCAATATTCAAATTGGAATCCAGCCAGCCGACGGAGGCAGATGGTCTACCTGGCAACTATAGAGTTTCCATGTTTCCAGACTTTCCCTCCCGGTAAACGGAGACAAAACGACAGACGTAAGTAGGTACATATGCATACCGCACGGACAAATCAAATTTGTCTGGCAGCTCCAATTAGAGTCGTTAAAAATTTAACG…
	OA-1055X (Intermediate plasmid)	U6b-myo-fem-gRNA3	CACAATGGTTAATTCGAGCTCGCCCGGGCTCCTAGGAGATCTTCATCACAAACGAAACTATTATAATCGTCTTCAGGGGAACGGTAGCATCATATCTGTCACCAGTCAGTCGGATTCCTTTCTTTCGGCATAAATTATGCTCGGGTGACGAGACGAGTTGAAAATCCCGTAAATTAAAACATATACCACACTCGCCGTCCTAGACGACGACGACGACGACGATTCCCAAGGAATTGAACCCTTCATTTGCATTTCACTACCGCTCTGAGAGATGCAAAGCGCGCCAGACAGTCGATCGAATCTGCAGACCAGAGAGTCACATCAAGAATGTTGACATTCCACCAGAAGACTCTAATTATTCTTCGCTCGACTGGGAAAACTGTTAACAACTGCTCGAGT…
		U6c-myo-fem-gRNA4	AGTCGCGATCGCTTAATTAACCGCGGATATGTCTTGCCGAAGCACATTAACCCAAGCCATTTATATATCAAGTACAAGTTGATTTGATTCTAGTGATGGACTGACACGAATCTATGGCACTGTTGCAGAGCTTACAAACAGGTACCCGGAGTCGCTTCAATTATTCAATCATCCATTCAAAAACTTCCATCTCTTCCAATTAGCCAATATTCAAATTGGAATCCAGCCAGCCGACGGAGGCAGATGGTCTACCTGGCAACTATAGAGTTTCCATGTTTCCAGACTTTCCCTCCCGGTAAACGGAGACAAAACGACAGACGTAAGTAGGTACATATGCATACCGCACGGACAAATCAAATTTGTCTGGCAGCTCCAATTAGAGTCGTTAAAAATTTAACG…
