# Supplementary material for: Eliminating Mosquitoes with Precision Guided Sterile Males
Source: Research Square preprint supplement (doi:10.21203/rs.3.rs-367110/v1), 2021-04-05
Supplement: Supplementary file 10 [file Table S2- embryo microinjection and transgenic line generation.xlsx]

## Sheet: Sheet1
	Table S2. Embryo microinjection and transgenic line generation
	Plasmid	Add gene ID #	# embryos injected	# G0 (%survivors)	# of Transgnic Lines Established
	OA-1067A1: gRNA-β-Tub	164847	1000	753 (75.3)	10
	OA-1067K: gRNA-myo-fem	164848	500	366 (73.2)	5
	OA-874PA: Nup50-Cas9	164846	100	69 (69.0)	1
	* See Methods
				Total Transgenic Lines generated in this study	16
