# Supplementary material for: Eliminating Mosquitoes with Precision Guided Sterile Males
Source: Research Square preprint supplement (doi:10.21203/rs.3.rs-367110/v1), 2021-04-05
Supplement: Supplementary file 11 [file Table S3 - Single gene disruption_.xlsx]

## Sheet: gRNAβTub = 1067A1
	Table S3 - Single gene disruption
	gRNA[βTub] = 1067A1
	Group	Parents of the cross	Test Group	Egg #	Hatched egg #	Hatched eggs (%)
	wt control	1 wt♂ X 10 wt♀	wt♂	595	576	96.8067
	wt control	1 wt♂ X 10 wt♀	wt♂	602	587	97.5083
	wt control	1 wt♂ X 10 wt♀	wt♂	557	539	96.7684
	wt control	1 wt♂ X 10 wt♀	wt♂	539	523	97.0315
	wt control	1 wt♂ X 10 wt♀	wt♂	540	514	95.1852
	wt control	50 wt♂ X 50 wt♀	wt♂	5681	5534	97.4124
	wt control	50 wt♂ X 50 wt♀	wt♂	4725	4517	95.5979
	wt control	50 wt♂ X 50 wt♀	wt♂	5593	5501	98.3551
	wt control	50 wt♂ X 50 wt♀	wt♂	5059	4854	95.9478
	wt control	50 wt♂ X 50 wt♀	wt♂	5930	5778	97.4368
	Nup50 control	1 nup50-Cas9/nup50-Cas9♂ X 10 wt♀	nup50-Cas9/nup50-Cas9 ♂	497	443	89.1348
	Nup50 control	1 nup50-Cas9/nup50-Cas9♂ X 10 wt♀	nup50-Cas9/nup50-Cas9 ♂	395	372	94.1772
	Nup50 control	1 nup50-Cas9/nup50-Cas9♂ X 10 wt♀	nup50-Cas9/nup50-Cas9 ♂	469	396	84.435
	Nup50 control	1 nup50-Cas9/nup50-Cas9♂ X 10 wt♀	nup50-Cas9/nup50-Cas9 ♂	546	480	87.9121
	Nup50 control	1 nup50-Cas9/nup50-Cas9♂ X 10 wt♀	nup50-Cas9/nup50-Cas9 ♂	584	521	89.2123
	Nup50 control	1 wt♂ X 10 nup50-Cas9/nup50-Cas9♀	nup50-Cas9/nup50-Cas9 ♀	547	462	84.4607
	Nup50 control	1 wt♂ X 10 nup50-Cas9/nup50-Cas9♀	nup50-Cas9/nup50-Cas9 ♀	583	486	83.3619
	Nup50 control	1 wt♂ X 10 nup50-Cas9/nup50-Cas9♀	nup50-Cas9/nup50-Cas9 ♀	558	441	79.0323
	Nup50 control	1 wt♂ X 10 nup50-Cas9/nup50-Cas9♀	nup50-Cas9/nup50-Cas9 ♀	603	515	85.4063
	Nup50 control	1 wt♂ X 10 nup50-Cas9/nup50-Cas9♀	nup50-Cas9/nup50-Cas9 ♀	530	448	84.5283
	Parent Cross	1 gRNA[βTub]#01/+♂ X 10 nup50-Cas9/nup50-Cas9♀	gRNA[βTub]#01/+ ♂	784	661	84.3112
	Parent Cross	1 gRNA[βTub]#01/+♂ X 10 nup50-Cas9/nup50-Cas9♀	gRNA[βTub]#01/+ ♂	561	475	84.6702
	Parent Cross	1 gRNA[βTub]#01/+♂ X 10 nup50-Cas9/nup50-Cas9♀	gRNA[βTub]#01/+ ♂	598	539	90.1338
	Parent Cross	10 gRNA[βTub]#01/+♀ X 1 nup50-Cas9/nup50-Cas9♂	gRNA[βTub]#01/+ ♀	402	357	88.806
	Parent Cross	10 gRNA[βTub]#01/+♀ X 1 nup50-Cas9/nup50-Cas9♂	gRNA[βTub]#01/+ ♀	419	384	91.6468
	Parent Cross	10 gRNA[βTub]#01/+♀ X 1 nup50-Cas9/nup50-Cas9♂	gRNA[βTub]#01/+ ♀	438	404	92.2374
	Transheterozygote wt Cross	50 gRNA[βTub]#01♂/+; nup50-Cas9♀/+ ♂ X 50 wt♀	gRNA[βTub]#01♂/+;nup50-Cas9♀/+ ♂	5090	39	0.766208
	Transheterozygote wt Cross	50 gRNA[βTub]#01♂/+; nup50-Cas9♀/+ ♂ X 50 wt♀	gRNA[βTub]#01♂/+;nup50-Cas9♀/+ ♂	4283	44	1.02732
	Transheterozygote wt Cross	50 gRNA[βTub]#01♂/+; nup50-Cas9♀/+ ♂ X 50 wt♀	gRNA[βTub]#01♂/+;nup50-Cas9♀/+ ♂	4470	32	0.715884
	Transheterozygote wt Cross	50 gRNA[βTub]#01♂/+; nup50-Cas9♀/+ ♀ X 50 wt♂	gRNA[βTub]#01♂/+;nup50-Cas9♀/+ ♀	4732	4531	95.7523
	Transheterozygote wt Cross	50 gRNA[βTub]#01♂/+; nup50-Cas9♀/+ ♀ X 50 wt♂	gRNA[βTub]#01♂/+;nup50-Cas9♀/+ ♀	3874	3629	93.6758
	Transheterozygote wt Cross	50 gRNA[βTub]#01♂/+; nup50-Cas9♀/+ ♀ X 50 wt♂	gRNA[βTub]#01♂/+;nup50-Cas9♀/+ ♀	3767	3518	93.39
	Transheterozygote wt Cross	50 gRNA[βTub]#01♀/+; nup50-Cas9♂/+ ♂ X 50 wt♀	gRNA[βTub]#01♀/+;nup50-Cas9♂/+ ♂	4045	105	2.5958
	Transheterozygote wt Cross	50 gRNA[βTub]#01♀/+; nup50-Cas9♂/+ ♂ X 50 wt♀	gRNA[βTub]#01♀/+;nup50-Cas9♂/+ ♂	5530	173	3.12839
	Transheterozygote wt Cross	50 gRNA[βTub]#01♀/+; nup50-Cas9♂/+ ♂ X 50 wt♀	gRNA[βTub]#01♀/+;nup50-Cas9♂/+ ♂	4331	98	2.26276
	Transheterozygote wt Cross	50 gRNA[βTub]#01♀/+; nup50-Cas9♂/+ ♀ X 50 wt♂	gRNA[βTub]#01♀/+;nup50-Cas9♂/+ ♀	4555	4113	90.2964
	Transheterozygote wt Cross	50 gRNA[βTub]#01♀/+; nup50-Cas9♂/+ ♀ X 50 wt♂	gRNA[βTub]#01♀/+;nup50-Cas9♂/+ ♀	3747	3402	90.7926
	Transheterozygote wt Cross	50 gRNA[βTub]#01♀/+; nup50-Cas9♂/+ ♀ X 50 wt♂	gRNA[βTub]#01♀/+;nup50-Cas9♂/+ ♀	4513	4212	93.3304
	Parent Cross	1 gRNA[βTub]#02/+♂ X 10 nup50-Cas9/nup50-Cas9♀	gRNA[βTub]#02/+ ♂	653	574	87.902
	Parent Cross	1 gRNA[βTub]#02/+♂ X 10 nup50-Cas9/nup50-Cas9♀	gRNA[βTub]#02/+ ♂	460	392	85.2174
	Parent Cross	1 gRNA[βTub]#02/+♂ X 10 nup50-Cas9/nup50-Cas9♀	gRNA[βTub]#02/+ ♂	751	651	86.6844
	Parent Cross	10 gRNA[βTub]#02/+♀ X 1 nup50-Cas9/nup50-Cas9♂	gRNA[βTub]#02/+ ♀	438	391	89.2694
	Parent Cross	10 gRNA[βTub]#02/+♀ X 1 nup50-Cas9/nup50-Cas9♂	gRNA[βTub]#02/+ ♀	445	388	87.191
	Parent Cross	10 gRNA[βTub]#02/+♀ X 1 nup50-Cas9/nup50-Cas9♂	gRNA[βTub]#02/+ ♀	472	408	86.4407
	Transheterozygote wt Cross	50 gRNA[βTub]#02♂/+; nup50-Cas9♀/+ ♂ X 50 wt♀	gRNA[βTub]#02♂/+;nup50-Cas9♀/+ ♂	4773	2212	46.344
	Transheterozygote wt Cross	50 gRNA[βTub]#02♂/+; nup50-Cas9♀/+ ♂ X 50 wt♀	gRNA[βTub]#02♂/+;nup50-Cas9♀/+ ♂	5075	2503	49.3202
	Transheterozygote wt Cross	50 gRNA[βTub]#02♂/+; nup50-Cas9♀/+ ♂ X 50 wt♀	gRNA[βTub]#02♂/+;nup50-Cas9♀/+ ♂	4632	2017	43.5449
	Transheterozygote wt Cross	50 gRNA[βTub]#02♂/+; nup50-Cas9♀/+ ♀ X 50 wt♂	gRNA[βTub]#02♂/+;nup50-Cas9♀/+ ♀	5153	4911	95.3037
	Transheterozygote wt Cross	50 gRNA[βTub]#02♂/+; nup50-Cas9♀/+ ♀ X 50 wt♂	gRNA[βTub]#02♂/+;nup50-Cas9♀/+ ♀	4011	3815	95.1134
	Transheterozygote wt Cross	50 gRNA[βTub]#02♂/+; nup50-Cas9♀/+ ♀ X 50 wt♂	gRNA[βTub]#02♂/+;nup50-Cas9♀/+ ♀	5316	4889	91.9676
	Transheterozygote wt Cross	50 gRNA[βTub]#02♀/+; nup50-Cas9♂/+ ♂ X 50 wt♀	gRNA[βTub]#02♀/+;nup50-Cas9♂/+ ♂	4832	2913	60.2856
	Transheterozygote wt Cross	50 gRNA[βTub]#02♀/+; nup50-Cas9♂/+ ♂ X 50 wt♀	gRNA[βTub]#02♀/+;nup50-Cas9♂/+ ♂	3976	2230	56.0865
	Transheterozygote wt Cross	50 gRNA[βTub]#02♀/+; nup50-Cas9♂/+ ♂ X 50 wt♀	gRNA[βTub]#02♀/+;nup50-Cas9♂/+ ♂	5175	3231	62.4348
	Transheterozygote wt Cross	50 gRNA[βTub]#02♀/+; nup50-Cas9♂/+ ♀ X 50 wt♂	gRNA[βTub]#02♀/+;nup50-Cas9♂/+ ♀	3575	3106	86.8811
	Transheterozygote wt Cross	50 gRNA[βTub]#02♀/+; nup50-Cas9♂/+ ♀ X 50 wt♂	gRNA[βTub]#02♀/+;nup50-Cas9♂/+ ♀	4430	3899	88.0135
	Transheterozygote wt Cross	50 gRNA[βTub]#02♀/+; nup50-Cas9♂/+ ♀ X 50 wt♂	gRNA[βTub]#02♀/+;nup50-Cas9♂/+ ♀	4022	3579	88.9856
	Parent Cross	1 gRNA[βTub]#03/+♂ X 10 nup50-Cas9/nup50-Cas9♀	gRNA[βTub]#03/+ ♂	767	689	89.8305
	Parent Cross	1 gRNA[βTub]#03/+♂ X 10 nup50-Cas9/nup50-Cas9♀	gRNA[βTub]#03/+ ♂	613	536	87.4388
	Parent Cross	1 gRNA[βTub]#03/+♂ X 10 nup50-Cas9/nup50-Cas9♀	gRNA[βTub]#03/+ ♂	672	603	89.7321
	Parent Cross	10 gRNA[βTub]#03/+♀ X 1 nup50-Cas9/nup50-Cas9♂	gRNA[βTub]#03/+ ♀	512	464	90.625
	Parent Cross	10 gRNA[βTub]#03/+♀ X 1 nup50-Cas9/nup50-Cas9♂	gRNA[βTub]#03/+ ♀	356	317	89.0449
	Parent Cross	10 gRNA[βTub]#03/+♀ X 1 nup50-Cas9/nup50-Cas9♂	gRNA[βTub]#03/+ ♀	455	398	87.4725
	Transheterozygote wt Cross	50 gRNA[βTub]#03♂/+; nup50-Cas9♀/+ ♂ X 50 wt♀	gRNA[βTub]#03♂/+;nup50-Cas9♀/+ ♂	5137	0	0
	Transheterozygote wt Cross	50 gRNA[βTub]#03♂/+; nup50-Cas9♀/+ ♂ X 50 wt♀	gRNA[βTub]#03♂/+;nup50-Cas9♀/+ ♂	4620	0	0
	Transheterozygote wt Cross	50 gRNA[βTub]#03♂/+; nup50-Cas9♀/+ ♂ X 50 wt♀	gRNA[βTub]#03♂/+;nup50-Cas9♀/+ ♂	4894	0	0
	Transheterozygote wt Cross	50 gRNA[βTub]#03♂/+; nup50-Cas9♀/+ ♀ X 50 wt♂	gRNA[βTub]#03♂/+;nup50-Cas9♀/+ ♀	4578	4179	91.2844
	Transheterozygote wt Cross	50 gRNA[βTub]#03♂/+; nup50-Cas9♀/+ ♀ X 50 wt♂	gRNA[βTub]#03♂/+;nup50-Cas9♀/+ ♀	4266	3822	89.5921
	Transheterozygote wt Cross	50 gRNA[βTub]#03♂/+; nup50-Cas9♀/+ ♀ X 50 wt♂	gRNA[βTub]#03♂/+;nup50-Cas9♀/+ ♀	4465	4218	94.4681
	Transheterozygote wt Cross	50 gRNA[βTub]#03♀/+; nup50-Cas9♂/+ ♂ X 50 wt♀	gRNA[βTub]#03♀/+;nup50-Cas9♂/+ ♂	4720	0	0
	Transheterozygote wt Cross	50 gRNA[βTub]#03♀/+; nup50-Cas9♂/+ ♂ X 50 wt♀	gRNA[βTub]#03♀/+;nup50-Cas9♂/+ ♂	4532	0	0
	Transheterozygote wt Cross	50 gRNA[βTub]#03♀/+; nup50-Cas9♂/+ ♂ X 50 wt♀	gRNA[βTub]#03♀/+;nup50-Cas9♂/+ ♂	4852	0	0
	Transheterozygote wt Cross	50 gRNA[βTub]#03♀/+; nup50-Cas9♂/+ ♀ X 50 wt♂	gRNA[βTub]#03♀/+;nup50-Cas9♂/+ ♀	4410	4005	90.8163
	Transheterozygote wt Cross	50 gRNA[βTub]#03♀/+; nup50-Cas9♂/+ ♀ X 50 wt♂	gRNA[βTub]#03♀/+;nup50-Cas9♂/+ ♀	4525	3995	88.2873
	Transheterozygote wt Cross	50 gRNA[βTub]#03♀/+; nup50-Cas9♂/+ ♀ X 50 wt♂	gRNA[βTub]#03♀/+;nup50-Cas9♂/+ ♀	3227	2892	89.6188
	Parent Cross	1 gRNA[βTub]#04/+♂ X 10 nup50-Cas9/nup50-Cas9♀	gRNA[βTub]#04/+ ♂	543	466	85.8195
	Parent Cross	1 gRNA[βTub]#04/+♂ X 10 nup50-Cas9/nup50-Cas9♀	gRNA[βTub]#04/+ ♂	665	553	83.1579
	Parent Cross	1 gRNA[βTub]#04/+♂ X 10 nup50-Cas9/nup50-Cas9♀	gRNA[βTub]#04/+ ♂	596	514	86.2416
	Parent Cross	10 gRNA[βTub]#04/+♀ X 1 nup50-Cas9/nup50-Cas9♂	gRNA[βTub]#04/+ ♀	458	402	87.7729
	Parent Cross	10 gRNA[βTub]#04/+♀ X 1 nup50-Cas9/nup50-Cas9♂	gRNA[βTub]#04/+ ♀	437	395	90.389
	Parent Cross	10 gRNA[βTub]#04/+♀ X 1 nup50-Cas9/nup50-Cas9♂	gRNA[βTub]#04/+ ♀	423	371	87.7069
	Transheterozygote wt Cross	50 gRNA[βTub]#04♂/+; nup50-Cas9♀/+ ♂ X 50 wt♀	gRNA[βTub]#04♂/+;nup50-Cas9♀/+ ♂	5506	4748	86.2332
	Transheterozygote wt Cross	50 gRNA[βTub]#04♂/+; nup50-Cas9♀/+ ♂ X 50 wt♀	gRNA[βTub]#04♂/+;nup50-Cas9♀/+ ♂	4879	4146	84.9764
	Transheterozygote wt Cross	50 gRNA[βTub]#04♂/+; nup50-Cas9♀/+ ♂ X 50 wt♀	gRNA[βTub]#04♂/+;nup50-Cas9♀/+ ♂	4015	3810	94.8941
	Transheterozygote wt Cross	50 gRNA[βTub]#04♂/+; nup50-Cas9♀/+ ♀ X 50 wt♂	gRNA[βTub]#04♂/+;nup50-Cas9♀/+ ♀	5230	4805	91.8738
	Transheterozygote wt Cross	50 gRNA[βTub]#04♂/+; nup50-Cas9♀/+ ♀ X 50 wt♂	gRNA[βTub]#04♂/+;nup50-Cas9♀/+ ♀	4418	4101	92.8248
	Transheterozygote wt Cross	50 gRNA[βTub]#04♂/+; nup50-Cas9♀/+ ♀ X 50 wt♂	gRNA[βTub]#04♂/+;nup50-Cas9♀/+ ♀	5281	4632	87.7107
	Transheterozygote wt Cross	50 gRNA[βTub]#04♀/+; nup50-Cas9♂/+ ♂ X 50 wt♀	gRNA[βTub]#04♀/+;nup50-Cas9♂/+ ♂	3875	3627	93.6
	Transheterozygote wt Cross	50 gRNA[βTub]#04♀/+; nup50-Cas9♂/+ ♂ X 50 wt♀	gRNA[βTub]#04♀/+;nup50-Cas9♂/+ ♂	4420	4043	91.4706
	Transheterozygote wt Cross	50 gRNA[βTub]#04♀/+; nup50-Cas9♂/+ ♂ X 50 wt♀	gRNA[βTub]#04♀/+;nup50-Cas9♂/+ ♂	4980	4325	86.8474
	Transheterozygote wt Cross	50 gRNA[βTub]#04♀/+; nup50-Cas9♂/+ ♀ X 50 wt♂	gRNA[βTub]#04♀/+;nup50-Cas9♂/+ ♀	3327	3072	92.3354
	Transheterozygote wt Cross	50 gRNA[βTub]#04♀/+; nup50-Cas9♂/+ ♀ X 50 wt♂	gRNA[βTub]#04♀/+;nup50-Cas9♂/+ ♀	3632	3317	91.3271
	Transheterozygote wt Cross	50 gRNA[βTub]#04♀/+; nup50-Cas9♂/+ ♀ X 50 wt♂	gRNA[βTub]#04♀/+;nup50-Cas9♂/+ ♀	4015	3864	96.2391
	Parent Cross	1 gRNA[βTub]#05/+♂ X 10 nup50-Cas9/nup50-Cas9♀	gRNA[βTub]#05/+ ♂	429	368	85.7809
	Parent Cross	1 gRNA[βTub]#05/+♂ X 10 nup50-Cas9/nup50-Cas9♀	gRNA[βTub]#05/+ ♂	712	619	86.9382
	Parent Cross	1 gRNA[βTub]#05/+♂ X 10 nup50-Cas9/nup50-Cas9♀	gRNA[βTub]#05/+ ♂	574	488	85.0174
	Parent Cross	10 gRNA[βTub]#05/+♀ X 1 nup50-Cas9/nup50-Cas9♂	gRNA[βTub]#05/+ ♀	556	483	86.8705
	Parent Cross	10 gRNA[βTub]#05/+♀ X 1 nup50-Cas9/nup50-Cas9♂	gRNA[βTub]#05/+ ♀	446	410	91.9283
	Parent Cross	10 gRNA[βTub]#05/+♀ X 1 nup50-Cas9/nup50-Cas9♂	gRNA[βTub]#05/+ ♀	394	340	86.2944
	Transheterozygote wt Cross	50 gRNA[βTub]#05♂/+; nup50-Cas9♀/+ ♂ X 50 wt♀	gRNA[βTub]#05♂/+;nup50-Cas9♀/+ ♂	4148	905	21.8177
	Transheterozygote wt Cross	50 gRNA[βTub]#05♂/+; nup50-Cas9♀/+ ♂ X 50 wt♀	gRNA[βTub]#05♂/+;nup50-Cas9♀/+ ♂	5152	1001	19.4293
	Transheterozygote wt Cross	50 gRNA[βTub]#05♂/+; nup50-Cas9♀/+ ♂ X 50 wt♀	gRNA[βTub]#05♂/+;nup50-Cas9♀/+ ♂	5116	1328	25.9578
	Transheterozygote wt Cross	50 gRNA[βTub]#05♂/+; nup50-Cas9♀/+ ♀ X 50 wt♂	gRNA[βTub]#05♂/+;nup50-Cas9♀/+ ♀	5517	4933	89.4145
	Transheterozygote wt Cross	50 gRNA[βTub]#05♂/+; nup50-Cas9♀/+ ♀ X 50 wt♂	gRNA[βTub]#05♂/+;nup50-Cas9♀/+ ♀	2375	2079	87.5368
	Transheterozygote wt Cross	50 gRNA[βTub]#05♂/+; nup50-Cas9♀/+ ♀ X 50 wt♂	gRNA[βTub]#05♂/+;nup50-Cas9♀/+ ♀	4172	3795	90.9636
	Transheterozygote wt Cross	50 gRNA[βTub]#05♀/+; nup50-Cas9♂/+ ♂ X 50 wt♀	gRNA[βTub]#05♀/+;nup50-Cas9♂/+ ♂	5430	2582	47.5506
	Transheterozygote wt Cross	50 gRNA[βTub]#05♀/+; nup50-Cas9♂/+ ♂ X 50 wt♀	gRNA[βTub]#05♀/+;nup50-Cas9♂/+ ♂	4873	2688	55.1611
	Transheterozygote wt Cross	50 gRNA[βTub]#05♀/+; nup50-Cas9♂/+ ♂ X 50 wt♀	gRNA[βTub]#05♀/+;nup50-Cas9♂/+ ♂	4762	1958	41.1172
	Transheterozygote wt Cross	50 gRNA[βTub]#05♀/+; nup50-Cas9♂/+ ♀ X 50 wt♂	gRNA[βTub]#05♀/+;nup50-Cas9♂/+ ♀	3972	3710	93.4038
	Transheterozygote wt Cross	50 gRNA[βTub]#05♀/+; nup50-Cas9♂/+ ♀ X 50 wt♂	gRNA[βTub]#05♀/+;nup50-Cas9♂/+ ♀	3237	3026	93.4816
	Transheterozygote wt Cross	50 gRNA[βTub]#05♀/+; nup50-Cas9♂/+ ♀ X 50 wt♂	gRNA[βTub]#05♀/+;nup50-Cas9♂/+ ♀	4677	4310	92.1531
	Parent Cross	1 gRNA[βTub]#06/+♂ X 10 nup50-Cas9/nup50-Cas9♀	gRNA[βTub]#06/+ ♂	735	660	89.7959
	Parent Cross	1 gRNA[βTub]#06/+♂ X 10 nup50-Cas9/nup50-Cas9♀	gRNA[βTub]#06/+ ♂	619	516	83.3603
	Parent Cross	1 gRNA[βTub]#06/+♂ X 10 nup50-Cas9/nup50-Cas9♀	gRNA[βTub]#06/+ ♂	488	410	84.0164
	Parent Cross	10 gRNA[βTub]#06/+♀ X 1 nup50-Cas9/nup50-Cas9♂	gRNA[βTub]#06/+ ♀	389	348	89.4602
	Parent Cross	10 gRNA[βTub]#06/+♀ X 1 nup50-Cas9/nup50-Cas9♂	gRNA[βTub]#06/+ ♀	402	371	92.2886
	Parent Cross	10 gRNA[βTub]#06/+♀ X 1 nup50-Cas9/nup50-Cas9♂	gRNA[βTub]#06/+ ♀	533	487	91.3696
	Transheterozygote wt Cross	50 gRNA[βTub]#06♂/+; nup50-Cas9♀/+ ♂ X 50 wt♀	gRNA[βTub]#06♂/+;nup50-Cas9♀/+ ♂	3714	103	2.77329
	Transheterozygote wt Cross	50 gRNA[βTub]#06♂/+; nup50-Cas9♀/+ ♂ X 50 wt♀	gRNA[βTub]#06♂/+;nup50-Cas9♀/+ ♂	5066	114	2.2503
	Transheterozygote wt Cross	50 gRNA[βTub]#06♂/+; nup50-Cas9♀/+ ♂ X 50 wt♀	gRNA[βTub]#06♂/+;nup50-Cas9♀/+ ♂	5013	172	3.43108
	Transheterozygote wt Cross	50 gRNA[βTub]#06♂/+; nup50-Cas9♀/+ ♀ X 50 wt♂	gRNA[βTub]#06♂/+;nup50-Cas9♀/+ ♀	4927	4512	91.577
	Transheterozygote wt Cross	50 gRNA[βTub]#06♂/+; nup50-Cas9♀/+ ♀ X 50 wt♂	gRNA[βTub]#06♂/+;nup50-Cas9♀/+ ♀	3482	3188	91.5566
	Transheterozygote wt Cross	50 gRNA[βTub]#06♂/+; nup50-Cas9♀/+ ♀ X 50 wt♂	gRNA[βTub]#06♂/+;nup50-Cas9♀/+ ♀	4416	4010	90.8062
	Transheterozygote wt Cross	50 gRNA[βTub]#06♀/+; nup50-Cas9♂/+ ♂ X 50 wt♀	gRNA[βTub]#06♀/+;nup50-Cas9♂/+ ♂	5017	511	10.1854
	Transheterozygote wt Cross	50 gRNA[βTub]#06♀/+; nup50-Cas9♂/+ ♂ X 50 wt♀	gRNA[βTub]#06♀/+;nup50-Cas9♂/+ ♂	4715	368	7.80488
	Transheterozygote wt Cross	50 gRNA[βTub]#06♀/+; nup50-Cas9♂/+ ♂ X 50 wt♀	gRNA[βTub]#06♀/+;nup50-Cas9♂/+ ♂	4497	515	11.4521
	Transheterozygote wt Cross	50 gRNA[βTub]#06♀/+; nup50-Cas9♂/+ ♀ X 50 wt♂	gRNA[βTub]#06♀/+;nup50-Cas9♂/+ ♀	5253	4957	94.3651
	Transheterozygote wt Cross	50 gRNA[βTub]#06♀/+; nup50-Cas9♂/+ ♀ X 50 wt♂	gRNA[βTub]#06♀/+;nup50-Cas9♂/+ ♀	5438	4972	91.4307
	Transheterozygote wt Cross	50 gRNA[βTub]#06♀/+; nup50-Cas9♂/+ ♀ X 50 wt♂	gRNA[βTub]#06♀/+;nup50-Cas9♂/+ ♀	3576	3346	93.5682
	Parent Cross	50 gRNA[βTub]#07/+♂ X 50 wt♀	gRNA[βTub]#07/+ ♂	4279	4022	93.9939
	Parent Cross	50 gRNA[βTub]#07/+♂ X 50 wt♀	gRNA[βTub]#07/+ ♂	4763	4518	94.8562
	Parent Cross	50 gRNA[βTub]#07/+♂ X 50 wt♀	gRNA[βTub]#07/+ ♂	4710	4274	90.7431
	Parent Cross	50 gRNA[βTub]#07/+♀ X 50 wt ♂	gRNA[βTub]#07/+ ♀	5025	4762	94.7662
	Parent Cross	50 gRNA[βTub]#07/+♀ X 50 wt ♂	gRNA[βTub]#07/+ ♀	4233	3769	89.0385
	Parent Cross	50 gRNA[βTub]#07/+♀ X 50 wt ♂	gRNA[βTub]#07/+ ♀	4478	4011	89.5712
	Parent Cross	1 gRNA[βTub]#07/+♂ X 10 nup50-Cas9/nup50-Cas9♀	gRNA[βTub]#07/+; nup50-Cas9/+♂	801	692	86.392
	Parent Cross	1 gRNA[βTub]#07/+♂ X 10 nup50-Cas9/nup50-Cas9♀	gRNA[βTub]#07/+; nup50-Cas9/+♂	520	457	87.8846
	Parent Cross	1 gRNA[βTub]#07/+♂ X 10 nup50-Cas9/nup50-Cas9♀	gRNA[βTub]#07/+; nup50-Cas9/+♂	632	557	88.1329
	Parent Cross	10 gRNA[βTub]#07/+♀ X 1 nup50-Cas9/nup50-Cas9♂	gRNA[βTub]#07/+; nup50-Cas9/+ ♀	570	514	90.1754
	Parent Cross	10 gRNA[βTub]#07/+♀ X 1 nup50-Cas9/nup50-Cas9♂	gRNA[βTub]#07/+; nup50-Cas9/+ ♀	541	468	86.5065
	Parent Cross	10 gRNA[βTub]#07/+♀ X 1 nup50-Cas9/nup50-Cas9♂	gRNA[βTub]#07/+; nup50-Cas9/+ ♀	518	458	88.417
	Transheterozygote wt Cross	50 gRNA[βTub]#07♂/+; nup50-Cas9♀/+ ♂ X 50 wt♀	gRNA[βTub]#07♂/+;nup50-Cas9♀/+ ♂	4029	0	0
	Transheterozygote wt Cross	50 gRNA[βTub]#07♂/+; nup50-Cas9♀/+ ♂ X 50 wt♀	gRNA[βTub]#07♂/+;nup50-Cas9♀/+ ♂	4768	0	0
	Transheterozygote wt Cross	50 gRNA[βTub]#07♂/+; nup50-Cas9♀/+ ♂ X 50 wt♀	gRNA[βTub]#07♂/+;nup50-Cas9♀/+ ♂	4470	0	0
	Transheterozygote wt Cross	50 gRNA[βTub]#07♂/+; nup50-Cas9♀/+ ♀ X 50 wt♂	gRNA[βTub]#07♂/+;nup50-Cas9♀/+ ♀	5418	4798	88.5567
	Transheterozygote wt Cross	50 gRNA[βTub]#07♂/+; nup50-Cas9♀/+ ♀ X 50 wt♂	gRNA[βTub]#07♂/+;nup50-Cas9♀/+ ♀	4416	3959	89.6513
	Transheterozygote wt Cross	50 gRNA[βTub]#07♂/+; nup50-Cas9♀/+ ♀ X 50 wt♂	gRNA[βTub]#07♂/+;nup50-Cas9♀/+ ♀	4673	4257	91.0978
	Transheterozygote wt Cross	50 gRNA[βTub]#07♀/+; nup50-Cas9♂/+ ♂ X 50 wt♀	gRNA[βTub]#07♀/+;nup50-Cas9♂/+ ♂	4831	0	0
	Transheterozygote wt Cross	50 gRNA[βTub]#07♀/+; nup50-Cas9♂/+ ♂ X 50 wt♀	gRNA[βTub]#07♀/+;nup50-Cas9♂/+ ♂	4055	0	0
	Transheterozygote wt Cross	50 gRNA[βTub]#07♀/+; nup50-Cas9♂/+ ♂ X 50 wt♀	gRNA[βTub]#07♀/+;nup50-Cas9♂/+ ♂	5158	0	0
	Transheterozygote wt Cross	50 gRNA[βTub]#07♀/+; nup50-Cas9♂/+ ♀ X 50 wt♂	gRNA[βTub]#07♀/+;nup50-Cas9♂/+ ♀	3401	3081	90.591
	Transheterozygote wt Cross	50 gRNA[βTub]#07♀/+; nup50-Cas9♂/+ ♀ X 50 wt♂	gRNA[βTub]#07♀/+;nup50-Cas9♂/+ ♀	3989	3611	90.5239
	Transheterozygote wt Cross	50 gRNA[βTub]#07♀/+; nup50-Cas9♂/+ ♀ X 50 wt♂	gRNA[βTub]#07♀/+;nup50-Cas9♂/+ ♀	4414	4079	92.4105
	Parent Cross	1 gRNA[βTub]#08/+♂ X 10 nup50-Cas9/nup50-Cas9♀	gRNA[βTub]#08/+ ♂	468	404	86.3248
	Parent Cross	1 gRNA[βTub]#08/+♂ X 10 nup50-Cas9/nup50-Cas9♀	gRNA[βTub]#08/+ ♂	789	690	87.4525
	Parent Cross	1 gRNA[βTub]#08/+♂ X 10 nup50-Cas9/nup50-Cas9♀	gRNA[βTub]#08/+ ♂	721	618	85.7143
	Parent Cross	10 gRNA[βTub]#08/+♀ X 1 nup50-Cas9/nup50-Cas9♂	gRNA[βTub]#08/+ ♀	378	329	87.037
	Parent Cross	10 gRNA[βTub]#08/+♀ X 1 nup50-Cas9/nup50-Cas9♂	gRNA[βTub]#08/+ ♀	542	483	89.1144
	Parent Cross	10 gRNA[βTub]#08/+♀ X 1 nup50-Cas9/nup50-Cas9♂	gRNA[βTub]#08/+ ♀	425	374	88
	Transheterozygote wt Cross	50 gRNA[βTub]#08♂/+; nup50-Cas9♀/+ ♂ X 50 wt♀	gRNA[βTub]#08♂/+;nup50-Cas9♀/+ ♂	5370	1531	28.5102
	Transheterozygote wt Cross	50 gRNA[βTub]#08♂/+; nup50-Cas9♀/+ ♂ X 50 wt♀	gRNA[βTub]#08♂/+;nup50-Cas9♀/+ ♂	4147	998	24.0656
	Transheterozygote wt Cross	50 gRNA[βTub]#08♂/+; nup50-Cas9♀/+ ♂ X 50 wt♀	gRNA[βTub]#08♂/+;nup50-Cas9♀/+ ♂	5563	1022	18.3714
	Transheterozygote wt Cross	50 gRNA[βTub]#08♂/+; nup50-Cas9♀/+ ♀ X 50 wt♂	gRNA[βTub]#08♂/+;nup50-Cas9♀/+ ♀	5413	5010	92.555
	Transheterozygote wt Cross	50 gRNA[βTub]#08♂/+; nup50-Cas9♀/+ ♀ X 50 wt♂	gRNA[βTub]#08♂/+;nup50-Cas9♀/+ ♀	4824	4433	91.8947
	Transheterozygote wt Cross	50 gRNA[βTub]#08♂/+; nup50-Cas9♀/+ ♀ X 50 wt♂	gRNA[βTub]#08♂/+;nup50-Cas9♀/+ ♀	3668	3301	89.9945
	Transheterozygote wt Cross	50 gRNA[βTub]#08♀/+; nup50-Cas9♂/+ ♂ X 50 wt♀	gRNA[βTub]#08♀/+;nup50-Cas9♂/+ ♂	4178	1619	38.7506
	Transheterozygote wt Cross	50 gRNA[βTub]#08♀/+; nup50-Cas9♂/+ ♂ X 50 wt♀	gRNA[βTub]#08♀/+;nup50-Cas9♂/+ ♂	5218	2411	46.2054
	Transheterozygote wt Cross	50 gRNA[βTub]#08♀/+; nup50-Cas9♂/+ ♂ X 50 wt♀	gRNA[βTub]#08♀/+;nup50-Cas9♂/+ ♂	5072	1762	34.7397
	Transheterozygote wt Cross	50 gRNA[βTub]#08♀/+; nup50-Cas9♂/+ ♀ X 50 wt♂	gRNA[βTub]#08♀/+;nup50-Cas9♂/+ ♀	4670	4376	93.7045
	Transheterozygote wt Cross	50 gRNA[βTub]#08♀/+; nup50-Cas9♂/+ ♀ X 50 wt♂	gRNA[βTub]#08♀/+;nup50-Cas9♂/+ ♀	4393	4016	91.4182
	Transheterozygote wt Cross	50 gRNA[βTub]#08♀/+; nup50-Cas9♂/+ ♀ X 50 wt♂	gRNA[βTub]#08♀/+;nup50-Cas9♂/+ ♀	3733	3410	91.3474
	Parent Cross	1 gRNA[βTub]#09/+♂ X 10 nup50-Cas9/nup50-Cas9♀	gRNA[βTub]#09/+ ♂	620	549	88.5484
	Parent Cross	1 gRNA[βTub]#09/+♂ X 10 nup50-Cas9/nup50-Cas9♀	gRNA[βTub]#09/+ ♂	492	424	86.1789
	Parent Cross	1 gRNA[βTub]#09/+♂ X 10 nup50-Cas9/nup50-Cas9♀	gRNA[βTub]#09/+ ♂	539	461	85.5288
	Parent Cross	10 gRNA[βTub]#09/+♀ X 1 nup50-Cas9/nup50-Cas9♂	gRNA[βTub]#09/+ ♀	419	375	89.4988
	Parent Cross	10 gRNA[βTub]#09/+♀ X 1 nup50-Cas9/nup50-Cas9♂	gRNA[βTub]#09/+ ♀	443	399	90.0677
	Parent Cross	10 gRNA[βTub]#09/+♀ X 1 nup50-Cas9/nup50-Cas9♂	gRNA[βTub]#09/+ ♀	436	395	90.5963
	Transheterozygote wt Cross	50 gRNA[βTub]#09♂/+; nup50-Cas9♀/+ ♂ X 50 wt♀	gRNA[βTub]#09♂/+;nup50-Cas9♀/+ ♂	3945	226	5.72877
	Transheterozygote wt Cross	50 gRNA[βTub]#09♂/+; nup50-Cas9♀/+ ♂ X 50 wt♀	gRNA[βTub]#09♂/+;nup50-Cas9♀/+ ♂	4533	218	4.80918
	Transheterozygote wt Cross	50 gRNA[βTub]#09♂/+; nup50-Cas9♀/+ ♂ X 50 wt♀	gRNA[βTub]#09♂/+;nup50-Cas9♀/+ ♂	4325	176	4.06936
	Transheterozygote wt Cross	50 gRNA[βTub]#09♂/+; nup50-Cas9♀/+ ♀ X 50 wt♂	gRNA[βTub]#09♂/+;nup50-Cas9♀/+ ♀	4962	4482	90.3265
	Transheterozygote wt Cross	50 gRNA[βTub]#09♂/+; nup50-Cas9♀/+ ♀ X 50 wt♂	gRNA[βTub]#09♂/+;nup50-Cas9♀/+ ♀	3529	3290	93.2275
	Transheterozygote wt Cross	50 gRNA[βTub]#09♂/+; nup50-Cas9♀/+ ♀ X 50 wt♂	gRNA[βTub]#09♂/+;nup50-Cas9♀/+ ♀	3201	2973	92.8772
	Transheterozygote wt Cross	50 gRNA[βTub]#09♀/+; nup50-Cas9♂/+ ♂ X 50 wt♀	gRNA[βTub]#09♀/+;nup50-Cas9♂/+ ♂	5255	776	14.7669
	Transheterozygote wt Cross	50 gRNA[βTub]#09♀/+; nup50-Cas9♂/+ ♂ X 50 wt♀	gRNA[βTub]#09♀/+;nup50-Cas9♂/+ ♂	4379	598	13.6561
	Transheterozygote wt Cross	50 gRNA[βTub]#09♀/+; nup50-Cas9♂/+ ♂ X 50 wt♀	gRNA[βTub]#09♀/+;nup50-Cas9♂/+ ♂	4764	780	16.3728
	Transheterozygote wt Cross	50 gRNA[βTub]#09♀/+; nup50-Cas9♂/+ ♀ X 50 wt♂	gRNA[βTub]#09♀/+;nup50-Cas9♂/+ ♀	3717	3339	89.8305
	Transheterozygote wt Cross	50 gRNA[βTub]#09♀/+; nup50-Cas9♂/+ ♀ X 50 wt♂	gRNA[βTub]#09♀/+;nup50-Cas9♂/+ ♀	4525	4114	90.9171
	Transheterozygote wt Cross	50 gRNA[βTub]#09♀/+; nup50-Cas9♂/+ ♀ X 50 wt♂	gRNA[βTub]#09♀/+;nup50-Cas9♂/+ ♀	3890	3612	92.8535
	Parent Cross	1 gRNA[βTub]#10/+♂ X 10 nup50-Cas9/nup50-Cas9♀	gRNA[βTub]#10/+ ♂	359	303	84.4011
	Parent Cross	1 gRNA[βTub]#10/+♂ X 10 nup50-Cas9/nup50-Cas9♀	gRNA[βTub]#10/+ ♂	523	455	86.9981
	Parent Cross	1 gRNA[βTub]#10/+♂ X 10 nup50-Cas9/nup50-Cas9♀	gRNA[βTub]#10/+ ♂	586	502	85.6655
	Parent Cross	10 gRNA[βTub]#10/+♀ X 1 nup50-Cas9/nup50-Cas9♂	gRNA[βTub]#10/+ ♀	424	386	91.0377
	Parent Cross	10 gRNA[βTub]#10/+♀ X 1 nup50-Cas9/nup50-Cas9♂	gRNA[βTub]#10/+ ♀	436	375	86.0092
	Parent Cross	10 gRNA[βTub]#10/+♀ X 1 nup50-Cas9/nup50-Cas9♂	gRNA[βTub]#10/+ ♀	460	416	90.4348
	Transheterozygote wt Cross	50 gRNA[βTub]#10♂/+; nup50-Cas9♀/+ ♂ X 50 wt♀	gRNA[βTub]#10♂/+;nup50-Cas9♀/+ ♂	4185	71	1.69654
	Transheterozygote wt Cross	50 gRNA[βTub]#10♂/+; nup50-Cas9♀/+ ♂ X 50 wt♀	gRNA[βTub]#10♂/+;nup50-Cas9♀/+ ♂	4771	109	2.28464
	Transheterozygote wt Cross	50 gRNA[βTub]#10♂/+; nup50-Cas9♀/+ ♂ X 50 wt♀	gRNA[βTub]#10♂/+;nup50-Cas9♀/+ ♂	4759	134	2.81572
	Transheterozygote wt Cross	50 gRNA[βTub]#10♂/+; nup50-Cas9♀/+ ♀ X 50 wt♂	gRNA[βTub]#10♂/+;nup50-Cas9♀/+ ♀	5019	4606	91.7713
	Transheterozygote wt Cross	50 gRNA[βTub]#10♂/+; nup50-Cas9♀/+ ♀ X 50 wt♂	gRNA[βTub]#10♂/+;nup50-Cas9♀/+ ♀	4185	3799	90.7766
	Transheterozygote wt Cross	50 gRNA[βTub]#10♂/+; nup50-Cas9♀/+ ♀ X 50 wt♂	gRNA[βTub]#10♂/+;nup50-Cas9♀/+ ♀	4212	3886	92.2602
	Transheterozygote wt Cross	50 gRNA[βTub]#10♀/+; nup50-Cas9♂/+ ♂ X 50 wt♀	gRNA[βTub]#10♀/+;nup50-Cas9♂/+ ♂	4344	538	12.3849
	Transheterozygote wt Cross	50 gRNA[βTub]#10♀/+; nup50-Cas9♂/+ ♂ X 50 wt♀	gRNA[βTub]#10♀/+;nup50-Cas9♂/+ ♂	5102	509	9.97648
	Transheterozygote wt Cross	50 gRNA[βTub]#10♀/+; nup50-Cas9♂/+ ♂ X 50 wt♀	gRNA[βTub]#10♀/+;nup50-Cas9♂/+ ♂	4046	573	14.1621
	Transheterozygote wt Cross	50 gRNA[βTub]#10♀/+; nup50-Cas9♂/+ ♀ X 50 wt♂	gRNA[βTub]#10♀/+;nup50-Cas9♂/+ ♀	2984	2784	93.2976
	Transheterozygote wt Cross	50 gRNA[βTub]#10♀/+; nup50-Cas9♂/+ ♀ X 50 wt♂	gRNA[βTub]#10♀/+;nup50-Cas9♂/+ ♀	3672	3415	93.0011
	Transheterozygote wt Cross	50 gRNA[βTub]#10♀/+; nup50-Cas9♂/+ ♀ X 50 wt♂	gRNA[βTub]#10♀/+;nup50-Cas9♂/+ ♀	4543	4219	92.8681

## Sheet: gRNAmyo-fem =  1067K
	Table S3 - Single gene disruption
	gRNA[myo-fem] = gRNA[Mhc] = 1067K
	Parents of the cross	Egg #	Hatched egg #	Hatching %	Adult#	larva-to-adult survival %	Test group	♂Pupae#	♂Pupal death#	♂ Pupa- adult survival %	Flightless ♂ #	Flight ♂ %	♀ Pupa #	♀Pupal death#	♀ Pupa- adult survival %	♀ Flightless #	♀ Flight %	Blood acquisition ♀#	♀ Blood acquisition %	♀:♂ adult %	Eggs by (wt / Cas9 / gRNA / F1 ♀ X wt ♂)	Hatched eggs by (wt / Cas9 / gRNA / F1 ♀ X wt ♂)	wt / Cas9 / gRNA / F1 ♀ fertility	Eggs by (wt ♀ X wt / Cas9 / gRNA / F1 ♂)	Hatch eggs by (wt ♀ X wt / Cas9 / gRNA / F1 ♂	wt / Cas9 / gRNA / F1 ♂ fertility
	1 wt♂ X 10 wt♀	595	576	96.8067	499	86.6319	wt	267	12	95.5056	0	100	251	7	97.2112	0	100	240	98.3607	95.6863			96.8067			96.8067
	1 wt♂ X 10 wt♀	602	587	97.5083	517	88.075	wt	255	7	97.2549	0	100	282	13	95.3901	0	100	265	98.513	108.468			97.5083			97.5083
	1 wt♂ X 10 wt♀	557	539	96.7684	451	83.6735	wt	238	11	95.3782	0	100	229	5	97.8166	0	100	220	98.2143	98.6784			96.7684			96.7684
	1 wt♂ X 10 wt♀	539	523	97.0315	490	93.6902	wt	243	9	96.2963	0	100	264	8	96.9697	0	100	251	98.0469	109.402			97.0315			97.0315
	1 wt♂ X 10 wt♀	554	539	97.2924	454	84.2301	wt	232	10	95.6897	0	100	245	13	94.6939	0	100	232	100	104.505			97.2924			97.2924
	1 wt♂ X 10 nup50-Cas9/nup50-Cas9♀	547	462	84.4607	405	87.6623	♀Cas9/+	222	9	95.9459	0	100	201	9	95.5224	0	100	190	98.9583	90.1408			84.4607
	1 wt♂ X 10 nup50-Cas9/nup50-Cas9♀	583	486	83.3619	416	85.5967	♀Cas9/+	226	11	95.1327	0	100	209	8	96.1722	0	100	198	98.5075	93.4884			83.3619
	1 wt♂ X 10 nup50-Cas9/nup50-Cas9♀	558	441	79.0323	366	82.9932	♀Cas9/+	193	9	95.3368	0	100	194	12	93.8144	0	100	181	99.4505	98.913			79.0323
	1 wt♂ X 10 nup50-Cas9/nup50-Cas9♀	603	515	85.4063	442	85.8252	♀Cas9/+	249	14	94.3775	0	100	217	10	95.3917	0	100	204	98.5507	88.0851			85.4063
	1 wt♂ X 10 nup50-Cas9/nup50-Cas9♀	530	448	84.5283	394	87.9464	♀Cas9/+	201	8	96.0199	0	100	214	13	93.9252	0	100	193	96.0199	104.145			84.5283
	1 nup50-Cas9/nup50-Cas9♂ X 10 wt♀	497	443	89.1348	393	88.7133	♂Cas9/+	215	13	93.9535	0	100	199	8	95.9799	0	100	187	97.9058	94.5545						89.1348
	1 nup50-Cas9/nup50-Cas9♂ X 10 wt♀	395	372	94.1772	301	80.914	♂Cas9/+	154	7	95.4545	0	100	160	6	96.25	0	100	154	100	104.762						94.1772
	1 nup50-Cas9/nup50-Cas9♂ X 10 wt♀	469	396	84.435	345	87.1212	♂Cas9/+	178	8	95.5056	0	100	185	10	94.5946	0	100	170	97.1429	102.941						84.435
	1 nup50-Cas9/nup50-Cas9♂ X 10 wt♀	546	480	87.9121	421	87.7083	♂Cas9/+	219	16	92.6941	0	100	233	15	93.5622	0	100	211	96.789	107.389						87.9121
	1 nup50-Cas9/nup50-Cas9♂ X 10 wt♀	584	521	89.2123	424	81.382	♂Cas9/+	232	15	93.5345	0	100	224	17	92.4107	0	100	202	97.5845	95.3917						89.2123
	1 gRNA[Mhc]#1/+♂ X 10 wt♀	574	533	92.8571	469	87.9925	gRNA[Mhc]#1♂/+	120	5	95.8333	0	100	122	2	98.3607	0	100	120	100	104.348
	1 gRNA[Mhc]#1/+♂ X 10 wt♀	468	440	94.0171	380	86.3636	gRNA[Mhc]#1♂/+	93	4	95.6989	0	100	98	4	95.9184	0	100	93	98.9362	105.618
	1 gRNA[Mhc]#1/+♂ X 10 wt♀	369	346	93.7669	302	87.2832	gRNA[Mhc]#1♂/+	85	3	96.4706	0	100	83	3	96.3855	0	100	78	97.5	97.561
							gRNA[Mhc]#1♂. +/+	116	3	97.4138	0	100	128	7	94.5312	0	100	120	99.1736	107.08
							gRNA[Mhc]#1♂. +/+	95	2	97.8947	0	100	109	5	95.4128	0	100	104	100	111.828
							gRNA[Mhc]#1♂. +/+	76	3	96.0526	0	100	71	4	94.3662	0	100	67	100	91.7808
	1 wt♂ X 10 gRNA[Mhc]#1/+♀	498	452	90.7631	411	90.9292	gRNA[Mhc]#1♀/+	101	4	96.0396	0	100	113	5	95.5752	0	100	105	97.2222	111.34
	1 wt♂ X 10 gRNA[Mhc]#1/+♀	460	415	90.2174	387	93.253	gRNA[Mhc]#1♀/+	101	4	96.0396	0	100	113	5	95.5752	0	100	105	97.2222	111.34
	1 wt♂ X 10 gRNA[Mhc]#1/+♀	537	516	96.0894	462	89.5349	gRNA[Mhc]#1♀/+	124	5	95.9677	0	100	116	4	96.5517	0	100	111	99.1071	94.1176
							gRNA[Mhc]#1♀. +/+	98	4	95.9184	0	100	116	4	96.5517	0	100	108	96.4286	119.149
							gRNA[Mhc]#1♀. +/+	98	3	96.9388	0	100	90	3	96.6667	0	100	87	100	91.5789
							gRNA[Mhc]#1♀. +/+	122	5	95.9016	0	100	119	5	95.7983	0	100	112	98.2456	97.4359
	1 gRNA[Mhc]#1/+♂ X 10 nup50-Cas9/nup50-Cas9♀	565	471	83.3628	423	89.8089	gRNA[Mhc]#1♂/+;Cas9♀/+	115	3	97.3913	0	100	124	5	95.9677	119	0	24	20.1681	106.25	552	0	0	5561	5238	94.1917
	1 gRNA[Mhc]#1/+♂ X 10 nup50-Cas9/nup50-Cas9♀	544	460	84.5588	399	86.7391	gRNA[Mhc]#1♂/+;Cas9♀/+	115	3	97.3913	0	100	102	2	98.0392	100	0	34	34	89.2857	352	0	0	4748	4341	91.428
	1 gRNA[Mhc]#1/+♂ X 10 nup50-Cas9/nup50-Cas9♀	408	346	84.8039	300	86.7052	gRNA[Mhc]#1♂/+;Cas9♀/+	83	4	95.1807	0	100	68	2	97.0588	66	0	15	22.7273	83.5443	157	0	0	4214	3826	90.7926
							gRNA[Mhc]#1♂. +/+;Cas9♀/+	107	4	96.2617	0	100	92	3	96.7391	0	100	89	100	86.4078
							gRNA[Mhc]#1♂. +/+;Cas9♀/+	88	4	95.4545	0	100	106	3	97.1698	0	100	101	98.0583	122.619
							gRNA[Mhc]#1♂. +/+;Cas9♀/+	82	2	97.561	0	100	77	2	97.4026	0	100	75	100	93.75
	1 nup50-Cas9/nup50-Cas9♂ X 10 gRNA[Mhc]#1/+♀	566	505	89.2226	426	84.3564	gRNA[Mhc]#1♀/+;Cas9♂/+	108	1	99.0741	0	100	115	5	95.6522	110	0	26	23.6364	102.804	521	0	0	4037	3831	94.8972
	1 nup50-Cas9/nup50-Cas9♂ X 10 gRNA[Mhc]#1/+♀	497	445	89.5372	396	88.9888	gRNA[Mhc]#1♀/+;Cas9♂/+	114	3	97.3684	0	100	110	3	97.2727	107	0	25	23.3645	96.3964	409	0	0	5419	5012	92.4894
	1 nup50-Cas9/nup50-Cas9♂ X 10 gRNA[Mhc]#1/+♀	590	503	85.2542	420	83.499	gRNA[Mhc]#1♀/+;Cas9♂/+	113	3	97.3451	0	100	115	5	95.6522	110	0	42	38.1818	100	913	0	0	5086	4669	91.801
							gRNA[Mhc]#1♀. +/+;Cas9♂/+	115	4	96.5217	0	100	101	3	97.0297	0	100	96	97.9592	88.2883
							gRNA[Mhc]#1♀. +/+;Cas9♂/+	84	5	94.0476	0	100	103	4	96.1165	0	100	99	100	125.316
							gRNA[Mhc]#1♀. +/+;Cas9♂/+	109	4	96.3303	0	100	98	3	96.9388	0	100	94	98.9474	90.4762
	1 gRNA[Mhc]#2/+♂ X 10 wt♀	514	472	91.8288	402	85.1695	gRNA[Mhc]#2♂/+	104	4	96.1538	0	100	113	2	98.2301	0	100	111	100	111
	1 gRNA[Mhc]#2/+♂ X 10 wt♀	493	451	91.4807	405	89.8004	gRNA[Mhc]#2♂/+	112	5	95.5357	0	100	104	6	94.2308	0	100	96	97.9592	91.5888
	1 gRNA[Mhc]#2/+♂ X 10 wt♀	462	424	91.7749	357	84.1981	gRNA[Mhc]#2♂/+	103	4	96.1165	0	100	91	4	95.6044	0	100	87	100	87.8788
							gRNA[Mhc]#2♂. +/+	93	0	100	0	100	101	3	97.0297	0	100	97	98.9796	105.376
							gRNA[Mhc]#2♂. +/+	105	5	95.2381	0	100	106	6	94.3396	0	100	97	97	100
							gRNA[Mhc]#2♂. +/+	82	3	96.3415	0	100	95	3	96.8421	0	100	91	98.913	116.456
	1 wt♂ X 10 gRNA[Mhc]#2/+♀	445	414	93.0337	346	83.5749	gRNA[Mhc]#2♀/+	96	3	96.875	0	100	92	4	95.6522	0	100	86	97.7273	94.6237
	1 wt♂ X 10 gRNA[Mhc]#2/+♀	361	328	90.8587	309	94.2073	gRNA[Mhc]#2♀/+	86	3	96.5116	0	100	82	4	95.122	0	100	76	97.4359	93.9759
	1 wt♂ X 10 gRNA[Mhc]#2/+♀	428	399	93.2243	356	89.2231	gRNA[Mhc]#2♀/+	86	3	96.5116	0	100	93	4	95.6989	0	100	89	100	107.229
							gRNA[Mhc]#2♀. +/+	87	3	96.5517	0	100	84	3	96.4286	0	100	81	100	96.4286
							gRNA[Mhc]#2♀. +/+	68	3	95.5882	0	100	87	4	95.4023	0	100	81	97.5904	127.692
							gRNA[Mhc]#2♀. +/+	98	5	94.898	0	100	94	3	96.8085	0	100	90	98.9011	97.8495
	1 gRNA[Mhc]#2/+♂ X 10 nup50-Cas9/nup50-Cas9♀	672	547	81.3988	500	91.4077	gRNA[Mhc]#2♂/+;Cas9♀/+	122	2	98.3607	0	100	113	4	96.4602	0	100	109	100	90.8333	12157	11835	97.3513	4777	4517	94.5573
	1 gRNA[Mhc]#2/+♂ X 10 nup50-Cas9/nup50-Cas9♀	423	352	83.2151	312	88.6364	gRNA[Mhc]#2♂/+;Cas9♀/+	70	3	95.7143	0	100	73	4	94.5205	0	100	67	97.1014	102.985	6083	5880	96.6628	3895	3606	92.5802
	1 gRNA[Mhc]#2/+♂ X 10 nup50-Cas9/nup50-Cas9♀	527	469	88.9943	420	89.5522	gRNA[Mhc]#2♂/+;Cas9♀/+	121	3	97.5207	0	100	94	6	93.617	0	100	87	98.8636	74.5763	9452	9192	97.2493	5551	5154	92.8481
							gRNA[Mhc]#2♂. +/+;Cas9♀/+	135	7	94.8148	0	100	145	2	98.6207	0	100	140	97.9021	111.719
							gRNA[Mhc]#2♂. +/+;Cas9♀/+	93	2	97.8495	0	100	88	3	96.5909	0	100	84	98.8235	93.4066
							gRNA[Mhc]#2♂. +/+;Cas9♀/+	107	4	96.2617	0	100	116	5	95.6897	0	100	106	95.4955	107.767
	1 nup50-Cas9/nup50-Cas9♂ X 10 gRNA[Mhc]#2/+♀	535	460	85.9813	400	86.9565	gRNA[Mhc]#2♀/+;Cas9♂/+	105	3	97.1429	0	100	95	2	97.8947	0	100	91	97.8495	91.1765	9474	9177	96.8651	4561	4263	93.4663
	1 nup50-Cas9/nup50-Cas9♂ X 10 gRNA[Mhc]#2/+♀	587	510	86.8825	460	90.1961	gRNA[Mhc]#2♀/+;Cas9♂/+	119	5	95.7983	0	100	125	8	93.6	0	100	112	95.7265	102.632	9522	9183	96.4398	4336	3924	90.4982
	1 nup50-Cas9/nup50-Cas9♂ X 10 gRNA[Mhc]#2/+♀	516	458	88.7597	409	89.3013	gRNA[Mhc]#2♀/+;Cas9♂/+	91	5	94.5055	0	100	99	4	95.9596	0	100	95	100	110.465	10589	10174	96.0808	5497	5056	91.9774
							gRNA[Mhc]#2♀. +/+;Cas9♂/+	89	2	97.7528	0	100	122	4	96.7213	0	100	116	98.3051	135.632
							gRNA[Mhc]#2♀. +/+;Cas9♂/+	121	3	97.5207	0	100	116	5	95.6897	0	100	107	96.3964	94.0678
							gRNA[Mhc]#2♀. +/+;Cas9♂/+	115	4	96.5217	0	100	122	5	95.9016	0	100	116	99.1453	105.405
	1 gRNA[Mhc]#3/+♂ X 10 wt♀	525	479	91.2381	408	85.1775	gRNA[Mhc]#3♂/+	93	4	95.6989	0	100	102	3	97.0588	0	100	97	97.9798	111.236
	1 gRNA[Mhc]#3/+♂ X 10 wt♀	409	368	89.9756	325	88.3152	gRNA[Mhc]#3♂/+	87	4	95.4023	0	100	92	2	97.8261	0	100	90	100	108.434
	1 gRNA[Mhc]#3/+♂ X 10 wt♀	529	498	94.1399	446	89.5582	gRNA[Mhc]#3♂/+	120	3	97.5	0	100	97	3	96.9072	0	100	90	95.7447	80.3419
							gRNA[Mhc]#3♂. +/+	112	3	97.3214	0	100	115	4	96.5217	0	100	111	100	101.835
							gRNA[Mhc]#3♂. +/+	80	3	96.25	0	100	78	3	96.1538	0	100	75	100	97.4026
							gRNA[Mhc]#3♂. +/+	127	7	94.4882	0	100	118	3	97.4576	0	100	114	99.1304	95.8333
	1 wt♂ X 10 gRNA[Mhc]#3/+♀	392	366	93.3673	299	81.694	gRNA[Mhc]#3♀/+	73	4	94.5205	0	100	72	5	93.0556	0	100	66	98.5075	97.1014
	1 wt♂ X 10 gRNA[Mhc]#3/+♀	415	384	92.5301	318	82.8125	gRNA[Mhc]#3♀/+	73	4	94.5205	0	100	72	5	93.0556	0	100	66	98.5075	97.1014
	1 wt♂ X 10 gRNA[Mhc]#3/+♀	486	453	93.2099	403	88.9625	gRNA[Mhc]#3♀/+	98	3	96.9388	0	100	111	6	94.5946	0	100	101	96.1905	110.526
							gRNA[Mhc]#3♀. +/+	83	4	95.1807	0	100	89	5	94.382	0	100	84	100	106.329
							gRNA[Mhc]#3♀. +/+	95	3	96.8421	0	100	93	3	96.7742	0	100	84	93.3333	97.8261
							gRNA[Mhc]#3♀. +/+	95	3	96.8421	0	100	114	3	97.3684	0	100	111	100	120.652
	1 gRNA[Mhc]#3/+♂ X 10 nup50-Cas9/nup50-Cas9♀	584	503	86.1301	434	86.2823	gRNA[Mhc]#3♂/+;Cas9♀/+	128	3	97.6562	0	100	119	5	95.7983	0	100	111	97.3684	91.2	10762	10224	95.0009	5272	4914	93.2094
	1 gRNA[Mhc]#3/+♂ X 10 nup50-Cas9/nup50-Cas9♀	538	455	84.5725	386	84.8352	gRNA[Mhc]#3♂/+;Cas9♀/+	106	2	98.1132	0	100	90	6	93.3333	0	100	82	97.619	80.7692	8237	7976	96.8314	4405	4135	93.8706
	1 gRNA[Mhc]#3/+♂ X 10 nup50-Cas9/nup50-Cas9♀	510	438	85.8824	383	87.4429	gRNA[Mhc]#3♂/+;Cas9♀/+	101	3	97.0297	0	100	117	3	97.4359	0	100	101	88.5965	116.327	11379	11001	96.6781	4664	4447	95.3473
							gRNA[Mhc]#3♂. +/+;Cas9♀/+	108	4	96.2963	0	100	97	6	93.8144	0	100	89	97.8022	87.5
							gRNA[Mhc]#3♂. +/+;Cas9♀/+	102	4	96.0784	0	100	104	4	96.1538	0	100	95	95	102.041
							gRNA[Mhc]#3♂. +/+;Cas9♀/+	85	3	96.4706	0	100	93	4	95.6989	0	100	87	97.7528	108.537
	1 nup50-Cas9/nup50-Css9♂ X 10 gRNA[Mhc]#3/+♀	622	553	88.9068	475	85.8951	gRNA[Mhc]#3♀/+;Cas9♂/+	127	3	97.6378	0	100	120	4	96.6667	0	100	116	100	93.5484	10152	9876	97.2813	3880	3616	93.1959
	1 nup50-Cas9/nup50-Css9♂ X 10 gRNA[Mhc]#3/+♀	599	518	86.4775	438	84.556	gRNA[Mhc]#3♀/+;Cas9♂/+	98	6	93.8776	0	100	132	7	94.697	0	100	120	96	135.87	9077	8575	94.4695	5899	5228	88.6252
	1 nup50-Cas9/nup50-Css9♂ X 10 gRNA[Mhc]#3/+♀	483	421	87.1636	390	92.6366	gRNA[Mhc]#3♀/+;Cas9♂/+	105	3	97.1429	0	100	87	3	96.5517	0	100	82	97.619	82.3529	7746	7512	96.9791	5282	4728	89.5115
							gRNA[Mhc]#3♀. +/+;Cas9♂/+	137	6	95.6204	0	100	108	4	96.2963	0	100	101	97.1154	79.3893
							gRNA[Mhc]#3♀. +/+;Cas9♂/+	105	4	96.1905	0	100	127	7	94.4882	0	100	115	95.8333	118.812
							gRNA[Mhc]#3♀. +/+;Cas9♂/+	98	6	93.8776	0	100	115	3	97.3913	0	100	110	98.2143	121.739
	1 gRNA[Mhc]#4/+♂ X 10 wt♀	603	535	88.7231	463	86.5421	gRNA[Mhc]#4♂/+	123	5	95.935	0	100	109	6	94.4954	0	100	102	99.0291	87.2881
	1 gRNA[Mhc]#4/+♂ X 10 wt♀	517	469	90.7157	434	92.5373	gRNA[Mhc]#4♂/+	110	7	93.6364	0	100	114	5	95.614	0	100	106	97.2477	105.825
	1 gRNA[Mhc]#4/+♂ X 10 wt♀	584	557	95.3767	484	86.8941	gRNA[Mhc]#4♂/+	124	5	95.9677	0	100	133	7	94.7368	0	100	123	97.619	105.882
							gRNA[Mhc]#4♂. +/+	127	2	98.4252	0	100	119	2	98.3193	0	100	115	98.2906	93.6
							gRNA[Mhc]#4♂. +/+	121	5	95.8678	0	100	112	6	94.6429	0	100	105	99.0566	91.3793
							gRNA[Mhc]#4♂. +/+	122	7	94.2623	0	100	129	5	96.124	0	100	120	96.7742	107.826
	1 wt♂ X 10 gRNA[Mhc]#4/+♀	484	438	90.4959	404	92.2374	gRNA[Mhc]#4♀/+	98	6	93.8776	0	100	115	4	96.5217	0	100	108	97.2973	120.652
	1 wt♂ X 10 gRNA[Mhc]#4/+♀	518	489	94.4015	414	84.6626	gRNA[Mhc]#4♀/+	98	6	93.8776	0	100	115	4	96.5217	0	100	108	97.2973	120.652
	1 wt♂ X 10 gRNA[Mhc]#4/+♀	466	415	89.0558	364	87.7108	gRNA[Mhc]#4♀/+	93	4	95.6989	0	100	97	3	96.9072	0	100	93	98.9362	105.618
							gRNA[Mhc]#4♀. +/+	107	5	95.3271	0	100	103	4	96.1165	0	100	98	98.9899	97.0588
							gRNA[Mhc]#4♀. +/+	105	4	96.1905	0	100	116	6	94.8276	0	100	107	97.2727	108.911
							gRNA[Mhc]#4♀. +/+	99	3	96.9697	0	100	89	4	95.5056	0	100	84	98.8235	88.5417
	1 gRNA[Mhc]#4/+♂ X 10 nup50-Cas9/nup50-Cas9♀	582	488	83.8488	415	85.041	gRNA[Mhc]#4♂/+;Cas9♀/+	98	4	95.9184	0	100	105	3	97.1429	102	0	32	31.3725	108.511	792	0	0	4243	3973	93.6366
	1 gRNA[Mhc]#4/+♂ X 10 nup50-Cas9/nup50-Cas9♀	435	379	87.1264	338	89.1821	gRNA[Mhc]#4♂/+;Cas9♀/+	98	4	95.9184	0	100	101	4	96.0396	97	0	21	21.6495	103.191	344	0	0	4375	4071	93.0514
	1 gRNA[Mhc]#4/+♂ X 10 nup50-Cas9/nup50-Cas9♀	574	483	84.1463	442	91.5114	gRNA[Mhc]#4♂/+;Cas9♀/+	129	6	95.3488	0	100	103	5	95.1456	98	0	40	40.8163	79.6748	771	0	0	4841	4630	95.6414
							gRNA[Mhc]#4♂. +/+;Cas9♀/+	111	5	95.4955	0	100	117	4	96.5812	0	100	111	98.2301	106.604
							gRNA[Mhc]#4♂. +/+;Cas9♀/+	86	2	97.6744	0	100	65	2	96.9231	0	100	61	96.8254	75
							gRNA[Mhc]#4♂. +/+;Cas9♀/+	126	5	96.0317	0	100	104	4	96.1538	0	100	92	92	82.6446
	1 nup50-Cas9/nup50-Cas9♂ X 10 gRNA[Mhc]#4/+♀	478	405	84.728	364	89.8765	gRNA[Mhc]#4♀/+;Cas9♂/+	81	3	96.2963	0	100	92	3	96.7391	89	0	15	16.8539	114.103	336	0	0	3959	3792	95.7818
	1 nup50-Cas9/nup50-Cas9♂ X 10 gRNA[Mhc]#4/+♀	568	461	81.162	429	93.0586	gRNA[Mhc]#4♀/+;Cas9♂/+	110	4	96.3636	0	100	106	2	98.1132	104	0	34	32.6923	98.1132	618	0	0	3890	3719	95.6041
	1 nup50-Cas9/nup50-Cas9♂ X 10 gRNA[Mhc]#4/+♀	477	402	84.2767	361	89.801	gRNA[Mhc]#4♀/+;Cas9♂/+	86	2	97.6744	0	100	95	6	93.6842	89	0	30	33.7079	105.952	753	0	0	4885	4439	90.87
							gRNA[Mhc]#4♀. +/+;Cas9♂/+	106	2	98.1132	0	100	96	3	96.875	0	100	90	96.7742	89.4231
							gRNA[Mhc]#4♀. +/+;Cas9♂/+	113	3	97.3451	0	100	114	5	95.614	0	100	106	97.2477	99.0909
							gRNA[Mhc]#4♀. +/+;Cas9♂/+	87	2	97.7011	0	100	107	4	96.2617	0	100	101	98.0583	121.176
	1 gRNA[Mhc]#5/+♂ X 10 wt♀	634	571	90.0631	516	90.3678	gRNA[Mhc]#5♂/+	131	3	97.7099	0	100	127	5	96.063	0	100	116	95.082	95.3125
	1 gRNA[Mhc]#5/+♂ X 10 wt♀	552	524	94.9275	461	87.9771	gRNA[Mhc]#5♂/+	123	5	95.935	0	100	115	4	96.5217	0	100	107	96.3964	94.0678
	1 gRNA[Mhc]#5/+♂ X 10 wt♀	418	376	89.9522	341	90.6915	gRNA[Mhc]#5♂/+	84	3	96.4286	0	100	92	4	95.6522	0	100	87	98.8636	108.642
							gRNA[Mhc]#5♂. +/+	145	7	95.1724	0	100	133	5	96.2406	0	100	124	96.875	92.7536
							gRNA[Mhc]#5♂. +/+	119	5	95.7983	0	100	122	4	96.7213	0	100	117	99.1525	103.509
							gRNA[Mhc]#5♂. +/+	99	4	95.9596	0	100	80	3	96.25	0	100	76	98.7013	81.0526
	1 wt♂ X 10 gRNA[Mhc]#5/+♀	548	502	91.6058	409	81.4741	gRNA[Mhc]#5♀/+	116	5	95.6897	0	100	98	6	93.8776	0	100	92	100	82.8829
	1 wt♂ X 10 gRNA[Mhc]#5/+♀	496	462	93.1452	412	89.1775	gRNA[Mhc]#5♀/+	116	5	95.6897	0	100	98	6	93.8776	0	100	92	100	82.8829
	1 wt♂ X 10 gRNA[Mhc]#5/+♀	425	388	91.2941	337	86.8557	gRNA[Mhc]#5♀/+	92	3	96.7391	0	100	84	3	96.4286	0	100	80	98.7654	91.0112
							gRNA[Mhc]#5♀. +/+	106	6	94.3396	0	100	114	8	92.9825	0	100	103	97.1698	106
							gRNA[Mhc]#5♀. +/+	112	4	96.4286	0	100	105	4	96.1905	0	100	98	97.0297	93.5185
							gRNA[Mhc]#5♀. +/+	95	5	94.7368	0	100	80	3	96.25	0	100	74	96.1039	85.5556
	1 gRNA[Mhc]#5/+♂ X 10 nup50-Cas9/nup50-Cas9♀	508	401	78.937	356	88.7781	gRNA[Mhc]#5♂/+;Cas9♀/+	101	5	95.0495	0	100	99	3	96.9697	96	0	17	17.7083	100	373	0	0	4527	4140	91.4513
	1 gRNA[Mhc]#5/+♂ X 10 nup50-Cas9/nup50-Cas9♀	498	448	89.9598	374	83.4821	gRNA[Mhc]#5♂/+;Cas9♀/+	101	5	95.0495	0	100	86	3	96.5116	83	0	13	15.6627	86.4583	211	0	0	4641	4214	90.7994
	1 gRNA[Mhc]#5/+♂ X 10 nup50-Cas9/nup50-Cas9♀	506	422	83.3992	358	84.8341	gRNA[Mhc]#5♂/+;Cas9♀/+	95	4	95.7895	0	100	88	4	95.4545	84	0	27	32.1429	92.3077	404	0	0	4434	4131	93.1664
							gRNA[Mhc]#5♂. +/+;Cas9♀/+	89	4	95.5056	0	100	81	2	97.5309	0	100	75	94.9367	92.9412						#DIV/0!
							gRNA[Mhc]#5♂. +/+;Cas9♀/+	95	3	96.8421	0	100	106	3	97.1698	0	100	98	95.1456	111.957
							gRNA[Mhc]#5♂. +/+;Cas9♀/+	98	3	96.9388	0	100	92	4	95.6522	0	100	86	97.7273	92.6316
	1 nup50-Cas9/nup50-Cas9♂ X 10 gRNA[Mhc]#5/+♀	469	401	85.5011	363	90.5237	gRNA[Mhc]#5♀/+;Cas9♂/+	92	1	98.913	0	100	106	3	97.1698	103	0	19	18.4466	113.187	265	0	0	4586	4375	95.399
	1 nup50-Cas9/nup50-Cas9♂ X 10 gRNA[Mhc]#5/+♀	686	585	85.277	509	87.0085	gRNA[Mhc]#5♀/+;Cas9♂/+	129	4	96.8992	0	100	141	5	96.4539	136	0	28	20.5882	108.8	315	0	0	4934	4419	89.5622
	1 nup50-Cas9/nup50-Cas9♂ X 10 gRNA[Mhc]#5/+♀	472	411	87.0763	349	84.9148	gRNA[Mhc]#5♀/+;Cas9♂/+	89	4	95.5056	0	100	91	5	94.5055	86	0	22	25.5814	101.176	510	0	0	4615	4356	94.3879
							gRNA[Mhc]#5♀. +/+;Cas9♂/+	93	1	98.9247	0	100	79	2	97.4684	0	100	77	100	83.6957
							gRNA[Mhc]#5♀. +/+;Cas9♂/+	130	4	96.9231	0	100	125	3	97.6	0	100	117	95.9016	96.8254
							gRNA[Mhc]#5♀. +/+;Cas9♂/+	91	5	94.5055	0	100	96	4	95.8333	0	100	86	93.4783	106.977

## Sheet: SIngle gene disruption statisti
♀ fertility				♂ fertility
two-sided t-test				two-sided t-test
All comparisons	t statistic	2.08596		All comparisons	t statistic	2.08596
	df	49			df	49
	P value	<0.0001			P value	<0.0001
	Significant	Yes			Significant	Yes
wt vs Cas9/Cas9	t statistic	10.998		wt vs Cas9/Cas9	t statistic	5.61788
	df	49			df	49
	mean [wt]	96.952			mean [wt]	97.082
	mean [Cas9/Cas9]	83.358			mean [Cas9/Cas9]	88.972
	P value	<0.0001			P value	<0.0001
	Significant	Yes			Significant	Yes
wt vs Btub/+	t statistic	2.82773		wt vs Btub/+	t statistic	1.00768
	df	49			df	49
	mean [wt]	96.952			mean [wt]	96.952
	mean [Btub/+]	91.1267			mean [Btub/+]	93.1967
	P value	0.0006			P value	0.0107
	Significant	Yes			Significant	Yes
wt vs myo-fem/+	t statistic	1.59773		wt vs myo-fem/+	t statistic	0.654343
	df	49			df	49
	mean [wt]	96.952			mean [wt]	97.082
	mean [myo-fem/+]	92.3567			mean [myo-fem/+]	93.55
	P value	0.0045			P value	0.0187
	Significant	Yes			Significant	Yes
wt vs Btub♀/Cas9♂	t statistic	2.78106		wt vs Btub♀/Cas9♂	t statistic	94.3043
	df	49			df	49
	mean [wt]	96.952			mean [wt]	97.082
	mean [Btub♀/Cas9♂]	91.1733			mean [Btub♀/Cas9♂]	0
	P value	0.0007			P value	<0.0001
	Significant	Yes			Significant	Yes
wt vs myo-fem♀/Cas9♂	t statistic	93.9544		wt vs myo-fem♀/Cas9♂	t statistic	1.14101
	df	49			df	49
	mean [wt]	96.952			mean [wt]	97.082
	mean [myo-fem♀/Cas9♂]	0			mean [myo-fem♀/Cas9♂]	93.0633
	P value	<0.0001			P value	0.0086
	Significant	Yes			Significant	Yes
wt vs BTub♂/Cas9♀	t statistic	4.1844		wt vs BTub♂/Cas9♀	t statistic	94.3043
	df	49			df	49
	mean [wt]	96.952			mean [wt]	97.082
	mean [Btub♂/Cas9♀]	89.77			mean [Btub♂/Cas9♀]	0
	P value	<0.0001			P value	<0.0001
	Significant	Yes			Significant	Yes
wt vs myo-fem♂/Cas9♀	t statistic	93.544		wt vs myo-fem♂/Cas9♀	t statistic	2.06768
	df	49			df	49
	mean [wt]	96.952			mean [wt]	97.082
	mean [myo-fem♂/Cas9♀]	0			mean [myo-fem♂/Cas9♀]	92.1367
	P value	<0.0001			P value	0.0019
	Significant	Yes			Significant	Yes
