# Supplementary material for: Eliminating Mosquitoes with Precision Guided Sterile Males
Source: Research Square preprint supplement (doi:10.21203/rs.3.rs-367110/v1), 2021-04-05
Supplement: Supplementary file 12 [file Table S4 - Double gene disruption_ pgSIT cross data.xlsx]

## Sheet: gRNAβTub+gRNAmyo-fem=1067A1+106
	Table S4 - Double gene disruption, pgSIT cross data
	gRNA[βTub]+gRNA[myo-fem] = 1067A1+1067K
	Test Group	Egg #	Hatched egg #	Hatching %	Adult #	larva-to-adult survival %	larval death %	F1 progeny	egg-to-adult survival (%)	♂ Pupae #	♂ Pupal death #	♂ Pupa- adult survival %	Flightless ♂ #	Flight ♂ %	♀ Pupa #	♀ Pupal death #	♀ Pupa- adult survival %	♀ Flightless #	♀ Flight %	Blood taking ♀#	♀ Blood taking %	♀/(♀+♂) emerged adults %	Eggs by (wt / Cas9 / gRNA / F1 ♀ X wt ♂)	Hatched eggs by (wt / Cas9 / gRNA / F1 ♀ X wt ♂)	wt / Cas9 / gRNA / F1 ♀ fertility %	Eggs by (wt ♀ X wt / Cas9 / gRNA / F1 ♂)	Hatch eggs by (wt ♀ X wt / Cas9 / gRNA / F1 ♂	wt / Cas9 / gRNA / F1 ♂ fertility %
	1 wt♂ X 10 wt♀	595	576	96.8067	499	86.6319	0.100694	wt	83.8655	267	12	95.5056	0	100	251	7	97.2112	0	100	240	0.983607	48.9			96.8067			96.8067
	1 wt♂ X 10 wt♀	602	587	97.5083	517	88.075	0.0851789	wt	85.8804	255	7	97.2549	0	100	282	13	95.3901	0	100	265	0.98513	52.03			97.5083			97.5083
	1 wt♂ X 10 wt♀	557	539	96.7684	451	83.6735	0.133581	wt	80.9695	238	11	95.3782	0	100	229	5	97.8166	0	100	220	0.982143	49.67			96.7684			96.7684
	1 wt♂ X 10 wt♀	539	523	97.0315	490	93.6902	0.0305927	wt	90.9091	243	9	96.2963	0	100	264	8	96.9697	0	100	251	0.980469	52.24			97.0315			97.0315
	1 wt♂ X 10 wt♀	540	514	95.1852	454	88.3268	0.0719844	wt	84.0741	232	10	95.6897	0	100	245	13	94.6939	0	100	232	1	51.1			97.2924			97.2924
	50 nup50-Cas9/nup50-Cas9♂ X 50 wt♀	4948	4399	88.9046	3789	86.1332	0.0436463	Cas9♂/+	76.5764	2015	106	94.7395	0	100	1983	103	94.8058	0	100	1814	0.964894	49.62	4178	3758	89.9473	3869	3443	88.9894
	50 nup50-Cas9/nup50-Cas9♂ X 50 wt♀	4293	3938	91.7307	3294	83.6465	0.0817674	Cas9♂/+	76.7296	1686	76	95.4923	0	100	1769	85	95.195	0	100	1578	0.937055	51.12	4025	3652	90.7329	4467	4085	91.4484
	50 nup50-Cas9/nup50-Cas9♂ X 50 wt♀	4382	3789	86.4674	3276	86.4608	0.0493534	Cas9♂/+	74.7604	1704	93	94.5423	0	100	1735	70	95.9654	0	100	1621	0.973574	50.82	4521	4009	88.6751	4972	4514	90.7884
	50 wt♂ X 50 nup50-Cas9/nup50-Cas9♀	3815	2996	78.5321	2584	86.2483	0.0447263	Cas9♀/+	67.7326	1401	58	95.8601	0	100	1322	81	93.8729	0	100	1105	0.890411	48.03	4624	4058	87.7595	5257	4769	90.7171
	50 wt♂ X 50 nup50-Cas9/nup50-Cas9♀	3772	3165	83.9077	2693	85.0869	0.0296998	Cas9♀/+	71.3945	1479	84	94.3205	0	100	1403	105	92.516	0	100	1272	0.979969	48.2	4477	3983	88.9658	4982	4326	86.8326
	50 wt♂ X 50 nup50-Cas9/nup50-Cas9♀	4213	3591	85.2362	3128	87.1067	0.037594	Cas9♀/+	74.2464	1569	96	93.8815	0	100	1723	68	96.0534	0	100	1597	0.964955	52.91	5026	4550	90.5292	4347	3891	89.51
	50 gRNA[βTub]#7,gRNA[myo-fem]#1♂ X 50 wt♀	5487	4824	87.9169	4207	87.2098	0.0420813	gRNA[βTub]♂/+;gRNA[myo-fem]♂/+	76.6721	2301	94	95.9148	0	100	2113	113	94.6522	0	100	1933	0.9665	47.54	4232	3879	91.6588	4873	4522	92.797
	50 gRNA[βTub]#7,gRNA[myo-fem]#1♂ X 50 wt♀	5550	5112	92.1081	4530	88.615	0.0410798	gRNA[βTub]♂/+;gRNA[myo-fem]♂/+	81.6216	2237	81	96.3791	0	100	2479	105	95.7644	0	100	2194	0.924179	52.41	4143	3566	86.0729	5325	4665	87.6056
	50 gRNA[βTub]#7,gRNA[myo-fem]#1♂ X 50 wt♀	5171	4678	90.4661	4070	87.003	0.0483112	gRNA[βTub]♂/+;gRNA[myo-fem]♂/+	78.7082	2156	90	95.8256	0	100	2105	101	95.2019	0	100	1899	0.947605	49.24	4876	4414	90.525	5138	4671	90.9109
	50 wt♂ X 50 gRNA[βTub]#7,gRNA[myo-fem]#1♀	4437	3818	86.0491	3340	87.4804	0.0225249	gRNA[βTub]♀/+;gRNA[myo-fem]♀/+	75.2761	1811	108	94.0364	0	100	1725	88	94.8986	0	100	1573	0.960904	49.01	5248	4753	90.5678	4006	3679	91.8372
	50 wt♂ X 50 gRNA[βTub]#7,gRNA[myo-fem]#1♀	4216	3659	86.7884	3129	85.5152	0.0295163	gRNA[βTub]♀/+;gRNA[myo-fem]♀/+	74.2173	1757	99	94.3654	0	100	1583	112	92.9248	0	100	1395	0.948334	47.01	4617	4145	89.7769	5152	4633	89.9262
	50 wt♂ X 50 gRNA[βTub]#7,gRNA[myo-fem]#1♀	4409	3802	86.2327	3222	84.7449	0.0120989	gRNA[βTub]♀/+;gRNA[myo-fem]♀/+	73.0778	1739	122	92.9845	0	100	1750	145	91.7143	0	100	1537	0.957632	49.81	4285	3684	85.9743	4573	4026	88.0385
	50 nup50-Cas9/nup50-Cas9♂ X 50 gRNA[βTub]#7,gRNA[myo-fem]#1♀	3087	2621	84.9044	2022	77.1461	0.0988172	Cas9♂/+;gRNA[βTub]♀/+;gRNA[myo-fem]♀/+	65.5005	1143	75	93.4383	0	100	1049	95	90.9438	954	0	203	0.212788	47.18	1571	44	2.80076	18571	2	0.0107695
	50 nup50-Cas9/nup50-Cas9♂ X 50 gRNA[βTub]#7,gRNA[myo-fem]#1♀	4103	3305	80.5508	2438	73.767	0.159455	Cas9♂/+;gRNA[βTub]♀/+;gRNA[myo-fem]♀/+	59.4199	1268	106	91.6404	0	100	1340	64	95.2239	1276	0	425	0.333072	52.34	2106	0	0	16829	0	0
	50 nup50-Cas9/nup50-Cas9♂ X 50 gRNA[βTub]#7,gRNA[myo-fem]#1♀	3769	3153	83.6561	2597	82.366	0.0964161	Cas9♂/+;gRNA[βTub]♀/+;gRNA[myo-fem]♀/+	68.9042	1312	57	95.6555	0	100	1411	69	95.1099	1342	0	179	0.133383	51.68	1340	0	0	15349	0	0
	50 Cas9♂/+;gRNA[βTub]♀/+;gRNA[myo-fem]♀/+ ♂ X 50 wt ♀							Cas9♂/+;gRNA[βTub]♀/+;gRNA[myo-fem]♀/+																		16497	0	0
	50 Cas9♂/+;gRNA[βTub]♀/+;gRNA[myo-fem]♀/+ ♂ X 50 wt ♀							Cas9♂/+;gRNA[βTub]♀/+;gRNA[myo-fem]♀/+																		15234	134	0.879611
	50 Cas9♂/+;gRNA[βTub]♀/+;gRNA[myo-fem]♀/+ ♂ X 50 wt ♀							Cas9♂/+;gRNA[βTub]♀/+;gRNA[myo-fem]♀/+																		15113	0	0
	50 Cas9♂/+;gRNA[βTub]♀/+;gRNA[myo-fem]♀/+ ♂ X 50 wt ♀							Cas9♂/+;gRNA[βTub]♀/+;gRNA[myo-fem]♀/+																		16966	5	0.0294707
	50 Cas9♂/+;gRNA[βTub]♀/+;gRNA[myo-fem]♀/+ ♂ X 50 wt ♀							Cas9♂/+;gRNA[βTub]♀/+;gRNA[myo-fem]♀/+																		14909	0	0
	50 Cas9♂/+;gRNA[βTub]♀/+;gRNA[myo-fem]♀/+ ♂ X 50 wt ♀							Cas9♂/+;gRNA[βTub]♀/+;gRNA[myo-fem]♀/+																		13311	0	0
	50 Cas9♂/+;gRNA[βTub]♀/+;gRNA[myo-fem]♀/+ ♂ X 50 wt ♀							Cas9♂/+;gRNA[βTub]♀/+;gRNA[myo-fem]♀/+																		12623	0	0
	50 gRNA[βTub]#7,gRNA[myo-fem]#1♂ X 50 nup50-Cas9/nup50-Cas9♀	3959	3137	79.2372	2442	77.8451	0.0946764	Cas9♀/+;gRNA[βTub]♂/+;gRNA[myo-fem]♂/+	61.6822	1413	102	92.7813	0	100	1228	97	92.101	1131	0	238	0.210433	46.31	1844	62	3.36226	14234	0	0
	50 gRNA[βTub]#7,gRNA[myo-fem]#1♂ X 50 nup50-Cas9/nup50-Cas9♀	3216	2672	83.0846	2076	77.6946	0.0696108	Cas9♀/+;gRNA[βTub]♂/+;gRNA[myo-fem]♂/+	64.5522	1125	93	91.7333	0	100	1156	112	90.3114	1044	0	165	0.158046	50.29	1852	0	0	16859	0	0
	50 gRNA[βTub]#7,gRNA[myo-fem]#1♂ X 50 nup50-Cas9/nup50-Cas9♀	3782	3015	79.7197	2162	71.7081	0.148259	Cas9♀/+;gRNA[βTub]♂/+;gRNA[myo-fem]♂/+	57.1655	1226	115	90.6199	0	100	1139	88	92.2739	1051	0	159	0.151284	48.61	2569	38	1.47917	15455	0	0
	50 Cas9♀/+;gRNA[βTub]♂/+;gRNA[myo-fem]♂/+ ♂ X 50 wt♀							Cas9♀/+;gRNA[βTub]♂/+;gRNA[myo-fem]♂/+																		16296	0	0
	50 Cas9♀/+;gRNA[βTub]♂/+;gRNA[myo-fem]♂/+ ♂ X 50 wt♀							Cas9♀/+;gRNA[βTub]♂/+;gRNA[myo-fem]♂/+																		16481	0	0
	50 Cas9♀/+;gRNA[βTub]♂/+;gRNA[myo-fem]♂/+ ♂ X 50 wt♀							Cas9♀/+;gRNA[βTub]♂/+;gRNA[myo-fem]♂/+																		15265	0	0
	50 Cas9♀/+;gRNA[βTub]♂/+;gRNA[myo-fem]♂/+ ♂ X 50 wt♀							Cas9♀/+;gRNA[βTub]♂/+;gRNA[myo-fem]♂/+																		17186	0	0
	50 Cas9♀/+;gRNA[βTub]♂/+;gRNA[myo-fem]♂/+ ♂ X 50 wt♀							Cas9♀/+;gRNA[βTub]♂/+;gRNA[myo-fem]♂/+																		15460	0	0
	50 Cas9♀/+;gRNA[βTub]♂/+;gRNA[myo-fem]♂/+ ♂ X 50 wt♀							Cas9♀/+;gRNA[βTub]♂/+;gRNA[myo-fem]♂/+																		8991	0	0
	50 Cas9♀/+;gRNA[βTub]♂/+;gRNA[myo-fem]♂/+ ♂ X 50 wt♀							Cas9♀/+;gRNA[βTub]♂/+;gRNA[myo-fem]♂/+																		13969	0	0

## Sheet: Statistic analysis
egg-to-adult survival				♀/(♀+♂) emerged adults				♂ pupa-to-adult survival				♀ pupa-to-adult survival				♂ flight capacity				♂ fertility				♀ flight capacity				♀ fertility
two-sided t-test with equal variances				two-sided t-test with equal variances				two-sided t-test with equal variances				two-sided t-test with equal variances				two-sided t-test with equal variances				two-sided t-test with equal variances				two-sided t-test with equal variances				two-sided t-test with equal variances
wt vs Cas9♀/+	t Ratio	4.989		wt vs Cas9♀/+	t Ratio	0.738		wt vs Cas9♀/+	t Ratio	2.104		wt vs Cas9♀/+	t Ratio	2.087		wt vs Cas9♀/+	t Ratio	N/A		wt vs Cas9♀/+	t Ratio	6.207		wt vs Cas9♀/+	t Ratio	N/A		wt vs Cas9♀/+	t Ratio	6.724
	df	6			df	6			df	6			df	6			df	6			df	9			df	6			df	9
	mean [wt]	84.715			mean [wt]	50.789			mean [wt]	96.025			mean [wt]	96.416			mean [wt]	100			mean [wt]	95.987			mean [wt]	100			mean [wt]	95.987
	mean [Cas9♀/+]	67.73			mean [Cas9♀/+]	49.712			mean [Cas9♀/+]	94.687			mean [Cas9♀/+]	94.148			mean [Cas9♀/+]	100			mean [Cas9♀/+]	89.02			mean [Cas9♀/+]	100			mean [Cas9♀/+]	89.085
	P value	0.003			P value	0.4883			P value	0.081			P value	0.082			P value	N/A			P value	0.0002			P value	N/A			P value	<0.0001
	Significant	Yes			Significant	No			Significant	No			Significant	No			Significant	No			Significant	Yes			Significant	No			Significant	Yes
two-sided t-test with equal variances				two-sided t-test with equal variances				two-sided t-test with equal variances				two-sided t-test with equal variances				two-sided t-test with equal variances				two-sided t-test with equal variances				two-sided t-test with equal variances				two-sided t-test with equal variances
wt vs Cas9♂/+	t Ratio	3.629		wt vs Cas9♂/+	t Ratio	0.285		wt vs Cas9♂/+	t Ratio	2.171		wt vs Cas9♂/+	t Ratio	1.33		wt vs Cas9♂/+	t Ratio	N/A		wt vs Cas9♂/+	t Ratio	5.517		wt vs Cas9♂/+	t Ratio	N/A		wt vs Cas9♂/+	t Ratio	6.307
	df	6			df	6			df	6			df	6			df	6			df	9			df	6			df	9
	mean [wt]	84.715			mean [wt]	50.789			mean [wt]	96.025			mean [wt]	96.416			mean [wt]	100			mean [wt]	95.987			mean [wt]	100			mean [wt]	95.987
	mean [Cas9♂/+]	76.022			mean [Cas9♂/+]	50.521			mean [Cas9♂/+]	94.925			mean [Cas9♂/+]	95.416			mean [Cas9♂/+]	100			mean [Cas9♂/+]	90.409			mean [Cas9♂/+]	100			mean [Cas9♂/+]	89.785
	P value	0.011			P value	0.785			P value	0.073			P value	0.232			P value	N/A			P value	0.0004			P value	N/A			P value	0.0001
	Significant	Yes			Significant	No			Significant	No			Significant	No			Significant	No			Significant	Yes			Significant	No			Significant	Yes
two-sided t-test with equal variances				two-sided t-test with equal variances				two-sided t-test with equal variances				two-sided t-test with equal variances				two-sided t-test with equal variances				two-sided t-test with equal variances				two-sided t-test with equal variances				two-sided t-test with equal variances
wt vs gRNA♀/+	t Ratio	4.394		wt vs gRNA♀/+	t Ratio	2.043		wt vs gRNA♀/+	t Ratio	4.039		wt vs gRNA♀/+	t Ratio	3.123		wt vs gRNA♀/+	t Ratio	N/A		wt vs gRNA♀/+	t Ratio	5.46		wt vs gRNA♀/+	t Ratio	N/A		wt vs gRNA♀/+	t Ratio	5.947
	df	6			df	6			df	6			df	6			df	6			df	9			df	6			df	9
	mean [wt]	84.715			mean [wt]	50.789			mean [wt]	96.025			mean [wt]	96.148			mean [wt]	100			mean [wt]	95.987			mean [wt]	100			mean [wt]	95.987
	mean [gRNA♀/+]	74.19			mean [gRNA♀/+]	48.613			mean [gRNA♀/+]	93.795			mean [gRNA♀/+]	93.179			mean [gRNA♀/+]	100			mean [gRNA♀/+]	89.934			mean [gRNA♀/+]	100			mean [gRNA♀/+]	88.773
	P value	0.005			P value	0.087			P value	0.007			P value	0.021			P value	N/A			P value	0.0004			P value	N/A			P value	0.0002
	Significant	Yes			Significant	No			Significant	Yes			Significant	Yes			Significant	No			Significant	Yes			Significant	No			Significant	Yes
two-sided t-test with equal variances				two-sided t-test with equal variances				two-sided t-test with equal variances				two-sided t-test with equal variances				two-sided t-test with equal variances				two-sided t-test with equal variances				two-sided t-test with equal variances				two-sided t-test with equal variances
wt vs gRNA♂/+	t Ratio	2.22		wt vs gRNA♂/+	t Ratio	0.78		wt vs gRNA♂/+	t Ratio	-0.031		wt vs gRNA♂/+	t Ratio	1.478		wt vs gRNA♂/+	t Ratio	N/A		wt vs gRNA♂/+	t Ratio	4.442		wt vs gRNA♂/+	t Ratio	N/A		wt vs gRNA♂/+	t Ratio	4.972
	df	6			df	6			df	6			df	6			df	6			df	9			df	6			df	9
	mean [wt]	84.715			mean [wt]	50.789			mean [wt]	96.025			mean [wt]	96.148			mean [wt]	100			mean [wt]	95.987			mean [wt]	100			mean [wt]	95.987
	mean [gRNA♂/+]	79			mean [gRNA♂/+]	49.728			mean [gRNA♂/+]	96.04			mean [gRNA♂/+]	95.206			mean [gRNA♂/+]	100			mean [gRNA♂/+]	90.438			mean [gRNA♂/+]	100			mean [gRNA♂/+]	89.419
	P value	0.068			P value	0.465			P value	0.976			P value	0.189			P value	N/A			P value	0.0016			P value	N/A			P value	0.0008
	Significant	No			Significant	No			Significant	No			Significant	No			Significant	No			Significant	Yes			Significant	No			Significant	Yes
two-sided t-test with equal variances				two-sided t-test with equal variances				two-sided t-test with equal variances				two-sided t-test with equal variances				two-sided t-test with equal variances				two-sided t-test with unequal variances				two-sided t-test with unequal variances				two-sided t-test with equal variances
wt vs Cas9♀/+;gRNA♂/+	t Ratio	8.349		wt vs Cas9♀/+;gRNA♂/+	t Ratio	1.964		wt vs Cas9♀/+;gRNA♂/+	t Ratio	6.657		wt vs Cas9♀/+;gRNA♂/+	t Ratio	5.345		wt vs Cas9♀/+;gRNA♂/+	t Ratio	N/A		wt vs Cas9♀/+;gRNA♂/+	t Ratio	175.09		wt vs Cas9♀/+;gRNA♂/+	ChiSquare	N/A		wt vs Cas9♀/+;gRNA♂/+	t Ratio	88.144
	df	6			df	6			df	6			df	6			df	6			df	7			df	6			df	9
	mean [wt]	84.715			mean [wt]	50.789			mean [wt]	96.025			mean [wt]	96.416			mean [wt]	100			mean [wt]	95.987			mean [wt]	100			mean [wt]	95.987
	mean [Cas9♀/+;gRNA♂/+]	61.133			mean [Cas9♀/+;gRNA♂/+]	48.505			mean [Cas9♀/+;gRNA♂/+]	91.711			mean [Cas9♀/+;gRNA♂/+]	91.562			mean [Cas9♀/+;gRNA♂/+]	100			mean [Cas9♀/+;gRNA♂/+]	0			mean [Cas9♀/+;gRNA♂/+]	0			mean [Cas9♀/+;gRNA♂/+]	1.614
	P value	0.0002			P value	0.097			P value	0.0006			P value	0.002			P value	N/A			P value	<0.0001			P value	<0.0001			P value	<0.001
	Significant	Yes			Significant	No			Significant	Yes			Significant	Yes			Significant	No			Significant	Yes			Significant	Yes			Significant	Yes
two-sided t-test with equal variances				two-sided t-test with equal variances				two-sided t-test with equal variances				two-sided t-test with equal variances				two-sided t-test with equal variances				two-sided t-test with unequal variances				two-sided t-test with unequal variances				two-sided t-test with equal variances
wt vs Cas9♂/+;gRNA♀/+	t Ratio	6.481		wt vs Cas9♂/+;gRNA♀/+	t Ratio	0.265		wt vs Cas9♂/+;gRNA♀/+	t Ratio	2.536		wt vs Cas9♂/+;gRNA♀/+	t Ratio	2.055		wt vs Cas9♂/+;gRNA♀/+	t Ratio	N/A		wt vs Cas9♂/+;gRNA♀/+	t Ratio	193/.193		wt vs Cas9♂/+;gRNA♀/+	ChiSquare	N/A		wt vs Cas9♂/+;gRNA♀/+	t Ratio	89.68
	df	6			df	6			df	6			df	6			df	6			df	7			df	6			df	9
	mean [wt]	84.715			mean [wt]	50.789			mean [wt]	96.025			mean [wt]	96.416			mean [wt]	100			mean [wt]	95.987			mean [wt]	100			mean [wt]	95.987
	mean [Cas9♂/+;gRNA♀/+]	64.608			mean [Cas9♂/+;gRNA♀/+]	50.398			mean [Cas9♂/+;gRNA♀/+]	93.578			mean [Cas9♂/+;gRNA♀/+]	93.759			mean [Cas9♂/+;gRNA♀/+]	100			mean [Cas9♂/+;gRNA♀/+]	0			mean [Cas9♂/+;gRNA♀/+]	0			mean [Cas9♂/+;gRNA♀/+]	0.934
	P value	0.0006			P value	0.799			P value	0.044			P value	0.086			P value	N/A			P value	<0.0001			P value	<0.0001			P value	<0.001
	Significant	Yes			Significant	No			Significant	Yes			Significant	No			Significant	No			Significant	Yes			Significant	Yes			Significant	Yes
