# Supplementary material for: Eliminating Mosquitoes with Precision Guided Sterile Males
Source: Research Square preprint supplement (doi:10.21203/rs.3.rs-367110/v1), 2021-04-05
Supplement: Supplementary file 13 [file Table S5 - Life Parameters.xlsx]

## Sheet: (A) Fertility & Longevity
Table S5. Life parameters.
Test group	♀/♂ individual mosquito	♀ took bloodmeal (Y/N)	laid egg #	Hatched egg #	Egg Hatching %	♂ larva-to-pupa dev. time (days)	♀ larva-to-pupa dev. time (days)	♂ pupa-to-adult dev. time (days)	♀ pupa-to-adult dev. time (days)	Adult ♀ longevity with ♂s (days)	Adult ♀ longevity alone (days)	Adult ♂ longevity with ♀s (days)	Adult ♂ longevity alone (days)
WT	1	Y	80	79	98.75	5	5.5	1.5	1.5	2	3	2	3
WT	2	Y	93	93	100	5	6	1.5	1.5	6	7	3	5
WT	3	Y	96	94	97.9167	5	6	1.5	1.5	7	9	5	6
WT	4	Y	112	111	99.1071	5	6	2	2	10	11	5	7
WT	5	Y	96	92	95.8333	5.5	6	2	2	10	12	6	7
WT	6	Y	111	111	100	5.5	6	2	2	16	15	6	8
WT	7	Y	99	94	94.9495	5.5	6	2	2	17	18	7	9
WT	8	Y	71	69	97.1831	5.5	6	2	2	20	18	7	9
WT	9	Y	92	91	98.913	5.5	6.5	2	2	23	22	7	14
WT	10	Y	105	104	99.0476	5.5	6.5	2	2	23	22	7	15
WT	11	Y	111	107	96.3964	5.5	6.5	2	2	25	22	8	17
WT	12	Y	81	81	100	5.5	6.5	2	2	25	25	8	20
WT	13	Y	131	129	98.4733	5.5	6.5	2	2	25	26	8	20
WT	14	Y	102	99	97.0588	5.5	6.5	2	2	28	30	8	20
WT	15	Y	98	95	96.9388	5.5	6.5	2	2	28	35	8	23
WT	16	Y	109	104	95.4128	5.5	6.5	2	2	33	35	8	23
WT	17	Y	111	109	98.1982	5.5	6.5	2	2	33	35	9	23
WT	18	Y	129	129	100	5.5	6.5	2	2	33	39	9	24
WT	19	Y	134	131	97.7612	5.5	6.5	2	2	33	39	9	24
WT	20	Y	63	59	93.6508	6	6.5	2	2	34	39	9	24
WT	21	Y	109	109	100	6	6.5	2	2	36	39	9	25
WT	22	Y	118	118	100	6	6.5	2	2	39	40	9	25
WT	23	Y	119	115	96.6387	6	6.5	2	2	40	41	9	25
WT	24	Y	120	119	99.1667	6	6.5	2	2	40	41	10	25
WT	25	Y	78	75	96.1538	6	7	2	2	44	41	10	25
WT	26	Y	117	112	95.7265	6	7	2	2	47	44	10	26
WT	27	Y	136	130	95.5882	6	7	2	2	47	44	10	26
WT	28	Y	144	142	98.6111	6	7	2	2	47	44	10	26
WT	29	Y	133	133	100	6	7	2	2	47	45	10	26
WT	30	Y	64	62	96.875	6	7	2	2	47	50	10	27
WT	31	Y	142	139	97.8873	6	7	2	2	48	50	10	27
WT	32	Y	102	100	98.0392	6	7	2	2	53	51	11	27
WT	33	Y	84	81	96.4286	6	7	2	2	53	52	11	27
WT	34	Y	87	82	94.2529	6	7	2	2	55	52	11	28
WT	35	Y	144	141	97.9167	6	7	2	2	55	52	12	28
WT	36	Y	137	133	97.0803	6	7	2	2	55	53	12	28
WT	37	Y	90	90	100	6	7	2	2	55	53	12	29
WT	38	Y	101	100	99.0099	6.5	7	2	2	55	55	12	30
WT	39	Y	77	77	100	6.5	7	2	2	58	55	13	30
WT	40	Y	51	51	100	6.5	7	2	2	58	56	14	30
WT	41	Y	117	110	94.0171	6.5	7.5	2	2	58	56	14	31
WT	42	Y	112	109	97.3214	6.5	7.5	2	2	59	59	14	31
WT	43	Y	120	112	93.3333	6.5	7.5	2	2	63	60	15	31
WT	44	Y	111	108	97.2973	6.5	7.5	2	2	63	61	15	31
WT	45	Y	92	90	97.8261	6.5	7.5	2	2	63	62	15	33
WT	46	Y	84	81	96.4286	6.5	7.5	2	2	63	63	16	34
WT	47	Y	109	101	92.6606	7	7.5	2	2	66	63	17	34
WT	48	Y	96	90	93.75	7	8	2	2	68	63	17	35
WT	49	Y	116	114	98.2759	7	8	2	2	69	65	17	38
WT	50	Y	62	60	96.7742	7	8	2	2	71	69	17	38
WT	1	Y	114	114	100	5	5.5	1.5	1.5	7	2	3	1
WT	2	Y	118	115	97.4576	5	5.5	1.5	1.5	8	4	3	4
WT	3	Y	122	121	99.1803	5	6	1.5	1.5	11	4	4	6
WT	4	Y	104	104	100	5	6	1.5	2	11	7	4	9
WT	5	Y	123	120	97.561	5	6	1.5	2	11	9	5	10
WT	6	Y	81	78	96.2963	5	6	2	2	14	15	6	13
WT	7	Y	133	129	96.9925	5.5	6	2	2	17	19	6	13
WT	8	Y	92	92	100	5.5	6	2	2	22	24	7	15
WT	9	Y	75	73	97.3333	5.5	6	2	2	22	26	7	19
WT	10	Y	67	67	100	5.5	6	2	2	28	26	7	19
WT	11	Y	108	105	97.2222	5.5	6	2	2	31	29	7	19
WT	12	Y	124	121	97.5806	5.5	6.5	2	2	33	32	8	22
WT	13	Y	74	69	93.2432	5.5	6.5	2	2	33	35	8	22
WT	14	Y	111	102	91.8919	5.5	6.5	2	2	35	36	9	22
WT	15	Y	102	98	96.0784	5.5	6.5	2	2	35	38	9	22
WT	16	Y	134	129	96.2687	5.5	6.5	2	2	43	39	9	25
WT	17	Y	108	103	95.3704	5.5	6.5	2	2	43	39	9	25
WT	18	Y	76	73	96.0526	5.5	6.5	2	2	44	39	10	25
WT	19	Y	125	124	99.2	5.5	6.5	2	2	44	42	10	25
WT	20	Y	56	56	100	5.5	6.5	2	2	44	43	10	25
WT	21	Y	108	107	99.0741	6	6.5	2	2	48	43	10	25
WT	22	Y	42	39	92.8571	6	6.5	2	2	48	46	10	25
WT	23	Y	96	96	100	6	6.5	2	2	48	46	10	26
WT	24	Y	109	108	99.0826	6	6.5	2	2	49	46	10	26
WT	25	Y	93	93	100	6	6.5	2	2	49	46	10	26
WT	26	Y	134	130	97.0149	6	6.5	2	2	49	47	11	27
WT	27	Y	88	87	98.8636	6	6.5	2	2	49	49	11	27
WT	28	Y	82	80	97.561	6	7	2	2	51	49	11	27
WT	29	Y	118	104	88.1356	6	7	2	2	52	50	11	27
WT	30	Y	67	65	97.0149	6	7	2	2	55	50	11	27
WT	31	Y	105	101	96.1905	6	7	2	2	55	50	11	27
WT	32	Y	88	87	98.8636	6	7	2	2	55	51	12	27
WT	33	Y	46	44	95.6522	6	7	2	2	55	51	12	28
WT	34	Y	125	122	97.6	6	7	2	2	55	51	12	28
WT	35	Y	133	131	98.4962	6	7	2	2	57	52	12	29
WT	36	Y	111	111	100	6	7	2	2	57	53	12	29
WT	37	Y	49	45	91.8367	6.5	7	2	2	58	53	12	29
WT	38	Y	114	107	93.8596	6.5	7	2	2	58	53	12	31
WT	39	Y	122	111	90.9836	6.5	7	2	2	60	53	12	33
WT	40	Y	85	84	98.8235	6.5	7.5	2	2	60	53	12	33
WT	41	Y	103	95	92.233	6.5	7.5	2	2	60	54	13	33
WT	42	Y	119	114	95.7983	6.5	7.5	2	2	60	54	13	33
WT	43	Y	102	98	96.0784	6.5	7.5	2	2	61	57	13	33
WT	44	Y	112	108	96.4286	6.5	7.5	2	2	61	57	13	35
WT	45	Y	105	105	100	6.5	7.5	2	2	63	58	14	35
WT	46	Y	67	63	94.0299	7	7.5	2	2	65	58	14	35
WT	47	Y	113	107	94.6903	7	7.5	2	2	68	58	14	35
WT	48	Y	83	80	96.3855	7	7.5	2	2	68	59	14	36
WT	49	Y	98	94	95.9184	7	7.5	2	2	68	64	16	36
WT	50	Y	0	0		7	8	2	2	71	65	16	36
WT	1	Y	77	73	94.8052	5	6	1.5	1.5	3	6	1	3
WT	2	Y	102	102	100	5	6	1.5	1.5	3	6	1	4
WT	3	Y	135	132	97.7778	5	6	1.5	1.5	4	7	2	5
WT	4	Y	94	93	98.9362	5	6	1.5	2	6	9	3	7
WT	5	Y	90	90	100	5	6	1.5	2	6	11	5	9
WT	6	Y	75	72	96	5.5	6	2	2	6	11	6	12
WT	7	Y	119	119	100	5.5	6	2	2	8	13	7	13
WT	8	Y	104	100	96.1538	5.5	6	2	2	8	13	7	14
WT	9	Y	128	125	97.6562	5.5	6	2	2	9	13	7	18
WT	10	Y	84	83	98.8095	5.5	6	2	2	15	14	8	19
WT	11	Y	92	89	96.7391	5.5	6	2	2	17	15	8	20
WT	12	Y	101	101	100	5.5	6	2	2	24	15	8	21
WT	13	Y	118	112	94.9153	5.5	6.5	2	2	24	19	9	23
WT	14	Y	96	93	96.875	5.5	6.5	2	2	24	19	9	23
WT	15	Y	109	108	99.0826	5.5	6.5	2	2	24	19	10	24
WT	16	Y	117	105	89.7436	5.5	6.5	2	2	25	21	10	25
WT	17	Y	138	124	89.8551	5.5	6.5	2	2	29	23	10	25
WT	18	Y	123	121	98.374	5.5	6.5	2	2	29	23	10	25
WT	19	Y	110	109	99.0909	5.5	6.5	2	2	29	24	10	25
WT	20	Y	93	92	98.9247	5.5	6.5	2	2	29	26	10	26
WT	21	Y	62	60	96.7742	5.5	6.5	2	2	32	26	10	26
WT	22	Y	85	81	95.2941	5.5	6.5	2	2	34	26	11	26
WT	23	Y	108	108	100	6	6.5	2	2	36	30	11	26
WT	24	Y	119	115	96.6387	6	6.5	2	2	42	30	11	26
WT	25	Y	81	73	90.1235	6	6.5	2	2	42	30	11	27
WT	26	Y	101	99	98.0198	6	6.5	2	2	44	35	12	27
WT	27	Y	125	120	96	6	6.5	2	2	46	37	12	27
WT	28	Y	93	85	91.3978	6	6.5	2	2	46	42	12	27
WT	29	Y	128	124	96.875	6	6.5	2	2	46	45	12	27
WT	30	Y	79	79	100	6	6.5	2	2	47	45	12	27
WT	31	Y	93	92	98.9247	6	7	2	2	47	45	12	27
WT	32	Y	112	101	90.1786	6	7	2	2	47	46	12	27
WT	33	Y	99	96	96.9697	6	7	2	2	47	47	13	27
WT	34	Y	127	123	96.8504	6.5	7	2	2	47	47	13	27
WT	35	Y	87	65	74.7126	6.5	7	2	2	49	47	13	28
WT	36	Y	84	82	97.619	6.5	7	2	2	49	49	13	29
WT	37	Y	95	95	100	6.5	7	2	2	49	49	13	29
WT	38	Y	130	126	96.9231	6.5	7	2	2	52	52	13	29
WT	39	Y	115	111	96.5217	6.5	7	2	2	52	52	13	29
WT	40	Y	126	122	96.8254	6.5	7	2	2	54	57	13	30
WT	41	Y	68	65	95.5882	6.5	7	2	2	55	57	14	30
WT	42	Y	88	86	97.7273	6.5	7	2	2	58	60	14	30
WT	43	Y	124	121	97.5806	6.5	7.5	2	2	58	63	14	31
WT	44	Y	80	77	96.25	6.5	7.5	2	2	58	65	14	33
WT	45	Y	92	90	97.8261	7	7.5	2	2	58	66	15	34
WT	46	Y	104	104	100	7	7.5	2	2	59	66	15	35
WT	47	Y	94	94	100	7	7.5	2	2	60	69	15	36
WT	48	Y	93	86	92.4731	7	7.5	2	2	64	70	15	39
WT	49	Y	75	72	96	7	7.5	2	2	64	71	17	39
WT	50	Y	89	87	97.7528	7	7.5	2	2	67	73	18	39
Cas9/Cas9	1	Y	79	70	88.6076	5.5	6.5	1.5	1.5	2	2	1	2
Cas9/Cas9	2	Y	97	92	94.8454	5.5	6.5	1.5	1.5	3	4	1	2
Cas9/Cas9	3	Y	95	80	84.2105	5.5	6.5	2	1.5	3	5	1	2
Cas9/Cas9	4	Y	126	92	73.0159	5.5	6.5	2	1.5	6	5	2	3
Cas9/Cas9	5	Y	85	69	81.1765	5.5	7	2	2	7	9	2	3
Cas9/Cas9	6	Y	71	65	91.5493	5.5	7	2	2	11	10	3	5
Cas9/Cas9	7	Y	83	72	86.747	5.5	7	2	2	13	10	3	6
Cas9/Cas9	8	Y	88	67	76.1364	6	7	2	2	14	13	4	6
Cas9/Cas9	9	Y	125	102	81.6	6	7	2	2	16	14	4	6
Cas9/Cas9	10	Y	85	73	85.8824	6	7	2	2	16	17	4	8
Cas9/Cas9	11	Y	82	75	91.4634	6	7	2	2	16	17	4	8
Cas9/Cas9	12	Y	88	76	86.3636	6	7	2	2	19	22	4	8
Cas9/Cas9	13	Y	53	48	90.566	6	7	2	2	20	22	5	9
Cas9/Cas9	14	Y	84	69	82.1429	6	7	2	2	25	23	5	9
Cas9/Cas9	15	Y	49	35	71.4286	6	7	2	2	25	25	6	13
Cas9/Cas9	16	Y	85	74	87.0588	6	7	2	2	27	25	6	15
Cas9/Cas9	17	Y	136	124	91.1765	6	7	2	2	27	27	7	15
Cas9/Cas9	18	Y	80	68	85	6	7.5	2	2	30	28	7	17
Cas9/Cas9	19	Y	95	87	91.5789	6	7.5	2	2	33	30	8	19
Cas9/Cas9	20	Y	91	80	87.9121	6	7.5	2	2	33	30	8	20
Cas9/Cas9	21	Y	87	73	83.908	6.5	7.5	2	2	33	31	9	23
Cas9/Cas9	22	Y	82	69	84.1463	6.5	7.5	2	2	35	31	9	23
Cas9/Cas9	23	Y	89	81	91.0112	6.5	7.5	2	2	37	31	10	24
Cas9/Cas9	24	Y	76	66	86.8421	6.5	7.5	2	2	37	34	10	24
Cas9/Cas9	25	Y	119	97	81.5126	6.5	7.5	2	2	39	36	11	25
Cas9/Cas9	26	Y	103	93	90.2913	6.5	7.5	2	2	39	37	11	25
Cas9/Cas9	27	Y	94	81	86.1702	6.5	7.5	2	2	39	37	11	26
Cas9/Cas9	28	Y	88	74	84.0909	6.5	7.5	2	2	42	37	12	26
Cas9/Cas9	29	Y	70	63	90	6.5	7.5	2	2	43	38	12	28
Cas9/Cas9	30	Y	84	68	80.9524	6.5	7.5	2	2	43	38	12	30
Cas9/Cas9	31	Y	80	71	88.75	6.5	7.5	2	2	43	39	12	30
Cas9/Cas9	32	Y	96	83	86.4583	6.5	8	2	2	44	41	12	30
Cas9/Cas9	33	Y	91	80	87.9121	6.5	8	2	2	47	41	12	30
Cas9/Cas9	34	Y	77	65	84.4156	6.5	8	2	2	47	43	12	31
Cas9/Cas9	35	Y	62	42	67.7419	6.5	8	2	2	47	44	13	31
Cas9/Cas9	36	Y	105	87	82.8571	6.5	8	2	2	49	44	13	31
Cas9/Cas9	37	Y	117	99	84.6154	7	8	2	2	49	44	14	32
Cas9/Cas9	38	Y	91	78	85.7143	7	8	2	2	52	45	14	32
Cas9/Cas9	39	Y	95	84	88.4211	7	8	2	2	52	45	14	33
Cas9/Cas9	40	Y	84	71	84.5238	7	8	2	2	52	49	14	33
Cas9/Cas9	41	Y	80	65	81.25	7	8	2	2	55	50	15	33
Cas9/Cas9	42	Y	92	84	91.3043	7	8	2	2	57	53	15	33
Cas9/Cas9	43	Y	112	105	93.75	7	8	2	2	58	53	15	34
Cas9/Cas9	44	Y	96	86	89.5833	7	8	2	2	60	53	16	35
Cas9/Cas9	45	Y	72	63	87.5	7.5	8.5	2	2	62	59	16	35
Cas9/Cas9	46	Y	84	66	78.5714	7.5	8.5	2	2	62	61	16	35
Cas9/Cas9	47	Y	27	22	81.4815	7.5	8.5	2	2	64	61	17	35
Cas9/Cas9	48	Y	0	0		7.5	8.5	2	2	69	67	17	39
Cas9/Cas9	49	Y	0	0		7.5	9	2	2	70	67	18	39
Cas9/Cas9	50	Y	0	0		7.5	9	2	2	70	67	18	41
Cas9/Cas9	1	Y	65	61	93.8462	5.5	6	1.5	1.5	4	1	3	2
Cas9/Cas9	2	Y	72	48	66.6667	5.5	6.5	1.5	1.5	7	5	3	2
Cas9/Cas9	3	Y	81	53	65.4321	5.5	6.5	1.5	1.5	9	7	3	4
Cas9/Cas9	4	Y	76	72	94.7368	5.5	6.5	1.5	2	10	8	4	4
Cas9/Cas9	5	Y	83	68	81.9277	5.5	6.5	2	2	15	10	4	5
Cas9/Cas9	6	Y	95	81	85.2632	6	6.5	2	2	17	15	4	6
Cas9/Cas9	7	Y	86	69	80.2326	6	7	2	2	20	15	5	7
Cas9/Cas9	8	Y	79	68	86.0759	6	7	2	2	20	21	5	7
Cas9/Cas9	9	Y	108	92	85.1852	6	7	2	2	24	21	5	9
Cas9/Cas9	10	Y	66	60	90.9091	6	7	2	2	24	21	5	9
Cas9/Cas9	11	Y	59	32	54.2373	6	7	2	2	25	23	6	11
Cas9/Cas9	12	Y	87	64	73.5632	6	7	2	2	25	25	6	12
Cas9/Cas9	13	Y	92	75	81.5217	6	7	2	2	25	26	6	13
Cas9/Cas9	14	Y	85	78	91.7647	6	7	2	2	26	26	6	13
Cas9/Cas9	15	Y	115	93	80.8696	6	7	2	2	26	26	7	13
Cas9/Cas9	16	Y	75	70	93.3333	6	7	2	2	26	29	7	15
Cas9/Cas9	17	Y	68	38	55.8824	6	7	2	2	28	29	7	15
Cas9/Cas9	18	Y	62	35	56.4516	6.5	7	2	2	28	29	7	15
Cas9/Cas9	19	Y	74	57	77.027	6.5	7	2	2	28	30	7	18
Cas9/Cas9	20	Y	89	68	76.4045	6.5	7	2	2	30	31	8	18
Cas9/Cas9	21	Y	92	83	90.2174	6.5	7.5	2	2	31	32	8	18
Cas9/Cas9	22	Y	83	65	78.3133	6.5	7.5	2	2	31	33	8	21
Cas9/Cas9	23	Y	112	79	70.5357	6.5	7.5	2	2	31	33	9	22
Cas9/Cas9	24	Y	94	87	92.5532	6.5	7.5	2	2	32	33	9	22
Cas9/Cas9	25	Y	86	72	83.7209	6.5	7.5	2	2	33	34	10	22
Cas9/Cas9	26	Y	83	69	83.1325	6.5	7.5	2	2	35	35	10	23
Cas9/Cas9	27	Y	95	64	67.3684	6.5	7.5	2	2	35	35	11	23
Cas9/Cas9	28	Y	66	57	86.3636	6.5	7.5	2	2	35	38	11	25
Cas9/Cas9	29	Y	72	67	93.0556	6.5	7.5	2	2	35	42	12	26
Cas9/Cas9	30	Y	58	49	84.4828	6.5	7.5	2	2	39	42	12	26
Cas9/Cas9	31	Y	52	44	84.6154	6.5	7.5	2	2	44	42	12	26
Cas9/Cas9	32	Y	93	58	62.3656	6.5	7.5	2	2	45	43	13	27
Cas9/Cas9	33	Y	101	73	72.2772	6.5	7.5	2	2	48	41	13	27
Cas9/Cas9	34	Y	72	68	94.4444	6.5	7.5	2	2	48	43	13	27
Cas9/Cas9	35	Y	67	56	83.5821	6.5	7.5	2	2	48	47	13	27
Cas9/Cas9	36	Y	73	51	69.863	7	8	2	2	49	47	14	27
Cas9/Cas9	37	Y	100	86	86	7	8	2	2	50	48	14	27
Cas9/Cas9	38	Y	74	65	87.8378	7	8	2	2	50	50	14	27
Cas9/Cas9	39	Y	80	67	83.75	7	8	2	2	50	50	14	28
Cas9/Cas9	40	Y	65	54	83.0769	7	8	2	2	50	51	15	28
Cas9/Cas9	41	Y	78	63	80.7692	7	8	2	2	51	52	15	30
Cas9/Cas9	42	Y	46	40	86.9565	7	8	2	2	51	52	15	32
Cas9/Cas9	43	Y	91	85	93.4066	7	8	2	2	51	58	16	32
Cas9/Cas9	44	Y	78	71	91.0256	7	8	2	2	58	62	16	32
Cas9/Cas9	45	Y	113	92	81.4159	7.5	8	2	2	60	63	17	34
Cas9/Cas9	46	Y	62	55	88.7097	7.5	8	2	2	61	66	17	37
Cas9/Cas9	47	Y	75	58	77.3333	7.5	8.5	2	2	64	68	19	37
Cas9/Cas9	48	Y	0	0		7.5	8.5	2	2	67	70	19	38
Cas9/Cas9	49	Y	0	0		7.5	8.5	2	2	68	73	19	39
Cas9/Cas9	50	Y	0	0		8	8.5	2	2	68	75	19	40
Cas9/Cas9	1	Y	105	92	87.619	5.5	6.5	1.5	1.5	1	4	2	3
Cas9/Cas9	2	Y	82	55	67.0732	5.5	6.5	1.5	1.5	7	4	2	3
Cas9/Cas9	3	Y	75	62	82.6667	5.5	7	2	1.5	10	5	4	4
Cas9/Cas9	4	Y	81	75	92.5926	5.5	7	2	1.5	10	6	4	5
Cas9/Cas9	5	Y	63	55	87.3016	6	7	2	1.5	10	7	5	5
Cas9/Cas9	6	Y	85	54	63.5294	6	7	2	2	12	7	5	5
Cas9/Cas9	7	Y	42	37	88.0952	6	7	2	2	12	9	5	5
Cas9/Cas9	8	Y	76	60	78.9474	6	7	2	2	12	13	6	6
Cas9/Cas9	9	Y	80	73	91.25	6	7	2	2	13	17	6	6
Cas9/Cas9	10	Y	85	68	80	6	7	2	2	15	19	6	7
Cas9/Cas9	11	Y	72	54	75	6	7	2	2	19	26	6	8
Cas9/Cas9	12	Y	95	81	85.2632	6	7	2	2	21	28	7	9
Cas9/Cas9	13	Y	29	23	79.3103	6	7	2	2	21	28	7	9
Cas9/Cas9	14	Y	62	37	59.6774	6	7	2	2	24	28	7	11
Cas9/Cas9	15	Y	85	80	94.1176	6	7	2	2	26	33	7	11
Cas9/Cas9	16	Y	96	88	91.6667	6	7	2	2	29	33	8	13
Cas9/Cas9	17	Y	60	56	93.3333	6.5	7	2	2	29	33	8	13
Cas9/Cas9	18	Y	72	62	86.1111	6.5	7	2	2	34	34	8	13
Cas9/Cas9	19	Y	78	63	80.7692	6.5	7.5	2	2	34	36	8	14
Cas9/Cas9	20	Y	93	86	92.4731	6.5	7.5	2	2	34	36	8	15
Cas9/Cas9	21	Y	57	44	77.193	6.5	7.5	2	2	36	38	8	15
Cas9/Cas9	22	Y	114	75	65.7895	6.5	7.5	2	2	38	39	9	17
Cas9/Cas9	23	Y	102	88	86.2745	6.5	7.5	2	2	39	39	9	18
Cas9/Cas9	24	Y	58	41	70.6897	6.5	7.5	2	2	39	39	9	21
Cas9/Cas9	25	Y	97	65	67.0103	6.5	7.5	2	2	40	39	9	22
Cas9/Cas9	26	Y	63	52	82.5397	6.5	7.5	2	2	40	40	10	22
Cas9/Cas9	27	Y	87	80	91.954	6.5	7.5	2	2	40	41	10	23
Cas9/Cas9	28	Y	92	69	75	6.5	7.5	2	2	43	41	11	23
Cas9/Cas9	29	Y	84	65	77.381	6.5	7.5	2	2	43	41	11	23
Cas9/Cas9	30	Y	76	54	71.0526	6.5	7.5	2	2	43	42	12	24
Cas9/Cas9	31	Y	47	39	82.9787	6.5	7.5	2	2	46	43	12	25
Cas9/Cas9	32	Y	83	63	75.9036	6.5	7.5	2	2	46	44	13	28
Cas9/Cas9	33	Y	85	70	82.3529	6.5	7.5	2	2	46	44	13	28
Cas9/Cas9	34	Y	98	42	42.8571	6.5	8	2	2	46	45	13	28
Cas9/Cas9	35	Y	124	63	50.8065	7	8	2	2	47	45	14	29
Cas9/Cas9	36	Y	74	67	90.5405	7	8	2	2	47	48	14	29
Cas9/Cas9	37	Y	68	56	82.3529	7	8	2	2	47	48	14	29
Cas9/Cas9	38	Y	73	59	80.8219	7	8	2	2	48	49	15	29
Cas9/Cas9	39	Y	88	65	73.8636	7	8	2	2	48	55	15	30
Cas9/Cas9	40	Y	70	34	48.5714	7	8	2	2	48	56	15	30
Cas9/Cas9	41	Y	48	41	85.4167	7	8	2	2	52	56	15	31
Cas9/Cas9	42	Y	69	54	78.2609	7	8	2	2	52	57	16	31
Cas9/Cas9	43	Y	72	46	63.8889	7	8.5	2	2	52	57	16	32
Cas9/Cas9	44	Y	84	52	61.9048	7	8.5	2	2	56	57	16	33
Cas9/Cas9	45	Y	96	84	87.5	7.5	8.5	2	2	57	57	16	33
Cas9/Cas9	46	Y	87	60	68.9655	7.5	8.5	2	2	60	58	16	33
Cas9/Cas9	47	Y	82	66	80.4878	7.5	8.5	2	2	61	63	17	35
Cas9/Cas9	48	Y	71	53	74.6479	7.5	8.5	2	2	66	64	17	39
Cas9/Cas9	49	Y	59	47	79.661	7.5	8.5	2	2	67	65	19	39
Cas9/Cas9	50	Y	0	0		7.5	8.5	2	2	72	68	20	43
gRNAs/gRNAs	1	Y	102	81	79.4118	5.5	6.5	1.5	1.5	4	2	3	2
gRNAs/gRNAs	2	Y	85	76	89.4118	5.5	6.5	1.5	1.5	5	4	4	3
gRNAs/gRNAs	3	Y	115	98	85.2174	6	6.5	1.5	2	9	6	4	4
gRNAs/gRNAs	4	Y	91	80	87.9121	6	6.5	1.5	2	9	7	4	6
gRNAs/gRNAs	5	Y	113	101	89.3805	6	7	1.5	2	11	11	5	8
gRNAs/gRNAs	6	Y	67	61	91.0448	6	7	2	2	13	15	5	11
gRNAs/gRNAs	7	Y	85	74	87.0588	6	7	2	2	16	18	5	11
gRNAs/gRNAs	8	Y	97	83	85.567	6.5	7	2	2	16	18	6	13
gRNAs/gRNAs	9	Y	86	75	87.2093	6.5	7	2	2	17	21	7	14
gRNAs/gRNAs	10	Y	91	80	87.9121	6.5	7	2	2	23	21	8	14
gRNAs/gRNAs	11	Y	107	82	76.6355	6.5	7	2	2	24	22	8	17
gRNAs/gRNAs	12	Y	58	54	93.1034	6.5	7	2	2	24	22	9	17
gRNAs/gRNAs	13	Y	70	63	90	6.5	7	2	2	25	24	9	17
gRNAs/gRNAs	14	Y	93	81	87.0968	6.5	7	2	2	25	27	10	20
gRNAs/gRNAs	15	Y	72	64	88.8889	6.5	7	2	2	27	28	10	20
gRNAs/gRNAs	16	Y	113	105	92.9204	6.5	7	2	2	32	29	10	20
gRNAs/gRNAs	17	Y	92	82	89.1304	6.5	7	2	2	32	29	10	21
gRNAs/gRNAs	18	Y	86	81	94.186	6.5	7	2	2	32	32	10	22
gRNAs/gRNAs	19	Y	77	56	72.7273	6.5	7.5	2	2	34	33	10	24
gRNAs/gRNAs	20	Y	79	66	83.5443	6.5	7.5	2	2	35	36	10	24
gRNAs/gRNAs	21	Y	127	115	90.5512	6.5	7.5	2	2	35	36	10	24
gRNAs/gRNAs	22	Y	83	76	91.5663	6.5	7.5	2	2	38	36	10	25
gRNAs/gRNAs	23	Y	98	77	78.5714	6.5	7.5	2	2	38	36	10	26
gRNAs/gRNAs	24	Y	75	70	93.3333	6.5	7.5	2	2	40	37	10	26
gRNAs/gRNAs	25	Y	81	75	92.5926	6.5	7.5	2	2	41	37	11	26
gRNAs/gRNAs	26	Y	54	46	85.1852	6.5	7.5	2	2	41	37	11	28
gRNAs/gRNAs	27	Y	92	79	85.8696	6.5	7.5	2	2	41	37	11	28
gRNAs/gRNAs	28	Y	109	86	78.8991	6.5	7.5	2	2	43	39	11	28
gRNAs/gRNAs	29	Y	115	99	86.087	6.5	7.5	2	2	43	40	11	29
gRNAs/gRNAs	30	Y	84	80	95.2381	6.5	7.5	2	2	43	41	11	30
gRNAs/gRNAs	31	Y	32	28	87.5	6.5	7.5	2	2	44	41	11	30
gRNAs/gRNAs	32	Y	88	79	89.7727	7	7.5	2	2	44	41	11	30
gRNAs/gRNAs	33	Y	74	63	85.1351	7	7.5	2	2	47	42	11	30
gRNAs/gRNAs	34	Y	105	87	82.8571	7	7.5	2	2	47	43	12	30
gRNAs/gRNAs	35	Y	63	56	88.8889	7	7.5	2	2	47	45	12	30
gRNAs/gRNAs	36	Y	80	72	90	7	7.5	2	2	47	46	12	30
gRNAs/gRNAs	37	Y	89	74	83.1461	7	7.5	2	2	49	47	12	31
gRNAs/gRNAs	38	Y	129	112	86.8217	7	8	2	2	49	49	12	32
gRNAs/gRNAs	39	Y	96	80	83.3333	7	8	2	2	49	49	12	34
gRNAs/gRNAs	40	Y	83	72	86.747	7	8	2	2	50	49	12	34
gRNAs/gRNAs	41	Y	99	76	76.7677	7	8	2	2	52	53	12	35
gRNAs/gRNAs	42	Y	106	83	78.3019	7	8	2	2	54	55	13	35
gRNAs/gRNAs	43	Y	125	91	72.8	7	8	2	2	55	55	13	35
gRNAs/gRNAs	44	Y	93	85	91.3978	7	8	2	2	57	58	13	35
gRNAs/gRNAs	45	Y	82	78	95.122	7.5	8	2	2	58	58	13	36
gRNAs/gRNAs	46	Y	85	74	87.0588	7.5	8	2	2	58	58	13	36
gRNAs/gRNAs	47	Y	106	78	73.5849	7.5	8.5	2	2	58	58	13	36
gRNAs/gRNAs	48	Y	70	51	72.8571	7.5	8.5	2	2	58	61	15	37
gRNAs/gRNAs	49	Y	0	0		7.5	8.5	2	2	67	66	15	37
gRNAs/gRNAs	50	Y	0	0		7.5	8.5	2	2	70	68	16	37
gRNAs/gRNAs	1	Y	84	71	84.5238	5.5	6.5	1.5	1.5	6	3	2	2
gRNAs/gRNAs	2	Y	91	69	75.8242	5.5	6.5	1.5	1.5	9	3	2	2
gRNAs/gRNAs	3	Y	104	84	80.7692	5.5	6.5	1.5	1.5	11	4	2	5
gRNAs/gRNAs	4	Y	93	72	77.4194	5.5	7	2	2	13	6	3	5
gRNAs/gRNAs	5	Y	77	71	92.2078	6	7	2	2	13	13	3	5
gRNAs/gRNAs	6	Y	115	94	81.7391	6	7	2	2	14	13	3	8
gRNAs/gRNAs	7	Y	83	76	91.5663	6	7	2	2	15	13	4	10
gRNAs/gRNAs	8	Y	62	35	56.4516	6	7	2	2	15	15	4	10
gRNAs/gRNAs	9	Y	79	70	88.6076	6	7	2	2	16	17	4	15
gRNAs/gRNAs	10	Y	73	62	84.9315	6	7	2	2	19	18	4	16
gRNAs/gRNAs	11	Y	60	53	88.3333	6	7	2	2	22	23	5	16
gRNAs/gRNAs	12	Y	98	71	72.449	6	7	2	2	22	26	5	17
gRNAs/gRNAs	13	Y	82	68	82.9268	6	7	2	2	28	26	6	19
gRNAs/gRNAs	14	Y	95	79	83.1579	6	7	2	2	28	29	6	19
gRNAs/gRNAs	15	Y	64	53	82.8125	6	7	2	2	28	28	7	19
gRNAs/gRNAs	16	Y	126	81	64.2857	6	7	2	2	28	29	7	21
gRNAs/gRNAs	17	Y	83	59	71.0843	6	7	2	2	32	29	8	23
gRNAs/gRNAs	18	Y	95	48	50.5263	6.5	7	2	2	32	30	8	23
gRNAs/gRNAs	19	Y	48	41	85.4167	6.5	7	2	2	32	31	8	23
gRNAs/gRNAs	20	Y	90	82	91.1111	6.5	7	2	2	34	33	9	24
gRNAs/gRNAs	21	Y	87	56	64.3678	6.5	7	2	2	34	34	9	25
gRNAs/gRNAs	22	Y	66	60	90.9091	6.5	7	2	2	37	36	9	25
gRNAs/gRNAs	23	Y	115	96	83.4783	6.5	7.5	2	2	37	36	9	26
gRNAs/gRNAs	24	Y	94	86	91.4894	6.5	7.5	2	2	37	36	10	26
gRNAs/gRNAs	25	Y	99	82	82.8283	6.5	7.5	2	2	37	37	10	26
gRNAs/gRNAs	26	Y	13	8	61.5385	6.5	7.5	2	2	39	37	10	27
gRNAs/gRNAs	27	Y	82	74	90.2439	6.5	7.5	2	2	39	38	10	28
gRNAs/gRNAs	28	Y	85	58	68.2353	6.5	7.5	2	2	39	38	11	28
gRNAs/gRNAs	29	Y	64	42	65.625	6.5	7.5	2	2	42	39	11	28
gRNAs/gRNAs	30	Y	128	116	90.625	6.5	7.5	2	2	42	40	11	29
gRNAs/gRNAs	31	Y	53	48	90.566	6.5	7.5	2	2	42	44	11	29
gRNAs/gRNAs	32	Y	88	70	79.5455	6.5	7.5	2	2	42	44	11	29
gRNAs/gRNAs	33	Y	139	118	84.8921	6.5	7.5	2	2	44	44	12	29
gRNAs/gRNAs	34	Y	82	69	84.1463	6.5	7.5	2	2	44	44	12	30
gRNAs/gRNAs	35	Y	44	38	86.3636	7	7.5	2	2	45	44	12	30
gRNAs/gRNAs	36	Y	75	65	86.6667	7	7.5	2	2	45	47	12	30
gRNAs/gRNAs	37	Y	98	83	84.6939	7	8	2	2	46	47	13	32
gRNAs/gRNAs	38	Y	84	71	84.5238	7	8	2	2	47	47	13	34
gRNAs/gRNAs	39	Y	87	79	90.8046	7	8	2	2	50	47	13	36
gRNAs/gRNAs	40	Y	79	65	82.2785	7	8	2	2	50	50	14	36
gRNAs/gRNAs	41	Y	67	53	79.1045	7	8	2	2	50	50	14	36
gRNAs/gRNAs	42	Y	95	78	82.1053	7	8	2	2	53	50	14	36
gRNAs/gRNAs	43	Y	133	117	87.9699	7	8	2	2	53	53	14	37
gRNAs/gRNAs	44	Y	107	93	86.9159	7	8.5	2	2	53	56	15	37
gRNAs/gRNAs	45	Y	94	88	93.617	7	8.5	2	2	55	60	16	37
gRNAs/gRNAs	46	Y	87	83	95.4023	7	8.5	2	2	57	62	16	37
gRNAs/gRNAs	47	Y	94	78	82.9787	7.5	8.5	2	2	65	67	17	37
gRNAs/gRNAs	48	Y	75	69	92	7.5	8.5	2	2	65	67	19	37
gRNAs/gRNAs	49	Y	0	0		7.5	8.5	2	2	68	67	19	37
gRNAs/gRNAs	50	Y	0	0		7.5	8.5	2	2	73	67	19	38
gRNAs/gRNAs	1	Y	101	86	85.1485	5.5	6	1.5	1.5	4	4	1	4
gRNAs/gRNAs	2	Y	73	69	94.5205	6	6.5	1.5	1.5	9	5	1	4
gRNAs/gRNAs	3	Y	88	81	92.0455	6	6.5	2	1.5	10	5	2	5
gRNAs/gRNAs	4	Y	90	76	84.4444	6	6.5	2	2	14	6	2	5
gRNAs/gRNAs	5	Y	82	70	85.3659	6	6.5	2	2	16	6	3	6
gRNAs/gRNAs	6	Y	114	98	85.9649	6	7	2	2	19	7	3	7
gRNAs/gRNAs	7	Y	93	78	83.871	6	7	2	2	19	8	3	9
gRNAs/gRNAs	8	Y	74	58	78.3784	6	7	2	2	19	10	4	9
gRNAs/gRNAs	9	Y	92	79	85.8696	6	7	2	2	23	12	4	13
gRNAs/gRNAs	10	Y	65	46	70.7692	6.5	7	2	2	24	12	4	13
gRNAs/gRNAs	11	Y	129	115	89.1473	6.5	7	2	2	24	13	4	13
gRNAs/gRNAs	12	Y	81	60	74.0741	6.5	7	2	2	25	14	5	16
gRNAs/gRNAs	13	Y	54	47	87.037	6.5	7	2	2	28	17	6	16
gRNAs/gRNAs	14	Y	73	64	87.6712	6.5	7	2	2	28	17	6	17
gRNAs/gRNAs	15	Y	77	72	93.5065	6.5	7	2	2	28	23	6	20
gRNAs/gRNAs	16	Y	85	64	75.2941	6.5	7	2	2	30	26	7	20
gRNAs/gRNAs	17	Y	83	78	93.9759	6.5	7	2	2	30	28	7	20
gRNAs/gRNAs	18	Y	87	80	91.954	6.5	7	2	2	30	33	7	22
gRNAs/gRNAs	19	Y	95	84	88.4211	6.5	7	2	2	33	34	8	24
gRNAs/gRNAs	20	Y	98	81	82.6531	6.5	7	2	2	35	34	8	24
gRNAs/gRNAs	21	Y	45	32	71.1111	6.5	7.5	2	2	37	35	8	24
gRNAs/gRNAs	22	Y	108	94	87.037	6.5	7.5	2	2	37	37	9	24
gRNAs/gRNAs	23	Y	96	83	86.4583	6.5	7.5	2	2	38	39	9	26
gRNAs/gRNAs	24	Y	72	66	91.6667	6.5	7.5	2	2	39	39	10	26
gRNAs/gRNAs	25	Y	85	63	74.1176	6.5	7.5	2	2	39	39	10	26
gRNAs/gRNAs	26	Y	71	58	81.6901	6.5	7.5	2	2	42	39	10	28
gRNAs/gRNAs	27	Y	80	62	77.5	6.5	7.5	2	2	45	40	11	28
gRNAs/gRNAs	28	Y	63	53	84.127	6.5	7.5	2	2	45	42	11	29
gRNAs/gRNAs	29	Y	118	107	90.678	6.5	7.5	2	2	45	42	11	29
gRNAs/gRNAs	30	Y	124	102	82.2581	6.5	7.5	2	2	46	42	11	29
gRNAs/gRNAs	31	Y	64	47	73.4375	6.5	7.5	2	2	48	44	11	30
gRNAs/gRNAs	32	Y	88	79	89.7727	7	7.5	2	2	48	45	11	30
gRNAs/gRNAs	33	Y	52	45	86.5385	7	7.5	2	2	48	46	11	30
gRNAs/gRNAs	34	Y	99	56	56.5657	7	7.5	2	2	51	46	12	30
gRNAs/gRNAs	35	Y	35	30	85.7143	7	7.5	2	2	51	47	12	30
gRNAs/gRNAs	36	Y	69	61	88.4058	7	7.5	2	2	51	47	13	31
gRNAs/gRNAs	37	Y	116	89	76.7241	7	7.5	2	2	51	49	13	31
gRNAs/gRNAs	38	Y	98	78	79.5918	7	8	2	2	54	49	14	31
gRNAs/gRNAs	39	Y	70	62	88.5714	7	8	2	2	54	49	14	32
gRNAs/gRNAs	40	Y	83	64	77.1084	7	8	2	2	54	49	14	33
gRNAs/gRNAs	41	Y	87	75	86.2069	7	8	2	2	56	53	14	33
gRNAs/gRNAs	42	Y	94	82	87.234	7.5	8	2	2	58	55	15	33
gRNAs/gRNAs	43	Y	91	85	93.4066	7.5	8	2	2	61	58	15	34
gRNAs/gRNAs	44	Y	80	72	90	7.5	8	2	2	61	58	15	34
gRNAs/gRNAs	45	Y	84	77	91.6667	7.5	8	2	2	61	62	15	34
gRNAs/gRNAs	46	Y	66	56	84.8485	7.5	8.5	2	2	64	65	17	35
gRNAs/gRNAs	47	Y	83	68	81.9277	7.5	8.5	2	2	68	68	17	35
gRNAs/gRNAs	48	Y	0	0		7.5	8.5	2	2	72	68	19	35
gRNAs/gRNAs	49	Y	0	0		7.5	8.5	2	2	73	69	19	35
gRNAs/gRNAs	50	Y	0	0		7.5	8.5	2	2	75	70	20	35
gRNAs♀/+;Cas9♂/+	1	Y	26	0	0	6	6.5	1.5	1.5	1	2	2	2
gRNAs♀/+;Cas9♂/+	2	Y	20	0	0	6	6.5	2	1.5	1	2	2	3
gRNAs♀/+;Cas9♂/+	3	Y	13	0	0	6	7	2	1.5	1	2	3	5
gRNAs♀/+;Cas9♂/+	4	Y	5	0	0	6	7	2	1.5	1	3	4	5
gRNAs♀/+;Cas9♂/+	5	Y	13	0	0	6	7	2	2	2	3	4	7
gRNAs♀/+;Cas9♂/+	6	Y	68	0	0	6	7	2	2	2	3	5	9
gRNAs♀/+;Cas9♂/+	7	Y	0	0		6	7	2	2	2	3	6	10
gRNAs♀/+;Cas9♂/+	8	Y	74	0	0	6.5	7	2	2	2	4	6	13
gRNAs♀/+;Cas9♂/+	9	Y	21	0	0	6.5	7	2	2	3	4	7	13
gRNAs♀/+;Cas9♂/+	10	Y	4	0	0	6.5	7	2	2	3	4	7	13
gRNAs♀/+;Cas9♂/+	11	Y	16	0	0	6.5	7	2	2	3	5	7	16
gRNAs♀/+;Cas9♂/+	12	Y	25	0	0	6.5	7	2	2	4	5	8	16
gRNAs♀/+;Cas9♂/+	13	Y	25	0	0	6.5	7	2	2	4	5	8	16
gRNAs♀/+;Cas9♂/+	14	Y	0	0		6.5	7	2	2	4	6	8	17
gRNAs♀/+;Cas9♂/+	15	Y	13	0	0	6.5	7	2	2	4	6	8	17
gRNAs♀/+;Cas9♂/+	16	Y	21	0	0	6.5	7	2	2	5	6	9	19
gRNAs♀/+;Cas9♂/+	17	N				6.5	7	2	2	5	6	9	19
gRNAs♀/+;Cas9♂/+	18	N				6.5	7	2	2	5	6	9	19
gRNAs♀/+;Cas9♂/+	19	N				6.5	7	2	2	6	6	9	21
gRNAs♀/+;Cas9♂/+	20	N				6.5	7	2	2	6	6	9	24
gRNAs♀/+;Cas9♂/+	21	N				6.5	7	2	2	6	6	10	24
gRNAs♀/+;Cas9♂/+	22	N				6.5	7.5	2	2	6	6	10	24
gRNAs♀/+;Cas9♂/+	23	N				6.5	7.5	2	2	6	6	10	24
gRNAs♀/+;Cas9♂/+	24	N				7	7.5	2	2	6	7	10	25
gRNAs♀/+;Cas9♂/+	25	N				7	7.5	2	2	6	7	10	25
gRNAs♀/+;Cas9♂/+	26	N				7	7.5	2	2	6	7	10	28
gRNAs♀/+;Cas9♂/+	27	N				7	7.5	2	2	7	7	10	28
gRNAs♀/+;Cas9♂/+	28	N				7	7.5	2	2	7	7	10	29
gRNAs♀/+;Cas9♂/+	29	N				7	7.5	2	2	7	7	10	29
gRNAs♀/+;Cas9♂/+	30	N				7	7.5	2	2	7	7	11	29
gRNAs♀/+;Cas9♂/+	31	N				7	7.5	2	2	7	7	11	29
gRNAs♀/+;Cas9♂/+	32	N				7	7.5	2	2	7	7	11	29
gRNAs♀/+;Cas9♂/+	33	N				7	7.5	2	2	7	7	11	30
gRNAs♀/+;Cas9♂/+	34	N				7	7.5	2	2	7	8	11	30
gRNAs♀/+;Cas9♂/+	35	N				7	7.5	2	2	8	8	11	31
gRNAs♀/+;Cas9♂/+	36	N				7	7.5	2	2	8	8	12	32
gRNAs♀/+;Cas9♂/+	37	N				7	8	2	2	8	8	12	32
gRNAs♀/+;Cas9♂/+	38	N				7	8	2	2	8	8	12	35
gRNAs♀/+;Cas9♂/+	39	N				7	8	2	2	8	8	12	37
gRNAs♀/+;Cas9♂/+	40	N				7	8	2	2	9	8	13	37
gRNAs♀/+;Cas9♂/+	41	N				7	8	2	2	9	8	13	37
gRNAs♀/+;Cas9♂/+	42	N				7	8	2	2	9	8	14	38
gRNAs♀/+;Cas9♂/+	43	N				7	8	2	2	10	9	15	38
gRNAs♀/+;Cas9♂/+	44	N				7	8	2	2	11	9	15	39
gRNAs♀/+;Cas9♂/+	45	N				7	8	2	2	12	12	15	39
gRNAs♀/+;Cas9♂/+	46	N				7	8	2	2	15	13	15	40
gRNAs♀/+;Cas9♂/+	47	N				7.5	8.5	2	2	15	15	16	41
gRNAs♀/+;Cas9♂/+	48	N				7.5	8.5	2	2	17	15	16	41
gRNAs♀/+;Cas9♂/+	49	N				7.5	8.5	2	2	17	15	17	41
gRNAs♀/+;Cas9♂/+	50	N				7.5	8.5	2	2	22	15	18	41
gRNAs♀/+;Cas9♂/+	1	Y	71	0	0	6	7	1.5	1.5	1	1	1	3
gRNAs♀/+;Cas9♂/+	2	Y	28	0	0	6	7	1.5	1.5	1	1	2	3
gRNAs♀/+;Cas9♂/+	3	Y	11	0	0	6	7	1.5	2	1	1	2	3
gRNAs♀/+;Cas9♂/+	4	Y	15	0	0	6	7	1.5	2	1	2	4	4
gRNAs♀/+;Cas9♂/+	5	Y	49	0	0	6	7	1.5	2	1	2	4	6
gRNAs♀/+;Cas9♂/+	6	Y	0	0		6	7	2	2	2	2	4	7
gRNAs♀/+;Cas9♂/+	7	Y	42	0	0	6	7	2	2	2	2	5	9
gRNAs♀/+;Cas9♂/+	8	Y	7	0	0	6	7	2	2	2	2	6	9
gRNAs♀/+;Cas9♂/+	9	Y	28	0	0	6	7	2	2	2	3	6	12
gRNAs♀/+;Cas9♂/+	10	Y	73	0	0	6	7	2	2	3	3	7	14
gRNAs♀/+;Cas9♂/+	11	Y	14	0	0	6	7	2	2	3	3	7	14
gRNAs♀/+;Cas9♂/+	12	Y	35	0	0	6.5	7	2	2	3	4	7	17
gRNAs♀/+;Cas9♂/+	13	Y	0	0		6.5	7.5	2	2	3	4	8	17
gRNAs♀/+;Cas9♂/+	14	Y	12	0	0	6.5	7.5	2	2	4	4	8	18
gRNAs♀/+;Cas9♂/+	15	Y	26	0	0	6.5	7.5	2	2	4	4	8	20
gRNAs♀/+;Cas9♂/+	16	Y	38	0	0	6.5	7.5	2	2	4	5	9	20
gRNAs♀/+;Cas9♂/+	17	Y	25	0	0	6.5	7.5	2	2	4	5	9	22
gRNAs♀/+;Cas9♂/+	18	Y	13	0	0	6.5	7.5	2	2	4	5	9	22
gRNAs♀/+;Cas9♂/+	19	Y	8	0	0	6.5	7.5	2	2	5	5	10	22
gRNAs♀/+;Cas9♂/+	20	N				6.5	7.5	2	2	5	5	10	23
gRNAs♀/+;Cas9♂/+	21	N				6.5	7.5	2	2	5	5	10	23
gRNAs♀/+;Cas9♂/+	22	N				6.5	7.5	2	2	5	6	10	23
gRNAs♀/+;Cas9♂/+	23	N				6.5	7.5	2	2	6	6	10	27
gRNAs♀/+;Cas9♂/+	24	N				6.5	7.5	2	2	6	6	10	27
gRNAs♀/+;Cas9♂/+	25	N				6.5	7.5	2	2	6	6	10	27
gRNAs♀/+;Cas9♂/+	26	N				6.5	7.5	2	2	6	6	10	27
gRNAs♀/+;Cas9♂/+	27	N				6.5	7.5	2	2	6	6	11	27
gRNAs♀/+;Cas9♂/+	28	N				6.5	7.5	2	2	6	7	11	27
gRNAs♀/+;Cas9♂/+	29	N				6.5	7.5	2	2	6	7	11	27
gRNAs♀/+;Cas9♂/+	30	N				7	7.5	2	2	7	7	11	29
gRNAs♀/+;Cas9♂/+	31	N				7	7.5	2	2	7	8	11	29
gRNAs♀/+;Cas9♂/+	32	N				7	7.5	2	2	7	8	11	29
gRNAs♀/+;Cas9♂/+	33	N				7	8	2	2	7	8	12	29
gRNAs♀/+;Cas9♂/+	34	N				7	8	2	2	7	9	12	29
gRNAs♀/+;Cas9♂/+	35	N				7	8	2	2	8	9	12	29
gRNAs♀/+;Cas9♂/+	36	N				7	8	2	2	8	9	12	30
gRNAs♀/+;Cas9♂/+	37	N				7	8	2	2	8	9	12	30
gRNAs♀/+;Cas9♂/+	38	N				7	8	2	2	8	9	12	30
gRNAs♀/+;Cas9♂/+	39	N				7	8	2	2	9	9	13	30
gRNAs♀/+;Cas9♂/+	40	N				7	8	2	2	9	10	13	30
gRNAs♀/+;Cas9♂/+	41	N				7	8	2	2	9	10	14	30
gRNAs♀/+;Cas9♂/+	42	N				7	8	2	2	10	10	14	30
gRNAs♀/+;Cas9♂/+	43	N				7	8	2	2	10	11	14	30
gRNAs♀/+;Cas9♂/+	44	N				7	8	2	2	10	12	14	30
gRNAs♀/+;Cas9♂/+	45	N				7	8	2	2	14	12	15	31
gRNAs♀/+;Cas9♂/+	46	N				7	8	2	2	17	15	15	31
gRNAs♀/+;Cas9♂/+	47	N				7	8	2	2	17	17	15	31
gRNAs♀/+;Cas9♂/+	48	N				7	8.5	2	2	17	18	16	31
gRNAs♀/+;Cas9♂/+	49	N				7.5	8.5	2	2	20	18	17	33
gRNAs♀/+;Cas9♂/+	50	N				7.5	8.5	2	2	21	19	20	33
gRNAs♀/+;Cas9♂/+	1	Y	39	0	0	5.5	7	1.5	1.5	1	1	1	1
gRNAs♀/+;Cas9♂/+	2	Y	26	0	0	5.5	7	1.5	1.5	1	2	2	1
gRNAs♀/+;Cas9♂/+	3	Y	33	0	0	6	7	1.5	1.5	1	2	2	4
gRNAs♀/+;Cas9♂/+	4	Y	0	0		6	7	2	2	2	2	2	6
gRNAs♀/+;Cas9♂/+	5	Y	0	0		6	7	2	2	2	2	3	6
gRNAs♀/+;Cas9♂/+	6	Y	15	0	0	6	7	2	2	2	3	3	9
gRNAs♀/+;Cas9♂/+	7	Y	25	0	0	6	7	2	2	3	3	3	10
gRNAs♀/+;Cas9♂/+	8	Y	53	0	0	6	7	2	2	3	3	4	13
gRNAs♀/+;Cas9♂/+	9	Y	62	0	0	6	7	2	2	3	3	4	13
gRNAs♀/+;Cas9♂/+	10	Y	0	0		6	7	2	2	3	3	5	14
gRNAs♀/+;Cas9♂/+	11	Y	84	0	0	6	7	2	2	3	4	5	15
gRNAs♀/+;Cas9♂/+	12	N				6	7	2	2	4	4	6	16
gRNAs♀/+;Cas9♂/+	13	N				6	7	2	2	4	5	6	18
gRNAs♀/+;Cas9♂/+	14	N				6	7	2	2	5	5	6	21
gRNAs♀/+;Cas9♂/+	15	N				6	7.5	2	2	5	5	6	21
gRNAs♀/+;Cas9♂/+	16	N				6	7.5	2	2	5	5	7	21
gRNAs♀/+;Cas9♂/+	17	N				6.5	7.5	2	2	5	6	7	24
gRNAs♀/+;Cas9♂/+	18	N				6.5	7.5	2	2	6	6	7	24
gRNAs♀/+;Cas9♂/+	19	N				6.5	7.5	2	2	6	6	8	25
gRNAs♀/+;Cas9♂/+	20	N				6.5	7.5	2	2	6	6	8	25
gRNAs♀/+;Cas9♂/+	21	N				6.5	7.5	2	2	6	6	8	25
gRNAs♀/+;Cas9♂/+	22	N				6.5	7.5	2	2	6	6	8	25
gRNAs♀/+;Cas9♂/+	23	N				6.5	7.5	2	2	7	6	9	25
gRNAs♀/+;Cas9♂/+	24	N				6.5	7.5	2	2	7	6	9	26
gRNAs♀/+;Cas9♂/+	25	N				6.5	7.5	2	2	7	6	9	26
gRNAs♀/+;Cas9♂/+	26	N				6.5	7.5	2	2	7	7	9	26
gRNAs♀/+;Cas9♂/+	27	N				6.5	7.5	2	2	7	7	9	27
gRNAs♀/+;Cas9♂/+	28	N				6.5	7.5	2	2	8	7	10	27
gRNAs♀/+;Cas9♂/+	29	N				6.5	7.5	2	2	8	7	10	27
gRNAs♀/+;Cas9♂/+	30	N				6.5	7.5	2	2	8	7	10	27
gRNAs♀/+;Cas9♂/+	31	N				7	7.5	2	2	8	7	10	28
gRNAs♀/+;Cas9♂/+	32	N				7	7.5	2	2	8	7	11	28
gRNAs♀/+;Cas9♂/+	33	N				7	7.5	2	2	8	8	11	28
gRNAs♀/+;Cas9♂/+	34	N				7	8	2	2	9	8	11	28
gRNAs♀/+;Cas9♂/+	35	N				7	8	2	2	10	10	11	28
gRNAs♀/+;Cas9♂/+	36	N				7	8	2	2	10	10	12	28
gRNAs♀/+;Cas9♂/+	37	N				7	8	2	2	10	10	12	31
gRNAs♀/+;Cas9♂/+	38	N				7	8	2	2	10	13	12	31
gRNAs♀/+;Cas9♂/+	39	N				7	8	2	2	10	13	12	31
gRNAs♀/+;Cas9♂/+	40	N				7	8	2	2	11	13	13	33
gRNAs♀/+;Cas9♂/+	41	N				7	8	2	2	11	13	13	33
gRNAs♀/+;Cas9♂/+	42	N				7	8	2	2	11	14	13	33
gRNAs♀/+;Cas9♂/+	43	N				7	8	2	2	12	14	13	33
gRNAs♀/+;Cas9♂/+	44	N				7	8	2	2	12	14	14	33
gRNAs♀/+;Cas9♂/+	45	N				7	8.5	2	2	12	17	14	34
gRNAs♀/+;Cas9♂/+	46	N				7	8.5	2	2	16	18	14	34
gRNAs♀/+;Cas9♂/+	47	N				7.5	8.5	2	2	18	18	15	34
gRNAs♀/+;Cas9♂/+	48	N				7.5	8.5	2	2	18	18	15	37
gRNAs♀/+;Cas9♂/+	49	N				7.5	8.5	2	2	20	18	15	39
gRNAs♀/+;Cas9♂/+	50	N				7.5	8.5	2	2	20	18	16	39
gRNAs♂/+;Cas9♀/+	1	Y	26	0	0	5.5	6	1.5	1.5	1	2	1	1
gRNAs♂/+;Cas9♀/+	2	Y	9	0	0	5.5	6	1.5	2	1	3	1	1
gRNAs♂/+;Cas9♀/+	3	Y	0	0		5.5	6.5	2	2	1	3	2	2
gRNAs♂/+;Cas9♀/+	4	Y	15	0	0	6	6.5	2	2	1	3	3	3
gRNAs♂/+;Cas9♀/+	5	Y	83	0	0	6	6.5	2	2	1	4	3	3
gRNAs♂/+;Cas9♀/+	6	Y	40	0	0	6	6.5	2	2	2	4	4	4
gRNAs♂/+;Cas9♀/+	7	Y	14	0	0	6	6.5	2	2	2	4	4	7
gRNAs♂/+;Cas9♀/+	8	Y	21	0	0	6	6.5	2	2	2	4	5	7
gRNAs♂/+;Cas9♀/+	9	Y	42	0	0	6	6.5	2	2	2	4	5	7
gRNAs♂/+;Cas9♀/+	10	Y	2	0	0	6	7	2	2	2	4	5	8
gRNAs♂/+;Cas9♀/+	11	Y	42	0	0	6	7	2	2	3	4	6	8
gRNAs♂/+;Cas9♀/+	12	Y	3	0	0	6	7	2	2	3	5	6	8
gRNAs♂/+;Cas9♀/+	13	Y	46	0	0	6	7	2	2	3	5	6	9
gRNAs♂/+;Cas9♀/+	14	Y	7	0	0	6	7	2	2	3	5	7	10
gRNAs♂/+;Cas9♀/+	15	Y	9	0	0	6	7	2	2	4	5	7	10
gRNAs♂/+;Cas9♀/+	16	Y	61	0	0	6.5	7	2	2	4	5	7	13
gRNAs♂/+;Cas9♀/+	17	Y	1	0	0	6.5	7	2	2	4	5	7	13
gRNAs♂/+;Cas9♀/+	18	Y	100	0	0	6.5	7	2	2	4	5	8	14
gRNAs♂/+;Cas9♀/+	19	Y	16	0	0	6.5	7	2	2	4	5	8	15
gRNAs♂/+;Cas9♀/+	20	Y	19	0	0	6.5	7	2	2	5	5	8	15
gRNAs♂/+;Cas9♀/+	21	Y	72	0	0	6.5	7	2	2	5	5	8	17
gRNAs♂/+;Cas9♀/+	22	Y	0	0		6.5	7	2	2	5	5	9	17
gRNAs♂/+;Cas9♀/+	23	Y	81	0	0	6.5	7	2	2	5	5	9	18
gRNAs♂/+;Cas9♀/+	24	Y	5	0	0	6.5	7	2	2	5	5	9	19
gRNAs♂/+;Cas9♀/+	25	N				6.5	7.5	2	2	5	6	10	19
gRNAs♂/+;Cas9♀/+	26	N				6.5	7.5	2	2	5	6	10	23
gRNAs♂/+;Cas9♀/+	27	N				6.5	7.5	2	2	6	6	10	26
gRNAs♂/+;Cas9♀/+	28	N				6.5	7.5	2	2	6	6	11	26
gRNAs♂/+;Cas9♀/+	29	N				7	7.5	2	2	6	6	11	26
gRNAs♂/+;Cas9♀/+	30	N				7	7.5	2	2	6	6	11	28
gRNAs♂/+;Cas9♀/+	31	N				7	7.5	2	2	6	6	12	28
gRNAs♂/+;Cas9♀/+	32	N				7	7.5	2	2	6	6	12	29
gRNAs♂/+;Cas9♀/+	33	N				7	7.5	2	2	6	6	12	29
gRNAs♂/+;Cas9♀/+	34	N				7	7.5	2	2	6	6	13	30
gRNAs♂/+;Cas9♀/+	35	N				7	7.5	2	2	7	6	13	30
gRNAs♂/+;Cas9♀/+	36	N				7	7.5	2	2	7	6	14	32
gRNAs♂/+;Cas9♀/+	37	N				7	7.5	2	2	7	6	14	32
gRNAs♂/+;Cas9♀/+	38	N				7	7.5	2	2	7	6	14	32
gRNAs♂/+;Cas9♀/+	39	N				7.5	8	2	2	7	6	14	32
gRNAs♂/+;Cas9♀/+	40	N				7.5	8	2	2	7	6	15	34
gRNAs♂/+;Cas9♀/+	41	N				7.5	8	2	2	7	6	15	34
gRNAs♂/+;Cas9♀/+	42	N				7.5	8	2	2	7	7	15	36
gRNAs♂/+;Cas9♀/+	43	N				7.5	8	2	2	7	7	15	36
gRNAs♂/+;Cas9♀/+	44	N				7.5	8	2	2	8	9	16	36
gRNAs♂/+;Cas9♀/+	45	N				7.5	8	2	2	9	10	16	36
gRNAs♂/+;Cas9♀/+	46	N				7.5	8.5	2	2	10	12	17	39
gRNAs♂/+;Cas9♀/+	47	N				7.5	8.5	2	2	14	12	17	39
gRNAs♂/+;Cas9♀/+	48	N				7.5	8.5	2	2	16	15	17	39
gRNAs♂/+;Cas9♀/+	49	N				8	8.5	2	2	17	17	17	39
gRNAs♂/+;Cas9♀/+	50	N				8	8.5	2	2.5	19	18	17	41
gRNAs♂/+;Cas9♀/+	1	Y	62	0	0	5.5	6.5	1.5	1.5	1	1	2	1
gRNAs♂/+;Cas9♀/+	2	Y	52	0	0	5.5	6.5	1.5	1.5	1	1	2	3
gRNAs♂/+;Cas9♀/+	3	Y	78	0	0	5.5	6.5	1.5	1.5	1	2	2	4
gRNAs♂/+;Cas9♀/+	4	Y	96	0	0	5.5	6.5	1.5	1.5	2	2	3	6
gRNAs♂/+;Cas9♀/+	5	Y	53	0	0	5.5	6.5	1.5	2	2	2	3	6
gRNAs♂/+;Cas9♀/+	6	Y	4	0	0	6	6.5	1.5	2	2	3	3	7
gRNAs♂/+;Cas9♀/+	7	Y	24	0	0	6	6.5	2	2	3	3	4	7
gRNAs♂/+;Cas9♀/+	8	Y	0	0		6	6.5	2	2	3	3	4	8
gRNAs♂/+;Cas9♀/+	9	Y	16	0	0	6	6.5	2	2	3	4	5	9
gRNAs♂/+;Cas9♀/+	10	Y	25	0	0	6	6.5	2	2	3	4	6	11
gRNAs♂/+;Cas9♀/+	11	Y	47	0	0	6	6.5	2	2	4	5	6	11
gRNAs♂/+;Cas9♀/+	12	Y	29	0	0	6	6.5	2	2	4	5	7	11
gRNAs♂/+;Cas9♀/+	13	Y	3	0	0	6	6.5	2	2	4	5	7	11
gRNAs♂/+;Cas9♀/+	14	Y	63	0	0	6	7	2	2	4	5	7	14
gRNAs♂/+;Cas9♀/+	15	Y	0	0		6	7	2	2	5	5	8	14
gRNAs♂/+;Cas9♀/+	16	Y	54	0	0	6	7	2	2	5	5	8	14
gRNAs♂/+;Cas9♀/+	17	Y	21	0	0	6	7	2	2	5	5	8	15
gRNAs♂/+;Cas9♀/+	18	Y	48	0	0	6	7	2	2	5	5	8	16
gRNAs♂/+;Cas9♀/+	19	Y	39	0	0	6.5	7	2	2	5	5	8	16
gRNAs♂/+;Cas9♀/+	20	Y	6	0	0	6.5	7	2	2	5	5	9	18
gRNAs♂/+;Cas9♀/+	21	Y	13	0	0	6.5	7	2	2	6	5	9	19
gRNAs♂/+;Cas9♀/+	22	N				6.5	7	2	2	6	5	9	21
gRNAs♂/+;Cas9♀/+	23	N				6.5	7	2	2	6	5	9	21
gRNAs♂/+;Cas9♀/+	24	N				6.5	7	2	2	6	5	10	21
gRNAs♂/+;Cas9♀/+	25	N				6.5	7	2	2	6	5	10	23
gRNAs♂/+;Cas9♀/+	26	N				6.5	7.5	2	2	6	6	10	25
gRNAs♂/+;Cas9♀/+	27	N				6.5	7.5	2	2	6	6	10	28
gRNAs♂/+;Cas9♀/+	28	N				6.5	7.5	2	2	7	6	11	28
gRNAs♂/+;Cas9♀/+	29	N				6.5	7.5	2	2	7	6	11	28
gRNAs♂/+;Cas9♀/+	30	N				6.5	7.5	2	2	7	6	12	29
gRNAs♂/+;Cas9♀/+	31	N				6.5	7.5	2	2	7	6	12	30
gRNAs♂/+;Cas9♀/+	32	N				6.5	7.5	2	2	7	6	12	31
gRNAs♂/+;Cas9♀/+	33	N				7	7.5	2	2	7	6	13	31
gRNAs♂/+;Cas9♀/+	34	N				7	7.5	2	2	7	6	13	31
gRNAs♂/+;Cas9♀/+	35	N				7	7.5	2	2	8	6	13	32
gRNAs♂/+;Cas9♀/+	36	N				7	7.5	2	2	8	6	13	32
gRNAs♂/+;Cas9♀/+	37	N				7	7.5	2	2	8	7	14	34
gRNAs♂/+;Cas9♀/+	38	N				7	8	2	2	8	7	14	34
gRNAs♂/+;Cas9♀/+	39	N				7	8	2	2	9	7	14	34
gRNAs♂/+;Cas9♀/+	40	N				7	8	2	2	9	8	15	35
gRNAs♂/+;Cas9♀/+	41	N				7	8	2	2	10	8	16	36
gRNAs♂/+;Cas9♀/+	42	N				7	8	2	2	10	8	16	36
gRNAs♂/+;Cas9♀/+	43	N				7	8	2	2	11	11	16	38
gRNAs♂/+;Cas9♀/+	44	N				7	8	2	2	12	11	16	38
gRNAs♂/+;Cas9♀/+	45	N				7.5	8	2	2	14	13	16	38
gRNAs♂/+;Cas9♀/+	46	N				7.5	8	2	2	14	14	16	39
gRNAs♂/+;Cas9♀/+	47	N				7.5	8.5	2	2	15	15	16	39
gRNAs♂/+;Cas9♀/+	48	N				7.5	8.5	2	2	16	15	17	39
gRNAs♂/+;Cas9♀/+	49	N				7.5	8.5	2	2	16	16	17	40
gRNAs♂/+;Cas9♀/+	50	N				7.5	8.5	2	2	18	16	18	40
gRNAs♂/+;Cas9♀/+	1	Y	7	0	0	5.5	6.5	1.5	1.5	1	2	2	3
gRNAs♂/+;Cas9♀/+	2	Y	15	0	0	5.5	6.5	1.5	1.5	1	2	3	3
gRNAs♂/+;Cas9♀/+	3	Y	23	0	0	5.5	6.5	1.5	1.5	2	3	3	4
gRNAs♂/+;Cas9♀/+	4	Y	14	0	0	5.5	6.5	2	2	2	3	4	5
gRNAs♂/+;Cas9♀/+	5	Y	0	0		6	6.5	2	2	2	3	4	8
gRNAs♂/+;Cas9♀/+	6	Y	36	0	0	6	6.5	2	2	3	3	5	8
gRNAs♂/+;Cas9♀/+	7	Y	62	0	0	6	6.5	2	2	3	4	5	12
gRNAs♂/+;Cas9♀/+	8	Y	2	0	0	6	7	2	2	3	4	5	12
gRNAs♂/+;Cas9♀/+	9	Y	6	0	0	6	7	2	2	4	4	5	12
gRNAs♂/+;Cas9♀/+	10	Y	14	0	0	6	7	2	2	4	4	6	13
gRNAs♂/+;Cas9♀/+	11	Y	52	0	0	6	7	2	2	4	4	6	13
gRNAs♂/+;Cas9♀/+	12	Y	13	0	0	6	7	2	2	4	4	7	14
gRNAs♂/+;Cas9♀/+	13	Y	15	0	0	6	7	2	2	4	5	7	15
gRNAs♂/+;Cas9♀/+	14	Y	22	0	0	6	7	2	2	4	5	8	15
gRNAs♂/+;Cas9♀/+	15	Y	64	0	0	6	7	2	2	5	5	8	15
gRNAs♂/+;Cas9♀/+	16	Y	27	0	0	6	7	2	2	5	5	8	16
gRNAs♂/+;Cas9♀/+	17	Y	94	0	0	6	7	2	2	5	5	8	16
gRNAs♂/+;Cas9♀/+	18	Y	0	0		6	7	2	2	5	5	8	19
gRNAs♂/+;Cas9♀/+	19	Y	14	0	0	6.5	7	2	2	5	5	8	23
gRNAs♂/+;Cas9♀/+	20	N				6.5	7	2	2	5	5	8	4
gRNAs♂/+;Cas9♀/+	21	N				6.5	7	2	2	5	5	8	25
gRNAs♂/+;Cas9♀/+	22	N				6.5	7	2	2	5	6	9	25
gRNAs♂/+;Cas9♀/+	23	N				6.5	7.5	2	2	5	6	9	25
gRNAs♂/+;Cas9♀/+	24	N				6.5	7.5	2	2	6	6	9	25
gRNAs♂/+;Cas9♀/+	25	N				6.5	7.5	2	2	6	6	9	25
gRNAs♂/+;Cas9♀/+	26	N				6.5	7.5	2	2	6	6	10	26
gRNAs♂/+;Cas9♀/+	27	N				6.5	7.5	2	2	6	6	10	27
gRNAs♂/+;Cas9♀/+	28	N				6.5	7.5	2	2	6	6	11	27
gRNAs♂/+;Cas9♀/+	29	N				6.5	7.5	2	2	6	6	11	27
gRNAs♂/+;Cas9♀/+	30	N				7	7.5	2	2	6	6	11	27
gRNAs♂/+;Cas9♀/+	31	N				7	7.5	2	2	7	6	11	27
gRNAs♂/+;Cas9♀/+	32	N				7	7.5	2	2	7	6	12	27
gRNAs♂/+;Cas9♀/+	33	N				7	7.5	2	2	7	7	12	27
gRNAs♂/+;Cas9♀/+	34	N				7	7.5	2	2	7	7	12	27
gRNAs♂/+;Cas9♀/+	35	N				7	7.5	2	2	7	7	12	27
gRNAs♂/+;Cas9♀/+	36	N				7	7.5	2	2	7	7	13	29
gRNAs♂/+;Cas9♀/+	37	N				7	7.5	2	2	7	8	13	30
gRNAs♂/+;Cas9♀/+	38	N				7	7.5	2	2	8	9	14	30
gRNAs♂/+;Cas9♀/+	39	N				7	8	2	2	8	9	14	30
gRNAs♂/+;Cas9♀/+	40	N				7	8	2	2	8	9	15	30
gRNAs♂/+;Cas9♀/+	41	N				7.5	8	2	2	9	9	15	30
gRNAs♂/+;Cas9♀/+	42	N				7.5	8	2	2	9	10	15	30
gRNAs♂/+;Cas9♀/+	43	N				7.5	8	2	2	10	10	16	35
gRNAs♂/+;Cas9♀/+	44	N				7.5	8	2	2	11	12	16	35
gRNAs♂/+;Cas9♀/+	45	N				7.5	8.5	2	2	13	14	16	35
gRNAs♂/+;Cas9♀/+	46	N				7.5	8.5	2	2	14	14	17	35
gRNAs♂/+;Cas9♀/+	47	N				7.5	8.5	2	2	16	16	17	36
gRNAs♂/+;Cas9♀/+	48	N				7.5	8.5	2	2	17	18	17	38
gRNAs♂/+;Cas9♀/+	49	N				7.5	8.5	2	2	17	19	17	39
gRNAs♂/+;Cas9♀/+	50	N				7.5	8.5	2	2	17	22	17	39

## Sheet: (B) ♂ insemination capacity
Test group	♀ # inseminated by a single ♂
WT	4
WT	5
WT	3
WT	5
WT	5
WT	3
WT	4
WT	6
WT	4
WT	3
WT	5
WT	5
WT	3
WT	3
WT	3
WT	3
WT	3
WT	4
WT	2
WT	4
WT	5
WT	3
WT	4
WT	3
WT	5
WT	5
WT	3
WT	4
WT	4
WT	4
Cas9/Cas9	6
Cas9/Cas9	2
Cas9/Cas9	4
Cas9/Cas9	5
Cas9/Cas9	3
Cas9/Cas9	4
Cas9/Cas9	4
Cas9/Cas9	3
Cas9/Cas9	4
Cas9/Cas9	4
Cas9/Cas9	5
Cas9/Cas9	5
Cas9/Cas9	5
Cas9/Cas9	3
Cas9/Cas9	3
Cas9/Cas9	4
Cas9/Cas9	3
Cas9/Cas9	4
Cas9/Cas9	3
Cas9/Cas9	4
Cas9/Cas9	4
Cas9/Cas9	5
Cas9/Cas9	5
Cas9/Cas9	3
Cas9/Cas9	2
Cas9/Cas9	3
Cas9/Cas9	3
Cas9/Cas9	5
Cas9/Cas9	5
Cas9/Cas9	2
gRNAs/gRNAs	3
gRNAs/gRNAs	2
gRNAs/gRNAs	4
gRNAs/gRNAs	4
gRNAs/gRNAs	4
gRNAs/gRNAs	3
gRNAs/gRNAs	5
gRNAs/gRNAs	4
gRNAs/gRNAs	4
gRNAs/gRNAs	3
gRNAs/gRNAs	5
gRNAs/gRNAs	5
gRNAs/gRNAs	4
gRNAs/gRNAs	3
gRNAs/gRNAs	3
gRNAs/gRNAs	3
gRNAs/gRNAs	3
gRNAs/gRNAs	4
gRNAs/gRNAs	4
gRNAs/gRNAs	3
gRNAs/gRNAs	4
gRNAs/gRNAs	5
gRNAs/gRNAs	5
gRNAs/gRNAs	5
gRNAs/gRNAs	4
gRNAs/gRNAs	3
gRNAs/gRNAs	3
gRNAs/gRNAs	5
gRNAs/gRNAs	4
gRNAs/gRNAs	3
gRNAs♀/+;Cas9♂/+	3
gRNAs♀/+;Cas9♂/+	1
gRNAs♀/+;Cas9♂/+	6
gRNAs♀/+;Cas9♂/+	5
gRNAs♀/+;Cas9♂/+	4
gRNAs♀/+;Cas9♂/+	5
gRNAs♀/+;Cas9♂/+	3
gRNAs♀/+;Cas9♂/+	4
gRNAs♀/+;Cas9♂/+	4
gRNAs♀/+;Cas9♂/+	2
gRNAs♀/+;Cas9♂/+	4
gRNAs♀/+;Cas9♂/+	4
gRNAs♀/+;Cas9♂/+	4
gRNAs♀/+;Cas9♂/+	4
gRNAs♀/+;Cas9♂/+	5
gRNAs♀/+;Cas9♂/+	3
gRNAs♀/+;Cas9♂/+	5
gRNAs♀/+;Cas9♂/+	3
gRNAs♀/+;Cas9♂/+	2
gRNAs♀/+;Cas9♂/+	4
gRNAs♀/+;Cas9♂/+	5
gRNAs♀/+;Cas9♂/+	5
gRNAs♀/+;Cas9♂/+	2
gRNAs♀/+;Cas9♂/+	3
gRNAs♀/+;Cas9♂/+	5
gRNAs♀/+;Cas9♂/+	1
gRNAs♀/+;Cas9♂/+	5
gRNAs♀/+;Cas9♂/+	1
gRNAs♀/+;Cas9♂/+	5
gRNAs♀/+;Cas9♂/+	5
gRNAs♂/+;Cas9♀/+	4
gRNAs♂/+;Cas9♀/+	2
gRNAs♂/+;Cas9♀/+	4
gRNAs♂/+;Cas9♀/+	5
gRNAs♂/+;Cas9♀/+	3
gRNAs♂/+;Cas9♀/+	6
gRNAs♂/+;Cas9♀/+	4
gRNAs♂/+;Cas9♀/+	3
gRNAs♂/+;Cas9♀/+	4
gRNAs♂/+;Cas9♀/+	4
gRNAs♂/+;Cas9♀/+	2
gRNAs♂/+;Cas9♀/+	4
gRNAs♂/+;Cas9♀/+	3
gRNAs♂/+;Cas9♀/+	4
gRNAs♂/+;Cas9♀/+	5
gRNAs♂/+;Cas9♀/+	5
gRNAs♂/+;Cas9♀/+	4
gRNAs♂/+;Cas9♀/+	4
gRNAs♂/+;Cas9♀/+	3
gRNAs♂/+;Cas9♀/+	4
gRNAs♂/+;Cas9♀/+	6
gRNAs♂/+;Cas9♀/+	2
gRNAs♂/+;Cas9♀/+	4
gRNAs♂/+;Cas9♀/+	5
gRNAs♂/+;Cas9♀/+	4
gRNAs♂/+;Cas9♀/+	2
gRNAs♂/+;Cas9♀/+	3
gRNAs♂/+;Cas9♀/+	4
gRNAs♂/+;Cas9♀/+	5
gRNAs♂/+;Cas9♀/+	3

## Sheet: (C) Fertility, Blood Fed and Lo
Adult Survival (Females co-habiting with males)				Adult Survival (Females only)				Adult Longevity (Males co-habiting with females)				Adult Longevity (Males only)
Log-rank (Mantel-Cox) test				Log-rank (Mantel-Cox) test				Log-rank (Mantel-Cox) test				Log-rank (Mantel-Cox) test
All comparisons	Chi square	762.8		All comparisons	Chi square	701.4		All comparisons	Chi square	6.019		All comparisons	Chi square	3.681
	df	4			df	4			df	4			df	4
	P value	<0.0001			P value	<0.0001			mean [wt]	10			mean [wt]	26
	Significant	Yes			Significant	Yes			mean [Cas9/Cas9]	10			mean [Cas9/Cas9]	23
wt vs Cas9/Cas9	Chi square	3.854		wt vs Cas9/Cas9	Chi square	1.908			mean [gRNA/gRNA]	10			mean [gRNA/gRNA]	26.5
	df	1			df	1			mean [gRNAs♀/Cas9♂]	10			mean [gRNAs♀/Cas9♂]	27
	mean [wt]	47			mean [wt]	44			mean [gRNAs♂/Cas9♀]	10			mean [gRNAs♂/Cas9♀]	25
	mean [Cas9/Cas9]	38.5			mean [Cas9/Cas9]	37.5			P value	0.1977			P value	0.4509
	P value	0.0496			P value	0.1672			Significant	No			Significant	No
	Significant	No			Significant	No
wt vs gRNAs/gRNAs	Chi square	2.433		wt vs gRNAs/gRNAs	Chi square	2.994
	df	1			df	1
	mean [wt]	47			mean [wt]	44
	mean [gRNA/gRNA]				mean [gRNA/gRNA]	37.5
	P value	0.1181			P value	0.0862
	Significant	No			Significant	No
wt vs gRNAs♀/Cas9♂	Chi square	266.3		wt vs gRNAs♀/Cas9♂	Chi square	269.7
	df	1			df	1
	mean [wt]	47			mean [wt]	44
	mean [gRNAs♀/Cas9♂]	6			mean [gRNAs♀/Cas9♂]	6.5
	P value	<0.0001			P value	<0.0001
	Significant	Yes			Significant	Yes
wt vs gRNAs♂/Cas9♀	Chi square	275.5		wt vs gRNAs♂/Cas9♀	Chi square	279.9
	df	1			df	1
	mean [wt]	47			mean [wt]	44
	mean [gRNAs♂/Cas9♀]	6			mean [gRNAs♂/Cas9♀]	6
	P value	<0.0001			P value	<0.0001
	Significant	Yes			Significant	Yes
Bonferroni corrected significance threshold	0.0125
Signifcance level	0.05
Comparisons	4
Larva-to-pupa ♀ Development Time				Larva-to-pupa ♂ Development Time				Pupa-to-adult ♀ Development Time				Pupa-to-adult ♂ Development Time
Unpaired two tailed t-test				Unpaired two tailed t-test				Unpaired two tailed t-test				Unpaired two tailed t-test
wt vs Cas9/Cas9	t statistic	8.094		wt vs Cas9/Cas9	t statistic	11.77		wt vs Cas9/Cas9	t statistic	1.13		wt vs Cas9/Cas9	t statistic	0.6771
	df	298			df	298			df	298			df	298
	mean [wt]	5.943			mean [wt]	6.727			mean [wt]	1.957			mean [wt]	1.97
	mean [Cas9/Cas9]	6.483			mean [Cas9/Cas9]	7.51			mean [Cas9/Cas9]	1.973			mean [Cas9/Cas9]	1.96
	P value	<0.000001			P value	<0.000001			P value	0.17464			P value	0.251993
	Adjusted P value*	<0.000001			Adjusted P value*	<0.000001			Adjusted P value*	>0.999999			Adjusted P value*	>0.999999
	Significant	Yes			Significant	Yes			Significant	No			Significant	No
wt vs gRNAs/gRNAs	t statistic	10.64		wt vs gRNAs/gRNAs	t statistic	11.11		wt vs gRNAs/gRNAs	t statistic	0.6493		wt vs gRNAs/gRNAs	t statistic	0.2489
	df	298			df	298			df	298			df	298
	mean [wt]	5.943			mean [wt]	6.727			mean [wt]	1.957			mean [wt]	1.97
	mean [gRNA/gRNA]	6.61			mean [gRNA/gRNA]	7.443			mean [gRNA/gRNA]	1.967			mean [gRNA/gRNA]	1.973
	P value	<0.000001			P value	<0.000001			P value	0.347882			P value	0.40582
	Adjusted P value*	<0.000001			Adjusted P value*	<0.000001			Adjusted P value*	>0.999999			Adjusted P value*	>0.999999
	Significant	Yes			Significant	Yes			Significant	No			Significant	No
wt vs gRNAs♀/Cas9♂	t statistic	11.66		wt vs gRNAs♀/Cas9♂	t statistic	13.54		wt vs gRNAs♀/Cas9♂	t statistic	0.8841		wt vs gRNAs♀/Cas9♂	t statistic	0
	df	298			df	298			df	298			df	298
	mean [wt]	5.943			mean [wt]	6.727			mean [wt]	1.957			mean [wt]	1.97
	mean [gRNAs♀/Cas9♂]	6.64			mean [gRNAs♀/Cas9♂]	7.543			mean [gRNAs♀/Cas9♂]	1.97			mean [gRNAs♀/Cas9♂]	1.97
	P value	<0.000001			P value	<0.000001			P value	0.254084			P value	0.505
	Adjusted P value*	<0.000001			Adjusted P value*	<0.000001			Adjusted P value*	>0.999999			Adjusted P value*	>0.999999
	Significant	Yes			Significant	Yes			Significant	No			Significant	No
wt vs gRNAs♂/Cas9♀	t statistic	9.374		wt vs gRNAs♂/Cas9♀	t statistic	8.867		wt vs gRNAs♂/Cas9♀	t statistic	0.4243		wt vs gRNAs♂/Cas9♀	t statistic	0.4816
	df	298			df	298			df	298			df	198
	mean [wt]	5.943			mean [wt]	6.727			mean [wt]	1.957			mean [wt]	1.97
	mean [gRNAs♂/Cas9♀]	6.593			mean [gRNAs♂/Cas9♀]	7.333			mean [gRNAs♂/Cas9♀]				mean [gRNAs♂/Cas9♀]	1.977
	P value	<0.000001			P value	<0.000001			P value	0.671627			P value	0.630467
	Adjusted P value*	<0.000001			Adjusted P value*	<0.000001			Adjusted P value*	>0.999999			Adjusted P value*	>0.999999
	Significant	Yes			Significant	Yes			Significant	No			Significant	No
*Corrected for multiple comparisons by Bonferroni-Dunn
Female blood feeding
Unpaired two tailed t-test
wt vs Cas9/Cas9	t statistic	N/A
	df	298
wt vs gRNAs/gRNAs	t statistic	N/A
	df	298
wt vs gRNAs♀/Cas9♂	t statistic	18.35
	df	298
	P value	<0.0001
	Significant	Yes
wt vs gRNAs♂/Cas9♀	t statistic	14.15
	df	298
	P value	<0.0001
	Significant	Yes

## Sheet: (D) Insemination Capacity Stati
Unpaired two-sided t-test
wt vs Cas9/Cas9	t-statistic	0.2563
	df	58
	mean [wt]	3.9
	mean [Cas9/Cas9]	3.833
	P value	0.7986
	Significant	No
wt vs gRNAs/gRNAs	t-statistic	0.428
	df	58
	mean [wt]	3.9
	mean [gRNA/gRNA]	3.8
	P value	0.6703
	Significant	No
wt vs gRNAs♀/Cas9♂	t-statistic	0.541
	df	58
	mean [wt]	3.9
	mean [gRNAs♀/Cas9♂]	3.733
	P value	0.5906
	Significant	No
wt vs gRNAs♂/Cas9♀	t-statistic	0.252
	df	58
	mean [wt]	3.9
	mean [gRNAs♂/Cas9♀]	3.833
	P value	0.8019
	Significant	No
