# Supplementary material for: Eliminating Mosquitoes with Precision Guided Sterile Males
Source: Research Square preprint supplement (doi:10.21203/rs.3.rs-367110/v1), 2021-04-05
Supplement: Supplementary file 14 [file Table S6 - pgSIT_Female_Flight acitivity.xlsx]

## Sheet: DAM Assay Results
	Table S9 - pgSIT Flight Capacity Assay
	WT Females
	Time	Replicate	Tub-1	Tub-2	Tub-3	Tub-4	Tub-5	Tub-6	Tub-7	Tub-8	Tub-9	Tub-10	Tub-11	Tub-12	Tub-13	Tub-14	Tub-15	Tub-16	Tub-17	Tub-18	Tub-19	Tub-20	Tub-21	Tub-22	Tub-23	Tub-24
	07:00:00	ZT0	25	0	3	22	11	2	19	0	3	6	14	0	0	3	0	11	6	1	31	0	23	11	0	4
	08:00:00	ZT1	0	14	0	16	6	23	0	0	3	0	13	14	0	0	0	13	0	2	12	3	11	0	0	16
	09:00:00	ZT2	0	0	8	0	19	17	0	7	13	0	0	21	11	0	0	2	0	11	8	14	8	3	0	22
	10:00:00	ZT3	0	42	0	0	0	0	0	13	14	37	0	13	0	14	0	0	13	19	0	0	11	0	0	0
	11:00:00	ZT4	1	0	0	0	0	0	0	0	0	0	6	15	19	0	19	0	3	6	0	0	0	4	0	0
	12:00:00	ZT5	1	0	0	0	0	0	0	0	0	3	0	0	7	0	0	7	0	0	0	0	0	13	0	0
	13:00:00	ZT6	0	0	0	0	0	0	0	0	0	0	0	0	15	0	0	0	0	0	0	0	0	13	5	0
	14:00:00	ZT7	0	0	0	0	8	0	0	0	0	0	0	0	0	0	0	0	0	0	0	0	0	0	0	0
	15:00:00	ZT8	0	0	0	0	0	0	0	0	3	0	0	0	0	0	8	0	0	13	0	0	9	0	0	0
	16:00:00	ZT9	0	0	0	0	0	0	43	38	0	9	43	0	0	31	6	0	0	0	7	12	0	0	0	0
	17:00:00	ZT10	0	0	0	23	23	0	11	16	15	0	0	0	0	0	31	0	8	0	0	17	26	0	29	14
	18:00:00	ZT11	32	0	21	4	0	25	39	6	30	24	0	26	0	22	12	0	0	0	11	9	31	0	0	39
	19:00:00	ZT12	0	35	11	7	0	12	16	14	31	0	0	11	4	18	0	9	0	7	5	21	7	0	0	17
	20:00:00	ZT13	7	22	0	0	3	53	33	0	35	21	6	4	0	15	17	27	9	0	0	39	30	11	14	13
	21:00:00	ZT14	6	8	0	0	21	0	21	0	22	0	0	0	0	0	0	0	0	21	0	0	32	28	7	0
	22:00:00	ZT15	3	0	0	31	0	0	0	0	0	0	0	0	0	0	0	0	0	0	0	0	9	6	11	0
	23:00:00	ZT16	4	0	0	1	0	0	0	0	0	0	0	0	0	0	0	0	0	0	0	0	4	0	0	0
	00:00:00	ZT17	7	0	0	7	0	0	0	0	0	0	0	0	0	0	0	0	0	0	0	0	0	0	0	0
	01:00:00	ZT18	0	0	0	4	0	0	0	0	0	0	0	4	1	0	0	0	0	0	0	0	0	0	0	0
	02:00:00	ZT19	1	0	0	0	0	9	5	0	0	0	5	19	4	33	0	3	0	0	0	0	0	0	0	0
	03:00:00	ZT20	0	0	9	0	12	16	6	50	0	13	1	6	1	40	0	13	23	0	0	0	6	22	0	0
	04:00:00	ZT21	6	0	31	8	19	29	4	41	14	16	0	23	3	0	15	8	12	13	0	13	17	17	3	14
	05:00:00	ZT22	3	0	7	24	13	11	14	0	12	0	0	33	0	0	6	0	11	9	21	7	25	14	0	16
	06:00:00	ZT23	39	16	16	11	22	0	29	7	0	13	22	29	7	16	1	5	13	5	8	2	21	21	7	31
	-	sum	135	137	106	158	157	197	240	192	195	142	110	218	72	192	115	98	98	107	103	137	270	163	76	186
	pgSIT Flightless Females
	Time	Replicate	Tub-1	Tub-2	Tub-3	Tub-4	Tub-5	Tub-6	Tub-7	Tub-8	Tub-9	Tub-10	Tub-11	Tub-12	Tub-13	Tub-14	Tub-15	Tub-16	Tub-17	Tub-18	Tub-19	Tub-20	Tub-21	Tub-22	Tub-23	Tub-24
	07:00:00	ZT0	0	0	0	0	0	0	0	0	0	0	0	0	0	0	0	0	0	0	0	0	0	0	0	0
	08:00:00	ZT1	0	0	0	0	0	0	0	0	0	0	0	0	0	0	0	0	0	0	0	0	0	0	0	0
	09:00:00	ZT2	0	0	0	0	0	0	0	0	0	0	0	0	0	0	0	0	0	0	0	0	0	0	0	0
	10:00:00	ZT3	0	0	0	0	0	0	0	0	0	0	0	0	0	0	0	0	0	0	0	0	0	0	0	0
	11:00:00	ZT4	0	0	0	0	0	0	0	0	0	0	0	0	0	0	0	0	0	0	0	0	0	0	0	0
	12:00:00	ZT5	0	0	0	0	0	0	0	0	0	0	0	0	0	0	0	0	0	0	0	0	0	0	0	0
	13:00:00	ZT6	0	0	0	0	0	0	0	0	0	0	0	0	0	0	0	0	0	0	0	0	0	0	0	0
	14:00:00	ZT7	0	0	0	0	0	0	0	0	0	0	0	0	0	0	0	0	0	0	0	0	0	0	0	0
	15:00:00	ZT8	0	0	0	0	0	0	0	0	0	0	0	0	0	0	0	0	0	0	0	0	0	0	0	0
	16:00:00	ZT9	0	0	0	0	0	0	0	0	0	0	0	0	0	0	0	0	0	0	0	0	0	0	0	0
	17:00:00	ZT10	0	0	0	0	0	0	0	0	0	0	0	0	0	0	0	0	0	0	0	0	0	0	0	0
	18:00:00	ZT11	0	0	0	0	0	0	0	0	0	0	0	0	0	0	0	0	0	0	0	0	0	0	0	0
	19:00:00	ZT12	0	0	0	0	0	0	0	0	0	0	0	0	0	0	0	0	0	0	0	0	0	0	0	0
	20:00:00	ZT13	0	0	0	0	0	0	0	0	0	0	0	0	0	0	0	0	0	0	0	0	0	0	0	0
	21:00:00	ZT14	0	0	0	0	0	0	0	0	0	0	0	0	0	0	0	0	0	0	0	0	0	0	0	0
	22:00:00	ZT15	0	0	0	0	0	0	0	0	0	0	0	0	0	0	0	0	0	0	0	0	0	0	0	0
	23:00:00	ZT16	0	0	0	0	0	0	0	0	0	0	0	0	0	0	0	0	0	0	0	0	0	0	0	0
	00:00:00	ZT17	0	0	0	0	0	0	0	0	0	0	0	0	0	0	0	0	0	0	0	0	0	0	0	0
	01:00:00	ZT18	0	0	0	0	0	0	0	0	0	0	0	0	0	0	0	0	0	0	0	0	0	0	0	0
	02:00:00	ZT19	0	0	0	0	0	0	0	0	0	0	0	0	0	0	0	0	0	0	0	0	0	0	0	0
	03:00:00	ZT20	0	0	0	0	0	0	0	0	0	0	0	0	0	0	0	0	0	0	0	0	0	0	0	0
	04:00:00	ZT21	0	0	0	0	0	0	0	0	0	0	0	0	0	0	0	0	0	0	0	0	0	0	0	0
	05:00:00	ZT22	0	0	0	0	0	0	0	0	0	0	0	0	0	0	0	0	0	0	0	0	0	0	0	0
	06:00:00	ZT23	0	0	0	0	0	0	0	0	0	0	0	0	0	0	0	0	0	0	0	0	0	0	0	0
	-	sum	0	0	0	0	0	0	0	0	0	0	0	0	0	0	0	0	0	0	0	0	0	0	0	0
	WT Males
	Time	Replicate	Tub-1	Tub-2	Tub-3	Tub-4	Tub-5	Tub-6	Tub-7	Tub-8	Tub-9	Tub-10	Tub-11	Tub-12	Tub-13	Tub-14	Tub-15	Tub-16	Tub-17	Tub-18	Tub-19	Tub-20	Tub-21	Tub-22	Tub-23	Tub-24
	07:00:00	ZT0	19	7	9	25	0	21	7	5	14	7	3	12	13	22	1	9	10	17	0	2	41	0	14	18
	08:00:00	ZT1	0	14	3	0	0	13	11	8	23	13	6	4	7	31	0	4	2	13	0	5	11	17	0	21
	09:00:00	ZT2	0	15	10	6	16	0	1	11	18	6	8	3	21	15	6	9	4	36	0	29	28	0	0	7
	10:00:00	ZT3	0	0	0	4	6	7	0	3	24	9	5	4	20	7	0	12	7	8	0	0	9	0	37	33
	11:00:00	ZT4	0	5	2	7	2	1	0	8	8	7	9	22	13	6	20	5	14	0	0	2	12	8	11	2
	12:00:00	ZT5	0	16	0	4	2	1	0	8	13	20	11	5	6	17	0	14	13	13	59	0	1	16	2	1
	13:00:00	ZT6	5	13	10	12	6	6	12	4	15	11	2	4	13	5	2	13	0	14	0	4	6	19	1	6
	14:00:00	ZT7	19	14	8	16	2	2	0	17	6	25	4	11	5	0	24	13	0	10	6	7	21	26	3	0
	15:00:00	ZT8	0	11	13	2	7	0	0	5	14	28	9	5	7	4	13	8	0	8	0	56	17	16	4	9
	16:00:00	ZT9	20	18	4	9	4	5	19	12	12	26	3	11	8	21	2	18	2	16	0	6	14	34	0	30
	17:00:00	ZT10	9	11	6	14	14	4	30	7	26	10	21	4	7	46	16	10	0	27	0	58	18	0	7	13
	18:00:00	ZT11	0	24	9	11	20	5	12	15	22	34	27	6	22	4	2	18	0	10	8	37	10	5	52	24
	19:00:00	ZT12	31	22	26	6	19	39	6	13	16	14	19	10	19	0	16	14	1	16	7	36	16	0	16	36
	20:00:00	ZT13	0	32	2	27	16	11	8	4	15	28	2	54	8	0	3	7	1	13	0	11	46	28	30	19
	21:00:00	ZT14	40	14	15	31	11	32	7	16	40	8	11	27	1	1	11	20	0	12	4	10	16	3	12	5
	22:00:00	ZT15	5	15	5	26	7	14	0	14	14	14	4	4	10	0	2	10	5	13	6	3	13	11	7	1
	23:00:00	ZT16	35	7	10	17	5	0	0	7	3	31	8	13	29	19	5	23	0	10	0	17	10	0	15	0
	00:00:00	ZT17	0	28	13	17	2	0	0	8	2	25	5	16	22	13	8	16	0	8	8	9	0	39	27	0
	01:00:00	ZT18	0	2	16	12	0	0	3	8	1	32	4	6	4	7	21	15	0	12	0	51	34	15	31	0
	02:00:00	ZT19	0	6	3	15	35	9	6	11	14	12	5	6	16	4	4	22	0	6	2	5	9	2	3	0
	03:00:00	ZT20	0	9	38	4	27	16	4	15	26	15	2	8	11	15	8	8	19	40	4	3	2	25	8	24
	04:00:00	ZT21	0	19	5	19	12	13	15	14	8	33	13	8	13	32	4	15	22	8	4	57	16	1	29	15
	05:00:00	ZT22	11	19	4	30	32	3	21	15	16	12	19	18	2	40	10	18	17	3	10	21	13	2	30	33
	06:00:00	ZT23	29	14	4	4	28	18	6	13	17	21	7	16	10	37	6	16	0	36	2	40	13	19	16	41
	-	sum	223	335	215	318	273	220	168	241	367	441	207	277	287	346	184	317	117	349	120	469	376	286	355	338
	pgSIT Males
	Time	Replicate	Tub-1	Tub-2	Tub-3	Tub-4	Tub-5	Tub-6	Tub-7	Tub-8	Tub-9	Tub-10	Tub-11	Tub-12	Tub-13	Tub-14	Tub-15	Tub-16	Tub-17	Tub-18	Tub-19	Tub-20	Tub-21	Tub-22	Tub-23	Tub-24
	07:00:00	ZT0	18	5	21	0	19	7	6	3	2	0	9	6	23	31	7	18	0	6	0	6	21	4	18	19
	08:00:00	ZT1	5	1	16	21	3	7	13	15	4	16	12	1	3	15	14	9	3	6	23	12	3	18	2	16
	09:00:00	ZT2	6	0	24	5	0	4	46	1	3	1	12	0	17	43	1	24	3	0	4	12	7	35	0	0
	10:00:00	ZT3	11	0	33	6	3	14	22	3	0	8	1	8	2	37	0	3	6	2	3	0	0	4	1	5
	11:00:00	ZT4	0	6	11	3	15	17	0	6	0	2	6	23	1	11	6	2	2	1	0	2	1	9	11	0
	12:00:00	ZT5	0	4	7	1	19	31	11	16	0	7	0	16	8	0	13	7	5	9	0	1	0	7	6	15
	13:00:00	ZT6	5	0	1	2	21	6	5	1	0	5	0	7	4	1	15	3	0	3	17	0	13	0	31	1
	14:00:00	ZT7	0	0	2	0	6	15	7	6	0	1	3	11	0	2	24	0	0	0	12	2	12	0	22	7
	15:00:00	ZT8	21	3	2	9	3	7	16	24	0	0	16	19	0	13	31	0	1	0	3	4	1	0	6	19
	16:00:00	ZT9	20	14	14	7	0	2	3	13	0	23	28	3	22	32	15	32	8	0	31	14	6	0	13	22
	17:00:00	ZT10	19	22	35	4	46	25	20	31	8	14	13	28	13	57	24	15	9	17	7	21	19	11	7	51
	18:00:00	ZT11	10	31	19	3	31	12	37	32	2	49	6	14	27	19	31	37	26	19	15	7	22	32	20	32
	19:00:00	ZT12	42	19	4	11	28	37	29	42	1	32	12	10	41	24	6	21	9	25	6	19	3	27	42	24
	20:00:00	ZT13	15	14	41	8	33	14	41	51	12	3	2	7	19	18	7	4	17	11	8	19	16	0	3	9
	21:00:00	ZT14	22	38	3	6	29	8	13	22	6	27	1	18	8	3	19	12	8	4	29	36	4	0	21	32
	22:00:00	ZT15	26	7	13	2	16	19	0	8	0	16	11	3	13	6	24	8	6	1	21	7	8	3	2	13
	23:00:00	ZT16	11	0	1	1	7	13	0	26	5	8	0	6	26	12	3	4	15	7	5	3	22	4	36	7
	00:00:00	ZT17	0	0	17	5	8	3	0	39	2	19	7	1	0	1	9	0	6	13	5	24	31	1	17	19
	01:00:00	ZT18	0	6	7	9	13	0	3	15	8	29	33	0	0	17	1	0	3	2	1	6	15	9	0	9
	02:00:00	ZT19	0	1	0	3	11	7	1	9	4	11	19	5	35	15	28	10	12	19	14	21	37	15	0	3
	03:00:00	ZT20	1	4	8	1	20	11	22	8	4	7	20	2	13	22	0	11	14	13	3	22	19	12	1	26
	04:00:00	ZT21	7	18	8	0	32	9	13	39	7	9	11	13	41	30	0	22	6	6	7	8	0	0	2	13
	05:00:00	ZT22	3	37	20	20	15	5	19	24	11	18	18	7	39	37	24	43	7	3	10	14	0	27	3	31
	06:00:00	ZT23	32	14	31	13	22	7	30	41	27	42	26	19	32	40	39	19	45	7	31	40	42	31	14	22
	-	sum	274	244	338	140	400	280	357	475	106	347	266	227	387	486	341	304	211	174	255	300	302	249	278	395
	WT Wingless Females with Wings Surgically Removed
	Time	Replicate	Tub-1	Tub-2	Tub-3	Tub-4	Tub-5	Tub-6	Tub-7	Tub-8	Tub-9	Tub-10	Tub-11	Tub-12	Tub-13	Tub-14	Tub-15	Tub-16	Tub-17	Tub-18	Tub-19	Tub-20	Tub-21	Tub-22	Tub-23	Tub-24
	07:00:00	ZT0	0	0	0	0	0	0	0	0	0	0	0	0	0	0	0	0	0	0	0	0	0	0	0	0
	08:00:00	ZT1	0	0	0	0	0	0	0	0	0	0	0	0	0	0	0	0	0	0	0	0	0	0	0	0
	09:00:00	ZT2	0	0	0	0	0	0	0	0	0	0	0	0	0	0	0	0	0	0	0	0	0	0	0	0
	10:00:00	ZT3	0	0	0	0	0	0	0	0	0	0	0	0	0	0	0	0	0	0	0	0	0	0	0	0
	11:00:00	ZT4	0	0	0	0	0	0	0	0	0	0	0	0	0	0	0	0	0	0	0	0	0	0	0	0
	12:00:00	ZT5	0	0	0	0	0	0	0	0	0	0	0	0	0	0	0	0	0	0	0	0	0	0	0	0
	13:00:00	ZT6	0	0	0	0	0	0	0	0	0	0	0	0	0	0	0	0	0	0	0	0	0	0	0	0
	14:00:00	ZT7	0	0	0	0	0	0	0	0	0	0	0	0	0	0	0	0	0	0	0	0	0	0	0	0
	15:00:00	ZT8	0	0	0	0	0	0	0	0	0	0	0	0	0	0	0	0	0	0	0	0	0	0	0	0
	16:00:00	ZT9	0	0	0	0	0	0	0	0	0	0	0	0	0	0	0	0	0	0	0	0	0	0	0	0
	17:00:00	ZT10	0	0	0	0	0	0	0	0	0	0	0	0	0	0	0	0	0	0	0	0	0	0	0	0
	18:00:00	ZT11	0	0	0	0	0	0	0	0	0	0	0	0	0	0	0	0	0	0	0	0	0	0	0	0
	19:00:00	ZT12	0	0	0	0	0	0	0	0	0	0	0	0	0	0	0	0	0	0	0	0	0	0	0	0
	20:00:00	ZT13	0	0	0	0	0	0	0	0	0	0	0	0	0	0	0	0	0	0	0	0	0	0	0	0
	21:00:00	ZT14	0	0	0	0	0	0	0	0	0	0	0	0	0	0	0	0	0	0	0	0	0	0	0	0
	22:00:00	ZT15	0	0	0	0	0	0	0	0	0	0	0	0	0	0	0	0	0	0	0	0	0	0	0	0
	23:00:00	ZT16	0	0	0	0	0	0	0	0	0	0	0	0	0	0	0	0	0	0	0	0	0	0	0	0
	00:00:00	ZT17	0	0	0	0	0	0	0	0	0	0	0	0	0	0	0	0	0	0	0	0	0	0	0	0
	01:00:00	ZT18	0	0	0	0	0	0	0	0	0	0	0	0	0	0	0	0	0	0	0	0	0	0	0	0
	02:00:00	ZT19	0	0	0	0	0	0	0	0	0	0	0	0	0	0	0	0	0	0	0	0	0	0	0	0
	03:00:00	ZT20	0	0	0	0	0	0	0	0	0	0	0	0	0	0	0	0	0	0	0	0	0	0	0	0
	04:00:00	ZT21	0	0	0	0	0	0	0	0	0	0	0	0	0	0	0	0	0	0	0	0	0	0	0	0
	05:00:00	ZT22	0	0	0	0	0	0	0	0	0	0	0	0	0	0	0	0	0	0	0	0	0	0	0	0
	06:00:00	ZT23	0	0	0	0	0	0	0	0	0	0	0	0	0	0	0	0	0	0	0	0	0	0	0	0
	-	sum	0	0	0	0	0	0	0	0	0	0	0	0	0	0	0	0	0	0	0	0	0	0	0	0
	WT Wingless Males with Wings Surgically Removed
	Time	Replicate	Tub-1	Tub-2	Tub-3	Tub-4	Tub-5	Tub-6	Tub-7	Tub-8	Tub-9	Tub-10	Tub-11	Tub-12	Tub-13	Tub-14	Tub-15	Tub-16	Tub-17	Tub-18	Tub-19	Tub-20	Tub-21	Tub-22	Tub-23	Tub-24
	07:00:00	ZT0	0	0	0	0	0	0	0	0	0	0	0	0	0	0	0	0	0	0	0	0	0	0	0	0
	08:00:00	ZT1	0	0	0	0	0	0	0	0	0	0	0	0	0	0	0	0	0	0	0	0	0	0	0	0
	09:00:00	ZT2	0	0	0	0	0	0	0	0	0	0	0	0	0	0	0	0	0	0	0	0	0	0	0	0
	10:00:00	ZT3	0	0	0	0	0	0	0	0	0	0	0	0	0	0	0	0	0	0	0	0	0	0	0	0
	11:00:00	ZT4	0	0	0	0	0	0	0	0	0	0	0	0	0	0	0	0	0	0	0	0	0	0	0	0
	12:00:00	ZT5	0	0	0	0	0	0	0	0	0	0	0	0	0	0	0	0	0	0	0	0	0	0	0	0
	13:00:00	ZT6	0	0	0	0	0	0	0	0	0	0	0	0	0	0	0	0	0	0	0	0	0	0	0	0
	14:00:00	ZT7	0	0	0	0	0	0	0	0	0	0	0	0	0	0	0	0	0	0	0	0	0	0	0	0
	15:00:00	ZT8	0	0	0	0	0	0	0	0	0	0	0	0	0	0	0	0	0	0	0	0	0	0	0	0
	16:00:00	ZT9	0	0	0	0	0	0	0	0	0	0	0	0	0	0	0	0	0	0	0	0	0	0	0	0
	17:00:00	ZT10	0	0	0	0	0	0	0	0	0	0	0	0	0	0	0	0	0	0	0	0	0	0	0	0
	18:00:00	ZT11	0	0	0	0	0	0	0	0	0	0	0	0	0	0	0	0	0	0	0	0	0	0	0	0
	19:00:00	ZT12	0	0	0	0	0	0	0	0	0	0	0	0	0	0	0	0	0	0	0	0	0	0	0	0
	20:00:00	ZT13	0	0	0	0	0	0	0	0	0	0	0	0	0	0	0	0	0	0	0	0	0	0	0	0
	21:00:00	ZT14	0	0	0	0	0	0	0	0	0	0	0	0	0	0	0	0	0	0	0	0	0	0	0	0
	22:00:00	ZT15	0	0	0	0	0	0	0	0	0	0	0	0	0	0	0	0	0	0	0	0	0	0	0	0
	23:00:00	ZT16	0	0	0	0	0	0	0	0	0	0	0	0	0	0	0	0	0	0	0	0	0	0	0	0
	00:00:00	ZT17	0	0	0	0	0	0	0	0	0	0	0	0	0	0	0	0	0	0	0	0	0	0	0	0
	01:00:00	ZT18	0	0	0	0	0	0	0	0	0	0	0	0	0	0	0	0	0	0	0	0	0	0	0	0
	02:00:00	ZT19	0	0	0	0	0	0	0	0	0	0	0	0	0	0	0	0	0	0	0	0	0	0	0	0
	03:00:00	ZT20	0	0	0	0	0	0	0	0	0	0	0	0	0	0	0	0	0	0	0	0	0	0	0	0
	04:00:00	ZT21	0	0	0	0	0	0	0	0	0	0	0	0	0	0	0	0	0	0	0	0	0	0	0	0
	05:00:00	ZT22	0	0	0	0	0	0	0	0	0	0	0	0	0	0	0	0	0	0	0	0	0	0	0	0
	06:00:00	ZT23	0	0	0	0	0	0	0	0	0	0	0	0	0	0	0	0	0	0	0	0	0	0	0	0
	-	sum	0	0	0	0	0	0	0	0	0	0	0	0	0	0	0	0	0	0	0	0	0	0	0	0

## Sheet: Flight Statistics
Female flight activity				Male flight activity
Welch's ANOVA				One Way ANOVA
All Comparisons	F statistic	1.99495		Source	DF	Sum of squares	Mean square	F-stat	P-value
	df	49		Treatment	2	1.35628e+06	678139	117.875	<0.001
	P value	<0.0001		Error	69	396959	5753
	Significant	Yes		Total	71	743.774
wt vs pgSIT	F statistic	132.782
	df	49
	mean [wt]	150.167		Means
	mean [pgSIT]	0						95% Confidence Interval
	P value	<0.0001			DF	Mean	SE	Lower	Upper
	Significant	Yes		pgSIT	24	297.333	15.483	266.4	328.22
wt vs wingless	t statistic	132.782		wingless	24	0	15.483	-30.9	30.89
	df	49		wt	24	284.542	15.483	253.7	315.43
	mean [wt]	150.167
	mean [wingless]	0
	P value	<0.0001
	Significant	Yes
