# Supplementary material for: Eliminating Mosquitoes with Precision Guided Sterile Males
Source: Research Square preprint supplement (doi:10.21203/rs.3.rs-367110/v1), 2021-04-05
Supplement: Supplementary file 15 [file Table S7 - Sound Attraction Assay_.xlsx]

## Sheet: Table S10
Table S10 - Sound Attraction Assay
	Cage	LVP	PgSIT Mutant
	1	63.16	60
	2	60	60
	3	53.33	66.67
	4	45.45	70
	5	70	46.67
	6	66.67	56.67

## Sheet: Sound Attraction Statistics
Sound Attraction Assay
One Way ANOVA
Source	DF	Sum of squares	Mean square	F-stat	P-value
Treatment	1	0.16333	0.1633	0.0022	0.9635
Error	10	743.611	743.361
Total	11	743.774
Means
				95% Confidence Interval
	DF	Mean	SE	Lower	Upper
LVP	6	59.7683	3.5204	51.924	67.612
pgSIT mutant	6	60.0017	3.5204	52.158	67.846
