# Supplementary material for: Eliminating Mosquitoes with Precision Guided Sterile Males
Source: Research Square preprint supplement (doi:10.21203/rs.3.rs-367110/v1), 2021-04-05
Supplement: Supplementary file 16 [file Table S8 - pgSIT males sterilize WT females.xlsx]

## Sheet: Sheet1
	Table S6 - pgSIT males sterilize WT females
			gonotrophic cycle #1					gonotrophic cycle #2					gonotrophic cycle #3					gonotrophic cycle #4					gonotrophic cycle #5						total ♀ fertility %
	experimental group	group name	♀ # took blood (1)	♀ # laid eggs (1)	fertile ♀ # (1)	sterile ♀ # (1)	♀ fertility % (1)	♀ # took blood (2)	♀ # laid eggs (2)	fertile ♀ # (2)	sterile ♀ # (2)	♀ fertility % (2)	♀ # took blood (3)	♀ # laid eggs (3)	fertile ♀ # (3)	sterile ♀ # (3)	♀ fertility % (3)	♀ # took blood (4)	♀ # laid eggs (4)	fertile ♀ # (4)	sterile ♀ # (4)	♀ fertility % (4)	♀ # took blood (5)	♀ # laid eggs (5)	fertile ♀ # (5)	sterile ♀ # (5)	♀ fertility % (5)	Maximum tested ♀ #	Maximum fertile ♀ #	Maximum ♀ fertility %
	50 WT♀ X 250 WT♂ *	WT ♂	50	50	50	0	1	45	45	45	0	1	41	41	41	0	1	30	30	30	0	1	25	25	25	0	1	50	50	1
	50 WT♀ X 250 WT♂ *	WT ♂	49	49	49	0	1	46	46	46	0	1	40	40	40	0	1	34	34	34	0	1	20	20	20	0	1	49	49	1
	50 WT♀ X 250 WT♂ *	WT ♂	50	50	50	0	1	48	48	48	0	1	41	41	41	0	1	28	28	28	0	1	21	21	21	0	1	50	50	1
	50 WT♀ †	no WT ♂	47	44	0	44	0	38	36	0	36	0	30	27	0	27	0	18	15	0	15	0	11	11	0	11	0	44	0	0
	50 WT♀ †	no WT ♂	49	47	0	47	0	41	39	0	39	0	29	26	0	26	0	20	16	0	16	0	9	8	0	8	0	47	0	0
	50 WT♀ †	no WT ♂	48	45	0	45	0	36	33	0	33	0	25	22	0	22	0	16	13	0	13	0	12	9	0	9	0	45	0	0
	50 WT♀ after 1st gonotrophic cycle X 250 WT♂ †	later WT ♂	49	46	0	46	0	45	45	45	0	1	41	41	41	0	1	31	31	31	0	1	14	14	14	0	1	45	45	1
	50 WT♀ after 1st gonotrophic cycle X 250 WT♂ †	later WT ♂	49	45	0	45	0	41	41	41	0	1	38	38	38	0	1	32	32	32	0	1	18	18	18	0	1	41	41	1
	50 WT♀ after 1st gonotrophic cycle X 250 WT♂ †	later WT ♂	48	44	0	44	0	38	38	38	0	1	37	37	37	0	1	25	25	25	0	1	17	17	17	0	1	38	38	1
	50 WT♀ X 250 pgSIT♂(2hours) X 250 WT ♂(2days) †	2H-pgSIT♂	50	49	28	21	0.571429	19	18	0	18	0	17	15	0	15	0	11	8	0	8	0	5	4	0	4	0	49	28	0.571429
	50 WT♀ X 250 pgSIT♂(2hours) X 250 WT ♂(2days) †	2H-pgSIT♂	47	47	33	14	0.702128	13	13	0	13	0	11	11	0	11	0	6	6	0	6	0	4	4	0	4	0	47	33	0.702128
	50 WT♀ X 250 pgSIT♂(2hours) X 250 WT ♂(2days) †	2H-pgSIT♂	48	47	29	18	0.617021	16	15	0	15	0	15	13	0	13	0	9	7	0	7	0	6	4	0	4	0	47	29	0.617021
	50 WT♀ X 250 pgSIT♂(6hours) X 250 WT ♂(2days) †	6H-pgSIT♂	50	47	28	19	0.595745	18	16	0	16	0	13	11	0	11	0	13	11	0	11	0	12	10	0	10	0	47	28	0.595745
	50 WT♀ X 250 pgSIT♂(6hours) X 250 WT ♂(2days) †	6H-pgSIT♂	49	47	20	27	0.425532	22	20	0	20	0	18	17	0	17	0	16	14	0	14	0	10	8	0	8	0	47	20	0.425532
	50 WT♀ X 250 pgSIT♂(6hours) X 250 WT ♂(2days) †	6H-pgSIT♂	50	48	18	30	0.375	26	24	0	24	0	20	18	0	18	0	9	17	0	17	0	18	6	0	6	0	48	18	0.375
	50 WT♀ X 250 pgSIT♂(12hours) X 250 WT ♂(2days) †	12H-pgSIT♂	50	48	11	37	0.229167	28	25	0	25	0	24	20	0	20	0	16	14	0	14	0	12	9	0	9	0	48	11	0.229167
	50 WT♀ X 250 pgSIT♂(12hours) X 250 WT ♂(2days) †	12H-pgSIT♂	50	47	15	32	0.319149	27	24	0	24	0	21	18	0	18	0	14	11	0	11	0	7	5	0	5	0	47	15	0.319149
	50 WT♀ X 250 pgSIT♂(12hours) X 250 WT ♂(2days) †	12H-pgSIT♂	48	45	7	38	0.155556	33	31	0	31	0	24	22	0	22	0	17	14	0	14	0	9	7	0	7	0	45	7	0.155556
	50 WT♀ X 250 pgSIT♂(24hours) X 250 WT ♂(2days) †	24H-pgSIT♂	49	47	1	46	0.0212766	43	41	0	41	0	30	26	0	26	0	25	23	0	23	0	17	14	0	14	0	47	1	0.0212766
	50 WT♀ X 250 pgSIT♂(24hours) X 250 WT ♂(2days) †	24H-pgSIT♂	48	47	0	47	0	40	38	0	38	0	33	29	0	29	0	26	23	0	23	0	14	12	0	12	0	47	0	0
	50 WT♀ X 250 pgSIT♂(24hours) X 250 WT ♂(2days) †	24H-pgSIT♂	50	48	2	46	0.0416667	37	36	0	36	0	31	28	0	28	0	23	21	1	20	0.047619	9	6	0	6	0	48	3	0.0625
	50 WT♀ X 250 pgSIT♂(48hours) X 250 WT ♂(2days) †	48H-pgSIT♂	50	49	0	49	0	45	42	0	42	0	34	32	0	32	0	21	19	0	19	0	16	14	0	14	0	49	0	0
	50 WT♀ X 250 pgSIT♂(48hours) X 250 WT ♂(2days) †	48H-pgSIT♂	48	47	0	47	0	43	42	0	42	0	35	32	2	30	0.0625	20	19	0	19	0	12	11	0	11	0	47	2	0.0425532
	50 WT♀ X 250 pgSIT♂(48hours) X 250 WT ♂(2days) †	48H-pgSIT♂	49	47	0	47	0	41	39	0	39	0	32	31	0	31	0	25	23	0	23	0	16	14	0	14	0	47	0	0
	*We transferred all females that took blood, and since all of them can lay eggs, and eggs can hatch, we repeat this 5 gonotropic cycles
	† non-fertile ♀’s were then placed back into cages along with the original WT ♂ s (plus 50 new mature WT ♂ s) for another chance to produce progeny. This was repeated for up to five gonotrophic cycles.
