# Supplementary material for: Eliminating Mosquitoes with Precision Guided Sterile Males
Source: Research Square preprint supplement (doi:10.21203/rs.3.rs-367110/v1), 2021-04-05
Supplement: Supplementary file 17 [file Table S9 - Mean coverage Depth - Nanopore.xlsx]

## Sheet: Sheet1
	Table S11 - The mean coverage depth from the Nanopore DNA sequencing for all contigs in the genome (2310) and the three plasmids (OA-1067A1: gRNAβTub; OA-1067K: gRNAmyo-fem; and OA-874PA: Nup50-Cas9) as well as normalized coverage based on the global number (Table S12). Transgene coverage ranged from 5.1 to 7.6 and normalized coverage - from 0.93 to 1.38
	ID	length	bases_covered	mean_coverage	normalized_mean_coverage
	OA_874PA	11557	87615	7.58112	1.37957
	OA_1067A1	9398	49648	5.28283	0.96134
	OA_1067K	10070	51452	5.10943	0.929787
	NC_035107.1	310827022	1882323727	6.05586	1.10201
	NC_035108.1	474425716	2662673136	5.61241	1.02132
	NC_035109.1	409777670	2240782245	5.46829	0.995089
